# Supplementary material for: A hybrid computational framework for intelligent inter-continent SARS-CoV-2 sub-strains characterization and prediction
Source: Sci Rep. 2021 Jul 15;11:14558. doi: 10.1038/s41598-021-93757-w (PMC8282786; doi:10.1038/s41598-021-93757-w)
Supplement: Supplementary file 7 — Supplementary Information 7. [file 41598_2021_93757_MOESM7_ESM.xlsx]

## Sheet: Reference
Ref
A
T
T
A
A
A
G
G
T
T
T
A
T
A
C
C
T
T
C
C
C
A
G
G
T
A
A
C
A
A
A
C
C
A
A
C
C
A
A
C
T
T
T
C
G
A
T
C
T
C
T
T
G
T
A
G
A
T
C
T
G
T
T
C
T
C
T
A
A
A
C
G
A
A
C
T
T
T
A
A
A
A
T
C
T
G
T
G
T
G
G
C
T
G
T
C
A
C
T
C
G
G
C
T
G
C
A
T
G
C
T
T
A
G
T
G
C
A
C
T
C
A
C
G
C
A
G
T
A
T
A
A
T
T
A
A
T
A
A
C
T
A
A
T
T
A
C
T
G
T
C
G
T
T
G
A
C
A
G
G
A
C
A
C
G
A
G
T
A
A
C
T
C
G
T
C
T
A
T
C
T
T
C
T
G
C
A
G
G
C
T
G
C
T
T
A
C
G
G
T
T
T
C
G
T
C
C
G
T
G
T
T
G
C
A
G
C
C
G
A
T
C
A
T
C
A
G
C
A
C
A
T
C
T
A
G
G
T
T
T
C
G
T
C
C
G
G
G
T
G
T
G
A
C
C
G
A
A
A
G
G
T
A
A
G
A
T
G
G
A
G
A
G
C
C
T
T
G
T
C
C
C
T
G
G
T
T
T
C
A
A
C
G
A
G
A
A
A
A
C
A
C
A
C
G
T
C
C
A
A
C
T
C
A
G
T
T
T
G
C
C
T
G
T
T
T
T
A
C
A
G
G
T
T
C
G
C
G
A
C
G
T
G
C
T
C
G
T
A
C
G
T
G
G
C
T
T
T
G
G
A
G
A
C
T
C
C
G
T
G
G
A
G
G
A
G
G
T
C
T
T
A
T
C
A
G
A
G
G
C
A
C
G
T
C
A
A
C
A
T
C
T
T
A
A
A
G
A
T
G
G
C
A
C
T
T
G
T
G
G
C
T
T
A
G
T
A
G
A
A
G
T
T
G
A
A
A
A
A
G
G
C
G
T
T
T
T
G
C
C
T
C
A
A
C
T
T
G
A
A
C
A
G
C
C
C
T
A
T
G
T
G
T
T
C
A
T
C
A
A
A
C
G
T
T
C
G
G
A
T
G
C
T
C
G
A
A
C
T
G
C
A
C
C
T
C
A
T
G
G
T
C
A
T
G
T
T
A
T
G
G
T
T
G
A
G
C
T
G
G
T
A
G
C
A
G
A
A
C
T
C
G
A
A
G
G
C
A
T
T
C
A
G
T
A
C
G
G
T
C
G
T
A
G
T
G
G
T
G
A
G
A
C
A
C
T
T
G
G
T
G
T
C
C
T
T
G
T
C
C
C
T
C
A
T
G
T
G
G
G
C
G
A
A
A
T
A
C
C
A
G
T
G
G
C
T
T
A
C
C
G
C
A
A
G
G
T
T
C
T
T
C
T
T
C
G
T
A
A
G
A
A
C
G
G
T
A
A
T
A
A
A
G
G
A
G
C
T
G
G
T
G
G
C
C
A
T
A
G
T
T
A
C
G
G
C
G
C
C
G
A
T
C
T
A
A
A
G
T
C
A
T
T
T
G
A
C
T
T
A
G
G
C
G
A
C
G
A
G
C
T
T
G
G
C
A
C
T
G
A
T
C
C
T
T
A
T
G
A
A
G
A
T
T
T
T
C
A
A
G
A
A
A
A
C
T
G
G
A
A
C
A
C
T
A
A
A
C
A
T
A
G
C
A
G
T
G
G
T
G
T
T
A
C
C
C
G
T
G
A
A
C
T
C
A
T
G
C
G
T
G
A
G
C
T
T
A
A
C
G
G
A
G
G
G
G
C
A
T
A
C
A
C
T
C
G
C
T
A
T
G
T
C
G
A
T
A
A
C
A
A
C
T
T
C
T
G
T
G
G
C
C
C
T
G
A
T
G
G
C
T
A
C
C
C
T
C
T
T
G
A
G
T
G
C
A
T
T
A
A
A
G
A
C
C
T
T
C
T
A
G
C
A
C
G
T
G
C
T
G
G
T
A
A
A
G
C
T
T
C
A
T
G
C
A
C
T
T
T
G
T
C
C
G
A
A
C
A
A
C
T
G
G
A
C
T
T
T
A
T
T
G
A
C
A
C
T
A
A
G
A
G
G
G
G
T
G
T
A
T
A
C
T
G
C
T
G
C
C
G
T
G
A
A
C
A
T
G
A
G
C
A
T
G
A
A
A
T
T
G
C
T
T
G
G
T
A
C
A
C
G
G
A
A
C
G
T
T
C
T
G
A
A
A
A
G
A
G
C
T
A
T
G
A
A
T
T
G
C
A
G
A
C
A
C
C
T
T
T
T
G
A
A
A
T
T
A
A
A
T
T
G
G
C
A
A
A
G
A
A
A
T
T
T
G
A
C
A
C
C
T
T
C
A
A
T
G
G
G
G
A
A
T
G
T
C
C
A
A
A
T
T
T
T
G
T
A
T
T
T
C
C
C
T
T
A
A
A
T
T
C
C
A
T
A
A
T
C
A
A
G
A
C
T
A
T
T
C
A
A
C
C
A
A
G
G
G
T
T
G
A
A
A
A
G
A
A
A
A
A
G
C
T
T
G
A
T
G
G
C
T
T
T
A
T
G
G
G
T
A
G
A
A
T
T
C
G
A
T
C
T
G
T
C
T
A
T
C
C
A
G
T
T
G
C
G
T
C
A
C
C
A
A
A
T
G
A
A
T
G
C
A
A
C
C
A
A
A
T
G
T
G
C
C
T
T
T
C
A
A
C
T
C
T
C
A
T
G
A
A
G
T
G
T
G
A
T
C
A
T
T
G
T
G
G
T
G
A
A
A
C
T
T
C
A
T
G
G
C
A
G
A
C
G
G
G
C
G
A
T
T
T
T
G
T
T
A
A
A
G
C
C
A
C
T
T
G
C
G
A
A
T
T
T
T
G
T
G
G
C
A
C
T
G
A
G
A
A
T
T
T
G
A
C
T
A
A
A
G
A
A
G
G
T
G
C
C
A
C
T
A
C
T
T
G
T
G
G
T
T
A
C
T
T
A
C
C
C
C
A
A
A
A
T
G
C
T
G
T
T
G
T
T
A
A
A
A
T
T
T
A
T
T
G
T
C
C
A
G
C
A
T
G
T
C
A
C
A
A
T
T
C
A
G
A
A
G
T
A
G
G
A
C
C
T
G
A
G
C
A
T
A
G
T
C
T
T
G
C
C
G
A
A
T
A
C
C
A
T
A
A
T
G
A
A
T
C
T
G
G
C
T
T
G
A
A
A
A
C
C
A
T
T
C
T
T
C
G
T
A
A
G
G
G
T
G
G
T
C
G
C
A
C
T
A
T
T
G
C
C
T
T
T
G
G
A
G
G
C
T
G
T
G
T
G
T
T
C
T
C
T
T
A
T
G
T
T
G
G
T
T
G
C
C
A
T
A
A
C
A
A
G
T
G
T
G
C
C
T
A
T
T
G
G
G
T
T
C
C
A
C
G
T
G
C
T
A
G
C
G
C
T
A
A
C
A
T
A
G
G
T
T
G
T
A
A
C
C
A
T
A
C
A
G
G
T
G
T
T
G
T
T
G
G
A
G
A
A
G
G
T
T
C
C
G
A
A
G
G
T
C
T
T
A
A
T
G
A
C
A
A
C
C
T
T
C
T
T
G
A
A
A
T
A
C
T
C
C
A
A
A
A
A
G
A
G
A
A
A
G
T
C
A
A
C
A
T
C
A
A
T
A
T
T
G
T
T
G
G
T
G
A
C
T
T
T
A
A
A
C
T
T
A
A
T
G
A
A
G
A
G
A
T
C
G
C
C
A
T
T
A
T
T
T
T
G
G
C
A
T
C
T
T
T
T
T
C
T
G
C
T
T
C
C
A
C
A
A
G
T
G
C
T
T
T
T
G
T
G
G
A
A
A
C
T
G
T
G
A
A
A
G
G
T
T
T
G
G
A
T
T
A
T
A
A
A
G
C
A
T
T
C
A
A
A
C
A
A
A
T
T
G
T
T
G
A
A
T
C
C
T
G
T
G
G
T
A
A
T
T
T
T
A
A
A
G
T
T
A
C
A
A
A
A
G
G
A
A
A
A
G
C
T
A
A
A
A
A
A
G
G
T
G
C
C
T
G
G
A
A
T
A
T
T
G
G
T
G
A
A
C
A
G
A
A
A
T
C
A
A
T
A
C
T
G
A
G
T
C
C
T
C
T
T
T
A
T
G
C
A
T
T
T
G
C
A
T
C
A
G
A
G
G
C
T
G
C
T
C
G
T
G
T
T
G
T
A
C
G
A
T
C
A
A
T
T
T
T
C
T
C
C
C
G
C
A
C
T
C
T
T
G
A
A
A
C
T
G
C
T
C
A
A
A
A
T
T
C
T
G
T
G
C
G
T
G
T
T
T
T
A
C
A
G
A
A
G
G
C
C
G
C
T
A
T
A
A
C
A
A
T
A
C
T
A
G
A
T
G
G
A
A
T
T
T
C
A
C
A
G
T
A
T
T
C
A
C
T
G
[truncated: 27,904 more rows]

## Sheet: female
VEN_1	ARG_1	COL_1	COL_2	COL_3	COL_4	COL_5	COL_6	COL_7	COL_8	COL_9	COL_10	COL_11	COL_12	COL_13	COL_14	COL_15	COL_16	COL_17	COL_18	COL_19	COL_20	COL_21	COL_22	COL_23	COL_24	COL_25	COL_26	COL_27	COL_28	COL_29	COL_30	COL_31	COL_32	COL_33	COL_34	COL_35	COL_36	COL_37	COL_38	COL_39	COL_40	COL_41	COL_42	COL_43	COL_44	COL_45	COL_46	COL_47	COL_48
EPI_ISL_476704	EPI_ISL_499083	EPI_ISL_447780	EPI_ISL_447760	EPI_ISL_653745	EPI_ISL_447775	EPI_ISL_456151	EPI_ISL_526932	EPI_ISL_447786	EPI_ISL_447777	EPI_ISL_456139	EPI_ISL_447765	EPI_ISL_447766	EPI_ISL_447744	EPI_ISL_497738	EPI_ISL_456129	EPI_ISL_447817	EPI_ISL_497744	EPI_ISL_526933	EPI_ISL_456127	EPI_ISL_456140	EPI_ISL_653825	EPI_ISL_526954	EPI_ISL_418262	EPI_ISL_456135	EPI_ISL_456117	EPI_ISL_526967	EPI_ISL_447762	EPI_ISL_456148	EPI_ISL_456147	EPI_ISL_498163	EPI_ISL_653758	EPI_ISL_447758	EPI_ISL_447737	EPI_ISL_456116	EPI_ISL_653756	EPI_ISL_653747	EPI_ISL_447768	EPI_ISL_447746	EPI_ISL_447752	EPI_ISL_447795	EPI_ISL_445219	EPI_ISL_456128	EPI_ISL_447796	EPI_ISL_498154	EPI_ISL_497736	EPI_ISL_447769	EPI_ISL_447814	EPI_ISL_447797	EPI_ISL_456141
T	G	T	G	A	T	A	A	C	T	G	G	T	G	A	C	T	A	A	A	C	G	A	A	A	C	A	T	A	T	A	G	T	T	C	A	A	T	T	T	G	A	C	T	A	A	T	T	C	A
C	A	C	A	G	C	C	G	T	C	A	A	C	A	G	T	C	G	G	C	T	C	G	G	G	T	G	C	C	T	G	C	C	T	T	G	G	C	C	C	A	T	T	C	G	G	C	C	T	G
T	T	T	T	A	T	C	A	T	T	T	T	T	T	A	T	T	A	A	T	G	T	A	A	A	C	A	T	T	T	A	T	T	C	T	A	A	T	T	T	T	T	T	T	A	A	T	T	C	A
A	C	A	C	T	A	A	T	C	C	C	C	A	C	T	G	A	T	T	T	T	C	T	T	T	T	T	C	T	C	T	C	A	T	T	T	T	A	A	C	C	A	T	C	T	T	C	C	T	T
A	T	A	T	C	A	A	C	C	T	T	T	A	T	C	T	A	C	C	T	G	G	C	C	C	T	C	T	T	G	C	G	A	C	C	C	C	A	A	T	T	A	C	T	C	C	T	T	A	C
A	C	A	G	T	A	C	T	C	A	G	G	A	G	T	A	A	T	T	C	T	T	T	T	T	G	T	A	C	A	T	T	A	T	G	T	T	A	A	A	G	A	G	A	T	T	A	A	A	T
C	T	C	T	G	C	T	G	A	A	T	T	C	T	G	G	C	G	G	G	G	A	G	G	G	T	G	A	G	T	G	A	C	A	A	G	G	C	C	A	T	G	A	A	G	G	A	A	A	G
G	T	G	T	T	G	T	T	G	A	T	T	G	T	T	A	G	T	T	A	G	C	T	T	T	A	T	A	A	C	T	C	G	A	T	T	T	G	G	A	T	G	T	A	T	T	A	A	C	T
A	G	A	C	T	A	T	T	G	C	C	C	A	C	T	T	A	T	T	T	C	G	T	T	T	G	T	C	T	T	T	G	A	A	C	T	T	A	A	C	C	T	C	C	T	T	C	C	G	T
A	T	A	T	C	A	C	C	T	G	T	T	A	T	C	C	A	C	C	C	T	T	C	C	C	A	C	G	C	C	C	T	A	C	T	C	C	A	A	G	T	T	T	G	C	C	G	G	A	C
C	A	C	C	T	C	G	T	A	A	C	C	C	C	T	T	C	T	T	T	G	G	T	T	T	T	T	A	T	T	T	G	C	G	C	T	T	C	C	A	C	T	C	A	T	T	A	A	A	T
T	G	T	T	C	T	A	C	A	A	T	T	T	T	C	G	T	C	C	C	T	G	C	C	C	C	C	A	C	T	C	G	T	A	T	C	C	T	T	A	T	A	T	A	C	C	A	A	C	C
T	A	T	A	T	T	T	T	C	C	A	A	T	A	T	T	T	T	T	T	C	C	T	T	T	T	T	C	T	G	T	C	T	A	T	T	T	T	T	C	A	T	T	C	T	T	C	C	T	T
T	T	T	A	A	T	C	A	A	T	A	A	T	A	A	T	T	A	A	T	A	T	A	A	A	G	A	T	T	T	A	T	T	C	G	A	A	T	T	T	A	A	G	T	A	A	T	T	T	A
A	C	A	A	A	A	T	A	A	T	A	A	A	A	A	C	A	A	A	G	C	T	A	A	A	T	A	T	G	A	A	T	A	T	T	A	A	A	A	T	A	C	T	T	A	A	T	T	T	A
A	T	A	C	A	A	C	A	A	T	C	C	A	C	A	T	A	A	A	T	T	T	A	A	A	T	A	T	T	G	A	T	A	T	A	A	A	A	A	T	C	C	A	T	A	A	T	T	A	A
A	G	A	G	C	A	T	C	C	A	G	G	A	G	C	C	A	C	C	A	C	G	C	C	C	C	C	A	A	A	C	G	A	T	G	C	C	A	A	A	G	T	G	A	C	C	A	A	A	C
A	T	A	A	G	A	T	G	C	A	A	A	A	A	G	T	A	G	G	G	G	G	G	G	G	T	G	A	G	T	G	G	A	A	A	G	G	A	A	A	A	T	A	A	G	G	A	A	A	G
T	T	T	A	A	T	G	A	A	A	A	A	T	A	A	A	T	A	A	A	G	A	A	A	A	C	A	A	A	C	A	A	T	A	T	A	A	T	T	A	A	C	T	A	A	A	A	A	A	A
C	C	C	C	A	C	T	A	A	A	C	C	C	C	A	A	C	A	A	T	C	G	A	A	A	T	A	A	T	T	A	G	C	A	C	A	A	C	C	A	C	C	C	A	A	A	A	A	T	A
T	T	T	T	C	T	A	C	C	T	T	T	T	T	C	A	T	C	C	C	T	A	C	C	C	A	C	T	C	G	C	A	T	A	T	C	C	T	T	T	T	C	T	T	C	C	T	T	C	C
G	C	G	T	T	G	G	T	C	C	T	T	G	T	T	C	G	T	T	T	G	C	T	T	T	A	T	C	T	T	T	C	G	T	G	T	T	G	G	C	T	A	G	C	T	T	C	C	T	T
T	T	T	T	T	T	A	T	A	T	T	T	T	T	T	G	T	T	T	G	C	T	T	T	T	A	T	T	G	T	T	T	T	C	T	T	T	T	T	T	T	G	T	T	T	T	T	T	G	T
G	A	G	A	T	G	T	T	A	G	A	A	G	A	T	A	G	T	T	T	A	C	T	T	T	C	T	G	T	C	T	C	G	T	T	T	T	G	G	G	A	G	T	G	T	T	G	G	T	T
T	A	T	A	A	T	C	A	C	T	A	A	T	A	A	A	T	A	A	T	T	C	A	A	A	G	A	T	T	T	A	C	T	G	C	A	A	T	T	T	A	T	C	T	A	A	T	T	G	A
G	A	G	A	A	G	T	A	T	G	A	A	G	A	A	C	G	A	A	C	G	G	A	A	A	A	A	G	C	C	A	G	G	T	T	A	A	G	G	G	A	A	T	G	A	A	G	G	T	A
G	C	G	A	A	G	G	A	T	T	A	A	G	A	A	T	G	A	A	T	C	T	A	A	A	A	A	T	T	T	A	T	G	G	C	A	A	G	G	T	A	A	C	T	A	A	T	T	G	A
C	G	C	T	A	C	T	A	T	G	T	T	C	T	A	T	C	A	A	C	T	G	A	A	A	C	A	G	C	A	A	G	C	T	T	A	A	C	C	G	T	C	T	G	A	A	G	G	G	A
T	A	T	C	T	T	T	T	C	G	C	C	T	C	T	T	T	T	T	T	T	G	T	T	T	T	T	G	T	A	T	G	T	G	A	T	T	T	T	G	C	A	A	G	T	T	G	G	C	T
G	A	G	T	C	G	C	C	G	C	T	T	G	T	C	A	G	C	C	A	A	A	C	C	C	T	C	C	A	A	C	A	G	G	A	C	C	G	G	C	T	A	A	C	C	C	C	C	T	C
T	C	T	G	T	T	T	T	A	T	G	G	T	G	T	A	T	T	T	A	G	G	T	T	T	T	T	T	A	C	T	G	T	C	A	T	T	T	T	T	G	A	A	T	T	T	T	T	G	T
C	T	C	T	G	C	C	G	T	G	T	T	C	T	G	A	C	G	G	A	T	G	G	G	G	A	G	G	A	G	G	G	C	T	C	G	G	C	C	G	T	C	C	G	G	G	G	G	T	G
A	T	A	G	T	A	T	T	C	T	G	G	A	G	T	A	A	T	T	C	G	A	T	T	T	A	T	T	C	A	T	A	A	G	G	T	T	A	A	T	G	C	G	T	T	T	T	T	C	T
C	T	C	T	G	C	A	G	T	C	T	T	C	T	G	T	C	G	G	G	C	G	G	G	G	A	G	C	G	A	G	G	C	T	A	G	G	C	C	C	T	A	A	C	G	G	C	C	A	G
T	A	T	G	T	T	A	T	C	A	G	G	T	G	T	C	T	T	T	A	A	G	T	T	T	A	T	A	A	C	T	G	T	C	A	T	T	T	T	A	G	A	A	A	T	T	A	A	C	T
C	A	C	G	G	C	A	G	T	C	G	G	C	G	G	T	C	G	G	A	C	T	G	G	G	T	G	C	A	T	G	T	C	A	C	G	G	C	C	C	G	C	C	C	G	G	C	C	T	G
G	A	G	C	G	G	C	G	T	T	C	C	G	C	G	G	G	G	G	C	T	C	G	G	G	C	G	T	C	T	G	C	G	C	T	G	G	G	G	T	C	C	T	T	G	G	T	T	C	G
G	A	G	T	C	G	G	C	G	C	T	T	G	T	C	T	G	C	C	T	C	T	C	C	C	T	C	C	T	T	C	T	G	T	T	C	C	G	G	C	T	A	T	C	C	C	C	C	G	C
C	T	C	G	T	C	A	T	T	G	G	G	C	G	T	G	C	T	T	T	A	T	T	T	T	G	T	G	T	A	T	T	C	C	T	T	T	C	C	G	G	A	T	G	T	T	G	G	G	T
T	C	T	T	G	T	A	G	A	G	T	T	T	T	G	T	T	G	G	T	C	A	G	G	G	T	G	G	T	A	G	A	T	G	A	G	G	T	T	G	T	C	A	G	G	G	G	G	C	G
G	T	G	C	T	G	C	T	G	C	C	C	G	C	T	G	G	T	T	A	G	T	T	T	T	G	T	C	A	A	T	T	G	G	A	T	T	G	G	C	C	T	A	C	T	T	C	C	T	T
C	G	C	A	C	C	T	C	A	T	A	A	C	A	C	G	C	C	C	A	C	C	C	C	C	T	C	T	A	A	C	C	C	C	A	C	C	C	C	T	A	T	A	T	C	C	T	T	G	C
A	T	A	C	A	A	T	A	T	G	C	C	A	C	A	C	A	A	A	A	A	A	A	A	A	G	A	G	A	T	A	A	A	T	A	A	A	A	A	G	C	T	A	G	A	A	G	G	C	A
T	G	T	T	C	T	T	C	C	C	T	T	T	T	C	T	T	C	C	A	G	G	C	C	C	G	C	C	A	C	C	G	T	G	T	C	C	T	T	C	T	C	T	C	C	C	C	C	A	C
G	T	G	C	T	G	A	T	T	A	C	C	G	C	T	G	G	T	T	T	T	A	T	T	T	C	T	A	T	T	T	A	G	C	C	T	T	G	G	A	C	G	C	A	T	T	A	A	T	T
C	G	C	G	C	C	A	C	G	T	G	G	C	G	C	T	C	C	C	C	A	G	C	C	C	T	C	T	C	G	C	G	C	A	T	C	C	C	C	T	G	A	T	T	C	C	T	T	G	C
T	G	T	G	G	T	A	G	T	G	G	G	T	G	G	C	T	G	G	T	T	G	G	G	G	G	G	G	T	T	G	G	T	T	G	G	G	T	T	G	G	T	G	G	G	G	G	G	C	G
T	C	T	C	G	T	A	G	T	C	C	C	T	C	G	A	T	G	G	G	A	C	G	G	G	T	G	C	G	G	G	C	T	G	T	G	G	T	T	C	C	C	T	C	G	G	C	C	T	G
A	T	A	T	C	A	T	C	C	T	T	T	A	T	C	C	A	C	C	T	A	A	C	C	C	C	C	T	T	T	C	A	A	C	G	C	C	A	A	T	T	T	G	T	C	C	T	T	T	C
G	G	G	G	T	G	C	T	T	T	G	G	G	G	T	T	G	T	T	G	T	C	T	T	T	A	T	T	G	G	T	C	G	T	T	T	T	G	G	T	G	C	T	T	T	T	T	T	A	T
T	T	T	C	G	T	T	G	C	A	C	C	T	C	G	C	T	G	G	T	T	G	G	G	G	C	G	A	T	G	G	G	T	T	G	G	G	T	T	A	C	T	G	A	G	G	A	A	G	G
G	C	G	A	C	G	G	C	T	G	A	A	G	A	C	G	G	C	C	G	A	T	C	C	C	T	C	G	G	C	C	T	G	A	G	C	C	G	G	G	A	T	G	G	C	C	G	G	T	C
C	A	C	T	A	C	T	A	A	T	T	T	C	T	A	G	C	A	A	G	A	C	A	A	A	C	A	T	G	T	A	C	C	G	C	A	A	C	C	T	T	G	C	T	A	A	T	T	G	A
A	C	A	G	T	A	G	T	A	G	G	G	A	G	T	C	A	T	T	C	T	A	T	T	T	G	T	G	C	G	T	A	A	T	T	T	T	A	A	G	G	T	T	G	T	T	G	G	C	T
C	T	C	C	G	C	T	G	A	C	C	C	C	C	G	T	C	G	G	T	A	A	G	G	G	G	G	C	T	T	G	A	C	G	G	G	G	C	C	C	C	A	G	C	G	G	C	C	A	G
T	C	T	T	C	T	G	C	C	A	T	T	T	T	C	G	T	C	C	G	A	C	C	C	C	C	C	A	G	C	C	C	T	C	T	C	C	T	T	A	T	G	T	A	C	C	A	A	C	C
C	G	C	T	T	C	G	T	G	C	T	T	C	T	T	C	C	T	T	T	C	A	T	T	T	T	T	C	T	A	T	A	C	A	C	T	T	C	C	C	T	A	C	C	T	T	C	C	T	T
A	G	A	A	T	A	C	T	A	T	A	A	A	A	T	A	A	T	T	C	T	T	T	T	T	G	T	T	C	C	T	T	A	C	A	T	T	A	A	T	A	T	A	T	T	T	T	T	C	T
C	C	C	G	A	C	T	A	A	C	G	G	C	G	A	T	C	A	A	A	A	C	A	A	A	C	A	C	A	T	A	C	C	T	C	A	A	C	C	C	G	C	C	C	A	A	C	C	A	A
G	T	G	T	G	G	G	G	C	A	T	T	G	T	G	G	G	G	G	C	A	T	G	G	G	A	G	A	C	C	G	T	G	C	T	G	G	G	G	A	T	T	T	A	G	G	A	A	C	G
C	G	C	G	T	C	T	T	T	C	G	G	C	G	T	C	C	T	T	T	T	T	T	T	T	T	T	C	T	G	T	T	C	A	C	T	T	C	C	C	G	G	C	C	T	T	C	C	G	T
A	C	A	C	G	A	C	G	T	G	C	C	A	C	G	T	A	G	G	C	T	A	G	G	G	G	G	G	C	G	G	A	A	C	G	G	G	A	A	G	C	T	G	G	G	G	G	G	C	G
G	A	G	A	C	G	A	C	T	C	A	A	G	A	C	T	G	C	C	G	A	A	C	C	C	C	C	C	G	C	C	A	G	G	G	C	C	G	G	C	A	T	G	C	C	C	C	C	A	C
T	T	T	C	A	T	C	A	A	A	C	C	T	C	A	A	T	A	A	G	C	A	A	A	A	T	A	A	G	T	A	A	T	C	C	A	A	T	T	A	C	C	C	A	A	A	A	A	G	A
A	G	A	T	C	A	T	C	A	G	T	T	A	T	C	G	A	C	C	C	T	G	C	C	C	T	C	G	C	G	C	G	A	A	T	C	C	A	A	G	T	T	T	G	C	C	G	G	T	C
T	C	T	C	T	T	C	T	A	T	C	C	T	C	T	T	T	T	T	T	G	A	T	T	T	A	T	T	T	C	T	A	T	G	G	T	T	T	T	T	C	C	G	T	T	T	T	T	A	T
A	T	A	A	C	A	G	C	A	A	A	A	A	A	C	G	A	C	C	G	T	T	C	C	C	G	C	A	G	A	C	T	A	T	C	C	C	A	A	A	A	T	C	A	C	C	A	A	T	C
A	T	A	C	A	A	G	A	T	T	C	C	A	C	A	C	A	A	A	C	C	G	A	A	A	T	A	T	C	T	A	G	A	A	A	A	A	A	A	T	C	A	A	T	A	A	T	T	A	A
T	A	T	G	C	T	C	C	C	A	G	G	T	G	C	A	T	C	C	A	G	G	C	C	C	G	C	A	A	G	C	G	T	T	T	C	C	T	T	A	G	A	T	A	C	C	A	A	A	C
T	G	T	C	G	T	T	G	T	A	C	C	T	C	G	C	T	G	G	T	T	C	G	G	G	C	G	A	T	C	G	C	T	A	G	G	G	T	T	A	C	A	G	A	G	G	A	A	T	G
A	T	A	A	C	A	G	C	G	T	A	A	A	A	C	T	A	C	C	G	T	A	C	C	C	A	C	T	G	T	C	A	A	A	C	C	C	A	A	T	A	C	C	T	C	C	T	T	T	C
A	G	A	G	A	A	C	A	T	T	G	G	A	G	A	C	A	A	A	C	G	C	A	A	A	C	A	T	C	T	A	C	A	T	T	A	A	A	A	T	G	G	T	T	A	A	T	T	A	A
T	C	T	T	G	T	A	G	G	A	T	T	T	T	G	A	T	G	G	T	A	T	G	G	G	T	G	A	T	A	G	T	T	T	T	G	G	T	T	A	T	A	T	A	G	G	A	A	A	G
A	A	A	A	T	A	T	T	T	A	A	A	A	A	T	C	A	T	T	T	C	T	T	T	T	C	T	A	T	G	T	T	A	A	A	T	T	A	A	A	A	A	A	A	T	T	A	A	T	T
A	C	A	T	A	A	G	A	G	T	T	T	A	T	A	G	A	A	A	A	A	G	A	A	A	A	A	T	A	T	A	G	A	A	G	A	A	A	A	T	T	C	G	T	A	A	T	T	A	A
C	T	C	A	T	C	C	T	G	A	A	A	C	A	T	C	C	T	T	G	G	T	T	T	T	C	T	A	G	G	T	T	C	T	T	T	T	C	C	A	A	T	T	A	T	T	A	A	A	T
T	C	T	A	A	T	T	A	C	A	A	A	T	A	A	A	T	A	A	T	G	G	A	A	A	G	A	A	T	C	A	G	T	A	G	A	A	T	T	A	A	T	G	A	A	A	A	A	C	A
A	A	A	T	A	A	T	A	T	C	T	T	A	T	A	G	A	A	A	G	A	G	A	A	A	C	A	C	G	A	A	G	A	A	C	A	A	A	A	C	T	T	C	C	A	A	C	C	T	A
A	C	A	T	T	A	A	T	G	T	T	T	A	T	T	T	A	T	T	C	C	C	T	T	T	A	T	T	C	C	T	C	A	C	A	T	T	A	A	T	T	A	A	T	T	T	T	T	A	T
T	G	T	A	T	T	G	T	T	A	A	A	T	A	T	A	T	T	T	A	A	T	T	T	T	G	T	A	A	T	T	T	T	T	C	T	T	T	T	A	A	A	C	A	T	T	A	A	A	T
T	C	T	A	A	T	T	A	C	A	A	A	T	A	A	T	T	A	A	C	C	T	A	A	A	T	A	A	C	C	A	T	T	A	T	A	A	T	T	A	A	A	T	A	A	A	A	A	T	A
A	A	A	T	A	A	G	A	A	T	T	T	A	T	A	A	A	A	A	T	G	A	A	A	A	A	A	T	T	A	A	A	A	A	C	A	A	A	A	T	T	A	C	T	A	A	T	T	T	A
C	G	C	A	T	C	C	T	C	T	A	A	C	A	T	A	C	T	T	C	A	G	T	T	T	T	T	T	C	C	T	G	C	T	A	T	T	C	C	T	A	T	A	T	T	T	T	T	A	T
T	T	T	A	A	T	A	A	T	A	A	A	T	A	A	T	T	A	A	A	G	T	A	A	A	A	A	A	A	G	A	T	T	T	C	A	A	T	T	A	A	C	C	A	A	A	A	A	C	A
G	A	G	C	A	G	C	A	C	C	C	C	G	C	A	T	G	A	A	C	T	A	A	A	A	A	A	C	C	C	A	A	G	A	G	A	A	G	G	C	C	T	G	C	A	A	C	C	T	A
T	T	T	T	C	T	T	C	G	T	T	T	T	T	C	A	T	C	C	G	A	G	C	C	C	T	C	T	G	A	C	G	T	C	C	C	C	T	T	T	T	G	C	T	C	C	T	T	G	C
C	A	C	A	T	C	C	T	G	G	A	A	C	A	T	A	C	T	T	C	A	A	T	T	T	T	T	G	C	G	T	A	C	T	A	T	T	C	C	G	A	T	A	G	T	T	G	G	T	T
G	A	G	A	A	G	A	A	C	T	A	A	G	A	A	T	G	A	A	A	C	A	A	A	A	A	A	T	A	T	A	A	G	G	G	A	A	G	G	T	A	G	G	T	A	A	T	T	C	A
T	T	T	T	A	T	C	A	T	C	T	T	T	T	A	A	T	A	A	G	T	G	A	A	A	A	A	C	G	A	A	G	T	T	T	A	A	T	T	C	T	T	T	C	A	A	C	C	G	A
T	T	T	T	T	T	G	T	G	G	T	T	T	T	T	A	T	T	T	T	C	T	T	T	T	T	T	G	T	T	T	T	T	C	A	T	T	T	T	G	T	G	A	G	T	T	G	G	T	T
G	A	G	A	T	G	C	T	C	T	A	A	G	A	T	C	G	T	T	A	G	T	T	T	T	A	T	T	A	A	T	T	G	G	T	T	T	G	G	T	A	G	T	T	T	T	T	T	T	T
A	A	A	C	A	A	A	A	A	T	C	C	A	C	A	T	A	A	A	T	T	G	A	A	A	A	A	T	T	A	A	G	A	T	A	A	A	A	A	T	C	C	A	T	A	A	T	T	G	A
C	T	C	T	C	C	G	C	T	G	T	T	C	T	C	A	C	C	C	A	C	A	C	C	C	C	C	G	A	T	C	A	C	T	A	C	C	C	C	G	T	T	A	G	C	C	G	G	A	C
A	A	A	G	T	A	T	T	G	A	G	G	A	G	T	A	A	T	T	A	T	A	T	T	T	T	T	A	A	T	T	A	A	G	T	T	T	A	A	A	G	G	T	A	T	T	A	A	C	T
G	A	G	T	G	G	A	G	C	C	T	T	G	T	G	T	G	G	G	T	A	A	G	G	G	A	G	C	T	A	G	A	G	A	T	G	G	G	G	C	T	T	T	C	G	G	C	C	A	G
G	C	G	C	T	G	T	T	T	A	C	C	G	C	T	T	G	T	T	T	T	A	T	T	T	A	T	A	T	A	T	A	G	C	A	T	T	G	G	A	C	C	A	A	T	T	A	A	G	T
A	T	A	G	C	A	A	C	T	G	G	G	A	G	C	A	A	C	C	A	C	A	C	C	C	T	C	G	A	T	C	A	A	A	A	C	C	A	A	G	G	A	A	G	C	C	G	G	G	C
C	A	C	T	G	C	A	G	A	G	T	T	C	T	G	C	C	G	G	A	T	G	G	G	G	T	G	G	A	A	G	G	C	G	T	G	G	C	C	G	T	C	T	G	G	G	G	G	A	G
A	A	A	T	T	A	T	T	G	A	T	T	A	T	T	T	A	T	T	T	T	G	T	T	T	A	T	A	T	A	T	G	A	G	A	T	T	A	A	A	T	T	A	A	T	T	A	A	C	T
C	T	C	G	T	C	T	T	T	C	G	G	C	G	T	G	C	T	T	A	C	C	T	T	T	C	T	C	A	C	T	C	C	A	A	T	T	C	C	C	G	C	A	C	T	T	C	C	A	T
G	T	G	A	G	G	A	G	G	A	A	A	G	A	G	T	G	G	G	A	T	G	G	G	G	T	G	A	A	T	G	G	G	C	C	G	G	G	G	A	A	G	C	A	G	G	A	A	C	G
A	A	A	C	A	A	A	A	C	C	C	C	A	C	A	C	A	A	A	C	G	T	A	A	A	G	A	C	C	A	A	T	A	A	T	A	A	A	A	C	C	G	T	C	A	A	C	C	G	A
G	C	G	A	C	G	T	C	A	G	A	A	G	A	C	G	G	C	C	T	C	T	C	C	C	T	C	G	T	A	C	T	G	C	A	C	C	G	G	G	A	C	A	G	C	C	G	G	A	C
T	T	T	G	A	T	A	A	C	A	G	G	T	G	A	T	T	A	A	A	A	T	A	A	A	C	A	A	A	T	A	T	T	G	A	A	A	T	T	A	G	T	A	A	A	A	A	A	G	A
A	G	A	G	G	A	A	G	T	G	G	G	A	G	G	T	A	G	G	A	G	T	G	G	G	G	G	G	A	T	G	T	A	A	T	G	G	A	A	G	G	G	T	G	G	G	G	G	T	G
A	T	A	A	G	A	C	G	C	T	A	A	A	A	G	G	A	G	G	T	G	G	G	G	G	T	G	T	T	A	G	G	A	G	T	G	G	A	A	T	A	C	T	T	G	G	T	T	A	G
C	C	C	C	A	C	T	A	A	A	C	C	C	C	A	A	C	A	A	T	C	C	A	A	A	T	A	A	T	C	A	C	C	T	A	A	A	C	C	A	C	A	A	A	A	A	A	A	A	A
T	G	T	A	C	T	A	C	C	A	A	A	T	A	C	C	T	C	C	A	T	C	C	C	C	G	C	A	A	T	C	C	T	A	C	C	C	T	T	A	A	T	C	A	C	C	A	A	C	C
C	T	C	C	A	C	A	A	G	C	C	C	C	C	A	A	C	A	A	C	G	T	A	A	A	A	A	C	C	G	A	T	C	A	T	A	A	C	C	C	C	G	T	C	A	A	C	C	T	A
G	T	G	G	C	G	T	C	C	T	G	G	G	G	C	G	G	C	C	T	C	C	C	C	C	C	C	T	T	T	C	C	G	C	G	C	C	G	G	T	G	C	G	T	C	C	T	T	C	C
T	G	T	A	G	T	T	G	A	C	A	A	T	A	G	G	T	G	G	G	T	A	G	G	G	A	G	C	G	C	G	A	T	T	T	G	G	T	T	C	A	T	T	C	G	G	C	C	G	G
C	A	C	G	A	C	A	A	G	G	G	G	C	G	A	A	C	A	A	T	T	A	A	A	A	G	A	G	T	G	A	A	C	C	C	A	A	C	C	G	G	T	C	G	A	A	G	G	T	A
T	C	T	T	G	T	C	G	T	T	T	T	T	T	G	C	T	G	G	C	A	C	G	G	G	G	G	T	C	T	G	C	T	G	G	G	G	T	T	T	T	A	G	T	G	G	T	T	C	G
A	A	A	A	T	A	T	T	A	C	A	A	A	A	T	A	A	T	T	G	C	T	T	T	T	A	T	C	G	T	T	T	A	T	T	T	T	A	A	C	A	G	T	C	T	T	C	C	T	T
T	G	T	A	A	T	G	A	T	T	A	A	T	A	A	C	T	A	A	T	G	T	A	A	A	C	A	T	T	G	A	T	T	C	T	A	A	T	T	T	A	T	T	T	A	A	T	T	A	A
C	G	C	C	A	C	T	A	A	A	C	C	C	C	A	G	C	A	A	T	G	G	A	A	A	A	A	A	T	A	A	G	C	T	G	A	A	C	C	A	C	G	G	A	A	A	A	A	T	A
T	A	T	T	C	T	C	C	A	T	T	T	T	T	C	A	T	C	C	G	T	A	C	C	C	C	C	T	G	C	C	A	T	A	A	C	C	T	T	T	T	C	A	T	C	C	T	T	C	C
T	C	T	C	T	T	G	T	T	C	C	C	T	C	T	G	T	T	T	A	T	A	T	T	T	G	T	C	A	A	T	A	T	T	C	T	T	T	T	C	C	A	C	C	T	T	C	C	T	T
C	A	C	G	C	C	T	C	T	T	G	G	C	G	C	T	C	C	C	C	T	C	C	C	C	A	C	T	C	G	C	C	C	C	A	C	C	C	C	T	G	C	A	T	C	C	T	T	T	C
T	C	T	T	G	T	T	G	A	T	T	T	T	T	G	A	T	G	G	A	C	A	G	G	G	G	G	T	A	G	G	A	T	T	G	G	G	T	T	T	T	T	G	T	G	G	T	T	C	G
G	G	G	C	T	G	G	T	A	C	C	C	G	C	T	A	G	T	T	G	G	G	T	T	T	T	T	C	G	A	T	G	G	T	G	T	T	G	G	C	C	C	G	C	T	T	C	C	T	T
C	A	C	T	C	C	A	C	T	T	T	T	C	T	C	C	C	C	C	G	T	C	C	C	C	A	C	T	G	C	C	C	C	C	A	C	C	C	C	T	T	A	A	T	C	C	T	T	G	C
A	G	A	A	T	A	C	T	A	G	A	A	A	A	T	T	A	T	T	A	C	C	T	T	T	A	T	G	A	A	T	C	A	T	C	T	T	A	A	G	A	C	C	G	T	T	G	G	C	T
G	T	G	T	A	G	A	A	A	C	T	T	G	T	A	C	G	A	A	C	C	C	A	A	A	C	A	C	C	C	A	C	G	G	A	A	A	G	G	C	T	G	A	C	A	A	C	C	A	A
G	A	G	C	T	G	G	T	C	A	C	C	G	C	T	G	G	T	T	A	G	T	T	T	T	T	T	A	A	G	T	T	G	C	C	T	T	G	G	A	C	C	C	A	T	T	A	A	G	T
C	A	C	T	C	C	G	C	T	G	T	T	C	T	C	T	C	C	C	C	T	A	C	C	C	C	C	G	C	A	C	A	C	A	G	C	C	C	C	G	T	A	G	G	C	C	G	G	G	C
T	C	T	T	T	T	A	T	A	G	T	T	T	T	T	C	T	T	T	G	G	T	T	T	T	G	T	G	G	G	T	T	T	G	A	T	T	T	T	G	T	G	A	G	T	T	G	G	C	T
G	T	G	C	T	G	C	T	A	C	C	C	G	C	T	T	G	T	T	A	T	G	T	T	T	T	T	C	A	T	T	G	G	G	G	T	T	G	G	C	C	T	G	C	T	T	C	C	T	T
C	C	C	T	C	C	A	C	T	T	T	T	C	T	C	A	C	C	C	G	T	T	C	C	C	C	C	T	G	A	C	T	C	C	T	C	C	C	C	T	T	A	T	T	C	C	T	T	G	C
T	G	T	G	T	T	C	T	T	G	G	G	T	G	T	T	T	T	T	T	G	G	T	T	T	T	T	G	T	A	T	G	T	T	A	T	T	T	T	G	G	T	A	G	T	T	G	G	C	T
T	T	T	C	G	T	G	G	A	C	C	C	T	C	G	C	T	G	G	A	C	T	G	G	G	A	G	C	A	C	G	T	T	G	A	G	G	T	T	C	C	A	A	C	G	G	C	C	T	G
A	C	A	A	C	A	A	C	C	T	A	A	A	A	C	T	A	C	C	A	A	T	C	C	C	T	C	T	A	T	C	T	A	C	C	C	C	A	A	T	A	A	C	T	C	C	T	T	T	C
C	T	C	G	A	C	G	A	T	T	G	G	C	G	A	T	C	A	A	C	G	C	A	A	A	C	A	T	C	C	A	C	C	T	T	A	A	C	C	T	G	T	T	T	A	A	T	T	A	A
G	A	G	G	G	G	T	G	G	A	G	G	G	G	G	C	G	G	G	T	C	A	G	G	G	T	G	A	T	G	G	A	G	T	C	G	G	G	G	A	G	T	C	A	G	G	A	A	C	G
G	T	G	C	G	G	A	G	T	C	C	C	G	C	G	T	G	G	G	C	C	T	G	G	G	T	G	C	C	T	G	T	G	A	G	G	G	G	G	C	C	A	G	C	G	G	C	C	G	G
T	C	T	T	C	T	A	C	C	G	T	T	T	T	C	G	T	C	C	G	G	C	C	C	C	C	C	G	G	C	C	C	T	C	T	C	C	T	T	G	T	A	T	G	C	C	G	G	G	C
T	T	T	G	T	T	C	T	G	G	G	G	T	G	T	C	T	T	T	T	A	A	T	T	T	T	T	G	T	T	T	A	T	G	C	T	T	T	T	G	G	T	C	G	T	T	G	G	T	T
T	T	T	C	G	T	T	G	T	T	C	C	T	C	G	A	T	G	G	C	T	A	G	G	G	G	G	T	C	A	G	A	T	G	T	G	G	T	T	T	C	A	T	T	G	G	T	T	T	G
C	C	C	T	C	C	C	C	T	T	T	T	C	T	C	G	C	C	C	T	C	A	C	C	C	C	C	T	T	T	C	A	C	T	A	C	C	C	C	T	T	A	A	T	C	C	T	T	T	C
G	T	G	T	T	G	G	T	G	T	T	T	G	T	T	G	G	T	T	A	A	C	T	T	T	A	T	T	A	C	T	C	G	T	T	T	T	G	G	T	T	C	T	T	T	T	T	T	C	T
T	G	T	A	T	T	T	T	A	C	A	A	T	A	T	C	T	T	T	T	T	G	T	T	T	G	T	C	T	T	T	G	T	T	C	T	T	T	T	C	A	T	C	C	T	T	C	C	G	T
C	C	C	C	A	C	C	A	C	G	C	C	C	C	A	T	C	A	A	C	C	T	A	A	A	G	A	G	C	T	A	T	C	C	T	A	A	C	C	G	C	A	T	G	A	A	G	G	T	A
C	A	C	G	C	C	T	C	A	T	G	G	C	G	C	G	C	C	C	T	A	T	C	C	C	C	C	T	T	C	C	T	C	G	T	C	C	C	C	T	G	A	T	T	C	C	T	T	C	C
G	G	G	G	G	G	A	G	G	C	G	G	G	G	G	C	G	G	G	T	G	C	G	G	G	T	G	C	T	T	G	C	G	T	C	G	G	G	G	C	G	T	C	C	G	G	C	C	C	G
T	G	T	T	G	T	T	G	G	C	T	T	T	T	G	T	T	G	G	C	C	G	G	G	G	G	G	C	C	G	G	G	T	C	T	G	G	T	T	C	T	T	T	C	G	G	C	C	G	G
G	C	G	T	T	G	C	T	A	G	T	T	G	T	T	T	G	T	T	T	A	G	T	T	T	C	T	G	T	C	T	G	G	C	G	T	T	G	G	G	T	A	G	G	T	T	G	G	T	T
T	T	T	T	T	T	T	T	C	T	T	T	T	T	T	A	T	T	T	G	C	A	T	T	T	T	T	T	G	A	T	A	T	G	C	T	T	T	T	T	T	C	C	T	T	T	T	T	G	T
T	G	T	C	T	T	T	T	A	G	C	C	T	C	T	C	T	T	T	C	A	T	T	T	T	T	T	G	C	G	T	T	T	T	A	T	T	T	T	G	C	T	A	G	T	T	G	G	T	T
G	C	G	G	C	G	C	C	C	T	G	G	G	G	C	G	G	C	C	A	T	G	C	C	C	A	C	T	A	G	C	G	G	G	G	C	C	G	G	T	G	G	G	T	C	C	T	T	T	C
C	T	C	T	G	C	T	G	G	T	T	T	C	T	G	G	C	G	G	G	C	C	G	G	G	C	G	T	G	C	G	C	C	T	G	G	G	C	C	T	T	T	G	T	G	G	T	T	G	G
A	T	A	C	T	A	G	T	A	G	C	C	A	C	T	T	A	T	T	G	T	T	T	T	T	G	T	G	G	T	T	T	A	T	C	T	T	A	A	G	C	C	C	G	T	T	G	G	C	T
G	A	G	C	C	G	C	C	G	C	C	C	G	C	C	T	G	C	C	C	A	C	C	C	C	G	C	C	C	G	C	C	G	G	T	C	C	G	G	C	C	G	T	C	C	C	C	C	A	C
C	C	C	G	C	C	A	C	T	A	G	G	C	G	C	T	C	C	C	T	G	G	C	C	C	T	C	A	T	C	C	G	C	C	G	C	C	C	C	A	G	T	G	A	C	C	A	A	G	C
C	G	C	T	G	C	G	G	A	G	T	T	C	T	G	C	C	G	G	G	G	A	G	G	G	T	G	G	G	T	G	A	C	A	C	G	G	C	C	G	T	T	C	G	G	G	G	G	C	G
G	G	G	G	T	G	G	T	A	C	G	G	G	G	T	G	G	T	T	C	T	A	T	T	T	T	T	C	C	T	T	A	G	G	T	T	T	G	G	C	G	G	T	C	T	T	C	C	C	T
A	T	A	T	G	A	C	G	C	C	T	T	A	T	G	T	A	G	G	T	T	C	G	G	G	C	G	C	T	A	G	C	A	C	T	G	G	A	A	C	T	A	T	C	G	G	C	C	G	G
T	T	T	T	T	T	T	T	T	G	T	T	T	T	T	C	T	T	T	T	T	T	T	T	T	G	T	G	T	C	T	T	T	C	A	T	T	T	T	G	T	C	A	G	T	T	G	G	A	T
C	T	C	G	T	C	G	T	C	A	G	G	C	G	T	C	C	T	T	A	T	G	T	T	T	T	T	A	A	G	T	G	C	G	C	T	T	C	C	A	G	A	C	A	T	T	A	A	T	T
A	C	A	C	G	A	C	G	G	T	C	C	A	C	G	G	A	G	G	C	G	C	G	G	G	C	G	T	C	G	G	C	A	A	G	G	G	A	A	T	C	G	G	T	G	G	T	T	C	G
T	G	T	A	C	T	T	C	T	C	A	A	T	A	C	T	T	C	C	G	T	A	C	C	C	C	C	C	G	T	C	A	T	T	G	C	C	T	T	C	A	G	G	C	C	C	C	C	A	C
C	T	C	G	A	C	T	A	C	A	G	G	C	G	A	G	C	A	A	G	C	C	A	A	A	G	A	A	G	T	A	C	C	C	T	A	A	C	C	A	G	A	T	A	A	A	A	A	T	A
A	C	A	C	G	A	A	G	T	T	C	C	A	C	G	T	A	G	G	T	C	C	G	G	G	T	G	T	T	T	G	C	A	A	T	G	G	A	A	T	C	C	T	T	G	G	T	T	C	G
G	C	G	C	C	G	C	C	A	C	C	C	G	C	C	T	G	C	C	T	G	T	C	C	C	G	C	C	T	C	C	T	G	T	T	C	C	G	G	C	C	A	T	C	C	C	C	C	A	C
C	G	C	G	C	C	G	C	T	A	G	G	C	G	C	G	C	C	C	T	G	C	C	C	C	T	C	A	T	G	C	C	C	C	C	C	C	C	C	A	G	C	C	A	C	C	A	A	G	C
A	T	A	A	T	A	G	G	C	G	A	A	A	A	G	C	A	G	G	C	G	A	G	G	G	T	G	G	C	T	G	A	A	A	G	G	G	A	A	G	A	G	G	G	G	G	G	G	C	G
C	G	C	T	A	C	T	A	T	C	T	T	C	T	A	A	C	A	A	G	T	T	A	A	A	G	A	C	G	C	A	T	C	G	T	A	A	C	C	C	T	A	T	C	A	A	C	C	A	A
A	T	A	C	T	A	T	T	T	A	C	C	A	C	T	G	A	T	T	T	G	G	T	T	T	C	T	A	T	C	T	G	A	C	C	T	T	A	A	A	C	G	C	A	T	T	A	A	C	T
T	T	T	A	C	T	T	C	C	C	A	A	T	A	C	C	T	C	C	C	T	G	C	C	C	A	C	C	C	G	C	G	T	A	C	C	C	T	T	C	A	T	C	C	C	C	C	C	A	C
C	G	C	T	A	C	C	A	T	A	T	T	C	T	A	C	C	A	A	C	G	T	A	A	A	G	A	A	C	T	A	T	C	C	G	A	A	C	C	A	T	A	G	A	A	A	A	A	T	A
T	C	T	C	T	T	G	T	G	T	C	C	T	C	T	G	T	T	T	G	A	C	T	T	T	C	T	T	G	G	T	C	T	A	T	T	T	T	T	T	C	A	T	T	T	T	T	T	C	T
A	A	A	A	C	A	T	C	C	C	A	A	A	A	C	A	A	C	C	T	C	A	C	C	C	C	C	C	T	T	C	A	A	T	G	C	C	A	A	C	A	C	G	C	C	C	C	C	T	C
G	G	G	G	A	G	C	A	A	T	G	G	G	G	A	T	G	A	A	G	C	T	A	A	A	G	A	T	G	T	A	T	G	C	T	A	A	G	G	T	G	T	T	T	A	A	T	T	A	A
G	C	G	C	G	G	C	G	G	A	C	C	G	C	G	C	G	G	G	T	G	G	G	G	G	A	G	A	T	G	G	G	G	T	T	G	G	G	G	A	C	C	T	A	G	G	A	A	G	G
T	C	T	A	C	T	G	C	G	G	A	A	T	A	C	A	T	C	C	T	A	T	C	C	C	T	C	G	T	C	C	T	T	A	G	C	C	T	T	G	A	G	G	G	C	C	G	G	G	C
T	G	T	C	A	T	T	A	C	G	C	C	T	C	A	T	T	A	A	G	A	T	A	A	A	C	A	G	G	A	A	T	T	G	C	A	A	T	T	G	C	T	C	G	A	A	G	G	T	A
T	A	T	A	C	T	G	C	T	T	A	A	T	A	C	C	T	C	C	C	A	A	C	C	C	A	C	T	C	G	C	A	T	G	A	C	C	T	T	T	A	C	A	T	C	C	T	T	T	C
T	T	T	T	A	T	T	A	G	T	T	T	T	T	A	A	T	A	A	A	G	T	A	A	A	T	A	T	A	C	A	T	T	T	G	A	A	T	T	T	T	T	G	T	A	A	T	T	T	A
G	C	G	C	T	G	T	T	C	T	C	C	G	C	T	G	G	T	T	G	G	G	T	T	T	C	T	T	G	C	T	G	G	T	C	T	T	G	G	T	C	A	C	T	T	T	T	T	T	T
T	A	T	T	C	T	G	C	T	T	T	T	T	T	C	C	T	C	C	C	T	G	C	C	C	A	C	T	C	G	C	G	T	T	C	C	C	T	T	T	T	T	C	T	C	C	T	T	G	C
C	T	C	A	T	C	C	T	T	G	A	A	C	A	T	A	C	T	T	C	A	T	T	T	T	G	T	G	C	A	T	T	C	T	G	T	T	C	C	G	A	C	G	G	T	T	G	G	T	T
C	C	C	G	A	C	A	A	A	T	G	G	C	G	A	C	C	A	A	G	A	T	A	A	A	C	A	T	G	T	A	T	C	G	A	A	A	C	C	T	G	T	A	T	A	A	T	T	C	A
G	A	G	G	G	G	G	G	C	C	G	G	G	G	G	A	G	G	G	A	G	G	G	G	G	A	G	C	A	C	G	G	G	T	T	G	G	G	G	C	G	T	T	C	G	G	C	C	C	G
G	G	G	T	G	G	C	G	G	C	T	T	G	T	G	T	G	G	G	T	A	A	G	G	G	C	G	C	T	A	G	A	G	C	C	G	G	G	G	C	T	C	C	C	G	G	C	C	G	G
G	C	G	T	T	G	C	T	G	G	T	T	G	T	T	C	G	T	T	C	T	G	T	T	T	A	T	G	C	T	T	G	G	C	A	T	T	G	G	G	T	T	A	G	T	T	G	G	G	T
T	A	T	T	T	T	G	T	T	G	T	T	T	T	T	T	T	T	T	A	G	C	T	T	T	T	T	G	A	C	T	C	T	G	T	T	T	T	T	G	T	G	T	G	T	T	G	G	G	T
G	C	G	T	T	G	A	T	T	G	T	T	G	T	T	A	G	T	T	T	G	T	T	T	T	C	T	G	T	A	T	T	G	G	C	T	T	G	G	G	T	C	C	G	T	T	G	G	T	T
T	A	T	G	T	T	T	T	T	T	G	G	T	G	T	G	T	T	T	C	A	G	T	T	T	T	T	T	C	G	T	G	T	G	A	T	T	T	T	T	G	A	A	T	T	T	T	T	G	T
G	T	G	T	G	G	C	G	C	G	T	T	G	T	G	G	G	G	G	A	G	G	G	G	G	A	G	G	A	C	G	G	G	T	G	G	G	G	G	G	T	G	G	G	G	G	G	G	T	G
A	C	A	C	T	A	A	T	G	T	C	C	A	C	T	T	A	T	T	G	A	T	T	T	T	G	T	T	G	A	T	T	A	G	C	T	T	A	A	T	C	G	C	T	T	T	T	T	G	T
C	T	C	C	C	C	T	C	T	G	C	C	C	C	C	T	C	C	C	C	G	A	C	C	C	G	C	G	C	C	C	A	C	T	A	C	C	C	C	G	C	C	A	G	C	C	G	G	A	C
C	A	C	G	C	C	C	C	C	A	G	G	C	G	C	T	C	C	C	A	C	G	C	C	C	T	C	A	A	A	C	G	C	G	C	C	T	C	C	A	G	T	C	A	C	C	A	A	C	C
G	G	G	G	G	G	A	G	C	C	G	G	G	G	G	T	G	G	G	C	C	C	G	G	G	T	G	C	C	T	G	C	G	A	A	G	G	G	G	C	G	G	A	C	G	G	C	C	C	G
A	G	A	G	G	A	G	G	G	C	G	G	A	G	G	G	A	G	G	A	T	A	G	G	G	T	G	C	A	C	G	A	A	C	T	G	G	A	A	C	G	C	T	C	G	G	C	C	G	G
A	T	A	T	G	A	C	G	T	G	T	T	A	T	G	T	A	G	G	T	T	G	G	G	G	C	G	G	T	T	G	G	A	C	C	G	G	A	A	G	T	T	C	G	G	G	G	G	A	G
A	T	A	G	T	A	A	T	G	A	G	G	A	G	T	C	A	T	T	C	G	A	T	T	T	G	T	A	C	A	T	A	A	G	T	T	T	A	A	A	G	T	T	A	T	T	A	A	A	T
G	T	G	T	G	G	C	G	T	A	T	T	G	T	G	C	G	G	G	T	T	A	G	G	G	T	G	A	T	G	G	A	G	A	A	G	G	G	G	A	T	A	A	A	G	G	A	A	A	G
G	T	G	G	T	G	A	T	T	A	G	G	G	G	T	G	G	T	T	A	C	C	T	T	T	C	T	A	A	G	T	C	G	A	G	T	T	G	G	A	G	C	G	A	T	T	A	A	G	T
T	G	T	A	G	T	T	G	G	G	A	A	T	A	G	G	T	G	G	G	C	T	G	G	G	C	G	G	G	T	G	T	T	A	G	G	G	T	T	G	A	G	G	G	G	G	G	G	G	G
A	T	A	C	A	A	C	A	C	G	C	C	A	C	A	G	A	A	A	G	C	C	A	A	A	G	A	G	G	T	A	C	A	G	T	A	A	A	A	G	C	G	T	G	A	A	G	G	T	A
A	C	A	C	C	A	T	C	A	T	C	C	A	C	C	T	A	C	C	T	T	G	C	C	C	G	C	T	T	T	C	G	A	G	T	C	C	A	A	T	C	T	T	T	C	C	T	T	A	C
G	C	G	G	C	G	A	C	G	A	G	G	G	G	C	G	G	C	C	T	G	A	C	C	C	G	C	A	T	T	C	A	G	T	T	C	C	G	G	A	G	T	T	A	C	C	A	A	A	C
A	G	A	A	G	A	G	G	C	A	A	A	A	A	G	T	A	G	G	T	G	A	G	G	G	T	G	A	T	G	G	A	A	A	T	G	G	A	A	A	A	T	C	A	G	G	A	A	G	G
T	G	T	A	A	T	G	A	C	G	A	A	T	A	A	G	T	A	A	C	T	G	A	A	A	G	A	G	T	T	A	G	T	A	G	A	A	T	T	G	A	C	G	G	A	A	G	G	A	A
G	G	G	A	A	G	T	A	G	A	A	A	G	A	A	A	G	A	A	G	T	G	A	A	A	T	A	A	G	C	A	G	G	G	T	A	A	G	G	A	A	G	T	A	A	A	A	A	T	A
G	T	G	G	A	G	T	A	A	T	G	G	G	G	A	C	G	A	A	T	T	C	A	A	A	G	A	T	T	C	A	C	G	A	C	A	A	G	G	T	G	T	C	T	A	A	T	T	G	A
A	G	A	G	G	A	T	G	T	G	G	G	A	G	G	C	A	G	G	C	C	A	G	G	G	A	G	G	C	G	G	A	A	T	C	G	G	A	A	G	G	C	C	G	G	G	G	G	G	G
G	T	G	T	G	G	T	G	C	G	T	T	G	T	G	G	G	G	G	C	A	T	G	G	G	C	G	G	C	G	G	T	G	G	G	G	G	G	G	G	T	C	G	G	G	G	G	G	A	G
A	G	A	A	T	A	G	T	A	A	A	A	A	A	T	A	A	T	T	G	A	T	T	T	T	C	T	A	G	G	T	T	A	G	G	T	T	A	A	A	A	G	G	A	T	T	A	A	G	T
G	A	G	A	A	G	T	A	T	G	A	A	G	A	A	A	G	A	A	G	C	C	A	A	A	G	A	G	G	T	A	C	G	A	G	A	A	G	G	G	A	T	G	G	A	A	G	G	A	A
C	C	C	G	A	C	C	A	C	A	G	G	C	G	A	A	C	A	A	G	G	A	A	A	A	A	A	A	G	G	A	A	C	G	T	A	A	C	C	A	G	G	T	A	A	A	A	A	G	A
C	C	C	A	G	C	C	G	A	G	A	A	C	A	G	G	C	G	G	T	A	G	G	G	G	A	G	G	T	T	G	G	C	A	G	G	G	C	C	G	A	T	G	G	G	G	G	G	T	G
T	G	T	T	A	T	G	A	G	C	T	T	T	T	A	G	T	A	A	G	G	T	A	A	A	A	A	C	G	G	A	T	T	G	T	A	A	T	T	C	T	T	T	C	A	A	C	C	C	A
T	A	T	G	T	T	G	T	C	C	G	G	T	G	T	T	T	T	T	T	A	A	T	T	T	G	T	C	T	A	T	A	T	C	G	T	T	T	T	C	G	G	G	C	T	T	C	C	T	T
G	A	G	G	G	G	G	G	A	T	G	G	G	G	G	A	G	G	G	G	A	C	G	G	G	G	G	T	G	C	G	C	G	C	A	G	G	G	G	T	G	C	A	T	G	G	T	T	T	G
T	A	T	A	G	T	T	G	C	T	A	A	T	A	G	A	T	G	G	A	A	G	G	G	G	T	G	T	A	C	G	G	T	T	C	G	G	T	T	T	A	A	C	T	G	G	T	T	G	G
C	G	C	G	A	C	G	A	A	G	G	G	C	G	A	G	C	A	A	C	A	G	A	A	A	A	A	G	C	G	A	G	C	T	C	A	A	C	C	G	G	G	C	G	A	A	G	G	T	A
C	G	C	A	G	C	T	G	T	T	A	A	C	A	G	A	C	G	G	C	C	T	G	G	G	A	G	T	C	A	G	T	C	G	G	G	G	C	C	T	A	C	G	T	G	G	T	T	C	G
C	T	C	G	A	C	G	A	C	C	G	G	C	G	A	T	C	A	A	G	A	C	A	A	A	G	A	C	G	A	A	C	C	T	A	A	A	C	C	C	G	C	A	C	A	A	C	C	C	A
T	A	T	C	G	T	A	G	T	C	C	C	T	C	G	G	T	G	G	A	C	G	G	G	G	A	G	C	A	A	G	G	T	C	A	G	G	T	T	C	C	G	A	C	G	G	C	C	C	G
G	A	G	C	C	G	C	C	A	C	C	C	G	C	C	G	G	C	C	A	A	T	C	C	C	T	C	C	A	G	C	T	G	C	A	C	C	G	G	C	C	A	A	C	C	C	C	C	T	C
G	G	G	T	C	G	C	C	G	T	T	T	G	T	C	A	G	C	C	A	C	A	C	C	C	G	C	T	A	G	C	A	G	C	G	C	C	G	G	T	T	T	G	T	C	C	T	T	G	C
T	A	T	T	T	T	G	T	G	G	T	T	T	T	T	G	T	T	T	G	G	G	T	T	T	G	T	G	G	T	T	G	T	T	G	T	T	T	T	G	T	C	G	G	T	T	G	G	G	T
T	T	T	G	T	T	A	T	T	G	G	G	T	G	T	A	T	T	T	G	T	T	T	T	T	A	T	G	G	A	T	T	T	G	T	T	T	T	T	G	G	A	T	G	T	T	G	G	T	T
T	G	T	T	G	T	A	G	T	T	T	T	T	T	G	G	T	G	G	T	C	G	G	G	G	G	G	T	T	A	G	G	T	G	A	G	G	T	T	T	T	T	A	T	G	G	T	T	T	G
C	G	C	C	T	C	A	T	T	T	C	C	C	C	T	C	C	T	T	A	C	G	T	T	T	A	T	T	A	G	T	G	C	T	A	T	T	C	C	T	C	C	A	T	T	T	T	T	T	T
A	A	A	C	C	A	G	C	T	T	C	C	A	C	C	C	A	C	C	A	A	T	C	C	C	G	C	T	A	A	C	T	A	T	G	C	C	A	A	T	C	A	G	T	C	C	T	T	C	C
A	G	A	C	C	A	G	C	G	C	C	C	A	C	C	T	A	C	C	G	A	G	C	C	C	C	C	C	G	T	C	G	A	T	A	C	C	A	A	C	C	G	A	C	C	C	C	C	A	C
C	A	C	T	C	C	T	C	T	A	T	T	C	T	C	T	C	C	C	A	C	A	C	C	C	C	C	A	A	G	C	A	C	C	T	C	C	C	C	A	T	C	T	A	C	C	A	A	A	C
G	G	G	G	T	G	A	T	C	A	G	G	G	G	T	G	G	T	T	T	T	G	T	T	T	T	T	A	T	G	T	G	G	A	G	T	T	G	G	A	G	A	G	A	T	T	A	A	C	T
A	C	A	G	G	A	A	G	C	C	G	G	A	G	G	T	A	G	G	G	C	A	G	G	G	T	G	C	G	A	G	A	A	A	G	G	G	A	A	C	G	C	G	C	G	G	C	C	G	G
G	C	G	T	G	G	G	G	G	G	T	T	G	T	G	C	G	G	G	G	A	C	G	G	G	G	G	G	G	G	G	C	G	C	A	G	G	G	G	G	T	A	A	G	G	G	G	G	A	G
A	T	A	T	T	A	A	T	G	A	T	T	A	T	T	C	A	T	T	A	G	A	T	T	T	T	T	A	A	A	T	A	A	G	G	T	T	A	A	A	T	T	G	A	T	T	A	A	G	T
A	T	A	T	T	A	T	T	G	G	T	T	A	T	T	C	A	T	T	G	T	C	T	T	T	C	T	G	G	G	T	C	A	A	A	T	T	A	A	G	T	C	A	G	T	T	G	G	A	T
A	G	A	C	T	A	G	T	T	A	C	C	A	C	T	T	A	T	T	A	T	T	T	T	T	C	T	A	A	C	T	T	A	G	G	T	T	A	A	A	C	T	G	A	T	T	A	A	A	T
A	T	A	A	C	A	G	C	G	A	A	A	A	A	C	G	A	C	C	G	T	T	C	C	C	C	C	A	G	C	C	T	A	A	C	C	C	A	A	A	A	A	C	A	C	C	A	A	A	C
C	C	C	A	A	C	A	A	T	A	A	A	C	A	A	G	C	A	A	C	G	G	A	A	A	T	A	A	C	T	A	G	C	A	C	A	A	C	C	A	A	G	C	A	A	A	A	A	A	A
A	C	A	C	A	A	G	A	G	A	C	C	A	C	A	T	A	A	A	C	C	G	A	A	A	G	A	A	C	T	A	G	A	A	T	A	A	A	A	A	C	G	T	A	A	A	A	A	C	A
C	C	C	G	C	C	A	C	A	C	G	G	C	G	C	T	C	C	C	T	C	T	C	C	C	G	C	C	T	G	C	T	C	A	T	C	C	C	C	C	G	T	T	C	C	C	C	C	A	C
A	T	A	A	G	A	G	G	C	A	A	A	A	A	G	T	A	G	G	T	T	G	G	G	G	T	G	A	T	T	G	G	A	C	G	G	G	A	A	A	A	T	G	A	G	G	A	A	C	G
C	G	C	G	A	C	C	A	C	C	G	G	C	G	A	C	C	A	A	G	G	T	A	A	A	T	A	C	G	C	A	T	C	A	T	A	A	C	C	C	G	T	T	C	A	A	C	C	A	A
G	G	G	A	G	G	C	G	G	A	A	A	G	A	G	A	G	G	G	T	T	C	G	G	G	T	G	A	T	C	G	C	G	C	C	G	G	G	G	A	A	T	C	A	G	G	A	A	C	G
T	T	T	A	A	T	T	A	A	C	A	A	T	A	A	A	T	A	A	C	T	C	A	A	A	C	A	C	C	C	A	C	T	A	C	A	A	T	T	C	A	G	C	C	A	A	C	C	G	A
C	T	C	A	A	C	T	A	A	G	A	A	C	A	A	C	C	A	A	C	T	T	A	A	A	A	A	G	C	T	A	T	C	C	C	A	A	C	C	G	A	T	C	G	A	A	G	G	T	A
C	T	C	A	A	C	G	A	A	T	A	A	C	A	A	G	C	A	A	C	T	T	A	A	A	A	A	T	C	G	A	T	C	G	T	A	A	C	C	T	A	C	T	T	A	A	T	T	C	A
A	C	A	C	A	A	T	A	G	C	C	C	A	C	A	A	A	A	A	T	A	G	A	A	A	C	A	C	T	G	A	G	A	T	G	A	A	A	A	C	C	C	G	C	A	A	C	C	C	A
A	A	A	A	C	A	C	C	G	C	A	A	A	A	C	G	A	C	C	G	C	T	C	C	C	G	C	C	G	T	C	T	A	C	G	C	C	A	A	C	A	G	G	C	C	C	C	C	A	C
C	A	C	C	A	C	C	A	T	A	C	C	C	C	A	A	C	A	A	G	A	C	A	A	A	A	A	A	G	T	A	C	C	C	T	A	A	C	C	A	C	G	T	A	A	A	A	A	A	A
T	C	T	A	C	T	C	C	A	A	A	A	T	A	C	A	T	C	C	T	G	C	C	C	C	G	C	A	T	T	C	C	T	A	T	C	C	T	T	A	A	G	T	A	C	C	A	A	C	C
C	G	C	C	A	C	T	A	A	C	C	C	C	C	A	A	C	A	A	T	G	C	A	A	A	A	A	C	T	C	A	C	C	A	T	A	A	C	C	C	C	T	T	C	A	A	C	C	T	A
A	A	A	G	C	A	G	C	G	T	G	G	A	G	C	A	A	C	C	T	T	T	C	C	C	A	C	T	T	A	C	T	A	C	C	C	C	A	A	T	G	G	C	T	C	C	T	T	C	C
G	G	G	T	G	G	G	G	A	C	T	T	G	T	G	C	G	G	G	C	T	C	G	G	G	A	G	C	C	A	G	C	G	T	A	G	G	G	G	C	T	T	A	C	G	G	C	C	A	G
T	A	T	C	T	T	T	T	T	A	C	C	T	C	T	A	T	T	T	A	T	A	T	T	T	A	T	A	A	C	T	A	T	C	A	T	T	T	T	A	C	G	A	A	T	T	A	A	G	T
T	A	T	C	C	T	T	C	G	G	C	C	T	C	C	C	T	C	C	A	G	T	C	C	C	C	C	G	A	G	C	T	T	A	C	C	C	T	T	G	C	A	C	G	C	C	G	G	T	C
T	A	T	A	C	T	T	C	G	T	A	A	T	A	C	A	T	C	C	C	C	G	C	C	C	A	C	T	C	A	C	G	T	G	G	C	C	T	T	T	A	C	G	T	C	C	T	T	T	C
G	A	G	A	A	G	C	A	A	T	A	A	G	A	A	C	G	A	A	G	G	T	A	A	A	C	A	T	G	G	A	T	G	T	A	A	A	G	G	T	A	C	A	T	A	A	T	T	T	A
C	C	C	C	A	C	A	A	G	T	C	C	C	C	A	G	C	A	A	A	A	G	A	A	A	A	A	T	A	A	A	G	C	T	G	A	A	C	C	T	C	G	G	T	A	A	T	T	G	A
C	A	C	T	C	C	A	C	A	G	T	T	C	T	C	T	C	C	C	G	C	G	C	C	C	C	C	G	G	A	C	G	C	T	A	C	C	C	C	G	T	A	A	G	C	C	G	G	C	C
T	C	T	C	T	T	C	T	G	C	C	C	T	C	T	C	T	T	T	A	G	G	T	T	T	G	T	C	A	A	T	G	T	G	A	T	T	T	T	C	C	A	A	C	T	T	C	C	C	T
G	A	G	A	C	G	G	C	C	C	A	A	G	A	C	C	G	C	C	A	T	C	C	C	C	T	C	C	A	A	C	C	G	C	A	C	C	G	G	C	A	A	A	C	C	C	C	C	T	C
T	C	T	G	A	T	A	A	C	T	G	G	T	G	A	A	T	A	A	A	G	G	A	A	A	C	A	T	A	C	A	G	T	C	A	A	A	T	T	T	G	G	A	T	A	A	T	T	G	A
T	G	T	T	G	T	G	G	T	G	T	T	T	T	G	A	T	G	G	A	C	A	G	G	G	C	G	G	A	A	G	A	T	T	C	G	G	T	T	G	T	G	C	G	G	G	G	G	T	G
T	T	T	T	T	T	A	T	T	T	T	T	T	T	T	C	T	T	T	C	T	A	T	T	T	A	T	T	C	C	T	A	T	G	A	T	T	T	T	T	T	T	A	T	T	T	T	T	T	T
T	C	T	T	T	T	A	T	G	T	T	T	T	T	T	T	T	T	T	A	C	A	T	T	T	A	T	T	A	A	T	A	T	T	C	T	T	T	T	T	T	A	C	T	T	T	T	T	T	T
A	C	A	G	T	A	A	T	T	T	G	G	A	G	T	C	A	T	T	C	G	T	T	T	T	C	T	T	C	C	T	T	A	T	A	T	T	A	A	T	G	A	A	T	T	T	T	T	T	T
C	A	C	C	G	C	A	G	C	T	C	C	C	C	G	A	C	G	G	A	T	A	G	G	G	T	G	T	A	G	G	A	C	T	C	G	G	C	C	T	C	G	C	T	G	G	T	T	A	G
A	A	A	C	C	A	C	C	C	A	C	C	A	C	C	G	A	C	C	C	A	C	C	C	C	C	C	A	C	T	C	C	A	T	G	C	C	A	A	A	C	A	G	A	C	C	A	A	C	C
G	C	G	T	C	G	A	C	C	C	T	T	G	T	C	T	G	C	C	G	C	C	C	C	C	A	C	C	G	C	C	C	G	A	T	C	C	G	G	C	T	T	T	C	C	C	C	C	A	C
G	T	G	G	T	G	C	T	T	A	G	G	G	G	T	T	G	T	T	T	G	A	T	T	T	G	T	A	T	C	T	A	G	C	C	T	T	G	G	A	G	G	C	A	T	T	A	A	G	T
T	C	T	T	G	T	A	G	G	G	T	T	T	T	G	T	T	G	G	C	T	G	G	G	G	T	G	G	C	A	G	G	T	A	C	G	G	T	T	G	T	G	C	G	G	G	G	G	G	G
T	A	T	T	T	T	C	T	G	G	T	T	T	T	T	G	T	T	T	C	G	T	T	T	T	T	T	G	C	A	T	T	T	G	A	T	T	T	T	G	T	A	A	G	T	T	G	G	T	T
C	G	C	T	T	C	G	T	T	T	T	T	C	T	T	C	C	T	T	A	G	G	T	T	T	T	T	T	A	C	T	G	C	G	A	T	T	C	C	T	T	G	A	T	T	T	T	T	T	T
G	T	G	T	T	G	T	T	T	T	T	T	G	T	T	C	G	T	T	A	C	G	T	T	T	G	T	T	A	T	T	G	G	T	C	T	T	G	G	T	T	A	C	T	T	T	T	T	C	T
C	T	C	A	T	C	C	T	T	C	A	A	C	A	T	T	C	T	T	C	T	C	T	T	T	C	T	C	C	C	T	C	C	T	T	T	T	C	C	C	A	G	T	C	T	T	C	C	G	T
G	T	G	C	A	G	C	A	C	G	C	C	G	C	A	G	G	A	A	T	T	T	A	A	A	C	A	G	T	A	A	T	G	C	C	A	A	G	G	G	C	C	C	G	A	A	G	G	C	A
A	G	A	A	C	A	A	C	A	C	A	A	A	A	C	T	A	C	C	C	T	T	C	C	C	T	C	C	C	G	C	T	A	G	A	C	C	A	A	C	A	C	A	C	C	C	C	C	G	C
C	C	C	G	A	C	A	A	A	G	G	G	C	G	A	T	C	A	A	A	G	A	A	A	A	G	A	G	A	T	A	A	C	C	G	A	A	C	C	G	G	T	G	G	A	A	G	G	A	A
G	C	G	G	G	G	C	G	C	A	G	G	G	G	G	T	G	G	G	G	G	C	G	G	G	T	G	A	G	T	G	C	G	G	T	G	G	G	G	A	G	T	T	A	G	G	A	A	C	G
T	T	T	T	G	T	T	G	G	C	T	T	T	T	G	T	T	G	G	T	A	C	G	G	G	T	G	C	T	T	G	C	T	A	T	G	G	T	T	C	T	G	T	C	G	G	C	C	G	G
G	G	G	T	T	G	C	T	A	G	T	T	G	T	T	A	G	T	T	T	G	G	T	T	T	T	T	G	T	G	T	G	G	C	T	T	T	G	G	G	T	T	T	G	T	T	G	G	T	T
C	T	C	C	T	C	A	T	G	T	C	C	C	C	T	C	C	T	T	T	A	C	T	T	T	T	T	T	T	C	T	C	C	G	G	T	T	C	C	T	C	C	G	T	T	T	T	T	G	T
T	T	T	G	C	T	G	C	A	G	G	G	T	G	C	A	T	C	C	G	C	A	C	C	C	A	C	G	G	C	C	A	T	T	C	C	C	T	T	G	G	C	C	G	C	C	G	G	C	C
C	T	C	C	G	C	T	G	A	C	C	C	C	C	G	G	C	G	G	C	T	A	G	G	G	C	G	C	C	T	G	A	C	G	C	G	G	C	C	C	C	C	C	C	G	G	C	C	T	G
G	T	G	G	C	G	T	C	A	T	G	G	G	G	C	G	G	C	C	C	C	G	C	C	C	A	C	T	C	G	C	G	G	C	T	C	C	G	G	T	G	T	T	T	C	C	T	T	C	C
T	A	T	A	G	T	T	G	A	C	A	A	T	A	G	T	T	G	G	T	C	G	G	G	G	G	G	C	T	T	G	G	T	T	G	G	G	T	T	C	A	G	G	C	G	G	C	C	G	G
A	C	A	C	A	A	G	A	C	G	C	C	A	C	A	T	A	A	A	G	G	T	A	A	A	G	A	G	G	T	A	T	A	C	T	A	A	A	A	G	C	G	T	G	A	A	G	G	T	A
C	A	C	G	C	C	C	C	A	T	G	G	C	G	C	C	C	C	C	T	T	T	C	C	C	T	C	T	T	T	C	T	C	G	T	C	C	C	C	T	G	T	T	T	C	C	T	T	A	C
G	G	G	T	G	G	C	G	C	A	T	T	G	T	G	G	G	G	G	T	G	C	G	G	G	T	G	A	T	T	G	C	G	T	T	G	G	G	G	A	T	T	T	A	G	G	A	A	C	G
T	G	T	G	T	T	T	T	A	C	G	G	T	G	T	C	T	T	T	T	G	T	T	T	T	C	T	C	T	A	T	T	T	A	T	T	T	T	T	C	G	T	T	C	T	T	C	C	G	T
G	T	G	C	G	G	G	G	C	G	C	C	G	C	G	G	G	G	G	T	A	T	G	G	G	G	G	G	T	C	G	T	G	C	A	G	G	G	G	G	C	C	A	G	G	G	G	G	T	G
G	T	G	T	C	G	T	C	G	T	T	T	G	T	C	A	G	C	C	A	G	C	C	C	C	C	C	T	A	A	C	C	G	G	C	C	C	G	G	T	T	A	C	T	C	C	T	T	G	C
C	C	C	C	T	C	T	T	T	G	C	C	C	C	T	C	C	T	T	C	G	T	T	T	T	G	T	G	C	G	T	T	C	T	A	T	T	C	C	G	C	A	A	G	T	T	G	G	G	T
T	G	T	G	C	T	T	C	C	G	G	G	T	G	C	G	T	C	C	A	A	T	C	C	C	A	C	G	A	G	C	T	T	G	G	C	C	T	T	G	G	C	G	G	C	C	G	G	C	C
T	C	T	T	G	T	T	G	C	C	T	T	T	T	G	T	T	G	G	G	G	C	G	G	G	C	G	C	G	T	G	C	T	G	G	G	G	T	T	C	T	G	G	C	G	G	C	C	T	G
T	G	T	A	T	T	A	T	A	T	A	A	T	A	T	G	T	T	T	G	G	G	T	T	T	G	T	T	G	T	T	G	T	C	T	T	T	T	T	T	A	A	T	T	T	T	T	T	T	T
G	A	G	C	A	G	C	A	A	T	C	C	G	C	A	C	G	A	A	T	T	T	A	A	A	T	A	T	T	C	A	T	G	T	T	A	A	G	G	T	C	G	T	T	A	A	T	T	T	A
G	C	G	G	C	G	A	C	C	T	G	G	G	G	C	T	G	C	C	T	C	A	C	C	C	G	C	T	T	G	C	A	G	T	C	C	C	G	G	T	G	A	C	T	C	C	T	T	G	C
A	G	A	T	G	A	G	G	T	G	T	T	A	T	G	C	A	G	G	C	T	A	G	G	G	C	G	G	C	C	G	A	A	T	G	G	G	A	A	G	T	A	G	G	G	G	G	G	G	G
G	T	G	G	T	G	G	T	C	G	G	G	G	G	T	G	G	T	T	G	T	G	T	T	T	T	T	G	G	G	T	G	G	G	C	T	T	G	G	G	G	A	C	G	T	T	G	G	A	T
A	G	A	G	G	A	T	G	A	A	G	G	A	G	G	T	A	G	G	C	A	A	G	G	G	C	G	A	C	A	G	A	A	G	G	G	G	A	A	A	G	A	G	A	G	G	A	A	G	G
C	C	C	C	G	C	T	G	G	G	C	C	C	C	G	A	C	G	G	G	T	A	G	G	G	G	G	G	G	C	G	A	C	A	A	G	G	C	C	G	C	C	A	G	G	G	G	G	A	G
T	T	T	T	C	T	C	C	T	A	T	T	T	T	C	C	T	C	C	A	C	C	C	C	C	T	C	A	A	G	C	C	T	G	C	C	C	T	T	A	T	A	C	A	C	C	A	A	C	C
C	C	C	T	T	C	G	T	T	C	T	T	C	T	T	G	C	T	T	C	A	G	T	T	T	A	T	C	C	T	T	G	C	A	G	T	T	C	C	C	T	C	G	C	T	T	C	C	T	T
C	G	C	T	T	C	C	T	T	T	T	T	C	T	T	T	C	T	T	G	G	G	T	T	T	C	T	T	G	G	T	G	C	C	T	T	T	C	C	T	T	A	T	T	T	T	T	T	C	T
G	T	G	G	T	G	G	T	G	C	G	G	G	G	T	G	G	T	T	T	A	T	T	T	T	G	T	C	T	C	T	T	G	T	G	T	T	G	G	C	G	C	G	C	T	T	C	C	C	T
T	A	T	G	G	T	A	G	C	C	G	G	T	G	G	G	T	G	G	G	G	A	G	G	G	T	G	C	G	T	G	A	T	C	C	G	G	T	T	C	G	G	C	C	G	G	C	C	G	G
G	C	G	A	G	G	C	G	C	G	A	A	G	A	G	C	G	G	G	C	G	A	G	G	G	G	G	G	C	C	G	A	G	C	T	G	G	G	G	G	A	T	T	G	G	G	G	G	T	G
G	G	G	G	A	G	G	A	T	T	G	G	G	G	A	T	G	A	A	T	C	T	A	A	A	G	A	T	T	G	A	T	G	G	C	A	A	G	G	T	G	C	C	T	A	A	T	T	G	A
A	T	A	A	G	A	T	G	G	G	A	A	A	A	G	T	A	G	G	C	A	A	G	G	G	C	G	G	C	T	G	A	A	T	G	G	G	A	A	G	A	C	G	G	G	G	G	G	G	G
G	G	G	C	A	G	G	A	T	G	C	C	G	C	A	T	G	A	A	G	C	A	A	A	A	T	A	G	G	A	A	A	G	G	T	A	A	G	G	G	C	A	T	G	A	A	G	G	A	A
G	G	G	T	C	G	C	C	T	A	T	T	G	T	C	G	G	C	C	T	G	A	C	C	C	T	C	A	T	C	C	A	G	G	A	C	C	G	G	A	T	A	A	A	C	C	A	A	G	C
A	C	A	C	T	A	T	T	T	G	C	C	A	C	T	G	A	T	T	A	T	G	T	T	T	T	T	G	A	G	T	G	A	A	C	T	T	A	A	G	C	C	C	G	T	T	G	G	G	T
G	T	G	C	C	G	C	C	T	G	C	C	G	C	C	A	G	C	C	C	C	G	C	C	C	G	C	G	C	T	C	G	G	G	G	C	C	G	G	G	C	T	G	G	C	C	G	G	A	C
G	T	G	G	C	G	G	C	A	A	G	G	G	G	C	G	G	C	C	G	A	A	C	C	C	G	C	A	G	G	C	A	G	G	T	C	C	G	G	A	G	C	T	A	C	C	A	A	G	C
T	T	T	T	G	T	T	G	C	G	T	T	T	T	G	A	T	G	G	T	A	G	G	G	G	A	G	G	T	G	G	G	T	A	G	G	G	T	T	G	T	A	G	G	G	G	G	G	G	G
C	G	C	G	T	C	A	T	A	G	G	G	C	G	T	C	C	T	T	G	C	C	T	T	T	G	T	G	G	C	T	C	C	G	G	T	T	C	C	G	G	G	G	G	T	T	G	G	T	T
T	G	T	G	G	T	C	G	G	T	G	G	T	G	G	T	T	G	G	G	A	T	G	G	G	A	G	T	G	T	G	T	T	G	C	G	G	T	T	T	G	T	C	T	G	G	T	T	C	G
T	A	T	A	G	T	G	G	G	C	A	A	T	A	G	C	T	G	G	C	T	G	G	G	G	C	G	C	C	T	G	G	T	T	T	G	G	T	T	C	A	T	T	C	G	G	C	C	T	G
A	G	A	G	A	A	T	A	T	T	G	G	A	G	A	C	A	A	A	T	C	G	A	A	A	T	A	T	T	T	A	G	A	C	T	A	A	A	A	T	G	T	T	T	A	A	T	T	T	A
T	A	T	G	G	T	G	G	T	T	G	G	T	G	G	G	T	G	G	T	T	T	G	G	G	C	G	T	T	G	G	T	T	T	T	G	G	T	T	T	G	G	T	T	G	G	T	T	A	G
C	C	C	A	G	C	G	G	C	A	A	A	C	A	G	T	C	G	G	T	T	G	G	G	G	C	G	A	T	G	G	G	C	T	G	G	G	C	C	A	A	C	G	A	G	G	A	A	T	G
A	T	A	G	A	A	C	A	G	T	G	G	A	G	A	G	A	A	A	G	A	G	A	A	A	G	A	T	G	A	A	G	A	A	G	A	A	A	A	T	G	C	G	T	A	A	T	T	C	A
G	C	G	G	G	G	T	G	C	C	G	G	G	G	G	G	G	G	G	G	A	C	G	G	G	T	G	C	G	G	G	C	G	T	A	G	G	G	G	C	G	T	A	C	G	G	C	C	A	G
A	C	A	T	G	A	T	G	G	A	T	T	A	T	G	A	A	G	G	A	A	C	G	G	G	G	G	A	A	A	G	C	A	C	G	G	G	A	A	A	T	G	G	A	G	G	A	A	G	G
G	G	G	C	T	G	T	T	A	G	C	C	G	C	T	G	G	T	T	G	G	A	T	T	T	G	T	G	G	C	T	A	G	A	A	T	T	G	G	G	C	T	A	G	T	T	G	G	A	T
G	T	G	T	C	G	G	C	C	A	T	T	G	T	C	G	G	C	C	A	A	T	C	C	C	A	C	A	A	T	C	T	G	G	C	C	C	G	G	A	T	T	C	A	C	C	A	A	G	C
C	G	C	T	T	C	G	T	G	G	T	T	C	T	T	A	C	T	T	C	T	A	T	T	T	G	T	G	C	C	T	A	C	A	T	T	T	C	C	G	T	T	T	G	T	T	G	G	G	T
A	G	A	A	T	A	A	T	T	G	A	A	A	A	T	G	A	T	T	T	G	G	T	T	T	G	T	G	T	C	T	G	A	G	C	T	T	A	A	G	A	T	C	G	T	T	G	G	C	T
C	A	C	T	A	C	G	A	G	C	T	T	C	T	A	G	C	A	A	C	G	T	A	A	A	A	A	C	C	G	A	T	C	G	C	A	A	C	C	C	T	A	C	C	A	A	C	C	A	A
G	G	G	C	T	G	A	T	C	A	C	C	G	C	T	T	G	T	T	C	C	T	T	T	T	G	T	A	C	T	T	T	G	C	G	T	T	G	G	A	C	C	G	A	T	T	A	A	C	T
T	G	T	A	C	T	C	C	T	C	A	A	T	A	C	C	T	C	C	G	A	A	C	C	C	G	C	C	G	G	C	A	T	A	T	C	C	T	T	C	A	A	T	C	C	C	C	C	G	C
C	A	C	G	A	C	T	A	C	G	G	G	C	G	A	T	C	A	A	T	C	C	A	A	A	T	A	G	T	G	A	C	C	C	G	A	A	C	C	G	G	G	G	G	A	A	G	G	T	A
A	G	A	A	G	A	C	G	G	T	A	A	A	A	G	T	A	G	G	G	T	G	G	G	G	C	G	T	G	A	G	G	A	G	G	G	G	A	A	T	A	G	G	T	G	G	T	T	C	G
A	G	A	G	A	A	C	A	T	C	G	G	A	G	A	A	A	A	A	G	T	G	A	A	A	T	A	C	G	G	A	G	A	T	A	A	A	A	A	C	G	T	A	C	A	A	C	C	A	A
C	T	C	G	G	C	G	G	A	A	G	G	C	G	G	T	C	G	G	A	G	C	G	G	G	T	G	A	A	G	G	C	C	C	G	G	G	C	C	A	G	T	G	A	G	G	A	A	A	G
A	C	A	C	G	A	T	G	C	A	C	C	A	C	G	C	A	G	G	G	T	G	G	G	G	A	G	A	G	A	G	G	A	A	G	G	G	A	A	A	C	C	G	A	G	G	A	A	C	G
T	T	T	A	C	T	G	C	G	C	A	A	T	A	C	A	T	C	C	G	G	C	C	C	C	T	C	C	G	G	C	C	T	A	A	C	C	T	T	C	A	G	A	C	C	C	C	C	A	C
C	T	C	C	A	C	G	A	T	A	C	C	C	C	A	G	C	A	A	A	G	C	A	A	A	C	A	A	A	G	A	C	C	C	G	A	A	C	C	A	C	C	G	A	A	A	A	A	T	A
T	A	T	G	C	T	A	C	G	T	G	G	T	G	C	A	T	C	C	G	C	G	C	C	C	A	C	T	G	T	C	G	T	A	G	C	C	T	T	T	G	G	G	T	C	C	T	T	C	C
T	T	T	T	G	T	G	G	G	C	T	T	T	T	G	G	T	G	G	G	T	A	G	G	G	G	G	C	G	C	G	A	T	T	T	G	G	T	T	C	T	A	T	C	G	G	C	C	T	G
A	C	A	C	T	A	G	T	C	T	C	C	A	C	T	G	A	T	T	T	T	T	T	T	T	A	T	T	T	T	T	T	A	C	C	T	T	A	A	T	C	C	C	T	T	T	T	T	T	T
A	A	A	A	C	A	A	C	T	T	A	A	A	A	C	C	A	C	C	C	A	C	C	C	C	G	C	T	C	T	C	C	A	T	T	C	C	A	A	T	A	G	T	T	C	C	T	T	A	C
A	G	A	A	A	A	G	A	T	A	A	A	A	A	A	A	A	A	A	T	G	T	A	A	A	G	A	A	T	A	A	T	A	T	T	A	A	A	A	A	A	T	T	A	A	A	A	A	A	A
G	A	G	C	A	G	G	A	T	A	C	C	G	C	A	C	G	A	A	T	T	A	A	A	A	C	A	A	T	T	A	A	G	A	A	A	A	G	G	A	C	G	A	A	A	A	A	A	A	A
A	G	A	A	C	A	T	C	G	A	A	A	A	A	C	G	A	C	C	A	A	A	C	C	C	A	C	A	A	C	C	A	A	A	T	C	C	A	A	A	A	C	T	A	C	C	A	A	G	C
T	G	T	T	A	T	C	A	G	G	T	T	T	T	A	T	T	A	A	T	G	A	A	A	A	C	A	G	T	A	A	A	T	A	C	A	A	T	T	G	T	T	C	G	A	A	G	G	A	A
G	C	G	C	T	G	T	T	A	A	C	C	G	C	T	C	G	T	T	C	A	G	T	T	T	G	T	A	C	G	T	G	G	G	A	T	T	G	G	A	C	C	A	A	T	T	A	A	T	T
G	A	G	T	C	G	T	C	G	T	T	T	G	T	C	A	G	C	C	A	A	T	C	C	C	T	C	T	A	A	C	T	G	A	G	C	C	G	G	T	T	G	G	T	C	C	T	T	G	C
C	C	C	T	T	C	A	T	A	G	T	T	C	T	T	A	C	T	T	G	G	C	T	T	T	C	T	G	G	G	T	C	C	T	A	T	T	C	C	G	T	T	A	G	T	T	G	G	G	T
A	G	A	A	T	A	T	T	C	G	A	A	A	A	T	C	A	T	T	A	T	A	T	T	T	A	T	G	A	G	T	A	A	G	G	T	T	A	A	G	A	A	G	G	T	T	G	G	C	T
C	T	C	A	A	C	C	A	T	C	A	A	C	A	A	A	C	A	A	G	T	T	A	A	A	A	A	C	G	C	A	T	C	G	G	A	A	C	C	C	A	C	G	C	A	A	C	C	A	A
T	C	T	A	A	T	A	A	C	A	A	A	T	A	A	T	T	A	A	G	G	T	A	A	A	C	A	A	G	A	A	T	T	C	C	A	A	T	T	A	A	G	C	A	A	A	A	A	C	A
T	A	T	G	A	T	G	A	C	C	G	G	T	G	A	C	T	A	A	C	A	T	A	A	A	A	A	C	C	C	A	T	T	A	A	A	A	T	T	C	G	T	A	C	A	A	C	C	T	A
G	A	G	A	G	G	A	G	G	T	A	A	G	A	G	T	G	G	G	A	A	G	G	G	G	T	G	T	A	G	G	G	G	C	C	G	G	G	G	T	A	G	C	T	G	G	T	T	T	G
T	C	T	T	A	T	G	A	T	T	T	T	T	T	A	T	T	A	A	C	A	A	A	A	A	C	A	T	C	T	A	A	T	T	G	A	A	T	T	T	T	G	G	T	A	A	T	T	G	A
G	A	G	G	T	G	G	T	G	G	G	G	G	G	T	A	G	T	T	G	A	C	T	T	T	T	T	G	G	C	T	C	G	T	T	T	T	G	G	G	G	C	T	G	T	T	G	G	T	T
G	T	G	G	G	G	C	G	G	T	G	G	G	G	G	A	G	G	G	T	A	T	G	G	G	T	G	T	T	A	G	T	G	G	C	G	G	G	G	T	G	T	C	T	G	G	T	T	G	G
C	C	C	C	G	C	A	G	A	G	C	C	C	C	G	A	C	G	G	C	G	T	G	G	G	A	G	G	C	A	G	T	C	T	A	G	G	C	C	G	C	T	A	G	G	G	G	G	G	G
T	T	T	A	C	T	C	C	G	G	A	A	T	A	C	G	T	C	C	A	G	A	C	C	C	A	C	G	A	C	C	A	T	G	A	C	C	T	T	G	A	T	A	G	C	C	G	G	C	C
T	T	T	C	A	T	G	A	G	C	C	C	T	C	A	A	T	A	A	A	C	G	A	A	A	A	A	C	A	A	A	G	T	G	C	A	A	T	T	C	C	G	C	C	A	A	C	C	T	A
A	A	A	T	C	A	T	C	A	T	T	T	A	T	C	T	A	C	C	C	G	G	C	C	C	G	C	T	C	T	C	G	A	C	A	C	C	A	A	T	T	G	A	T	C	C	T	T	T	C
G	A	G	T	T	G	C	T	G	T	T	T	G	T	T	G	G	T	T	A	T	C	T	T	T	A	T	T	A	C	T	C	G	T	T	T	T	G	G	T	T	A	T	T	T	T	T	T	A	T
T	A	T	G	T	T	A	T	G	A	G	G	T	G	T	G	T	T	T	T	T	G	T	T	T	T	T	A	T	T	T	G	T	T	C	T	T	T	T	A	G	G	C	A	T	T	A	A	G	T
A	G	A	T	G	A	A	G	T	G	T	T	A	T	G	C	A	G	G	C	T	A	G	G	G	G	G	G	C	T	G	A	A	A	T	G	G	A	A	G	T	A	T	G	G	G	G	G	T	G
G	A	G	G	T	G	C	T	C	T	G	G	G	G	T	A	G	T	T	T	T	C	T	T	T	G	T	T	T	A	T	C	G	G	T	T	T	G	G	T	G	C	T	T	T	T	T	T	A	T
A	T	A	G	G	A	A	G	T	A	G	G	A	G	G	C	A	G	G	T	G	G	G	G	G	C	G	A	T	A	G	G	A	T	A	G	G	A	A	A	G	T	A	A	G	G	A	A	G	G
A	G	A	C	G	A	T	G	T	G	C	C	A	C	G	T	A	G	G	A	C	A	G	G	G	A	G	G	A	A	G	A	A	A	A	G	G	A	A	G	C	C	A	G	G	G	G	G	A	G
G	G	G	T	C	G	C	C	A	A	T	T	G	T	C	T	G	C	C	A	C	G	C	C	C	C	C	A	A	G	C	G	G	G	A	C	C	G	G	A	T	C	A	A	C	C	A	A	A	C
T	C	T	T	T	T	T	T	T	A	T	T	T	T	T	G	T	T	T	A	T	C	T	T	T	T	T	A	A	A	T	C	T	A	G	T	T	T	T	A	T	G	G	A	T	T	A	A	G	T
T	A	T	A	T	T	T	T	C	G	A	A	T	A	T	T	T	T	T	G	C	T	T	T	T	T	T	G	G	T	T	T	T	A	A	T	T	T	T	G	A	T	A	G	T	T	G	G	T	T
G	C	G	G	A	G	A	A	A	T	G	G	G	G	A	G	G	A	A	A	A	T	A	A	A	G	A	T	A	G	A	T	G	G	T	A	A	G	G	T	G	G	T	T	A	A	T	T	T	A
A	T	A	T	G	A	A	G	G	T	T	T	A	T	G	G	A	G	G	T	A	G	G	G	G	T	G	T	T	G	G	G	A	T	G	G	G	A	A	T	T	G	G	T	G	G	T	T	G	G
A	T	A	A	T	A	A	T	A	G	A	A	A	A	T	C	A	T	T	G	C	G	T	T	T	G	T	G	G	C	T	G	A	T	G	T	T	A	A	G	A	A	G	G	T	T	G	G	A	T
A	G	A	G	A	A	G	A	G	A	G	G	A	G	A	T	A	A	A	G	T	C	A	A	A	G	A	A	G	A	A	C	A	G	C	A	A	A	A	A	G	G	C	A	A	A	A	A	A	A
A	T	A	A	G	A	A	G	G	A	A	A	A	A	G	T	A	G	G	C	T	A	G	G	G	C	G	A	C	C	G	A	A	A	A	G	G	A	A	A	A	G	A	A	G	G	A	A	A	G
A	G	A	A	A	A	T	A	C	A	A	A	A	A	A	A	A	A	A	A	G	C	A	A	A	T	A	A	A	T	A	C	A	A	C	A	A	A	A	A	A	A	C	A	A	A	A	A	A	A
G	G	G	G	A	G	G	A	A	A	G	G	G	G	A	G	G	A	A	C	A	T	A	A	A	T	A	A	C	T	A	T	G	A	T	A	A	G	G	A	G	G	T	A	A	A	A	A	A	A
G	C	G	T	G	G	G	G	C	A	T	T	G	T	G	T	G	G	G	T	A	G	G	G	G	A	G	A	T	G	G	G	G	A	T	G	G	G	G	A	T	G	T	A	G	G	A	A	G	G
C	T	C	T	T	C	C	T	G	G	T	T	C	T	T	A	C	T	T	T	C	A	T	T	T	G	T	G	T	T	T	A	C	A	G	T	T	C	C	G	T	T	G	G	T	T	G	G	G	T
G	T	G	G	T	G	A	T	T	G	G	G	G	G	T	G	G	T	T	G	A	T	T	T	T	T	T	G	G	G	T	T	G	G	T	T	T	G	G	G	G	C	T	G	T	T	G	G	C	T
T	A	T	A	G	T	C	G	C	C	A	A	T	A	G	A	T	G	G	T	G	C	G	G	G	A	G	C	T	G	G	C	T	G	G	G	G	T	T	C	A	T	G	C	G	G	C	C	G	G
T	G	T	A	A	T	T	A	A	G	A	A	T	A	A	A	T	A	A	G	C	C	A	A	A	G	A	G	G	C	A	C	T	C	G	A	A	T	T	G	A	T	G	G	A	A	G	G	T	A
T	T	T	A	A	T	T	A	A	T	A	A	T	A	A	G	T	A	A	G	C	T	A	A	A	A	A	T	G	T	A	T	T	G	C	A	A	T	T	T	A	A	C	T	A	A	T	T	T	A
T	A	T	A	A	T	G	A	C	T	A	A	T	A	A	T	T	A	A	C	C	T	A	A	A	A	A	T	C	T	A	T	T	T	T	A	A	T	T	T	A	T	T	T	A	A	T	T	T	A
G	G	G	A	A	G	T	A	A	T	A	A	G	A	A	T	G	A	A	T	T	A	A	A	A	G	A	T	T	A	A	A	G	T	T	A	A	G	G	T	A	C	T	T	A	A	T	T	T	A
C	A	C	G	A	C	G	A	T	T	G	G	C	G	A	G	C	A	A	T	A	T	A	A	A	T	A	T	T	G	A	T	C	T	A	A	A	C	C	T	G	A	A	T	A	A	T	T	G	A
C	A	C	G	G	C	G	G	C	G	G	G	C	G	G	A	C	G	G	A	T	G	G	G	G	T	G	G	A	T	G	G	C	T	G	G	G	C	C	G	G	G	G	G	G	G	G	G	C	G
T	G	T	C	G	T	C	G	T	C	C	C	T	C	G	A	T	G	G	G	G	A	G	G	G	G	G	C	G	A	G	A	T	G	T	G	G	T	T	C	C	A	T	C	G	G	C	C	C	G
C	T	C	G	C	C	T	C	T	C	G	G	C	G	C	A	C	C	C	T	T	A	C	C	C	A	C	C	T	G	C	A	C	C	A	C	C	C	C	C	G	G	A	C	C	C	C	C	T	C
A	T	A	T	G	A	T	G	A	T	T	T	A	T	G	A	A	G	G	A	G	G	G	G	G	A	G	T	A	A	G	G	A	C	G	G	G	A	A	T	T	G	G	T	G	G	T	T	C	G
A	G	A	T	T	A	A	T	A	C	T	T	A	T	T	A	A	T	T	G	T	A	T	T	T	A	T	C	G	A	T	A	A	T	A	T	T	A	A	C	T	C	A	C	T	T	C	C	A	T
C	A	C	T	T	C	G	T	A	A	T	T	C	T	T	G	C	T	T	A	T	T	T	T	T	A	T	A	A	G	T	T	C	C	A	T	T	C	C	A	T	A	A	A	T	T	A	A	A	T
T	A	T	T	T	T	T	T	G	A	T	T	T	T	T	G	T	T	T	A	C	T	T	T	T	A	T	A	A	T	T	T	T	A	G	T	T	T	T	A	T	C	G	A	T	T	A	A	C	T
T	A	T	G	T	T	A	T	A	C	G	G	T	G	T	C	T	T	T	G	A	T	T	T	T	G	T	C	G	T	T	T	T	A	T	T	T	T	T	C	G	G	T	C	T	T	C	C	T	T
G	A	G	C	G	G	G	G	T	T	C	C	G	C	G	G	G	G	G	T	T	T	G	G	G	G	G	T	T	G	G	T	G	C	T	G	G	G	G	T	C	T	T	T	G	G	T	T	T	G
A	A	A	C	C	A	A	C	G	T	C	C	A	C	C	T	A	C	C	T	C	C	C	C	C	C	C	T	T	A	C	C	A	T	G	C	C	A	A	T	C	C	G	T	C	C	T	T	G	C
A	G	A	T	C	A	A	C	G	G	T	T	A	T	C	T	A	C	C	G	A	A	C	C	C	G	C	G	G	A	C	A	A	T	A	C	C	A	A	G	T	A	A	G	C	C	G	G	A	C
C	G	C	C	T	C	G	T	C	A	C	C	C	C	T	T	C	T	T	A	A	A	T	T	T	T	T	A	A	A	T	A	C	G	A	T	T	C	C	A	C	A	A	A	T	T	A	A	A	T
A	C	A	A	C	A	T	C	A	A	A	A	A	A	C	T	A	C	C	A	A	G	C	C	C	T	C	A	A	A	C	G	A	A	A	C	C	A	A	A	A	C	A	A	C	C	A	A	C	C
G	G	G	A	A	G	T	A	C	C	A	A	G	A	A	G	G	A	A	A	C	A	A	A	A	T	A	C	A	A	A	A	G	A	A	A	A	G	G	C	A	A	A	C	A	A	C	C	A	A
C	T	C	C	A	C	G	A	T	A	C	C	C	C	A	C	C	A	A	A	G	A	A	A	A	T	A	A	A	G	A	A	C	C	A	A	A	C	C	A	C	T	A	A	A	A	A	A	G	A
C	T	C	T	C	C	A	C	T	G	T	T	C	T	C	C	C	C	C	A	T	A	C	C	C	G	C	G	A	G	C	A	C	A	G	C	C	C	C	G	T	C	G	G	C	C	G	G	C	C
C	T	C	T	T	C	A	T	G	C	T	T	C	T	T	T	C	T	T	G	T	A	T	T	T	C	T	C	G	C	T	A	C	G	G	T	T	C	C	C	T	T	G	C	T	T	C	C	C	T
T	T	T	G	T	T	A	T	T	C	G	G	T	G	T	C	T	T	T	G	C	C	T	T	T	C	T	C	G	G	T	C	T	C	C	T	T	T	T	C	G	T	C	C	T	T	C	C	C	T
A	G	A	A	G	A	A	G	G	C	A	A	A	A	G	A	A	G	G	C	G	T	G	G	G	T	G	C	C	T	G	T	A	C	G	G	G	A	A	C	A	A	G	C	G	G	C	C	T	G
T	C	T	A	A	T	A	A	G	T	A	A	T	A	A	A	T	A	A	G	G	G	A	A	A	C	A	T	G	T	A	G	T	C	T	A	A	T	T	T	A	A	T	T	A	A	T	T	A	A
G	C	G	C	A	G	G	A	C	A	C	C	G	C	A	C	G	A	A	T	A	G	A	A	A	A	A	A	T	T	A	G	G	T	T	A	A	G	G	A	C	A	T	A	A	A	A	A	T	A
T	T	T	A	C	T	G	C	T	T	A	A	T	A	C	T	T	C	C	T	T	A	C	C	C	A	C	T	T	T	C	A	T	A	T	C	C	T	T	T	A	G	T	T	C	C	T	T	G	C
G	C	G	G	A	G	C	A	T	G	G	G	G	G	A	T	G	A	A	T	G	A	A	A	A	C	A	G	T	G	A	A	G	T	T	A	A	G	G	G	G	A	T	G	A	A	G	G	T	A
T	A	T	C	G	T	G	G	A	T	C	C	T	C	G	G	T	G	G	T	C	C	G	G	G	T	G	T	T	C	G	C	T	G	G	G	G	T	T	T	C	T	G	T	G	G	T	T	G	G
T	A	T	C	C	T	T	C	G	G	C	C	T	C	C	A	T	C	C	G	T	A	C	C	C	T	C	G	G	C	C	A	T	T	C	C	C	T	T	G	C	G	C	G	C	C	G	G	T	C
C	C	C	C	C	C	T	C	T	T	C	C	C	C	C	A	C	C	C	C	C	C	C	C	C	G	C	T	C	T	C	C	C	G	C	C	C	C	C	T	C	G	C	T	C	C	T	T	T	C
A	T	A	T	C	A	T	C	A	T	T	T	A	T	C	C	A	C	C	C	G	T	C	C	C	A	C	T	C	C	C	T	A	T	T	C	C	A	A	T	T	C	T	T	C	C	T	T	C	C
T	T	T	A	T	T	T	T	G	C	A	A	T	A	T	A	T	T	T	T	A	A	T	T	T	A	T	C	T	A	T	A	T	T	C	T	T	T	T	C	A	A	C	C	T	T	C	C	A	T
C	G	C	T	A	C	G	A	A	A	T	T	C	T	A	G	C	A	A	C	A	A	A	A	A	C	A	G	C	A	A	A	C	C	A	A	A	C	C	A	T	C	A	A	A	A	A	A	T	A
A	A	A	G	T	A	C	T	A	T	G	G	A	G	T	C	A	T	T	A	C	A	T	T	T	A	T	T	A	C	T	A	A	A	A	T	T	A	A	T	G	T	A	T	T	T	T	T	C	T
A	A	A	T	G	A	C	G	G	C	T	T	A	T	G	C	A	G	G	A	T	C	G	G	G	G	G	C	A	T	G	C	A	T	C	G	G	A	A	C	T	T	C	C	G	G	C	C	A	G
A	C	A	G	T	A	T	T	T	A	G	G	A	G	T	C	A	T	T	C	G	A	T	T	T	C	T	A	C	T	T	A	A	C	T	T	T	A	A	A	G	G	T	A	T	T	A	A	A	T
C	A	C	T	G	C	C	G	T	A	T	T	C	T	G	T	C	G	G	T	C	T	G	G	G	C	G	A	T	G	G	T	C	A	T	G	G	C	C	A	T	T	T	A	G	G	A	A	A	G
G	G	G	T	T	G	A	T	G	A	T	T	G	T	T	A	G	T	T	T	A	A	T	T	T	C	T	A	T	A	T	A	G	A	G	T	T	G	G	A	T	G	G	A	T	T	A	A	C	T
T	C	T	C	T	T	A	T	A	C	C	C	T	C	T	T	T	T	T	G	C	G	T	T	T	T	T	C	G	A	T	G	T	A	A	T	T	T	T	C	C	G	A	C	T	T	C	C	G	T
T	C	T	A	C	T	C	C	A	G	A	A	T	A	C	G	T	C	C	A	C	C	C	C	C	A	C	G	A	C	C	C	T	C	A	C	C	T	T	G	A	C	A	G	C	C	G	G	T	C
C	C	C	T	A	C	T	A	A	T	T	T	C	T	A	T	C	A	A	A	T	A	A	A	A	T	A	T	A	A	A	A	C	G	C	A	A	C	C	T	T	T	C	T	A	A	T	T	T	A
G	T	G	C	T	G	T	T	A	T	C	C	G	C	T	G	G	T	T	C	C	G	T	T	T	G	T	T	C	G	T	G	G	T	A	T	T	G	G	T	C	T	A	T	T	T	T	T	C	T
G	A	G	A	C	G	G	C	A	C	A	A	G	A	C	T	G	C	C	A	A	T	C	C	C	T	C	C	A	C	C	T	G	T	G	C	C	G	G	C	A	A	G	C	C	C	C	C	G	C
A	T	A	A	A	A	A	A	G	G	A	A	A	A	A	T	A	A	A	G	T	G	A	A	A	G	A	G	G	C	A	G	A	C	C	A	A	A	A	G	A	G	C	G	A	A	G	G	G	A
T	G	T	A	A	T	A	A	G	G	A	A	T	A	A	C	T	A	A	C	G	G	A	A	A	T	A	G	C	C	A	G	T	G	C	A	A	T	T	G	A	T	C	G	A	A	G	G	A	A
G	T	G	C	A	G	C	A	C	A	C	C	G	C	A	A	G	A	A	C	G	T	A	A	A	T	A	A	C	T	A	T	G	G	C	A	A	G	G	A	C	A	C	A	A	A	A	A	T	A
C	G	C	G	C	C	A	C	G	T	G	G	C	G	C	T	C	C	C	C	T	G	C	C	C	C	C	T	C	A	C	G	C	A	T	C	C	C	C	T	G	G	T	T	C	C	T	T	G	C
T	T	T	T	G	T	G	G	T	G	T	T	T	T	G	C	T	G	G	T	C	T	G	G	G	A	G	G	T	T	G	T	T	T	A	G	G	T	T	G	T	A	A	G	G	G	G	G	C	G
C	T	C	T	T	C	C	T	T	C	T	T	C	T	T	A	C	T	T	A	A	T	T	T	T	T	T	C	A	G	T	T	C	G	T	T	T	C	C	C	T	A	T	C	T	T	C	C	T	T
G	C	G	C	T	G	C	T	T	T	C	C	G	C	T	A	G	T	T	T	T	A	T	T	T	C	T	T	T	T	T	A	G	C	G	T	T	G	G	T	C	G	G	T	T	T	T	T	C	T
A	A	A	G	C	A	C	C	T	C	G	G	A	G	C	A	A	C	C	G	G	C	C	C	C	A	C	C	G	G	C	C	A	T	T	C	C	A	A	C	G	T	T	C	C	C	C	C	G	C
A	T	A	G	G	A	T	G	G	G	G	G	A	G	G	C	A	G	G	T	T	C	G	G	G	A	G	G	T	T	G	C	A	C	G	G	G	A	A	G	G	T	G	G	G	G	G	G	A	G
C	C	C	A	G	C	A	G	C	A	A	A	C	A	G	G	C	G	G	G	T	C	G	G	G	A	G	A	G	T	G	C	C	G	T	G	G	C	C	A	A	G	T	A	G	G	A	A	A	G
T	A	T	T	A	T	T	A	C	A	T	T	T	T	A	T	T	A	A	T	A	G	A	A	A	C	A	A	T	C	A	G	T	A	T	A	A	T	T	A	T	A	T	A	A	A	A	A	C	A
G	A	G	G	T	G	G	T	T	C	G	G	G	G	T	T	G	T	T	T	T	T	T	T	T	G	T	C	T	A	T	T	G	A	C	T	T	G	G	C	G	A	C	C	T	T	C	C	T	T
C	A	C	C	G	C	T	G	C	T	C	C	C	C	G	C	C	G	G	C	G	G	G	G	G	T	G	T	C	T	G	G	C	C	A	G	G	C	C	T	C	A	A	T	G	G	T	T	G	G
A	C	A	T	C	A	G	C	A	G	T	T	A	T	C	G	A	C	C	A	G	A	C	C	C	T	C	G	A	C	C	A	A	T	T	C	C	A	A	G	T	A	T	G	C	C	G	G	C	C
C	G	C	C	T	C	T	T	A	C	C	C	C	C	T	G	C	T	T	T	T	A	T	T	T	C	T	C	T	A	T	A	C	G	C	T	T	C	C	C	C	A	C	C	T	T	C	C	A	T
C	T	C	G	C	C	T	C	C	A	G	G	C	G	C	A	C	C	C	C	T	C	C	C	C	G	C	A	C	A	C	C	C	C	A	C	C	C	C	A	G	G	A	A	C	C	A	A	C	C
T	T	T	A	G	T	C	G	T	C	A	A	T	A	G	T	T	G	G	A	G	T	G	G	G	G	G	C	A	A	G	T	T	A	A	G	G	T	T	C	A	G	A	C	G	G	C	C	C	G
C	C	C	A	A	C	A	A	T	C	A	A	C	A	A	G	C	A	A	A	A	C	A	A	A	A	A	C	A	C	A	C	C	C	A	A	A	C	C	C	A	C	A	C	A	A	C	C	T	A
A	G	A	C	A	A	T	A	G	T	C	C	A	C	A	C	A	A	A	A	G	A	A	A	A	T	A	T	A	G	A	A	A	C	C	A	A	A	A	T	C	G	C	T	A	A	T	T	C	A
T	G	T	T	C	T	C	C	A	C	T	T	T	T	C	T	T	C	C	C	C	T	C	C	C	G	C	C	C	T	C	T	T	T	G	C	C	T	T	C	T	T	G	C	C	C	C	C	A	C
G	A	G	G	T	G	A	T	A	A	G	G	G	G	T	C	G	T	T	G	T	G	T	T	T	C	T	A	G	T	T	G	G	C	T	T	T	G	G	A	G	T	T	A	T	T	A	A	T	T
G	T	G	C	G	G	A	G	C	T	C	C	G	C	G	G	G	G	G	T	G	C	G	G	G	T	G	T	T	C	G	C	G	A	T	G	G	G	G	T	C	T	T	T	G	G	T	T	G	G
T	G	T	A	C	T	A	C	A	G	A	A	T	A	C	A	T	C	C	T	G	G	C	C	C	C	C	G	T	G	C	G	T	T	C	C	C	T	T	A	A	T	C	G	C	C	G	G	G	C
C	C	C	C	A	C	C	A	G	G	C	C	C	C	A	A	C	A	A	C	T	T	A	A	A	G	A	G	C	G	A	T	C	G	G	A	A	C	C	T	C	G	G	G	A	A	G	G	T	A
A	T	A	C	C	A	G	C	C	T	C	C	A	C	C	C	A	C	C	G	A	G	C	C	C	A	C	T	G	A	C	G	A	A	G	C	C	A	A	G	C	C	G	T	C	C	T	T	C	C
T	C	T	T	C	T	T	C	C	C	T	T	T	T	C	T	T	C	C	G	G	A	C	C	C	A	C	C	G	T	C	A	T	G	A	C	C	T	T	G	T	C	A	C	C	C	C	C	A	C
G	G	G	C	T	G	T	T	C	A	C	C	G	C	T	G	G	T	T	A	C	G	T	T	T	C	T	A	A	G	T	G	G	C	T	T	T	G	G	A	C	T	T	A	T	T	A	A	T	T
T	A	T	A	C	T	C	C	T	T	A	A	T	A	C	C	T	C	C	T	A	C	C	C	C	T	C	T	T	C	C	C	T	T	G	C	C	T	T	G	A	C	G	T	C	C	T	T	G	C
T	A	T	T	A	T	G	A	A	G	T	T	T	T	A	A	T	A	A	G	G	T	A	A	A	G	A	G	G	T	A	T	T	G	C	A	A	T	T	C	T	A	C	G	A	A	G	G	T	A
A	C	A	G	T	A	G	T	T	T	G	G	A	G	T	C	A	T	T	C	A	T	T	T	T	C	T	T	C	C	T	T	A	G	T	T	T	A	A	T	G	A	T	T	T	T	T	T	T	T
T	T	T	G	G	T	A	G	G	T	G	G	T	G	G	C	T	G	G	T	A	A	G	G	G	A	G	T	T	G	G	A	T	T	C	G	G	T	T	G	G	C	C	T	G	G	T	T	A	G
G	G	G	T	G	G	T	G	T	A	T	T	G	T	G	T	G	G	G	C	C	A	G	G	G	C	G	A	C	A	G	A	G	A	G	G	G	G	G	G	T	T	G	A	G	G	A	A	T	G
G	C	G	C	T	G	G	T	G	T	C	C	G	C	T	C	G	T	T	G	T	C	T	T	T	C	T	T	G	A	T	C	G	G	A	T	T	G	G	T	C	T	A	T	T	T	T	T	G	T
T	A	T	A	C	T	C	C	T	G	A	A	T	A	C	A	T	C	C	A	C	G	C	C	C	T	C	G	A	C	C	G	T	C	A	C	C	T	T	A	A	G	A	G	C	C	G	G	G	C
T	C	T	T	A	T	T	A	T	G	T	T	T	T	A	T	T	A	A	A	G	G	A	A	A	C	A	G	A	T	A	G	T	A	C	A	A	T	T	G	T	A	C	G	A	A	G	G	T	A
G	C	G	G	T	G	C	T	C	T	G	G	G	G	T	G	G	T	T	C	A	A	T	T	T	A	T	T	C	G	T	A	G	G	T	T	T	G	G	C	G	A	T	T	T	T	T	T	T	T
A	T	A	T	G	A	G	G	A	T	T	T	A	T	G	G	A	G	G	T	A	G	G	G	G	T	G	T	T	C	G	G	A	A	G	G	G	A	A	A	T	C	G	T	G	G	T	T	G	G
G	C	G	T	T	G	A	T	T	G	T	T	G	T	T	T	G	T	T	G	G	G	T	T	T	G	T	G	G	A	T	G	G	A	C	T	T	G	G	G	T	A	C	G	T	T	G	G	A	T
C	A	C	A	T	C	A	T	C	A	A	A	C	A	T	C	C	T	T	C	G	G	T	T	T	G	T	A	C	C	T	G	C	C	A	T	T	C	C	A	A	G	A	A	T	T	A	A	G	T
T	T	T	T	A	T	C	A	A	G	T	T	T	T	A	A	T	A	A	A	C	G	A	A	A	T	A	G	A	C	A	G	T	T	C	A	A	T	T	A	T	C	C	G	A	A	G	G	C	A
G	G	G	G	T	G	T	T	A	C	G	G	G	G	T	T	G	T	T	C	A	C	T	T	T	C	T	C	C	T	T	C	G	C	C	T	T	G	G	C	G	C	C	C	T	T	C	C	T	T
G	G	G	G	G	G	G	G	A	T	G	G	G	G	G	G	G	G	G	C	T	A	G	G	G	A	G	T	C	C	G	A	G	G	T	G	G	G	G	T	G	C	T	T	G	G	T	T	G	G
T	T	T	T	G	T	C	G	C	G	T	T	T	T	G	T	T	G	G	T	T	T	G	G	G	T	G	G	T	A	G	T	T	A	C	G	G	T	T	C	T	T	C	G	G	G	G	G	G	G
A	C	A	T	T	A	A	T	G	G	T	T	A	T	T	T	A	T	T	C	C	A	T	T	T	G	T	G	C	T	T	A	A	A	A	T	T	A	A	G	T	A	A	G	T	T	G	G	T	T
G	A	G	G	T	G	C	T	T	T	G	G	G	G	T	A	G	T	T	A	A	C	T	T	T	T	T	T	A	G	T	C	G	G	T	T	T	G	G	A	G	T	T	T	T	T	T	T	A	T
C	T	C	A	G	C	C	G	T	A	A	A	C	A	G	T	C	G	G	T	G	A	G	G	G	T	G	A	T	G	G	A	C	G	G	G	G	C	C	A	A	G	G	A	G	G	A	A	G	G
A	G	A	G	A	A	T	A	C	G	G	G	A	G	A	G	A	A	A	G	T	C	A	A	A	A	A	G	G	T	A	C	A	C	G	A	A	A	A	G	G	T	G	G	A	A	G	G	C	A
G	T	G	C	G	G	C	G	G	C	C	C	G	C	G	G	G	G	G	G	A	T	G	G	G	T	G	C	G	C	G	T	G	A	T	G	G	G	G	G	C	G	T	C	G	G	C	C	A	G
A	T	A	T	C	A	A	C	G	A	T	T	A	T	C	T	A	C	C	T	C	C	C	C	C	G	C	A	T	A	C	C	A	T	C	C	C	A	A	C	T	T	C	A	C	C	A	A	G	C
A	A	A	G	T	A	T	T	A	G	G	G	A	G	T	T	A	T	T	C	G	G	T	T	T	G	T	G	C	T	T	G	A	T	A	T	T	A	A	A	G	T	A	G	T	T	G	G	A	T
C	T	C	G	G	C	G	G	T	A	G	G	C	G	G	G	C	G	G	A	G	C	G	G	G	T	G	A	A	G	G	C	C	C	T	G	G	C	C	T	G	C	T	A	G	G	A	A	A	G
T	G	T	T	G	T	G	G	G	A	T	T	T	T	G	A	T	G	G	T	T	T	G	G	G	T	G	A	T	T	G	T	T	A	G	G	G	T	T	T	T	A	G	A	G	G	A	A	C	G
C	G	C	A	T	C	T	T	C	C	A	A	C	A	T	G	C	T	T	G	C	A	T	T	T	G	T	C	G	T	T	A	C	G	T	T	T	C	C	C	A	T	T	C	T	T	C	C	T	T
G	T	G	G	A	G	C	A	T	T	G	G	G	G	A	C	G	A	A	T	G	T	A	A	A	A	A	T	T	A	A	T	G	T	T	A	A	G	G	A	G	C	T	T	A	A	T	T	C	A
A	T	A	C	G	A	A	G	C	C	C	C	A	C	G	T	A	G	G	T	T	G	G	G	G	G	G	C	T	T	G	G	A	A	A	G	G	A	A	G	C	A	A	C	G	G	C	C	G	G
A	G	A	A	C	A	T	C	G	G	A	A	A	A	C	G	A	C	C	A	A	T	C	C	C	C	C	G	A	G	C	T	A	C	T	C	C	A	A	T	A	A	T	G	C	C	G	G	A	C
G	A	G	G	A	G	G	A	A	A	G	G	G	G	A	G	G	A	A	T	G	C	A	A	A	T	A	A	T	G	A	C	G	G	G	A	A	G	G	A	G	A	G	A	A	A	A	A	A	A
G	G	G	A	G	G	T	G	A	A	A	A	G	A	G	T	G	G	G	G	T	G	G	G	G	G	G	A	G	T	G	G	G	G	G	G	G	G	G	C	A	C	G	A	G	G	A	A	G	G
C	C	C	A	A	C	T	A	C	G	A	A	C	A	A	A	C	A	A	G	G	A	A	A	A	G	A	G	G	T	A	A	C	T	T	A	A	C	C	G	A	G	T	G	A	A	G	G	G	A
A	T	A	C	A	A	A	A	T	G	C	C	A	C	A	G	A	A	A	T	G	T	A	A	A	T	A	G	T	G	A	T	A	C	T	A	A	A	A	G	C	T	T	G	A	A	G	G	C	A
T	G	T	T	C	T	T	C	G	C	T	T	T	T	C	C	T	C	C	T	T	A	C	C	C	A	C	C	T	A	C	A	T	G	G	C	C	T	T	T	T	T	G	C	C	C	C	C	A	C
T	G	T	C	T	T	G	T	C	A	C	C	T	C	T	A	T	T	T	G	G	A	T	T	T	G	T	A	G	G	T	A	T	T	A	T	T	T	T	C	C	C	A	A	T	T	A	A	T	T
C	T	C	G	C	C	G	C	A	T	G	G	C	G	C	G	C	C	C	A	A	C	C	C	C	C	C	T	A	C	C	C	C	A	G	C	C	C	C	G	G	G	G	T	C	C	T	T	T	C
A	A	A	A	G	A	T	G	C	T	A	A	A	A	G	A	A	G	G	G	G	A	G	G	G	A	G	T	G	T	G	A	A	G	C	G	G	A	A	T	A	G	C	T	G	G	T	T	C	G
G	G	G	A	A	G	T	A	C	C	A	A	G	A	A	A	G	A	A	C	A	A	A	A	A	G	A	C	C	G	A	A	G	T	T	A	A	G	G	A	A	A	T	C	A	A	C	C	A	A
T	C	T	G	A	T	G	A	T	A	G	G	T	G	A	C	T	A	A	T	C	C	A	A	A	A	A	A	T	G	A	C	T	G	G	A	A	T	T	G	G	T	G	A	A	A	A	A	G	A
A	A	A	G	G	A	A	G	C	G	G	G	A	G	G	T	A	G	G	G	A	T	G	G	G	A	G	G	G	T	G	T	A	G	G	G	G	A	A	T	G	G	G	G	G	G	G	G	T	G
C	G	C	C	G	C	G	G	A	T	C	C	C	C	G	C	C	G	G	G	C	T	G	G	G	C	G	T	G	A	G	T	C	T	T	G	G	C	C	G	C	C	T	T	G	G	T	T	A	G
G	A	G	A	C	G	C	C	T	A	A	A	G	A	C	G	G	C	C	T	T	C	C	C	C	T	C	A	T	G	C	C	G	G	A	C	C	G	G	G	A	T	A	A	C	C	A	A	C	C
G	A	G	T	A	G	T	A	G	C	T	T	G	T	A	A	G	A	A	A	T	T	A	A	A	C	A	C	A	C	A	T	G	A	G	A	A	G	G	T	T	C	G	C	A	A	C	C	G	A
T	C	T	T	T	T	G	T	G	G	T	T	T	T	T	A	T	T	T	G	G	G	T	T	T	G	T	G	G	A	T	G	T	G	C	T	T	T	T	G	T	G	C	G	T	T	G	G	G	T
C	T	C	C	T	C	G	T	T	G	C	C	C	C	T	G	C	T	T	C	G	T	T	T	T	A	T	G	C	G	T	T	C	A	A	T	T	C	C	A	C	A	A	G	T	T	G	G	T	T
G	C	G	A	C	G	T	C	C	T	A	A	G	A	C	G	G	C	C	A	T	G	C	C	C	A	C	T	A	A	C	G	G	C	G	C	C	G	G	G	A	A	G	T	C	C	T	T	C	C
T	G	T	G	A	T	A	A	A	C	G	G	T	G	A	C	T	A	A	G	G	G	A	A	A	G	A	C	G	A	A	G	T	A	A	A	A	T	T	A	G	C	A	C	A	A	C	C	G	A
A	A	A	T	G	A	G	G	T	G	T	T	A	T	G	A	A	G	G	A	T	C	G	G	G	G	G	G	A	C	G	C	A	C	A	G	G	A	A	C	T	T	A	G	G	G	G	G	T	G
G	A	G	A	T	G	C	T	G	T	A	A	G	A	T	T	G	T	T	A	C	C	T	T	T	C	T	T	A	T	T	C	G	T	C	T	T	G	G	A	A	G	C	T	T	T	T	T	A	T
T	G	T	C	A	T	A	A	T	A	C	C	T	C	A	T	T	A	A	C	C	C	A	A	A	A	A	A	C	C	A	C	T	T	T	A	A	T	T	C	C	C	T	A	A	A	A	A	G	A
G	G	G	G	C	G	G	C	T	G	G	G	G	G	C	C	G	C	C	T	T	T	C	C	C	T	C	G	T	G	C	T	G	G	C	C	C	G	G	T	G	A	C	G	C	C	G	G	T	C
G	C	G	G	G	G	A	G	A	T	G	G	G	G	G	A	G	G	G	C	T	G	G	G	G	T	G	T	C	A	G	G	G	G	G	G	G	G	G	T	G	C	G	T	G	G	T	T	G	G
T	A	T	T	G	T	A	G	T	G	T	T	T	T	G	G	T	G	G	G	G	A	G	G	G	C	G	G	G	A	G	A	T	T	A	G	G	T	T	G	T	C	A	G	G	G	G	G	G	G
G	T	G	C	T	G	C	T	G	G	C	C	G	C	T	T	G	T	T	A	T	T	T	T	T	A	T	G	A	G	T	T	G	G	A	T	T	G	G	G	C	T	A	G	T	T	G	G	T	T
A	T	A	G	C	A	T	C	G	T	G	G	A	G	C	A	A	C	C	A	C	G	C	C	C	G	C	T	A	G	C	G	A	T	G	C	C	A	A	T	G	C	G	T	C	C	T	T	G	C
G	C	G	T	G	G	C	G	T	G	T	T	G	T	G	C	G	G	G	G	C	G	G	G	G	T	G	G	G	C	G	G	G	C	G	G	G	G	G	G	T	A	G	G	G	G	G	G	A	G
A	A	A	A	T	A	G	T	T	A	A	A	A	A	T	G	A	T	T	G	C	C	T	T	T	A	T	A	G	A	T	C	A	C	C	T	T	A	A	T	A	T	C	A	T	T	A	A	G	T
C	G	C	G	A	C	A	A	G	G	G	G	C	G	A	G	C	A	A	C	T	T	A	A	A	C	A	G	C	T	A	T	C	T	A	A	A	C	C	C	G	G	A	G	A	A	G	G	A	A
A	T	A	T	G	A	A	G	A	A	T	T	A	T	G	T	A	G	G	A	C	A	G	G	G	G	G	A	A	T	G	A	A	T	T	G	G	A	A	C	T	G	T	A	G	G	A	A	C	G
C	A	C	G	T	C	G	T	G	C	G	G	C	G	T	C	C	T	T	T	A	C	T	T	T	G	T	C	T	C	T	C	C	G	T	T	T	C	C	T	G	T	T	C	T	T	C	C	A	T
T	C	T	G	G	T	G	G	C	A	G	G	T	G	G	G	T	G	G	T	T	C	G	G	G	T	G	A	T	A	G	C	T	T	C	G	G	T	T	T	G	C	C	A	G	G	A	A	C	G
T	G	T	T	G	T	C	G	T	C	T	T	T	T	G	T	T	G	G	C	G	C	G	G	G	C	G	C	C	G	G	C	T	C	A	G	G	T	T	G	T	A	A	C	G	G	C	C	T	G
G	G	G	G	T	G	A	T	G	T	G	G	G	G	T	A	G	T	T	A	T	T	T	T	T	G	T	T	A	T	T	T	G	C	G	T	T	G	G	T	G	T	G	T	T	T	T	T	T	T
G	T	G	A	G	G	T	G	G	T	A	A	G	A	G	G	G	G	G	G	G	C	G	G	G	T	G	T	G	A	G	C	G	C	T	G	G	G	G	C	A	G	T	T	G	G	T	T	G	G
T	C	T	G	A	T	T	A	T	G	G	G	T	G	A	T	T	A	A	T	G	T	A	A	A	A	A	G	T	C	A	T	T	T	A	A	A	T	T	C	G	T	A	G	A	A	G	G	G	A
G	G	G	A	G	G	C	G	A	G	A	A	G	A	G	G	G	G	G	A	G	T	G	G	G	G	G	G	A	G	G	T	G	C	C	G	G	G	G	C	A	T	C	G	G	G	G	G	T	G
T	T	T	C	A	T	A	A	G	T	C	C	T	C	A	G	T	A	A	C	C	G	A	A	A	T	A	T	C	G	A	G	T	A	G	A	A	T	T	T	C	A	G	T	A	A	T	T	G	A
C	A	C	A	C	C	G	C	C	G	A	A	C	A	C	T	C	C	C	G	G	A	C	C	C	G	C	G	G	T	C	A	C	T	G	C	C	C	C	C	A	T	G	G	C	C	G	G	T	C
C	G	C	C	A	C	T	A	A	T	C	C	C	C	A	G	C	A	A	G	A	G	A	A	A	G	A	T	G	C	A	G	C	G	T	A	A	C	C	A	C	G	T	T	A	A	T	T	C	A
T	T	T	T	C	T	A	C	G	C	T	T	T	T	C	A	T	C	C	T	A	T	C	C	C	T	C	C	T	G	C	T	T	T	C	C	C	T	T	T	T	G	C	C	C	C	C	C	C	C
T	G	T	T	T	T	C	T	A	C	T	T	T	T	T	G	T	T	T	C	A	G	T	T	T	G	T	C	C	T	T	G	T	G	G	T	T	T	T	G	T	T	G	C	T	T	C	C	T	T
G	G	G	G	T	G	G	T	A	T	G	G	G	G	T	A	G	T	T	G	T	C	T	T	T	A	T	T	G	A	T	C	G	G	T	T	T	G	G	T	G	T	T	T	T	T	T	T	T	T
T	T	T	G	G	T	G	G	C	T	G	G	T	G	G	C	T	G	G	T	A	A	G	G	G	G	G	T	T	G	G	A	T	G	A	G	G	T	T	G	G	G	A	T	G	G	T	T	G	G
C	G	C	T	G	C	T	G	T	G	T	T	C	T	G	A	C	G	G	A	C	T	G	G	G	A	G	G	A	T	G	T	C	C	G	G	G	C	C	G	T	A	G	G	G	G	G	G	T	G
C	A	C	G	T	C	C	T	C	T	G	G	C	G	T	C	C	T	T	G	C	T	T	T	T	C	T	T	G	G	T	T	C	G	T	T	T	C	C	G	G	G	T	T	T	T	T	T	C	T
C	G	C	T	G	C	G	G	G	C	T	T	C	T	G	T	C	G	G	T	A	A	G	G	G	A	G	C	T	G	G	A	C	A	G	G	G	C	C	C	T	C	G	C	G	G	C	C	C	G
T	A	T	C	T	T	T	T	A	C	C	C	T	C	T	T	T	T	T	G	G	A	T	T	T	C	T	C	G	T	T	A	T	A	G	T	T	T	T	G	C	T	G	C	T	T	C	C	C	T
C	C	C	C	C	C	A	C	A	C	C	C	C	C	C	G	C	C	C	G	T	A	C	C	C	T	C	C	G	G	C	A	C	A	T	C	C	C	C	A	C	G	T	C	C	C	C	C	T	C
A	A	A	T	C	A	G	C	G	T	T	T	A	T	C	G	A	C	C	T	G	G	C	C	C	T	C	T	T	A	C	G	A	T	G	C	C	A	A	A	T	G	G	T	C	C	T	T	C	C
T	C	T	T	T	T	T	T	G	C	T	T	T	T	T	T	T	T	T	G	G	A	T	T	T	G	T	C	G	G	T	A	T	A	A	T	T	T	T	A	T	T	A	C	T	T	C	C	A	T
G	T	G	G	T	G	G	T	C	A	G	G	G	G	T	G	G	T	T	A	C	C	T	T	T	G	T	A	A	A	T	C	G	C	G	T	T	G	G	T	G	A	G	A	T	T	A	A	T	T
T	T	T	T	G	T	G	G	A	T	T	T	T	T	G	T	T	G	G	G	T	C	G	G	G	T	G	T	G	C	G	C	T	C	A	G	G	T	T	A	T	G	A	T	G	G	T	T	G	G
G	G	G	C	T	G	T	T	T	G	C	C	G	C	T	C	G	T	T	A	T	T	T	T	T	G	T	G	A	A	T	T	G	A	C	T	T	G	G	C	C	C	C	G	T	T	G	G	T	T
G	G	G	C	C	G	G	C	T	T	C	C	G	C	C	C	G	C	C	C	A	T	C	C	C	T	C	T	C	C	C	T	G	G	A	C	C	G	G	C	C	A	A	T	C	C	T	T	G	C
G	T	G	C	C	G	A	C	C	G	C	C	G	C	C	T	G	C	C	A	C	C	C	C	C	C	C	G	A	T	C	C	G	T	C	C	C	G	G	A	C	G	C	G	C	C	G	G	G	C
C	G	C	T	C	C	G	C	A	G	T	T	C	T	C	T	C	C	C	C	C	T	C	C	C	C	C	G	C	T	C	T	C	G	T	C	C	C	C	G	T	A	T	G	C	C	G	G	G	C
G	T	G	C	T	G	A	T	G	G	C	C	G	C	T	G	G	T	T	T	G	A	T	T	T	T	T	G	T	G	T	A	G	G	T	T	T	G	G	T	C	A	T	G	T	T	G	G	C	T
A	C	A	A	C	A	C	C	T	C	A	A	A	A	C	T	A	C	C	T	C	G	C	C	C	T	C	C	T	G	C	G	A	C	G	C	C	A	A	G	A	C	G	C	C	C	C	C	G	C
A	C	A	T	A	A	A	A	A	G	T	T	A	T	A	C	A	A	A	G	A	C	A	A	A	G	A	G	G	T	A	C	A	T	G	A	A	A	A	G	T	T	G	G	A	A	G	G	A	A
A	T	A	G	T	A	C	T	C	A	G	G	A	G	T	C	A	T	T	G	A	A	T	T	T	T	T	A	G	G	T	A	A	T	T	T	T	A	A	C	G	C	T	A	T	T	A	A	A	T
T	T	T	T	G	T	T	G	G	A	T	T	T	T	G	C	T	G	G	T	G	C	G	G	G	C	G	A	T	T	G	C	T	A	G	G	G	T	T	T	T	G	G	A	G	G	A	A	A	G
A	G	A	G	T	A	T	T	G	A	G	G	A	G	T	T	A	T	T	G	G	G	T	T	T	C	T	A	G	C	T	G	A	C	T	T	T	A	A	T	G	A	T	A	T	T	A	A	T	T
C	T	C	G	G	C	G	G	T	T	G	G	C	G	G	C	C	G	G	T	T	T	G	G	G	C	G	T	T	C	G	T	C	C	C	G	G	C	C	A	G	A	C	T	G	G	T	T	A	G
C	C	C	G	G	C	G	G	C	A	G	G	C	G	G	A	C	G	G	C	T	G	G	G	G	T	G	A	C	T	G	G	C	G	C	G	G	C	C	C	G	G	C	A	G	G	A	A	C	G
A	C	A	C	G	A	T	G	G	C	C	C	A	C	G	T	A	G	G	C	C	C	G	G	G	C	G	C	C	T	G	C	A	C	T	G	G	A	A	C	C	G	T	C	G	G	C	C	C	G
G	C	G	G	C	G	G	C	T	C	G	G	G	G	C	G	G	C	C	T	T	T	C	C	C	A	C	C	T	G	C	T	G	A	T	C	C	G	G	G	G	C	T	C	C	C	C	C	A	C
T	T	T	A	G	T	T	G	A	A	A	A	T	A	G	T	T	G	G	T	T	G	G	G	G	T	G	A	T	T	G	G	T	A	G	G	G	T	T	C	A	A	G	A	G	G	A	A	G	G
G	C	G	A	A	G	C	A	G	G	A	A	G	A	A	G	G	A	A	G	C	G	A	A	A	G	A	G	G	C	A	G	G	G	T	A	A	G	G	A	A	T	T	G	A	A	G	G	T	A
G	A	G	A	A	G	C	A	T	T	A	A	G	A	A	G	G	A	A	T	T	T	A	A	A	T	A	T	T	C	A	T	G	G	C	A	A	G	G	A	A	T	C	T	A	A	T	T	G	A
C	T	C	T	A	C	T	A	G	G	T	T	C	T	A	G	C	A	A	C	T	A	A	A	A	G	A	G	C	C	A	A	C	T	C	A	A	C	C	G	T	C	C	G	A	A	G	G	G	A
T	G	T	A	T	T	T	T	G	G	A	A	T	A	T	C	T	T	T	C	C	A	T	T	T	G	T	G	C	T	T	A	T	T	C	T	T	T	T	G	A	A	C	G	T	T	G	G	C	T
T	T	T	C	A	T	G	A	T	C	C	C	T	C	A	G	T	A	A	C	G	A	A	A	A	G	A	C	C	C	A	A	T	C	T	A	A	T	T	T	C	G	T	C	A	A	C	C	T	A
A	G	A	C	C	A	T	C	G	T	C	C	A	C	C	A	A	C	C	T	T	G	C	C	C	C	C	T	T	A	C	G	A	T	C	C	C	A	A	T	C	T	C	T	C	C	T	T	T	C
C	G	C	A	C	C	C	C	A	T	A	A	C	A	C	A	C	C	C	C	A	C	C	C	C	G	C	T	C	T	C	C	C	T	A	C	C	C	C	C	A	A	A	T	C	C	T	T	A	C
C	G	C	G	A	C	C	A	G	A	G	G	C	G	A	A	C	A	A	A	A	T	A	A	A	A	A	A	A	G	A	T	C	C	T	A	A	C	C	T	G	C	T	A	A	A	A	A	C	A
G	C	G	T	G	G	C	G	A	C	T	T	G	T	G	T	G	G	G	T	G	T	G	G	G	A	G	C	T	T	G	T	G	T	G	G	G	G	G	T	T	G	G	C	G	G	C	C	C	G
C	G	C	G	T	C	T	T	C	C	G	G	C	G	T	A	C	T	T	G	A	C	T	T	T	A	T	C	G	G	T	C	C	T	T	T	T	C	C	C	G	G	T	C	T	T	C	C	G	T
A	A	A	G	G	A	C	G	A	G	G	G	A	G	G	C	A	G	G	T	A	A	G	G	G	T	G	G	T	G	G	A	A	C	G	G	G	A	A	T	G	T	G	G	G	G	G	G	C	G
A	A	A	C	G	A	A	G	C	C	C	C	A	C	G	C	A	G	G	G	C	T	G	G	G	A	G	C	G	G	G	T	A	G	G	G	G	A	A	T	C	C	G	C	G	G	C	C	A	G
G	A	G	T	C	G	T	C	T	A	T	T	G	T	C	A	G	C	C	G	G	G	C	C	C	C	C	A	G	C	C	G	G	T	G	C	C	G	G	C	T	G	G	A	C	C	A	A	A	C
G	T	G	T	T	G	G	T	T	A	T	T	G	T	T	G	G	T	T	G	G	C	T	T	T	C	T	A	G	G	T	C	G	A	C	T	T	G	G	G	T	T	C	A	T	T	A	A	G	T
T	A	T	A	T	T	T	T	G	G	A	A	T	A	T	T	T	T	T	C	T	A	T	T	T	A	T	G	C	A	T	A	T	A	G	T	T	T	T	T	A	A	G	G	T	T	G	G	G	T
T	C	T	C	A	T	G	A	G	G	C	C	T	C	A	G	T	A	A	G	A	C	A	A	A	G	A	G	G	A	A	C	T	G	A	A	A	T	T	A	C	G	A	G	A	A	G	G	T	A
C	C	C	C	C	C	G	C	T	T	C	C	C	C	C	G	C	C	C	A	A	T	C	C	C	T	C	T	A	A	C	T	C	A	A	C	C	C	C	A	C	T	A	T	C	C	T	T	T	C
T	A	T	G	C	T	G	C	G	T	G	G	T	G	C	C	T	C	C	A	T	T	C	C	C	G	C	T	A	T	C	T	T	A	A	C	C	T	T	G	G	G	A	T	C	C	T	T	C	C
T	G	T	C	G	T	C	G	T	C	C	C	T	C	G	T	T	G	G	A	A	T	G	G	G	G	G	C	A	A	G	T	T	C	T	G	G	T	T	A	C	G	T	C	G	G	C	C	T	G
C	T	C	A	C	C	G	C	C	T	A	A	C	A	C	T	C	C	C	T	A	G	C	C	C	C	C	T	T	C	C	G	C	G	A	C	C	C	C	A	A	T	A	T	C	C	T	T	T	C
T	G	T	A	A	T	A	A	C	T	A	A	T	A	A	A	T	A	A	A	A	T	A	A	A	T	A	T	A	C	A	T	T	G	C	A	A	T	T	C	A	G	C	T	A	A	T	T	C	A
T	G	T	G	A	T	A	A	T	C	G	G	T	G	A	C	T	A	A	C	G	C	A	A	A	T	A	C	C	A	A	C	T	T	C	A	A	T	T	G	G	A	C	C	A	A	C	C	T	A
C	C	C	G	G	C	A	G	T	T	G	G	C	G	G	C	C	G	G	C	G	C	G	G	G	A	G	T	C	G	G	C	C	A	A	G	G	C	C	G	G	G	A	T	G	G	T	T	T	G
G	T	G	T	G	G	T	G	G	T	T	T	G	T	G	G	G	G	G	A	A	G	G	G	G	C	G	T	A	T	G	G	G	A	G	G	G	G	G	T	T	A	G	T	G	G	T	T	C	G
T	T	T	T	T	T	A	T	T	C	T	T	T	T	T	C	T	T	T	G	G	A	T	T	T	C	T	C	G	G	T	A	T	T	T	T	T	T	T	A	T	C	T	C	T	T	C	C	G	T
A	A	A	C	T	A	C	T	C	G	C	C	A	C	T	A	A	T	T	T	C	A	T	T	T	G	T	G	T	G	T	A	A	A	G	T	T	A	A	A	C	A	G	G	T	T	G	G	T	T
A	C	A	T	C	A	C	C	C	T	T	T	A	T	C	A	A	C	C	G	T	C	C	C	C	C	C	T	G	C	C	C	A	A	G	C	C	A	A	T	T	C	G	T	C	C	T	T	A	C
G	C	G	T	T	G	A	T	C	A	T	T	G	T	T	G	G	T	T	G	G	A	T	T	T	A	T	A	G	T	T	A	G	A	C	T	T	G	G	A	T	T	C	A	T	T	A	A	A	T
A	G	A	C	T	A	G	T	T	A	C	C	A	C	T	G	A	T	T	C	G	A	T	T	T	A	T	A	C	T	T	A	A	G	T	T	T	A	A	A	C	T	T	A	T	T	A	A	G	T
A	C	A	T	C	A	T	C	C	G	T	T	A	T	C	T	A	C	C	T	T	C	C	C	C	G	C	G	T	A	C	C	A	G	T	C	C	A	A	A	T	G	T	G	C	C	G	G	A	C
C	A	C	T	T	C	G	T	A	A	T	T	C	T	T	T	C	T	T	T	G	T	T	T	T	G	T	A	T	C	T	T	C	A	A	T	T	C	C	G	T	G	A	A	T	T	A	A	A	T
G	A	G	C	T	G	G	T	T	A	C	C	G	C	T	C	G	T	T	A	G	G	T	T	T	T	T	A	A	C	T	G	G	G	C	T	T	G	G	G	C	T	C	A	T	T	A	A	C	T
G	G	G	G	C	G	C	C	G	C	G	G	G	G	C	T	G	C	C	C	C	G	C	C	C	T	C	C	C	G	C	G	G	C	C	C	C	G	G	A	G	G	C	C	C	C	C	C	G	C
T	G	T	T	G	T	T	G	T	G	T	T	T	T	G	T	T	G	G	C	C	A	G	G	G	C	G	G	C	C	G	A	T	T	G	G	G	T	T	G	T	T	G	G	G	G	G	G	G	G
A	T	A	A	T	A	T	T	G	G	A	A	A	A	T	C	A	T	T	G	A	C	T	T	T	T	T	G	G	A	T	C	A	G	C	T	T	A	A	C	A	C	C	G	T	T	G	G	T	T
A	T	A	A	A	A	A	A	G	T	A	A	A	A	A	T	A	A	A	C	T	T	A	A	A	T	A	T	C	A	A	T	A	G	A	A	A	A	A	T	A	C	A	T	A	A	T	T	A	A
T	C	T	G	A	T	C	A	G	A	G	G	T	G	A	T	T	A	A	A	A	T	A	A	A	C	A	A	A	G	A	T	T	T	A	A	A	T	T	G	G	T	A	A	A	A	A	A	A	A
A	T	A	A	G	A	C	G	C	A	A	A	A	A	G	C	A	G	G	A	G	T	G	G	G	T	G	A	A	G	G	T	A	G	G	G	G	A	A	G	A	T	G	A	G	G	A	A	T	G
A	T	A	A	A	A	G	A	G	T	A	A	A	A	A	G	A	A	A	G	T	A	A	A	A	T	A	T	G	T	A	A	A	G	G	A	A	A	A	T	A	G	G	T	A	A	T	T	A	A
A	C	A	C	A	A	C	A	A	A	C	C	A	C	A	T	A	A	A	G	T	T	A	A	A	C	A	A	G	T	A	T	A	C	T	A	A	A	A	G	C	T	T	A	A	A	A	A	A	A
G	T	G	G	C	G	A	C	A	A	G	G	G	G	C	A	G	C	C	T	A	T	C	C	C	G	C	A	T	C	C	T	G	C	T	C	C	G	G	G	G	C	T	A	C	C	A	A	A	C
G	T	G	G	G	G	A	G	A	A	G	G	G	G	G	A	G	G	G	T	C	G	G	G	G	T	G	A	T	T	G	G	G	A	C	G	G	G	G	C	G	C	C	A	G	G	A	A	G	G
A	C	A	T	G	A	G	G	T	G	T	T	A	T	G	G	A	G	G	C	G	A	G	G	G	A	G	G	C	T	G	A	A	T	T	G	G	A	A	C	T	C	T	G	G	G	G	G	G	G
G	G	G	A	T	G	G	T	A	G	A	A	G	A	T	A	G	T	T	T	G	C	T	T	T	A	T	G	T	C	T	C	G	A	T	T	T	G	G	A	A	T	T	G	T	T	G	G	A	T
C	T	C	A	A	C	T	A	C	A	A	A	C	A	A	A	C	A	A	T	C	A	A	A	A	G	A	A	T	T	A	A	C	G	C	A	A	C	C	T	A	C	C	A	A	A	A	A	G	A
T	A	T	T	A	T	T	A	C	G	T	T	T	T	A	C	T	A	A	C	G	C	A	A	A	A	A	G	C	T	A	C	T	T	T	A	A	T	T	A	T	A	T	G	A	A	G	G	C	A
G	A	G	A	T	G	C	T	A	C	A	A	G	A	T	G	G	T	T	T	C	T	T	T	T	A	T	C	T	C	T	T	G	T	T	T	T	G	G	G	A	T	T	C	T	T	C	C	T	T
G	G	G	A	A	G	T	A	G	T	A	A	G	A	A	G	G	A	A	T	C	A	A	A	A	C	A	T	T	G	A	A	G	A	C	A	A	G	G	T	A	G	C	T	A	A	T	T	G	A
T	A	T	A	A	T	T	A	T	G	A	A	T	A	A	T	T	A	A	C	G	A	A	A	A	G	A	G	C	T	A	A	T	C	G	A	A	T	T	T	A	T	G	G	A	A	G	G	G	A
G	A	G	G	A	G	C	A	G	G	G	G	G	G	A	A	G	A	A	G	A	G	A	A	A	G	A	G	G	A	A	G	G	G	T	A	A	G	G	A	G	G	T	G	A	A	G	G	T	A
G	C	G	G	G	G	T	G	G	T	G	G	G	G	G	A	G	G	G	T	T	A	G	G	G	T	G	T	T	A	G	A	G	G	A	G	G	G	G	C	G	G	A	T	G	G	T	T	G	G
C	G	C	A	G	C	T	G	C	G	A	A	C	A	G	T	C	G	G	A	C	G	G	G	G	A	G	G	A	G	G	G	C	C	A	G	G	C	C	G	A	G	A	G	G	G	G	G	G	G
C	G	C	G	A	C	C	A	T	G	G	G	C	G	A	A	C	A	A	A	T	G	A	A	A	A	A	G	A	A	A	G	C	G	G	A	A	C	C	G	G	C	G	G	A	A	G	G	C	A
A	T	A	C	G	A	G	G	T	C	C	C	A	C	G	A	A	G	G	G	A	G	G	G	G	T	G	C	G	A	G	G	A	C	A	G	G	A	A	C	C	G	A	C	G	G	C	C	C	G
T	A	T	T	C	T	T	C	A	C	T	T	T	T	C	A	T	C	C	A	A	G	C	C	C	A	C	C	A	C	C	G	T	C	A	C	C	T	T	G	T	A	A	C	C	C	C	C	A	C
A	A	A	G	T	A	A	T	C	A	G	G	A	G	T	G	A	T	T	A	A	T	T	T	T	A	T	A	A	G	T	T	A	G	C	T	T	A	A	C	G	A	C	A	T	T	A	A	T	T
G	T	G	G	G	G	A	G	C	T	G	G	G	G	G	G	G	G	G	C	G	G	G	G	G	A	G	T	C	G	G	G	G	A	G	G	G	G	G	C	G	A	G	T	G	G	T	T	A	G
T	A	T	T	G	T	G	G	G	A	T	T	T	T	G	A	T	G	G	G	T	T	G	G	G	G	G	A	G	T	G	T	T	T	G	G	G	T	T	G	T	T	G	A	G	G	A	A	G	G
T	A	T	G	T	T	A	T	C	G	G	G	T	G	T	G	T	T	T	G	C	A	T	T	T	G	T	G	G	A	T	A	T	C	T	T	T	T	T	A	G	A	T	G	T	T	G	G	T	T
A	A	A	G	G	A	A	G	A	T	G	G	A	G	G	C	A	G	G	T	A	T	G	G	G	A	G	T	T	A	G	T	A	T	A	G	G	A	A	T	G	C	A	T	G	G	T	T	T	G
C	G	C	C	G	C	C	G	A	T	C	C	C	C	G	T	C	G	G	A	T	A	G	G	G	G	G	T	A	T	G	A	C	A	A	G	G	C	C	C	C	C	A	T	G	G	T	T	A	G
G	G	G	C	C	G	G	C	G	A	C	C	G	C	C	G	G	C	C	A	T	C	C	C	C	C	C	A	A	A	C	C	G	A	T	C	C	G	G	T	C	A	T	A	C	C	A	A	C	C
G	A	G	A	C	G	G	C	G	C	A	A	G	A	C	G	G	C	C	T	T	T	C	C	C	T	C	C	T	A	C	T	G	A	A	C	C	G	G	A	A	G	A	C	C	C	C	C	G	C
C	G	C	T	A	C	T	A	T	G	T	T	C	T	A	T	C	A	A	A	G	G	A	A	A	G	A	G	A	A	A	G	C	G	A	A	A	C	C	A	T	T	A	G	A	A	G	G	G	A
G	C	G	A	T	G	A	T	T	G	A	A	G	A	T	G	G	T	T	A	A	C	T	T	T	G	T	G	A	G	T	C	G	T	A	T	T	G	G	A	A	G	A	G	T	T	G	G	C	T
C	T	C	G	A	C	A	A	C	C	G	G	C	G	A	G	C	A	A	A	C	T	A	A	A	T	A	C	A	G	A	T	C	C	G	A	A	C	C	G	G	G	G	C	A	A	C	C	G	A
C	G	C	T	G	C	T	G	T	G	T	T	C	T	G	C	C	G	G	G	T	G	G	G	G	G	G	G	G	A	G	G	C	A	G	G	G	C	C	T	T	C	G	G	G	G	G	G	C	G
G	G	G	T	T	G	A	T	T	C	T	T	G	T	T	C	G	T	T	G	T	C	T	T	T	G	T	C	G	G	T	C	G	T	A	T	T	G	G	C	T	T	A	C	T	T	C	C	C	T
A	T	A	A	T	A	A	T	C	C	A	A	A	A	T	A	A	T	T	A	A	C	T	T	T	C	T	C	A	C	T	C	A	T	G	T	T	A	A	A	A	T	G	C	T	T	C	C	G	T
T	G	T	C	A	T	A	A	T	G	C	C	T	C	A	T	T	A	A	G	G	G	A	A	A	C	A	G	G	T	A	G	T	T	C	A	A	T	T	T	C	A	C	G	A	A	G	G	A	A
C	G	C	G	C	C	G	C	T	A	G	G	C	G	C	A	C	C	C	C	G	T	C	C	C	A	C	A	C	G	C	T	C	G	T	C	C	C	C	T	G	C	T	A	C	C	A	A	T	C
T	C	T	G	G	T	G	G	C	T	G	G	T	G	G	G	T	G	G	T	C	G	G	G	G	T	G	T	T	G	G	G	T	A	G	G	G	T	T	T	G	C	G	T	G	G	T	T	C	G
A	C	A	C	G	A	A	G	G	C	C	C	A	C	G	T	A	G	G	G	G	A	G	G	G	A	G	C	G	T	G	A	A	C	G	G	G	A	A	G	C	G	G	C	G	G	C	C	T	G
A	A	A	G	C	A	G	C	T	T	G	G	A	G	C	T	A	C	C	G	A	A	C	C	C	G	C	T	G	G	C	A	A	T	T	C	C	A	A	A	G	C	T	T	C	C	T	T	A	C
A	T	A	C	G	A	C	G	A	A	C	C	A	C	G	A	A	G	G	T	C	C	G	G	G	T	G	A	T	G	G	C	A	T	G	G	G	A	A	C	C	A	G	A	G	G	A	A	A	G
G	A	G	C	C	G	T	C	A	A	C	C	G	C	C	C	G	C	C	G	G	A	C	C	C	T	C	A	G	C	C	A	G	A	G	C	C	G	G	T	C	A	G	A	C	C	A	A	A	C
T	G	T	G	C	T	G	C	G	A	G	G	T	G	C	G	T	C	C	G	A	T	C	C	C	A	C	A	G	C	C	T	T	G	C	C	C	T	T	T	G	G	C	A	C	C	A	A	G	C
C	T	C	A	G	C	G	G	A	G	A	A	C	A	G	G	C	G	G	C	G	G	G	G	G	C	G	G	C	A	G	G	C	G	C	G	G	C	C	A	A	G	C	G	G	G	G	G	T	G
A	T	A	T	A	A	T	A	A	T	T	T	A	T	A	C	A	A	A	C	C	A	A	A	A	G	A	T	C	T	A	A	A	C	A	A	A	A	A	G	T	T	A	T	A	A	T	T	C	A
T	A	T	C	T	T	G	T	C	C	C	C	T	C	T	G	T	T	T	A	T	G	T	T	T	G	T	C	A	A	T	G	T	G	T	T	T	T	T	G	C	T	T	C	T	T	C	C	A	T
T	C	T	T	C	T	G	C	G	A	T	T	T	T	C	C	T	C	C	T	T	C	C	C	C	C	C	A	T	G	C	C	T	A	A	C	C	T	T	C	T	C	A	A	C	C	A	A	T	C
T	G	T	A	T	T	C	T	G	T	A	A	T	A	T	C	T	T	T	A	G	A	T	T	T	G	T	T	A	T	T	A	T	C	G	T	T	T	T	G	A	T	G	T	T	T	T	T	T	T
G	G	G	A	A	G	C	A	T	T	A	A	G	A	A	G	G	A	A	G	G	T	A	A	A	C	A	T	G	T	A	T	G	G	T	A	A	G	G	A	A	T	T	T	A	A	T	T	T	A
A	C	A	A	A	A	A	A	A	T	A	A	A	A	A	A	A	A	A	T	C	G	A	A	A	C	A	T	T	A	A	G	A	A	T	A	A	A	A	C	A	C	T	T	A	A	T	T	G	A
C	G	C	G	A	C	T	A	A	G	G	G	C	G	A	T	C	A	A	T	A	A	A	A	A	G	A	G	T	C	A	A	C	G	A	A	A	C	C	G	G	T	A	G	A	A	G	G	A	A
T	C	T	T	G	T	A	G	T	A	T	T	T	T	G	C	T	G	G	A	C	A	G	G	G	A	G	A	A	G	G	A	T	C	C	G	G	T	T	A	T	T	C	A	G	G	A	A	C	G
T	C	T	C	T	T	G	T	A	C	C	C	T	C	T	T	T	T	T	C	T	A	T	T	T	T	T	C	C	G	T	A	T	T	G	T	T	T	T	G	C	C	G	C	T	T	C	C	T	T
A	G	A	A	C	A	T	C	A	T	A	A	A	A	C	A	A	C	C	G	G	T	C	C	C	C	C	T	G	C	C	T	A	T	G	C	C	A	A	C	A	G	G	T	C	C	T	T	T	C
G	A	G	T	A	G	T	A	A	T	T	T	G	T	A	A	G	A	A	G	A	T	A	A	A	T	A	T	G	G	A	T	G	G	C	A	A	G	G	T	T	T	C	T	A	A	T	T	A	A
G	T	G	T	T	G	A	T	G	A	T	T	G	T	T	A	G	T	T	C	T	G	T	T	T	A	T	A	C	C	T	G	G	G	G	T	T	G	G	T	T	A	G	A	T	T	A	A	G	T
C	C	C	T	T	C	C	T	G	G	T	T	C	T	T	G	C	T	T	G	C	C	T	T	T	A	T	G	G	C	T	C	C	C	C	T	T	C	C	G	T	A	C	G	T	T	G	G	G	T
G	T	G	G	T	G	G	T	A	G	G	G	G	G	T	T	G	T	T	C	C	T	T	T	T	A	T	G	C	G	T	T	G	A	C	T	T	G	G	G	G	G	C	G	T	T	G	G	C	T
A	A	A	A	G	A	G	G	G	C	A	A	A	A	G	C	A	G	G	C	T	T	G	G	G	G	G	C	C	A	G	T	A	C	G	G	G	A	A	C	A	A	G	C	G	G	C	C	G	G
C	A	C	C	A	C	C	A	C	G	C	C	C	C	A	A	C	A	A	G	T	G	A	A	A	T	A	G	G	T	A	G	C	T	A	A	A	C	C	A	C	A	A	G	A	A	G	G	A	A
G	A	G	T	C	G	G	C	T	A	T	T	G	T	C	T	G	C	C	A	A	G	C	C	C	C	C	A	A	C	C	G	G	G	T	C	C	G	G	C	T	C	T	A	C	C	A	A	C	C
A	G	A	T	T	A	C	T	G	C	T	T	A	T	T	T	A	T	T	T	T	T	T	T	T	A	T	C	T	T	T	T	A	A	C	T	T	A	A	T	T	G	C	C	T	T	C	C	G	T
G	T	G	A	T	G	C	T	G	G	A	A	G	A	T	T	G	T	T	C	G	A	T	T	T	T	T	G	C	A	T	A	G	T	T	T	T	G	G	G	A	G	T	G	T	T	G	G	A	T
C	C	C	G	A	C	G	A	T	A	G	G	C	G	A	G	C	A	A	T	A	C	A	A	A	T	A	A	T	A	A	C	C	C	A	A	A	C	C	A	G	T	A	A	A	A	A	A	G	A
T	A	T	G	G	T	A	G	G	G	G	G	T	G	G	A	T	G	G	A	A	A	G	G	G	T	G	G	A	A	G	A	T	C	A	G	G	T	T	T	G	A	A	G	G	G	G	G	C	G
T	T	T	C	G	T	T	G	G	C	C	C	T	C	G	C	T	G	G	A	G	C	G	G	G	G	G	C	A	G	G	C	T	T	A	G	G	T	T	C	C	A	A	C	G	G	C	C	T	G
G	T	G	G	C	G	C	C	C	T	G	G	G	G	C	T	G	C	C	A	A	G	C	C	C	A	C	T	A	T	C	G	G	T	G	C	C	G	G	C	G	T	G	T	C	C	T	T	T	C
G	T	G	A	G	G	T	G	C	T	A	A	G	A	G	T	G	G	G	G	T	G	G	G	G	C	G	T	G	C	G	G	G	A	T	G	G	G	G	T	A	A	T	T	G	G	T	T	G	G
C	G	C	C	A	C	A	A	A	G	C	C	C	C	A	A	C	A	A	T	T	A	A	A	A	T	A	G	T	A	A	A	C	T	C	A	A	C	C	T	C	A	C	G	A	A	G	G	G	A
A	A	A	G	C	A	A	C	T	G	G	G	A	G	C	G	A	C	C	C	T	A	C	C	C	T	C	G	C	T	C	A	A	G	A	C	C	A	A	A	G	A	A	G	C	C	G	G	C	C
C	C	C	A	G	C	A	G	A	C	A	A	C	A	G	G	C	G	G	A	T	C	G	G	G	A	G	C	A	T	G	C	C	A	T	G	G	C	C	T	A	G	T	C	G	G	C	C	A	G
T	T	T	G	A	T	G	A	G	A	G	G	T	G	A	C	T	A	A	T	C	G	A	A	A	G	A	A	T	T	A	G	T	A	T	A	A	T	T	G	G	G	T	A	A	A	A	A	C	A
G	T	G	C	G	G	T	G	T	C	C	C	G	C	G	G	G	G	G	T	A	T	G	G	G	G	G	C	T	G	G	T	G	G	T	G	G	G	G	A	C	A	T	C	G	G	C	C	T	G
A	A	A	T	C	A	C	C	T	T	T	T	A	T	C	A	A	C	C	T	A	T	C	C	C	C	C	T	T	A	C	T	A	A	G	C	C	A	A	A	T	G	G	T	C	C	T	T	G	C
T	G	T	T	T	T	A	T	A	G	T	T	T	T	T	C	T	T	T	G	G	C	T	T	T	G	T	G	G	C	T	C	T	T	A	T	T	T	T	G	T	C	A	G	T	T	G	G	A	T
C	G	C	G	T	C	T	T	C	A	G	G	C	G	T	G	C	T	T	A	A	T	T	T	T	A	T	A	A	T	T	T	C	T	C	T	T	C	C	A	G	T	C	A	T	T	A	A	T	T
C	C	C	G	G	C	T	G	G	T	G	G	C	G	G	A	C	G	G	C	A	G	G	G	G	C	G	T	C	T	G	N	C	T	T	G	G	C	C	T	G	G	T	T	G	G	T	T	C	G
T	G	T	C	G	T	T	G	G	C	C	C	T	C	G	G	T	G	G	T	A	A	G	G	G	G	G	C	T	A	G	A	T	T	T	G	G	T	T	T	C	G	T	C	G	G	C	C	C	G
T	A	T	A	C	T	G	C	C	C	A	A	T	A	C	C	T	C	C	T	A	A	C	C	C	A	C	C	T	G	C	A	T	C	A	C	C	T	T	T	A	T	A	C	C	C	C	C	T	C
A	C	A	C	A	A	A	A	G	T	C	C	A	C	A	T	A	A	A	A	C	A	A	A	A	G	A	T	A	G	A	A	A	A	G	A	A	A	A	T	C	G	G	T	A	A	T	T	T	A
T	G	T	T	C	T	C	C	C	T	T	T	T	T	C	T	T	C	C	G	T	A	C	C	C	C	C	T	G	C	C	A	T	A	G	C	C	T	T	C	T	G	G	T	C	C	T	T	A	C
G	A	G	G	T	G	T	T	C	A	G	G	G	G	T	G	G	T	T	G	G	G	T	T	T	T	T	A	G	G	T	G	G	G	C	T	T	G	G	A	G	C	C	A	T	T	A	A	T	T
A	G	A	A	G	A	T	G	G	T	A	A	A	A	G	G	A	G	G	C	G	A	G	G	G	T	G	T	C	A	G	A	A	A	G	G	G	A	A	A	A	C	G	T	G	G	T	T	G	G
A	C	A	T	A	A	A	A	A	G	T	T	A	T	A	C	A	A	A	G	A	G	A	A	A	G	A	G	G	C	A	G	A	A	A	A	A	A	A	G	T	A	A	G	A	A	G	G	A	A
G	T	G	C	T	G	G	T	T	A	C	C	G	C	T	A	G	T	T	A	A	C	T	T	T	G	T	A	A	G	T	C	G	A	C	T	T	G	G	A	C	T	C	A	T	T	A	A	A	T
A	T	A	C	C	A	G	C	C	A	C	C	A	C	C	C	A	C	C	C	C	T	C	C	C	C	C	A	C	A	C	T	A	A	G	C	C	A	A	A	C	A	G	A	C	C	A	A	G	C
T	G	T	T	C	T	C	C	T	G	T	T	T	T	C	T	T	C	C	G	A	A	C	C	C	A	C	G	G	G	C	A	T	C	A	C	C	T	T	A	T	G	A	G	C	C	G	G	A	C
T	G	T	T	T	T	G	T	A	A	T	T	T	T	T	G	T	T	T	A	C	T	T	T	T	C	T	A	A	C	T	T	T	T	G	T	T	T	T	A	T	T	G	A	T	T	A	A	T	T
T	C	T	A	T	T	A	T	A	T	A	A	T	A	T	A	T	T	T	G	T	G	T	T	T	T	T	T	G	T	T	G	T	G	C	T	T	T	T	C	A	T	C	T	T	T	T	T	T	T
T	A	T	T	A	T	C	A	A	T	T	T	T	T	A	T	T	A	A	C	A	A	A	A	A	G	A	T	C	T	A	A	T	G	T	A	A	T	T	T	T	A	T	T	A	A	T	T	T	A
C	C	C	G	T	C	G	T	G	T	G	G	C	G	T	C	C	T	T	T	A	A	T	T	T	A	T	T	T	G	T	A	C	A	T	T	T	C	C	G	G	C	T	T	T	T	T	T	T	T
A	T	A	A	G	A	A	G	T	T	A	A	A	A	G	C	A	G	G	T	A	T	G	G	G	T	G	T	T	G	G	T	A	A	G	G	G	A	A	G	A	G	G	T	G	G	T	T	C	G
A	G	A	A	A	A	G	A	C	C	A	A	A	A	A	T	A	A	A	G	C	T	A	A	A	C	A	C	G	C	A	T	A	C	G	A	A	A	A	A	A	G	G	C	A	A	C	C	A	A
G	A	G	G	A	G	C	A	A	A	G	G	G	G	A	T	G	A	A	G	A	G	A	A	A	C	A	A	G	A	A	G	G	A	C	A	A	G	G	A	G	C	C	A	A	A	A	A	A	A
A	T	A	A	G	A	T	G	T	A	A	A	A	A	G	A	A	G	G	C	T	C	G	G	G	T	G	A	C	C	G	C	A	C	A	G	G	A	A	C	A	G	A	A	G	G	A	A	G	G
A	C	A	T	A	A	T	A	T	G	T	T	A	T	A	T	A	A	A	A	A	A	A	A	A	T	A	G	A	T	A	A	A	T	C	A	A	A	A	A	T	C	C	G	A	A	G	G	A	A
A	C	A	T	T	A	G	T	T	A	T	T	A	T	T	G	A	T	T	C	G	G	T	T	T	A	T	A	C	G	T	G	A	A	T	T	T	A	A	C	T	C	T	A	T	T	A	A	A	T
A	T	A	T	T	A	G	T	G	A	T	T	A	T	T	A	A	T	T	T	C	A	T	T	T	T	T	A	T	A	T	A	A	A	G	T	T	A	A	T	T	G	G	A	T	T	A	A	A	T
C	T	C	T	T	C	C	T	A	A	T	T	C	T	T	A	C	T	T	G	A	C	T	T	T	G	T	A	G	T	T	C	C	A	A	T	T	C	C	A	T	A	A	A	T	T	A	A	A	T
T	A	T	C	T	T	A	T	C	A	C	C	T	C	T	G	T	T	T	A	G	A	T	T	T	A	T	A	A	C	T	A	T	C	T	T	T	T	T	A	C	T	T	A	T	T	A	A	C	T
G	T	G	A	C	G	C	C	T	C	A	A	G	A	C	A	G	C	C	T	T	C	C	C	C	A	C	C	T	C	C	C	G	A	C	C	C	G	G	A	A	C	C	C	C	C	C	C	T	C
G	G	G	A	A	G	T	A	T	T	A	A	G	A	A	T	G	A	A	C	G	C	A	A	A	G	A	T	C	T	A	C	G	T	C	A	A	G	G	C	A	T	C	T	A	A	T	T	G	A
A	A	A	G	A	A	G	A	A	G	G	G	A	G	A	T	A	A	A	C	G	T	A	A	A	A	A	G	C	T	A	T	A	A	T	A	A	A	A	A	G	A	T	G	A	A	G	G	G	A
A	A	A	A	G	A	A	G	G	G	A	A	A	A	G	T	A	G	G	T	T	T	G	G	G	T	G	G	T	A	G	T	A	G	T	G	G	A	A	T	A	A	T	G	G	G	G	G	A	G
C	G	C	A	A	C	T	A	G	A	A	A	C	A	A	T	C	A	A	T	G	T	A	A	A	T	A	A	T	T	A	T	C	C	A	A	A	C	C	A	A	A	A	A	A	A	A	A	A	A
A	A	A	A	A	A	C	A	C	A	A	A	A	A	A	C	A	A	A	A	T	T	A	A	A	T	A	A	A	G	A	T	A	A	T	A	A	A	A	G	A	G	T	A	A	A	A	A	C	A
C	T	C	A	A	C	C	A	G	C	A	A	C	A	A	A	C	A	A	T	T	G	A	A	A	T	A	C	T	A	A	G	C	G	G	A	A	C	C	C	A	T	G	C	A	A	C	C	A	A
T	T	T	C	A	T	T	A	A	A	C	C	T	C	A	A	T	A	A	G	A	A	A	A	A	C	A	A	G	A	A	A	T	T	A	A	A	T	T	A	C	C	A	A	A	A	A	A	C	A
A	T	A	T	C	A	T	C	C	C	T	T	A	T	C	G	A	C	C	A	C	A	C	C	C	A	C	C	A	G	C	A	A	G	A	C	C	A	A	G	T	A	A	C	C	C	C	C	T	C
A	T	A	G	T	A	A	T	G	T	G	G	A	G	T	A	A	T	T	A	C	A	T	T	T	A	T	T	A	A	T	A	A	G	G	T	T	A	A	T	G	T	G	T	T	T	T	T	A	T
A	C	A	G	G	A	T	G	A	A	G	G	A	G	G	A	A	G	G	G	C	T	G	G	G	G	G	A	G	T	G	T	A	T	A	G	G	A	A	G	G	T	A	A	G	G	A	A	A	G
C	A	C	A	G	C	G	G	G	A	A	A	C	A	G	A	C	G	G	A	G	T	G	G	G	A	G	A	A	T	G	T	C	G	T	G	G	C	C	G	A	T	T	A	G	G	A	A	A	G
A	A	A	A	A	A	A	A	C	A	A	A	A	A	A	A	A	A	A	T	T	A	A	A	A	A	A	A	T	T	A	A	A	T	T	A	A	A	A	T	A	G	T	A	A	A	A	A	C	A
T	G	T	C	A	T	A	A	T	C	C	C	T	C	A	C	T	A	A	T	G	A	A	A	A	A	A	C	T	T	A	A	T	T	T	A	A	T	T	G	C	A	T	C	A	A	C	C	A	A
A	A	A	A	C	A	G	C	T	A	A	A	A	A	C	T	A	C	C	T	A	A	C	C	C	A	C	A	T	C	C	A	A	A	T	C	C	A	A	T	A	C	T	A	C	C	A	A	T	C
G	A	G	C	A	G	A	A	G	T	C	C	G	C	A	G	G	A	A	T	A	T	A	A	A	C	A	T	T	A	A	T	G	C	C	A	A	G	G	T	C	T	C	T	A	A	T	T	A	A
C	A	C	T	C	C	T	C	G	A	T	T	C	T	C	G	C	C	C	C	C	T	C	C	C	T	C	A	C	A	C	T	C	C	A	C	C	C	C	A	T	T	A	A	C	C	A	A	G	C
A	A	A	A	T	A	T	T	C	G	A	A	A	A	T	A	A	T	T	A	T	G	T	T	T	G	T	G	A	G	T	G	A	C	A	T	T	A	A	C	A	A	A	G	T	T	G	G	C	T
G	C	G	A	A	G	T	A	A	C	A	A	G	A	A	A	G	A	A	A	C	G	A	A	A	G	A	C	A	A	A	G	G	G	G	A	A	G	G	C	A	G	G	C	A	A	C	C	A	A
T	T	T	A	A	T	T	A	C	A	A	A	T	A	A	C	T	A	A	G	A	C	A	A	A	A	A	A	G	A	A	C	T	T	A	A	A	T	T	C	A	G	A	A	A	A	A	A	G	A
G	G	G	C	A	G	C	A	T	G	C	C	G	C	A	A	G	A	A	A	T	A	A	A	A	A	A	G	A	A	A	A	G	G	A	A	A	G	G	G	C	C	A	G	A	A	G	G	T	A
G	G	G	A	C	G	A	C	G	T	A	A	G	A	C	C	G	C	C	A	G	A	C	C	C	C	C	T	A	A	C	A	G	A	A	C	C	G	G	T	A	G	A	T	C	C	T	T	G	C
T	A	T	T	A	T	A	A	A	G	T	T	T	T	A	T	T	A	A	A	C	A	A	A	A	A	A	G	A	C	A	A	T	A	A	A	A	T	T	G	T	A	A	G	A	A	G	G	G	A
G	A	G	A	T	G	G	T	T	G	A	A	G	A	T	A	G	T	T	A	G	G	T	T	T	C	T	G	A	T	T	G	G	C	C	T	T	G	G	A	A	C	C	G	T	T	G	G	T	T
T	C	T	G	A	T	A	A	C	T	G	G	T	G	A	A	T	A	A	C	T	A	A	A	A	T	A	T	C	G	A	A	T	T	T	A	A	T	T	A	G	G	T	T	A	A	T	T	G	A
T	A	T	C	G	T	A	G	C	G	C	C	T	C	G	A	T	G	G	T	G	A	G	G	G	A	G	G	T	G	G	A	T	C	G	G	G	T	T	C	C	A	G	G	G	G	G	G	T	G
A	C	A	A	C	A	A	C	T	T	A	A	A	A	C	C	A	C	C	G	A	A	C	C	C	A	C	T	G	A	C	A	A	A	G	C	C	A	A	T	A	G	G	T	C	C	T	T	T	C
C	T	C	G	A	C	A	A	T	T	G	G	C	G	A	A	C	A	A	G	G	T	A	A	A	A	A	T	G	A	A	T	C	T	A	A	A	C	C	C	G	C	A	T	A	A	T	T	A	A
C	A	C	T	G	C	C	G	A	A	T	T	C	T	G	T	C	G	G	A	C	T	G	G	G	C	G	A	A	C	G	T	C	G	A	G	G	C	C	A	T	T	A	A	G	G	A	A	C	G
C	A	C	G	T	C	T	T	T	C	G	G	C	G	T	A	C	T	T	A	T	T	T	T	T	A	T	C	A	A	T	T	C	C	C	T	T	C	C	T	G	T	C	C	T	T	C	C	C	T
G	A	G	G	G	G	G	G	G	C	G	G	G	G	G	G	G	G	G	C	T	G	G	G	G	T	G	C	C	C	G	G	G	G	A	G	G	G	G	G	G	G	A	C	G	G	C	C	C	G
T	C	T	T	G	T	G	G	A	C	T	T	T	T	G	C	T	G	G	A	A	A	G	G	G	A	G	C	A	T	G	A	T	T	C	G	G	T	T	C	T	G	C	C	G	G	C	C	G	G
G	A	G	G	T	G	A	T	A	G	G	G	G	G	T	A	G	T	T	C	A	C	T	T	T	G	T	G	C	A	T	C	G	G	T	T	T	G	G	G	G	C	T	G	T	T	G	G	T	T
A	T	A	T	G	A	A	G	G	T	T	T	A	T	G	G	A	G	G	T	C	A	G	G	G	C	G	T	T	A	G	A	A	A	A	G	G	A	A	T	T	A	A	T	G	G	T	T	G	G
A	A	A	T	T	A	C	T	A	G	T	T	A	T	T	T	A	T	T	A	G	C	T	T	T	A	T	G	A	A	T	C	A	G	A	T	T	A	A	G	T	C	A	G	T	T	G	G	A	T
C	G	C	A	T	C	A	T	T	A	A	A	C	A	T	G	C	T	T	A	G	C	T	T	T	G	T	A	A	C	T	C	C	C	A	T	T	C	C	A	A	T	A	A	T	T	A	A	A	T
T	C	T	C	A	T	C	A	T	A	C	C	T	C	A	G	T	A	A	A	A	T	A	A	A	T	A	A	A	A	A	T	T	T	C	A	A	T	T	G	C	G	C	A	A	A	A	A	C	A
C	A	C	C	C	C	T	C	T	C	C	C	C	C	C	T	C	C	C	C	G	T	C	C	C	G	C	C	C	T	C	T	C	T	A	C	C	C	C	C	C	A	A	C	C	C	C	C	T	C
A	G	A	C	C	A	A	C	T	T	C	C	A	C	C	G	A	C	C	A	G	C	C	C	C	G	C	T	A	A	C	C	A	A	T	C	C	A	A	T	C	T	T	T	C	C	T	T	C	C
T	T	T	G	C	T	A	C	C	C	G	G	T	G	C	T	T	C	C	T	G	A	C	C	C	T	C	C	T	G	C	A	T	A	A	C	C	T	T	T	G	C	A	C	C	C	C	C	A	C
G	G	G	T	G	G	A	G	A	A	T	T	G	T	G	T	G	G	G	A	G	A	G	G	G	G	G	A	A	C	G	A	G	C	G	G	G	G	G	A	T	C	G	A	G	G	A	A	T	G
C	G	C	G	T	C	C	T	A	T	G	G	C	G	T	A	C	T	T	G	C	T	T	T	T	T	T	T	G	A	T	T	C	G	C	T	T	C	C	A	G	T	C	T	T	T	T	T	G	T
G	T	G	A	G	G	A	G	G	G	A	A	G	A	G	C	G	G	G	C	A	G	G	G	G	T	G	G	C	G	G	G	G	G	A	G	G	G	G	C	A	T	A	G	G	G	G	G	C	G
T	G	T	A	A	T	T	A	A	C	A	A	T	A	A	C	T	A	A	A	T	G	A	A	A	A	A	C	A	T	A	G	T	A	G	A	A	T	T	G	A	A	G	C	A	A	C	C	G	A
G	T	G	C	A	G	A	A	A	G	C	C	G	C	A	C	G	A	A	G	A	G	A	A	A	C	A	G	G	G	A	G	G	G	T	A	A	G	G	G	C	T	T	G	A	A	G	G	T	A
A	T	A	T	C	A	G	C	A	T	T	T	A	T	C	G	A	C	C	T	C	G	C	C	C	C	C	T	T	G	C	G	A	G	G	C	C	A	A	A	T	G	G	T	C	C	T	T	G	C
G	A	G	C	T	G	C	T	A	G	C	C	G	C	T	T	G	T	T	G	A	A	T	T	T	C	T	G	G	T	T	A	G	G	G	T	T	G	G	G	C	A	G	G	T	T	G	G	A	T
C	C	C	A	C	C	A	C	C	A	A	A	C	A	C	G	C	C	C	G	C	A	C	C	C	G	C	A	G	G	C	A	C	G	T	C	C	C	C	G	A	A	T	A	C	C	A	A	G	C
T	C	T	T	A	T	G	A	T	G	T	T	T	T	A	A	T	A	A	T	T	T	A	A	A	T	A	G	T	T	A	T	T	C	G	A	A	T	T	G	T	G	G	G	A	A	G	G	C	A
T	C	T	G	T	T	T	T	G	C	G	G	T	G	T	A	T	T	T	G	C	G	T	T	T	G	T	C	G	T	T	G	T	A	T	T	T	T	T	G	G	A	T	C	T	T	C	C	T	T
A	G	A	C	G	A	G	G	G	T	C	C	A	C	G	C	A	G	G	T	G	T	G	G	G	A	G	T	T	A	G	T	A	T	T	G	G	A	A	C	C	T	T	T	G	G	T	T	T	G
A	T	A	G	C	A	G	C	A	T	G	G	A	G	C	T	A	C	C	T	C	C	C	C	C	A	C	T	T	C	C	C	A	A	A	C	C	A	A	A	G	T	A	T	C	C	T	T	A	C
C	G	C	T	G	C	T	G	A	A	T	T	C	T	G	C	C	G	G	A	T	C	G	G	G	C	G	A	A	C	G	C	C	C	C	G	G	C	C	T	T	T	C	A	G	G	A	A	A	G
G	A	G	G	T	G	G	T	C	A	G	G	G	G	T	A	G	T	T	C	A	A	T	T	T	T	T	A	C	C	T	A	G	A	C	T	T	G	G	A	G	T	C	A	T	T	A	A	C	T
G	A	G	A	G	G	T	G	A	C	A	A	G	A	G	T	G	G	G	C	T	A	G	G	G	C	G	C	C	G	G	A	G	C	C	G	G	G	G	C	A	C	C	C	G	G	C	C	G	G
A	C	A	G	A	A	T	A	C	G	G	G	A	G	A	G	A	A	A	C	G	A	A	A	A	A	A	G	C	T	A	A	A	T	G	A	A	A	A	A	G	A	G	G	A	A	G	G	G	A
G	T	G	C	G	G	A	G	T	G	C	C	G	C	G	C	G	G	G	G	T	T	G	G	G	T	G	G	G	G	G	T	G	C	T	G	G	G	G	C	C	A	T	G	G	G	G	G	A	G
G	C	G	T	C	G	C	C	A	A	T	T	G	T	C	G	G	C	C	T	C	T	C	C	C	G	C	A	T	A	C	T	G	G	G	C	C	G	G	T	T	G	G	A	C	C	A	A	G	C
G	A	G	T	T	G	C	T	A	G	T	T	G	T	T	T	G	T	T	G	G	T	T	T	T	C	T	G	G	A	T	T	G	C	A	T	T	G	G	C	T	A	A	G	T	T	G	G	G	T
G	T	G	A	T	G	C	T	A	G	A	A	G	A	T	G	G	T	T	A	A	T	T	T	T	G	T	G	A	C	T	T	G	T	A	T	T	G	G	G	A	A	A	G	T	T	G	G	G	T
C	G	C	A	A	C	G	A	C	G	A	A	C	A	A	A	C	A	A	A	T	G	A	A	A	T	A	G	A	T	A	G	C	A	C	A	A	C	C	C	A	A	C	G	A	A	G	G	G	A
A	C	A	C	A	A	T	A	A	G	C	C	A	C	A	G	A	A	A	C	A	T	A	A	A	G	A	G	C	C	A	T	A	T	T	A	A	A	A	T	C	A	T	G	A	A	G	G	C	A
T	G	T	G	C	T	G	C	T	C	G	G	T	G	C	C	T	C	C	T	A	A	C	C	C	A	C	C	T	A	C	A	T	G	C	C	C	T	T	A	G	C	C	C	C	C	C	C	A	C
A	T	A	G	G	A	A	G	A	A	G	G	A	G	G	T	A	G	G	C	C	T	G	G	G	G	G	A	C	T	G	T	A	T	A	G	G	A	A	T	G	T	A	A	G	G	A	A	T	G
C	G	C	A	G	C	A	G	G	T	A	A	C	A	G	T	C	G	G	A	A	T	G	G	G	C	G	T	A	G	G	T	C	C	T	G	G	C	C	G	A	G	T	T	G	G	T	T	A	G
A	A	A	G	A	A	C	A	C	A	G	G	A	G	A	A	A	A	A	T	A	T	A	A	A	T	A	A	T	C	A	T	A	G	G	A	A	A	A	T	G	G	G	A	A	A	A	A	C	A
C	G	C	G	G	C	T	G	A	C	G	G	C	G	G	A	C	G	G	G	C	C	G	G	G	T	G	C	G	G	G	C	C	A	C	G	G	C	C	C	G	A	C	C	G	G	C	C	A	G
T	C	T	G	G	T	C	G	G	A	G	G	T	G	G	C	T	G	G	C	T	C	G	G	G	A	G	A	C	T	G	C	T	T	G	G	G	T	T	G	G	A	G	A	G	G	A	A	C	G
C	T	C	G	G	C	A	G	T	C	G	G	C	G	G	G	C	G	G	G	T	C	G	G	G	A	G	C	G	G	G	C	C	A	T	G	G	C	C	A	G	C	T	C	G	G	C	C	T	G
G	T	G	C	G	G	T	G	G	T	C	C	G	C	G	G	G	G	G	T	C	T	G	G	G	C	G	T	T	A	G	T	G	A	G	G	G	G	G	T	C	A	G	T	G	G	T	T	C	G
C	A	C	A	C	C	G	C	G	C	A	A	C	A	C	A	C	C	C	G	T	T	C	C	C	G	C	C	G	G	C	T	C	C	A	C	C	C	C	A	A	C	A	C	C	C	C	C	G	C
T	A	T	T	A	T	C	A	T	G	T	T	T	T	A	G	T	A	A	A	G	A	A	A	A	G	A	G	A	C	A	A	T	A	G	A	A	T	T	A	T	T	G	G	A	A	G	G	C	A
A	C	A	A	T	A	G	T	G	C	A	A	A	A	T	G	A	T	T	G	T	A	T	T	T	A	T	C	G	T	T	A	A	A	C	T	T	A	A	C	A	A	C	C	T	T	C	C	T	T
T	G	T	C	A	T	T	A	T	T	C	C	T	C	A	G	T	A	A	C	G	A	A	A	A	G	A	T	C	T	A	A	T	C	T	A	A	T	T	A	C	A	T	T	A	A	T	T	A	A
G	G	G	A	C	G	G	C	T	A	A	A	G	A	C	G	G	C	C	T	G	T	C	C	C	G	C	A	T	A	C	T	G	T	T	C	C	G	G	A	A	A	T	A	C	C	A	A	T	C
T	A	T	C	A	T	A	A	A	T	C	C	T	C	A	C	T	A	A	T	C	T	A	A	A	G	A	T	T	A	A	T	T	T	A	A	A	T	T	C	C	C	A	T	A	A	T	T	G	A
C	G	C	T	C	C	G	C	C	G	T	T	C	T	C	A	C	C	C	A	C	C	C	C	C	G	C	G	A	C	C	C	C	C	A	C	C	C	C	T	T	A	A	G	C	C	G	G	T	C
G	G	G	C	T	G	C	T	C	T	C	C	G	C	T	T	G	T	T	A	C	C	T	T	T	C	T	T	A	G	T	C	G	T	C	T	T	G	G	T	C	T	C	T	T	T	T	T	C	T
A	G	A	G	C	A	T	C	C	C	G	G	A	G	C	A	A	C	C	C	T	A	C	C	C	A	C	C	C	G	C	A	A	G	G	C	C	A	A	C	G	A	G	C	C	C	C	C	G	C
T	G	T	C	G	T	T	G	G	G	C	C	T	C	G	C	T	G	G	G	G	T	G	G	G	T	G	G	G	A	G	T	T	T	G	G	G	T	T	T	C	G	G	G	G	G	G	G	A	G
A	C	A	T	C	A	A	C	T	A	T	T	A	T	C	A	A	C	C	G	A	A	C	C	C	A	C	A	G	G	C	A	A	G	A	C	C	A	A	G	T	C	A	A	C	C	A	A	T	C
A	A	A	A	T	A	A	T	G	T	A	A	A	A	T	C	A	T	T	A	T	A	T	T	T	C	T	T	A	G	T	A	A	G	G	T	T	A	A	T	A	A	G	T	T	T	T	T	A	T
C	T	C	T	A	C	C	A	A	A	T	T	C	T	A	T	C	A	A	G	G	T	A	A	A	A	A	A	G	G	A	T	C	C	G	A	A	C	C	G	T	G	G	A	A	A	A	A	A	A
A	A	A	G	T	A	G	T	A	A	G	G	A	G	T	C	A	T	T	G	G	C	T	T	T	C	T	A	G	G	T	C	A	C	G	T	T	A	A	G	G	T	G	A	T	T	A	A	C	T
A	C	A	T	G	A	G	G	C	C	T	T	A	T	G	G	A	G	G	G	C	A	G	G	G	T	G	C	G	C	G	A	A	C	G	G	G	A	A	C	T	G	G	C	G	G	C	C	A	G
C	A	C	C	T	C	A	T	T	A	C	C	C	C	T	C	C	T	T	G	T	A	T	T	T	C	T	A	G	A	T	A	C	T	C	T	T	C	C	C	C	G	C	A	T	T	A	A	A	T
T	C	T	G	C	T	G	C	C	A	G	G	T	G	C	T	T	C	C	C	A	G	C	C	C	G	C	A	C	T	C	G	T	G	A	C	C	T	T	C	G	T	A	A	C	C	A	A	C	C
T	T	T	A	G	T	G	G	A	C	A	A	T	A	G	A	T	G	G	A	C	A	G	G	G	C	G	C	A	A	G	A	T	A	T	G	G	T	T	T	A	G	T	C	G	G	C	C	T	G
C	C	C	T	A	C	G	A	T	T	T	T	C	T	A	T	C	A	A	T	C	C	A	A	A	T	A	T	T	C	A	C	C	T	A	A	A	C	C	G	T	T	A	T	A	A	T	T	T	A
T	G	T	A	T	T	G	T	G	T	A	A	T	A	T	G	T	T	T	A	C	T	T	T	T	A	T	T	A	A	T	T	T	G	C	T	T	T	T	A	A	T	C	T	T	T	T	T	C	T
G	C	G	A	A	G	C	A	C	C	A	A	G	A	A	T	G	A	A	C	T	A	A	A	A	T	A	C	C	C	A	A	G	G	A	A	A	G	G	T	A	A	A	C	A	A	C	C	T	A
T	T	T	C	A	T	A	A	G	T	C	C	T	C	A	C	T	A	A	A	C	T	A	A	A	G	A	T	A	T	A	T	T	C	C	A	A	T	T	G	C	C	C	T	A	A	T	T	G	A
G	A	G	A	C	G	T	C	T	G	A	A	G	A	C	G	G	C	C	C	T	T	C	C	C	T	C	G	C	C	C	T	G	T	T	C	C	G	G	G	A	C	T	G	C	C	G	G	T	C
G	T	G	A	A	G	A	A	G	T	A	A	G	A	A	A	G	A	A	T	T	C	A	A	A	C	A	T	T	G	A	C	G	A	C	A	A	G	G	C	A	C	C	T	A	A	T	T	G	A
C	G	C	C	A	C	C	A	A	G	C	C	C	C	A	T	C	A	A	C	G	A	A	A	A	G	A	G	C	C	A	A	C	C	G	A	A	C	C	T	C	G	G	G	A	A	G	G	G	A
C	T	C	T	C	C	A	C	G	G	T	T	C	T	C	A	C	C	C	G	A	A	C	C	C	A	C	G	G	T	C	A	C	C	C	C	C	C	C	A	T	T	C	G	C	C	G	G	C	C
C	C	C	T	T	C	C	T	C	C	T	T	C	T	T	A	C	T	T	C	G	C	T	T	T	T	T	C	C	A	T	C	C	C	T	T	T	C	C	C	T	G	T	C	T	T	C	C	C	T
T	G	T	C	T	T	T	T	T	C	C	C	T	C	T	C	T	T	T	T	T	C	T	T	T	A	T	C	T	T	T	C	T	T	A	T	T	T	T	C	C	A	A	C	T	T	C	C	C	T
G	A	G	T	C	G	C	C	T	C	T	T	G	T	C	A	G	C	C	A	G	A	C	C	C	A	C	C	A	G	C	A	G	C	T	C	C	G	G	C	T	A	T	C	C	C	C	C	T	C
A	T	A	G	T	A	G	T	A	T	G	G	A	G	T	A	A	T	T	T	C	A	T	T	T	C	T	T	T	T	T	A	A	T	G	T	T	A	A	T	G	C	G	T	T	T	T	T	G	T
T	A	T	T	G	T	C	G	A	G	T	T	T	T	G	C	T	G	G	G	A	G	G	G	G	A	G	G	G	C	G	G	T	T	T	G	G	T	T	C	T	T	T	G	G	G	G	G	A	G
G	A	G	G	T	G	T	T	C	A	G	G	G	G	T	T	G	T	T	T	T	G	T	T	T	A	T	A	T	G	T	G	G	G	C	T	T	G	G	T	G	C	C	A	T	T	A	A	T	T
G	C	G	G	G	G	A	G	G	T	G	G	G	G	G	T	G	G	G	C	T	G	G	G	G	C	G	T	C	A	G	G	G	A	G	G	G	G	G	T	G	A	G	T	G	G	T	T	G	G
C	A	C	C	G	C	T	G	G	G	C	C	C	C	G	C	C	G	G	G	A	T	G	G	G	T	G	G	G	T	G	T	C	G	A	G	G	C	C	G	C	T	A	G	G	G	G	G	G	G
T	A	T	C	C	T	G	C	A	G	C	C	T	C	C	T	T	C	C	A	A	T	C	C	C	T	C	G	A	A	C	T	T	T	T	C	C	T	T	A	C	G	T	G	C	C	G	G	C	C
A	C	A	C	C	A	T	C	G	C	C	C	A	C	C	G	A	C	C	T	A	G	C	C	C	C	C	C	T	A	C	G	A	G	A	C	C	A	A	G	C	C	A	C	C	C	C	C	T	C
C	T	C	T	C	C	C	C	G	T	T	T	C	T	C	T	C	C	C	A	G	A	C	C	C	T	C	T	A	C	C	A	C	C	A	C	C	C	C	T	T	G	A	T	C	C	T	T	A	C
C	T	C	G	T	C	G	T	G	A	G	G	C	G	T	G	C	T	T	A	A	A	T	T	T	G	T	A	A	A	T	A	C	A	C	T	T	C	C	G	G	T	C	A	T	T	A	A	C	T
C	C	C	A	G	C	A	G	G	C	A	A	C	A	G	G	C	G	G	C	C	A	G	G	G	T	G	C	C	A	G	A	C	T	A	G	G	C	C	C	A	G	A	C	G	G	C	C	C	G
T	T	T	T	A	T	T	A	C	C	T	T	T	T	A	C	T	A	A	A	C	A	A	A	A	G	A	C	A	C	A	A	T	T	A	A	A	T	T	A	T	A	A	C	A	A	C	C	C	A
C	G	C	G	T	C	A	T	A	C	G	G	C	G	T	C	C	T	T	A	T	G	T	T	T	G	T	C	A	T	T	G	C	A	C	T	T	C	C	T	G	G	C	C	T	T	C	C	T	T
T	T	T	G	G	T	A	G	T	T	G	G	T	G	G	C	T	G	G	C	T	A	G	G	G	C	G	T	C	T	G	A	T	A	T	G	G	T	T	T	G	C	T	T	G	G	T	T	C	G
T	G	T	C	G	T	C	G	A	C	C	C	T	C	G	T	T	G	G	T	C	A	G	G	G	C	G	C	T	C	G	A	T	A	T	G	G	T	T	A	C	T	T	C	G	G	C	C	T	G
G	G	G	T	C	G	A	C	C	T	T	T	G	T	C	G	G	C	C	T	T	A	C	C	C	C	C	T	T	T	C	A	G	G	C	C	C	G	G	A	T	T	C	T	C	C	T	T	T	C
A	C	A	A	T	A	A	T	A	T	A	A	A	A	T	A	A	T	T	C	A	A	T	T	T	T	T	T	C	G	T	A	A	A	T	T	T	A	A	A	A	A	T	T	T	T	T	T	G	T
G	C	G	C	A	G	C	A	C	G	C	C	G	C	A	T	G	A	A	T	G	A	A	A	A	G	A	G	T	T	A	A	G	C	G	A	A	G	G	G	C	A	G	G	A	A	G	G	A	A
T	C	T	C	C	T	T	C	T	A	C	C	T	C	C	G	T	C	C	G	C	G	C	C	C	A	C	A	G	G	C	G	T	C	T	C	C	T	T	A	C	C	T	A	C	C	A	A	G	C
G	T	G	C	C	G	T	C	C	G	C	C	G	C	C	G	G	C	C	T	A	C	C	C	C	T	C	G	T	G	C	C	G	T	G	C	C	G	G	C	C	G	G	G	C	C	G	G	T	C
C	G	C	T	C	C	C	C	G	T	T	T	C	T	C	C	C	C	C	G	C	T	C	C	C	G	C	T	G	C	C	T	C	T	G	C	C	C	C	C	T	G	G	T	C	C	T	T	G	C
A	A	A	C	T	A	T	T	C	G	C	C	A	C	T	T	A	T	T	G	G	T	T	T	T	G	T	G	G	C	T	T	A	C	C	T	T	A	A	T	C	A	C	G	T	T	G	G	C	T
T	T	T	T	C	T	G	C	T	C	T	T	T	T	C	A	T	C	C	C	T	G	C	C	C	C	C	C	C	C	C	G	T	T	C	C	C	T	T	T	T	G	C	C	C	C	C	C	A	C
T	G	T	T	T	T	T	T	A	A	T	T	T	T	T	C	T	T	T	C	G	A	T	T	T	T	T	A	C	T	T	A	T	A	C	T	T	T	T	C	T	G	C	A	T	T	A	A	T	T
A	G	A	G	T	A	G	T	T	T	G	G	A	G	T	C	A	T	T	C	C	T	T	T	T	A	T	T	C	G	T	T	A	G	T	T	T	A	A	T	G	G	T	T	T	T	T	T	T	T
A	C	A	A	G	A	G	G	G	T	A	A	A	A	G	C	A	G	G	T	T	G	G	G	G	C	G	T	T	A	G	G	A	C	G	G	G	A	A	A	A	G	G	T	G	G	T	T	A	G
A	T	A	G	A	A	C	A	T	A	G	G	A	G	A	T	A	A	A	G	G	G	A	A	A	C	A	A	G	T	A	G	A	A	A	A	A	A	A	G	G	C	A	A	A	A	A	A	A	A
G	A	G	T	G	G	C	G	C	A	T	T	G	T	G	C	G	G	G	A	G	C	G	G	G	C	G	A	A	G	G	C	G	C	T	G	G	G	G	C	T	A	T	A	G	G	A	A	A	G
A	C	A	G	T	A	C	T	G	A	G	G	A	G	T	T	A	T	T	T	T	T	T	T	T	T	T	A	T	G	T	T	A	G	G	T	T	A	A	A	G	T	G	A	T	T	A	A	G	T
C	C	C	C	G	C	T	G	A	G	C	C	C	C	G	T	C	G	G	G	A	T	G	G	G	C	G	G	G	C	G	T	C	T	G	G	G	C	C	C	C	A	G	G	G	G	G	G	A	G
C	C	C	A	C	C	G	C	T	A	A	A	C	A	C	G	C	C	C	G	A	T	C	C	C	T	C	A	G	T	C	T	C	G	C	C	C	C	C	G	A	C	C	A	C	C	A	A	C	C
T	T	T	T	A	T	A	A	A	C	T	T	T	T	A	A	T	A	A	C	A	A	A	A	A	T	A	C	C	A	A	A	T	C	T	A	A	T	T	T	T	A	T	C	A	A	C	C	C	A
T	C	T	T	T	T	T	T	A	C	T	T	T	T	T	G	T	T	T	T	G	T	T	T	T	G	T	C	T	C	T	T	T	T	A	T	T	T	T	G	T	C	A	C	T	T	C	C	T	T
C	T	C	A	T	C	G	T	C	T	A	A	C	A	T	T	C	T	T	A	C	G	T	T	T	A	T	T	A	C	T	G	C	G	C	T	T	C	C	C	A	T	C	T	T	T	T	T	T	T
T	T	T	A	A	T	G	A	A	T	A	A	T	A	A	G	T	A	A	C	T	G	A	A	A	G	A	T	C	C	A	G	T	G	C	A	A	T	T	T	A	C	C	T	A	A	T	T	C	A
A	G	A	A	A	A	C	A	A	C	A	A	A	A	A	C	A	A	A	C	T	G	A	A	A	T	A	C	C	T	A	G	A	T	C	A	A	A	A	G	A	G	C	C	A	A	C	C	T	A
G	A	G	G	A	G	T	A	C	T	G	G	G	G	A	A	G	A	A	C	C	T	A	A	A	G	A	T	C	C	A	T	G	A	T	A	A	G	G	G	G	C	T	T	A	A	T	T	A	A
C	G	C	A	G	C	A	G	T	A	A	A	C	A	G	T	C	G	G	T	A	A	G	G	G	C	G	A	T	T	G	A	C	A	C	G	G	C	C	T	A	T	C	A	G	G	A	A	G	G
A	T	A	C	A	A	C	A	T	G	C	C	A	C	A	T	A	A	A	C	T	G	A	A	A	A	A	G	C	T	A	G	A	A	T	A	A	A	A	A	C	A	T	G	A	A	G	G	C	A
C	G	C	C	C	C	C	C	C	C	C	C	C	C	C	A	C	C	C	T	G	A	C	C	C	T	C	C	T	G	C	A	C	G	T	C	C	C	C	A	C	T	T	C	C	C	C	C	A	C
G	C	G	T	C	G	C	C	T	A	T	T	G	T	C	A	G	C	C	T	C	A	C	C	C	T	C	A	T	A	C	A	G	C	G	C	C	G	G	A	T	G	G	A	C	C	A	A	C	C
T	A	T	T	T	T	T	T	G	C	T	T	T	T	T	A	T	T	T	G	A	T	T	T	T	A	T	C	G	G	T	T	T	T	A	T	T	T	T	G	T	T	A	C	T	T	C	C	G	T
G	T	G	C	T	G	C	T	T	G	C	C	G	C	T	G	G	T	T	A	C	T	T	T	T	A	T	G	A	T	T	T	G	T	G	T	T	G	G	C	C	C	G	G	T	T	G	G	T	T
C	T	C	T	C	C	T	C	G	T	T	T	C	T	C	A	C	C	C	G	T	C	C	C	C	A	C	T	G	G	C	C	C	C	T	C	C	C	C	T	T	G	T	T	C	C	T	T	G	C
T	A	T	A	T	T	T	T	G	G	A	A	T	A	T	C	T	T	T	T	T	G	T	T	T	G	T	G	T	C	T	G	T	A	G	T	T	T	T	T	A	A	G	G	T	T	G	G	C	T
G	A	G	G	A	G	G	A	C	C	G	G	G	G	A	C	G	A	A	G	T	A	A	A	A	A	A	C	G	A	A	A	G	T	C	A	A	G	G	C	G	T	C	C	A	A	C	C	T	A
G	A	G	C	G	G	A	G	C	T	C	C	G	C	G	T	G	G	G	C	G	T	G	G	G	C	G	T	C	T	G	T	G	G	A	G	G	G	G	A	C	A	A	T	G	G	T	T	G	G
T	G	T	A	C	T	G	C	C	G	A	A	T	A	C	T	T	C	C	A	T	C	C	C	C	C	C	G	A	T	C	C	T	C	T	C	C	T	T	T	A	A	T	G	C	C	G	G	G	C
A	A	A	C	A	A	T	A	T	G	C	C	A	C	A	C	A	A	A	T	C	T	A	A	A	T	A	G	T	A	A	T	A	A	T	A	A	A	A	G	C	C	T	G	A	A	G	G	T	A
A	C	A	G	C	A	G	C	G	T	G	G	A	G	C	T	A	C	C	T	C	G	C	C	C	T	C	T	T	A	C	G	A	C	A	C	C	A	A	C	G	A	A	T	C	C	T	T	A	C
A	C	A	T	G	A	C	G	A	A	T	T	A	T	G	A	A	G	G	A	G	T	G	G	G	C	G	A	A	A	G	T	A	T	A	G	G	A	A	A	T	A	A	A	G	G	A	A	A	G
G	T	G	G	T	G	A	T	T	A	G	G	G	G	T	G	G	T	T	A	A	C	T	T	T	T	T	A	A	G	T	C	G	T	A	T	T	G	G	C	G	C	A	A	T	T	A	A	A	T
C	T	C	C	G	C	T	G	G	A	C	C	C	C	G	C	C	G	G	A	A	T	G	G	G	A	G	A	A	A	G	T	C	T	G	G	G	C	C	T	C	T	G	A	G	G	A	A	G	G
T	C	T	T	C	T	T	C	G	G	T	T	T	T	C	A	T	C	C	G	C	A	C	C	C	G	C	G	G	C	C	A	T	G	A	C	C	T	T	T	T	T	A	G	C	C	G	G	C	C
T	T	T	G	T	T	A	T	C	C	G	G	T	G	T	C	T	T	T	A	A	T	T	T	T	C	T	C	A	C	T	T	T	T	C	T	T	T	T	T	G	C	C	C	T	T	C	C	T	T
C	A	C	G	G	C	A	G	T	T	G	G	C	G	G	G	C	G	G	C	A	C	G	G	G	A	G	T	C	T	G	C	C	C	C	G	G	C	C	G	G	T	C	T	G	G	T	T	T	G
A	G	A	T	G	A	A	G	A	T	T	T	A	T	G	T	A	G	G	C	C	C	G	G	G	C	G	T	C	T	G	C	A	C	T	G	G	A	A	T	T	G	T	T	G	G	T	T	C	G
T	C	T	A	T	T	G	T	C	C	A	A	T	A	T	G	T	T	T	T	T	A	T	T	T	G	T	C	T	C	T	A	T	G	T	T	T	T	T	C	A	T	T	C	T	T	C	C	A	T
G	A	G	A	A	G	A	A	C	A	A	A	G	A	A	C	G	A	A	T	G	G	A	A	A	T	A	A	T	T	A	G	G	A	C	A	A	G	G	C	A	G	C	A	A	A	A	A	T	A
C	C	C	A	A	C	C	A	C	T	A	A	C	A	A	T	C	A	A	C	G	T	A	A	A	G	A	T	C	A	A	T	C	A	T	A	A	C	C	G	A	G	T	T	A	A	T	T	G	A
A	G	A	G	A	A	C	A	T	G	G	G	A	G	A	G	A	A	A	T	A	T	A	A	A	C	A	G	T	G	A	T	A	C	A	A	A	A	A	A	G	C	A	G	A	A	G	G	C	A
C	T	C	C	G	C	T	G	C	C	C	C	C	C	G	G	C	G	G	A	C	G	G	G	G	T	G	C	A	C	G	G	C	A	G	G	G	C	C	A	C	C	G	C	G	G	C	C	A	G
T	G	T	T	C	T	T	C	T	A	T	T	T	T	C	T	T	C	C	G	T	C	C	C	C	G	C	A	G	A	C	C	T	A	C	C	C	T	T	C	T	C	C	A	C	C	A	A	C	C
T	C	T	T	T	T	C	T	T	C	T	T	T	T	T	A	T	T	T	C	T	G	T	T	T	G	T	C	C	C	T	G	T	C	A	T	T	T	T	A	T	T	A	C	T	T	C	C	T	T
T	T	T	C	T	T	T	T	G	T	C	C	T	C	T	A	T	T	T	A	T	T	T	T	T	T	T	T	A	G	T	T	T	T	C	T	T	T	T	A	C	G	C	T	T	T	T	T	T	T
G	G	G	A	C	G	A	C	A	T	A	A	G	A	C	A	G	C	C	C	A	C	C	C	C	A	C	T	C	T	C	C	G	G	G	C	C	G	G	C	A	A	G	T	C	C	T	T	T	C
T	G	T	T	A	T	G	A	G	T	T	T	T	T	A	G	T	A	A	G	T	A	A	A	A	A	A	T	G	G	A	A	T	G	T	A	A	T	T	T	T	T	T	T	A	A	T	T	G	A
C	T	C	G	T	C	C	T	T	G	G	G	C	G	T	C	C	T	T	T	T	C	T	T	T	A	T	G	T	C	T	C	C	A	G	T	T	C	C	G	G	G	G	G	T	T	G	G	T	T
C	A	C	C	G	C	A	G	G	T	C	C	C	C	G	T	C	G	G	G	G	C	G	G	G	G	G	T	G	T	G	C	C	C	C	G	G	C	C	G	C	G	C	T	G	G	T	T	C	G
G	A	G	A	C	G	C	C	C	C	A	A	G	A	C	T	G	C	C	C	A	A	C	C	C	C	C	C	C	G	C	A	G	T	T	C	C	G	G	A	A	C	T	C	C	C	C	C	C	C
A	A	A	C	A	A	G	A	A	C	C	C	A	C	A	C	A	A	A	T	C	A	A	A	A	T	A	C	T	G	A	A	A	T	G	A	A	A	A	C	C	T	G	C	A	A	C	C	G	A
A	G	A	T	C	A	T	C	T	G	T	T	A	T	C	A	A	C	C	G	A	A	C	C	C	T	C	G	G	T	C	A	A	T	G	C	C	A	A	T	T	A	G	G	C	C	G	G	A	C
C	C	C	T	T	C	G	T	T	A	T	T	C	T	T	T	C	T	T	G	C	T	T	T	T	C	T	A	G	A	T	T	C	A	T	T	T	C	C	T	T	C	T	A	T	T	A	A	A	T
A	T	A	T	T	A	C	T	A	A	T	T	A	T	T	G	A	T	T	T	T	G	T	T	T	A	T	A	T	A	T	G	A	T	A	T	T	A	A	T	T	C	A	A	T	T	A	A	C	T
A	T	A	G	T	A	T	T	A	C	G	G	A	G	T	C	A	T	T	A	A	A	T	T	T	T	T	C	A	A	T	A	A	T	A	T	T	A	A	A	G	C	A	C	T	T	C	C	A	T
C	C	C	T	G	C	G	G	A	A	T	T	C	T	G	A	C	G	G	A	A	A	G	G	G	G	G	A	A	G	G	A	C	G	A	G	G	C	C	T	T	T	A	A	G	G	A	A	A	G
T	A	T	C	T	T	G	T	G	A	C	C	T	C	T	C	T	T	T	A	G	T	T	T	T	C	T	A	A	C	T	T	T	A	G	T	T	T	T	T	C	C	G	A	T	T	A	A	C	T
G	T	G	C	C	G	T	C	A	C	C	C	G	C	C	T	G	C	C	G	A	G	C	C	C	A	C	C	G	T	C	G	G	C	C	C	C	G	G	G	C	T	C	C	C	C	C	C	T	C
G	G	G	G	C	G	A	C	C	T	G	G	G	G	C	T	G	C	C	C	G	C	C	C	C	C	C	T	C	T	C	C	G	A	T	C	C	G	G	A	G	T	T	T	C	C	T	T	G	C
A	C	A	A	G	A	A	G	C	G	A	A	A	A	G	T	A	G	G	T	G	A	G	G	G	T	G	G	T	C	G	A	A	C	T	G	G	A	A	C	A	G	T	G	G	G	G	G	G	G
C	A	C	A	A	C	A	A	T	G	A	A	C	A	A	G	C	A	A	T	G	A	A	A	A	T	A	G	T	A	A	A	C	T	C	A	A	C	C	A	A	A	C	G	A	A	G	G	A	A
T	C	T	C	A	T	G	A	T	A	C	C	T	C	A	T	T	A	A	C	G	C	A	A	A	T	A	A	C	T	A	C	T	A	A	A	A	T	T	C	C	G	A	A	A	A	A	A	C	A
T	T	T	A	C	T	C	C	C	C	A	A	T	A	C	C	T	C	C	A	T	C	C	C	C	G	C	C	A	G	C	C	T	A	T	C	C	T	T	T	A	T	T	C	C	C	C	C	T	C
T	T	T	A	A	T	T	A	T	T	A	A	T	A	A	C	T	A	A	T	G	A	A	A	A	T	A	T	T	C	A	A	T	G	G	A	A	T	T	A	A	G	G	T	A	A	T	T	T	A
A	T	A	C	A	A	T	A	A	T	C	C	A	C	A	G	A	A	A	G	T	A	A	A	A	C	A	T	G	A	A	A	A	A	C	A	A	A	A	A	C	C	C	T	A	A	T	T	T	A
T	G	T	T	C	T	C	C	G	T	T	T	T	T	C	A	T	C	C	C	A	A	C	C	C	C	C	T	C	C	C	A	T	G	A	C	C	T	T	G	T	A	A	T	C	C	T	T	A	C
T	T	T	G	T	T	A	T	C	A	G	G	T	G	T	A	T	T	T	A	T	T	T	T	T	G	T	A	A	T	T	T	T	G	C	T	T	T	T	A	G	T	C	A	T	T	A	A	T	T
G	C	G	G	G	G	T	G	A	T	G	G	G	G	G	C	G	G	G	C	A	G	G	G	G	A	G	T	C	T	G	G	G	G	T	G	G	G	G	G	G	T	T	T	G	G	T	T	T	G
A	C	A	A	G	A	G	G	C	T	A	A	A	A	G	A	A	G	G	T	C	T	G	G	G	A	G	T	T	T	G	T	A	G	T	G	G	A	A	G	A	A	T	T	G	G	T	T	G	G
C	G	C	C	A	C	C	A	G	G	C	C	C	C	A	A	C	A	A	T	T	G	A	A	A	C	A	G	T	G	A	G	C	T	T	A	A	C	C	G	C	A	T	G	A	A	G	G	A	A
A	A	A	T	C	A	A	C	T	A	T	T	A	T	C	C	A	C	C	T	G	C	C	C	C	A	C	A	T	T	C	C	A	G	G	C	C	A	A	G	T	A	G	A	C	C	A	A	C	C
C	A	C	T	T	C	C	T	G	C	T	T	C	T	T	T	C	T	T	G	C	C	T	T	T	A	T	C	G	C	T	C	C	T	T	T	T	C	C	T	T	G	T	C	T	T	C	C	A	T
T	C	T	T	T	T	T	T	C	A	T	T	T	T	T	G	T	T	T	T	T	T	T	T	T	C	T	A	T	C	T	T	T	A	C	T	T	T	T	G	T	A	C	A	T	T	A	A	C	T
A	A	A	A	T	A	T	T	T	C	A	A	A	A	T	G	A	T	T	C	G	T	T	T	T	T	T	C	C	G	T	T	A	T	C	T	T	A	A	T	A	C	C	C	T	T	C	C	T	T
A	A	A	T	A	A	T	A	G	T	T	T	A	T	A	A	A	A	A	C	C	T	A	A	A	G	A	T	C	A	A	T	A	A	G	A	A	A	A	A	T	C	G	T	A	A	T	T	A	A
G	C	G	T	T	G	G	T	G	A	T	T	G	T	T	C	G	T	T	G	C	C	T	T	T	G	T	A	G	A	T	C	G	C	A	T	T	G	G	T	T	T	A	A	T	T	A	A	A	T
A	T	A	G	T	A	T	T	T	A	G	G	A	G	T	T	A	T	T	A	G	A	T	T	T	A	T	A	A	C	T	A	A	T	A	T	T	A	A	A	G	T	A	A	T	T	A	A	G	T
G	G	G	A	G	G	C	G	A	G	A	A	G	A	G	T	G	G	G	A	T	A	G	G	G	C	G	G	A	A	G	A	G	G	C	G	G	G	G	C	A	C	C	G	G	G	G	G	A	G
G	G	G	C	A	G	C	A	A	A	C	C	G	C	A	T	G	A	A	C	G	C	A	A	A	T	A	A	C	A	A	C	G	C	A	A	A	G	G	T	C	T	A	A	A	A	A	A	G	A
G	A	G	A	C	G	G	C	A	G	A	A	G	A	C	A	G	C	C	A	A	T	C	C	C	T	C	G	A	C	C	T	G	T	A	C	C	G	G	G	A	A	A	G	C	C	G	G	G	C
G	C	G	C	A	G	A	A	G	G	C	C	G	C	A	T	G	A	A	A	A	C	A	A	A	T	A	G	A	T	A	C	G	G	C	A	A	G	G	C	C	G	C	G	A	A	G	G	G	A
T	T	T	T	C	T	A	C	C	G	T	T	T	T	C	T	T	C	C	C	C	T	C	C	C	A	C	G	C	G	C	T	T	C	T	C	C	T	T	T	T	C	T	G	C	C	G	G	G	C
G	T	G	A	T	G	C	T	T	G	A	A	G	A	T	G	G	T	T	T	A	C	T	T	T	T	T	G	T	G	T	C	G	C	G	T	T	G	G	G	A	A	G	G	T	T	G	G	T	T
T	T	T	A	A	T	A	A	T	T	A	A	T	A	A	A	T	A	A	G	T	A	A	A	A	T	A	T	G	A	A	A	T	G	G	A	A	T	T	C	A	C	G	T	A	A	T	T	G	A
A	A	A	G	A	A	A	A	C	G	G	G	A	G	A	C	A	A	A	G	G	T	A	A	A	G	A	G	G	C	A	T	A	T	A	A	A	A	A	C	G	G	A	G	A	A	G	G	T	A
T	T	T	A	G	T	C	G	A	T	A	A	T	A	G	A	T	G	G	A	A	G	G	G	G	A	G	T	A	T	G	G	T	G	C	G	G	T	T	G	A	T	C	T	G	G	T	T	A	G
A	T	A	G	A	A	T	A	T	A	G	G	A	G	A	C	A	A	A	C	G	A	A	A	A	C	A	A	C	T	A	A	A	A	T	A	A	A	A	T	G	G	T	A	A	A	A	A	T	A
C	G	C	G	G	C	G	G	G	T	G	G	C	G	G	T	C	G	G	T	C	A	G	G	G	A	G	T	T	T	G	A	C	A	T	G	G	C	C	G	G	C	T	T	G	G	T	T	A	G
T	A	T	G	G	T	G	G	C	A	G	G	T	G	G	A	T	G	G	T	A	G	G	G	G	C	G	A	T	A	G	G	T	C	T	G	G	T	T	A	G	T	T	A	G	G	A	A	C	G
G	C	G	G	G	G	A	G	A	C	G	G	G	G	G	A	G	G	G	T	T	T	G	G	G	T	G	C	T	T	G	T	G	A	A	G	G	G	G	A	G	G	A	C	G	G	C	C	T	G
C	A	C	T	G	C	C	G	C	T	T	T	C	T	G	G	C	G	G	A	G	G	G	G	G	A	G	T	A	T	G	G	C	T	T	G	G	C	C	C	T	G	T	T	G	G	T	T	G	G
T	C	T	G	T	T	T	T	T	G	G	G	T	G	T	A	T	T	T	T	A	T	T	T	T	A	T	G	T	G	T	T	T	G	T	T	T	T	T	A	G	T	T	G	T	T	G	G	C	T
G	T	G	T	G	G	T	G	T	C	T	T	G	T	G	G	G	G	G	T	A	G	G	G	G	G	G	C	T	A	G	G	G	A	G	G	G	G	G	T	T	A	G	C	G	G	C	C	T	G
C	A	C	A	T	C	T	T	T	T	A	A	C	A	T	G	C	T	T	G	A	A	T	T	T	A	T	T	G	C	T	A	C	G	A	T	T	C	C	G	A	A	A	T	T	T	T	T	G	T
C	A	C	T	A	C	A	A	G	G	T	T	C	T	A	G	C	A	A	A	T	T	A	A	A	G	A	G	A	A	A	T	C	C	C	A	A	C	C	A	T	A	C	G	A	A	G	G	C	A
G	G	G	A	T	G	T	T	T	C	A	A	G	A	T	G	G	T	T	C	T	C	T	T	T	G	T	C	C	C	T	C	G	A	A	T	T	G	G	G	A	G	A	C	T	T	C	C	C	T
T	A	T	C	A	T	T	A	C	C	C	C	T	C	A	T	T	A	A	A	G	A	A	A	A	G	A	C	A	T	A	A	T	T	C	A	A	T	T	C	C	C	C	C	A	A	C	C	G	A
G	G	G	T	C	G	G	C	C	G	T	T	G	T	C	G	G	C	C	C	C	T	C	C	C	G	C	G	C	A	C	T	G	G	T	C	C	G	G	A	T	T	T	G	C	C	G	G	T	C
A	G	A	G	T	A	A	T	G	T	G	G	A	G	T	T	A	T	T	T	T	T	T	T	T	T	T	T	T	A	T	T	A	A	A	T	T	A	A	T	G	T	A	T	T	T	T	T	G	T
A	G	A	C	G	A	C	G	A	G	C	C	A	C	G	A	A	G	G	A	T	G	G	G	G	G	G	G	A	G	G	G	A	A	A	G	G	A	A	G	C	C	A	G	G	G	G	G	A	G
C	G	C	T	C	C	A	C	A	A	T	T	C	T	C	T	C	C	C	A	G	T	C	C	C	T	C	A	A	A	C	T	C	A	G	C	C	C	C	A	T	A	G	A	C	C	A	A	A	C
A	T	A	G	T	A	C	T	C	A	G	G	A	G	T	A	A	T	T	G	G	G	T	T	T	A	T	A	G	G	T	G	A	T	A	T	T	A	A	A	G	T	A	A	T	T	A	A	C	T
T	G	T	C	G	T	T	G	A	C	C	C	T	C	G	C	T	G	G	A	T	G	G	G	G	T	G	C	A	G	G	G	T	T	G	G	G	T	T	A	C	G	G	C	G	G	C	C	A	G
G	T	G	C	C	G	A	C	A	A	C	C	G	C	C	T	G	C	C	G	A	T	C	C	C	A	C	A	G	G	C	T	G	G	G	C	C	G	G	T	C	C	G	A	C	C	A	A	T	C
A	A	A	G	C	A	A	C	C	T	G	G	A	G	C	G	A	C	C	G	C	G	C	C	C	C	C	T	G	G	C	G	A	C	G	C	C	A	A	T	G	A	G	T	C	C	T	T	G	C
G	T	G	T	G	G	G	G	T	G	T	T	G	T	G	C	G	G	G	G	A	A	G	G	G	T	G	G	G	T	G	A	G	T	G	G	G	G	G	G	T	C	G	G	G	G	G	G	A	G
C	A	C	G	T	C	A	T	G	A	G	G	C	G	T	T	C	T	T	G	C	A	T	T	T	G	T	A	G	G	T	A	C	T	T	T	T	C	C	C	G	T	T	A	T	T	A	A	G	T
A	C	A	A	G	A	G	G	G	G	A	A	A	A	G	G	A	G	G	T	G	A	G	G	G	C	G	G	T	T	G	A	A	G	G	G	G	A	A	T	A	T	G	G	G	G	G	G	C	G
T	T	T	A	A	T	G	A	A	C	A	A	T	A	A	C	T	A	A	G	G	C	A	A	A	T	A	C	G	A	A	C	T	G	T	A	A	T	T	T	A	T	T	C	A	A	C	C	A	A
G	G	G	C	A	G	G	A	C	A	C	C	G	C	A	C	G	A	A	T	A	T	A	A	A	G	A	A	T	T	A	T	G	T	A	A	A	G	G	G	C	G	A	A	A	A	A	A	T	A
A	C	A	A	C	A	G	C	T	T	A	A	A	A	C	G	A	C	C	A	A	T	C	C	C	C	C	T	A	A	C	T	A	A	T	C	C	A	A	G	A	T	T	T	C	C	T	T	G	C
A	T	A	T	A	A	T	A	T	G	T	T	A	T	A	T	A	A	A	T	C	C	A	A	A	C	A	G	T	C	A	C	A	C	A	A	A	A	A	T	T	C	A	G	A	A	G	G	A	A
A	G	A	G	T	A	G	T	T	A	G	G	A	G	T	G	A	T	T	A	G	A	T	T	T	G	T	A	A	T	T	A	A	A	C	T	T	A	A	A	G	C	C	A	T	T	A	A	A	T
T	C	T	A	G	T	T	G	A	A	A	A	T	A	G	A	T	G	G	C	T	T	G	G	G	T	G	A	C	G	G	T	T	C	T	G	G	T	T	C	A	G	T	A	G	G	A	A	A	G
T	C	T	G	A	T	A	A	T	A	G	G	T	G	A	A	T	A	A	T	T	G	A	A	A	G	A	A	T	C	A	G	T	G	G	A	A	T	T	A	G	A	G	A	A	A	A	A	T	A
G	G	G	C	G	G	T	G	T	T	C	C	G	C	G	C	G	G	G	G	C	G	G	G	G	A	G	T	G	T	G	G	G	G	C	G	G	G	G	C	C	A	C	T	G	G	T	T	T	G
C	T	C	A	C	C	A	C	G	T	A	A	C	A	C	A	C	C	C	C	T	C	C	C	C	A	C	T	C	G	C	C	C	A	T	C	C	C	C	G	A	C	T	T	C	C	T	T	G	C
T	G	T	T	A	T	C	A	A	G	T	T	T	T	A	T	T	A	A	T	G	A	A	A	A	C	A	G	T	C	A	A	T	A	G	A	A	T	T	G	T	A	G	G	A	A	G	G	C	A
T	A	T	G	T	T	T	T	C	C	G	G	T	G	T	G	T	T	T	G	A	G	T	T	T	A	T	C	G	C	T	G	T	C	C	T	T	T	T	A	G	A	C	C	T	T	C	C	T	T
G	A	G	A	G	G	G	G	A	T	A	A	G	A	G	A	G	G	G	C	A	A	G	G	G	T	G	T	C	G	G	A	G	G	C	G	G	G	G	A	A	C	C	T	G	G	T	T	T	G
G	C	G	A	A	G	C	A	C	T	A	A	G	A	A	G	G	A	A	C	A	C	A	A	A	G	A	T	C	T	A	C	G	T	G	A	A	G	G	C	A	T	G	T	A	A	T	T	G	A
T	A	T	A	A	T	T	A	T	G	A	A	T	A	A	C	T	A	A	G	A	G	A	A	A	A	A	G	G	G	A	G	T	T	T	A	A	T	T	G	A	G	T	G	A	A	G	G	G	A
A	T	A	T	A	A	G	A	A	G	T	T	A	T	A	A	A	A	A	T	G	G	A	A	A	G	A	G	T	A	A	G	A	C	G	A	A	A	A	T	T	G	G	G	A	A	G	G	T	A
C	G	C	T	T	C	C	T	A	T	T	T	C	T	T	T	C	T	T	G	A	G	T	T	T	C	T	T	G	A	T	G	C	T	A	T	T	C	C	T	T	A	A	T	T	T	T	T	A	T
A	A	A	G	T	A	C	T	G	A	G	G	A	G	T	G	A	T	T	A	G	C	T	T	T	A	T	A	A	C	T	C	A	G	A	T	T	A	A	C	G	C	A	A	T	T	A	A	C	T
C	G	C	C	G	C	G	G	A	C	C	C	C	C	G	A	C	G	G	A	C	G	G	G	G	T	G	C	A	A	G	G	C	A	C	G	G	C	C	T	C	T	C	C	G	G	C	C	A	G
G	C	G	T	C	G	T	C	G	A	T	T	G	T	C	A	G	C	C	C	T	A	C	C	C	G	C	A	C	T	C	A	G	A	A	C	C	G	G	G	T	T	A	A	C	C	A	A	C	C
G	A	G	T	T	G	G	T	G	C	T	T	G	T	T	A	G	T	T	A	A	T	T	T	T	A	T	C	A	G	T	T	G	A	T	T	T	G	G	A	T	T	T	C	T	T	C	C	G	T
A	T	A	G	T	A	A	T	G	G	G	G	A	G	T	T	A	T	T	T	T	T	T	T	T	A	T	G	T	A	T	T	A	A	G	T	T	A	A	A	G	A	G	G	T	T	G	G	G	T
A	G	A	G	G	A	A	G	G	G	G	G	A	G	G	T	A	G	G	G	G	T	G	G	G	A	G	G	G	G	G	T	A	G	A	G	G	A	A	A	G	T	A	G	G	G	G	G	A	G
C	A	C	T	G	C	C	G	T	A	T	T	C	T	G	G	C	G	G	A	A	T	G	G	G	T	G	A	A	C	G	T	C	A	G	G	G	C	C	A	T	T	G	A	G	G	A	A	A	G
G	A	G	A	T	G	A	T	G	A	A	A	G	A	T	C	G	T	T	G	A	G	T	T	T	T	T	A	G	A	T	G	G	G	C	T	T	G	G	G	A	G	C	A	T	T	A	A	C	T
T	A	T	C	A	T	T	A	T	C	C	C	T	C	A	T	T	A	A	C	T	T	A	A	A	G	A	C	C	T	A	T	T	C	A	A	A	T	T	A	C	A	A	C	A	A	C	C	G	A
T	T	T	A	C	T	G	C	A	G	A	A	T	A	C	T	T	C	C	A	T	T	C	C	C	C	C	G	A	G	C	T	T	T	T	C	C	T	T	G	A	C	T	G	C	C	G	G	T	C
C	T	C	C	A	C	A	A	T	T	C	C	C	C	A	G	C	A	A	T	G	A	A	A	A	T	A	T	T	A	A	A	C	A	G	A	A	C	C	C	C	A	G	T	A	A	T	T	T	A
T	G	T	G	C	T	G	C	A	T	G	G	T	G	C	G	T	C	C	G	C	A	C	C	C	T	C	T	G	A	C	A	T	T	A	C	C	T	T	T	G	C	A	T	C	C	T	T	C	C
G	C	G	G	G	G	C	G	C	C	G	G	G	G	G	T	G	G	G	A	A	A	G	G	G	G	G	C	A	A	G	A	G	G	A	G	G	G	G	A	G	T	A	C	G	G	C	C	T	G
A	T	A	A	G	A	A	G	T	T	A	A	A	A	G	A	A	G	G	A	G	G	G	G	G	G	G	T	A	T	G	G	A	A	A	G	G	A	A	T	A	A	A	T	G	G	T	T	G	G
A	T	A	A	A	A	T	A	G	G	A	A	A	A	A	C	A	A	A	A	A	C	A	A	A	T	A	G	A	T	A	C	A	A	T	A	A	A	A	G	A	A	T	G	A	A	G	G	A	A
A	G	A	C	A	A	G	A	C	A	C	C	A	C	A	A	A	A	A	T	C	C	A	A	A	A	A	A	T	G	A	C	A	T	T	A	A	A	A	A	C	G	T	A	A	A	A	A	A	A
A	G	A	G	C	A	A	C	T	A	G	G	A	G	C	C	A	C	C	T	A	A	C	C	C	C	C	A	T	C	C	A	A	T	G	C	C	A	A	A	G	A	G	A	C	C	A	A	A	C
G	T	G	T	G	G	A	G	G	A	T	T	G	T	G	G	G	G	G	G	C	C	G	G	G	A	G	A	G	T	G	C	G	G	C	G	G	G	G	T	T	G	C	A	G	G	A	A	A	G
A	A	A	T	T	A	A	T	C	A	T	T	A	T	T	G	A	T	T	C	C	T	T	T	T	C	T	A	C	T	T	T	A	C	T	T	T	A	A	T	T	G	T	A	T	T	A	A	G	T
G	C	G	C	T	G	T	T	C	G	C	C	G	C	T	A	G	T	T	T	T	T	T	T	T	G	T	G	T	G	T	T	G	A	T	T	T	G	G	G	C	G	T	G	T	T	G	G	A	T
C	A	C	T	C	C	T	C	G	A	T	T	C	T	C	A	C	C	C	T	T	G	C	C	C	G	C	A	T	G	C	G	C	G	G	C	C	C	C	C	T	G	G	A	C	C	A	A	G	C
T	C	T	G	T	T	G	T	T	G	G	G	T	G	T	C	T	T	T	G	T	C	T	T	T	A	T	G	G	T	T	C	T	A	G	T	T	T	T	A	G	T	G	G	T	T	G	G	C	T
A	G	A	A	G	A	C	G	G	C	A	A	A	A	N	G	A	G	G	G	T	G	G	G	G	A	G	C	G	A	G	G	A	C	T	N	G	A	A	G	A	G	T	C	G	G	C	C	T	G
T	G	T	A	A	T	T	A	A	T	A	A	T	A	A	T	T	A	A	T	G	A	A	A	A	C	A	T	T	C	A	A	T	A	A	A	A	T	T	A	A	T	A	T	A	A	T	T	A	A
G	A	G	A	A	G	T	A	A	A	A	A	G	A	A	T	G	A	A	A	A	A	A	A	A	G	A	A	A	A	A	A	G	C	C	A	A	G	G	C	A	A	C	A	A	A	A	A	T	A
A	A	A	A	A	A	G	A	C	T	A	A	A	A	A	C	A	A	A	C	A	T	A	A	A	T	A	T	C	C	A	T	A	C	A	A	A	A	A	A	A	T	A	T	A	A	T	T	G	A
A	C	A	G	A	A	G	A	A	G	G	G	A	G	A	T	A	A	A	A	A	T	N	A	A	T	A	G	A	G	A	T	A	T	C	A	A	A	A	C	G	A	C	G	A	A	G	G	A	A
T	G	T	A	G	T	T	G	T	A	A	A	T	A	G	G	T	G	G	C	T	T	N	G	G	C	G	A	C	G	G	T	T	T	G	G	G	T	T	C	A	C	G	A	G	G	A	A	A	G
T	T	T	G	A	T	A	A	G	A	G	G	T	G	A	A	T	A	A	G	T	T	N	A	A	T	A	A	G	A	A	T	T	T	G	A	A	T	T	T	G	T	G	A	A	A	A	A	T	A
G	T	G	C	G	G	C	G	A	T	C	C	G	C	G	A	G	G	G	G	A	G	N	G	G	G	G	T	G	A	G	G	G	T	A	G	G	G	G	T	C	G	A	T	G	G	T	T	T	G
C	C	C	T	C	C	A	C	G	T	T	T	C	T	C	A	C	C	C	A	A	T	N	C	C	A	C	T	A	C	C	T	C	G	A	C	C	C	C	T	T	C	A	T	C	C	T	T	G	C
A	T	A	A	T	A	C	T	C	G	A	A	A	A	T	A	A	T	T	A	A	G	N	T	T	A	T	G	A	G	T	G	A	A	C	T	T	A	A	T	A	T	C	G	T	T	G	G	C	T
G	G	G	T	A	G	G	A	A	C	T	T	G	T	A	G	G	A	A	C	T	G	N	A	A	A	A	C	C	T	A	G	G	A	G	A	A	G	G	G	T	G	G	C	A	A	C	C	A	A
A	A	A	G	T	A	G	T	T	A	G	G	A	G	T	A	A	T	T	G	T	C	N	T	T	A	T	A	G	T	T	C	A	A	T	T	T	A	A	A	G	C	T	A	T	T	A	A	G	T
C	A	C	A	G	C	A	G	G	G	A	A	C	A	G	G	C	G	G	T	G	A	N	G	G	G	G	G	T	C	G	A	C	T	T	G	G	C	C	A	A	C	T	G	G	G	G	G	A	G
A	A	A	A	A	A	A	A	A	A	A	A	A	A	A	C	A	A	A	T	G	C	N	A	A	A	A	A	T	T	A	C	A	T	C	A	A	A	A	A	A	G	C	A	A	A	A	A	C	A
C	A	C	T	A	C	C	A	A	C	T	T	C	T	A	T	C	A	A	C	C	T	N	A	A	G	A	C	C	G	A	T	C	A	T	A	A	C	C	T	T	T	T	C	A	A	C	C	A	A
C	G	C	T	T	C	G	T	A	A	T	T	C	T	T	A	C	T	T	T	A	G	N	T	T	C	T	A	T	A	T	G	C	A	G	T	T	C	C	T	T	G	G	A	T	T	A	A	C	T
T	A	T	G	T	T	T	T	T	C	G	G	T	G	T	T	T	T	T	G	A	A	N	T	T	T	T	C	G	A	T	A	T	A	A	T	T	T	T	A	G	A	A	C	T	T	C	C	C	T
T	G	T	C	G	T	T	G	T	C	C	C	T	C	G	G	T	G	G	A	A	G	N	G	G	A	G	C	A	A	G	G	T	T	A	G	G	T	T	A	C	A	A	C	G	G	C	C	T	G
T	C	T	A	C	T	C	C	G	T	A	A	T	A	C	A	T	C	C	A	G	A	N	C	C	T	C	T	A	A	C	A	T	T	A	C	C	T	T	A	A	C	A	T	C	C	T	T	T	C
T	T	T	G	A	T	T	A	C	T	G	G	T	G	A	A	T	A	A	A	A	A	N	A	A	G	A	T	A	G	A	A	T	G	A	A	A	T	T	T	G	A	A	T	A	A	T	T	T	A
G	A	G	A	G	G	G	G	T	T	A	A	G	A	G	T	G	G	G	A	A	T	N	G	G	A	G	T	A	A	G	T	G	G	G	G	G	G	G	T	A	T	G	T	G	G	T	T	T	G
A	T	A	C	A	A	A	A	T	T	C	C	A	C	A	T	A	A	A	G	A	T	N	A	A	A	A	T	G	G	A	T	A	C	A	A	A	A	A	G	C	G	A	T	A	A	T	T	G	A
A	G	A	A	C	A	A	C	G	G	A	A	A	A	C	G	A	C	C	A	T	T	N	C	C	T	C	G	A	C	C	T	A	A	G	C	C	A	A	G	A	A	G	G	C	C	G	G	A	C
A	A	A	C	A	A	A	A	G	A	C	C	A	C	A	C	A	A	A	G	T	G	N	A	A	T	A	A	G	T	A	G	A	A	C	A	A	A	A	C	C	G	C	A	A	A	A	A	A	A
T	A	T	C	C	T	A	C	T	A	C	C	T	C	C	A	T	C	C	C	T	A	N	C	C	G	C	A	C	A	C	A	T	A	T	C	C	T	T	A	C	C	T	A	C	C	A	A	A	C
T	T	T	T	C	T	G	C	A	A	T	T	T	T	C	G	T	C	C	T	G	C	N	C	C	C	C	A	T	T	C	C	T	G	A	C	C	T	T	A	T	A	A	A	C	C	A	A	T	C
A	T	A	T	T	A	A	T	C	T	T	T	A	T	T	A	A	T	T	A	A	T	N	T	T	A	T	T	A	G	T	T	A	A	T	T	T	A	A	A	T	T	T	T	T	T	T	T	T	T
A	G	A	T	T	A	G	T	A	T	T	T	A	T	T	N	A	T	T	T	C	A	N	T	T	G	T	T	T	A	T	A	A	A	G	T	T	A	A	G	T	G	G	T	T	T	T	T	A	T
A	C	A	T	T	A	C	T	C	A	T	T	A	T	T	N	A	T	T	G	A	A	N	T	T	A	T	A	G	A	T	A	A	A	A	T	T	A	A	A	T	A	A	A	T	T	A	A	A	T
T	A	T	G	T	T	T	T	G	A	G	G	T	G	T	C	T	T	T	A	T	A	N	T	T	C	T	A	A	T	T	A	T	T	A	T	T	T	T	A	G	A	A	A	T	T	A	A	A	T
T	G	T	A	G	T	A	G	G	A	A	A	T	A	G	C	T	G	G	A	C	G	N	G	G	A	G	A	A	T	G	G	T	T	T	G	G	T	T	A	A	A	T	A	G	G	A	A	T	G
G	A	G	A	A	G	T	A	A	T	A	A	G	A	A	T	G	A	A	T	T	A	N	A	A	C	A	T	T	G	A	A	G	T	T	A	A	G	G	T	A	T	T	T	A	A	T	T	T	A
G	C	G	A	A	G	G	A	A	T	A	A	G	A	A	T	G	A	A	T	T	A	N	A	A	C	A	T	T	C	A	A	G	G	G	A	A	G	G	T	A	T	G	T	A	A	T	T	G	A
C	A	C	T	A	C	A	A	C	G	T	T	C	T	A	T	C	A	A	G	C	G	N	A	A	T	A	G	G	A	A	G	C	A	C	A	A	C	C	T	T	G	C	G	A	A	G	G	G	A
A	C	A	T	T	A	A	T	G	G	T	T	A	T	T	T	A	T	T	C	A	G	N	T	T	T	T	G	C	G	T	G	A	C	A	T	T	A	A	G	T	C	A	G	T	T	G	G	C	T
A	C	A	A	T	A	T	T	T	C	A	A	A	A	T	G	A	T	T	A	A	T	N	T	T	T	T	C	A	A	T	T	A	A	G	T	T	A	A	A	A	T	G	C	T	T	C	C	A	T
A	T	A	A	A	A	T	A	T	A	A	A	A	A	A	A	A	A	A	G	T	G	N	A	A	T	A	A	G	C	A	G	A	T	A	A	A	A	A	C	A	T	A	A	A	A	A	A	A	A
G	T	G	A	A	G	G	A	C	A	A	A	G	A	A	A	G	A	A	A	G	C	N	A	A	G	A	A	A	A	A	C	G	C	C	A	A	G	G	A	A	G	C	A	A	A	A	A	A	A
A	T	A	T	A	A	C	A	T	A	T	T	A	T	A	A	A	A	A	C	G	C	N	A	A	A	A	A	C	C	A	C	A	T	A	A	A	A	A	C	T	G	A	A	A	A	A	A	G	A
A	T	A	T	T	A	A	T	G	G	T	T	A	T	T	T	A	T	T	A	G	A	N	T	T	A	T	G	A	C	T	A	A	T	C	T	T	A	A	C	T	T	C	G	T	T	G	G	A	T
A	G	A	G	T	A	G	T	A	A	G	G	A	G	T	T	A	T	T	C	G	C	N	T	T	A	T	A	C	T	T	C	A	C	C	T	T	A	A	T	G	A	C	A	T	T	A	A	A	T
T	A	T	G	G	T	A	G	A	A	G	G	T	G	G	A	T	G	G	C	A	T	N	G	G	T	G	A	C	T	G	T	T	A	T	G	G	T	T	T	G	C	T	A	G	G	A	A	A	G
T	A	T	C	G	T	C	G	A	A	C	C	T	C	G	A	T	G	G	T	A	A	N	G	G	T	G	A	T	T	G	A	T	A	T	G	G	T	T	C	C	A	T	A	G	G	A	A	T	G
T	A	T	A	C	T	A	C	A	T	A	A	T	A	C	A	T	C	C	T	T	C	N	C	C	A	C	T	T	T	C	C	T	T	T	C	C	T	T	A	A	C	T	T	C	C	T	T	T	C
G	T	G	A	A	G	C	A	G	T	A	A	G	A	A	T	G	A	A	T	G	T	N	A	A	A	A	T	T	G	A	T	G	G	T	A	A	G	G	A	A	G	T	T	A	A	T	T	T	A
A	T	A	A	A	A	C	A	A	T	A	A	A	A	A	T	A	A	A	T	T	T	N	A	A	A	A	T	T	A	A	T	A	G	G	A	A	A	A	T	A	G	G	T	A	A	T	T	G	A
C	A	C	G	A	C	T	A	G	G	G	G	C	G	A	G	C	A	A	G	C	G	N	A	A	T	A	G	G	A	A	G	C	G	A	A	A	C	C	G	G	A	A	G	A	A	G	G	A	A
A	A	A	A	G	A	T	G	C	A	A	A	A	A	G	G	A	G	G	A	C	T	N	G	G	T	G	A	A	A	G	T	A	G	A	G	G	A	A	G	A	A	A	A	G	G	A	A	C	G
C	A	T	A	A	T	T	A	T	C	A	A	T	A	A	C	C	A	A	A	A	G	N	A	A	G	A	C	A	T	A	G	C	A	A	A	A	T	C	G	A	C	A	C	A	A	C	C	A	A
C	T	C	A	A	C	T	A	A	A	A	A	C	A	A	A	C	A	A	A	A	G	N	A	A	G	A	A	A	T	A	G	C	A	T	A	A	C	C	G	A	G	T	A	A	A	A	A	C	A
T	T	T	T	A	T	G	A	T	C	T	T	T	T	A	A	T	A	A	T	A	T	N	A	A	C	A	C	T	A	A	T	T	T	T	A	A	T	T	A	T	T	T	C	A	A	C	C	C	A
T	G	T	T	T	T	A	T	G	C	T	T	T	T	T	A	T	T	T	T	T	T	N	T	T	A	T	C	T	A	T	T	T	G	A	T	T	T	T	A	T	T	A	C	T	T	C	C	T	T
C	G	C	T	T	C	A	T	A	T	T	T	C	T	T	G	C	T	T	A	T	A	N	T	T	A	T	T	A	A	T	A	C	T	A	T	T	C	C	T	T	C	A	T	T	T	T	T	T	T
A	C	A	G	T	A	A	T	A	T	G	G	A	G	T	A	A	T	T	A	T	C	N	T	T	A	T	T	A	T	T	C	A	C	A	T	T	A	A	G	G	T	A	T	T	T	T	T	C	T
A	A	A	A	G	A	T	G	T	C	A	A	A	A	G	A	A	G	G	A	T	T	N	G	G	G	G	C	A	T	G	T	A	C	T	G	G	A	A	T	A	G	T	C	G	G	C	C	A	G
T	A	T	C	A	T	T	A	T	A	C	C	T	C	A	A	T	A	A	T	G	T	N	A	A	A	A	A	T	G	A	T	T	A	T	A	A	T	T	C	C	A	T	A	A	A	A	A	A	A
G	A	G	A	C	G	A	C	G	A	A	A	G	A	C	T	G	C	C	T	T	A	N	C	C	A	C	A	T	G	C	A	G	A	G	C	C	G	G	C	A	A	G	A	C	C	A	A	T	C
G	G	G	C	A	G	A	A	C	T	C	C	G	C	A	T	G	A	A	G	A	C	N	A	A	A	A	T	G	C	A	C	G	A	G	A	A	G	G	A	T	A	G	T	A	A	T	T	G	A
G	A	G	C	C	G	A	C	A	G	C	C	G	C	C	T	G	C	C	G	T	C	N	C	C	T	C	G	G	A	C	C	G	T	C	C	C	G	G	A	C	A	C	G	C	T	G	G	G	C
G	A	G	T	C	G	T	C	G	G	T	T	G	T	C	G	G	C	C	C	T	C	N	C	C	T	C	G	C	A	C	C	G	T	A	C	C	G	G	A	T	G	A	G	C	C	G	G	G	C
A	A	A	T	T	A	T	T	A	G	T	T	A	T	T	A	A	T	T	A	T	C	N	T	T	T	T	G	A	A	T	N	A	T	A	T	T	A	A	T	T	A	A	G	T	T	G	G	G	T
A	T	A	C	T	A	G	T	C	G	C	C	A	C	T	C	A	T	T	A	C	A	N	T	T	G	T	G	A	G	T	A	A	T	A	T	T	A	A	T	C	G	A	G	T	T	G	G	A	T
T	T	T	A	C	T	G	C	A	A	A	A	T	A	C	A	T	C	C	A	C	A	N	C	C	A	C	A	A	A	C	A	T	G	G	C	C	T	T	T	A	C	G	A	C	C	A	A	A	C
G	T	G	A	A	G	C	A	C	A	A	A	G	A	A	T	G	A	A	G	C	A	N	A	A	C	A	A	G	A	A	A	G	T	A	A	A	G	G	T	A	T	A	A	A	A	A	A	T	A
T	G	T	T	A	T	A	A	C	T	T	T	T	T	A	C	T	A	A	A	T	A	N	A	A	A	A	T	A	A	A	A	T	A	A	A	A	T	T	G	T	A	A	T	A	A	T	T	G	A
C	A	C	G	T	C	A	T	T	G	G	G	C	G	T	T	C	T	T	A	T	T	N	T	T	C	T	G	A	T	T	T	C	T	A	T	T	C	C	T	G	T	A	G	T	T	G	G	T	T
C	C	C	G	G	C	A	G	T	T	G	G	C	G	G	T	C	G	G	A	A	G	N	G	G	C	G	T	A	T	G	G	C	T	T	G	G	C	C	A	G	G	T	T	G	G	T	T	C	G
A	A	A	G	G	A	G	G	T	C	G	G	A	G	G	C	A	G	G	T	A	C	N	G	G	T	G	C	T	T	G	C	A	T	T	G	G	A	A	T	G	A	T	C	G	G	C	C	C	G
A	C	A	G	G	A	A	G	T	C	G	G	A	G	G	A	A	G	G	T	A	T	N	G	G	T	G	C	T	G	G	T	A	C	T	G	G	A	A	T	G	A	T	C	G	G	C	C	A	G
A	C	A	A	G	A	A	G	G	A	A	A	A	A	G	A	A	G	G	T	T	G	N	G	G	C	G	A	T	A	G	G	A	C	G	G	G	A	A	T	A	T	G	A	G	G	A	A	A	G
T	T	T	A	A	T	A	A	A	A	A	A	T	A	A	T	T	A	A	G	T	T	N	A	A	A	A	A	G	C	A	T	T	C	A	A	A	T	T	C	A	T	A	A	A	A	A	A	A	A
T	T	T	T	A	T	T	A	A	A	T	T	T	T	A	G	T	A	A	A	C	T	N	A	A	A	A	A	A	A	A	T	T	T	C	A	A	T	T	C	T	G	C	A	A	A	A	A	T	A
T	C	T	G	T	T	T	T	A	T	G	G	T	G	T	G	T	T	T	C	C	G	N	T	T	T	T	T	C	T	T	G	T	T	A	T	T	T	T	C	G	C	A	T	T	T	T	T	T	T
T	A	T	T	G	T	T	G	T	T	T	T	T	T	G	G	T	G	G	A	A	T	N	G	G	G	G	T	A	C	G	T	T	A	C	G	G	T	T	T	T	A	C	T	G	G	T	T	T	G
G	A	G	C	T	G	G	T	T	T	C	C	G	C	T	G	G	T	T	C	T	T	N	T	T	G	T	T	C	T	T	T	G	A	C	T	T	G	G	T	C	G	C	T	T	T	T	T	T	T
T	T	T	C	C	T	A	C	A	T	C	C	T	C	C	A	T	C	C	C	A	A	N	C	C	G	C	T	C	T	C	A	T	A	T	C	C	T	T	A	C	A	T	T	C	C	T	T	G	C
A	G	A	A	C	A	C	C	A	G	A	A	A	A	C	A	A	C	C	T	A	A	N	C	C	G	C	G	T	C	C	A	A	T	T	C	C	A	A	A	A	C	T	G	C	C	G	G	T	C
T	G	T	A	A	T	A	A	A	T	A	A	T	A	A	T	T	A	A	T	T	A	N	A	A	A	A	T	T	A	A	A	T	T	C	A	A	T	T	A	A	A	C	T	A	A	T	T	A	A
T	G	T	A	A	T	T	A	T	A	A	A	T	A	A	G	T	A	A	C	C	A	N	A	A	A	A	A	C	A	A	A	T	C	A	A	A	T	T	T	A	C	A	A	A	A	A	A	T	A
T	G	T	T	A	T	C	A	T	T	T	T	T	T	A	T	T	A	A	A	A	T	N	A	A	T	A	T	A	T	A	T	T	C	A	A	A	T	T	T	T	C	A	T	A	A	T	T	T	A
C	A	C	T	T	C	T	T	G	T	T	T	C	T	T	C	C	T	T	A	A	T	N	T	T	G	T	T	A	G	T	T	C	A	T	T	T	C	C	C	T	T	T	T	T	T	T	T	T	T
C	A	C	T	T	C	T	T	G	T	T	T	C	T	T	C	C	T	T	T	G	T	N	T	T	T	T	T	T	G	T	T	C	T	G	T	T	C	C	C	T	T	G	T	T	T	T	T	C	T
C	T	C	T	T	C	C	T	C	C	T	T	C	T	T	A	C	T	T	G	A	A	N	T	T	C	T	C	G	G	T	A	C	A	G	T	T	C	C	A	T	T	G	C	T	T	C	C	C	T
T	G	T	G	T	T	A	T	A	C	G	G	T	G	T	A	T	T	T	G	C	T	N	T	T	C	T	C	G	G	T	T	T	A	G	T	T	T	T	T	G	T	G	C	T	T	C	C	C	T
T	T	T	T	G	T	A	G	A	C	T	T	T	T	G	A	T	G	G	G	T	T	N	G	G	A	G	C	G	A	G	T	T	T	G	G	G	T	T	A	T	G	G	C	G	G	C	C	T	G
A	C	A	A	T	A	T	T	A	T	A	A	A	A	T	T	A	T	T	G	A	G	N	T	T	A	T	T	G	A	T	G	A	C	A	T	T	A	A	A	A	A	A	T	T	T	T	T	T	T
A	C	A	T	A	A	G	A	G	T	T	T	A	T	A	T	A	A	A	A	T	T	N	A	A	A	A	T	A	T	A	T	A	A	A	A	A	A	A	T	T	A	A	T	A	A	T	T	A	A
A	A	A	T	T	A	G	T	A	A	T	T	A	T	T	T	A	T	T	A	T	C	N	T	T	T	T	A	A	G	T	C	A	A	T	T	T	A	A	C	T	A	T	A	T	T	A	A	A	T
T	A	T	T	T	T	G	T	A	A	T	T	T	T	T	T	T	T	T	T	C	C	N	T	T	T	T	A	T	T	T	C	T	G	G	T	T	T	T	A	T	T	G	A	T	T	A	A	A	T
T	A	T	C	T	T	G	T	A	A	C	C	T	C	T	G	T	T	T	G	A	A	N	T	T	T	T	A	G	C	T	A	T	A	T	T	T	T	T	A	C	T	T	A	T	T	A	A	T	T
C	T	C	C	C	C	A	C	T	T	C	C	C	C	C	T	C	C	C	T	A	G	N	C	C	T	C	T	T	C	C	G	C	C	C	C	C	C	C	G	C	A	C	T	C	C	T	T	T	C
C	T	C	C	C	C	A	C	T	T	C	C	C	C	C	A	C	C	C	C	C	C	N	C	C	G	C	T	C	A	C	C	C	T	C	C	C	C	C	A	C	A	C	T	C	C	T	T	C	C
A	T	A	T	C	A	T	C	T	C	T	T	A	T	C	T	A	C	C	C	C	A	N	C	C	T	C	C	C	A	C	A	A	A	A	C	C	A	A	C	T	A	A	C	C	C	C	C	C	C
T	T	T	T	T	T	G	T	G	C	T	T	T	T	T	T	T	T	T	A	A	T	N	T	T	A	T	C	A	A	T	T	T	T	A	T	T	T	T	T	T	T	A	C	T	T	C	C	A	T
A	G	A	A	T	A	T	T	A	A	A	A	A	A	T	T	A	T	T	A	A	G	N	T	T	T	T	A	A	T	T	G	A	T	A	T	T	A	A	A	A	T	A	A	T	T	A	A	T	T
A	T	A	A	A	A	C	A	C	T	A	A	A	A	A	C	A	A	A	A	G	T	N	A	A	T	A	T	A	T	A	T	A	C	T	A	A	A	A	T	A	G	T	T	A	A	T	T	A	A
T	A	T	A	A	T	C	A	A	A	A	A	T	A	A	C	T	A	A	T	G	C	N	A	A	T	A	A	T	T	A	C	T	A	T	A	A	T	T	T	A	G	T	A	A	A	A	A	A	A
C	T	C	T	A	C	A	A	T	A	T	T	C	T	A	C	C	A	A	T	G	A	N	A	A	C	A	A	T	T	A	A	C	A	T	A	A	C	C	C	T	C	T	A	A	A	A	A	T	A
A	T	A	T	T	A	A	T	C	T	T	T	A	T	T	T	A	T	T	T	T	C	N	T	T	C	T	T	T	G	T	C	A	C	T	T	T	A	A	A	T	A	T	T	T	T	T	T	C	T
A	T	A	C	T	A	A	T	T	C	C	C	A	C	T	T	A	T	T	T	T	A	N	T	T	C	T	C	T	T	T	A	A	C	G	T	T	A	A	A	C	A	G	C	T	T	C	C	A	T
G	C	G	C	C	G	T	C	T	A	C	C	G	C	C	A	G	C	C	G	G	A	N	C	C	T	C	A	G	A	C	A	G	A	T	C	C	G	G	C	C	A	T	A	C	C	A	A	A	C
A	C	A	A	C	A	T	C	C	A	A	A	A	A	C	A	A	C	C	T	A	T	N	C	C	T	C	A	T	T	C	T	A	A	A	C	C	A	A	C	A	G	A	A	C	C	A	A	G	C
C	C	C	T	A	C	T	A	A	G	T	T	C	T	A	A	C	A	A	A	A	T	N	A	A	A	A	G	A	T	A	T	C	G	T	A	A	C	C	A	T	A	T	G	A	A	G	G	A	A
T	T	T	A	T	T	T	T	A	A	A	A	T	A	T	T	T	T	T	T	A	C	N	T	T	A	T	A	T	T	T	C	T	G	T	T	T	T	T	A	A	A	T	A	T	T	A	A	C	T
A	T	A	A	A	A	G	A	T	C	A	A	A	A	A	T	A	A	A	T	A	A	N	A	A	A	A	C	T	C	A	A	A	G	T	A	A	A	A	G	A	A	T	C	A	A	C	C	T	A
T	A	T	T	A	T	T	A	G	T	T	T	T	T	A	C	T	A	A	T	G	G	N	A	A	T	A	T	T	C	A	G	T	T	C	A	A	T	T	G	T	T	C	T	A	A	T	T	A	A
T	A	T	C	T	T	A	T	G	A	C	C	T	C	T	C	T	T	T	C	A	A	N	T	T	T	T	A	C	C	T	A	T	T	C	T	T	T	T	G	C	T	C	A	T	T	A	A	T	T
C	A	C	A	C	C	T	C	G	T	A	A	C	A	C	A	C	C	C	C	A	A	N	C	C	C	C	T	C	T	C	A	C	G	C	C	C	C	C	T	A	T	C	T	C	C	T	T	T	C
A	T	A	A	A	A	T	A	G	T	A	A	A	A	A	T	A	A	A	C	A	G	N	A	A	C	A	T	C	T	A	G	A	A	T	A	A	A	A	T	A	G	T	T	A	A	T	T	C	A
A	T	A	G	A	A	T	A	A	C	G	G	A	G	A	A	A	A	A	T	A	T	N	A	A	A	A	C	T	A	A	T	A	A	T	A	A	A	A	G	G	A	T	C	A	A	C	C	A	A
C	C	C	A	G	C	C	G	A	A	A	A	C	A	G	A	C	G	G	T	A	A	N	G	G	T	G	A	T	A	G	A	C	A	A	G	G	C	C	A	A	C	A	A	G	G	A	A	A	G
C	C	C	C	A	C	C	A	T	A	C	C	C	C	A	T	C	A	A	A	G	G	N	A	A	A	A	A	A	A	A	G	C	A	A	A	A	C	C	A	C	A	A	A	A	A	A	A	C	A
A	A	A	T	C	A	C	C	G	C	T	T	A	T	C	C	A	C	C	A	C	G	N	C	C	A	C	C	A	T	C	G	A	G	A	C	C	A	A	A	T	T	A	C	C	C	C	C	C	C
A	T	A	A	T	A	T	T	T	C	A	A	A	A	T	A	A	T	T	A	T	A	N	T	T	T	T	C	A	T	T	A	A	A	T	T	T	A	A	A	A	C	T	C	T	T	C	C	A	T
G	A	G	T	A	G	T	A	C	A	T	T	G	T	A	A	G	A	A	T	T	C	N	A	A	C	A	A	T	C	A	C	G	A	T	A	A	G	G	G	T	T	T	A	A	A	A	A	A	A
G	A	G	T	T	G	A	T	C	A	T	T	G	T	T	G	G	T	T	T	G	C	N	T	T	A	T	A	T	C	T	C	G	A	C	T	T	G	G	A	T	T	C	A	T	T	A	A	G	T
G	T	G	C	T	G	A	T	A	G	C	C	G	C	T	A	G	T	T	C	A	T	N	T	T	A	T	G	C	A	T	T	G	A	C	T	T	G	G	A	C	C	C	G	T	T	G	G	G	T
T	C	T	A	C	T	A	C	A	G	A	A	T	A	C	C	T	C	C	C	T	G	N	C	C	G	C	G	C	T	C	G	T	A	A	C	C	T	T	A	A	A	A	G	C	C	G	G	G	C
T	A	T	A	A	T	T	A	A	G	A	A	T	A	A	T	T	A	A	A	G	A	N	A	A	A	A	G	A	A	A	A	T	G	T	A	A	T	T	A	A	A	T	G	A	A	G	G	T	A
G	A	G	C	A	G	T	A	T	T	C	C	G	C	A	A	G	A	A	T	G	G	N	A	A	C	A	T	T	A	A	G	G	C	A	A	A	G	G	A	C	T	A	T	A	A	T	T	T	A
A	G	A	C	C	A	C	C	T	T	C	C	A	C	C	T	A	C	C	A	C	C	N	C	C	T	C	T	A	T	C	C	A	T	A	C	C	A	A	G	C	G	A	T	C	C	T	T	G	C
A	A	A	A	C	A	C	C	T	G	A	A	A	A	C	T	A	C	C	A	T	A	N	C	C	A	C	G	A	C	C	A	A	T	T	C	C	A	A	C	A	G	T	G	C	C	G	G	A	C
A	C	A	A	A	A	A	A	T	A	A	A	A	A	A	C	A	A	A	T	T	T	N	A	A	T	A	A	T	A	A	T	A	G	C	A	A	A	A	T	A	G	C	A	A	A	A	A	A	A
A	T	A	G	A	A	T	A	G	A	G	G	A	G	A	A	A	A	A	C	T	A	N	A	A	T	A	A	C	A	A	A	A	A	A	A	A	A	A	T	G	G	A	A	A	A	A	A	A	A
G	A	G	G	G	G	A	G	T	A	G	G	G	G	G	A	G	G	G	A	A	G	N	G	G	C	G	A	A	G	G	G	G	T	A	G	G	G	G	G	G	A	A	A	G	G	A	A	A	G
A	T	A	G	G	A	A	G	A	A	G	G	A	G	G	C	A	G	G	A	T	T	N	G	G	A	G	A	A	A	G	T	A	G	G	G	G	A	A	A	G	A	G	A	G	G	A	A	G	G
A	T	A	T	G	A	T	G	T	G	T	T	A	T	G	C	A	G	G	G	G	C	N	G	G	A	G	G	G	C	G	C	A	G	A	G	G	A	A	T	T	T	A	G	G	G	G	G	A	G
A	C	A	T	T	A	C	T	T	A	T	T	A	T	T	A	A	T	T	A	G	T	N	T	T	C	T	A	A	T	T	T	A	C	C	T	T	A	A	G	T	G	C	A	T	T	A	A	A	T
A	A	A	G	T	A	A	T	T	A	G	G	A	G	T	A	A	T	T	C	G	T	N	T	T	C	T	A	C	A	T	T	A	T	T	T	T	A	A	G	G	T	T	A	T	T	A	A	A	T
A	A	A	A	G	A	A	G	C	A	A	A	A	A	G	G	A	G	G	T	T	G	N	G	G	A	G	A	T	T	G	G	A	T	A	G	G	A	A	C	A	C	A	A	G	G	A	A	A	G
G	C	G	A	A	G	G	A	C	A	A	A	G	A	A	G	G	A	A	A	A	C	N	A	A	A	A	A	A	T	A	C	G	T	T	A	A	G	G	T	A	C	T	A	A	A	A	A	A	A
C	C	C	A	A	C	A	A	C	A	A	A	C	A	A	G	C	A	A	T	G	C	N	A	A	G	A	A	T	C	A	C	C	A	T	A	A	C	C	T	A	A	T	A	A	A	A	A	G	A
T	A	T	A	A	T	C	A	T	G	A	A	T	A	A	T	T	A	A	T	A	G	N	A	A	G	A	G	T	A	A	G	T	T	C	A	A	T	T	T	A	A	C	G	A	A	G	G	C	A
T	A	T	G	A	T	T	A	T	C	G	G	T	G	A	T	T	A	A	C	A	A	N	A	A	G	A	C	C	A	A	A	T	G	A	A	A	T	T	A	G	A	A	C	A	A	C	C	T	A
G	G	G	A	G	G	A	G	A	T	A	A	G	A	G	G	G	G	G	A	T	A	N	G	G	T	G	T	A	C	G	A	G	G	A	G	G	G	G	T	A	T	A	T	G	G	T	T	T	G
A	G	A	A	A	A	T	A	A	T	A	A	A	A	A	A	A	A	A	A	T	T	N	A	A	T	A	T	A	C	A	T	A	G	C	A	A	A	A	G	A	T	C	T	A	A	T	T	G	A
T	G	T	A	A	T	T	A	A	G	A	A	T	A	A	A	T	A	A	C	C	A	N	A	A	G	A	G	C	A	A	A	T	T	C	A	A	T	T	G	A	T	C	G	A	A	G	G	A	A
G	T	G	A	A	G	C	A	T	A	A	A	G	A	A	A	G	A	A	C	G	C	N	A	A	A	A	A	C	A	A	C	G	A	A	A	A	G	G	G	A	T	A	A	A	A	A	A	T	A
G	T	G	A	A	G	A	A	T	T	A	A	G	A	A	A	G	A	A	A	A	C	N	A	A	A	A	T	A	G	A	C	G	G	A	A	A	G	G	T	A	G	A	T	A	A	T	T	G	A
C	G	C	G	A	C	A	A	C	G	G	G	C	G	A	G	C	A	A	A	T	A	N	A	A	A	A	G	A	G	A	A	C	A	G	A	A	C	C	A	G	T	G	G	A	A	G	G	G	A
T	A	T	C	G	T	C	G	C	G	C	C	T	C	G	A	T	G	G	G	C	T	N	G	G	A	G	G	G	G	G	T	T	A	G	G	G	T	T	G	C	A	G	G	G	G	G	G	C	G
T	A	T	T	C	T	C	C	A	C	T	T	T	T	C	A	T	C	C	G	T	A	N	C	C	G	C	C	G	T	C	A	T	T	G	C	C	T	T	A	T	T	G	C	C	C	C	C	T	C
T	A	T	T	T	T	A	T	T	T	T	T	T	T	T	A	T	T	T	G	G	A	N	T	T	A	T	T	G	T	T	A	T	T	T	T	T	T	T	A	T	T	T	T	T	T	T	T	T	T
A	A	A	G	T	A	A	T	A	T	G	G	A	G	T	A	A	T	T	T	T	T	N	T	T	A	T	T	T	G	T	T	A	C	T	T	T	A	A	T	G	T	T	T	T	T	T	T	T	T
T	G	T	A	G	T	G	G	A	T	A	A	T	A	G	A	T	G	G	T	C	G	N	G	G	A	G	T	T	A	G	G	T	G	G	G	G	T	T	T	A	C	G	T	G	G	T	T	A	G
G	A	G	T	A	G	G	A	T	A	T	T	G	T	A	G	G	A	A	G	T	A	N	A	A	A	A	A	G	A	A	A	G	A	A	A	A	G	G	C	T	C	A	A	A	A	A	A	T	A
G	A	G	G	T	G	G	T	C	T	G	G	G	G	T	C	G	T	T	A	A	A	N	T	T	A	T	T	A	A	T	A	G	T	A	T	T	G	G	G	G	C	A	T	T	T	T	T	G	T
G	A	G	G	G	G	T	G	A	G	G	G	G	G	G	T	G	G	G	A	T	T	N	G	G	G	G	G	A	A	G	T	G	C	A	G	G	G	G	A	G	T	A	G	G	G	G	G	G	G
T	A	T	C	G	T	T	G	A	G	C	C	T	C	G	T	T	G	G	A	C	C	N	G	G	C	G	G	A	G	G	C	T	T	A	G	G	T	T	T	C	T	A	G	G	G	G	G	G	G
A	A	A	T	C	A	G	C	G	G	T	T	A	T	C	G	A	C	C	A	C	T	N	C	C	T	C	G	A	A	C	T	A	G	G	C	C	A	A	C	T	A	G	G	C	C	G	G	T	C
G	G	G	T	T	G	A	T	A	T	T	T	G	T	T	A	G	T	T	G	A	G	N	T	T	T	T	T	G	A	T	G	G	T	A	T	T	G	G	T	T	A	A	T	T	T	T	T	A	T
A	C	A	T	T	A	A	T	C	A	T	T	A	T	T	T	A	T	T	A	G	G	N	T	T	G	T	A	A	A	T	G	A	C	A	T	T	A	A	G	T	A	A	A	T	T	A	A	G	T
A	T	A	A	T	A	A	T	T	G	A	A	A	A	T	G	A	T	T	A	T	C	N	T	T	A	T	G	A	A	T	C	A	T	A	T	T	A	A	T	A	T	A	G	T	T	G	G	A	T
T	T	T	T	A	T	A	A	A	A	T	T	T	T	A	G	T	A	A	A	T	T	N	A	A	T	A	A	A	A	A	T	T	A	A	A	A	T	T	C	T	T	A	A	A	A	A	A	A	A
T	G	T	G	T	T	G	T	T	A	G	G	T	G	T	C	T	T	T	A	G	T	N	T	T	G	T	A	A	G	T	T	T	T	A	T	T	T	T	T	G	C	A	A	T	T	A	A	T	T
C	A	C	G	G	C	A	G	T	T	G	G	C	G	G	T	C	G	G	A	C	G	N	G	G	G	G	T	A	C	G	G	C	C	G	G	G	C	C	A	G	C	G	T	G	G	T	T	T	G
G	T	G	G	G	G	A	G	C	T	G	G	G	G	G	T	G	G	G	G	G	A	N	G	G	C	G	T	G	T	G	A	G	C	C	G	G	G	G	T	G	A	C	T	G	G	T	T	C	G
A	G	A	T	G	A	A	G	A	C	T	T	A	T	G	T	A	G	G	C	T	A	N	G	G	T	G	C	C	T	G	A	A	A	T	G	G	A	A	C	T	T	T	C	G	G	C	C	G	G
T	G	T	A	T	T	A	T	A	G	A	A	T	A	T	A	T	T	T	T	C	A	N	T	T	T	T	G	T	G	T	A	T	G	T	T	T	T	T	C	A	A	T	G	T	T	G	G	A	T
C	C	C	G	A	C	A	A	C	A	G	G	C	G	A	T	C	A	A	T	A	A	N	A	A	T	A	A	T	A	A	A	C	T	G	A	A	C	C	A	G	A	G	A	A	A	A	A	T	A
T	T	T	A	G	T	G	G	C	T	A	A	T	A	G	G	T	G	G	G	C	C	N	G	G	A	G	T	G	T	G	C	T	T	A	G	G	T	T	G	A	T	A	T	G	G	T	T	C	G
G	T	G	A	A	G	C	A	A	C	A	A	G	A	A	G	G	A	A	A	C	C	N	A	A	T	A	C	A	G	A	C	G	G	T	A	A	G	G	T	A	C	T	C	A	A	C	C	T	A
T	T	T	T	A	T	T	A	A	T	T	T	T	T	A	G	T	A	A	T	A	A	N	A	A	G	A	T	T	G	A	A	T	C	G	A	A	T	T	T	T	A	G	T	A	A	T	T	G	A
C	A	C	T	T	C	T	T	G	G	T	T	C	T	T	T	C	T	T	G	A	T	N	T	T	G	T	G	G	C	T	T	C	G	G	T	T	C	C	G	T	A	G	G	T	T	G	G	T	T
T	T	T	C	T	T	G	T	G	T	C	C	T	C	T	A	T	T	T	G	A	T	N	T	T	G	T	T	G	T	T	T	T	T	C	T	T	T	T	C	C	G	C	T	T	T	T	T	C	T
A	G	A	G	C	A	A	C	G	C	G	G	A	G	C	G	A	C	C	C	T	C	N	C	C	T	C	C	C	T	C	C	A	C	T	C	C	A	A	G	G	A	T	C	C	C	C	C	T	C
T	G	T	A	G	T	T	G	T	T	A	A	T	A	G	A	T	G	G	T	G	T	N	G	G	A	G	T	T	T	G	T	T	A	T	G	G	T	T	T	A	C	T	T	G	G	T	T	A	G
C	G	C	T	A	C	G	A	T	A	T	T	C	T	A	A	C	A	A	T	A	T	N	A	A	G	A	A	T	A	A	T	C	C	T	A	A	C	C	C	T	T	T	A	A	A	A	A	T	A
C	T	C	C	T	C	G	T	G	T	C	C	C	C	T	T	C	T	T	T	A	C	N	T	T	A	T	T	T	T	T	C	C	C	A	T	T	C	C	A	C	A	A	T	T	T	T	T	C	T
A	A	A	T	C	A	C	C	A	C	T	T	A	T	C	T	A	C	C	A	T	G	N	C	C	A	C	C	A	G	C	G	A	A	T	C	C	A	A	C	T	T	T	C	C	C	C	C	C	C
G	G	G	G	T	G	T	T	A	C	G	G	G	G	T	C	G	T	T	T	G	T	N	T	T	T	T	C	T	G	T	T	G	A	G	T	T	G	G	C	G	T	G	C	T	T	C	C	A	T
T	A	T	T	G	T	T	G	A	A	T	T	T	T	G	G	T	G	G	G	C	A	N	G	G	T	G	A	G	G	G	A	T	A	G	G	G	T	T	A	T	C	G	A	G	G	A	A	G	G
T	A	T	C	T	T	T	T	A	G	C	C	T	C	T	A	T	T	T	G	A	A	N	T	T	C	T	G	G	T	T	A	T	T	G	T	T	T	T	A	C	A	G	G	T	T	G	G	T	T
G	T	G	T	C	G	A	C	G	T	T	T	G	T	C	T	G	C	C	G	A	G	N	C	C	G	C	T	G	A	C	G	G	G	T	C	C	G	G	A	T	A	T	T	C	C	T	T	T	C
C	T	C	A	T	C	T	T	A	T	A	A	C	A	T	C	C	T	T	T	C	G	N	T	T	A	T	T	T	G	T	G	C	A	A	T	T	C	C	T	A	C	A	T	T	T	T	T	G	T
G	C	G	T	A	G	G	A	A	G	T	T	G	T	A	T	G	A	A	A	C	G	N	A	A	T	A	G	A	A	A	G	G	A	G	A	A	G	G	G	T	C	G	G	A	A	G	G	C	A
T	G	T	C	T	T	G	T	A	C	C	C	T	C	T	G	T	T	T	G	A	T	N	T	T	C	T	C	G	A	T	T	T	T	A	T	T	T	T	A	C	A	A	C	T	T	C	C	G	T
C	A	C	C	C	C	G	C	A	G	C	C	C	C	C	T	C	C	C	A	A	G	N	C	C	T	C	G	A	T	C	G	C	G	A	C	C	C	C	A	C	A	A	G	C	C	G	G	T	C
A	T	A	A	C	A	T	C	A	T	A	A	A	A	C	C	A	C	C	A	A	G	N	C	C	G	C	T	A	T	C	G	A	C	T	C	C	A	A	T	A	G	T	T	C	C	T	T	C	C
C	C	C	G	A	C	A	A	G	C	G	G	C	G	A	T	C	A	A	T	T	T	N	A	A	T	A	C	T	C	A	T	C	A	T	A	A	C	C	G	G	G	T	C	A	A	C	C	A	A
C	T	C	T	G	C	G	G	C	A	T	T	C	T	G	A	C	G	G	T	G	C	N	G	G	C	G	A	T	G	G	C	C	A	C	G	G	C	C	C	T	G	C	A	G	G	A	A	C	G
A	G	A	T	T	A	A	T	T	C	T	T	A	T	T	T	A	T	T	C	T	G	N	T	T	T	T	C	C	A	T	G	A	C	G	T	T	A	A	A	T	T	G	C	T	T	C	C	C	T
A	T	A	G	T	A	A	T	T	C	G	G	A	G	T	C	A	T	T	G	G	C	N	T	T	A	T	C	G	T	T	C	A	C	A	T	T	A	A	A	G	T	A	C	T	T	C	C	A	T
A	C	A	C	G	A	T	G	G	A	C	C	A	C	G	C	A	G	G	A	C	A	N	G	G	T	G	A	A	C	G	A	A	A	T	G	G	A	A	C	C	G	T	A	G	G	A	A	A	G
T	T	T	G	C	T	T	C	A	A	G	G	T	G	C	A	T	C	C	T	C	C	N	C	C	C	C	A	T	T	C	C	T	A	C	C	C	T	T	C	G	A	C	A	C	C	A	A	A	C
G	A	G	T	G	G	C	G	T	A	T	T	G	T	G	G	G	G	G	C	T	T	N	G	G	C	G	A	C	G	G	T	G	A	T	G	G	G	G	A	T	A	T	A	G	G	A	A	T	G
A	T	A	C	T	A	G	T	G	T	C	C	A	C	T	T	A	T	T	T	T	A	N	T	T	A	T	T	T	T	T	A	A	T	G	T	T	A	A	A	C	A	G	T	T	T	T	T	G	T
A	C	A	A	C	A	A	C	G	G	A	A	A	A	C	T	A	C	C	G	T	T	N	C	C	G	C	G	G	C	C	T	A	G	T	C	C	A	A	A	A	A	T	G	C	C	G	G	A	C
T	C	T	C	A	T	T	A	C	A	C	C	T	C	A	G	T	A	A	T	C	T	N	A	A	T	A	A	T	T	A	T	T	T	C	A	A	T	T	T	C	G	C	A	A	A	A	A	A	A
G	A	G	C	C	G	C	C	T	A	C	C	G	C	C	C	G	C	C	C	A	G	N	C	C	T	C	A	C	A	C	G	G	G	T	C	C	G	G	G	C	A	T	A	C	C	A	A	T	C
C	G	C	A	C	C	T	C	T	T	A	A	C	A	C	G	C	C	C	T	A	C	N	C	C	G	C	T	T	T	C	C	C	C	A	C	C	C	C	T	A	A	A	T	C	C	T	T	G	C
A	T	A	A	A	A	G	A	T	G	A	A	A	A	A	T	A	A	A	A	C	C	N	A	A	C	A	G	A	C	A	C	A	C	T	A	A	A	A	G	A	A	T	G	A	A	G	G	C	A
A	T	A	A	A	A	T	A	A	C	A	A	A	A	A	C	A	A	A	T	T	T	N	A	A	G	A	C	T	C	A	T	A	T	C	A	A	A	A	C	A	A	C	C	A	A	C	C	A	A
C	G	C	T	A	C	C	A	T	A	T	T	C	T	A	A	C	A	A	C	C	T	N	A	A	T	A	A	C	A	A	T	C	T	C	A	A	C	C	C	T	A	C	A	A	A	A	A	A	A
C	C	C	G	T	C	T	T	G	A	G	G	C	G	T	C	C	T	T	C	T	T	N	T	T	C	T	A	C	G	T	T	C	T	A	T	T	C	C	T	G	G	A	A	T	T	A	A	C	T
A	G	A	A	G	A	A	G	G	C	A	A	A	A	G	C	A	G	G	A	C	G	N	G	G	A	G	C	A	T	G	G	A	C	G	G	G	A	A	T	A	C	G	C	G	G	C	C	C	G
A	T	A	A	A	A	T	A	G	C	A	A	A	A	A	A	A	A	A	G	A	G	N	A	A	C	A	C	G	T	A	G	A	A	T	A	A	A	A	T	A	T	T	C	A	A	C	C	A	A
A	C	A	T	A	A	C	A	T	A	T	T	A	T	A	A	A	A	A	T	T	A	N	A	A	C	A	A	T	G	A	A	A	A	T	A	A	A	A	C	T	T	T	A	A	A	A	A	A	A
T	A	T	G	T	T	C	T	A	A	G	G	T	G	T	A	T	T	T	T	G	G	N	T	T	A	T	A	T	C	T	G	T	C	G	T	T	T	T	A	G	G	G	A	T	T	A	A	A	T
G	C	G	C	G	G	A	G	G	A	C	C	G	C	G	T	G	G	G	G	A	G	N	G	G	A	G	A	G	G	G	G	G	T	C	G	G	G	G	A	C	A	C	A	G	G	A	A	T	G
T	C	T	A	C	T	G	C	A	T	A	A	T	A	C	G	T	C	C	C	A	C	N	C	C	A	C	T	C	T	C	C	T	C	G	C	C	T	T	C	A	T	G	T	C	C	T	T	G	C
G	A	G	A	A	G	T	A	A	G	A	A	G	A	A	A	G	A	A	G	G	T	N	A	A	T	A	G	G	C	A	T	G	T	T	A	A	G	G	T	A	G	T	G	A	A	G	G	T	A
C	A	C	C	A	C	T	A	T	T	C	C	C	C	A	A	C	A	A	T	T	G	N	A	A	G	A	T	T	A	A	G	C	C	C	A	A	C	C	C	C	G	C	T	A	A	T	T	G	A
C	A	C	C	C	C	G	C	T	G	C	C	C	C	C	T	C	C	C	C	G	T	N	C	C	A	C	G	C	C	C	T	C	A	A	C	C	C	C	T	C	C	A	G	C	C	G	G	C	C
T	T	T	A	C	T	C	C	C	C	A	A	T	A	C	G	T	C	C	A	T	G	N	C	C	A	C	C	A	C	C	G	T	T	C	C	C	T	T	C	A	T	C	C	C	C	C	C	C	C
T	G	T	A	A	T	G	A	G	C	A	A	T	A	A	C	T	A	A	C	G	T	N	A	A	T	A	C	C	A	A	T	T	G	C	A	A	T	T	A	A	T	C	C	A	A	C	C	T	A
T	A	T	A	A	T	T	A	A	T	A	A	T	A	A	A	T	A	A	C	A	G	N	A	A	G	A	T	C	A	A	G	T	A	A	A	A	T	T	T	A	T	A	T	A	A	T	T	T	A
C	A	C	T	A	C	C	A	T	T	T	T	C	T	A	A	C	A	A	A	T	T	N	A	A	C	A	T	A	A	A	T	C	A	A	A	A	C	C	G	T	A	A	T	A	A	T	T	T	A
A	T	A	G	T	A	A	T	C	T	G	G	A	G	T	C	A	T	T	A	C	T	N	T	T	A	T	T	A	T	T	T	A	G	A	T	T	A	A	A	G	T	A	T	T	T	T	T	C	T
A	G	A	T	G	A	C	G	T	C	T	T	A	T	G	C	A	G	G	A	A	C	N	G	G	A	G	C	A	G	G	C	A	T	T	G	G	A	A	A	T	G	T	C	G	G	C	C	A	G
C	C	C	G	T	C	C	T	G	A	G	G	C	G	T	A	C	T	T	T	T	T	N	T	T	C	T	A	T	A	T	T	C	G	G	T	T	C	C	G	G	G	G	A	T	T	A	A	A	T
T	A	T	C	G	T	A	G	T	A	C	C	T	C	G	A	T	G	G	G	T	C	N	G	G	C	G	A	G	A	G	C	T	T	A	G	G	T	T	T	C	G	A	A	G	G	A	A	C	G
C	A	C	C	C	C	A	C	C	C	C	C	C	C	C	A	C	C	C	A	G	T	N	C	C	A	C	C	A	T	C	T	C	G	A	C	C	C	C	G	C	T	A	C	C	C	C	C	T	C
T	C	T	T	C	T	A	C	T	T	T	T	T	T	C	T	T	C	C	A	T	T	N	C	C	A	C	T	A	G	C	T	T	A	T	C	C	T	T	T	T	A	T	T	C	C	T	T	C	C
C	C	C	T	T	C	T	T	A	C	T	T	C	T	T	G	C	T	T	T	G	A	N	T	T	A	T	C	T	C	T	A	C	T	G	T	T	C	C	G	T	G	G	C	T	T	C	C	T	T
A	A	A	T	T	A	G	T	T	T	T	T	A	T	T	T	A	T	T	G	G	T	N	T	T	T	T	T	G	A	T	T	A	C	C	T	T	A	A	A	T	A	C	T	T	T	T	T	C	T
T	A	T	C	T	T	A	T	C	C	C	C	T	C	T	G	T	T	T	C	T	G	N	T	T	G	T	C	C	A	T	G	T	A	A	T	T	T	T	T	C	A	A	C	T	T	C	C	A	T
G	A	G	A	C	G	A	C	C	A	A	A	G	A	C	C	G	C	C	A	G	T	N	C	C	T	C	A	A	C	C	T	G	T	A	C	C	G	G	C	A	T	A	A	C	C	A	A	T	C
A	T	A	A	A	A	T	A	A	T	A	A	A	A	A	C	A	A	A	A	A	T	N	A	A	G	A	T	A	C	A	T	A	T	C	A	A	A	A	A	A	T	C	T	A	A	T	T	G	A
A	G	A	C	A	A	G	A	G	G	C	C	A	C	A	T	A	A	A	C	A	G	N	A	A	C	A	G	C	A	A	G	A	G	C	A	A	A	A	T	C	C	C	G	A	A	G	G	A	A
G	T	G	T	C	G	C	C	T	A	T	T	G	T	C	T	G	C	C	C	A	G	N	C	C	C	C	A	C	A	C	G	G	T	A	C	C	G	G	T	T	G	A	A	C	C	A	A	A	C
T	G	T	C	T	T	A	T	T	A	C	C	T	C	T	T	T	T	T	A	C	T	N	T	T	T	T	A	A	A	T	T	T	G	A	T	T	T	T	G	C	A	A	A	T	T	A	A	G	T
G	C	G	T	C	G	A	C	G	G	T	T	G	T	C	C	G	C	C	A	T	T	N	C	C	T	C	G	A	T	C	T	G	G	A	C	C	G	G	T	T	T	A	G	C	C	G	G	T	C
T	C	T	C	T	T	C	T	C	T	C	C	T	C	T	A	T	T	T	A	T	G	N	T	T	T	T	T	A	G	T	G	T	T	T	T	T	T	T	G	C	C	T	T	T	T	T	T	G	T
G	T	G	A	C	G	C	C	G	G	A	A	G	A	C	A	G	C	C	T	C	C	N	C	C	C	C	G	T	T	C	C	G	G	G	C	C	G	G	G	A	T	G	G	C	C	G	G	T	C
A	T	A	T	A	A	A	A	T	T	T	T	A	T	A	C	A	A	A	G	A	C	N	A	A	A	A	T	G	G	A	C	A	A	T	A	A	A	A	T	T	G	T	T	A	A	T	T	G	A
T	T	T	G	T	T	A	T	C	G	G	G	T	G	T	T	T	T	T	T	T	A	N	T	T	A	T	G	T	C	T	A	T	A	G	T	T	T	T	G	G	T	G	G	T	T	G	G	A	T
C	C	C	A	G	C	A	G	A	A	A	A	C	A	G	C	C	G	G	G	G	T	N	G	G	C	G	A	G	C	G	T	C	A	C	G	G	C	C	A	A	C	C	A	G	G	A	A	T	G
A	A	A	A	A	A	T	A	C	T	A	A	A	A	A	T	A	A	A	C	G	A	N	A	A	T	A	T	C	T	A	A	A	C	C	A	A	A	A	A	A	T	C	T	A	A	T	T	C	A
T	A	T	G	A	T	G	A	C	C	G	G	T	G	A	C	T	A	A	C	C	A	N	A	A	C	A	C	C	T	A	A	T	T	T	A	A	T	T	A	G	A	T	C	A	A	C	C	A	A
T	C	T	T	G	T	T	G	A	A	T	T	T	T	G	A	T	G	G	T	A	C	N	G	G	T	G	A	T	T	G	C	T	T	T	G	G	T	T	C	T	T	T	A	G	G	A	A	T	G
G	T	G	G	T	G	G	T	A	T	G	G	G	G	T	T	G	T	T	T	G	A	N	T	T	C	T	T	T	C	T	A	G	C	T	T	T	G	G	T	G	C	T	T	T	T	T	T	T	T
T	C	T	T	G	T	C	G	A	T	T	T	T	T	G	G	T	G	G	T	A	A	N	G	G	A	G	T	T	A	G	A	T	A	C	G	G	T	T	T	T	C	C	T	G	G	T	T	G	G
G	T	G	G	T	G	C	T	T	G	G	G	G	G	T	A	G	T	T	C	C	G	N	T	T	T	T	G	C	A	T	G	G	T	A	T	T	G	G	C	G	A	A	G	T	T	G	G	T	T
G	C	G	A	G	G	T	G	G	T	A	A	G	A	G	A	G	G	G	A	G	T	N	G	G	G	G	T	A	C	G	T	G	G	A	G	G	G	G	A	A	G	A	T	G	G	T	T	G	G
T	A	T	T	A	T	T	A	A	G	T	T	T	T	A	G	T	A	A	A	G	G	N	A	A	A	A	G	A	T	A	G	T	G	C	A	A	T	T	T	T	T	C	G	A	A	G	G	G	A
G	T	G	C	T	G	T	T	A	G	C	C	G	C	T	T	G	T	T	C	G	T	N	T	T	A	T	G	C	C	T	T	G	C	T	T	T	G	G	G	C	T	T	G	T	T	G	G	T	T
A	G	A	A	C	A	C	C	T	T	A	A	A	A	C	G	A	C	C	T	C	G	N	C	C	G	C	T	T	T	C	G	A	A	C	C	C	A	A	G	A	G	C	T	C	C	T	T	G	C
A	A	A	T	A	A	A	A	G	G	T	T	A	T	A	T	A	A	A	C	G	C	N	A	A	T	A	G	C	C	A	C	A	G	T	A	A	A	A	C	T	C	T	G	A	A	G	G	A	A
A	A	A	T	T	A	A	T	C	A	T	T	A	T	T	G	A	T	T	T	A	C	N	T	T	G	T	A	T	A	T	C	A	A	C	T	T	A	A	A	T	G	C	A	T	T	A	A	A	T
C	G	C	G	T	C	C	T	A	A	G	G	C	G	T	A	C	T	T	C	T	T	N	T	T	T	T	A	C	T	T	T	C	C	A	T	T	C	C	G	G	T	A	A	T	T	A	A	A	T
T	T	T	T	G	T	T	G	A	A	T	T	T	T	G	T	T	G	G	A	T	A	N	G	G	G	G	A	A	G	G	A	T	G	T	G	G	T	T	A	T	C	T	A	G	G	A	A	C	G
T	G	T	G	T	T	C	T	C	C	G	G	T	G	T	C	T	T	T	T	T	T	N	T	T	A	T	C	T	A	T	T	T	G	G	T	T	T	T	C	G	A	G	C	T	T	C	C	T	T
C	T	C	G	G	C	T	G	C	T	G	G	C	G	G	A	C	G	G	G	T	T	N	G	G	T	G	T	G	A	G	T	C	G	A	G	G	C	C	G	G	C	A	T	G	G	T	T	T	G
A	G	A	T	G	A	C	G	A	T	T	T	A	T	G	T	A	G	G	A	G	G	N	G	G	C	G	T	A	G	G	G	A	C	A	G	G	A	A	G	T	C	A	T	G	G	T	T	C	G
T	A	T	G	T	T	A	T	A	C	G	G	T	G	T	T	T	T	T	A	T	G	N	T	T	A	T	C	A	T	T	G	T	G	G	T	T	T	T	G	G	A	G	C	T	T	C	C	A	T
G	T	G	A	G	G	T	G	A	A	A	A	G	A	G	G	G	G	G	G	T	G	N	G	G	T	G	A	G	G	G	G	G	A	T	G	G	G	G	C	A	A	T	A	G	G	A	A	T	G
G	C	G	A	A	G	G	A	T	T	A	A	G	A	A	T	G	A	A	T	A	T	N	A	A	T	A	T	T	T	A	T	G	T	G	A	A	G	G	G	A	A	G	T	A	A	T	T	G	A
C	A	C	A	A	C	A	A	G	G	A	A	C	A	A	G	C	A	A	G	A	T	N	A	A	G	A	G	G	G	A	T	C	T	T	A	A	C	C	A	A	T	T	G	A	A	G	G	G	A
A	T	A	C	A	A	A	A	T	G	C	C	A	C	A	G	A	A	A	T	A	C	N	A	A	T	A	G	T	A	A	C	A	T	G	A	A	A	A	T	C	G	G	G	A	A	G	G	C	A
G	T	G	T	C	G	G	C	G	C	T	T	G	T	C	T	G	C	C	G	G	C	N	C	C	G	C	C	G	T	C	C	G	T	A	C	C	G	G	T	T	A	A	C	C	C	C	C	A	C
A	G	A	T	T	A	T	T	C	A	T	T	A	T	T	N	A	T	T	A	C	A	N	T	T	G	T	A	A	C	T	A	A	G	T	T	T	A	A	T	T	A	T	A	T	T	A	A	G	T
C	T	C	C	T	C	G	T	C	G	C	C	C	C	T	N	C	T	T	T	C	C	N	T	T	T	T	G	T	A	T	C	C	T	C	T	T	C	C	T	C	T	C	G	T	T	G	G	A	T
G	G	G	A	C	G	T	C	T	A	A	A	G	A	C	N	G	C	C	C	A	G	N	C	C	G	C	A	C	T	C	G	G	T	A	C	C	G	G	G	A	G	A	A	C	C	A	A	C	C
G	G	G	T	A	G	G	A	T	C	T	T	G	T	A	N	G	A	A	A	C	T	N	A	A	A	A	C	A	T	A	T	G	A	T	A	A	G	G	T	T	C	T	C	A	A	C	C	G	A
G	T	G	G	T	G	A	T	T	G	G	G	G	G	T	C	G	T	T	T	T	G	N	T	T	A	T	G	T	G	T	G	G	A	T	T	T	G	G	T	G	A	T	G	T	T	G	G	G	T
C	G	C	G	G	C	T	G	C	G	G	G	C	G	G	T	C	G	G	T	T	C	N	G	G	A	G	G	T	T	G	C	C	A	G	G	G	C	C	A	G	A	G	G	G	G	G	G	G	G
G	A	G	C	G	G	C	G	A	G	C	C	G	C	G	T	G	G	G	G	G	T	N	G	G	C	G	G	G	G	G	T	G	G	T	G	G	G	G	A	C	C	T	G	G	G	G	G	C	G
A	A	A	A	C	A	A	C	A	C	A	A	A	A	C	C	A	C	C	T	C	A	N	C	C	T	C	C	T	G	C	A	A	C	G	C	C	A	A	A	A	C	G	C	C	C	C	C	G	C
T	A	T	G	A	T	T	A	C	G	G	G	T	G	A	A	T	A	A	G	G	G	N	A	A	T	A	G	G	T	A	G	T	C	G	A	A	T	T	G	G	A	G	G	A	A	G	G	A	A
T	C	T	A	G	T	T	G	T	A	A	A	T	A	G	T	T	G	G	G	A	C	N	G	G	C	G	A	G	G	G	C	T	A	T	G	G	T	T	C	A	A	T	A	G	G	A	A	T	G
T	T	T	C	A	T	G	A	C	T	C	C	T	C	A	G	T	A	A	T	A	G	N	A	A	A	A	T	T	A	A	G	T	C	G	A	A	T	T	C	C	A	G	T	A	A	T	T	T	A
T	T	T	G	C	T	T	C	T	T	G	G	T	G	C	G	T	C	C	G	T	C	N	C	C	T	C	T	G	A	C	C	T	T	A	C	C	T	T	A	G	T	A	T	C	C	T	T	T	C
G	C	G	G	G	G	G	G	C	T	G	G	G	G	G	C	G	G	G	A	T	T	N	G	G	G	G	T	A	A	G	T	G	T	A	G	G	G	G	C	G	G	A	T	G	G	T	T	T	G
T	A	T	G	G	T	G	G	A	T	G	G	T	G	G	A	T	G	G	A	T	A	N	G	G	G	G	T	A	C	G	A	T	G	A	G	G	T	T	T	G	T	A	T	G	G	T	T	G	G
T	T	T	C	G	T	T	G	T	G	C	C	T	C	G	G	T	G	G	A	T	A	N	G	G	C	G	G	A	T	G	A	T	C	C	G	G	T	T	T	C	G	C	G	G	G	G	G	T	G
A	G	A	G	C	A	G	C	G	T	G	G	A	G	C	A	A	C	C	C	N	C	N	C	C	A	C	T	C	T	C	C	A	G	T	C	C	A	A	G	G	C	T	T	C	C	T	T	T	C
A	G	A	A	G	A	A	G	A	T	A	A	A	A	G	C	A	G	G	T	N	A	N	G	G	G	G	T	T	C	G	A	A	A	T	G	G	A	A	C	A	C	T	T	G	G	T	T	A	G
A	C	A	T	A	A	A	A	A	A	T	T	A	T	A	G	A	A	A	T	N	T	N	A	A	A	A	A	T	A	A	T	A	A	C	A	A	A	A	G	T	T	C	A	A	A	A	A	A	A
G	A	G	T	T	G	A	T	G	A	T	T	G	T	T	G	G	T	T	C	N	A	N	T	T	C	T	A	C	T	T	A	G	T	A	T	T	G	G	A	T	T	A	A	T	T	A	A	A	T
C	G	C	T	T	C	C	T	T	A	T	T	C	T	T	G	C	T	T	A	N	G	N	T	T	G	T	A	A	G	T	G	C	T	T	T	T	C	C	A	T	T	T	A	T	T	A	A	G	T
C	A	C	T	T	C	T	T	G	G	T	T	C	T	T	C	C	T	T	T	N	G	N	T	T	G	T	G	T	G	T	G	C	T	G	T	T	C	C	T	T	C	G	G	T	T	G	G	C	T
A	C	A	G	T	A	T	T	T	C	G	G	A	G	T	G	A	T	T	G	N	T	N	T	T	G	T	C	G	C	T	T	A	T	G	T	T	A	A	T	G	A	G	C	T	T	C	C	C	T
C	G	C	T	G	C	C	G	G	C	T	T	C	T	G	A	C	G	G	G	N	T	N	G	G	C	G	C	G	A	G	T	C	G	C	G	G	C	C	T	T	A	C	C	G	G	C	C	A	G
T	G	T	T	T	T	A	T	A	A	T	T	T	T	T	T	T	T	T	C	N	G	N	T	T	G	T	A	C	G	T	G	T	T	A	T	T	T	T	T	T	C	A	A	T	T	A	A	C	T
T	G	T	A	T	T	T	T	T	C	A	A	T	A	T	T	T	T	T	A	N	T	N	T	T	A	T	C	A	A	T	T	T	G	G	T	T	T	T	G	A	T	G	C	T	T	C	C	T	T
G	C	G	A	A	G	G	A	C	T	A	A	G	A	A	T	G	A	A	G	N	A	N	A	A	T	A	T	G	C	A	A	G	G	A	A	A	G	G	T	A	C	A	T	A	A	T	T	T	A
C	G	C	A	A	C	G	A	A	T	A	A	C	A	A	T	C	A	A	A	N	A	N	A	A	T	A	T	A	G	A	A	C	C	C	A	A	C	C	G	A	T	C	T	A	A	T	T	G	A
G	A	G	G	A	G	C	A	T	G	G	G	G	G	A	G	G	A	A	C	N	C	N	A	A	T	A	G	C	G	A	C	G	A	G	A	A	G	G	G	G	C	G	G	A	A	G	G	C	A
A	T	A	C	G	A	A	G	T	C	C	C	A	C	G	T	A	G	G	G	N	C	N	G	G	T	G	C	G	G	G	C	A	C	G	G	G	A	A	C	C	A	G	C	G	G	C	C	G	G
A	T	A	C	C	A	G	C	G	G	C	C	A	C	C	T	A	C	C	G	N	A	N	C	C	G	C	G	G	C	C	A	A	T	G	C	C	A	A	A	C	T	G	G	C	C	G	G	A	C
T	T	T	A	C	T	A	C	T	A	A	A	T	A	C	A	T	C	C	G	N	T	N	C	C	T	C	A	G	G	C	T	T	G	C	C	C	T	T	C	A	G	C	A	C	C	A	A	A	C
T	T	T	C	A	T	C	A	G	A	C	C	T	C	A	A	T	A	A	C	N	A	N	A	A	T	A	A	C	A	A	A	T	A	G	A	A	T	T	T	C	A	G	A	A	A	A	A	T	A
T	G	T	T	C	T	G	C	G	T	T	T	T	T	C	A	T	C	C	G	N	C	N	C	C	A	C	T	G	T	C	C	T	G	A	C	C	T	T	G	T	A	A	T	C	C	T	T	T	C
T	T	T	T	T	T	G	T	T	T	T	T	T	T	T	G	T	T	T	A	N	A	N	T	T	A	T	T	A	T	T	A	T	A	T	T	T	T	T	A	T	G	T	T	T	T	T	T	T	T
G	T	G	G	T	G	G	T	G	T	G	G	G	G	T	C	G	T	T	T	N	G	N	T	T	A	T	T	T	T	T	G	G	A	T	T	T	G	G	G	G	T	T	T	T	T	T	T	T	T
T	A	T	C	G	T	C	G	A	T	C	C	T	C	G	C	T	G	G	T	N	G	N	G	G	G	G	T	T	T	G	G	T	T	T	G	G	T	T	A	C	G	T	T	G	G	T	T	G	G
G	A	G	G	C	G	G	C	A	G	G	G	G	G	C	A	G	C	C	T	N	T	N	C	C	C	C	G	T	G	C	T	G	T	T	C	C	G	G	A	G	T	T	G	C	C	G	G	T	C
G	A	G	A	G	G	A	G	A	T	A	A	G	A	G	C	G	G	G	T	N	G	N	G	G	C	G	T	T	T	G	G	G	T	G	G	G	G	G	T	A	G	G	T	G	G	T	T	G	G
C	G	C	A	A	C	T	A	C	G	A	A	C	A	A	T	C	A	A	G	N	T	N	A	A	A	A	G	G	T	A	T	C	G	T	A	A	C	C	T	A	A	T	G	A	A	G	G	G	A
A	C	A	T	A	A	T	A	T	G	T	T	A	T	A	T	A	A	A	T	N	T	N	A	A	C	A	G	T	A	A	T	A	A	T	A	A	A	A	T	T	T	T	G	A	A	G	G	C	A
C	C	C	T	T	C	T	T	T	C	T	T	C	T	T	G	C	T	T	T	N	G	N	T	T	T	T	C	T	A	T	G	C	C	A	T	T	C	C	G	T	C	A	C	T	T	C	C	A	T
T	A	T	T	T	T	T	T	C	A	T	T	T	T	T	C	T	T	T	A	N	T	N	T	T	T	T	A	A	A	T	T	T	T	A	T	T	T	T	A	T	A	A	A	T	T	A	A	C	T
G	C	G	T	T	G	G	T	A	C	T	T	G	T	T	G	G	T	T	A	N	T	N	T	T	G	T	C	A	G	T	T	G	A	A	T	T	G	G	C	T	T	A	C	T	T	C	C	T	T
A	T	A	G	T	A	T	T	T	T	G	G	A	G	T	A	A	T	T	A	N	G	N	T	T	C	T	T	A	C	T	G	A	A	G	T	T	A	A	T	G	T	G	T	T	T	T	T	G	T
G	T	G	T	G	G	T	G	G	G	T	T	G	T	G	A	G	G	G	G	N	G	N	G	G	G	G	G	G	C	G	G	G	A	C	G	G	G	G	A	T	G	C	G	G	G	G	G	A	G
A	G	A	G	T	A	A	T	G	A	G	G	A	G	T	T	A	T	T	C	N	A	N	T	T	A	T	A	C	A	T	A	A	G	C	T	T	A	A	A	G	T	C	A	T	T	A	A	G	T
A	C	A	G	G	A	A	G	C	G	G	G	A	G	G	T	A	G	G	C	N	G	N	G	G	A	G	G	C	C	G	G	A	A	A	G	G	A	A	A	G	G	A	G	G	G	G	G	A	G
T	G	T	C	G	T	A	G	A	A	C	C	T	C	G	T	T	G	G	A	N	A	N	G	G	T	G	A	A	T	G	A	T	A	C	G	G	T	T	G	C	G	C	A	G	G	A	A	A	G
T	A	T	A	C	T	G	C	G	A	A	A	T	A	C	T	T	C	C	C	N	A	N	C	C	T	C	A	C	T	C	A	T	G	T	C	C	T	T	A	A	T	T	A	C	C	A	A	T	C
T	A	T	C	A	T	C	A	A	T	C	C	T	C	A	G	T	A	A	T	N	G	N	A	A	T	A	T	T	G	A	G	T	G	T	A	A	T	T	A	C	G	T	T	A	A	T	T	T	A
G	T	G	T	C	G	C	C	C	T	T	T	G	T	C	T	G	C	C	T	N	G	N	C	C	T	C	T	T	C	C	G	G	T	G	C	C	G	G	G	T	A	G	T	C	C	T	T	T	C
A	T	A	G	T	A	A	T	G	T	G	G	A	G	T	G	A	T	T	G	N	T	N	T	T	G	T	T	G	G	T	T	A	G	C	T	T	A	A	G	G	A	C	T	T	T	T	T	G	T
C	T	C	A	G	C	C	G	G	G	A	A	C	A	G	G	C	G	G	C	N	T	N	G	G	T	G	G	C	A	G	T	C	C	G	G	G	C	C	T	A	A	G	G	G	G	G	G	A	G
T	T	T	G	A	T	T	A	G	A	G	G	T	G	A	C	T	A	A	G	N	C	N	A	A	G	A	A	G	A	A	C	T	C	A	A	A	T	T	G	G	C	A	A	A	A	A	A	C	A
A	G	A	A	G	A	T	G	C	C	A	A	A	A	G	A	A	G	G	A	N	C	N	G	G	G	G	C	A	T	G	C	A	A	A	G	G	A	A	C	A	T	A	C	G	G	C	C	T	G
A	T	A	A	A	A	G	A	G	T	A	A	A	A	A	C	A	A	A	A	T	G	N	A	A	C	A	T	A	T	A	G	A	C	T	A	A	A	A	C	A	T	T	T	A	A	T	T	A	A
A	G	A	T	A	A	C	A	A	A	T	T	A	T	A	T	A	A	A	T	G	A	N	A	A	A	A	A	T	T	A	A	A	T	T	A	A	A	A	A	T	C	T	A	A	A	A	A	A	A
G	G	G	T	T	G	G	T	T	A	T	T	G	T	T	G	G	T	T	T	G	A	N	T	T	C	T	A	T	T	T	A	G	A	T	T	T	G	G	C	T	A	T	A	T	T	A	A	A	T
A	C	A	T	T	A	A	T	T	A	T	T	A	T	T	A	A	T	T	T	T	G	N	T	T	T	T	A	T	G	T	G	A	C	T	T	T	A	A	T	T	T	T	A	T	T	A	A	G	T
A	A	A	G	T	A	A	T	T	G	G	G	A	G	T	G	A	T	T	T	T	G	N	T	T	G	T	G	T	T	T	G	A	T	G	T	T	A	A	A	G	G	G	G	T	T	G	G	A	T
G	C	G	A	G	G	T	G	T	A	A	A	G	A	G	A	G	G	G	G	A	T	N	G	G	A	G	A	G	G	G	T	G	T	T	G	G	G	G	C	A	G	T	A	G	G	A	A	A	G
G	T	G	C	A	G	T	A	G	A	C	C	G	C	A	A	G	A	A	T	C	C	N	A	A	G	A	A	T	G	A	C	G	G	G	A	A	G	G	T	C	C	G	A	A	A	A	A	G	A
T	G	T	T	C	T	T	C	T	G	T	T	T	T	C	T	T	C	C	G	T	T	N	C	C	A	C	G	G	C	C	T	T	T	G	C	C	T	T	T	T	A	G	G	C	C	G	G	G	C
G	A	G	A	T	G	T	T	T	G	A	A	G	A	T	T	G	T	T	G	T	T	N	T	T	A	T	G	G	A	T	T	G	G	C	T	T	G	G	G	A	G	C	G	T	T	G	G	T	T
C	G	C	A	A	C	G	A	A	T	A	A	C	A	A	T	C	A	A	C	A	A	N	A	A	T	A	T	C	C	A	A	C	G	A	A	A	C	C	T	A	A	A	T	A	A	T	T	G	A
C	A	C	A	A	C	T	A	A	G	A	A	C	A	A	G	C	A	A	A	C	A	N	A	A	T	A	G	A	T	A	A	C	T	C	A	A	C	C	G	A	C	C	G	A	A	G	G	C	A
A	A	A	G	A	A	G	A	A	C	G	G	A	G	A	A	A	A	A	C	C	T	N	A	A	T	A	C	C	G	A	T	A	T	T	A	A	A	A	G	G	G	T	C	A	A	C	C	C	A
C	T	C	A	G	C	G	G	G	C	A	A	C	A	G	C	C	G	G	T	C	G	N	G	G	G	G	C	T	A	G	G	C	A	G	G	G	C	C	T	A	G	G	C	G	G	C	C	A	G
T	T	T	A	A	T	C	A	C	A	A	A	T	A	A	T	T	A	A	G	C	A	N	A	A	A	A	A	G	G	A	A	T	C	A	A	A	T	T	T	A	G	A	A	A	A	A	A	C	A
A	T	A	G	A	A	A	A	C	C	G	G	A	G	A	A	A	A	A	A	A	C	N	A	A	C	A	C	A	A	A	C	A	T	G	A	A	A	A	A	G	C	G	C	A	A	C	C	T	A
C	G	C	G	G	C	C	G	A	T	G	G	C	G	G	A	C	G	G	G	A	A	N	G	G	T	G	T	G	A	G	A	C	T	A	G	G	C	C	C	G	G	A	T	G	G	T	T	A	G
T	A	T	T	G	T	T	G	C	A	T	T	T	T	G	A	T	G	G	A	A	A	N	G	G	A	G	A	A	T	G	A	T	A	A	G	G	T	T	T	T	A	A	A	G	G	A	A	C	G
T	C	T	G	T	T	G	T	T	C	G	G	T	G	T	G	T	T	T	A	A	C	N	T	T	A	T	C	A	T	T	C	T	C	T	T	T	T	T	T	G	T	T	C	T	T	C	C	T	T
G	T	G	C	G	G	A	G	T	T	C	C	G	C	G	A	G	G	G	T	T	C	N	G	G	A	G	T	T	T	G	C	G	C	T	G	G	G	G	A	C	T	T	T	G	G	T	T	T	G
T	A	T	C	C	T	G	C	G	T	C	C	T	C	C	A	T	C	C	T	G	T	N	C	C	G	C	T	T	G	C	T	T	C	T	C	C	T	T	C	C	T	T	T	C	C	T	T	G	C
G	A	G	A	T	G	A	C	C	G	A	A	G	A	C	G	G	C	C	T	C	T	N	C	C	A	C	G	T	A	C	T	G	C	G	C	C	G	G	C	A	T	G	G	C	C	G	G	T	C
G	A	G	C	A	G	A	A	G	T	C	C	G	C	A	G	G	A	A	G	T	C	N	A	A	A	A	T	G	C	A	C	G	A	A	A	A	G	G	C	C	G	A	T	A	A	T	T	G	A
T	G	T	T	C	T	T	C	A	G	T	T	T	T	C	T	T	C	C	A	G	T	N	C	C	G	C	G	A	T	C	T	T	A	C	C	C	T	T	C	T	T	C	G	C	C	G	G	G	C
T	A	T	A	T	T	T	T	A	G	A	A	T	A	T	G	T	T	T	C	T	T	N	T	T	G	T	G	C	A	T	T	T	A	T	T	T	T	T	A	A	T	T	G	T	T	G	G	T	T
A	A	A	C	A	A	T	A	T	T	C	C	A	C	A	C	A	A	A	T	T	G	N	A	A	T	A	T	T	A	A	G	A	A	A	A	A	A	A	A	C	A	A	T	A	A	T	T	T	A
C	G	C	T	C	C	G	C	T	T	T	T	C	T	C	C	C	C	C	A	G	A	N	C	C	G	C	T	A	A	C	A	C	T	A	C	C	C	C	A	T	A	A	T	C	C	T	T	A	C
T	G	T	T	T	T	A	T	T	A	T	T	T	T	T	A	T	T	T	A	T	A	N	T	T	C	T	A	A	G	T	A	T	G	A	T	T	T	T	A	T	A	A	A	T	T	A	A	C	T
T	T	T	G	T	T	C	T	T	C	G	G	T	G	T	C	T	T	T	A	T	A	N	T	T	C	T	C	A	A	T	A	T	C	G	T	T	T	T	T	G	G	G	C	T	T	C	C	T	T
A	G	A	T	G	A	T	G	G	T	T	T	A	T	G	T	A	G	G	G	A	T	N	G	G	A	G	T	G	A	G	T	A	T	A	G	G	A	A	G	T	C	A	T	G	G	T	T	T	G
C	C	C	G	T	C	A	T	T	T	G	G	C	G	T	A	C	T	T	A	A	A	N	T	T	C	T	T	A	G	T	A	C	G	A	T	T	C	C	C	G	C	A	T	T	T	T	T	A	T
C	C	C	G	G	C	A	G	G	A	G	G	C	G	G	C	C	G	G	A	A	C	N	G	G	T	G	A	A	G	G	C	C	T	G	G	G	C	C	T	G	A	G	A	G	G	A	A	C	G
C	A	C	T	G	C	A	G	G	C	T	T	C	T	G	T	C	G	G	G	A	T	N	G	G	A	G	C	G	T	G	T	C	T	G	G	G	C	C	G	T	C	G	C	G	G	C	C	C	G
C	C	C	T	T	C	G	T	C	C	T	T	C	T	T	T	C	T	T	G	T	C	N	T	T	C	T	C	G	G	T	C	C	G	T	T	T	C	C	T	T	T	T	C	T	T	C	C	C	T
A	T	A	A	T	A	A	T	A	C	A	A	A	A	T	G	A	T	T	T	T	C	N	T	T	T	T	C	T	C	T	C	A	T	G	T	T	A	A	T	A	T	G	C	T	T	C	C	C	T
A	A	A	C	A	A	A	A	C	C	C	C	A	C	A	T	A	A	A	G	T	A	N	A	A	T	A	C	G	C	A	A	A	T	C	A	A	A	A	G	C	G	C	C	A	A	C	C	A	A
A	C	A	T	C	A	G	C	T	A	T	T	A	T	C	G	A	C	C	C	A	A	N	C	C	G	C	A	C	A	C	A	A	A	C	C	C	A	A	T	T	C	C	A	C	C	A	A	A	C
A	T	A	T	T	A	G	T	G	A	T	T	A	T	T	G	A	T	T	C	T	A	N	T	T	T	T	A	C	C	T	A	A	A	A	T	T	A	A	T	T	G	A	A	T	T	A	A	A	T
T	T	T	A	T	T	T	T	A	A	A	A	T	A	T	T	T	T	T	A	T	A	N	T	T	G	T	A	A	T	T	A	T	A	C	T	T	T	T	A	A	A	C	A	T	T	A	A	A	T
G	G	G	C	A	G	G	A	G	A	C	C	G	C	A	T	G	A	A	C	G	A	N	A	A	G	A	A	C	A	A	A	G	A	T	A	A	G	G	A	C	A	T	A	A	A	A	A	T	A
C	T	C	C	C	C	C	C	A	T	C	C	C	C	C	A	C	C	C	T	T	G	N	C	C	T	C	T	T	C	C	G	C	T	A	C	C	C	C	A	C	T	A	T	C	C	T	T	G	C
T	G	T	C	C	T	C	C	A	G	C	C	T	C	C	C	T	C	C	A	C	A	N	C	C	T	C	G	A	T	C	A	T	T	C	C	C	T	T	A	C	T	C	G	C	C	G	G	C	C
G	G	G	C	C	G	A	C	T	C	C	C	G	C	C	T	G	C	C	C	C	G	N	C	C	A	C	C	C	T	C	G	G	T	T	C	C	G	G	T	C	T	T	C	C	C	C	C	T	C
T	T	T	A	C	T	C	C	T	T	A	A	T	A	C	T	T	C	C	T	A	A	N	C	C	C	C	T	T	G	C	A	T	A	T	C	C	T	T	T	A	T	T	T	C	C	T	T	G	C
T	T	T	A	A	T	T	A	T	G	A	A	T	A	A	A	T	A	A	T	G	A	N	A	A	T	A	G	T	T	A	A	T	T	G	A	A	T	T	T	A	G	G	G	A	A	G	G	T	A
G	A	G	A	A	G	A	A	G	T	A	A	G	A	A	C	G	A	A	G	C	A	N	A	A	T	A	T	G	G	A	A	G	T	T	A	A	G	G	A	A	T	T	T	A	A	T	T	T	A
T	C	T	A	A	T	C	A	A	T	A	A	T	A	A	C	T	A	A	T	A	G	N	A	A	A	A	T	T	G	A	G	T	G	G	A	A	T	T	T	A	G	G	T	A	A	T	T	G	A
T	T	T	T	A	T	T	A	C	G	T	T	T	T	A	C	T	A	A	G	T	T	N	A	A	C	A	G	G	T	A	T	T	T	G	A	A	T	T	T	T	G	G	G	A	A	G	G	T	A
A	T	A	G	T	A	T	T	T	T	G	G	A	G	T	C	A	T	T	G	G	C	N	T	T	C	T	T	G	T	T	C	A	C	T	T	T	A	A	G	G	C	T	T	T	T	T	T	T	T
A	A	A	C	G	A	G	G	A	T	C	C	A	C	G	A	A	G	G	T	T	A	N	G	G	C	G	T	T	A	G	A	A	C	T	G	G	A	A	T	C	A	T	T	G	G	T	T	A	G
A	C	A	T	C	A	T	C	A	A	T	T	A	T	C	A	A	C	C	T	C	A	N	C	C	C	C	A	T	C	C	A	A	A	A	C	C	A	A	C	T	C	A	A	C	C	A	A	A	C
A	C	A	G	T	A	G	T	A	A	G	G	A	G	T	A	A	T	T	A	A	C	N	T	T	A	T	A	A	T	T	C	A	G	C	T	T	A	A	C	G	T	C	A	T	T	A	A	A	T
T	C	T	T	G	T	G	G	G	A	T	T	T	T	G	A	T	G	G	C	C	A	N	G	G	A	G	A	C	T	G	A	T	C	T	G	G	T	T	A	T	G	T	A	G	G	A	A	A	G
T	C	T	T	T	T	T	T	A	A	T	T	T	T	T	T	T	T	T	T	A	T	N	T	T	A	T	A	T	A	T	T	T	A	T	T	T	T	T	G	T	A	T	A	T	T	A	A	T	T
T	A	T	G	T	T	T	T	A	T	G	G	T	G	T	G	T	T	T	T	A	C	N	T	T	A	T	T	T	C	T	C	T	T	A	T	T	T	T	C	G	G	A	T	T	T	T	T	T	T
A	A	A	T	G	A	A	G	G	T	T	T	A	T	G	C	A	G	G	A	T	A	N	G	G	T	G	T	A	C	G	A	A	G	C	G	G	A	A	A	T	A	C	T	G	G	T	T	T	G
T	A	T	T	T	T	C	T	G	T	T	T	T	T	T	T	T	T	T	C	T	A	N	T	T	G	T	T	C	C	T	A	T	T	C	T	T	T	T	T	T	A	C	T	T	T	T	T	A	T
T	A	T	A	T	T	T	T	T	A	A	A	T	A	T	G	T	T	T	C	C	T	N	T	T	C	T	A	C	C	T	T	T	C	C	T	T	T	T	G	A	T	C	A	T	T	A	A	T	T
G	T	G	A	A	G	T	A	G	T	A	A	G	A	A	T	G	A	A	C	A	A	N	A	A	T	A	T	C	A	A	A	G	A	C	A	A	G	G	T	A	T	C	T	A	A	T	T	T	A
T	G	T	A	A	T	A	A	C	T	A	A	T	A	A	T	T	A	A	C	G	T	N	A	A	G	A	T	C	A	A	T	T	C	A	A	A	T	T	C	A	T	A	T	A	A	T	T	G	A
C	C	C	A	A	C	C	A	C	G	A	A	C	A	A	G	C	A	A	A	A	T	N	A	A	T	A	G	A	A	A	T	C	A	A	A	A	C	C	A	A	G	A	G	A	A	G	G	T	A
C	T	C	T	A	C	C	A	A	T	T	T	C	T	A	T	C	A	A	A	A	G	N	A	A	T	A	T	A	A	A	G	C	A	A	A	A	C	C	C	T	A	A	T	A	A	T	T	C	A
A	G	A	T	T	A	C	T	C	C	T	T	A	T	T	T	A	T	T	A	G	T	N	T	T	G	T	C	A	T	T	T	A	T	A	T	T	A	A	A	T	C	A	C	T	T	C	C	C	T
G	T	G	T	T	G	C	T	T	C	T	T	G	T	T	A	G	T	T	A	T	T	N	T	T	T	T	C	A	G	T	T	G	T	T	T	T	G	G	A	T	T	T	C	T	T	C	C	A	T
C	T	C	A	T	C	A	T	A	A	A	A	C	A	T	A	C	T	T	T	A	G	N	T	T	T	T	A	T	C	T	G	C	C	G	T	T	C	C	T	A	A	G	A	T	T	A	A	G	T
A	G	A	T	A	A	A	A	C	G	T	T	A	T	A	A	A	A	A	G	G	G	N	A	A	A	A	G	G	T	A	G	A	A	C	A	A	A	A	T	T	A	C	G	A	A	G	G	C	A
T	T	T	T	T	T	A	T	T	C	T	T	T	T	T	A	T	T	T	C	G	T	N	T	T	A	T	C	C	G	T	T	T	G	T	T	T	T	T	C	T	A	T	C	T	T	C	C	A	T
G	T	G	G	T	G	A	T	T	A	G	G	G	G	T	T	G	T	T	T	A	G	N	T	T	A	T	A	T	T	T	G	G	A	G	T	T	G	G	A	G	G	G	A	T	T	A	A	T	T
T	A	T	T	G	T	T	G	G	T	T	T	T	T	G	T	T	G	G	G	C	A	N	G	G	A	G	T	G	T	G	A	T	A	T	G	G	T	T	G	T	A	T	T	G	G	T	T	G	G
C	A	C	C	T	C	G	T	T	G	C	C	C	C	T	T	C	T	T	T	C	C	N	T	T	T	T	G	T	G	T	C	C	G	T	T	T	C	C	A	C	A	T	G	T	T	G	G	T	T
A	A	A	C	C	A	C	C	G	T	C	C	A	C	C	A	A	C	C	T	T	T	N	C	C	T	C	T	T	T	C	T	A	T	G	C	C	A	A	A	C	G	G	T	C	C	T	T	C	C
C	A	C	A	C	C	T	C	G	C	A	A	C	A	C	T	C	C	C	G	G	T	N	C	C	T	C	C	G	T	C	T	C	A	T	C	C	C	C	G	A	G	T	C	C	C	C	C	A	C
A	T	A	G	A	A	G	A	T	A	G	G	A	G	A	T	A	A	A	T	A	T	N	A	A	A	A	A	T	A	A	T	A	G	T	A	A	A	A	T	G	T	T	A	A	A	A	A	C	A
A	T	A	C	G	A	T	G	T	C	C	C	A	C	G	G	A	G	G	T	G	A	N	G	G	T	G	C	T	A	G	A	A	G	A	G	G	A	A	A	C	G	A	C	G	G	C	C	A	G
T	T	T	A	C	T	T	C	A	A	A	A	T	A	N	T	T	C	C	A	C	A	N	C	C	T	C	A	A	A	C	A	T	A	A	C	C	T	T	G	A	C	A	A	C	C	A	A	A	C
T	A	T	T	A	T	G	A	C	A	T	T	T	T	A	C	T	A	A	A	A	A	N	A	A	G	A	A	A	A	A	A	T	C	A	A	A	T	T	G	T	C	A	A	A	A	A	A	T	A
C	T	C	G	T	C	T	T	T	T	G	G	C	G	T	C	C	T	T	A	T	C	N	T	T	T	T	T	A	T	T	C	C	C	A	T	T	C	C	A	G	A	A	T	T	T	T	T	T	T
A	T	A	T	G	A	T	G	T	T	T	T	A	T	G	A	A	G	G	A	A	T	N	G	G	C	G	T	A	T	G	T	A	T	T	G	G	A	A	C	T	C	T	T	G	G	T	T	C	G
G	G	G	C	T	G	A	T	A	C	C	C	G	C	T	G	G	T	T	T	G	T	N	T	T	C	T	C	T	T	T	T	G	G	T	T	T	G	G	C	C	T	T	C	T	T	C	C	A	T
A	T	A	A	C	A	A	C	C	A	A	A	A	A	C	C	A	C	C	T	T	A	N	C	C	A	C	A	T	A	C	A	A	A	T	C	C	A	A	T	A	A	T	A	C	C	A	A	G	C
A	C	A	C	A	A	A	A	C	G	C	C	A	C	A	A	A	A	A	T	C	A	N	A	A	G	A	G	T	T	A	A	A	G	A	A	A	A	A	G	C	C	A	G	A	A	G	G	A	A
G	C	G	A	C	G	A	C	C	A	A	A	G	A	C	T	G	C	C	A	T	T	N	C	C	C	C	A	A	T	C	T	G	C	T	C	C	G	G	A	A	T	T	A	C	C	A	A	A	C
T	A	T	A	A	T	T	A	C	A	A	A	T	A	A	G	T	A	A	T	T	G	N	A	A	A	A	A	T	G	A	G	T	A	T	A	A	T	T	G	A	T	T	A	A	A	A	A	G	A
A	G	A	T	A	A	T	A	A	G	T	T	A	T	A	T	A	A	A	T	G	A	N	A	A	T	A	G	T	T	A	A	A	T	G	A	A	A	A	C	T	G	G	G	A	A	G	G	T	A
G	C	G	T	T	G	T	T	A	T	T	T	G	T	T	C	G	T	T	G	C	A	N	T	T	G	T	T	G	C	T	A	G	A	T	T	T	G	G	A	T	T	T	T	T	T	T	T	A	T
G	A	G	C	T	G	A	T	A	A	C	C	G	C	T	A	G	T	T	T	C	G	N	T	T	T	T	A	T	C	T	G	G	G	C	T	T	G	G	T	C	G	C	A	T	T	A	A	G	T
A	T	A	A	C	A	T	C	A	G	A	A	A	A	C	C	A	C	C	C	G	A	N	C	C	C	C	G	C	A	C	A	A	T	C	C	C	A	A	A	A	G	C	G	C	C	G	G	G	C
C	G	C	G	A	C	T	A	T	G	G	G	C	G	A	A	C	A	A	C	A	G	N	A	A	A	A	G	C	G	A	G	C	C	A	A	A	C	C	G	G	T	A	G	A	A	G	G	A	A
C	T	C	A	G	C	G	G	G	A	A	A	C	A	G	A	C	G	G	A	A	A	N	G	G	C	G	A	A	C	G	A	C	T	G	G	G	C	C	T	A	T	G	A	G	G	A	A	C	G
T	C	T	A	A	T	T	A	C	C	A	A	T	A	A	T	T	A	A	G	T	T	N	A	A	A	A	C	G	A	A	T	T	T	C	A	A	T	T	C	A	A	C	C	A	A	C	C	C	A
G	A	G	G	A	G	C	A	T	C	G	G	G	G	A	T	G	A	A	C	A	C	N	A	A	A	A	C	C	T	A	C	G	G	A	A	A	G	G	T	G	C	A	C	A	A	C	C	T	A
A	C	A	T	G	A	C	G	G	T	T	T	A	T	G	C	A	G	G	A	C	G	N	G	G	T	G	T	A	G	G	G	A	C	T	G	G	A	A	T	T	T	T	T	G	G	T	T	G	G
G	A	G	A	T	G	A	T	T	G	A	A	G	A	T	A	G	T	T	T	C	C	N	T	T	T	T	G	T	T	T	C	G	C	G	T	T	G	G	G	A	T	G	G	T	T	G	G	A	T
C	A	C	G	A	C	G	A	T	A	G	G	C	G	A	G	C	A	A	G	A	C	N	A	A	C	A	A	G	C	A	C	C	G	T	A	A	C	C	C	G	A	T	A	A	A	A	A	G	A
A	T	A	G	G	A	C	G	G	G	G	G	A	G	G	A	A	G	G	T	T	A	N	G	G	A	G	G	T	A	G	A	A	A	C	G	G	A	A	C	G	C	C	G	G	G	G	G	C	G
T	T	T	A	G	T	A	G	T	C	A	A	T	A	G	A	T	G	G	C	A	T	N	G	G	G	G	C	C	C	G	T	T	A	A	G	G	T	T	G	A	C	A	C	G	G	C	C	A	G
A	C	A	C	A	A	T	A	T	A	C	C	A	C	A	G	A	A	A	A	A	T	N	A	A	A	A	A	A	A	A	T	A	T	C	A	A	A	A	A	C	C	C	A	A	A	A	A	T	A
G	A	G	C	C	G	G	C	A	T	C	C	G	C	C	T	G	C	C	C	T	A	N	C	C	A	C	T	C	A	C	A	G	A	A	C	C	G	G	A	C	C	A	T	C	C	T	T	A	C
T	G	T	T	C	T	T	C	A	A	T	T	T	T	C	A	T	C	C	A	G	T	N	C	C	G	C	A	A	T	C	T	T	C	A	C	C	T	T	T	T	A	A	A	C	C	A	A	G	C
C	A	C	G	T	C	C	T	A	G	G	G	C	G	T	G	C	T	T	A	A	T	N	T	T	T	T	G	A	T	T	T	C	C	T	T	T	C	C	A	G	A	T	G	T	T	G	G	T	T
T	A	T	A	G	T	A	G	A	T	A	A	T	A	G	G	T	G	G	T	A	T	N	G	G	A	G	T	T	C	G	T	T	A	T	G	G	T	T	C	A	A	T	T	G	G	T	T	C	G
T	G	T	G	A	T	C	A	T	C	G	G	T	G	A	A	T	A	A	T	T	T	N	A	A	G	A	C	T	A	A	T	T	T	C	A	A	T	T	C	G	A	C	C	A	A	C	C	T	A
G	T	G	C	G	G	A	G	T	T	C	C	G	C	G	C	G	G	G	C	C	G	N	G	G	G	G	T	C	G	G	G	G	A	A	G	G	G	G	A	C	T	A	T	G	G	T	T	T	G
C	A	C	A	C	C	A	C	T	T	A	A	C	A	C	C	C	C	C	A	T	G	N	C	C	A	C	T	A	A	C	G	C	A	G	C	C	C	C	T	A	G	G	T	C	C	T	T	G	C
C	G	C	T	A	C	T	A	A	G	T	T	C	T	A	T	C	A	A	G	G	C	N	A	A	C	A	G	G	A	A	C	C	T	A	A	A	C	C	A	T	C	A	G	A	A	G	G	C	A
G	G	G	A	T	G	T	T	T	C	A	A	G	A	T	G	G	T	T	A	G	A	N	T	T	C	T	C	A	G	T	A	G	G	A	T	T	G	G	A	A	T	A	C	T	T	C	C	C	T
A	A	A	G	A	A	C	A	T	C	G	G	A	G	A	A	A	A	A	A	C	T	N	A	A	T	A	C	A	T	A	T	A	A	G	A	A	A	A	T	G	G	G	C	A	A	C	C	G	A
A	C	A	T	G	A	A	G	G	G	T	T	A	T	G	G	A	G	G	G	T	C	N	G	G	G	G	G	G	A	G	N	A	A	T	G	G	A	A	G	T	T	T	G	G	G	G	G	A	G
T	C	T	C	T	T	G	T	T	A	C	C	T	C	T	C	T	T	T	T	T	T	N	T	T	A	T	A	T	G	T	T	T	T	A	T	T	T	T	A	C	T	A	A	T	T	A	A	A	T
A	T	A	T	C	A	A	C	C	A	T	T	A	T	C	A	A	C	C	A	G	T	N	C	C	G	C	A	A	G	C	T	A	C	G	C	C	A	A	A	T	G	G	A	C	C	A	A	T	C
C	G	C	T	T	C	A	T	C	T	T	T	C	T	T	T	C	T	T	G	A	T	N	T	T	C	T	T	G	A	T	T	C	T	G	T	T	C	C	T	T	T	G	T	T	T	T	T	A	T
C	A	C	G	T	C	G	T	A	A	G	G	C	G	T	A	C	T	T	G	A	T	N	T	T	A	T	A	G	C	T	T	C	G	A	T	T	C	C	C	G	T	A	A	T	T	A	A	C	T
A	G	A	C	G	A	T	G	G	C	C	C	A	C	G	G	A	G	G	A	A	T	N	G	G	T	G	C	A	C	G	T	A	G	C	G	G	A	A	T	C	A	C	C	G	G	C	C	C	G
T	C	T	C	C	T	A	C	C	C	C	C	T	C	C	T	T	C	C	C	A	C	N	C	C	A	C	C	C	T	C	C	T	C	C	C	C	T	T	G	C	A	C	C	C	C	C	C	A	C
A	A	A	G	C	A	G	C	A	A	G	G	A	G	C	C	A	C	C	C	C	T	N	C	C	G	C	A	C	G	C	T	A	T	T	C	C	A	A	G	G	A	T	A	C	C	A	A	T	C
A	T	A	A	G	A	G	G	T	T	A	A	A	A	G	T	A	G	G	T	C	G	N	G	G	T	G	T	T	A	G	G	A	T	G	G	G	A	A	C	A	A	G	T	G	G	T	T	A	G
T	A	T	A	A	T	A	A	G	A	A	A	T	A	A	T	T	A	A	G	A	C	N	A	A	C	A	A	G	G	A	C	T	G	A	A	A	T	T	T	A	T	A	A	A	A	A	A	A	A
G	G	G	T	A	G	C	A	T	A	T	T	G	T	A	G	G	A	A	A	T	T	N	A	A	T	A	A	A	C	A	T	G	A	G	A	A	G	G	T	T	T	G	A	A	A	A	A	T	A
A	T	A	A	T	A	C	T	C	T	A	A	A	A	T	C	A	T	T	G	T	T	N	T	T	T	T	T	G	A	T	T	A	A	C	T	T	A	A	G	A	T	C	T	T	T	T	T	G	T
A	C	A	C	A	A	T	A	A	G	C	C	A	C	A	C	A	A	A	C	C	C	N	A	A	G	A	G	C	T	A	C	A	A	A	A	A	A	A	A	C	A	A	G	A	A	G	G	A	A
T	T	T	C	C	T	G	C	C	A	C	C	T	C	C	G	T	C	C	A	T	C	N	C	C	C	C	A	A	A	C	C	T	A	T	C	C	T	T	A	C	T	T	A	C	C	A	A	A	C
C	T	C	A	C	C	A	C	A	A	A	A	C	A	C	A	C	C	C	T	T	A	N	C	C	C	C	A	T	G	C	A	C	C	A	C	C	C	C	A	A	T	A	A	C	C	A	A	T	C
T	G	T	T	A	T	G	A	A	T	T	T	T	T	A	A	T	A	A	A	C	C	N	A	A	G	A	T	A	T	A	C	T	C	G	A	A	T	T	A	T	G	G	T	A	A	T	T	C	A
G	C	G	A	T	G	C	T	T	C	A	A	G	A	T	T	G	T	T	G	G	A	N	T	T	A	T	C	G	C	T	A	G	A	T	T	T	G	G	C	A	T	T	C	T	T	C	C	T	T
G	C	G	A	A	G	A	A	T	T	A	A	G	A	A	A	G	A	A	T	T	A	N	A	A	A	A	T	T	T	A	A	G	T	C	A	A	G	G	C	A	C	C	T	A	A	T	T	G	A
C	G	C	T	A	C	T	A	C	G	T	T	C	T	A	C	C	A	A	C	A	G	N	A	A	T	A	G	C	T	A	G	C	T	T	A	A	C	C	A	T	C	T	G	A	A	G	G	G	A
T	A	T	G	T	T	A	T	A	G	G	G	T	G	T	C	T	T	T	T	A	T	N	T	T	A	T	G	T	G	T	T	T	C	T	T	T	T	T	T	G	A	T	G	T	T	G	G	C	T
T	A	T	A	G	T	G	G	G	C	A	A	T	A	G	A	T	G	G	T	G	G	N	G	G	C	G	C	T	C	G	G	T	T	G	G	G	T	T	T	A	G	G	C	G	G	C	C	T	G
G	T	G	A	A	G	T	A	A	T	A	A	G	A	A	T	G	A	A	G	G	C	N	A	A	C	A	T	G	C	A	C	G	T	C	A	A	G	G	C	A	C	C	T	A	A	T	T	T	A
A	A	A	T	A	A	C	A	A	T	T	T	A	T	A	A	A	A	A	C	G	T	N	A	A	A	A	T	C	G	A	T	A	C	C	A	A	A	A	T	T	A	C	T	A	A	T	T	G	A
A	C	A	C	T	A	T	T	G	G	C	C	A	C	T	A	A	T	T	C	T	T	N	T	T	T	T	G	C	A	T	T	A	G	G	T	T	A	A	T	C	T	G	G	T	T	G	G	A	T
A	C	A	T	C	A	T	C	T	A	T	T	A	T	C	T	A	C	C	G	G	T	N	C	C	A	C	A	G	A	C	T	A	T	A	C	C	A	A	C	T	G	A	A	C	C	A	A	A	C
A	A	A	G	T	A	G	T	A	A	G	G	A	G	T	G	A	T	T	A	G	T	N	T	T	A	T	A	A	T	T	T	A	A	A	T	T	A	A	G	G	T	A	A	T	T	A	A	A	T
C	T	C	G	G	C	C	G	G	A	G	G	C	G	G	A	C	G	G	A	T	G	N	G	G	T	G	A	A	A	G	G	C	A	T	G	G	C	C	T	G	C	T	A	G	G	A	A	A	G
C	A	C	C	G	C	C	G	G	A	C	C	C	C	G	A	C	G	G	T	C	T	N	G	G	G	G	A	T	C	G	T	C	G	A	G	G	C	C	A	C	A	A	A	G	G	A	A	C	G
A	A	A	T	C	A	G	C	A	C	T	T	A	T	C	T	A	C	C	A	G	G	N	C	C	A	C	C	A	C	C	G	A	G	C	C	C	A	A	A	T	C	C	C	C	C	C	C	C	C
T	T	T	T	T	T	A	T	C	C	T	T	T	T	T	C	T	T	T	C	C	G	N	T	T	A	T	C	C	A	T	G	T	G	C	T	T	T	T	G	T	A	C	C	T	T	C	C	A	T
T	G	T	G	T	T	A	T	C	A	G	G	T	G	T	T	T	T	T	C	A	A	N	T	T	T	T	A	C	T	T	A	T	T	A	T	T	T	T	G	G	A	A	A	T	T	A	A	T	T
C	A	C	A	G	C	T	G	T	T	A	A	C	A	G	G	C	G	G	A	C	A	N	G	G	C	G	T	A	A	G	A	C	G	T	G	G	C	C	G	A	T	T	T	G	G	T	T	T	G
T	A	T	A	A	T	A	A	G	T	A	A	T	A	A	G	T	A	A	T	T	A	N	A	A	T	A	T	T	A	A	A	T	G	A	A	A	T	T	T	A	T	A	T	A	A	T	T	C	A
T	T	T	A	A	T	C	A	A	C	A	A	T	A	A	C	T	A	A	A	A	C	N	A	A	G	A	C	A	T	A	C	T	T	A	A	A	T	T	G	A	C	A	C	A	A	C	C	T	A
C	C	C	A	A	C	C	A	G	T	A	A	C	A	A	T	C	A	A	A	T	T	N	A	A	G	A	T	A	G	A	T	C	C	T	A	A	C	C	G	A	A	T	T	A	A	T	T	T	A
G	T	G	C	A	G	A	A	C	T	C	C	G	C	A	T	G	A	A	T	T	G	N	A	A	C	A	T	T	A	A	G	G	G	G	A	A	G	G	T	C	G	G	T	A	A	T	T	C	A
T	G	T	C	C	T	T	C	A	C	C	C	T	C	C	G	T	C	C	G	G	T	N	C	C	T	C	C	G	A	C	T	T	C	A	C	C	T	T	C	C	A	A	C	C	C	C	C	G	C
A	G	A	A	C	A	A	C	T	G	A	A	A	A	C	A	A	C	C	A	C	G	N	C	C	T	C	G	A	T	C	G	A	A	A	C	C	A	A	G	A	A	A	G	C	C	G	G	T	C
A	C	A	T	A	A	A	A	A	T	T	T	A	T	A	A	A	A	A	A	C	A	N	A	A	G	A	T	A	C	A	A	A	C	T	A	A	A	A	C	T	G	T	T	A	A	T	T	A	A
G	T	G	T	T	G	T	T	G	A	T	T	G	T	T	A	G	T	T	T	T	A	N	T	T	A	T	A	T	T	T	A	G	T	C	T	T	G	G	A	T	T	C	A	T	T	A	A	A	T
G	T	G	C	T	G	G	T	T	A	C	C	G	C	T	A	G	T	T	C	T	A	N	T	T	A	T	A	C	G	T	A	G	A	T	T	T	G	G	C	C	A	T	A	T	T	A	A	G	T
G	G	G	T	C	G	A	C	C	G	T	T	G	T	C	C	G	C	C	T	T	G	N	C	C	A	C	G	T	G	C	G	G	T	G	C	C	G	G	T	T	G	G	G	C	C	G	G	G	C
T	A	T	T	T	T	A	T	T	G	T	T	T	T	T	C	T	T	T	G	G	G	N	T	T	A	T	G	G	C	T	G	T	T	G	T	T	T	T	A	T	G	G	G	T	T	G	G	G	T
G	A	G	C	T	G	T	T	T	G	C	C	G	C	T	A	G	T	T	G	G	T	N	T	T	C	T	G	G	T	T	T	G	G	C	T	T	G	G	T	C	A	C	G	T	T	G	G	T	T
G	A	G	G	C	G	C	C	G	T	G	G	G	G	C	T	G	C	C	C	A	T	N	C	C	C	C	T	C	T	C	T	G	C	T	C	C	G	G	T	G	C	T	T	C	C	T	T	G	C
T	A	T	T	G	T	T	G	C	G	T	T	T	T	G	T	T	G	G	T	G	T	N	G	G	A	G	G	T	G	G	T	T	C	T	G	G	T	T	G	T	C	T	G	G	G	G	G	G	G
C	C	C	A	T	C	G	T	C	G	A	A	C	A	T	C	C	T	T	T	G	G	N	T	T	T	T	G	T	A	T	G	C	T	G	T	T	C	C	C	A	T	G	G	T	T	G	G	T	T
G	C	G	A	A	G	G	A	G	T	A	A	G	A	A	T	G	A	A	G	C	G	N	A	A	T	A	T	G	A	A	G	G	T	A	A	A	G	G	C	A	G	A	T	A	A	T	T	C	A
C	A	C	G	A	C	C	A	A	C	G	G	C	G	A	T	C	A	A	A	T	A	N	A	A	C	A	C	A	A	A	A	C	T	A	A	A	C	C	T	G	A	A	C	A	A	C	C	G	A
A	T	A	G	G	A	T	G	A	G	G	G	A	G	G	C	A	G	G	A	G	T	N	G	G	T	G	G	A	A	G	T	A	G	A	G	G	A	A	T	G	G	A	G	G	G	G	G	C	G
C	T	C	G	G	C	T	G	T	C	G	G	C	G	G	G	C	G	G	A	T	T	N	G	G	T	G	C	A	C	G	T	C	G	A	G	G	C	C	T	G	C	A	C	G	G	C	C	A	G
T	C	T	T	G	T	G	G	A	A	T	T	T	T	G	T	T	G	G	A	G	A	N	G	G	C	G	A	A	C	G	A	T	A	C	G	G	T	T	G	T	A	C	A	G	G	A	A	C	G
A	T	A	G	T	A	A	T	C	C	G	G	A	G	T	A	A	T	T	C	T	T	N	T	T	G	T	C	C	A	T	T	A	G	C	T	T	A	A	G	G	T	C	C	T	T	C	C	T	T
T	T	T	G	G	T	A	G	C	T	G	G	T	G	G	A	T	G	G	C	G	A	N	G	G	T	G	T	C	T	G	A	T	G	A	G	G	T	T	A	G	A	A	T	G	G	T	T	A	G
T	C	T	T	G	T	A	G	A	A	T	T	T	T	G	G	T	G	G	A	T	A	N	G	G	A	G	A	A	T	G	A	T	C	T	G	G	T	T	G	T	G	T	A	G	G	A	A	T	G
G	G	G	C	T	G	A	T	T	T	C	C	G	C	T	G	G	T	T	T	T	A	N	T	T	A	T	T	T	C	T	A	G	T	T	T	T	G	G	G	C	T	T	T	T	T	T	T	T	T
C	T	C	G	C	C	C	C	A	T	G	G	C	G	C	G	C	C	C	T	C	G	N	C	C	G	C	T	T	T	C	G	C	G	C	C	C	C	C	C	G	C	C	T	C	C	T	T	G	C
C	A	C	C	G	C	C	G	A	G	C	C	C	C	G	T	C	G	G	C	T	C	N	G	G	G	G	G	C	T	G	C	C	T	T	G	G	C	C	T	C	T	T	G	G	G	G	G	C	G
T	A	T	A	C	T	A	C	T	C	A	A	T	A	C	G	T	C	C	T	C	A	N	C	C	G	C	C	T	C	C	A	T	G	T	C	C	T	T	G	A	T	T	C	C	C	C	C	C	C
T	G	T	C	A	T	T	A	G	C	C	C	T	C	A	G	T	A	A	T	T	T	N	A	A	T	A	C	T	G	A	T	T	T	C	A	A	T	T	T	C	G	C	C	A	A	C	C	T	A
T	G	T	T	C	T	T	C	A	T	T	T	T	T	C	T	T	C	C	C	T	T	N	C	C	G	C	T	C	T	C	T	T	G	G	C	C	T	T	G	T	C	G	T	C	C	T	T	T	C
G	G	G	A	T	G	C	T	A	T	A	A	G	A	T	C	G	T	T	G	A	C	N	T	T	G	T	T	G	A	T	C	G	T	T	T	T	G	G	T	A	C	T	T	T	T	T	T	T	T
G	T	G	T	A	G	T	A	T	T	T	T	G	T	A	G	G	A	A	T	T	A	N	A	A	T	A	T	T	A	A	A	G	T	A	A	A	G	G	G	T	G	A	T	A	A	T	T	G	A
A	G	A	T	T	A	T	T	C	G	T	T	A	T	T	C	A	T	T	A	G	A	N	T	T	C	T	G	A	G	T	A	A	C	A	T	T	A	A	T	T	A	A	G	T	T	G	G	G	T
G	G	G	G	T	G	C	T	T	G	G	G	G	G	T	A	G	T	T	A	T	A	N	T	T	G	T	G	A	G	T	A	G	T	G	T	T	G	G	T	G	A	G	G	T	T	G	G	A	T
G	T	G	C	G	G	G	G	G	A	C	C	G	C	G	C	G	G	G	G	T	C	N	G	G	C	G	A	G	G	G	C	G	C	G	G	G	G	G	C	C	T	G	A	G	G	A	A	G	G
C	C	C	C	C	C	T	C	G	G	C	C	C	C	C	T	C	C	C	G	G	A	N	C	C	A	C	G	G	T	C	A	C	T	G	C	C	C	C	T	C	A	G	G	C	C	G	G	G	C
T	G	T	T	C	T	A	C	C	G	T	T	T	T	C	A	T	C	C	G	G	A	N	C	C	C	C	G	G	G	C	A	T	T	T	C	C	T	T	C	T	C	T	G	C	C	G	G	C	C
G	C	G	T	T	G	A	T	T	C	T	T	G	T	T	T	G	T	T	T	T	A	N	T	T	T	T	C	T	G	T	A	G	A	G	T	T	G	G	T	T	C	G	C	T	T	C	C	T	T
T	A	T	T	T	T	G	T	T	T	T	T	T	T	T	T	T	T	T	G	T	T	N	T	T	A	T	T	G	T	T	T	T	T	G	T	T	T	T	T	T	A	G	T	T	T	T	T	G	T
G	C	G	G	T	G	G	T	G	G	G	G	G	G	T	G	G	T	T	G	G	T	N	T	T	T	T	G	G	C	T	T	G	G	T	T	T	G	G	A	G	T	T	G	T	T	G	G	T	T
T	T	T	G	G	T	G	G	A	T	G	G	T	G	G	C	T	G	G	T	C	G	N	G	G	T	G	T	T	G	G	G	T	T	C	G	G	T	T	T	G	A	C	T	G	G	T	T	G	G
G	A	G	A	G	G	T	G	A	G	A	A	G	A	G	C	G	G	G	C	C	T	N	G	G	G	G	G	C	C	G	T	G	T	G	G	G	G	G	G	A	A	G	G	G	G	G	G	T	G
T	T	T	G	A	T	G	A	A	T	G	G	T	G	A	T	T	A	A	G	A	T	N	A	A	C	A	T	G	A	A	T	T	G	C	A	A	T	T	T	G	T	C	T	A	A	T	T	G	A
T	T	T	G	G	T	G	G	A	G	G	G	T	G	G	T	T	G	G	C	T	G	N	G	G	C	G	G	C	C	G	G	T	G	A	G	G	T	T	T	G	G	A	G	G	G	G	G	T	G
C	G	C	C	G	C	T	G	C	T	C	C	C	C	G	T	C	G	G	A	A	A	N	G	G	T	G	T	A	T	G	A	C	T	C	G	G	C	C	G	C	A	C	T	G	G	T	T	T	G
T	C	T	T	C	T	C	C	C	T	T	T	T	T	C	G	T	C	C	C	A	A	N	C	C	T	C	T	C	A	C	A	T	T	T	C	C	T	T	G	T	A	T	T	C	C	T	T	C	C
C	C	C	G	T	C	G	T	A	C	G	G	C	G	T	G	C	T	T	T	C	T	N	T	T	T	T	C	T	T	T	T	C	G	A	T	T	C	C	T	G	T	A	C	T	T	C	C	T	T
T	T	T	T	G	T	C	G	T	T	T	T	T	T	G	A	T	G	G	A	A	C	N	G	G	G	G	T	A	T	G	C	T	C	T	G	G	T	T	T	T	C	T	T	G	G	T	T	C	G
T	T	T	G	T	T	A	T	T	C	G	G	T	G	T	G	T	T	T	T	A	C	N	T	T	G	T	C	T	G	T	C	T	C	T	T	T	T	T	G	G	T	T	C	T	T	C	C	T	T
A	T	A	T	G	A	C	G	C	T	T	T	A	T	G	G	A	G	G	T	G	T	N	G	G	A	G	T	T	C	G	T	A	A	G	G	G	A	A	C	T	G	G	T	G	G	T	T	T	G
T	G	T	G	T	T	T	T	T	T	G	G	T	G	T	C	T	T	T	G	T	G	N	T	T	G	T	T	G	C	T	G	T	T	C	T	T	T	T	C	G	G	C	T	T	T	T	T	A	T
G	G	G	T	G	G	A	G	T	A	T	T	G	T	G	T	G	G	G	C	G	T	N	G	G	G	G	A	C	T	G	T	G	A	C	G	G	G	G	A	T	C	C	A	G	G	A	A	T	G
T	A	T	T	T	T	T	T	C	T	T	T	T	T	T	G	T	T	T	C	T	G	N	T	T	C	T	T	C	T	T	G	T	A	T	T	T	T	T	T	T	T	T	T	T	T	T	T	G	T
T	G	T	C	T	T	T	T	G	G	C	C	T	C	T	T	T	T	T	T	G	G	N	T	T	T	T	G	T	T	T	G	T	C	T	T	T	T	T	A	C	T	T	G	T	T	G	G	T	T
G	G	G	T	C	G	G	C	T	T	T	T	G	T	C	G	G	C	C	T	C	T	N	C	C	G	C	T	T	G	C	T	G	A	T	C	C	G	G	A	T	G	T	T	C	C	T	T	T	C
G	C	G	C	T	G	C	T	A	T	C	C	G	C	T	T	G	T	T	T	C	A	N	T	T	T	T	T	T	G	T	A	G	A	G	T	T	G	G	C	C	A	G	T	T	T	T	T	G	T
T	T	T	T	C	T	C	C	A	G	T	T	T	T	C	G	T	C	C	G	T	A	N	C	C	G	C	G	G	A	C	A	T	G	G	C	C	T	T	A	T	A	G	G	C	C	G	G	G	C
T	G	T	T	T	T	T	T	G	G	T	T	T	T	T	T	T	T	T	G	A	T	N	T	T	T	T	G	G	G	T	T	T	T	A	T	T	T	T	A	T	A	A	G	T	T	G	G	T	T
G	T	G	A	T	G	T	T	G	T	A	A	G	A	T	T	G	T	T	A	T	T	N	T	T	G	T	T	A	G	T	T	G	G	G	T	T	G	G	G	A	A	G	T	T	T	T	T	T	T
C	G	C	T	A	C	T	A	G	T	T	T	C	T	A	C	C	A	A	G	T	T	N	A	A	T	A	T	G	C	A	T	C	T	G	A	A	C	C	T	T	C	G	T	A	A	T	T	G	A
C	T	C	G	T	C	G	T	T	G	G	G	C	G	T	T	C	T	T	G	G	T	N	T	T	T	T	G	G	T	T	T	C	G	C	T	T	C	C	G	G	C	C	G	T	T	G	G	C	T
A	G	A	T	G	A	G	G	G	C	T	T	A	T	G	C	A	G	G	C	G	A	N	G	G	C	G	C	C	G	G	A	A	C	T	G	G	A	A	T	T	A	T	C	G	G	C	C	C	G
T	T	T	T	T	T	A	T	G	C	T	T	T	T	T	T	T	T	T	T	G	A	N	T	T	T	T	C	T	T	T	A	T	C	G	T	T	T	T	G	T	T	G	C	T	T	C	C	A	T
A	T	A	G	T	A	G	T	T	A	G	G	A	G	T	T	A	T	T	G	T	A	N	T	T	C	T	A	G	G	T	A	A	T	T	T	T	A	A	C	G	T	T	A	T	T	A	A	T	T
A	C	A	G	G	A	G	G	C	T	G	G	A	G	G	A	A	G	G	T	T	G	N	G	G	T	G	T	T	T	G	G	A	A	G	G	G	A	A	C	G	C	G	T	G	G	T	T	A	G
C	T	C	T	G	C	C	G	G	A	T	T	C	T	G	T	C	G	G	G	C	T	N	G	G	T	G	A	G	G	G	T	C	T	T	G	G	C	C	T	T	T	T	A	G	G	A	A	A	G
A	C	A	T	T	A	T	T	C	A	T	T	A	T	T	G	A	T	T	T	C	T	N	T	T	A	T	A	T	T	T	T	A	T	G	T	T	A	A	A	T	T	G	A	T	T	A	A	C	T
A	T	A	G	T	A	G	T	A	C	G	G	A	G	T	T	A	T	T	G	A	A	N	T	T	T	T	C	G	T	T	A	A	G	T	T	T	A	A	T	G	C	T	C	T	T	C	C	A	T
G	T	G	C	G	G	T	G	C	A	C	C	G	C	G	T	G	G	G	T	C	C	N	G	G	G	G	A	T	C	G	C	G	G	T	G	G	G	G	T	C	G	T	A	G	G	A	A	A	G
T	A	T	C	C	T	G	C	T	A	C	C	T	C	C	G	T	C	C	T	G	A	N	C	C	T	C	A	T	T	C	A	T	G	C	C	C	T	T	G	C	T	C	A	C	C	A	A	G	C
G	T	G	A	C	G	T	C	A	G	A	A	G	A	C	G	G	C	C	C	T	A	N	C	C	T	C	G	C	C	C	A	G	T	T	C	C	G	G	G	A	A	T	G	C	C	G	G	T	C
T	G	T	T	A	T	G	A	T	T	T	T	T	T	A	T	T	A	A	T	G	A	N	A	A	G	A	T	T	T	A	A	T	T	C	A	A	T	T	G	T	A	C	T	A	A	T	T	G	A
G	T	G	A	T	G	T	T	T	G	A	A	G	A	T	T	G	T	T	C	C	A	N	T	T	G	T	G	C	T	T	A	G	C	T	T	T	G	G	T	A	G	T	G	T	T	G	G	T	T
C	T	C	A	A	C	T	A	G	T	A	A	C	A	A	G	C	A	A	T	T	G	N	A	A	T	A	T	T	A	A	G	C	C	T	A	A	C	C	T	A	G	T	T	A	A	T	T	G	A
C	G	C	C	A	C	C	A	C	G	C	C	C	C	A	C	C	A	A	T	A	G	N	A	A	T	A	G	T	T	A	G	C	A	A	A	A	C	C	C	C	G	A	G	A	A	G	G	C	A
T	G	T	A	C	T	T	C	C	C	A	A	T	A	C	C	T	C	C	A	G	A	N	C	C	G	C	C	A	G	C	A	T	C	T	C	C	T	T	C	A	T	T	C	C	C	C	C	C	C
A	T	A	A	A	A	C	A	T	C	A	A	A	A	A	A	A	A	A	T	C	A	N	A	A	C	A	C	T	T	A	A	A	G	G	A	A	A	A	A	A	G	G	C	A	A	C	C	T	A
T	T	T	G	A	T	T	A	T	T	G	G	T	G	A	T	T	A	A	G	G	A	N	A	A	C	A	T	G	T	A	A	T	T	T	A	A	T	T	C	G	G	T	T	A	A	T	T	A	A
T	G	T	T	G	T	T	G	T	A	T	T	T	T	G	A	T	G	G	T	C	A	N	G	G	A	G	A	T	G	G	A	T	G	T	G	G	T	T	G	T	T	T	A	G	G	A	A	T	G
G	C	G	G	T	G	A	T	G	T	G	G	G	G	T	A	G	T	T	T	T	G	N	T	T	T	T	T	T	G	T	G	G	C	G	T	T	G	G	T	G	C	G	T	T	T	T	T	T	T
G	C	G	T	G	G	T	G	G	T	T	T	G	T	G	C	G	G	G	G	A	C	N	G	G	A	G	T	G	T	G	C	G	T	G	G	G	G	G	G	T	G	G	T	G	G	T	T	G	G
G	A	G	G	T	G	G	T	A	G	G	G	G	G	T	A	G	T	T	G	A	T	N	T	T	A	T	G	G	T	T	T	G	A	T	T	T	G	G	C	G	C	T	G	T	T	G	G	G	T
T	T	T	C	G	T	T	G	G	G	C	C	T	C	G	A	T	G	G	T	C	A	N	G	G	C	G	G	T	G	G	A	T	G	T	G	G	T	T	T	C	A	T	G	G	G	G	G	G	G
T	A	T	C	C	T	T	C	G	G	C	C	T	C	C	G	T	C	C	T	A	A	N	C	C	A	C	G	T	C	C	A	T	C	G	C	C	T	T	A	C	C	G	G	C	C	G	G	T	C
C	A	C	T	C	C	G	C	C	T	T	T	C	T	C	T	C	C	C	G	T	A	N	C	C	A	C	T	G	C	C	A	C	G	C	C	C	C	C	G	T	T	C	T	C	C	T	T	T	C
C	C	C	A	T	C	G	T	T	T	A	A	C	A	T	G	C	T	T	C	A	A	N	T	T	G	T	T	C	A	T	A	C	C	C	T	T	C	C	C	A	A	C	T	T	T	T	T	C	T
A	A	A	T	A	A	T	A	G	C	T	T	A	T	A	T	A	A	A	C	G	A	N	A	A	T	A	C	C	T	A	A	A	T	A	A	A	A	A	G	T	T	A	C	A	A	C	C	C	A
C	A	C	T	T	C	T	T	T	C	T	T	C	T	T	G	C	T	T	A	G	A	N	T	T	G	T	C	A	A	T	A	C	A	T	T	T	C	C	C	T	T	T	C	T	T	C	C	A	T
G	G	G	G	T	G	G	T	G	A	G	G	G	G	T	C	G	T	T	T	T	G	N	T	T	T	T	A	T	A	T	G	G	A	A	T	T	G	G	T	G	G	A	A	T	T	A	A	C	T
T	T	T	G	G	T	C	G	T	C	G	G	T	G	G	C	T	G	G	A	T	G	N	G	G	G	G	C	A	C	G	G	T	C	A	G	G	T	T	A	G	C	A	C	G	G	C	C	G	G
G	G	G	G	G	G	C	G	G	G	G	G	G	G	G	T	G	G	G	A	G	T	N	G	G	C	G	G	A	A	G	T	G	A	C	G	G	G	G	A	G	C	C	G	G	G	G	G	T	G
C	T	C	T	G	C	A	G	T	T	T	T	C	T	G	A	C	G	G	C	T	G	N	G	G	C	G	T	C	A	G	G	C	T	A	G	G	C	C	C	T	T	A	T	G	G	T	T	G	G
T	G	T	T	T	T	T	T	T	G	T	T	T	T	T	T	T	T	T	A	A	C	N	T	T	T	T	G	A	G	T	C	T	A	A	T	T	T	T	A	T	T	A	G	T	T	G	G	C	T
A	C	A	C	T	A	A	T	C	C	C	C	A	C	T	T	A	T	T	A	A	C	N	T	T	A	T	C	A	T	T	C	A	G	G	T	T	A	A	T	C	T	G	C	T	T	C	C	T	T
G	C	G	C	C	G	A	C	T	T	C	C	G	C	C	G	G	C	C	G	C	T	N	C	C	T	C	T	G	G	C	T	G	G	T	C	C	G	G	A	C	G	T	T	C	C	T	T	A	C
C	T	C	A	C	C	C	C	C	A	A	A	C	A	C	G	C	C	C	T	C	G	N	C	C	T	C	A	T	T	C	G	C	T	G	C	C	C	C	G	A	G	G	A	C	C	A	A	G	C
G	A	G	C	A	G	A	A	T	G	C	C	G	C	A	G	G	A	A	G	A	G	N	A	A	G	A	G	G	G	A	G	G	T	T	A	A	G	G	G	C	A	T	G	A	A	G	G	C	A
C	T	C	G	C	C	A	C	T	C	G	G	C	G	C	T	C	C	C	T	T	A	N	C	C	G	C	C	T	C	C	A	C	G	G	C	C	C	C	T	G	G	G	C	C	C	C	C	G	C
T	T	T	T	G	T	G	G	A	G	T	T	T	T	G	T	T	G	G	G	A	A	N	G	G	G	G	G	G	C	G	A	T	T	C	G	G	T	T	T	T	G	C	G	G	G	G	G	C	G
A	G	A	G	T	A	T	T	T	C	G	G	A	G	T	C	A	T	T	C	C	T	N	T	T	T	T	C	C	T	T	T	A	A	C	T	T	A	A	G	G	C	C	C	T	T	C	C	T	T
A	G	A	C	G	A	G	G	G	T	C	C	A	C	G	C	A	G	G	C	A	A	N	G	G	T	G	T	C	A	G	A	A	A	T	G	G	A	A	T	C	T	T	T	G	G	T	T	A	G
C	G	C	T	C	C	T	C	T	A	T	T	C	T	C	A	C	C	C	T	G	T	N	C	C	C	C	A	T	T	C	T	C	C	A	C	C	C	C	A	T	G	A	A	C	C	A	A	A	C
A	T	A	A	T	A	G	T	T	A	A	A	A	A	T	C	A	T	T	A	G	T	N	T	T	C	T	A	A	T	T	T	A	C	T	T	T	A	A	A	A	T	T	A	T	T	A	A	C	T
T	T	T	G	A	T	C	A	G	C	G	G	T	G	A	G	T	A	A	T	T	G	N	A	A	A	A	C	T	G	A	G	T	A	T	A	A	T	T	C	G	G	T	C	A	A	C	C	A	A
A	C	A	C	G	A	C	G	G	A	C	C	A	C	G	T	A	G	G	T	G	G	N	G	G	C	G	A	T	G	G	G	A	T	G	G	G	A	A	C	C	T	G	A	G	G	A	A	T	G
G	C	G	G	C	G	T	C	T	T	G	G	G	G	C	G	G	C	C	G	T	T	N	C	C	G	C	T	G	G	C	T	G	A	G	C	C	G	G	A	G	G	G	T	C	C	T	T	A	C
G	A	G	C	G	G	A	G	T	A	C	C	G	C	G	C	G	G	G	G	T	G	N	G	G	T	G	A	G	T	G	G	G	C	G	G	G	G	G	T	C	T	G	A	G	G	A	A	G	G
T	C	T	T	C	T	T	C	G	G	T	T	T	T	C	T	T	C	C	G	G	A	N	C	C	G	C	G	G	T	C	A	T	A	T	C	C	T	T	A	T	T	T	G	C	C	G	G	G	C
T	G	T	A	T	T	T	T	C	G	A	A	T	A	T	A	T	T	T	T	T	A	N	T	T	C	T	G	T	C	T	A	T	G	T	T	T	T	T	C	A	C	T	G	T	T	G	G	T	T
G	T	G	A	A	G	G	A	C	T	A	A	G	A	A	G	G	A	A	T	T	C	N	A	A	T	A	T	T	C	A	C	G	G	C	A	A	G	G	A	A	T	C	T	A	A	T	T	T	A
T	G	T	C	A	T	G	A	A	T	C	C	T	C	A	C	T	A	A	C	G	A	N	A	A	A	A	T	C	A	A	A	T	T	C	A	A	T	T	G	C	C	C	T	A	A	T	T	G	A
A	C	A	A	C	A	G	C	T	G	A	A	A	A	C	G	A	C	C	C	G	G	N	C	C	G	C	G	C	C	C	G	A	G	A	C	C	A	A	G	A	T	A	G	C	C	G	G	T	C
A	T	A	T	A	A	T	A	A	T	T	T	A	T	A	C	A	A	A	A	A	A	N	A	A	C	A	T	A	G	A	A	A	T	C	A	A	A	A	T	T	T	C	T	A	A	T	T	A	A
C	A	C	A	T	C	T	T	A	A	A	A	C	A	T	T	C	T	T	C	G	A	N	T	T	G	T	A	C	T	T	A	C	T	G	T	T	C	C	G	A	A	G	A	T	T	A	A	A	T
C	G	C	G	A	C	C	A	C	A	G	G	C	G	A	A	C	A	A	G	A	A	N	A	A	C	A	A	G	G	A	A	C	G	T	A	A	C	C	T	G	T	T	A	A	A	A	A	C	A
A	C	A	G	G	A	C	G	A	C	G	G	A	G	G	A	A	G	G	T	A	T	N	G	G	T	G	C	T	C	G	T	A	T	G	G	G	A	A	T	G	G	G	C	G	G	C	C	C	G
T	G	T	T	G	T	A	G	A	C	T	T	T	T	G	C	T	G	G	G	G	C	N	G	G	A	G	C	G	T	G	C	T	T	C	G	G	T	T	G	T	T	C	C	G	G	C	C	A	G
A	C	A	T	T	A	C	T	G	A	T	T	A	T	T	A	A	T	T	C	G	A	N	T	T	A	T	A	C	A	T	A	A	G	T	T	T	A	A	T	T	T	T	A	T	T	A	A	T	T
C	T	C	G	T	C	G	T	T	T	G	G	C	G	T	T	C	T	T	T	T	A	N	T	T	C	T	T	T	G	T	A	C	G	A	T	T	C	C	T	G	G	A	T	T	T	T	T	A	T
A	A	A	T	G	A	T	G	G	A	T	T	A	T	G	A	A	G	G	A	T	T	N	G	G	A	G	A	A	C	G	T	A	A	G	G	G	A	A	G	T	G	G	A	G	G	A	A	C	G
G	A	G	A	T	G	G	T	T	C	A	A	G	A	T	G	G	T	T	G	C	A	N	T	T	T	T	C	G	G	T	A	G	G	C	T	T	G	G	G	A	T	C	C	T	T	C	C	A	T
G	C	G	A	A	G	C	A	G	A	A	A	G	A	A	G	G	A	A	C	C	C	N	A	A	A	A	A	C	C	A	C	G	A	G	A	A	G	G	A	A	T	G	A	A	A	A	A	G	A
T	A	T	C	A	T	T	A	C	G	C	C	T	C	A	T	T	A	A	G	G	T	N	A	A	G	A	G	G	T	A	T	T	A	C	A	A	T	T	G	C	G	C	G	A	A	G	G	G	A
G	T	G	C	C	G	A	C	C	G	C	C	G	C	C	T	G	C	C	C	A	G	N	C	C	G	C	G	C	A	C	G	G	G	T	C	C	G	G	A	C	C	T	G	C	C	G	G	T	C
T	A	T	A	C	T	G	C	T	T	A	A	T	A	C	G	T	C	C	T	A	A	N	C	C	T	C	T	T	A	C	A	T	G	A	C	C	T	T	A	A	C	A	T	C	C	T	T	G	C
T	G	T	T	A	T	C	A	A	G	T	T	T	T	A	T	T	A	A	A	G	G	N	A	A	T	A	G	A	C	A	G	T	T	A	A	A	T	T	G	T	A	A	G	A	A	G	G	T	A
G	G	G	A	T	G	G	T	T	T	A	A	G	A	T	A	G	T	T	A	G	T	N	T	T	G	T	T	A	A	T	T	G	T	C	T	T	G	G	G	A	T	C	T	T	T	T	T	T	T
T	T	T	C	A	T	C	A	T	T	C	C	T	C	A	A	T	A	A	C	T	C	N	A	A	T	A	T	C	T	A	C	T	C	A	A	A	T	T	T	C	A	A	T	A	A	T	T	G	A
T	T	T	A	C	T	T	C	G	G	A	A	T	A	C	C	T	C	C	A	C	C	N	C	C	A	C	G	A	A	C	C	T	C	T	C	C	T	T	T	A	A	T	G	C	C	G	G	T	C
G	G	G	G	A	G	A	A	G	T	G	G	G	G	A	C	G	A	A	T	T	T	N	A	A	A	A	T	T	G	A	T	G	G	A	A	A	G	G	C	G	C	A	T	A	A	T	T	T	A
G	T	G	G	G	G	A	G	G	T	G	G	G	G	G	A	G	G	G	A	T	C	N	G	G	C	G	T	A	G	G	C	G	A	G	G	G	G	G	C	G	A	G	T	G	G	T	T	G	G
A	A	A	T	G	A	C	G	T	G	T	T	A	T	G	T	A	G	G	G	A	T	N	G	G	C	G	G	G	T	G	T	A	A	G	G	G	A	A	G	T	A	G	G	G	G	G	G	G	G
G	A	G	G	T	G	A	T	T	G	G	G	G	G	T	A	G	T	T	G	A	T	N	T	T	A	T	G	G	T	T	T	G	G	T	T	T	G	G	A	G	G	T	G	T	T	G	G	A	T
A	C	A	T	G	A	T	G	C	A	T	T	A	T	G	C	A	G	G	T	T	T	N	G	G	T	G	A	T	G	G	T	A	G	T	G	G	A	A	A	T	T	T	A	G	G	A	A	G	G
A	C	A	T	T	A	A	T	C	G	T	T	A	T	T	A	A	T	T	T	G	A	N	T	T	A	T	G	T	T	T	A	A	T	G	T	T	A	A	G	T	G	G	G	T	T	G	G	A	T
G	A	G	G	T	G	G	T	A	A	G	G	G	G	T	G	G	T	T	G	A	T	N	T	T	C	T	A	G	A	T	T	G	C	T	T	T	G	G	G	G	T	T	A	T	T	A	A	A	T
G	T	G	T	G	G	G	G	C	A	T	T	G	T	G	G	G	G	G	T	C	G	N	G	G	A	G	A	T	A	G	G	G	T	A	G	G	G	G	T	T	G	A	A	G	G	A	A	G	G
T	A	T	T	T	T	T	T	G	G	T	T	T	T	T	T	T	T	T	A	A	C	N	T	T	G	T	G	A	C	T	C	T	T	A	T	T	T	T	C	T	C	A	G	T	T	G	G	G	T
T	C	T	G	T	T	T	T	T	G	G	G	T	G	T	G	T	T	T	A	A	A	N	T	T	G	T	G	A	C	T	A	T	A	C	T	T	T	T	T	G	C	C	G	T	T	G	G	T	T
C	A	C	G	G	C	G	G	G	T	G	G	C	G	G	T	C	G	G	C	C	T	N	G	G	T	G	T	C	A	G	T	C	A	C	G	G	C	C	T	G	T	C	T	G	G	T	T	T	G
C	G	C	A	G	C	T	G	C	T	A	A	C	A	G	T	C	G	G	C	C	T	N	G	G	G	G	T	C	T	G	T	C	T	A	G	G	C	C	A	A	A	A	T	G	G	T	T	C	G
G	G	G	G	A	G	A	A	T	C	G	G	G	G	A	G	G	A	A	A	T	T	N	A	A	T	A	C	A	A	A	T	G	G	T	A	A	G	G	A	G	T	T	C	A	A	C	C	C	A
A	T	A	A	G	A	A	G	A	C	A	A	A	A	G	T	A	G	G	T	T	G	N	G	G	T	G	C	T	C	G	G	A	A	A	G	G	A	A	T	A	T	A	C	G	G	C	C	G	G
A	G	A	A	A	A	C	A	G	G	A	A	A	A	A	T	A	A	A	A	C	C	N	A	A	G	A	G	A	A	A	C	A	C	C	A	A	A	A	G	A	G	C	G	A	A	G	G	A	A
G	T	G	G	A	G	C	A	C	A	G	G	G	G	A	G	G	A	A	C	T	A	N	A	A	T	A	A	C	G	A	A	G	A	A	A	A	G	G	A	G	G	A	A	A	A	A	A	A	A
G	T	G	G	G	G	A	G	G	A	G	G	G	G	G	G	G	G	G	A	T	T	N	G	G	T	G	A	A	G	G	T	G	A	G	G	G	G	G	C	G	G	G	A	G	G	A	A	G	G
T	G	T	T	G	T	T	G	C	G	T	T	T	T	G	A	T	G	G	G	G	C	N	G	G	G	G	G	G	T	G	C	T	C	G	G	G	T	T	A	T	T	G	G	G	G	G	G	G	G
C	T	C	T	T	C	A	T	T	G	T	T	C	T	T	G	C	T	T	G	A	A	N	T	T	G	T	G	G	G	T	A	C	C	T	T	T	C	C	A	T	T	T	G	T	T	G	G	T	T
T	T	T	C	T	T	C	T	A	T	C	C	T	C	T	A	T	T	T	T	A	G	N	T	T	A	T	T	T	T	T	G	T	T	G	T	T	T	T	C	C	C	G	T	T	T	T	T	C	T
T	G	T	C	C	T	A	C	A	C	C	C	T	C	C	A	T	C	C	G	A	A	N	C	C	G	C	C	G	T	C	A	T	T	T	C	C	T	T	C	C	C	T	C	C	C	C	C	T	C
A	G	A	G	C	A	G	C	C	T	G	G	A	G	C	G	A	C	C	T	T	G	N	C	C	A	C	T	T	G	C	G	A	C	T	C	C	A	A	T	G	A	T	T	C	C	T	T	T	C
A	A	A	A	G	A	G	G	A	T	A	A	A	A	G	G	A	G	G	T	A	G	N	G	G	A	G	T	T	T	G	G	A	T	G	G	G	A	A	T	A	C	G	T	G	G	T	T	A	G
T	G	T	A	A	T	T	A	T	A	A	A	T	A	A	T	T	A	A	G	C	C	A	A	A	G	A	A	G	T	A	C	T	T	T	A	A	T	T	C	A	G	T	A	A	A	A	A	A	A
G	A	G	G	A	G	G	A	A	A	G	G	G	G	A	T	G	A	A	T	T	T	A	A	A	G	A	A	T	G	A	T	G	G	T	A	A	G	G	T	G	T	T	A	A	A	A	A	T	A
A	A	A	G	G	A	T	G	G	T	G	G	A	G	G	C	A	G	G	T	C	G	G	G	G	T	G	T	T	G	G	G	A	A	G	G	G	A	A	T	G	G	G	T	G	G	T	T	G	G
C	G	C	T	G	C	T	G	G	G	T	T	C	T	G	C	C	G	G	G	C	C	G	G	G	T	G	G	G	A	G	C	C	A	G	G	G	C	C	G	T	C	G	G	G	G	G	G	A	G
A	G	A	C	T	A	G	T	T	A	C	C	A	C	T	G	A	T	T	G	A	T	T	T	T	C	T	A	G	G	T	T	A	A	A	T	T	A	A	A	C	T	A	A	T	T	A	A	C	T
A	T	A	T	C	A	T	C	T	C	T	T	A	T	C	A	A	C	C	A	A	C	C	C	C	C	C	C	A	A	C	C	A	T	G	C	C	A	A	A	T	A	G	C	C	C	C	C	A	C
C	T	C	T	T	C	T	T	G	A	T	T	C	T	T	A	C	T	T	G	A	G	T	T	T	G	T	A	G	A	T	G	C	A	A	T	T	C	C	A	T	G	A	A	T	T	A	A	A	T
C	C	C	A	T	C	G	T	T	A	A	A	C	A	T	G	C	T	T	A	A	T	T	T	T	A	T	A	A	G	T	T	C	C	A	T	T	C	C	T	A	C	A	A	T	T	A	A	C	T
T	C	T	A	A	T	G	A	A	C	A	A	T	A	A	G	T	A	A	A	A	G	A	A	A	A	A	C	A	G	A	G	T	T	G	A	A	T	T	A	A	G	G	C	A	A	C	C	C	A
T	G	T	T	A	T	A	A	A	C	T	T	T	T	A	T	T	A	A	G	G	T	A	A	A	G	A	C	G	T	A	T	T	C	G	A	A	T	T	C	T	C	G	C	A	A	C	C	T	A
C	A	C	G	T	C	G	T	C	T	G	G	C	G	T	C	C	T	T	G	A	T	T	T	T	G	T	T	G	T	T	T	C	C	T	T	T	C	C	T	G	T	T	T	T	T	T	T	T	T
T	A	T	A	G	T	A	G	C	T	A	A	T	A	G	T	T	G	G	T	G	G	G	G	G	T	G	T	T	C	G	G	T	A	T	G	G	T	T	C	A	A	T	T	G	G	T	T	C	G
T	G	T	C	A	T	A	A	A	C	C	C	T	C	A	T	T	A	A	T	A	T	A	A	A	C	A	C	T	C	A	T	T	A	C	A	A	T	T	C	C	A	C	C	A	A	C	C	T	A
G	G	G	A	C	G	G	C	T	T	A	A	G	A	C	A	G	C	C	C	A	A	C	C	C	T	C	T	C	G	C	A	G	A	C	C	C	G	G	A	A	C	C	T	C	C	T	T	T	C
A	T	A	A	A	A	G	A	A	T	A	A	A	A	A	A	A	A	A	C	A	C	A	A	A	T	A	T	C	A	A	C	A	A	G	A	A	A	A	A	A	A	G	T	A	A	T	T	G	A
A	C	A	C	A	A	T	A	C	G	C	C	A	C	A	T	A	A	A	G	G	G	A	A	A	A	A	G	G	A	A	G	A	A	A	A	A	A	A	A	C	T	A	G	A	A	G	G	A	A
A	T	A	C	C	A	T	C	A	A	C	C	A	C	C	G	A	C	C	A	T	A	C	C	C	A	C	A	A	G	C	A	A	G	A	C	C	A	A	A	C	A	A	A	C	C	A	A	A	C
T	T	T	T	C	T	C	C	G	A	T	T	T	T	C	A	T	C	C	A	C	T	C	C	C	T	C	A	A	G	C	T	T	A	G	C	C	T	T	A	T	G	G	A	C	C	A	A	A	C
A	A	A	T	T	A	C	T	G	A	T	T	A	T	T	C	A	T	T	G	A	C	T	T	T	G	T	A	G	T	T	C	A	G	G	T	T	A	A	G	T	G	G	A	T	T	A	A	T	T
C	A	C	C	T	C	G	T	T	T	C	C	C	C	T	A	C	T	T	G	A	A	T	T	T	A	T	T	G	C	T	A	C	A	T	T	T	C	C	A	C	T	T	T	T	T	T	T	A	T
T	T	T	T	C	T	A	C	G	A	T	T	T	T	C	A	T	C	C	T	C	A	C	C	C	C	C	A	T	T	C	A	T	A	C	C	C	T	T	G	T	T	C	A	C	C	A	A	C	C
C	G	C	T	T	C	A	T	T	C	T	T	C	T	T	C	C	T	T	C	A	T	T	T	T	A	T	C	C	T	T	T	C	A	T	T	T	C	C	A	T	G	T	C	T	T	C	C	T	T
C	A	C	G	T	C	G	T	T	T	G	G	C	G	T	C	C	T	T	T	T	T	T	T	T	A	T	T	T	A	T	T	C	G	T	T	T	C	C	A	G	T	T	T	T	T	T	T	C	T
A	C	A	A	G	A	G	G	G	C	A	A	A	A	G	T	A	G	G	T	C	T	G	G	G	C	G	C	T	A	G	T	A	T	A	G	G	A	A	A	A	A	A	C	G	G	C	C	C	G
A	A	A	A	A	A	T	A	T	C	A	A	A	A	A	T	A	A	A	A	A	T	A	A	A	C	A	C	A	T	A	T	A	C	A	A	A	A	A	G	A	A	A	C	A	A	C	C	A	A
A	A	A	A	A	A	C	A	T	A	A	A	A	A	A	C	A	A	A	A	A	C	A	A	A	T	A	A	A	G	A	C	A	A	T	A	A	A	A	T	A	C	T	A	A	A	A	A	A	A
A	C	A	T	A	A	T	A	G	A	T	T	A	T	A	T	A	A	A	T	T	T	A	A	A	T	A	A	T	A	A	T	A	A	G	A	A	A	A	C	T	C	G	A	A	A	A	A	A	A
A	C	A	A	T	A	T	T	G	A	A	A	A	A	T	T	A	T	T	G	A	C	T	T	T	C	T	A	G	C	T	C	A	C	A	T	T	A	A	A	A	A	A	A	T	T	A	A	A	T
G	T	G	C	A	G	A	A	A	A	C	C	G	C	A	G	G	A	A	A	T	C	A	A	A	T	A	A	A	A	A	C	G	A	C	A	A	G	G	A	C	T	C	A	A	A	A	A	A	A
A	T	A	T	C	A	A	C	G	A	T	T	A	T	C	A	A	C	C	C	T	C	C	C	C	T	C	A	C	A	C	C	A	T	A	C	C	A	A	C	T	A	A	A	C	C	A	A	G	C
G	C	G	C	T	G	T	T	A	G	C	C	G	C	T	A	G	T	T	A	G	G	T	T	T	G	T	G	A	C	T	G	G	C	A	T	T	G	G	A	C	C	A	G	T	T	G	G	A	T
A	T	A	C	C	A	G	C	A	A	C	C	A	C	C	A	A	C	C	A	T	C	C	C	C	A	C	A	A	C	C	C	A	A	C	C	C	A	A	T	C	A	C	A	C	C	A	A	G	C
A	T	A	A	C	A	A	C	G	G	A	A	A	A	C	T	A	C	C	C	T	A	C	C	C	A	C	G	C	T	C	A	A	A	C	C	C	A	A	C	A	G	C	G	C	C	G	G	A	C
A	G	A	A	A	A	C	A	G	A	A	A	A	A	A	A	A	A	A	C	G	C	A	A	A	A	A	A	C	T	A	C	A	T	T	A	A	A	A	A	A	G	T	A	A	A	A	A	A	A
G	A	G	A	A	G	A	A	T	A	A	A	G	A	A	C	G	A	A	T	G	T	A	A	A	T	A	A	T	C	A	T	G	A	T	A	A	G	G	A	A	T	T	A	A	A	A	A	A	A
T	A	T	A	A	T	A	A	T	A	A	A	T	A	A	T	T	A	A	T	T	C	A	A	A	A	A	A	T	T	A	C	T	T	C	A	A	T	T	T	A	G	C	A	A	A	A	A	G	A
C	A	C	A	A	C	C	A	C	G	A	A	C	A	A	C	C	A	A	C	G	T	A	A	A	C	A	G	C	T	A	T	C	T	T	A	A	C	C	A	A	T	T	G	A	A	G	G	T	A
A	T	A	G	A	A	C	A	C	T	G	G	A	G	A	C	A	A	A	T	A	T	A	A	A	T	A	T	T	G	A	T	A	G	T	A	A	A	A	T	G	T	T	T	A	A	T	T	C	A
A	A	A	A	G	A	T	G	G	C	A	A	A	A	G	A	A	G	G	T	C	G	G	G	G	C	G	C	T	A	G	G	A	T	G	G	G	A	A	T	A	G	G	C	G	G	C	C	A	G
C	C	C	G	A	C	T	A	A	A	G	G	C	G	A	A	C	A	A	G	T	A	A	A	A	C	A	A	G	A	A	A	C	T	A	A	A	C	C	G	G	T	A	A	A	A	A	A	A	A
A	T	A	A	G	A	C	G	A	A	A	A	A	A	G	A	A	G	G	A	T	A	G	G	G	A	G	A	A	A	G	A	A	G	A	G	G	A	A	T	A	T	A	A	G	G	A	A	C	G
T	C	T	A	A	T	T	A	G	C	A	A	T	A	A	A	T	A	A	A	T	A	A	A	A	A	A	C	A	T	A	A	T	G	A	A	A	T	T	T	A	G	A	C	A	A	C	C	A	A
C	C	C	A	A	C	T	A	G	A	A	A	C	A	A	A	C	A	A	A	A	C	A	A	A	A	A	A	A	A	A	C	C	T	T	A	A	C	C	G	A	G	T	A	A	A	A	A	T	A
A	A	A	G	A	A	G	A	T	T	G	G	A	G	A	G	A	A	A	T	A	T	A	A	A	A	A	T	T	C	A	T	A	G	A	A	A	A	A	G	G	A	A	T	A	A	T	T	C	A
A	A	A	T	G	A	A	G	C	C	T	T	A	T	G	A	A	G	G	A	A	G	G	G	G	A	G	C	A	T	G	G	A	A	C	G	G	A	A	T	T	G	C	C	G	G	C	C	A	G
T	A	T	C	T	T	A	T	T	A	C	C	T	C	T	G	T	T	T	C	C	C	T	T	T	G	T	A	C	C	T	C	T	C	T	T	T	T	T	G	C	A	T	A	T	T	A	A	A	T
A	A	A	A	C	A	A	C	T	A	A	A	A	A	C	A	A	C	C	T	T	T	C	C	C	A	C	A	T	C	C	T	A	T	C	C	C	A	A	A	A	A	C	A	C	C	A	A	T	C
T	A	T	A	A	T	T	A	A	T	A	A	T	A	A	A	T	A	A	C	T	C	A	A	A	G	A	T	C	A	A	C	T	T	C	A	A	T	T	C	A	G	C	T	A	A	T	T	A	A
T	G	T	C	A	T	A	A	A	A	C	C	T	C	A	A	T	A	A	C	A	A	A	A	A	A	A	A	C	A	A	A	T	T	A	A	A	T	T	T	C	G	A	A	A	A	A	A	T	A
G	A	G	A	C	G	C	C	T	T	A	A	G	A	C	G	G	C	C	A	A	A	C	C	C	A	C	T	A	A	C	A	G	A	A	C	C	G	G	T	A	T	A	T	C	C	T	T	T	C
T	G	T	T	A	T	T	A	G	T	T	T	T	T	A	T	T	A	A	A	T	A	A	A	A	A	A	T	A	A	A	A	T	A	A	A	A	T	T	T	T	T	A	T	A	A	T	T	G	A
T	A	T	C	T	T	C	T	A	G	C	C	T	C	T	C	T	T	T	A	G	A	T	T	T	G	T	G	A	A	T	A	T	A	A	T	T	T	T	A	C	C	A	G	T	T	G	G	T	T
G	A	G	A	C	G	C	C	C	T	A	A	G	A	C	A	G	C	C	A	A	T	C	C	C	T	C	T	A	G	C	T	G	C	A	C	C	G	G	A	A	C	A	T	C	C	T	T	T	C
G	A	G	A	A	G	A	A	A	T	A	A	G	A	A	A	G	A	A	A	A	T	A	A	A	C	A	T	A	A	A	T	G	T	G	A	A	G	G	A	A	G	G	T	A	A	T	T	G	A
T	G	T	T	A	T	A	A	A	G	T	T	T	T	A	C	T	A	A	G	G	C	A	A	A	A	A	G	G	G	A	C	T	T	A	A	A	T	T	C	T	A	A	G	A	A	G	G	G	A
G	T	G	A	T	G	A	T	C	G	A	A	G	A	T	A	G	T	T	A	A	T	T	T	T	A	T	G	A	A	T	T	G	A	G	T	T	G	G	T	A	A	G	G	T	T	G	G	T	T
A	C	A	T	A	A	A	A	C	T	T	T	A	T	A	T	A	A	A	G	G	G	A	A	A	C	A	T	G	A	A	G	A	A	A	A	A	A	A	T	T	G	A	T	A	A	T	T	G	A
C	A	C	T	T	C	A	T	T	G	T	T	C	T	T	C	C	T	T	A	A	T	T	T	T	A	T	G	A	A	T	T	C	T	A	T	T	C	C	A	T	G	A	G	T	T	G	G	A	T
T	A	T	G	T	T	G	T	T	A	G	G	T	G	T	A	T	T	T	A	T	G	T	T	T	T	T	A	A	G	T	G	T	G	A	T	T	T	T	A	G	T	A	A	T	T	A	A	C	T
T	C	T	T	G	T	A	G	C	C	T	T	T	T	G	A	T	G	G	A	C	N	G	G	G	C	G	C	A	T	G	C	T	A	G	G	G	T	T	T	T	C	G	C	G	G	C	C	T	G
T	A	T	T	T	T	G	T	T	T	T	T	T	T	T	T	T	T	T	G	G	N	T	T	T	A	T	T	G	C	T	G	T	A	T	T	T	T	T	G	T	T	T	T	T	T	T	T	T	T
A	T	A	G	T	A	A	T	T	T	G	G	A	G	T	A	A	T	T	T	C	N	T	T	T	A	T	T	T	A	T	T	A	G	C	T	T	A	A	A	G	T	C	T	T	T	T	T	T	T
A	C	A	G	G	A	A	G	G	T	G	G	A	G	G	T	A	G	G	C	C	N	G	G	G	T	G	T	C	A	G	G	A	A	A	G	G	A	A	A	G	A	A	T	G	G	T	T	A	G
A	A	A	T	G	A	A	G	A	A	T	T	A	T	G	T	A	G	G	A	A	N	G	G	G	A	G	A	A	C	G	T	A	G	A	G	G	A	A	G	T	A	A	A	G	G	A	A	A	G
C	A	C	G	T	C	G	T	A	A	G	G	C	G	T	G	C	T	T	A	T	N	T	T	T	T	T	A	A	A	T	T	C	A	C	T	T	C	C	A	G	T	C	A	T	T	A	A	A	T
T	T	T	A	G	T	T	G	A	A	A	A	T	A	G	T	T	G	G	C	T	N	G	G	G	T	G	A	C	T	G	T	T	T	A	G	G	T	T	G	A	G	A	A	G	G	A	A	C	G
T	A	T	C	A	T	C	A	T	C	C	C	T	C	A	T	T	A	A	A	A	N	A	A	A	G	A	C	A	C	A	T	T	C	T	A	A	T	T	A	C	A	T	C	A	A	C	C	T	A
A	T	A	T	C	A	A	C	A	T	T	T	A	T	C	G	A	C	C	T	T	N	C	C	C	T	C	T	T	A	C	A	A	G	C	C	C	A	A	T	T	C	C	T	C	C	T	T	T	C
A	T	A	T	T	A	A	T	C	T	T	T	A	T	T	G	A	T	T	C	T	N	T	T	T	T	T	T	C	A	T	C	A	C	A	T	T	A	A	C	T	A	A	T	T	T	T	T	A	T
T	G	T	T	T	T	C	T	T	A	T	T	T	T	T	T	T	T	T	A	T	N	T	T	T	G	T	A	A	T	T	A	T	C	A	T	T	T	T	G	T	A	A	A	T	T	A	A	A	T
G	T	G	A	T	G	A	T	C	A	A	A	G	A	T	G	G	T	T	A	T	N	T	T	T	G	T	A	A	A	T	G	G	A	T	T	T	G	G	C	A	C	T	A	T	T	A	A	T	T
A	T	A	A	A	A	T	A	C	T	A	A	A	A	A	A	A	A	A	T	G	N	A	A	A	T	A	T	T	T	A	A	A	T	A	A	A	A	A	C	A	C	A	T	A	A	T	T	G	A
A	G	A	A	A	A	C	A	A	G	A	A	A	A	A	C	A	A	A	A	G	N	A	A	A	G	A	G	A	T	A	A	A	T	T	A	A	A	A	A	A	T	T	G	A	A	G	G	A	A
G	G	G	C	A	G	A	A	A	A	C	C	G	C	A	T	G	A	A	T	C	N	A	A	A	A	A	A	T	G	A	G	G	A	T	A	A	G	G	T	C	T	T	A	A	A	A	A	A	A
A	T	A	T	C	A	A	C	A	A	T	T	A	T	C	T	A	C	C	T	A	N	C	C	C	C	C	A	T	T	C	G	A	T	G	C	C	A	A	T	T	C	G	A	C	C	A	A	G	C
G	G	G	T	T	G	T	T	A	G	T	T	G	T	T	T	G	T	T	G	T	N	T	T	T	T	T	G	G	T	T	C	G	T	T	T	T	G	G	A	T	T	T	G	T	T	G	G	A	T
A	A	A	A	T	A	A	T	A	A	A	A	A	A	T	A	A	T	T	T	C	N	T	T	T	T	T	A	T	G	T	C	A	T	T	T	T	A	A	T	A	T	T	A	T	T	A	A	G	T
T	C	T	A	A	T	T	A	G	G	A	A	T	A	A	A	T	A	A	T	T	N	A	A	A	T	A	G	T	G	A	G	T	T	G	A	A	T	T	T	A	G	G	G	A	A	G	G	A	A
C	T	C	T	A	C	T	A	A	A	T	T	C	T	A	A	C	A	A	G	T	N	A	A	A	A	A	A	G	T	A	C	C	G	G	A	A	C	C	T	T	A	G	A	A	A	A	A	T	A
G	T	G	G	T	G	G	T	G	T	G	G	G	G	T	C	G	T	T	G	T	N	T	T	T	A	T	T	G	G	T	T	G	G	T	T	T	G	G	T	G	A	T	T	T	T	T	T	C	T
C	T	C	A	G	C	T	G	A	C	A	A	C	A	G	T	C	G	G	T	T	N	G	G	G	A	G	C	T	A	G	A	C	C	G	G	G	C	C	G	A	A	G	C	G	G	C	C	G	G
C	A	C	A	A	C	T	A	A	G	A	A	C	A	A	T	C	A	A	G	T	N	A	A	A	C	A	G	G	C	A	T	C	A	A	A	A	C	C	G	A	T	A	G	A	A	G	G	C	A
A	A	A	G	A	A	G	A	A	C	G	G	A	G	A	A	A	A	A	A	C	N	A	A	A	T	A	C	A	T	A	A	A	T	C	A	A	A	A	C	G	A	C	C	A	A	C	C	C	A
T	A	T	A	G	T	G	G	G	C	A	A	T	A	G	A	T	G	G	C	T	N	G	G	G	T	G	C	C	T	G	A	T	C	T	G	G	T	T	A	A	C	T	C	G	G	C	C	A	G
T	C	T	G	A	T	T	A	T	A	G	G	T	G	A	T	T	A	A	T	G	N	A	A	A	A	A	A	T	T	A	C	T	T	T	A	A	T	T	T	G	T	T	A	A	A	A	A	T	A
A	T	A	A	G	A	G	G	C	T	A	A	A	A	G	G	A	G	G	T	C	N	G	G	G	A	G	T	T	A	G	A	A	T	T	G	G	A	A	C	A	C	T	T	G	G	T	T	T	G
T	T	T	T	A	T	A	A	A	T	T	T	T	T	A	A	T	A	A	T	T	N	A	A	A	T	A	T	T	A	A	A	T	T	A	A	A	T	T	T	T	C	A	T	A	A	T	T	A	A
T	A	T	C	T	T	C	T	A	A	C	C	T	C	T	A	T	T	T	A	T	N	T	T	T	G	T	A	A	A	T	T	T	T	A	T	T	T	T	T	C	A	A	A	T	T	A	A	T	T
T	A	T	G	C	T	T	C	C	T	G	G	T	G	C	G	T	C	C	A	C	N	C	C	C	A	C	T	A	C	C	A	T	T	A	C	C	T	T	T	G	A	A	T	C	C	T	T	T	C
T	T	T	C	G	T	T	G	A	T	C	C	T	C	G	A	T	G	G	A	C	N	G	G	G	A	G	T	A	T	G	C	T	C	C	G	G	T	T	T	C	A	C	T	G	G	T	T	T	G
G	G	G	C	C	G	T	C	T	T	C	C	G	C	C	G	G	C	C	C	A	N	C	C	C	G	C	T	C	T	C	T	G	T	T	C	C	G	G	T	C	A	T	T	C	C	T	T	T	C
G	A	G	A	C	G	A	C	C	T	A	A	G	A	C	A	G	C	C	T	C	N	C	C	C	A	C	T	T	A	C	A	G	G	T	C	C	G	G	C	A	A	T	T	C	C	T	T	G	C
C	A	C	T	A	C	A	A	A	G	T	T	C	T	A	T	C	A	A	T	A	N	A	A	A	G	A	G	T	A	A	G	C	C	A	A	A	C	C	T	T	G	A	G	A	A	G	G	G	A
A	G	A	T	T	A	A	T	A	G	T	T	A	T	T	C	A	T	T	A	A	N	T	T	T	A	T	G	A	T	T	A	A	T	A	T	T	A	A	G	T	A	A	G	T	T	G	G	C	T
T	A	T	A	T	T	C	T	T	C	A	A	T	A	T	G	T	T	T	A	G	N	T	T	T	T	T	C	A	G	T	T	T	T	T	T	T	T	T	C	A	G	T	C	T	T	C	C	A	T
C	G	C	T	A	C	T	A	A	A	T	T	C	T	A	C	C	A	A	T	T	N	A	A	A	C	A	A	T	A	A	G	C	C	G	A	A	C	C	T	T	A	G	A	A	A	A	A	T	A
T	A	T	T	T	T	T	T	T	T	T	T	T	T	T	C	T	T	T	G	G	N	T	T	T	G	T	T	G	A	T	G	T	C	A	T	T	T	T	T	T	A	A	T	T	T	T	T	C	T
T	T	T	T	T	T	A	T	T	C	T	T	T	T	T	A	T	T	T	A	C	N	T	T	T	C	T	C	A	G	T	A	T	A	A	T	T	T	T	C	T	A	A	C	T	T	C	C	T	T
T	C	T	T	T	T	A	T	G	T	T	T	T	T	T	T	T	T	T	A	T	N	T	T	T	C	T	T	A	A	T	A	T	C	G	T	T	T	T	C	T	G	G	T	T	T	T	T	T	T
T	G	T	G	T	T	T	T	T	T	G	G	T	G	T	T	T	T	T	G	T	N	T	T	T	A	T	T	G	G	T	T	T	A	A	T	T	T	T	A	G	T	A	T	T	T	T	T	T	T
T	C	T	G	G	T	G	G	T	T	G	G	T	G	G	A	T	G	G	A	T	N	G	G	G	T	G	T	A	A	G	T	T	A	G	G	G	T	T	C	G	C	G	T	G	G	T	T	T	G
C	C	C	C	G	C	A	G	G	T	C	C	C	C	G	T	C	G	G	G	T	N	G	G	G	T	G	T	G	T	G	T	C	G	A	G	G	C	C	A	C	A	A	T	G	G	T	T	T	G
T	A	T	A	C	T	A	C	G	T	A	A	T	A	C	T	T	C	C	A	G	N	C	C	C	A	C	T	A	C	C	C	T	T	T	C	C	T	T	A	A	A	T	T	C	C	T	T	C	C
G	T	G	T	A	G	G	A	T	C	T	T	G	T	A	T	G	A	A	T	T	N	A	A	A	T	A	C	T	G	A	A	G	G	C	A	A	G	G	G	T	C	C	C	A	A	C	C	T	A
C	T	C	C	T	C	A	T	G	T	C	C	C	C	T	T	C	T	T	C	G	N	T	T	T	T	T	T	C	C	T	C	C	C	G	T	T	C	C	T	C	A	G	T	T	T	T	T	G	T
T	A	T	T	C	T	G	C	A	G	T	T	T	T	C	G	T	C	C	G	G	N	C	C	C	T	C	G	G	C	C	A	T	T	C	C	N	T	T	G	T	T	C	G	C	C	G	G	C	C
T	T	T	T	T	T	A	T	C	C	T	T	T	T	T	G	T	T	T	C	A	N	T	T	T	T	T	C	C	A	T	G	T	T	C	T	T	T	T	C	T	C	C	C	T	T	C	C	T	T
C	T	C	T	T	C	T	T	T	T	T	T	C	T	T	C	C	T	T	C	A	N	T	T	T	G	T	T	C	T	T	T	C	T	A	T	T	C	C	T	T	A	A	T	T	T	T	T	T	T
C	T	C	T	T	C	C	T	T	T	T	T	C	T	T	A	C	T	T	A	A	N	T	T	T	G	T	T	A	T	T	A	C	T	T	T	T	C	C	T	T	A	T	T	T	T	T	T	C	T
A	T	A	T	T	A	G	T	T	C	T	T	A	T	T	T	A	T	T	T	C	N	T	T	T	C	T	C	T	A	T	T	A	G	T	T	T	A	A	T	T	T	T	C	T	T	C	C	C	T
C	G	C	C	T	C	C	T	A	C	C	C	C	C	T	C	C	T	T	T	T	N	T	T	T	A	T	C	T	T	T	T	C	T	A	T	T	C	C	T	C	A	A	C	T	T	C	C	A	T
A	G	A	T	C	A	C	C	A	A	T	T	A	T	C	T	A	C	C	A	G	N	C	C	C	T	C	A	A	T	C	C	A	G	T	C	C	A	A	G	T	T	T	A	C	C	A	A	C	C
A	C	A	G	T	A	A	T	A	C	G	G	A	G	T	T	A	T	T	T	T	N	T	T	T	C	T	C	T	T	T	A	A	G	T	T	T	A	A	T	G	T	T	C	T	T	C	C	A	T
G	A	G	C	G	G	T	G	C	A	C	C	G	C	G	T	G	G	G	T	G	N	G	G	G	T	G	A	T	T	G	C	G	A	T	G	G	G	G	G	C	G	T	A	G	G	A	A	A	G
T	T	T	T	C	T	T	C	T	A	T	T	T	T	C	T	T	C	C	T	A	N	C	C	C	T	C	A	T	G	C	T	T	A	T	C	C	T	T	G	T	T	T	A	C	C	A	A	G	C
G	C	G	T	T	G	A	T	T	G	T	T	G	T	T	T	G	T	T	T	A	N	T	T	T	T	T	G	T	G	T	G	G	A	G	T	T	G	G	A	T	T	G	G	T	T	G	G	T	T
C	T	C	C	T	C	T	T	A	T	C	C	C	C	T	C	C	T	T	G	A	N	T	T	T	T	T	T	G	C	T	A	C	C	G	T	T	C	C	A	C	G	G	T	T	T	T	T	G	T
T	T	T	C	C	T	T	C	A	G	C	C	T	C	C	T	T	C	C	G	G	N	C	C	C	T	C	G	G	A	C	G	T	T	C	C	C	T	T	A	C	G	C	G	C	C	G	G	C	C
T	T	T	A	C	T	T	C	T	C	A	A	T	A	C	G	T	C	C	C	G	N	C	C	C	C	C	C	C	T	C	A	T	G	A	C	C	T	T	C	A	T	A	C	C	C	C	C	T	C
T	T	T	C	A	T	T	A	G	T	C	C	T	C	A	C	T	A	A	A	T	N	A	A	A	T	A	T	A	C	A	C	T	T	T	A	A	T	T	T	C	G	T	T	A	A	T	T	T	A
T	T	T	A	C	T	G	C	A	T	A	A	T	A	C	T	T	C	C	T	T	N	C	C	C	G	C	T	T	T	C	T	T	G	C	C	C	T	T	G	A	A	C	T	C	C	T	T	T	C
G	C	G	A	A	G	G	A	A	T	A	A	G	A	A	T	G	A	A	C	T	N	A	A	A	C	A	T	C	T	A	C	G	A	T	A	A	G	G	T	A	C	T	T	A	A	T	T	T	A
T	T	T	G	A	T	C	A	G	T	G	G	T	G	A	C	T	A	A	T	G	N	A	A	A	T	A	T	T	T	A	A	T	A	T	A	A	T	T	G	G	T	T	T	A	A	T	T	G	A
G	G	G	T	G	G	A	G	A	G	T	T	G	T	G	C	G	G	G	T	G	N	G	G	G	T	G	G	T	T	G	T	G	A	T	G	G	G	G	A	T	T	T	G	G	G	G	G	T	G
G	C	G	G	T	G	T	T	G	T	G	G	G	G	T	A	G	T	T	T	A	N	T	T	T	C	T	T	T	T	T	T	G	G	T	T	T	G	G	A	G	T	T	T	T	T	T	T	G	T
A	T	A	C	G	A	C	G	A	G	C	C	A	C	G	C	A	G	G	T	T	N	G	G	G	C	G	G	T	C	G	G	A	G	T	G	G	A	A	A	C	A	T	G	G	G	G	G	G	G
A	T	A	T	C	A	T	C	T	G	T	T	A	T	C	A	A	C	C	T	T	N	C	C	C	A	C	G	T	T	C	A	A	T	C	C	C	A	A	G	T	A	C	G	C	C	G	G	A	C
A	C	A	T	T	A	T	T	C	A	T	T	A	T	T	A	A	T	T	C	A	N	T	T	T	C	T	A	C	G	T	T	A	T	T	T	T	A	A	G	T	A	T	A	T	T	A	A	A	T
C	C	C	T	T	C	T	T	G	A	T	T	C	T	T	G	C	T	T	T	T	N	T	T	T	A	T	A	T	C	T	G	C	T	G	T	T	C	C	T	T	C	G	A	T	T	A	A	A	T
T	A	T	T	T	T	T	T	C	A	T	T	T	T	T	T	T	T	T	G	A	N	T	T	T	A	T	A	G	T	T	C	T	G	C	T	T	T	T	T	T	T	C	A	T	T	A	A	C	T
G	C	G	G	T	G	T	T	C	C	G	G	G	G	T	G	G	T	T	C	A	N	T	T	T	G	T	C	C	T	T	T	G	G	T	T	T	G	G	T	G	T	T	C	T	T	C	C	T	T
T	A	T	T	G	T	C	G	A	T	T	T	T	T	G	C	T	G	G	T	A	N	G	G	G	T	G	T	T	C	G	A	T	A	T	G	G	T	T	G	T	A	T	T	G	G	T	T	G	G
G	A	G	G	T	G	T	T	T	G	G	G	G	G	T	T	G	T	T	T	G	N	T	T	T	G	T	G	T	C	T	T	G	T	C	T	T	G	G	G	G	A	C	G	T	T	G	G	T	T
A	G	A	G	G	A	G	G	T	T	G	G	A	G	G	T	A	G	G	C	C	N	G	G	G	C	G	T	C	A	G	G	A	T	C	G	G	A	A	A	G	T	C	T	G	G	T	T	G	G
A	T	A	A	G	A	C	G	A	G	A	A	A	A	G	T	A	G	G	C	A	N	G	G	G	T	G	G	C	C	G	A	A	A	A	G	G	A	A	T	A	G	A	G	G	G	G	G	A	G
A	G	A	A	A	A	T	A	T	A	A	A	A	A	A	T	A	A	A	A	T	N	A	A	A	T	A	A	A	A	A	T	A	T	C	A	A	A	A	T	A	A	C	A	A	A	A	A	A	A
G	C	G	A	A	G	T	A	T	A	A	A	G	A	A	G	G	A	A	C	T	N	A	A	A	T	A	A	C	A	A	G	G	A	A	A	A	G	G	A	A	A	A	A	A	A	A	A	A	A
G	T	G	C	A	G	C	A	T	A	C	C	G	C	A	T	G	A	A	A	C	N	A	A	A	T	A	A	A	G	A	T	G	A	A	A	A	G	G	T	C	G	A	A	A	A	A	A	G	A
T	T	T	T	C	T	C	C	T	G	T	T	T	T	C	G	T	C	C	A	A	N	C	C	C	G	C	G	A	T	C	T	T	A	G	C	C	T	T	A	T	A	G	G	C	C	G	G	G	C
T	T	T	G	T	T	A	T	G	G	G	G	T	G	T	G	T	T	T	G	A	N	T	T	T	T	T	G	G	G	T	C	T	G	T	T	T	T	T	A	G	G	T	G	T	T	G	G	T	T
T	T	T	T	G	T	C	G	G	T	T	T	T	T	G	A	T	G	G	T	A	N	G	G	G	G	G	T	T	C	G	A	T	C	G	G	G	T	T	A	T	A	G	T	G	G	T	T	T	G
G	G	G	G	T	G	A	T	C	T	G	G	G	G	T	A	G	T	T	G	C	N	T	T	T	G	T	T	G	T	T	C	G	A	C	T	T	G	G	G	G	T	C	T	T	T	T	T	T	T
G	T	G	A	G	G	A	G	A	T	A	A	G	A	G	A	G	G	G	C	A	N	G	G	G	A	G	T	C	T	G	A	G	T	T	G	G	G	G	C	A	C	T	T	G	G	T	T	G	G
A	G	A	A	A	A	G	A	T	G	A	A	A	A	A	C	A	A	A	T	A	N	A	A	A	A	A	G	T	T	A	T	A	T	T	A	A	A	A	A	A	G	T	G	A	A	G	G	G	A
T	G	T	A	A	T	T	A	C	G	A	A	T	A	A	T	T	A	A	T	A	N	A	A	A	A	A	G	T	T	A	C	T	C	T	A	A	T	T	T	A	C	T	G	A	A	G	G	A	A
T	A	T	G	A	T	G	A	T	A	G	G	T	G	A	G	T	A	A	T	T	N	A	A	A	C	A	A	T	G	A	T	T	A	T	A	A	T	T	T	G	C	T	A	A	A	A	A	T	A
A	A	A	G	G	A	C	G	T	T	G	G	A	G	G	T	A	G	G	T	T	N	G	G	G	T	G	T	T	T	G	G	A	A	G	G	G	A	A	C	G	A	G	T	G	G	T	T	T	G
T	A	T	T	G	T	T	G	T	T	T	T	T	T	G	G	T	G	G	G	G	N	G	G	G	G	G	T	G	G	G	A	T	A	T	G	G	T	T	A	T	T	T	T	G	G	T	T	A	G
A	C	A	T	T	A	T	T	T	A	T	T	A	T	T	A	A	T	T	T	T	N	T	T	T	T	T	A	T	G	T	T	A	C	G	T	T	A	A	A	T	T	G	A	T	T	A	A	T	T
A	T	A	T	T	A	T	T	T	T	T	T	A	T	T	A	A	T	T	G	T	N	T	T	T	G	T	T	G	A	T	T	A	A	G	T	T	A	A	A	T	A	G	T	T	T	T	T	A	T
A	G	A	G	T	A	T	T	C	A	G	G	A	G	T	A	A	T	T	G	G	N	T	T	T	A	T	A	G	A	T	T	A	A	A	T	T	A	A	C	G	T	A	A	T	T	A	A	A	T
G	T	G	G	G	G	G	G	T	A	G	G	G	G	G	G	G	G	G	A	A	N	G	G	G	A	G	A	A	A	G	G	G	A	A	G	G	G	G	A	G	T	A	A	G	G	A	A	A	G
C	G	C	A	G	C	T	G	G	A	A	A	C	A	G	G	C	G	G	A	A	N	G	G	G	A	G	A	A	C	G	G	C	T	A	G	G	C	C	A	A	T	A	A	G	G	A	A	G	G
A	A	A	T	A	A	G	A	C	G	T	T	A	T	A	T	A	A	A	A	T	N	A	A	A	G	A	G	A	T	A	C	A	T	C	A	A	A	A	A	T	T	C	G	A	A	G	G	C	A
T	A	T	T	T	T	G	T	T	C	T	T	T	T	T	T	T	T	T	C	C	N	T	T	T	G	T	C	C	G	T	T	T	G	T	T	T	T	T	T	T	G	T	C	T	T	C	C	A	T
T	A	T	A	T	T	A	T	T	A	A	A	T	A	T	T	T	T	T	T	C	N	T	T	T	T	T	A	T	T	T	A	T	T	G	T	T	T	T	T	A	G	G	A	T	T	A	A	T	T
C	G	C	T	A	C	A	A	C	T	T	T	C	T	A	G	C	A	A	G	T	N	A	A	A	T	A	T	G	G	A	C	C	T	T	A	A	C	C	G	T	C	T	T	A	A	T	T	T	A
A	G	A	A	T	A	A	T	C	T	A	A	A	A	T	G	A	T	T	T	G	N	T	T	T	T	T	T	T	A	T	T	A	G	G	T	T	A	A	T	A	A	G	T	T	T	T	T	C	T
A	T	A	A	A	A	C	A	A	C	A	A	A	A	A	A	A	A	A	G	T	N	A	A	A	G	A	C	G	A	A	A	A	A	A	A	A	A	A	T	A	T	A	C	A	A	C	C	A	A
A	T	A	A	A	A	T	A	C	A	A	A	A	A	A	T	A	A	A	A	G	N	A	A	A	G	A	A	A	A	A	A	A	A	A	A	A	A	A	G	A	C	A	A	A	A	A	A	A	A
C	T	C	G	A	C	G	A	A	A	G	G	C	G	A	T	C	A	A	A	G	N	A	A	A	A	A	A	A	G	A	C	C	T	A	A	A	C	C	A	G	T	A	A	A	A	A	A	A	A
A	G	A	C	G	A	T	G	A	A	C	C	A	C	G	A	A	G	G	A	T	N	G	G	G	T	G	A	A	G	G	A	A	C	G	G	G	A	A	A	C	T	G	A	G	G	A	A	C	G
A	G	A	A	C	A	G	C	G	C	A	A	A	A	C	T	A	C	C	G	A	N	C	C	C	T	C	C	G	T	C	A	A	C	G	C	C	A	A	T	A	T	G	C	C	C	C	C	A	C
A	A	A	T	A	A	A	A	T	A	T	T	A	T	A	A	A	A	A	G	A	N	A	A	A	A	A	A	G	T	A	T	A	T	T	A	A	A	A	C	T	T	T	A	A	A	A	A	A	A
T	T	T	T	T	T	A	T	G	A	T	T	T	T	T	A	T	T	T	T	T	N	T	T	T	T	T	A	T	T	T	C	T	G	T	T	T	T	T	C	T	T	T	A	T	T	A	A	A	T
T	T	T	C	T	T	A	T	C	A	C	C	T	C	T	A	T	T	T	T	T	N	T	T	T	A	T	A	T	G	T	T	T	T	T	T	T	T	T	T	C	C	T	A	T	T	A	A	T	T
G	A	G	A	C	G	G	C	T	T	A	A	G	A	C	G	G	C	C	T	T	N	C	C	C	A	C	T	T	G	C	A	G	G	G	C	C	G	G	G	A	T	G	T	C	C	T	T	T	C
T	T	T	A	A	T	G	A	T	T	A	A	T	A	A	C	T	A	A	G	T	N	A	A	A	A	A	T	G	A	A	G	T	G	G	A	A	T	T	T	A	G	G	T	A	A	T	T	G	A
T	A	T	A	A	T	T	A	T	G	A	A	T	A	A	A	T	A	A	G	A	N	A	A	A	G	A	G	G	T	A	T	T	T	A	A	A	T	T	G	A	C	A	G	A	A	G	G	T	A
G	A	G	C	A	G	T	A	T	T	C	C	G	C	A	T	G	A	A	A	A	N	A	A	A	C	A	T	A	T	A	T	G	A	T	A	A	G	G	G	C	T	T	T	A	A	T	T	T	A
A	A	A	A	C	A	T	C	G	T	A	A	A	A	C	T	A	C	C	T	A	N	C	C	C	A	C	T	T	A	C	G	A	A	T	C	C	A	A	T	A	T	T	T	C	C	T	T	G	C
A	G	A	A	A	A	G	A	T	G	A	A	A	A	A	C	A	A	A	T	G	N	A	A	A	T	A	G	T	T	A	T	A	T	A	A	A	A	A	A	A	C	A	G	A	A	G	G	A	A
T	C	T	A	A	T	G	A	G	A	A	A	T	A	A	A	T	A	A	A	T	N	A	A	A	T	A	A	A	A	A	A	T	T	T	A	A	T	T	A	A	C	T	A	A	A	A	A	A	A
C	A	C	T	A	C	A	A	G	A	T	T	C	T	A	A	C	A	A	T	T	N	A	A	A	C	A	A	T	A	A	A	C	T	A	A	A	C	C	T	T	A	A	A	A	A	A	A	T	A
C	T	C	T	T	C	T	T	A	T	T	T	C	T	T	A	C	T	T	A	A	N	T	T	T	A	T	T	A	A	T	T	C	T	A	T	T	C	C	T	T	C	A	T	T	T	T	T	C	T
T	T	T	G	T	T	T	T	A	C	G	G	T	G	T	C	T	T	T	A	C	N	T	T	T	A	T	C	A	G	T	G	T	A	A	T	T	T	T	T	G	A	A	C	T	T	C	C	C	T
G	C	G	T	G	G	A	G	A	C	T	T	G	T	G	A	G	G	G	A	A	N	G	G	G	A	G	C	A	C	G	G	G	A	G	G	G	G	G	T	T	A	G	C	G	G	C	C	T	G
T	A	T	T	T	T	T	T	C	T	T	T	T	T	T	A	T	T	T	G	A	N	T	T	T	C	T	T	G	A	T	C	T	A	C	T	T	T	T	A	T	G	C	T	T	T	T	T	G	T
G	A	G	G	T	G	A	T	T	G	G	G	G	G	T	A	G	T	T	C	A	N	T	T	T	A	T	G	C	T	T	C	G	G	A	T	T	G	G	A	G	T	A	G	T	T	G	G	T	T
G	A	G	A	G	G	A	G	G	T	A	A	G	A	G	T	G	G	G	A	A	N	G	G	G	A	G	T	A	T	G	T	G	T	T	G	G	G	G	A	A	G	T	T	G	G	T	T	G	G
T	C	T	A	A	T	A	A	T	G	A	A	T	A	A	T	T	A	A	T	G	N	A	A	A	A	A	G	T	C	A	A	T	T	T	A	A	T	T	G	A	C	T	G	A	A	G	G	G	A
A	A	A	T	A	A	G	A	G	G	T	T	A	T	A	G	A	A	A	T	G	N	A	A	A	T	A	G	T	A	A	C	A	A	C	A	A	A	A	T	T	T	C	G	A	A	G	G	T	A
A	A	A	C	T	A	C	T	A	T	C	C	A	C	T	T	A	T	T	C	A	N	T	T	T	T	T	T	C	A	T	A	A	C	A	T	T	A	A	T	C	T	A	T	T	T	T	T	A	T
T	A	T	C	C	T	A	C	A	A	C	C	T	C	C	T	T	C	C	A	A	N	C	C	C	G	C	A	A	A	C	T	T	A	A	C	C	T	T	A	C	T	A	A	C	C	A	A	A	C
T	T	T	T	C	T	T	C	A	A	T	T	T	T	C	G	T	C	C	A	A	N	C	C	C	T	C	A	A	C	C	T	T	A	A	C	C	T	T	C	T	T	A	A	C	C	A	A	T	C
T	T	T	G	T	T	T	T	G	T	G	G	T	G	T	A	T	T	T	A	A	N	T	T	T	T	T	T	A	A	T	A	T	A	C	T	T	T	T	A	G	G	C	T	T	T	T	T	T	T
T	G	T	T	G	T	C	G	G	T	T	T	T	T	G	A	T	G	G	C	G	N	G	G	G	G	G	T	C	A	G	C	T	A	A	G	G	T	T	A	T	T	A	T	G	G	T	T	T	G
A	T	A	G	T	A	A	T	T	T	G	G	A	G	T	T	A	T	T	A	C	N	T	T	T	A	T	T	A	A	T	A	A	G	A	T	T	A	A	A	G	G	A	T	T	T	T	T	T	T
A	T	A	G	G	A	A	G	T	T	G	G	A	G	G	C	A	G	G	A	T	N	G	G	G	A	G	T	A	T	G	G	A	G	A	G	G	A	A	A	G	G	A	T	G	G	T	T	A	G
A	G	A	T	G	A	A	G	T	A	T	T	A	T	G	C	A	G	G	A	A	N	G	G	G	T	G	A	A	T	G	G	A	A	T	G	G	A	A	G	T	A	T	A	G	G	A	A	A	G
G	A	G	A	T	G	C	T	G	A	A	A	G	A	T	T	G	T	T	T	A	N	T	T	T	C	T	A	T	G	T	T	G	A	T	T	T	G	G	G	A	A	T	A	T	T	A	A	A	T
T	A	T	A	A	T	A	A	G	A	A	A	T	A	A	G	T	A	A	T	A	N	A	A	A	C	A	A	T	T	A	G	T	A	G	A	A	T	T	A	A	A	G	A	A	A	A	A	G	A
T	T	T	T	A	T	A	A	A	G	T	T	T	T	A	T	T	A	A	G	A	N	A	A	A	T	A	G	G	T	A	G	T	A	T	A	A	T	T	A	T	C	T	G	A	A	G	G	T	A
A	C	A	T	T	A	A	T	T	T	T	T	A	T	T	G	A	T	T	T	A	N	T	T	T	G	T	T	T	G	T	T	A	G	T	T	T	A	A	A	T	T	T	T	T	T	T	T	T	T
C	C	C	T	T	C	T	T	T	T	T	T	C	T	T	G	C	T	T	T	A	N	T	T	T	T	T	T	T	A	T	G	C	C	G	T	T	C	C	A	T	G	G	T	T	T	T	T	A	T
A	T	A	T	T	A	T	T	A	A	T	T	A	T	T	T	A	T	T	G	G	N	T	T	T	G	T	A	G	A	T	T	A	T	A	T	T	A	A	G	T	T	A	A	T	T	A	A	C	T
A	G	A	A	T	A	G	T	T	C	A	A	A	A	T	A	A	T	T	A	G	N	T	T	T	G	T	C	A	T	T	T	A	A	A	T	T	A	A	C	A	G	A	C	T	T	C	C	A	T
A	T	A	A	A	A	T	A	A	A	A	A	A	A	A	A	A	A	A	A	T	N	A	A	A	T	A	A	A	C	A	G	A	A	T	A	A	A	A	T	A	A	T	A	A	A	A	A	A	A
A	G	A	A	A	A	T	A	A	A	A	A	A	A	A	T	A	A	A	T	G	N	A	A	A	A	A	A	T	C	A	T	A	A	C	A	A	A	A	A	A	A	C	A	A	A	A	A	A	A
G	G	G	G	A	G	G	A	A	A	G	G	G	G	A	T	G	A	A	C	C	N	A	A	A	A	A	A	C	T	A	T	G	A	C	A	A	G	G	A	G	A	C	A	A	A	A	A	A	A
G	T	G	T	G	G	A	G	G	A	T	T	G	T	G	T	G	G	G	C	C	N	G	G	G	T	G	A	C	G	G	C	G	A	T	G	G	G	G	A	T	G	T	A	G	G	A	A	G	G
A	A	A	T	T	A	A	T	C	G	T	T	A	T	T	T	A	T	T	T	T	N	T	T	T	T	T	G	T	T	T	A	A	A	G	T	T	A	A	A	T	G	G	G	T	T	G	G	G	T
A	A	A	A	T	A	T	T	A	G	A	A	A	A	T	A	A	T	T	G	G	N	T	T	T	T	T	G	G	G	T	G	A	G	T	T	T	A	A	A	A	T	T	G	T	T	G	G	A	T
A	T	A	C	A	A	C	A	T	A	C	C	A	C	A	A	A	A	A	T	G	N	A	A	A	T	A	A	T	G	A	T	A	G	G	A	A	A	A	A	C	T	G	A	A	A	A	A	A	A
A	T	A	A	C	A	C	C	T	A	A	A	A	A	C	A	A	C	C	G	A	N	C	C	C	A	C	A	G	T	C	T	A	T	G	C	C	A	A	G	A	T	G	A	C	C	A	A	A	C
G	T	G	A	A	G	T	A	C	A	A	A	G	A	A	G	G	A	A	G	A	N	A	A	A	A	A	A	G	A	A	G	G	G	T	A	A	G	G	G	A	G	T	A	A	A	A	A	A	A
C	T	C	A	A	C	G	A	A	A	A	A	C	A	A	T	C	A	A	T	T	N	A	A	A	A	A	A	T	A	A	A	C	C	A	A	A	C	C	T	A	G	A	A	A	A	A	A	G	A
T	A	T	A	A	T	T	A	A	G	A	A	T	A	A	T	T	A	A	A	A	N	A	A	A	G	A	G	A	T	A	C	T	C	A	A	A	T	T	G	A	A	A	G	A	A	G	G	C	A
A	A	A	G	A	A	G	A	A	C	G	G	A	G	A	A	A	A	A	A	T	N	A	A	A	T	A	C	A	T	A	T	A	T	T	A	A	A	A	C	G	T	T	C	A	A	C	C	T	A
A	A	A	G	G	A	G	G	C	T	G	G	A	G	G	C	A	G	G	T	T	N	G	G	G	T	G	T	T	T	G	T	A	G	T	G	G	A	A	C	G	T	T	T	G	G	T	T	A	G
A	G	A	A	G	A	T	G	A	A	A	A	A	A	G	A	A	G	G	T	G	N	G	G	G	A	G	A	T	T	G	C	A	G	T	G	G	A	A	T	A	A	T	A	G	G	A	A	A	G
A	T	A	A	A	A	A	A	A	A	A	A	A	A	A	A	A	A	A	T	G	N	A	A	A	C	A	A	T	A	A	G	A	A	T	A	A	A	A	G	A	T	T	A	A	A	A	A	A	A
A	T	A	A	A	A	A	A	A	A	A	A	A	A	A	A	A	A	A	T	T	N	A	A	A	A	A	A	T	A	A	C	A	A	A	A	A	A	A	G	A	A	A	A	A	A	A	A	A	A
A	A	A	A	A	A	T	A	T	A	A	A	A	A	A	A	A	A	A	A	G	N	A	A	A	A	A	A	A	A	A	A	A	T	A	A	A	A	A	A	A	A	A	A	A	A	A	A	A	A
G	C	G	G	A	G	T	A	T	A	G	G	G	G	A	G	G	A	A	A	A	N	A	A	A	A	A	A	A	G	A	G	G	A	A	A	A	G	G	A	G	A	A	A	A	A	A	A	A	A
G	A	G	C	G	G	T	G	G	A	C	C	G	C	G	G	G	G	G	A	A	N	G	G	G	A	G	A	A	T	G	T	G	T	G	G	G	G	G	T	C	G	G	A	G	G	A	A	G	G
T	A	T	T	C	T	T	C	T	G	T	T	T	T	C	A	T	C	C	G	C	N	C	C	C	G	C	G	G	T	C	G	T	T	T	C	C	T	T	A	T	C	T	G	C	C	G	G	G	C
G	A	G	A	T	G	A	T	T	G	A	A	G	A	T	A	G	T	T	T	A	N	T	T	T	G	T	G	T	A	T	G	G	G	T	T	T	G	G	T	A	A	T	G	T	T	G	G	T	T
C	A	C	A	A	C	A	A	G	T	A	A	C	A	A	A	C	A	A	T	G	N	A	A	A	A	A	T	T	C	A	C	C	G	A	A	A	C	C	T	A	T	A	T	A	A	T	T	G	A
C	G	C	A	A	C	A	A	A	G	A	A	C	A	A	A	C	A	A	A	A	N	A	A	A	A	A	G	A	A	A	T	C	T	C	A	A	C	C	G	A	T	C	G	A	A	G	G	C	A
T	G	T	A	A	T	G	A	A	C	A	A	T	A	A	G	T	A	A	C	A	N	A	A	A	A	A	C	C	A	A	A	T	G	A	A	A	T	T	G	A	C	A	C	A	A	C	C	C	A
G	A	G	A	A	G	T	A	T	C	A	A	G	A	A	C	G	A	A	A	A	N	A	A	A	A	A	C	A	A	A	A	G	A	A	A	A	G	G	T	A	A	A	C	A	A	C	C	T	A
G	A	G	A	A	G	T	A	C	T	A	A	G	A	A	T	G	A	A	A	T	N	A	A	A	G	A	T	A	A	A	C	G	A	A	A	A	G	G	G	A	A	A	T	A	A	T	T	G	A
A	A	A	G	A	A	A	A	C	G	G	G	A	G	A	A	A	A	A	A	C	N	A	A	A	C	A	G	A	G	A	T	A	C	A	A	A	A	A	A	G	A	A	G	A	A	G	G	G	A
A	A	A	G	G	A	C	G	T	G	G	G	A	G	G	A	A	G	G	A	A	N	G	G	G	T	G	G	A	G	G	A	A	A	G	G	G	A	A	A	G	C	G	G	G	G	G	G	A	G
T	G	T	T	G	T	A	G	G	A	T	T	T	T	G	A	T	G	G	G	A	N	G	G	G	A	G	A	G	A	G	A	T	G	G	G	G	T	T	C	T	A	G	A	G	G	A	A	A	G
A	C	A	G	T	A	A	T	T	A	G	G	A	G	T	A	A	T	T	G	T	N	T	T	T	A	T	A	G	A	T	C	A	A	A	T	T	A	A	A	G	A	A	A	T	T	A	A	T	T
T	T	T	C	G	T	A	G	G	T	C	C	T	C	G	A	T	G	G	A	A	N	G	G	G	A	G	T	A	A	G	A	T	A	A	G	G	T	T	G	C	A	A	T	G	G	T	T	A	G
T	A	T	C	C	T	A	C	G	A	C	C	T	C	C	A	T	C	C	A	C	N	C	C	C	A	C	A	A	A	C	T	T	A	A	C	C	T	T	A	C	T	A	A	C	C	A	A	T	C
G	A	G	T	C	G	G	C	T	T	T	T	G	T	C	G	G	C	C	A	T	N	C	C	C	A	C	T	A	G	C	C	G	T	A	C	C	G	G	A	T	T	A	T	C	C	T	T	T	C
G	A	G	G	T	G	G	T	A	T	G	G	G	G	T	G	G	T	T	A	G	N	T	T	T	A	T	T	A	C	T	T	G	C	G	T	T	G	G	A	G	G	G	T	T	T	T	T	G	T
T	A	T	G	G	T	A	G	A	G	G	G	T	G	G	T	T	G	G	G	A	N	G	G	G	G	G	G	G	T	G	T	T	A	C	G	G	T	T	T	G	T	C	G	G	G	G	G	G	G
G	A	G	A	G	G	A	G	T	G	A	A	G	A	G	G	G	G	G	C	G	N	G	G	G	G	G	G	C	A	G	T	G	A	T	G	G	G	G	C	A	T	T	G	G	G	G	G	T	G
A	A	A	A	A	A	A	A	T	T	A	A	A	A	A	C	A	A	A	T	T	N	A	A	A	T	A	T	T	A	A	G	A	T	A	A	A	A	A	A	A	G	A	T	A	A	T	T	G	A
A	G	A	T	A	A	A	A	T	G	T	T	A	T	A	C	A	A	A	A	C	N	A	A	A	G	A	G	A	A	A	G	A	A	A	A	A	A	A	A	T	A	A	G	A	A	G	G	A	A
C	G	C	A	T	C	G	T	T	A	A	A	C	A	T	T	C	T	T	A	C	N	T	T	T	C	T	A	A	A	T	C	C	C	A	T	T	C	C	T	A	A	A	A	T	T	A	A	A	T
A	T	A	T	A	A	C	A	A	A	T	T	A	T	A	G	A	A	A	A	T	N	A	A	A	C	A	A	A	A	A	A	A	T	A	A	A	A	A	A	T	T	A	A	A	A	A	A	C	A
G	G	G	T	T	G	T	T	A	C	T	T	G	T	T	G	G	T	T	A	C	N	T	T	T	T	T	C	A	A	T	C	G	G	A	T	T	G	G	C	T	C	A	C	T	T	C	C	A	T
A	C	A	G	T	A	A	T	A	A	G	G	A	G	T	A	A	T	T	A	T	N	T	T	T	G	T	A	A	G	T	T	A	A	A	T	T	A	A	T	G	C	A	A	T	T	A	A	G	T
A	C	A	G	G	A	A	G	G	G	G	G	A	G	G	A	A	G	G	A	T	N	G	G	G	G	G	G	A	G	G	G	A	G	G	G	G	A	A	G	G	T	G	G	G	G	G	G	A	G
A	T	A	T	G	A	A	G	T	A	T	T	A	T	G	T	A	G	G	G	T	N	G	G	G	A	G	A	G	T	G	T	A	T	G	G	G	A	A	A	T	G	G	A	G	G	A	A	A	G
T	G	T	G	T	T	A	T	T	A	G	G	T	G	T	A	T	T	T	G	A	N	T	T	T	A	T	A	G	G	T	T	T	C	T	T	T	T	T	G	G	T	T	A	T	T	A	A	A	T
C	G	C	A	G	C	A	G	A	A	A	A	C	A	G	T	C	G	G	T	T	N	G	G	G	T	G	A	T	C	G	T	C	C	G	G	G	C	C	T	A	G	G	A	G	G	A	A	T	G
A	A	A	A	A	A	A	A	C	T	A	A	A	A	A	T	A	A	A	G	G	N	A	A	A	A	A	T	G	C	A	A	A	T	C	A	A	A	A	C	A	G	C	T	A	A	T	T	C	A
A	A	A	C	A	A	G	A	A	C	C	C	A	C	A	G	A	A	A	C	C	N	A	A	A	T	A	C	C	T	A	T	A	C	C	A	A	A	A	C	C	T	C	C	A	A	C	C	A	A
T	T	T	A	C	T	G	C	A	A	A	A	T	A	C	G	T	C	C	C	A	N	C	C	C	T	C	A	C	G	C	G	T	T	T	C	C	T	T	T	A	A	T	A	C	C	A	A	A	C
A	A	A	G	A	A	T	A	A	A	G	G	A	G	A	T	A	A	A	T	T	N	A	A	A	G	A	A	T	G	A	A	A	T	G	A	A	A	A	C	G	A	G	A	A	A	A	A	T	A
C	T	C	A	G	C	G	G	A	T	A	A	C	A	G	G	C	G	G	G	T	N	G	G	G	G	G	T	G	A	G	A	C	T	G	G	G	C	C	T	A	T	G	T	G	G	T	T	A	G
T	T	T	A	A	T	C	A	G	A	A	A	T	A	A	A	T	A	A	G	T	N	A	A	A	T	A	A	G	A	A	A	T	A	A	A	A	T	T	T	A	T	A	A	A	A	A	A	C	A
G	G	G	A	A	G	C	A	G	C	A	A	G	A	A	A	G	A	A	A	G	N	A	A	A	G	A	C	A	T	A	A	G	T	A	A	A	G	G	T	A	T	A	C	A	A	C	C	T	A
A	G	A	T	A	A	T	A	A	T	T	T	A	T	A	C	A	A	A	A	C	N	A	A	A	A	A	T	A	A	A	A	A	G	T	A	A	A	A	A	T	T	T	T	A	A	T	T	G	A
G	T	G	C	T	G	G	T	A	G	C	C	G	C	T	A	G	T	T	T	A	N	T	T	T	A	T	G	T	T	T	C	G	C	A	T	T	G	G	T	C	A	A	G	T	T	G	G	A	T
T	G	T	A	C	T	G	C	A	A	A	A	T	A	C	G	T	C	C	A	T	N	C	C	C	C	C	A	A	T	C	T	T	A	T	C	C	T	T	G	A	A	T	A	C	C	A	A	G	C
C	A	C	A	A	C	A	A	A	G	A	A	C	A	A	A	C	A	A	T	C	N	A	A	A	A	A	G	T	G	A	C	C	T	T	A	A	C	C	C	A	A	T	G	A	A	G	G	T	A
C	A	C	T	A	C	A	A	G	T	T	T	C	T	A	A	C	A	A	T	A	N	A	A	A	G	A	T	T	G	A	A	C	T	G	A	A	C	C	A	T	G	G	T	A	A	T	T	C	A
T	C	T	A	T	T	T	T	C	C	A	A	T	A	T	A	T	T	T	G	G	N	T	T	T	A	T	C	G	T	T	A	T	T	G	T	T	T	T	T	A	T	G	C	T	T	C	C	C	T
C	A	C	C	A	C	A	A	T	C	C	C	C	C	A	T	C	A	A	G	A	N	A	A	A	A	A	C	G	G	A	A	C	G	T	A	A	C	C	T	C	T	T	C	A	A	C	C	T	A
T	G	T	T	C	T	T	C	A	T	T	T	T	T	C	C	T	C	C	T	G	N	C	C	C	A	C	T	T	A	C	C	T	C	G	C	C	T	T	T	T	A	G	T	C	C	T	T	C	C
T	A	T	G	T	T	T	T	A	C	G	G	T	G	T	A	T	T	T	G	G	N	T	T	T	T	T	C	G	A	T	C	T	A	A	T	T	T	T	G	G	C	A	C	T	T	C	C	T	T
T	A	T	A	G	T	G	G	A	T	A	A	T	A	G	A	T	G	G	A	C	N	G	G	G	C	G	T	A	C	G	C	T	T	A	G	G	T	T	C	A	A	A	T	G	G	T	T	T	G
A	A	A	G	A	A	G	A	A	T	G	G	A	G	A	T	A	A	A	A	T	N	A	A	A	A	A	T	A	A	A	G	A	C	C	A	A	A	A	A	G	A	C	T	A	A	T	T	T	A
T	T	T	T	G	T	T	G	A	T	T	T	T	T	G	A	T	G	G	C	G	N	G	G	G	A	G	T	C	G	G	T	T	A	A	G	G	T	T	T	T	A	A	T	G	G	T	T	A	G
G	C	G	C	T	G	G	T	A	A	C	C	G	C	T	C	G	T	T	A	C	N	T	T	T	T	T	A	A	A	T	C	G	G	G	T	T	G	G	C	C	A	G	A	T	T	A	A	T	T
C	A	C	C	C	C	A	C	G	T	C	C	C	C	C	T	C	C	C	G	T	N	C	C	C	A	C	T	G	A	C	C	C	A	A	C	C	C	C	A	C	G	A	T	C	C	T	T	G	C
A	A	A	T	C	A	A	C	G	G	T	T	A	T	C	G	A	C	C	A	C	N	C	C	C	C	C	G	A	A	C	T	A	G	A	C	C	A	A	G	T	G	A	G	C	C	G	G	C	C
T	T	T	C	T	T	C	T	T	C	C	C	T	C	T	A	T	T	T	A	G	N	T	T	T	T	T	C	A	T	T	T	T	G	A	T	T	T	T	A	C	A	A	C	T	T	C	C	A	T
T	A	T	T	C	T	A	C	G	A	T	T	T	T	C	G	T	C	C	A	T	N	C	C	C	G	C	A	A	C	C	G	T	C	T	C	C	T	T	G	T	A	T	A	C	C	A	A	T	C
T	C	T	T	T	T	G	T	C	T	T	T	T	T	T	T	T	T	T	T	G	N	T	T	T	A	T	T	T	A	T	A	T	T	C	T	T	T	T	G	T	A	C	T	T	T	T	T	T	T
G	T	G	T	T	G	A	T	C	T	T	T	G	T	T	C	G	T	T	C	T	N	T	T	T	G	T	T	C	A	T	T	G	G	A	T	T	G	G	C	T	A	A	T	T	T	T	T	T	T
C	G	C	A	T	C	A	T	T	T	A	A	C	A	T	C	C	T	T	A	T	N	T	T	T	T	T	T	A	T	T	T	C	C	A	T	T	C	C	T	A	G	A	T	T	T	T	T	G	T
A	A	A	T	A	A	A	A	G	G	T	T	A	T	A	T	A	A	A	A	G	N	A	A	A	C	A	G	A	A	A	G	A	T	T	A	A	A	A	G	T	C	T	G	A	A	G	G	C	A
T	G	T	G	T	T	T	T	G	C	G	G	T	G	T	C	T	T	T	T	T	N	T	T	T	C	T	C	T	C	T	G	T	C	A	T	T	T	T	C	G	T	A	C	T	T	C	C	A	T
C	T	C	C	G	C	C	G	A	A	C	C	C	C	G	T	C	G	G	A	A	N	G	G	G	T	G	A	A	T	G	C	C	G	C	G	G	C	C	T	C	A	C	A	G	G	A	A	T	G
A	C	A	A	C	A	A	C	A	T	A	A	A	A	C	T	A	C	C	C	C	N	C	C	C	C	C	T	C	G	C	T	A	T	T	C	C	A	A	C	A	A	T	T	C	C	T	T	C	C
G	C	G	T	A	G	A	A	T	C	T	T	G	T	A	T	G	A	A	T	G	N	A	A	A	T	A	C	T	A	A	T	G	G	G	A	A	G	G	G	T	A	G	C	A	A	C	C	A	A
A	T	A	T	T	A	T	T	A	A	T	T	A	T	T	A	A	T	T	G	A	N	T	T	T	T	T	A	G	G	T	G	A	T	A	T	T	A	A	T	T	A	A	A	T	T	A	A	G	T
G	C	G	T	T	G	A	T	T	G	T	T	G	T	T	T	G	T	T	A	T	N	T	T	T	T	T	G	A	T	T	A	G	T	G	T	T	G	G	G	T	A	G	G	T	T	G	G	A	T
G	T	G	G	T	G	C	T	T	A	G	G	G	G	T	G	G	T	T	G	C	N	T	T	T	A	T	A	G	C	T	A	G	G	T	T	T	G	G	T	G	A	T	A	T	T	A	A	G	T
C	T	C	C	G	C	T	G	G	G	C	C	C	C	G	C	C	G	G	T	A	N	G	G	G	T	G	G	T	C	G	G	C	T	C	G	G	C	C	T	C	G	C	G	G	G	G	G	G	G
T	T	T	A	C	T	G	C	G	G	A	A	T	A	C	A	T	C	C	C	A	N	C	C	C	G	C	G	C	T	C	A	T	A	C	C	C	T	T	G	A	G	C	G	C	C	G	G	C	C
G	A	G	T	A	G	A	A	T	C	T	T	G	T	A	T	G	A	A	C	T	N	A	A	A	C	A	C	C	C	A	G	G	C	T	A	A	G	G	T	T	T	T	C	A	A	C	C	T	A
C	T	C	C	T	C	G	T	G	T	C	C	C	C	T	T	C	T	T	T	T	N	T	T	T	A	T	T	T	T	T	A	C	G	C	T	T	C	C	A	C	G	C	T	T	T	T	T	G	T
T	G	T	A	C	T	T	C	A	G	A	A	T	A	C	T	T	C	C	C	T	N	C	C	C	T	C	G	C	T	C	A	T	A	T	C	C	T	T	C	A	C	T	G	C	C	G	G	C	C
C	C	C	G	A	C	C	A	A	C	G	G	C	G	A	G	C	A	A	T	T	N	A	A	A	T	A	C	T	T	A	G	C	T	T	A	A	C	C	G	G	C	T	C	A	A	C	C	T	A
G	A	G	A	G	G	C	G	C	T	A	A	G	A	G	C	G	G	G	T	C	N	G	G	G	T	G	T	T	A	G	T	G	C	T	G	G	G	G	A	A	T	T	T	G	G	T	T	C	G
T	T	T	G	A	T	T	A	A	C	G	G	T	G	A	A	T	A	A	T	T	N	A	A	A	G	A	C	T	T	A	T	T	A	A	A	A	T	T	T	G	G	A	C	A	A	C	C	G	A
G	T	G	G	G	G	C	G	G	G	G	G	G	G	G	T	G	G	G	A	C	N	G	G	G	C	G	G	A	G	G	T	G	A	T	G	G	G	G	C	G	G	T	G	G	G	G	G	T	G
T	T	T	C	G	T	T	G	A	T	C	C	T	C	G	C	T	G	G	T	C	N	G	G	G	A	G	T	T	C	G	A	T	T	G	G	G	T	T	A	C	A	G	T	G	G	T	T	G	G
T	G	T	T	C	T	T	C	A	G	T	T	T	T	C	A	T	C	C	G	C	N	C	C	C	T	C	G	G	A	C	A	T	T	C	C	C	T	T	A	T	A	C	G	C	C	G	G	T	C
G	C	G	G	T	G	T	T	A	T	G	G	G	G	T	G	G	T	T	C	G	N	T	T	T	C	T	T	C	T	T	G	G	T	A	T	T	G	G	T	G	T	A	T	T	T	T	T	T	T
T	A	T	C	G	T	A	G	T	T	C	C	T	C	G	A	T	G	G	A	C	N	G	G	G	A	G	T	A	T	G	G	T	T	T	G	G	T	T	T	C	A	T	T	G	G	T	T	G	G
A	T	A	T	C	A	T	C	C	G	T	T	A	T	C	G	A	C	C	T	A	N	C	C	C	G	C	G	T	T	C	A	A	C	T	C	C	A	A	T	T	T	T	G	C	C	G	G	T	C
C	C	C	C	T	C	G	T	A	T	C	C	C	C	T	G	C	T	T	T	C	N	T	T	T	A	T	T	T	G	T	A	C	T	T	T	T	C	C	T	C	T	T	T	T	T	T	T	A	T
G	A	G	G	C	G	C	C	A	A	G	G	G	G	C	C	G	C	C	T	T	N	C	C	C	G	C	A	T	C	C	G	G	C	G	C	C	G	G	C	G	G	G	A	C	C	A	A	C	C
A	G	A	T	G	A	A	G	T	C	T	T	A	T	G	T	A	G	G	G	C	N	G	G	G	G	G	C	G	A	G	G	A	C	C	G	G	A	A	T	T	G	C	C	G	G	C	C	G	G
T	A	T	G	T	T	T	T	A	G	G	G	T	G	T	G	T	T	T	C	T	N	T	T	T	C	T	G	C	T	T	T	T	C	A	T	T	T	T	C	G	T	A	G	T	T	G	G	A	T
C	G	C	T	G	C	T	G	C	A	T	T	C	T	G	C	C	G	G	A	T	N	G	G	G	T	G	A	A	C	G	G	C	G	T	G	G	C	C	C	T	G	T	A	G	G	A	A	T	G
A	G	A	T	T	A	T	T	T	T	T	T	A	T	T	T	A	T	T	T	G	N	T	T	T	G	T	T	T	A	T	T	A	C	C	T	T	A	A	C	T	A	C	T	T	T	T	T	C	T
A	C	A	G	T	A	G	T	G	C	G	G	A	G	T	C	A	T	T	C	A	N	T	T	T	C	T	C	C	G	T	A	A	A	A	T	T	A	A	G	G	A	A	C	T	T	C	C	A	T
T	T	T	T	G	T	C	G	A	A	T	T	T	T	G	G	T	G	G	A	A	N	G	G	G	T	G	A	A	A	G	G	T	C	G	G	G	T	T	C	T	C	G	A	G	G	A	A	A	G
T	G	T	A	T	T	A	T	G	A	A	A	T	A	T	T	T	T	T	G	A	N	T	T	T	C	T	A	G	G	T	A	T	T	A	T	T	T	T	A	A	A	A	A	T	T	A	A	T	T
T	C	T	C	A	T	T	A	T	T	C	C	T	C	A	G	T	A	A	A	C	N	A	A	A	G	A	T	A	G	A	G	T	C	G	A	A	T	T	C	C	G	G	T	A	A	T	T	T	A
T	T	T	G	C	T	C	C	C	T	G	G	T	G	C	T	T	C	C	G	T	N	C	C	C	T	C	T	G	C	C	T	T	T	G	C	C	T	T	T	G	A	G	T	C	C	T	T	T	C
C	C	C	A	G	C	A	G	C	T	A	A	C	A	G	T	C	G	G	G	G	N	G	G	G	G	G	T	G	T	G	T	C	T	C	G	G	C	C	C	A	A	C	T	G	G	T	T	T	G
T	G	T	T	A	T	G	A	T	T	T	T	T	T	A	G	T	A	A	C	C	N	A	A	A	T	A	T	C	G	A	T	T	G	T	A	A	T	T	T	T	A	T	T	A	A	T	T	C	A
C	T	C	C	T	C	A	T	C	C	C	C	C	C	T	T	C	T	T	T	T	N	T	T	T	T	T	C	T	C	T	C	C	A	G	T	T	C	C	T	C	T	G	C	T	T	C	C	T	T
C	G	C	A	C	C	G	C	T	T	A	A	C	A	C	A	C	C	C	G	C	N	C	C	C	G	C	T	G	T	C	T	C	A	C	C	C	C	C	G	A	C	C	T	C	C	T	T	C	C
C	T	C	A	A	C	G	A	T	C	A	A	C	A	A	C	C	A	A	C	A	N	A	A	A	T	A	C	C	C	A	T	C	A	T	A	A	C	C	A	A	A	T	C	A	A	C	C	C	A
G	T	G	T	A	G	C	A	T	C	T	T	G	T	A	G	G	A	A	T	A	N	A	A	A	A	A	C	T	G	A	A	G	C	C	A	A	G	G	A	T	A	C	C	A	A	C	C	C	A
C	G	C	T	T	C	T	T	A	C	T	T	C	T	T	A	C	T	T	C	A	N	T	T	T	C	T	C	C	T	T	G	C	T	G	T	T	C	C	A	T	T	G	C	T	T	C	C	G	T
A	T	A	T	T	A	G	T	T	G	T	T	A	T	T	T	A	T	T	G	A	N	T	T	T	G	T	G	G	G	T	A	A	G	T	T	T	A	A	C	T	A	T	G	T	T	G	G	C	T
C	A	C	T	T	C	C	T	G	C	T	T	C	T	T	C	C	T	T	T	T	N	T	T	T	A	T	C	T	T	T	G	C	C	G	T	T	C	C	T	T	C	G	C	T	T	C	C	A	T
T	C	T	C	T	T	T	T	C	A	C	C	T	C	T	A	T	T	T	G	T	N	T	T	T	T	T	A	G	T	T	A	T	T	T	T	T	T	T	G	C	T	T	A	T	T	A	A	C	T
C	G	C	T	C	C	C	C	A	C	T	T	C	T	C	A	C	C	C	T	C	N	C	C	C	C	C	C	T	G	C	C	C	C	T	C	C	C	C	C	T	G	T	C	C	C	C	C	T	C
T	A	T	C	T	T	G	T	T	T	C	C	T	C	T	T	T	T	T	T	T	N	T	T	T	A	T	T	T	T	T	G	T	A	G	T	T	T	T	T	C	A	G	T	T	T	T	T	C	T
T	T	T	C	C	T	T	C	T	C	C	C	T	C	C	T	T	C	C	G	G	N	C	C	C	A	C	C	G	A	C	G	T	A	T	C	C	T	T	C	C	G	T	C	C	C	C	C	T	C
G	C	G	C	C	G	G	C	T	T	C	C	G	C	C	T	G	C	C	T	T	N	C	C	C	T	C	T	T	C	C	T	G	A	A	C	C	G	G	A	C	T	A	T	C	C	T	T	T	C
A	A	A	G	C	A	T	C	G	T	G	G	A	G	C	T	A	C	C	A	G	N	C	C	C	T	C	T	A	G	C	T	A	A	C	C	C	A	A	A	G	C	C	T	C	C	T	T	G	C
A	A	A	C	G	A	T	G	C	G	C	C	A	C	G	C	A	G	G	C	C	N	G	G	G	T	G	G	C	A	G	G	A	T	G	G	G	A	A	A	C	C	G	G	G	G	G	G	A	G
A	T	A	A	C	A	G	C	A	A	A	A	A	A	C	T	A	C	C	G	G	N	C	C	C	T	C	A	G	T	C	G	A	T	A	C	C	A	A	A	A	T	A	A	C	C	A	A	A	C
C	T	C	C	A	C	T	A	T	A	C	C	C	C	A	C	C	A	A	A	T	N	A	A	A	C	A	A	A	C	A	G	C	C	T	A	A	C	C	T	C	C	T	A	A	A	A	A	A	A
T	T	T	T	C	T	A	C	C	A	T	T	T	T	C	C	T	C	C	T	G	N	C	C	C	T	C	A	T	A	C	A	T	T	C	C	C	T	T	T	T	T	C	A	C	C	A	A	C	C
G	T	G	C	T	G	C	T	A	C	C	C	G	C	T	C	G	T	T	C	T	A	T	T	T	C	T	C	C	A	T	A	G	G	A	T	T	G	G	C	C	T	A	C	T	T	C	C	T	T
C	C	C	T	C	C	G	C	G	T	T	T	C	T	C	G	C	C	C	A	T	A	C	C	C	C	C	T	A	T	C	A	C	T	A	C	C	C	C	T	T	T	A	T	C	C	T	T	G	C
T	T	T	T	T	T	A	T	A	G	T	T	T	T	T	C	T	T	T	A	T	T	T	T	T	C	T	G	A	T	T	T	T	G	T	T	T	T	T	G	T	A	T	G	T	T	G	G	C	T
C	C	C	G	T	C	T	T	G	C	G	G	C	G	T	A	C	T	T	T	T	T	T	T	T	G	T	C	T	T	T	T	C	C	T	T	T	C	C	T	G	T	T	C	T	T	C	C	T	T
A	C	A	A	G	A	C	G	G	T	A	A	A	A	G	C	A	G	G	T	A	G	G	G	G	C	G	T	T	T	G	G	A	G	T	G	G	A	A	G	A	G	T	T	G	G	T	T	C	G
A	C	A	A	A	A	A	A	C	C	A	A	A	A	A	T	A	A	A	T	C	T	A	A	A	A	A	C	T	C	A	T	A	T	T	A	A	A	A	C	A	C	T	C	A	A	C	C	A	A
A	G	A	A	A	A	A	A	T	A	A	A	A	A	A	C	A	A	A	T	A	T	A	A	A	C	A	A	T	T	A	T	A	G	C	A	A	A	A	G	A	A	C	A	A	A	A	A	A	A
A	C	A	C	A	A	T	A	G	A	C	C	A	C	A	T	A	A	A	C	G	A	A	A	A	T	A	A	C	C	A	A	A	T	T	A	A	A	A	T	C	T	T	A	A	A	A	A	A	A
T	A	T	T	C	T	T	C	C	A	T	T	T	T	C	T	T	C	C	T	A	A	C	C	C	C	C	A	T	C	C	A	T	T	C	C	C	T	T	G	T	T	C	A	C	C	A	A	A	C
T	C	T	G	T	T	T	T	T	A	G	G	T	G	T	G	T	T	T	C	A	A	T	T	T	T	T	A	C	C	T	A	T	T	C	T	T	T	T	T	G	T	C	A	T	T	A	A	T	T
C	T	C	C	G	C	T	G	C	T	C	C	C	C	G	A	C	G	G	C	G	T	G	G	G	T	G	T	C	G	G	T	C	T	C	G	G	C	C	T	C	G	C	T	G	G	T	T	T	G
T	C	T	T	C	T	C	C	G	T	T	T	T	T	C	A	T	C	C	C	G	T	C	C	C	G	C	T	C	C	C	T	T	A	G	C	C	T	T	T	T	C	G	T	C	C	T	T	C	C
G	T	G	C	T	G	T	T	T	C	C	C	G	C	T	A	G	T	T	G	C	T	T	T	T	A	T	C	G	A	T	T	G	C	C	T	T	G	G	T	C	A	C	C	T	T	C	C	T	T
T	T	T	A	C	T	C	C	G	T	A	A	T	A	C	C	T	C	C	C	C	A	C	C	C	A	C	T	C	C	C	A	T	A	A	C	C	T	T	A	A	T	A	T	C	C	T	T	G	C
G	G	G	A	A	G	C	A	T	G	A	A	G	A	A	T	G	A	A	A	G	T	A	A	A	A	A	G	A	T	A	T	G	G	C	A	A	G	G	C	A	C	C	G	A	A	G	G	T	A
C	A	C	A	A	C	C	A	T	T	A	A	C	A	A	G	C	A	A	C	C	C	A	A	A	C	A	T	C	C	A	C	C	A	T	A	A	C	C	A	A	A	T	T	A	A	T	T	G	A
G	A	G	A	A	G	G	A	G	G	A	A	G	A	A	C	G	A	A	T	T	T	A	A	A	T	A	G	T	T	A	T	G	A	C	A	A	G	G	G	A	G	C	G	A	A	G	G	C	A
T	A	T	T	A	T	C	A	T	C	T	T	T	T	A	T	T	A	A	C	A	C	A	A	A	G	A	C	C	T	A	C	T	G	T	A	A	T	T	A	T	A	T	C	A	A	C	C	G	A
G	C	G	T	T	G	A	T	A	G	T	T	G	T	T	C	G	T	T	T	T	A	T	T	T	C	T	G	T	G	T	A	G	G	T	T	T	G	G	A	T	G	T	G	T	T	G	G	T	T
T	T	T	C	T	T	C	T	C	T	C	C	T	C	T	A	T	T	T	T	A	A	T	T	T	T	T	T	T	A	T	A	T	C	G	T	T	T	T	G	C	G	G	T	T	T	T	T	G	T
T	G	T	T	C	T	T	C	G	G	T	T	T	T	C	A	T	C	C	G	A	C	C	C	C	C	C	G	G	A	C	C	T	C	A	C	C	T	T	G	T	C	A	G	C	C	G	G	T	C
T	C	T	G	T	T	C	T	A	T	G	G	T	G	T	A	T	T	T	A	C	C	T	T	T	A	T	T	A	A	T	C	T	G	A	T	T	T	T	C	G	T	A	T	T	T	T	T	T	T
T	T	T	T	G	T	T	G	T	T	T	T	T	T	G	A	T	G	G	A	A	T	G	G	G	A	G	T	A	C	G	T	T	C	A	G	G	T	T	C	T	G	A	T	G	G	T	T	T	G
A	C	A	G	T	A	T	T	C	T	G	G	A	G	T	T	A	T	T	A	A	G	T	T	T	A	T	T	A	T	T	G	A	T	C	T	T	A	A	G	G	C	C	T	T	T	T	T	T	T
C	A	C	C	G	C	G	G	A	T	C	C	C	C	G	T	C	G	G	C	T	T	G	G	G	A	G	T	C	G	G	T	C	A	T	G	G	C	C	C	C	T	T	T	G	G	T	T	A	G
A	A	A	G	C	A	A	C	A	A	G	G	A	G	C	C	A	C	C	T	A	G	N	C	C	T	C	A	T	C	C	G	A	T	G	C	C	A	A	T	G	C	G	A	C	C	A	A	C	N
G	A	G	T	G	G	A	G	T	C	T	T	G	T	G	T	G	G	G	G	C	C	N	G	G	T	G	C	G	T	G	C	G	A	C	G	G	G	G	A	T	G	C	C	G	G	C	C	A	G
A	A	A	G	T	A	A	T	T	A	G	G	A	G	T	G	A	T	T	C	T	T	N	T	T	C	T	A	C	C	T	T	A	A	T	T	T	A	A	T	G	T	T	A	T	T	A	A	G	T
A	T	A	T	G	A	C	G	T	G	T	T	A	T	G	T	A	G	G	T	A	T	N	G	G	T	G	G	T	A	G	T	A	C	C	G	G	A	A	A	T	G	C	G	G	G	G	G	A	G
G	T	G	T	T	G	T	T	T	A	T	T	G	T	T	G	G	T	T	C	G	G	N	T	T	G	T	A	C	A	T	G	G	A	A	T	T	G	G	A	T	T	A	A	T	T	A	A	A	N
G	C	G	T	T	G	G	T	C	A	T	T	G	T	T	C	G	T	T	A	A	T	N	T	T	T	T	A	A	A	T	T	G	A	A	T	T	G	G	C	T	T	A	A	T	T	A	A	G	T
C	T	C	T	T	C	C	T	T	G	T	T	C	T	T	G	C	T	T	A	T	G	N	T	T	G	T	G	A	A	T	G	C	T	A	T	T	C	C	A	T	G	A	G	T	T	G	G	G	T
C	G	C	A	T	C	T	T	C	G	A	A	C	A	T	T	C	T	T	A	G	A	N	T	T	C	T	G	A	T	T	A	C	A	A	T	T	C	C	A	A	T	A	G	T	T	G	G	C	T
G	T	G	C	A	G	C	A	C	C	C	C	G	C	A	G	G	A	A	A	G	A	N	A	A	G	A	C	A	T	A	A	G	C	T	A	A	G	G	T	C	A	T	C	A	A	C	C	C	N
C	G	C	A	C	C	A	C	C	C	A	A	C	A	C	T	C	C	C	T	A	A	N	C	C	T	C	C	T	C	C	A	C	T	T	C	C	C	C	A	A	C	T	C	C	C	C	C	G	N
T	C	T	G	A	T	A	A	G	G	G	G	T	G	A	T	T	A	A	T	A	T	N	A	A	G	A	G	T	T	A	T	T	A	C	A	A	T	T	C	G	G	C	G	A	A	G	G	C	A
A	G	A	A	G	A	A	G	C	C	A	A	A	A	G	T	A	G	G	C	T	T	N	G	G	T	G	C	C	G	G	T	A	G	T	G	G	A	A	T	A	A	T	C	G	G	C	C	T	G
T	T	T	A	A	T	A	A	A	T	A	A	T	A	A	T	T	A	A	T	T	G	N	A	A	T	A	T	T	T	A	G	T	A	G	A	A	T	T	A	A	T	G	T	A	A	T	T	A	A
A	G	A	G	A	A	T	A	C	A	G	G	A	G	A	A	A	A	A	G	T	T	N	A	A	T	A	A	G	G	A	T	A	T	T	A	A	A	A	G	G	C	T	A	A	A	A	A	T	A
A	T	A	G	G	A	T	G	T	T	G	G	A	G	G	C	A	G	G	T	C	C	N	G	G	T	G	T	T	C	G	C	A	G	G	G	G	A	A	A	G	A	G	T	G	G	T	T	A	N
C	T	C	C	G	C	C	G	C	A	C	C	C	C	G	A	C	G	G	G	A	G	N	G	G	A	G	A	G	G	G	G	C	G	C	G	G	C	C	T	C	A	C	A	G	G	A	A	A	G
A	T	A	C	C	A	T	C	T	A	C	C	A	C	C	G	A	C	C	C	C	G	N	C	C	C	C	A	C	T	C	G	A	A	G	C	C	A	A	G	C	T	G	A	C	C	A	A	C	C
A	T	A	G	C	A	G	C	T	C	G	G	A	G	C	A	A	C	C	G	A	T	N	C	C	A	C	C	G	G	C	T	A	A	T	C	C	A	A	G	G	T	T	C	C	C	C	C	A	N
T	A	T	C	G	T	T	G	G	A	C	C	T	C	G	A	T	G	G	T	G	G	N	G	G	G	G	A	T	T	G	G	T	T	G	G	G	T	T	A	C	T	G	A	G	G	A	A	A	N
A	C	A	T	C	A	G	C	A	A	T	T	A	T	C	G	A	C	C	G	T	G	N	C	C	A	C	A	G	T	C	G	A	T	T	C	C	A	A	A	T	T	T	A	C	C	A	A	T	N
C	A	C	A	T	C	C	T	A	T	A	A	C	A	T	G	C	T	T	T	A	A	N	T	T	A	T	T	T	T	T	A	C	T	T	T	T	C	C	T	A	C	T	T	T	T	T	T	A	T
T	G	T	T	A	T	G	A	A	A	T	T	T	T	A	C	T	A	A	T	T	C	N	A	A	G	A	A	T	T	A	C	T	C	T	A	A	T	T	T	T	T	T	A	A	A	A	A	C	N
A	A	A	A	T	A	T	T	C	C	A	A	A	A	T	C	A	T	T	T	T	A	N	T	T	G	T	C	T	A	T	A	A	A	T	T	T	A	A	T	A	C	T	C	T	T	C	C	T	T
G	A	G	A	A	G	G	A	T	T	A	A	G	A	A	G	G	A	A	T	C	A	N	A	A	C	A	T	T	C	A	A	G	C	A	A	A	G	G	C	A	C	A	T	A	A	T	T	A	N
A	G	A	C	A	A	T	A	G	A	C	C	A	C	A	C	A	A	A	A	A	A	N	A	A	C	A	A	A	A	A	A	A	A	C	A	A	A	A	A	C	C	C	A	A	A	A	A	G	N
T	G	T	A	C	T	T	C	C	G	A	A	T	A	C	T	T	C	C	C	C	T	N	C	C	G	C	G	C	G	C	T	T	G	A	C	C	T	T	C	A	G	A	G	C	C	G	G	A	N
G	C	G	A	A	G	T	A	T	A	A	A	G	A	A	A	G	A	A	A	T	T	N	A	A	C	A	A	A	A	A	T	G	T	G	A	A	G	G	A	A	C	G	A	A	A	A	A	T	A
G	C	G	T	A	G	T	A	C	T	T	T	G	T	A	T	G	A	A	G	G	G	N	A	A	T	A	T	G	A	A	G	G	A	A	A	A	G	G	G	T	A	A	T	A	A	T	T	G	A
A	G	A	A	T	A	A	T	A	G	A	A	A	A	T	A	A	T	T	A	A	T	N	T	T	A	T	G	A	G	T	T	A	T	A	T	T	A	A	T	A	C	A	G	T	T	G	G	G	T
A	C	A	C	A	A	C	A	A	G	C	C	A	C	A	A	A	A	A	A	G	C	N	A	A	T	A	G	A	G	A	C	A	T	G	A	A	A	A	A	C	T	G	G	A	A	G	G	A	A
T	T	T	T	C	T	A	C	A	A	T	T	T	T	C	C	T	C	C	G	A	A	N	C	C	A	C	A	G	C	C	A	T	C	G	C	C	T	T	T	T	C	G	A	C	C	A	A	A	C
T	A	T	A	T	T	G	T	A	A	A	A	T	A	T	A	T	T	T	G	C	C	N	T	T	A	T	A	G	C	T	C	T	A	C	T	T	T	T	T	A	T	C	A	T	T	A	A	T	T
T	T	T	G	A	T	A	A	T	T	G	G	T	G	A	A	T	A	A	C	T	C	N	A	A	C	A	T	C	G	A	C	T	C	C	A	A	T	T	C	G	T	C	T	A	A	T	T	T	N
C	A	C	A	G	C	A	G	T	T	A	A	C	A	G	T	C	G	G	C	C	T	N	G	G	A	G	T	C	C	G	T	C	T	G	G	G	C	C	A	A	G	G	T	G	G	T	T	T	N
A	A	A	T	A	A	G	A	C	T	T	T	A	T	A	A	A	A	A	G	A	G	N	A	A	A	A	T	G	T	A	G	A	G	C	A	A	A	A	C	T	A	C	T	A	A	T	T	C	A
C	C	C	G	T	C	G	T	T	C	G	G	C	G	T	C	C	T	T	C	T	T	N	T	T	T	T	C	C	A	T	T	C	A	T	T	T	C	C	T	G	A	T	C	T	T	C	C	A	T
A	A	A	G	G	A	C	G	G	A	G	G	A	G	G	T	A	G	G	T	T	G	N	G	G	A	G	A	T	T	G	G	A	G	A	G	G	A	A	G	G	A	A	A	G	G	A	A	C	N
G	A	G	A	G	G	C	G	T	C	A	A	G	A	G	A	G	G	G	A	G	C	N	G	G	C	G	C	A	A	G	C	G	A	T	G	G	G	G	A	A	C	T	C	G	G	C	C	A	G
T	T	T	A	A	T	G	A	G	A	A	A	T	A	A	G	T	A	A	T	A	A	N	A	A	T	A	A	T	A	A	A	T	C	A	A	A	T	T	G	A	T	A	A	A	A	A	A	G	N
A	A	A	T	A	A	C	A	C	G	T	T	A	T	A	A	A	A	A	A	T	A	N	A	A	A	A	G	A	C	A	A	A	T	A	A	A	A	A	A	T	G	A	G	A	A	G	G	T	A
T	C	T	T	T	T	T	T	G	T	T	T	T	T	T	T	T	T	T	A	G	A	N	T	T	G	T	T	A	A	T	A	T	C	C	T	T	T	T	C	T	C	C	T	T	T	T	T	A	N
T	T	T	T	T	T	A	T	T	A	T	T	T	T	T	G	T	T	T	C	C	G	N	T	T	A	T	A	C	A	T	G	T	A	A	T	T	T	T	T	T	T	A	A	T	T	A	A	T	T
C	A	C	C	T	C	T	T	G	T	C	C	C	C	T	G	C	T	T	A	T	G	N	T	T	T	T	T	A	T	T	G	C	T	A	T	T	C	C	C	C	C	A	T	T	T	T	T	T	T
A	G	A	A	C	A	A	C	T	T	A	A	A	A	C	A	A	C	C	A	A	A	N	C	C	G	C	T	A	A	C	A	A	T	T	C	C	A	A	A	A	A	T	T	C	C	T	T	C	C
C	A	C	C	A	C	A	A	T	C	C	C	C	C	A	A	C	A	A	T	T	A	N	A	A	G	A	C	T	C	A	A	C	G	A	A	A	C	C	T	C	A	A	C	A	A	C	C	A	A
T	T	T	A	C	T	C	C	T	A	A	A	T	A	C	T	T	C	C	A	G	A	N	C	C	A	C	A	A	T	C	A	T	A	C	C	C	T	T	T	A	A	C	A	C	C	A	A	C	C
G	G	G	G	A	G	A	A	T	C	G	G	G	G	A	T	G	A	A	C	A	T	N	A	A	A	A	C	C	A	A	T	G	T	T	A	A	G	G	G	G	A	T	C	A	A	C	C	T	N
A	G	A	T	G	A	A	G	A	T	T	T	A	T	G	T	A	G	G	T	T	T	N	G	G	T	G	T	T	G	G	T	A	G	A	G	G	A	A	A	T	T	A	T	G	G	T	T	G	N
G	A	G	A	T	G	T	T	C	G	A	A	G	A	T	C	G	T	T	A	G	A	N	T	T	T	T	G	A	A	T	A	G	C	G	T	T	G	G	T	A	T	G	G	T	T	G	G	A	N
A	A	A	T	A	A	A	A	A	A	T	T	A	T	A	A	A	A	A	G	T	A	N	A	A	T	A	A	G	T	A	A	A	T	A	A	A	A	A	G	T	C	A	A	A	A	A	A	G	A
C	T	C	T	T	C	C	T	G	G	T	T	C	T	T	C	C	T	T	A	T	G	N	T	T	C	T	G	A	G	T	G	C	A	T	T	T	C	C	C	T	T	T	G	T	T	G	G	A	T
T	T	T	C	T	T	T	T	A	A	C	C	T	C	T	A	T	T	T	T	C	G	N	T	T	A	T	A	T	G	T	G	T	T	G	T	T	T	T	T	C	G	G	A	T	T	A	A	C	T
C	T	C	A	C	C	A	C	A	C	A	A	C	A	C	G	C	C	C	G	A	A	N	C	C	C	C	C	G	A	C	A	C	G	G	C	C	C	C	A	A	T	G	C	C	C	C	C	T	C
A	C	A	C	A	A	G	A	G	T	C	C	A	C	A	T	A	A	A	G	C	G	N	A	A	A	A	T	G	A	A	G	A	A	A	A	A	A	A	T	C	G	A	T	A	A	T	T	C	N
T	A	T	T	C	T	A	C	G	C	T	T	T	T	C	A	T	C	C	A	A	A	N	C	C	G	C	C	A	T	C	A	T	T	A	C	C	T	T	G	T	C	A	C	C	C	C	C	A	C
T	C	T	G	T	T	T	T	C	A	G	G	T	G	T	T	T	T	T	A	T	G	N	T	T	T	T	A	A	T	T	G	T	G	T	T	T	T	T	A	G	G	T	A	T	T	A	A	T	T
G	A	G	A	G	G	G	G	C	T	A	A	G	A	G	T	G	G	G	T	C	T	N	G	G	A	G	T	T	T	G	T	G	T	T	G	G	G	G	T	A	T	T	T	G	G	T	T	T	G
A	G	A	G	A	A	G	A	G	T	G	G	A	G	A	C	A	A	A	T	T	G	N	A	A	T	A	T	T	C	A	G	A	T	T	A	A	A	A	G	G	G	T	T	A	A	T	T	G	A
T	T	T	A	G	T	A	G	C	G	A	A	T	A	G	A	T	G	G	T	G	T	N	G	G	T	G	G	T	A	G	T	T	C	C	G	G	T	T	T	A	T	C	G	G	G	G	G	A	G
G	A	G	C	A	G	A	A	T	A	C	C	G	C	A	C	G	A	A	C	A	T	N	A	A	C	A	A	C	C	A	T	G	A	A	A	A	G	G	T	C	T	A	A	A	A	A	A	T	A
C	T	C	T	C	C	T	C	A	T	T	T	C	T	C	T	C	C	C	A	T	C	N	C	C	A	C	T	A	A	C	C	C	C	C	C	C	C	C	C	T	T	C	T	C	C	T	T	G	C
T	T	T	C	T	T	T	T	T	G	C	C	T	C	T	G	T	T	T	C	T	A	N	T	T	C	T	G	C	G	T	A	T	A	A	T	T	T	T	A	C	T	A	G	T	T	G	G	C	N
A	C	A	A	C	A	T	C	A	C	A	A	A	A	C	A	A	C	C	A	T	G	N	C	C	T	C	C	A	T	C	G	A	T	G	C	C	A	A	C	A	A	G	C	C	C	C	C	T	N
T	A	T	T	A	T	C	A	A	T	T	T	T	T	A	G	T	A	A	G	G	A	N	A	A	G	A	T	G	A	A	A	T	C	T	A	A	T	T	A	T	C	T	T	A	A	T	T	A	N
G	C	G	T	T	G	A	T	C	A	T	T	G	T	T	A	G	T	T	T	G	C	N	T	T	A	T	A	T	T	T	C	G	T	A	T	T	G	G	T	T	A	A	A	T	T	A	A	T	T
A	T	G	G	T	A	C	T	A	T	G	G	A	G	T	C	A	T	T	A	C	A	N	T	T	G	T	T	A	T	T	A	A	G	T	T	T	A	A	C	G	G	T	T	T	T	T	T	G	T
T	G	T	A	G	T	A	G	A	G	A	A	T	A	G	T	T	G	G	T	T	T	N	G	G	A	G	G	T	C	G	T	T	A	T	G	G	T	T	T	A	A	T	G	G	G	G	G	A	N
G	A	G	T	A	G	G	A	T	A	T	T	G	T	A	C	G	A	A	T	A	T	N	A	A	C	A	A	T	A	A	T	G	T	C	A	A	G	G	G	T	A	C	A	A	A	A	A	T	A
T	G	T	G	T	T	T	T	A	T	G	G	T	G	T	A	T	T	T	C	C	C	N	T	T	T	T	T	C	C	T	C	T	T	A	T	T	T	T	A	G	G	A	T	T	T	T	T	G	T
T	A	T	C	G	T	A	G	C	G	C	C	T	C	G	T	T	G	G	A	T	T	N	G	G	C	G	G	A	T	G	T	T	T	C	G	G	T	T	T	C	G	C	G	G	G	G	G	T	N
C	C	C	T	C	C	T	C	T	T	T	T	C	T	C	T	C	C	C	C	A	T	N	C	C	A	C	T	C	G	C	T	C	G	T	C	C	C	C	T	T	C	T	T	C	C	T	T	T	C
A	T	A	A	T	A	T	T	A	T	A	A	A	A	T	G	A	T	T	T	A	T	N	T	T	T	T	T	T	A	T	T	A	G	G	T	T	A	A	T	A	C	G	T	T	T	T	T	C	T
C	C	C	T	A	C	C	A	G	C	T	T	C	T	A	A	C	A	A	G	C	A	N	A	A	T	A	C	G	G	A	A	C	C	A	A	A	C	C	G	T	G	A	C	A	A	C	C	A	A
A	A	A	G	T	A	A	T	A	A	G	G	A	G	T	T	A	T	T	A	A	A	N	T	T	G	T	A	A	A	T	A	A	T	G	T	T	A	A	G	G	C	G	A	T	T	A	A	C	T
T	T	T	A	G	T	C	G	T	C	A	A	T	A	G	G	T	G	G	G	A	G	N	G	G	A	G	C	G	C	G	G	T	A	A	G	G	T	T	C	A	T	A	C	G	G	C	C	A	G
C	T	C	T	A	C	T	A	G	A	T	T	C	T	A	C	C	A	A	A	T	C	N	A	A	T	A	A	A	T	A	C	C	C	C	A	A	C	C	T	T	A	C	A	A	A	A	A	T	N
T	G	T	G	T	T	G	T	G	T	G	G	T	G	T	T	T	T	T	C	C	T	N	T	T	G	T	T	C	C	T	T	T	T	T	T	T	T	T	A	G	T	T	T	T	T	T	T	C	N
G	A	G	T	G	G	A	G	A	C	T	T	G	T	G	A	G	G	G	T	T	T	N	G	G	C	G	C	T	A	G	T	G	A	C	G	G	G	G	C	T	A	C	C	G	G	C	C	T	G
A	T	A	T	T	A	G	T	A	T	T	T	A	T	T	T	A	T	T	C	A	G	N	T	T	T	T	T	C	T	T	G	A	A	A	T	T	A	A	T	T	A	A	T	T	T	T	T	G	T
T	G	T	C	T	T	A	T	T	G	C	C	T	C	T	G	T	T	T	A	G	T	N	T	T	A	T	G	A	T	T	T	T	C	T	T	T	T	T	A	C	C	T	G	T	T	G	G	A	T
T	C	T	A	C	T	C	C	T	A	A	A	T	A	C	A	T	C	C	T	T	A	N	C	C	T	C	A	T	G	C	A	T	A	T	C	C	T	T	A	A	A	T	A	C	C	A	A	T	N
T	T	T	C	A	T	T	A	T	T	C	C	T	C	A	T	T	A	A	T	T	A	N	A	A	G	A	T	T	A	A	A	T	A	G	A	A	T	T	C	C	A	G	T	A	A	T	T	T	N
G	A	G	A	C	G	C	C	C	T	A	A	G	A	C	G	G	C	C	G	G	A	N	C	C	A	C	T	G	T	C	A	G	T	A	C	C	G	G	A	A	T	A	T	C	C	T	T	T	C
G	T	G	T	A	G	A	A	A	T	T	T	G	T	A	T	G	A	A	A	T	T	N	A	A	T	A	T	A	G	A	T	G	C	T	A	A	G	G	A	T	A	T	T	A	A	T	T	G	A
C	G	C	C	T	C	T	T	C	G	C	C	C	C	T	T	C	T	T	T	A	A	N	T	T	G	T	G	T	C	T	A	C	T	G	T	T	C	C	T	C	C	G	G	T	T	G	G	G	T
T	A	T	T	C	T	T	C	A	G	T	T	T	T	C	C	T	C	C	G	A	A	N	C	C	T	C	G	G	T	C	A	T	A	C	C	C	T	T	C	T	T	C	G	C	C	G	G	C	C
A	T	A	G	T	A	G	T	G	C	G	G	A	G	T	A	A	T	T	C	T	A	N	T	T	T	T	C	C	A	T	A	A	G	T	T	T	A	A	T	G	A	T	C	T	T	C	C	T	T
C	G	C	A	G	C	A	G	T	T	A	A	C	A	G	C	C	G	G	T	G	T	N	G	G	C	G	T	T	T	G	T	C	T	A	G	G	C	C	A	A	G	A	T	G	G	T	T	A	G
T	T	T	T	A	T	T	A	A	A	T	T	T	T	A	A	T	A	A	A	G	T	N	A	A	A	A	A	A	G	A	T	T	T	T	A	A	T	T	G	T	A	T	A	A	A	A	A	C	N
A	T	A	T	T	A	G	T	T	C	T	T	A	T	T	T	A	T	T	T	C	T	N	T	T	C	T	C	T	A	T	T	A	G	G	T	T	A	A	T	T	T	G	C	T	T	C	C	T	N
A	C	A	T	T	A	C	T	T	T	T	T	A	T	T	C	A	T	T	G	C	T	N	T	T	A	T	T	G	T	T	T	A	T	A	T	T	A	A	T	T	G	A	T	T	T	T	T	A	T
C	A	C	G	T	C	T	T	C	A	G	G	C	G	T	T	C	T	T	A	T	T	N	T	T	T	T	A	A	G	T	T	C	A	T	T	T	C	C	G	G	G	T	A	T	T	A	A	A	T
A	C	A	G	G	A	A	G	A	A	G	G	A	G	G	G	A	G	G	T	A	G	N	G	G	C	G	A	T	T	G	G	A	A	G	G	G	A	A	T	G	A	G	A	G	G	A	A	C	N
A	A	A	C	G	A	T	G	C	C	C	C	A	C	G	A	A	G	G	G	C	G	N	G	G	T	G	C	G	T	G	G	A	T	T	G	G	A	A	A	C	A	T	C	G	G	C	C	A	G
T	T	T	T	C	T	G	C	T	A	T	T	T	T	C	T	T	C	C	T	A	C	N	C	C	G	C	A	T	C	C	C	T	G	T	C	C	T	T	A	T	T	T	A	C	C	A	A	A	C
C	C	C	A	T	C	A	T	G	A	A	A	C	A	T	T	C	T	T	T	T	T	N	T	T	A	T	A	T	A	T	T	C	G	C	T	T	C	C	T	A	T	C	A	T	T	A	A	T	N
T	T	T	C	A	T	T	A	A	T	C	C	T	C	A	T	T	A	A	C	T	T	N	A	A	T	A	T	C	C	A	T	T	C	A	A	A	T	T	G	C	T	A	T	A	A	T	T	C	N
A	G	A	T	C	A	G	C	G	C	T	T	A	T	C	G	A	C	C	A	A	T	N	C	C	T	C	C	A	A	C	T	A	C	C	C	C	A	A	G	T	C	C	C	C	C	C	C	T	C
G	A	G	A	T	G	T	T	A	T	A	A	G	A	T	G	G	T	T	C	C	G	N	T	T	T	T	T	C	T	T	G	G	T	A	T	T	G	G	C	A	A	A	T	T	T	T	T	A	T
T	T	T	A	A	T	T	A	C	A	A	A	T	A	A	C	T	A	A	A	A	T	N	A	A	G	A	A	A	C	A	T	T	A	T	A	A	T	T	C	A	C	T	A	A	A	A	A	G	N
T	T	T	C	A	T	C	A	T	G	C	C	T	C	A	T	T	A	A	T	G	G	N	A	A	G	A	G	T	T	A	G	T	C	C	A	A	T	T	T	C	A	C	G	A	A	G	G	T	A
G	T	G	A	C	G	A	C	C	T	A	A	G	A	C	A	G	C	C	C	G	T	N	C	C	C	C	T	C	G	C	T	G	A	T	C	C	G	G	A	A	G	T	T	C	C	T	T	T	C
T	G	T	A	A	T	C	A	A	T	A	A	T	A	A	C	T	A	A	T	T	G	N	A	A	T	A	T	T	A	A	G	T	T	G	A	A	T	T	C	A	T	G	T	A	A	T	T	G	N
A	G	A	T	A	A	A	A	T	G	T	T	A	T	A	T	A	A	A	G	G	C	N	A	A	A	A	G	G	T	A	C	A	T	A	A	A	A	A	A	T	A	A	G	A	A	G	G	T	N
A	C	A	C	T	A	T	T	T	T	C	C	A	C	T	A	A	T	T	A	G	T	N	T	T	C	T	T	A	T	T	T	A	A	T	T	T	A	A	T	C	T	T	T	T	T	T	T	A	T
T	T	T	T	C	T	C	C	G	A	T	T	T	T	C	A	T	C	C	T	T	G	N	C	C	T	C	A	T	T	C	G	T	C	T	C	C	T	T	T	T	T	T	A	C	C	A	A	A	C
G	A	G	A	T	G	T	T	A	A	A	A	G	A	T	C	G	T	T	T	G	A	N	T	T	A	T	A	T	G	T	A	G	A	T	T	T	G	G	A	A	C	T	A	T	T	A	A	T	T
G	C	G	G	A	G	G	A	T	T	G	G	G	G	A	A	G	A	A	T	T	C	N	A	A	A	A	T	T	G	A	C	G	G	G	A	A	G	G	C	G	A	G	T	A	A	T	T	G	A
C	T	C	T	G	C	A	G	G	G	T	T	C	T	G	A	C	G	G	G	T	T	N	G	G	C	G	G	G	C	G	T	C	G	G	G	G	C	C	A	T	C	G	G	G	G	G	G	G	G
C	A	C	T	T	C	T	T	C	G	T	T	C	T	T	T	C	T	T	G	G	C	N	T	T	A	T	G	G	T	T	C	C	T	C	T	T	C	C	G	T	T	C	G	T	T	G	G	C	T
[truncated: 27,905 more rows]
[truncated: 297 more columns]

## Sheet: male
VEN_1	VEN_2	CHL_1	ARG_1	COL_1	COL_2	COL_3	COL_4	COL_5	COL_6	COL_7	COL_8	COL_9	COL_10	COL_11	COL_12	COL_13	COL_14	COL_15	COL_16	COL_17	COL_18	COL_19	COL_20	COL_21	COL_22	COL_23	COL_24	COL_25	COL_26	COL_27	COL_28	COL_29	COL_30	COL_31	COL_32	COL_33	COL_34	COL_35	COL_36	COL_37	COL_38	COL_39	COL_40	COL_41	COL_42	COL_43	COL_44	COL_45	COL_46
EPI_ISL_476702	EPI_ISL_476703	EPI_ISL_414577	EPI_ISL_648217	EPI_ISL_447808	EPI_ISL_447776	EPI_ISL_447745	EPI_ISL_653824	EPI_ISL_456123	EPI_ISL_526974	EPI_ISL_447815	EPI_ISL_456146	EPI_ISL_447802	EPI_ISL_456156	EPI_ISL_447771	EPI_ISL_447812	EPI_ISL_498155	EPI_ISL_447753	EPI_ISL_653761	EPI_ISL_456132	EPI_ISL_536399	EPI_ISL_653759	EPI_ISL_447787	EPI_ISL_447811	EPI_ISL_447804	EPI_ISL_526973	EPI_ISL_526971	EPI_ISL_526968	EPI_ISL_653762	EPI_ISL_526934	EPI_ISL_526969	EPI_ISL_456118	EPI_ISL_653760	EPI_ISL_447772	EPI_ISL_447792	EPI_ISL_447754	EPI_ISL_447757	EPI_ISL_498170	EPI_ISL_447743	EPI_ISL_447774	EPI_ISL_498156	EPI_ISL_497745	EPI_ISL_498167	EPI_ISL_498169	EPI_ISL_447781	EPI_ISL_653757	EPI_ISL_456155	EPI_ISL_447761	EPI_ISL_417924	EPI_ISL_447778
T	T	G	A	C	C	T	G	C	A	T	A	T	C	G	G	A	G	A	A	A	A	G	T	T	G	A	A	A	A	A	A	G	G	C	G	T	A	G	T	A	A	A	A	T	A	A	C	A	G
C	C	G	A	T	T	C	C	T	G	C	C	C	A	A	T	G	A	G	G	G	G	A	C	C	C	G	G	G	G	G	N	C	A	T	A	C	G	A	C	G	G	G	G	C	G	C	T	G	A
T	T	T	C	C	G	T	T	T	A	T	T	T	A	T	T	A	T	A	A	A	A	T	T	T	T	A	A	A	A	A	N	T	T	A	T	T	A	T	T	A	A	A	A	T	A	T	A	A	T
A	A	G	C	T	T	C	C	G	T	A	T	C	A	C	C	T	C	T	T	T	T	C	A	A	C	T	T	T	T	T	N	T	C	A	C	C	T	C	A	T	T	T	T	A	T	T	A	T	C
A	A	A	A	A	C	T	G	T	C	A	T	T	C	T	T	C	T	C	C	C	C	T	A	A	G	C	C	C	C	C	N	G	T	A	T	T	C	T	A	C	C	C	C	A	C	T	A	C	T
A	A	C	A	A	G	A	T	A	T	A	C	A	C	G	C	T	G	T	T	T	T	G	A	A	T	T	T	T	T	T	N	T	A	C	G	A	T	G	A	T	T	T	T	A	T	C	C	T	G
C	C	A	C	A	T	A	A	G	G	C	G	A	A	T	T	G	T	G	G	G	G	T	C	C	A	G	G	G	G	G	N	A	A	G	T	A	G	T	C	G	G	G	G	C	G	G	G	G	T
G	G	T	C	C	T	A	C	A	T	G	A	A	A	T	A	T	T	T	T	T	T	T	G	G	C	T	T	T	T	T	N	C	A	A	T	A	T	T	G	T	T	T	T	G	T	A	A	T	T
A	A	C	A	G	G	C	G	T	T	A	T	C	C	C	A	T	C	T	T	T	T	C	A	A	G	T	T	T	T	T	N	G	G	A	C	C	T	C	A	T	T	T	T	A	T	T	A	T	C
A	A	T	A	A	A	G	T	C	C	A	C	G	C	T	A	C	T	C	C	C	C	T	A	A	T	C	C	C	C	C	N	T	T	C	T	G	C	T	A	C	C	C	C	A	C	C	C	C	T
C	C	T	C	A	C	A	G	T	T	C	T	A	A	C	C	T	C	T	T	T	T	C	C	C	G	T	T	T	T	T	N	G	C	T	C	A	T	C	C	T	T	T	T	C	T	T	T	T	C
T	T	A	T	C	A	A	G	G	C	T	C	A	A	T	G	C	T	C	C	C	C	T	T	T	G	C	C	C	C	C	N	G	A	T	T	A	C	T	T	C	C	C	C	T	C	C	T	C	T
T	T	T	T	T	G	C	C	T	T	T	T	C	C	A	A	T	A	T	T	T	T	A	T	T	C	T	T	T	T	T	N	C	T	T	A	C	T	A	T	T	T	T	T	T	T	T	T	T	A
T	T	A	T	T	G	T	T	T	A	T	T	T	T	A	A	A	A	A	A	A	A	A	T	T	T	A	A	A	A	A	N	T	T	A	A	T	A	A	T	A	A	A	A	T	A	T	A	A	A
A	A	C	C	T	A	T	T	C	A	A	G	T	T	A	C	A	A	A	A	A	A	A	A	A	T	A	A	A	A	A	N	T	T	A	A	T	A	A	A	A	A	A	A	A	A	G	A	A	A
A	A	C	G	A	C	T	T	T	A	A	T	T	T	C	T	A	C	A	A	A	A	C	A	A	T	A	A	A	A	A	N	T	G	A	C	T	A	C	A	A	A	A	A	A	A	T	A	A	C
A	A	T	A	A	A	A	G	C	C	A	A	A	C	G	T	C	G	C	C	C	C	G	A	A	G	C	C	C	C	C	N	G	A	A	G	A	C	G	A	C	C	C	C	A	C	A	A	C	G
A	A	T	T	A	C	A	G	T	G	A	G	A	G	A	T	G	A	G	G	G	G	A	A	A	G	G	G	G	G	G	N	G	C	T	A	A	G	A	A	G	G	G	G	A	G	G	T	G	A
T	T	C	C	A	G	A	A	A	A	T	A	A	A	A	A	A	A	A	A	A	A	A	T	T	A	A	A	A	A	A	N	A	T	C	A	A	A	A	T	A	A	A	A	T	A	A	C	A	A
C	C	C	T	T	A	A	G	A	A	C	T	A	T	C	A	A	C	A	A	A	A	C	C	C	G	A	A	A	A	A	N	G	T	T	C	A	A	C	C	A	A	A	A	C	A	T	T	A	C
T	T	C	C	C	G	T	A	A	C	T	C	T	C	T	A	C	T	C	C	C	C	T	T	T	A	C	C	C	C	C	N	A	A	G	T	T	C	T	T	C	C	C	C	T	C	C	G	C	T
G	G	A	T	T	T	C	C	C	T	G	T	C	T	T	A	T	T	T	T	T	T	T	G	G	C	T	T	T	T	T	N	C	G	T	T	C	T	T	G	T	T	T	T	G	T	T	T	T	T
T	T	G	T	G	A	T	T	G	T	T	G	T	C	T	T	T	T	T	T	T	T	T	T	T	T	T	T	T	T	T	N	T	G	G	T	T	T	T	T	T	T	T	T	T	T	G	G	T	T
G	G	G	G	T	A	G	C	A	T	G	T	G	T	A	C	T	A	T	T	T	T	A	G	G	C	T	T	T	T	T	N	C	C	T	A	G	T	A	G	T	T	T	T	G	T	T	T	T	A
T	T	T	T	G	C	T	C	A	A	T	T	T	T	A	T	A	A	A	A	A	A	A	T	T	C	A	A	A	A	A	N	C	G	G	A	T	A	A	T	A	A	A	A	T	A	T	G	A	A
G	G	A	A	T	T	G	G	C	A	G	C	G	G	A	G	A	A	A	A	A	A	A	G	G	G	A	A	A	A	A	N	G	A	G	A	G	A	A	G	A	A	A	A	G	A	C	G	A	A
G	G	A	G	G	C	T	T	T	A	G	T	T	T	A	T	A	A	A	A	A	A	A	G	G	T	A	A	A	A	A	N	T	C	C	A	T	A	A	G	A	A	A	A	G	A	T	C	A	A
C	C	C	A	G	G	G	G	T	A	C	C	G	A	T	G	A	T	A	A	A	A	T	C	C	G	A	A	A	A	A	N	G	G	T	T	G	A	T	C	A	A	A	A	C	A	C	T	A	T
T	T	A	T	C	T	G	G	T	T	T	T	G	G	C	T	T	C	T	T	T	T	C	T	T	G	T	T	T	T	T	N	G	A	G	C	G	T	C	T	T	T	T	T	T	T	T	G	T	C
G	G	A	C	T	C	C	A	A	C	G	A	C	A	T	G	C	T	C	C	C	C	T	G	G	A	C	C	C	C	C	N	A	G	T	T	C	C	T	G	C	C	C	C	G	C	A	T	C	T
T	T	A	T	G	T	T	G	A	T	T	A	T	T	G	G	T	G	T	T	T	T	G	T	T	G	T	T	T	T	T	N	G	C	C	G	T	T	G	T	T	T	T	T	T	T	A	C	T	G
C	C	C	G	T	A	G	G	A	G	C	A	G	C	T	C	G	T	G	G	G	G	T	C	C	G	G	G	G	G	G	N	G	T	A	T	G	G	T	C	G	G	G	G	C	G	A	A	G	T
A	A	C	T	C	T	T	A	A	T	A	C	T	T	G	T	T	G	T	T	T	T	G	A	A	A	T	T	T	T	T	N	A	T	C	G	T	T	G	A	T	T	T	T	A	T	C	C	T	G
C	C	A	T	A	C	C	G	T	G	C	G	C	G	T	G	G	T	G	G	G	G	T	C	C	G	G	G	G	G	G	N	G	G	T	T	C	G	T	C	G	G	G	G	C	G	G	T	G	T
T	T	A	C	C	T	A	G	C	T	T	A	A	T	G	T	T	G	T	T	T	T	G	T	T	G	T	T	T	T	T	N	G	G	C	G	A	T	G	T	T	T	T	T	T	T	A	C	T	G
C	C	C	T	T	T	C	T	T	G	C	A	C	T	G	C	G	G	G	G	G	G	G	C	C	T	G	G	G	G	G	N	T	C	G	G	C	G	G	C	G	G	G	G	C	G	A	G	G	G
G	G	C	C	C	C	T	C	G	G	G	C	T	C	C	A	G	C	G	G	G	G	C	G	G	C	G	G	G	G	G	N	C	A	G	C	T	G	C	G	G	G	G	G	G	G	C	G	G	C
G	G	A	T	G	T	C	T	T	C	G	T	C	T	T	C	C	T	C	C	C	C	T	G	G	T	C	C	C	C	C	N	T	C	C	T	C	C	T	G	C	C	C	C	G	C	T	C	C	T
C	C	A	A	G	G	G	T	G	T	C	T	G	C	G	T	T	G	T	T	T	T	G	C	C	T	T	T	T	T	T	N	T	T	T	G	G	T	G	C	T	T	T	T	C	T	T	T	T	G
T	T	C	A	C	C	G	A	T	G	T	T	G	T	T	C	G	T	G	G	G	G	T	T	T	A	G	G	G	G	G	C	A	G	G	T	G	G	T	T	G	G	G	G	T	G	T	G	G	T
G	G	T	A	T	A	C	T	G	T	G	A	C	A	C	G	T	C	T	T	T	T	C	G	G	T	T	T	T	T	T	T	T	A	C	C	C	T	C	G	T	T	T	T	G	T	A	C	T	C
C	C	T	C	G	G	T	C	G	C	C	A	T	A	A	G	C	A	C	C	C	C	A	C	C	C	C	C	C	C	C	T	C	T	A	A	T	C	A	C	C	C	C	C	C	C	A	A	C	A
A	A	T	G	C	G	G	A	C	A	A	A	G	A	C	C	A	C	A	A	A	A	C	A	A	A	A	A	A	A	A	T	A	C	T	C	G	A	C	A	A	A	A	A	A	A	A	T	A	C
T	T	C	A	A	C	C	G	T	C	T	A	C	C	T	T	C	T	C	C	C	C	T	T	T	G	C	C	C	C	C	C	G	C	G	T	C	C	T	T	C	C	C	C	T	C	A	G	C	T
G	G	G	A	T	T	A	A	G	T	G	T	A	G	C	G	T	C	T	T	T	T	C	G	G	A	T	T	T	T	T	G	A	T	C	C	A	T	C	G	T	T	T	T	G	T	T	C	T	C
C	C	A	C	G	G	T	G	T	C	C	C	T	A	G	C	C	G	C	C	C	C	G	C	C	G	C	C	C	C	C	A	G	T	T	G	T	C	G	C	C	C	C	C	C	C	C	T	C	G
T	T	T	T	C	C	G	G	C	G	T	T	G	A	G	A	G	G	G	G	G	G	G	T	T	G	G	G	G	G	G	T	G	A	T	G	G	G	G	T	G	G	G	G	T	G	T	T	G	G
T	T	C	T	T	T	C	C	A	G	T	G	C	C	C	T	G	C	G	G	G	G	C	T	T	C	G	G	G	G	G	C	C	T	A	C	C	G	C	T	G	G	G	G	T	G	G	A	G	C
A	A	T	T	T	T	T	A	C	C	A	T	T	T	T	G	C	T	C	C	C	C	T	A	A	A	C	C	C	C	C	T	A	G	G	T	T	C	T	A	C	C	C	C	A	C	T	G	C	T
G	G	C	A	A	A	T	C	T	T	G	G	T	T	G	C	T	G	T	T	T	T	G	G	G	C	T	T	T	T	T	C	C	A	T	G	T	T	G	G	T	T	T	T	G	T	G	T	T	G
T	T	T	A	G	C	A	G	C	G	T	T	A	T	C	T	G	C	G	G	G	G	C	T	T	G	G	G	G	G	G	T	G	A	G	C	A	G	C	T	G	G	G	G	T	G	T	G	G	C
G	G	T	A	T	G	G	T	G	C	G	G	G	A	A	T	C	A	C	C	C	C	A	G	G	T	C	C	C	C	C	T	T	G	C	A	G	C	A	G	C	C	C	C	G	C	G	C	C	A
C	C	G	A	G	G	T	C	G	A	C	G	T	A	T	A	A	T	A	A	A	A	T	C	C	C	A	A	A	A	A	G	C	N	A	T	T	A	T	C	A	A	A	A	C	A	G	A	A	T
A	A	T	T	C	T	G	A	C	T	A	C	G	A	G	G	T	G	T	T	T	T	G	A	A	A	T	T	T	T	T	T	A	N	C	G	G	T	G	A	T	T	T	T	A	T	C	C	T	G
C	C	A	C	A	T	C	A	T	G	C	T	C	A	C	T	G	C	G	G	G	G	C	C	C	A	G	G	G	G	G	A	A	N	T	C	C	G	C	C	G	G	G	G	C	G	T	T	G	C
T	T	G	T	C	T	A	C	G	C	T	G	A	T	T	G	C	T	C	C	C	C	T	T	T	C	C	C	C	C	C	G	C	N	C	T	A	C	T	T	C	C	C	C	T	C	G	C	C	T
C	C	A	G	T	C	C	A	C	T	C	T	C	C	T	C	T	T	T	T	T	T	T	C	C	A	T	T	T	T	T	A	A	N	A	T	C	T	T	C	T	T	T	T	C	T	T	A	T	T
A	A	T	T	C	G	T	T	A	T	A	C	T	T	A	A	T	A	T	T	T	T	A	A	A	T	T	T	T	T	T	T	T	N	C	A	T	T	A	A	T	T	T	T	A	T	C	C	T	A
C	C	C	G	A	T	C	C	T	A	C	A	C	G	G	C	A	G	A	A	A	A	G	C	C	C	A	A	A	A	A	C	C	N	G	G	C	A	G	C	A	A	A	A	C	A	A	G	A	G
G	G	T	T	C	C	A	T	G	G	G	C	A	T	T	T	G	T	G	G	G	G	T	G	G	T	G	G	G	G	G	T	T	N	C	T	A	G	T	G	G	G	G	G	G	G	C	C	G	T
C	C	G	G	G	C	C	T	C	T	C	T	C	G	G	C	T	G	T	T	T	T	G	C	C	T	T	T	T	T	T	G	T	N	A	G	C	T	G	C	T	T	T	T	C	T	T	A	T	G
A	A	T	G	C	G	G	A	T	G	A	C	G	T	C	A	G	C	G	G	G	G	C	A	A	A	G	G	G	G	G	T	A	N	G	C	G	G	C	A	G	G	G	G	A	G	C	G	G	C
G	G	T	C	A	T	C	A	T	C	G	G	C	G	A	C	C	A	C	C	C	C	A	G	G	A	C	C	C	C	C	T	A	N	T	A	C	C	A	G	C	C	C	C	G	C	G	T	C	A
T	T	C	T	G	G	A	A	A	A	T	G	A	G	C	G	A	C	A	A	A	A	C	T	T	A	A	A	A	A	A	C	A	N	A	C	A	A	C	T	A	A	A	A	T	A	G	A	A	C
A	A	T	G	T	T	G	G	G	C	A	C	G	C	T	C	C	T	C	C	C	C	T	A	A	G	C	C	C	C	C	T	G	N	T	T	G	C	T	A	C	C	C	C	A	C	C	T	C	T
T	T	C	T	A	T	T	A	T	T	T	T	T	T	C	A	T	C	T	T	T	T	C	T	T	A	T	T	T	T	T	C	A	N	A	C	T	T	C	T	T	T	T	T	T	T	T	A	T	C
A	A	T	C	T	G	A	T	G	C	A	G	A	G	A	G	C	A	C	C	C	C	A	A	A	T	C	C	C	C	C	T	T	N	A	A	A	C	A	A	C	C	C	C	A	C	G	A	C	A
A	A	A	A	A	C	T	G	C	A	A	C	T	T	C	T	A	C	A	A	A	A	C	A	A	G	A	A	A	A	A	A	G	N	T	C	T	A	C	A	A	A	A	A	A	A	C	T	A	C
T	T	A	C	A	A	A	G	A	C	T	A	A	C	G	A	C	G	C	C	C	C	G	T	T	G	C	C	C	C	C	A	G	N	T	G	A	C	G	T	C	C	C	C	T	C	A	T	C	G
T	T	A	T	T	G	A	C	C	G	T	T	A	A	C	T	G	C	G	G	G	G	C	T	T	C	G	G	G	G	G	A	C	N	A	C	A	G	C	T	G	G	G	G	T	G	T	A	G	C
A	A	C	C	T	C	T	A	T	C	A	G	T	C	A	A	C	A	C	C	C	C	A	A	A	A	C	C	C	C	C	C	A	N	A	A	T	C	A	A	C	C	C	C	A	C	G	A	C	A
A	A	G	G	A	C	T	C	C	A	A	C	T	T	G	A	A	G	A	A	A	A	G	A	A	C	A	A	A	A	A	G	C	N	T	G	T	A	G	A	A	A	A	A	A	A	C	T	A	G
T	T	A	G	A	G	A	T	A	G	T	T	A	C	T	T	G	T	G	G	G	G	T	T	T	T	G	G	G	G	G	A	T	N	A	T	A	G	T	T	G	G	G	G	T	G	T	A	G	T
A	A	A	C	T	A	A	T	C	T	A	T	A	G	A	T	T	A	T	T	T	T	A	A	A	T	T	T	T	T	T	A	T	N	A	A	A	T	A	A	T	T	T	T	A	T	T	A	T	A
A	A	C	T	A	T	T	G	G	A	A	A	T	G	T	A	A	T	A	A	A	A	T	A	A	G	A	A	A	A	A	C	G	N	C	T	T	A	T	A	A	A	A	A	A	A	A	C	A	T
C	C	T	G	A	C	A	T	C	T	C	G	A	C	A	A	T	A	T	T	T	T	A	C	C	T	T	T	T	T	T	T	T	N	T	A	A	T	A	C	T	T	T	T	C	T	G	T	T	A
T	T	T	C	C	A	A	G	A	A	T	T	A	T	A	T	A	A	A	A	A	A	A	T	T	G	A	A	A	A	A	T	G	N	A	A	A	A	A	T	A	A	A	A	T	A	T	A	A	A
A	A	T	A	T	T	C	G	G	A	A	G	C	G	T	A	A	T	A	A	A	A	T	A	A	G	A	A	A	A	A	T	G	N	A	T	C	A	T	A	A	A	A	A	A	A	G	A	A	T
A	A	A	T	A	C	T	C	T	T	A	C	T	C	T	A	T	T	T	T	T	T	T	A	A	C	T	T	T	T	T	A	C	N	T	T	T	T	T	A	T	T	T	T	A	T	C	T	T	T
T	T	A	G	A	N	A	T	A	T	T	A	A	A	A	C	T	A	T	T	T	T	A	T	T	T	T	T	T	T	T	A	T	N	T	A	A	T	A	T	T	T	T	T	T	T	A	T	T	A
T	T	A	C	T	N	A	T	T	A	T	C	A	T	A	T	A	A	A	A	A	A	A	T	T	T	A	A	A	A	A	A	T	N	A	A	A	A	A	T	A	A	A	A	T	A	C	A	A	A
A	A	A	T	T	N	T	A	A	A	A	T	T	G	T	A	A	T	A	A	A	A	T	A	A	A	A	A	A	A	A	A	A	N	C	T	T	A	T	A	A	A	A	A	A	A	T	C	A	T
C	C	T	T	A	N	T	G	A	T	C	C	T	C	A	A	T	A	T	T	T	T	A	C	C	G	T	T	T	T	T	T	G	N	T	A	T	T	A	C	T	T	T	T	C	T	C	T	T	A
T	T	C	A	C	N	A	T	T	A	T	A	A	T	A	T	A	A	A	A	A	A	A	T	T	T	A	A	A	A	A	C	T	N	G	A	A	A	A	T	A	A	A	A	T	A	A	G	A	A
G	G	T	G	T	N	C	A	T	A	G	C	C	T	C	T	A	C	A	A	A	A	C	G	G	A	A	A	A	A	A	T	A	N	T	C	C	A	C	G	A	A	A	A	G	A	C	T	A	C
T	T	G	T	G	N	T	G	A	C	T	G	T	A	T	A	C	T	C	C	C	C	T	T	T	G	C	C	C	C	C	G	G	N	C	T	T	C	T	T	C	C	C	C	T	C	G	C	C	T
C	C	T	G	T	N	G	A	A	T	C	C	G	G	A	C	T	A	T	T	T	T	A	C	C	A	T	T	T	T	T	T	A	N	G	A	G	T	A	C	T	T	T	T	C	T	C	G	T	A
G	G	G	C	C	N	T	A	T	A	G	A	T	T	A	T	A	A	A	A	A	A	A	G	G	A	A	A	A	A	A	G	A	N	T	A	T	A	A	G	A	A	A	A	G	A	A	T	A	A
T	T	T	A	G	N	C	G	A	A	T	G	C	G	T	G	A	T	A	A	A	A	T	T	T	G	A	A	A	A	A	T	G	N	T	T	C	A	T	T	A	A	A	A	T	A	G	T	A	T
T	T	G	C	T	N	G	T	A	T	T	T	G	C	T	T	T	T	T	T	T	T	T	T	T	T	T	T	T	T	T	G	T	N	G	T	G	T	T	T	T	T	T	T	T	T	T	G	T	T
G	G	G	T	T	N	T	T	C	T	G	A	T	A	A	C	T	A	T	T	T	T	A	G	G	T	T	T	T	T	T	G	T	N	A	A	T	T	A	G	T	T	T	T	G	T	A	A	T	A
A	A	C	C	G	N	T	G	T	A	A	T	T	C	C	G	A	C	A	A	A	A	C	A	A	G	A	A	A	A	A	C	G	N	C	C	T	A	C	A	A	A	A	A	A	A	T	C	A	C
C	C	T	A	A	N	G	A	A	C	C	A	G	T	T	T	C	T	C	C	C	C	T	C	C	A	C	C	C	C	C	T	A	N	A	T	G	C	T	C	C	C	C	C	C	C	A	A	C	T
A	A	G	C	C	N	A	A	A	T	A	A	A	C	G	T	T	G	T	T	T	T	G	A	A	A	T	T	T	T	T	G	A	N	G	G	A	T	G	A	T	T	T	T	A	T	A	G	T	G
G	G	T	G	A	T	C	A	T	G	G	T	C	A	T	G	G	T	G	G	G	G	T	G	G	A	G	G	G	G	G	T	A	N	G	T	C	G	T	G	G	G	G	G	G	G	T	G	G	T
G	G	C	C	G	N	A	A	T	T	G	T	A	C	C	A	T	C	T	T	T	T	C	G	G	A	T	T	T	T	T	C	A	N	A	C	A	T	C	G	T	T	T	T	G	T	T	A	T	C
A	A	A	A	G	N	G	A	A	C	A	A	G	G	G	C	C	G	C	C	C	C	G	A	A	A	C	C	C	C	C	A	A	N	C	G	G	C	G	A	C	C	C	C	A	C	A	C	C	G
C	C	C	G	A	N	G	G	C	G	C	A	G	C	T	A	G	T	G	G	G	G	T	C	C	G	G	G	G	G	G	C	G	N	A	T	G	G	T	C	G	G	G	G	C	G	A	A	G	T
A	A	T	T	C	N	A	G	T	T	A	T	A	A	T	G	T	T	T	T	T	T	T	A	A	G	T	T	T	T	T	T	G	N	C	T	A	T	T	A	T	T	T	T	A	T	T	C	T	T
C	C	C	A	A	N	C	C	G	T	C	A	C	G	G	G	T	G	T	T	T	T	G	C	C	C	T	T	T	T	T	C	C	N	G	G	C	T	G	C	T	T	T	T	C	T	A	G	T	G
G	G	G	T	C	N	A	G	T	G	G	A	A	T	A	A	G	A	G	G	G	G	A	G	G	G	G	G	G	G	G	G	G	N	A	A	A	G	A	G	G	G	G	G	G	G	A	A	G	A
A	A	G	A	G	G	C	T	C	A	A	C	C	A	C	C	A	C	A	A	A	A	C	A	A	T	A	A	A	A	A	G	T	N	G	C	C	A	C	A	A	A	A	A	A	A	C	G	A	C
G	G	C	A	A	T	G	T	G	C	G	T	G	T	A	A	C	A	C	C	C	C	A	G	G	T	C	C	C	C	C	C	T	N	T	A	G	C	A	G	C	C	C	C	G	C	T	T	C	A
T	T	T	T	G	N	A	T	T	A	T	A	A	A	G	C	A	G	A	A	A	A	G	T	T	T	A	A	A	A	A	T	T	N	A	G	A	A	G	T	A	A	A	A	T	A	A	A	A	G
A	A	G	T	T	N	G	T	T	G	A	A	G	A	G	G	G	G	G	G	G	G	G	A	A	T	G	G	G	G	G	G	T	N	A	G	G	G	G	A	G	G	G	G	A	G	A	A	G	G
A	A	C	A	A	G	T	G	G	G	A	T	T	T	A	A	G	A	G	G	G	G	A	A	A	G	G	G	G	G	G	C	G	N	C	A	T	G	A	A	G	G	G	G	A	G	T	C	G	A
C	C	A	A	A	A	A	C	A	A	C	T	A	T	C	G	A	C	A	A	A	A	C	C	C	C	A	A	A	A	A	A	C	N	T	C	A	A	C	C	A	A	A	A	C	A	T	T	A	C
T	T	T	T	C	N	A	C	C	C	T	A	A	A	A	T	C	A	C	C	C	C	A	T	T	C	C	C	C	C	C	T	C	N	C	A	A	C	A	T	C	C	C	C	T	C	A	C	C	A
C	C	G	A	T	N	C	T	A	A	C	C	C	A	C	A	A	C	A	A	A	A	C	C	C	T	A	A	A	A	A	G	T	N	G	C	C	A	C	C	A	A	A	A	C	A	C	G	A	C
G	G	C	A	C	N	T	C	G	C	G	T	T	T	G	A	C	G	C	C	C	C	G	G	G	C	C	C	C	C	C	C	C	N	T	G	T	C	G	G	C	C	C	C	G	C	T	T	C	G
T	T	T	C	G	N	C	A	G	G	T	G	C	A	A	C	G	A	G	G	G	G	A	T	T	A	G	G	G	G	G	T	A	N	C	A	C	G	A	T	G	G	G	G	T	G	G	C	G	A
C	C	T	T	T	N	G	A	A	A	C	T	G	A	G	T	A	G	A	A	A	A	G	C	C	A	A	A	A	A	A	T	A	N	T	G	G	A	G	C	A	A	A	A	C	A	T	T	A	G
T	T	A	A	C	N	T	C	C	G	T	C	T	C	T	C	G	T	G	G	G	G	T	T	T	C	G	G	G	G	G	A	C	N	A	T	T	G	T	T	G	G	G	G	T	G	C	A	G	T
A	A	G	A	T	N	C	T	A	T	A	G	C	T	A	G	T	A	T	T	T	T	A	A	A	T	T	T	T	T	T	G	T	N	T	A	C	T	A	A	T	T	T	T	A	T	G	T	T	A
T	T	T	T	A	N	T	T	C	A	T	T	T	A	A	T	A	A	A	A	A	A	A	T	T	T	A	A	A	A	A	T	T	N	C	A	T	A	A	T	A	A	A	A	T	A	T	C	A	A
C	C	G	T	T	N	A	G	G	A	C	T	A	A	C	C	A	C	A	A	A	A	C	C	C	G	A	A	A	A	A	G	G	N	T	C	A	A	C	C	A	A	A	A	C	A	T	T	A	C
T	T	C	A	C	N	T	A	A	C	T	G	T	T	T	T	C	T	C	C	C	C	T	T	T	A	C	C	C	C	C	C	A	N	T	T	T	C	T	T	C	C	C	C	T	C	G	T	C	T
T	T	A	C	T	N	C	A	G	T	T	A	C	T	C	A	T	C	T	T	T	T	C	T	T	A	T	T	T	T	T	A	A	N	C	C	C	T	C	T	T	T	T	T	T	T	A	C	T	C
C	C	C	T	T	N	T	C	T	C	C	C	T	A	G	T	C	G	C	C	C	C	G	C	C	C	C	C	C	C	C	C	C	N	T	G	T	C	G	C	C	C	C	C	C	C	C	T	C	G
T	T	T	G	C	N	T	A	A	G	T	A	T	C	T	C	G	T	G	G	G	G	T	T	T	A	G	G	G	G	G	T	A	N	G	T	T	G	T	T	G	G	G	G	T	G	A	G	G	T
G	G	C	T	T	N	C	G	A	T	G	G	C	T	C	T	T	C	T	T	T	T	C	G	G	G	T	T	T	T	T	C	G	N	C	C	C	T	C	G	T	T	T	T	G	T	G	C	T	C
C	C	A	C	G	N	T	C	C	C	C	G	T	G	T	T	C	T	C	C	C	C	T	C	C	C	C	C	C	C	C	A	C	N	A	T	T	C	T	C	C	C	C	C	C	C	G	A	C	T
A	A	C	G	C	N	G	C	T	T	A	A	G	T	A	C	T	A	T	T	T	T	A	A	A	C	T	T	T	T	T	C	C	N	G	A	G	T	A	A	T	T	T	T	A	T	A	G	T	A
G	G	G	T	A	N	C	C	C	A	G	C	C	C	T	T	A	T	A	A	A	A	T	G	G	C	A	A	A	A	A	G	C	N	G	T	C	A	T	G	A	A	A	A	G	A	C	G	A	T
G	G	C	T	G	N	A	T	G	T	G	A	A	G	C	G	T	C	T	T	T	T	C	G	G	T	T	T	T	T	T	C	T	N	C	C	A	T	C	G	T	T	T	T	G	T	A	C	T	C
C	C	A	G	G	N	G	A	T	C	C	C	G	T	T	C	C	T	C	C	C	C	T	C	C	A	C	C	C	C	C	A	A	N	T	T	G	C	T	C	C	C	C	C	C	C	C	T	C	T
T	T	G	A	C	N	G	T	C	T	T	G	G	T	T	A	T	T	T	T	T	T	T	T	T	T	T	T	T	T	T	G	T	N	G	T	G	T	T	T	T	T	T	T	T	T	G	G	T	T
G	G	T	C	T	N	C	G	T	T	G	A	C	G	C	G	T	C	T	T	T	T	C	G	G	G	T	T	T	T	T	T	G	N	C	C	C	T	C	G	T	T	T	T	G	T	A	C	T	C
C	C	A	A	G	N	T	T	A	C	C	G	T	A	T	G	C	T	C	C	C	C	T	C	C	T	C	C	C	C	C	A	T	N	T	T	T	C	T	C	C	C	C	C	C	C	G	T	C	T
T	T	T	G	C	N	G	G	T	T	T	T	G	C	G	C	T	G	T	T	T	T	G	T	T	G	T	T	T	T	T	T	G	N	T	G	G	T	G	T	T	T	T	T	T	T	T	T	T	G
T	T	A	G	T	N	C	T	C	G	T	A	C	A	C	T	G	C	G	G	G	G	C	T	T	T	G	G	G	G	G	A	T	N	A	C	C	G	C	T	G	G	G	G	T	G	A	A	G	C
A	A	A	A	T	N	T	T	T	C	A	A	T	G	A	G	C	A	C	C	C	C	A	A	A	T	C	C	C	C	C	A	T	N	C	A	T	C	A	A	C	C	C	C	A	C	A	C	C	A
C	C	T	C	A	N	T	C	T	A	C	C	T	G	G	C	A	G	A	A	A	A	G	C	C	C	A	A	A	A	A	T	C	N	G	G	T	A	G	C	A	A	A	A	C	A	C	G	A	G
G	G	T	A	C	N	A	A	C	G	G	T	A	A	G	T	G	G	G	G	G	G	G	G	G	A	G	G	G	G	G	T	A	N	G	G	A	G	G	G	G	G	G	G	G	G	T	G	G	G
G	G	A	C	G	N	C	T	T	G	G	C	C	C	C	T	G	C	G	G	G	G	C	G	G	T	G	G	G	G	G	A	T	N	T	C	C	G	C	G	G	G	G	G	G	G	C	T	G	C
T	T	A	G	G	N	G	C	G	C	T	G	G	A	T	A	C	T	C	C	C	C	T	T	T	C	C	C	C	C	C	A	C	N	T	T	G	C	T	T	C	C	C	C	T	C	G	T	C	T
T	T	T	A	T	N	G	A	C	T	T	T	G	C	G	C	T	G	T	T	T	T	G	T	T	A	T	T	T	T	T	T	A	N	T	G	G	T	G	T	T	T	T	T	T	T	T	T	T	G
T	T	A	G	T	N	T	A	A	G	T	C	T	G	C	G	G	C	G	G	G	G	C	T	T	A	G	G	G	G	G	A	A	N	C	C	T	G	C	T	G	G	G	G	T	G	C	C	G	C
C	C	A	T	T	N	T	A	G	C	C	T	T	A	T	G	C	T	C	C	C	C	T	C	C	A	C	C	C	C	C	A	A	N	G	T	T	C	T	C	C	C	C	C	C	C	T	G	C	T
G	G	C	A	C	N	T	C	G	T	G	A	T	G	T	T	T	T	T	T	T	T	T	G	G	C	T	T	T	T	T	C	C	N	T	T	T	T	T	G	T	T	T	T	G	T	A	T	T	T
T	T	T	A	G	N	C	G	C	T	T	T	C	T	A	T	T	A	T	T	T	T	A	T	T	G	T	T	T	T	T	T	G	N	C	A	C	T	A	T	T	T	T	T	T	T	T	C	T	A
C	C	A	C	T	N	G	T	T	A	C	C	G	A	C	T	A	C	A	A	A	A	C	C	C	T	A	A	A	A	A	A	T	N	C	C	G	A	C	C	A	A	A	A	C	A	C	C	A	C
C	C	A	T	C	N	T	T	G	C	C	T	T	A	G	C	C	G	C	C	C	C	G	C	C	T	C	C	C	C	C	A	T	N	G	G	T	C	G	C	C	C	C	C	C	C	T	G	C	G
G	G	T	C	C	N	C	C	C	G	G	T	C	C	G	G	G	G	G	G	G	G	G	G	G	C	G	G	G	G	G	T	C	N	T	G	C	G	G	G	G	G	G	G	G	G	T	T	G	G
T	T	T	G	G	N	C	G	T	G	T	C	C	T	T	T	G	T	G	G	G	G	T	T	T	G	G	G	G	G	G	T	G	N	G	T	C	G	T	T	G	G	G	G	T	G	C	G	G	T
G	G	A	T	T	N	G	G	T	T	G	T	G	C	T	C	T	T	T	T	T	T	T	G	G	G	T	T	T	T	T	A	G	N	T	T	G	T	T	G	T	T	T	T	G	T	T	T	T	T
T	T	C	C	G	N	T	A	A	T	T	G	T	G	T	C	T	T	T	T	T	T	T	T	T	A	T	T	T	T	T	C	A	N	T	T	T	T	T	T	T	T	T	T	T	T	G	T	T	T
T	T	T	T	T	N	G	T	C	T	T	C	G	T	C	G	T	C	T	T	T	T	C	T	T	T	T	T	T	T	T	T	T	N	G	C	G	T	C	T	T	T	T	T	T	T	C	G	T	C
G	G	G	A	T	N	T	G	G	C	G	A	T	C	G	T	C	G	C	C	C	C	G	G	G	G	C	C	C	C	C	G	G	N	C	G	T	C	G	G	C	C	C	C	G	C	A	C	C	G
C	C	T	T	G	N	T	C	G	G	C	G	T	T	T	G	G	T	G	G	G	G	T	C	C	C	G	G	G	G	G	T	C	N	A	T	T	G	T	C	G	G	G	G	C	G	G	A	G	T
A	A	C	C	C	N	G	T	T	T	A	G	G	A	C	T	T	C	T	T	T	T	C	A	A	T	T	T	T	T	T	C	T	N	G	C	G	T	C	A	T	T	T	T	A	T	G	G	T	C
G	G	G	T	A	N	C	C	T	C	G	C	C	T	C	T	C	C	C	C	C	C	C	G	G	C	C	C	C	C	C	G	C	N	C	C	C	C	C	G	C	C	C	C	G	C	C	C	C	C
C	C	T	T	G	N	A	G	T	C	C	T	A	C	G	G	C	G	C	C	C	C	G	C	C	G	C	C	C	C	C	T	G	N	C	G	A	C	G	C	C	C	C	C	C	C	T	C	C	G
C	C	T	C	C	N	G	A	C	G	C	G	G	T	T	C	G	T	G	G	G	G	T	C	C	A	G	G	G	G	G	T	A	N	G	T	G	G	T	C	G	G	G	G	C	G	G	G	G	T
G	G	G	T	C	N	C	A	G	T	G	C	C	T	G	A	T	G	T	T	T	T	G	G	G	A	T	T	T	T	T	G	A	N	A	G	C	T	G	G	T	T	T	T	G	T	C	A	T	G
A	A	A	G	G	N	C	C	T	G	A	T	C	C	T	G	G	T	G	G	G	G	T	A	A	C	G	G	G	G	G	A	C	N	T	T	C	G	T	A	G	G	G	G	A	G	T	T	G	T
T	T	C	C	A	N	G	T	C	T	T	T	G	T	T	C	T	T	T	T	T	T	T	T	T	T	T	T	T	T	T	C	T	N	C	T	G	T	T	T	T	T	T	T	T	T	T	C	T	T
C	C	A	A	T	N	A	G	C	T	C	A	A	G	G	C	T	G	T	T	T	T	G	C	C	G	T	T	T	T	T	A	G	N	A	G	A	T	G	C	T	T	T	T	C	T	A	A	T	G
A	A	G	G	C	N	T	C	G	G	A	C	T	C	C	G	G	C	G	G	G	G	C	A	A	C	G	G	G	G	G	G	C	N	T	C	T	G	C	A	G	G	G	G	A	G	C	T	G	C
T	T	G	G	A	N	C	A	T	C	T	G	C	A	A	A	C	A	C	C	C	C	A	T	T	A	C	C	C	C	C	G	A	N	C	A	C	C	A	T	C	C	C	C	T	C	G	C	C	A
C	C	A	C	T	N	A	C	G	A	C	G	A	G	G	T	A	G	A	A	A	A	G	C	C	C	A	A	A	A	A	A	C	N	A	G	A	A	G	C	A	A	A	A	C	A	G	A	A	G
A	A	C	T	C	N	T	C	T	G	A	T	T	G	C	C	G	C	G	G	G	G	C	A	A	C	G	G	G	G	G	C	C	N	G	C	T	G	C	A	G	G	G	G	A	G	T	G	G	C
G	G	A	G	A	N	C	T	T	C	G	T	C	C	C	A	C	C	C	C	C	C	C	G	G	T	C	C	C	C	C	A	T	N	C	C	C	C	C	G	C	C	C	C	G	C	T	C	C	C
C	C	C	C	G	N	A	C	G	C	C	T	A	T	G	T	C	G	C	C	C	C	G	C	C	C	C	C	C	C	C	C	C	N	A	G	A	C	G	C	C	C	C	C	C	C	T	A	C	G
A	A	G	T	C	N	G	A	C	G	A	C	G	G	A	C	G	A	G	G	G	G	A	A	A	A	G	G	G	G	G	G	A	N	C	A	G	G	A	A	G	G	G	G	A	G	C	C	G	A
C	C	A	T	A	N	C	T	A	A	C	G	C	C	T	A	A	T	A	A	A	A	T	C	C	T	A	A	A	A	A	A	T	N	A	T	C	A	T	C	A	A	A	A	C	A	G	A	A	T
A	A	G	A	C	N	A	G	G	T	A	T	A	T	C	G	T	C	T	T	T	T	C	A	A	G	T	T	T	T	T	G	G	N	T	C	A	T	C	A	T	T	T	T	A	T	T	T	T	C
T	T	T	C	A	N	C	G	C	C	T	C	C	T	A	C	C	A	C	C	C	C	A	T	T	G	C	C	C	C	C	T	G	N	C	A	C	C	A	T	C	C	C	C	T	C	C	C	C	A
C	C	A	G	T	N	A	T	C	A	C	C	A	A	T	A	A	T	A	A	A	A	T	C	C	T	A	A	A	A	A	A	T	N	T	T	A	A	T	C	A	A	A	A	C	A	C	T	A	T
T	T	A	G	C	N	T	C	G	T	T	G	T	C	C	C	T	C	T	T	T	T	C	T	T	C	T	T	T	T	T	A	C	N	A	C	T	T	C	T	T	T	T	T	T	T	G	A	T	C
A	A	C	T	T	N	C	A	A	C	A	T	C	G	A	A	C	A	C	C	C	C	A	A	A	A	C	C	C	C	C	C	A	N	G	A	C	C	A	A	C	C	C	C	A	C	T	G	C	A
G	G	T	T	A	N	T	T	T	A	G	G	T	G	G	T	A	G	A	A	A	A	G	G	G	T	A	A	A	A	A	T	T	N	G	G	T	A	G	G	A	A	A	A	G	A	G	G	A	G
G	G	C	T	G	N	A	G	C	G	G	T	A	T	C	C	G	C	G	G	G	G	C	G	G	G	G	G	G	G	G	C	G	N	T	C	A	G	C	G	G	G	G	G	G	G	T	T	G	C
T	T	G	C	G	N	G	T	A	C	T	T	G	T	A	T	C	A	C	C	C	C	A	T	T	T	C	C	C	C	C	G	T	N	T	A	G	C	A	T	C	C	C	C	T	C	T	T	C	A
T	T	T	G	T	N	G	T	T	A	T	G	G	T	C	A	A	C	A	A	A	A	C	T	T	T	A	A	A	A	A	T	T	N	T	C	G	A	C	T	A	A	A	A	T	A	G	T	A	C
T	T	C	T	T	N	T	A	C	C	T	C	T	C	A	G	C	A	C	C	C	C	A	T	T	A	C	C	C	C	C	C	A	N	T	A	T	C	A	T	C	C	C	C	T	C	C	C	C	A
T	T	T	C	T	N	T	T	A	A	T	A	T	G	T	G	A	T	A	A	A	A	T	T	T	T	A	A	A	A	A	T	T	N	G	T	T	A	T	T	A	A	A	A	T	A	A	G	A	T
G	G	A	C	T	N	T	G	G	T	G	G	T	T	C	T	T	C	T	T	T	T	C	G	G	G	T	T	T	T	T	A	G	N	T	C	T	T	C	G	T	T	T	T	G	T	G	T	T	C
T	T	T	G	G	N	T	G	C	C	T	C	T	C	T	T	C	T	C	C	C	C	T	T	T	G	C	C	C	C	C	T	G	N	C	T	C	C	T	T	C	C	C	C	T	C	C	C	C	T
C	C	C	T	T	N	G	T	A	T	C	C	G	C	A	T	T	A	T	T	T	T	A	C	C	T	T	T	T	T	T	C	T	N	C	A	G	T	A	C	T	T	T	T	C	T	C	C	T	A
C	C	T	G	C	N	T	T	C	A	C	G	T	G	G	T	A	G	A	A	A	A	G	C	C	T	A	A	A	A	A	T	T	N	G	G	T	A	G	C	A	A	A	A	C	A	G	G	A	G
G	G	T	T	C	N	C	G	A	G	G	A	C	T	G	G	G	G	G	G	G	G	G	G	G	G	G	G	G	G	G	T	G	N	G	G	C	G	G	G	G	G	G	G	G	G	A	G	G	G
G	G	C	T	G	N	C	A	T	G	G	T	C	G	T	T	G	T	G	G	G	G	T	G	G	A	G	G	G	G	G	C	A	N	G	T	C	G	T	G	G	G	G	G	G	G	T	G	G	T
G	G	T	G	G	N	G	G	C	T	G	C	G	T	T	C	T	T	T	T	T	T	T	G	G	G	T	T	T	T	T	T	G	N	T	T	G	T	T	G	T	T	T	T	G	T	C	T	T	T
T	T	G	C	G	N	G	C	T	T	T	A	G	T	T	C	T	T	T	T	T	T	T	T	T	C	T	T	T	T	T	G	C	N	G	T	G	T	T	T	T	T	T	T	T	T	A	G	T	T
G	G	C	A	T	N	G	T	A	T	G	T	G	G	T	G	T	T	T	T	T	T	T	G	G	T	T	T	T	T	T	C	T	N	T	T	G	T	T	G	T	T	T	T	G	T	T	T	T	T
T	T	A	G	G	N	T	G	G	T	T	C	T	C	G	G	T	G	T	T	T	T	G	T	T	G	T	T	T	T	T	A	G	N	G	G	T	C	G	T	T	T	T	C	T	T	C	G	C	G
G	G	G	C	T	N	G	G	G	G	G	A	G	A	T	G	G	T	G	G	G	G	T	G	G	G	G	G	G	G	G	G	G	N	A	T	G	G	T	G	G	G	G	G	G	G	A	A	G	T
A	A	G	C	G	N	T	T	T	T	A	G	T	G	C	T	T	C	T	T	T	T	C	A	A	T	T	T	T	T	T	G	T	N	C	C	T	T	C	A	T	T	T	T	A	T	G	C	T	C
C	C	C	G	A	N	G	A	T	C	C	C	G	C	C	G	C	C	C	C	C	C	C	C	C	A	C	C	C	C	C	C	A	N	C	C	G	C	C	C	C	C	C	C	C	C	C	C	C	C
C	C	T	A	C	N	A	G	T	C	C	A	A	C	G	T	C	G	C	C	C	C	G	C	C	G	C	C	C	C	C	T	G	N	G	G	A	C	G	C	C	C	C	C	C	C	A	G	C	G
G	G	G	T	C	N	C	C	C	G	G	C	C	G	G	G	G	G	G	G	G	G	G	G	G	C	G	G	G	G	G	G	C	N	A	G	C	G	G	G	G	G	G	G	G	G	C	A	G	G
A	A	C	C	G	N	C	A	G	G	A	A	C	A	G	A	G	G	G	G	G	G	G	A	A	A	G	G	G	G	G	C	A	N	A	G	C	G	G	A	G	G	G	G	A	G	A	A	G	G
A	A	T	A	A	N	G	G	T	G	A	T	G	T	T	C	G	T	G	G	G	G	T	A	A	G	G	G	G	G	G	T	G	N	A	T	G	G	T	A	G	G	G	G	A	G	T	A	G	T
A	A	T	T	A	N	A	A	C	T	A	C	A	C	G	C	T	G	T	T	T	T	G	A	A	A	T	T	T	T	T	T	A	N	G	G	A	T	G	A	T	T	T	T	A	T	C	G	T	G
G	G	A	C	A	N	A	A	C	G	G	T	A	A	T	G	G	T	G	G	G	G	T	G	G	A	G	G	G	G	G	A	A	N	G	T	A	G	T	G	G	G	G	G	G	G	T	G	G	T
G	G	C	A	G	N	A	C	G	T	G	A	A	T	G	A	T	G	T	T	T	T	G	G	G	C	T	T	T	T	T	C	C	N	T	G	A	T	G	G	T	T	T	T	G	T	A	T	T	G
T	T	G	G	G	N	G	T	G	G	T	G	G	C	A	A	G	A	G	G	G	G	A	T	T	T	G	G	G	G	G	G	T	N	A	A	G	G	A	T	G	G	G	G	T	G	G	A	G	A
A	A	G	C	T	N	G	C	G	A	A	G	G	A	C	A	A	C	A	A	A	A	C	A	A	C	A	A	A	A	A	G	C	N	A	C	G	A	C	A	A	A	A	A	A	A	G	A	A	C
A	A	T	A	A	N	T	G	T	C	A	T	T	G	C	G	C	C	C	C	C	C	C	A	A	G	C	C	C	C	C	T	G	N	G	C	T	C	C	A	C	C	C	C	A	C	T	G	C	C
G	G	T	C	A	N	A	A	G	C	G	T	A	C	G	G	C	G	C	C	C	C	G	G	G	A	C	C	C	C	C	T	A	N	A	G	A	C	G	G	C	C	C	C	G	C	T	A	C	G
A	A	T	A	G	N	A	A	T	G	A	T	A	A	A	T	G	A	G	G	G	G	A	A	A	A	G	G	G	G	G	T	A	N	T	A	A	G	A	A	G	G	G	G	A	G	T	T	G	A
T	T	C	T	A	N	G	G	G	A	T	T	G	C	A	A	A	A	A	A	A	A	A	T	T	G	A	A	A	A	A	C	G	N	G	A	G	A	A	T	A	A	A	A	T	A	T	G	A	A
G	G	G	C	T	N	A	G	A	A	G	G	A	A	A	A	A	A	A	A	A	A	A	G	G	G	A	A	A	A	A	G	G	N	G	A	A	A	A	G	A	A	A	A	G	A	G	G	A	A
G	G	T	T	G	N	T	C	C	A	G	T	T	T	G	G	A	G	A	A	A	A	G	G	G	C	A	A	A	A	A	T	C	N	A	G	T	A	G	G	A	A	A	A	G	A	T	A	A	G
A	A	C	A	G	N	G	A	C	G	A	C	G	C	G	A	G	G	G	G	G	G	G	A	A	A	G	G	G	G	G	C	A	N	G	G	G	G	G	A	G	G	G	G	A	G	C	G	G	G
G	G	C	G	A	N	G	T	G	G	G	C	G	T	T	T	G	T	G	G	G	G	T	G	G	T	G	G	G	G	G	C	T	N	A	T	G	G	T	G	G	G	G	G	G	G	C	A	G	T
A	A	G	G	G	N	A	T	A	T	A	G	A	A	A	G	T	A	T	T	T	T	A	A	A	T	T	T	T	T	T	G	T	N	G	A	A	T	A	A	T	T	T	T	A	T	G	G	T	A
G	G	T	T	A	N	G	C	A	A	G	G	G	G	A	G	A	A	A	A	A	A	A	G	G	C	A	A	A	A	A	T	C	N	C	A	G	A	A	G	A	A	A	A	G	A	G	C	A	A
C	C	G	T	G	N	A	A	A	A	C	G	A	G	G	A	A	G	A	A	A	A	G	C	C	A	A	A	A	A	A	G	A	N	C	G	A	A	G	C	A	A	A	A	C	A	G	C	A	G
C	C	T	T	C	N	G	G	G	G	C	T	G	T	A	G	G	A	G	G	G	G	A	C	C	G	G	G	G	G	G	T	G	N	T	A	G	G	A	C	G	G	G	G	C	G	T	T	G	A
T	T	T	T	C	N	C	T	G	A	T	G	C	T	T	A	A	T	A	A	A	A	T	T	T	T	A	A	A	A	A	T	T	N	T	T	C	A	T	T	A	A	A	A	T	A	G	T	A	T
T	T	G	G	T	N	C	A	T	T	T	T	C	T	G	G	T	G	T	T	T	T	G	T	T	A	T	T	T	T	T	G	A	N	G	G	C	T	G	T	T	T	T	T	T	T	T	G	T	G
G	G	C	T	T	N	T	C	A	G	G	G	T	T	G	C	G	G	G	G	G	G	G	G	G	C	G	G	G	G	G	C	C	N	T	G	T	G	G	G	G	G	G	G	G	G	G	T	G	G
T	T	A	C	G	N	T	G	A	G	T	A	T	G	A	C	G	A	G	G	G	G	A	T	T	G	G	G	G	G	G	A	G	N	C	A	T	G	A	T	G	G	G	G	T	G	A	C	G	A
C	C	G	C	T	N	G	G	G	A	C	C	G	T	G	T	A	G	A	A	A	A	G	C	C	G	A	A	A	A	A	G	G	N	C	G	G	A	G	C	A	A	A	A	C	A	C	C	A	G
C	C	C	G	C	N	T	T	A	G	C	C	T	C	A	T	G	A	G	G	G	G	A	C	C	T	G	G	G	G	G	C	T	N	C	A	T	G	A	C	G	G	G	G	C	G	C	C	G	A
C	C	C	G	C	N	C	C	T	A	C	G	C	C	G	G	A	G	A	A	A	A	G	C	C	C	A	A	A	A	A	C	C	N	T	G	C	A	G	C	A	A	A	A	C	A	G	T	A	G
T	T	G	G	C	N	C	G	G	G	T	A	C	G	C	T	G	C	G	G	G	G	C	T	T	G	G	G	G	G	G	G	G	N	G	C	C	G	C	T	G	G	G	G	T	G	A	G	G	C
G	G	A	T	T	N	C	T	G	C	G	A	C	G	C	C	C	C	C	C	C	C	C	G	G	T	C	C	C	C	C	A	T	N	G	C	C	C	C	G	C	C	C	C	G	C	A	G	C	C
G	G	T	G	G	N	T	A	A	C	G	A	T	G	T	C	C	T	C	C	C	C	T	G	G	A	C	C	C	C	C	T	A	N	T	T	T	C	T	G	C	C	C	C	G	C	A	T	C	T
T	T	C	T	G	N	G	G	G	T	T	G	G	T	T	C	T	T	T	T	T	T	T	T	T	G	T	T	T	T	T	C	G	N	T	T	G	T	T	T	T	T	T	T	T	T	G	T	T	T
T	T	A	G	T	N	G	T	A	T	T	G	G	G	G	T	T	G	T	T	T	T	G	T	T	T	T	T	T	T	T	A	T	N	T	G	G	T	G	T	T	T	T	T	T	T	G	T	T	G
T	T	T	A	T	N	T	G	G	G	T	T	T	T	T	G	G	T	G	G	G	G	T	T	T	G	G	G	G	G	G	T	G	N	C	T	T	G	T	T	G	G	G	G	T	G	T	C	G	T
C	C	C	C	T	N	T	G	C	T	C	A	T	G	C	G	T	C	T	T	T	T	C	C	C	G	T	T	T	T	T	C	G	N	A	C	T	T	C	C	T	T	T	T	C	T	A	A	T	C
A	A	A	C	C	N	T	T	C	C	A	A	T	A	C	T	C	C	C	C	C	C	C	A	A	T	C	C	C	C	C	A	T	N	A	C	T	C	C	A	C	C	C	C	A	C	A	A	C	C
A	A	G	G	A	N	C	G	T	C	A	G	C	C	C	T	C	C	C	C	C	C	C	A	A	G	C	C	C	C	C	G	G	N	C	C	C	C	C	A	C	C	C	C	A	C	G	C	C	C
C	C	C	A	A	N	A	A	T	C	C	A	A	C	T	T	C	T	C	C	C	C	T	C	C	A	C	C	C	C	C	C	A	N	G	T	A	C	T	C	C	C	C	C	C	C	A	G	C	T
G	G	A	A	C	N	A	G	G	T	G	T	A	G	G	C	T	G	T	T	T	T	G	G	G	G	T	T	T	T	T	A	G	N	A	G	A	T	G	G	T	T	T	T	G	T	T	A	T	G
A	A	C	A	G	N	C	A	T	G	A	G	C	A	G	A	G	G	G	G	G	G	G	A	A	A	G	G	G	G	G	C	A	N	G	G	C	G	G	A	G	G	G	G	A	G	G	G	G	G
G	G	A	G	A	N	G	C	C	G	G	G	G	A	T	A	G	T	G	G	G	G	T	G	G	C	G	G	G	G	G	A	C	N	A	T	G	G	T	G	G	G	G	G	G	G	G	A	G	T
A	A	T	G	G	N	A	A	C	T	A	A	A	A	T	C	T	T	T	T	T	T	T	A	A	A	T	T	T	T	T	T	A	N	A	T	A	T	T	A	T	T	T	T	A	T	A	A	T	T
A	A	C	T	A	N	G	C	C	T	A	G	G	G	T	G	T	T	T	T	T	T	T	A	A	C	T	T	T	T	T	C	C	N	A	T	G	T	T	A	T	T	T	T	A	T	G	A	T	T
A	A	T	A	A	N	A	T	T	T	A	A	A	G	C	A	T	C	T	T	T	T	C	A	A	T	T	T	T	T	T	T	T	N	A	C	A	T	C	A	T	T	T	T	A	T	A	A	T	C
A	A	A	A	A	N	A	T	G	C	A	G	A	T	A	G	C	A	C	C	C	C	A	A	A	T	C	C	C	C	C	A	T	N	C	A	A	C	A	A	C	C	C	C	A	C	G	C	C	A
C	C	G	G	A	N	A	G	G	A	C	C	A	A	A	A	A	A	A	A	A	A	A	C	C	G	A	A	A	A	A	G	G	N	A	A	A	A	A	C	A	A	A	A	C	A	C	A	A	A
A	A	G	A	C	N	A	G	T	A	A	C	A	A	C	A	A	C	A	A	A	A	C	A	A	G	A	A	A	A	A	G	G	N	C	C	A	A	C	A	A	A	A	A	A	A	C	C	A	C
C	C	T	T	A	N	C	T	T	C	C	T	C	G	G	A	C	G	C	C	C	C	G	C	C	T	C	C	C	C	C	T	T	N	A	G	C	C	G	C	C	C	C	C	C	C	T	A	C	G
A	A	T	G	C	N	A	G	T	G	A	T	A	A	A	A	G	A	G	G	G	G	A	A	A	G	G	G	G	G	G	T	G	N	C	A	A	G	A	A	G	G	G	G	A	G	T	C	G	A
C	C	T	G	A	N	C	T	C	A	C	G	C	T	G	C	A	G	A	A	A	A	G	C	C	T	A	A	A	A	A	T	T	N	G	G	C	A	G	C	A	A	A	A	C	A	G	G	A	G
G	G	C	A	C	N	A	C	A	G	G	T	A	G	A	A	G	A	G	G	G	G	A	G	G	C	G	G	G	G	G	T	C	N	T	A	A	G	A	G	G	G	G	G	G	G	T	T	G	A
T	T	G	G	G	N	C	C	A	A	T	C	C	G	A	C	A	A	A	A	A	A	A	T	T	C	A	A	A	A	A	G	C	N	C	A	C	A	A	T	A	A	A	A	T	A	C	C	A	A
C	C	T	A	T	N	G	T	C	A	C	C	G	A	A	A	A	A	A	A	A	A	A	C	C	T	A	A	A	A	A	T	T	N	C	A	G	A	A	C	A	A	A	A	C	A	C	C	A	A
C	C	C	G	C	N	T	T	G	A	C	C	T	G	A	C	A	A	A	A	A	A	A	C	C	T	A	A	A	A	A	C	T	N	A	A	T	A	A	C	A	A	A	A	C	A	C	A	A	A
A	A	C	C	C	N	C	G	A	A	A	T	C	A	C	G	A	C	A	A	A	A	C	A	A	G	A	A	A	A	A	C	G	N	A	C	C	A	C	A	A	A	A	A	A	A	T	A	A	C
A	A	G	C	A	N	C	T	G	C	A	G	C	G	A	T	C	A	C	C	C	C	A	A	A	T	C	C	C	C	C	G	T	N	C	A	C	C	A	A	C	C	C	C	A	C	G	C	C	A
C	C	G	T	A	N	A	C	A	A	C	G	A	C	C	C	A	C	A	A	A	A	C	C	C	C	A	A	A	A	A	G	C	N	T	C	A	A	C	C	A	A	A	A	C	A	G	T	A	C
T	T	G	T	C	N	A	C	A	C	T	T	A	C	A	C	C	A	C	C	C	C	A	T	T	C	C	C	C	C	C	G	C	N	C	A	A	C	A	T	C	C	C	C	T	C	T	C	C	A
C	C	T	G	T	N	C	C	A	A	C	T	C	T	C	A	A	C	A	A	A	A	C	C	C	C	A	A	A	A	A	T	C	N	A	C	C	A	C	C	A	A	A	A	C	A	T	A	A	C
A	A	G	T	C	N	T	T	A	C	A	T	T	T	G	A	C	G	C	C	C	C	G	A	A	T	C	C	C	C	C	G	T	N	G	G	T	C	G	A	C	C	C	C	A	C	T	G	C	G
G	G	T	C	A	N	C	C	C	G	G	C	C	G	T	C	G	T	G	G	G	G	T	G	G	C	G	G	G	G	G	T	C	N	T	T	C	G	T	G	G	G	G	G	G	G	C	T	G	T
T	T	G	C	G	N	A	A	A	T	T	A	A	T	C	T	T	C	T	T	T	T	C	T	T	A	T	T	T	T	T	G	A	N	T	C	A	T	C	T	T	T	T	T	T	T	A	T	T	C
T	T	A	C	T	N	G	T	C	C	T	A	G	C	C	C	C	C	C	C	C	C	C	T	T	T	C	C	C	C	C	A	T	N	T	C	G	C	C	T	C	C	C	C	T	C	A	T	C	C
T	T	C	T	T	N	T	G	A	C	T	C	T	C	A	A	C	A	C	C	C	C	A	T	T	G	C	C	C	C	C	C	G	N	G	A	T	C	A	T	C	C	C	C	T	C	C	G	C	A
G	G	C	G	T	N	T	T	C	A	G	G	T	C	A	G	A	A	A	A	A	A	A	G	G	T	A	A	A	A	A	C	T	N	C	A	T	A	A	G	A	A	A	A	G	A	G	C	A	A
C	C	G	G	G	N	T	G	G	A	C	A	T	T	C	T	A	C	A	A	A	A	C	C	C	G	A	A	A	A	A	G	G	N	C	C	T	A	C	C	A	A	A	A	C	A	A	C	A	C
C	C	A	T	C	N	G	G	T	C	C	G	G	G	T	T	C	T	C	C	C	C	T	C	C	G	C	C	C	C	C	A	G	N	T	T	G	C	T	C	C	C	C	C	C	C	G	T	C	T
T	T	A	T	C	N	C	G	C	T	T	A	C	G	C	T	T	C	T	T	T	T	C	T	T	G	T	T	T	T	T	A	G	N	G	C	C	T	C	T	T	T	T	T	T	T	A	G	T	C
G	G	A	T	T	N	C	C	C	C	G	A	C	T	A	G	C	A	C	C	C	C	A	G	G	C	C	C	C	C	C	A	C	N	T	A	C	C	A	G	C	C	C	C	G	C	A	T	C	A
T	T	G	C	G	N	T	G	A	A	T	A	T	T	G	C	A	G	A	A	A	A	G	T	T	G	A	A	A	A	A	G	G	N	T	G	T	A	G	T	A	A	A	A	T	A	A	T	A	G
T	T	G	A	T	N	G	A	A	G	T	A	G	T	T	C	G	T	G	G	G	G	T	T	T	A	G	G	G	G	G	G	A	N	T	T	G	G	T	T	G	G	G	G	T	G	A	T	G	T
T	T	T	A	T	N	T	A	C	T	T	C	T	C	T	T	T	T	T	T	T	T	T	T	T	A	T	T	T	T	T	T	A	N	T	T	T	T	T	T	T	T	T	T	T	T	C	T	T	T
T	T	A	C	T	N	T	A	T	T	T	A	T	A	T	G	T	T	T	T	T	T	T	T	T	A	T	T	T	T	T	A	A	N	A	T	T	T	T	T	T	T	T	T	T	T	A	A	T	T
A	A	A	G	T	N	T	T	C	T	A	C	T	A	G	T	T	G	T	T	T	T	G	A	A	T	T	T	T	T	T	A	T	N	C	G	T	T	G	A	T	T	T	T	A	T	C	C	T	G
C	C	G	A	A	N	T	A	A	G	C	A	T	C	C	T	G	C	G	G	G	G	C	C	C	A	G	G	G	G	G	G	A	N	A	C	T	G	C	C	G	G	G	G	C	G	A	A	G	C
A	A	A	G	C	N	A	C	G	C	A	C	A	G	C	T	C	C	C	C	C	C	C	A	A	C	C	C	C	C	C	A	C	N	G	C	A	C	C	A	C	C	C	C	A	C	C	G	C	C
G	G	T	A	A	N	C	C	T	C	G	G	C	A	T	T	C	T	C	C	C	C	T	G	G	C	C	C	C	C	C	T	C	N	G	T	C	C	T	G	C	C	C	C	G	C	G	G	C	T
G	G	G	A	G	N	A	A	T	T	G	T	A	G	G	A	T	G	T	T	T	T	G	G	G	A	T	T	T	T	T	G	A	N	T	G	A	T	G	G	T	T	T	T	G	T	T	T	T	G
T	T	G	A	G	N	G	G	T	G	T	C	G	A	T	C	G	T	G	G	G	G	T	T	T	G	G	G	G	G	G	G	G	N	T	T	G	G	T	T	G	G	G	G	T	G	C	T	G	T
T	T	A	A	T	N	G	T	G	T	T	C	G	A	T	A	T	T	T	T	T	T	T	T	T	T	T	T	T	T	T	A	T	N	C	T	G	T	T	T	T	T	T	T	T	T	C	C	T	T
C	C	G	C	T	N	T	G	C	T	C	A	T	A	T	G	T	T	T	T	T	T	T	C	C	G	T	T	T	T	T	G	G	N	G	T	T	T	T	C	T	T	T	T	C	T	A	G	T	T
G	G	A	A	C	N	T	G	C	T	G	A	T	A	T	G	T	T	T	T	T	T	T	G	G	G	T	T	T	T	T	A	G	N	C	T	T	T	T	G	T	T	T	T	G	T	A	C	T	T
C	C	G	C	G	N	C	C	T	T	C	C	C	C	A	T	T	A	T	T	T	T	A	C	C	C	T	T	T	T	T	G	C	N	G	A	C	T	A	C	T	T	T	T	C	T	C	G	T	A
G	G	C	A	C	N	G	T	G	A	G	T	G	A	C	T	A	C	A	A	A	A	C	G	G	T	A	A	A	A	A	C	T	N	A	C	G	A	C	G	A	A	A	A	G	A	T	A	A	C
A	A	C	C	G	N	C	T	T	C	A	C	C	C	A	C	C	A	C	C	C	C	A	A	A	T	C	C	C	C	C	C	T	N	C	A	C	C	A	A	C	C	C	C	A	C	C	C	C	A
C	C	T	G	A	N	G	A	T	A	C	A	G	A	G	G	A	G	A	A	A	A	G	C	C	A	A	A	A	A	A	T	A	N	G	G	G	A	G	C	A	A	A	A	C	A	A	G	A	G
G	G	T	T	C	N	A	C	T	G	G	G	A	C	G	C	G	G	G	G	G	G	G	G	G	C	G	G	G	G	G	T	C	N	T	G	A	G	G	G	G	G	G	G	G	G	G	T	G	G
T	T	G	C	G	N	C	C	T	G	T	T	C	G	T	G	G	T	G	G	G	G	T	T	T	C	G	G	G	G	G	G	C	N	G	T	C	G	T	T	G	G	G	G	T	G	T	G	G	T
G	G	T	C	T	N	G	G	A	T	G	T	G	T	T	A	T	T	T	T	T	T	T	G	G	G	T	T	T	T	T	T	G	N	C	T	G	T	T	G	T	T	T	T	G	T	T	C	T	T
C	C	C	A	G	N	T	C	C	T	C	T	T	C	C	C	T	C	T	T	T	T	C	C	C	C	T	T	T	T	T	C	C	N	T	C	T	T	C	C	T	T	T	T	C	T	T	T	T	C
T	T	C	A	C	N	G	A	A	C	T	G	G	C	G	G	C	G	C	C	C	C	G	T	T	A	C	C	C	C	C	C	A	N	C	G	G	C	G	T	C	C	C	C	T	C	G	C	C	G
C	C	C	C	T	N	C	A	G	G	C	C	C	A	C	T	G	C	G	G	G	G	C	C	C	A	G	G	G	G	G	C	A	N	G	C	C	G	C	C	G	G	G	G	C	G	C	G	G	C
G	G	T	T	C	N	T	G	G	C	G	C	T	A	G	G	C	G	C	C	C	C	G	G	G	G	C	C	C	C	C	T	G	N	T	G	T	C	G	G	C	C	C	C	G	C	C	T	C	G
T	T	G	C	G	N	C	G	T	G	T	T	C	C	A	C	G	A	G	G	G	G	A	T	T	G	G	G	G	G	G	G	G	N	A	A	C	G	A	T	G	G	G	G	T	G	T	A	G	A
A	A	G	A	T	N	G	T	T	A	A	G	G	T	C	T	A	C	A	A	A	A	C	A	A	T	A	A	A	A	A	G	T	N	C	C	G	A	C	A	A	A	A	A	A	A	G	C	A	C
C	C	T	G	A	N	T	T	C	C	C	T	T	C	G	C	C	G	C	C	C	C	G	C	C	T	C	C	C	C	C	T	T	N	G	G	T	C	G	C	C	C	C	C	C	C	T	G	C	G
G	G	T	T	C	N	A	C	G	G	G	T	A	A	T	G	G	T	G	G	G	G	T	G	G	C	G	G	G	G	G	T	C	N	T	T	A	G	T	G	G	G	G	G	G	G	T	T	G	T
T	T	T	T	G	N	C	T	C	T	T	T	C	G	G	T	T	G	T	T	T	T	G	T	T	T	T	T	T	T	T	T	T	N	G	G	C	T	G	T	T	T	T	T	T	T	T	G	T	G
G	G	C	T	T	N	G	T	G	G	G	T	G	T	C	A	G	C	G	G	G	G	C	G	G	T	G	G	G	G	G	C	T	N	G	C	G	G	C	G	G	G	G	G	G	G	T	G	G	C
G	G	A	G	G	N	T	C	A	C	G	A	T	T	T	C	C	T	C	C	C	C	T	G	G	C	C	C	C	C	C	A	C	N	C	T	T	C	T	G	C	C	C	C	G	C	A	C	C	T
C	C	A	C	G	N	G	T	C	T	C	C	G	T	C	G	T	C	T	T	T	T	C	C	C	T	T	T	T	T	T	A	T	N	T	C	G	T	C	C	T	T	T	T	C	T	C	T	T	C
T	T	C	C	C	N	G	T	G	C	T	A	G	G	G	T	C	G	C	C	C	C	G	T	T	T	C	C	C	C	C	C	T	N	T	G	G	C	G	T	C	C	C	C	T	C	A	T	C	G
T	T	G	T	T	N	C	C	T	G	T	G	C	C	T	G	G	T	G	G	G	G	T	T	T	C	G	G	G	G	G	G	C	N	T	T	C	G	T	T	G	G	G	G	T	G	G	T	G	T
T	T	A	G	T	N	T	G	G	T	T	G	T	C	A	G	T	A	T	T	T	T	A	T	T	G	T	T	T	T	T	A	G	N	G	A	T	T	A	T	T	T	T	T	T	T	G	G	T	A
G	G	G	T	T	N	T	T	C	A	G	T	T	T	C	C	A	C	A	A	A	A	C	G	G	T	A	A	A	A	A	G	T	N	G	C	T	A	C	G	A	A	A	A	G	A	T	G	A	C
G	G	A	T	G	N	T	A	T	C	G	T	T	G	G	T	C	G	C	C	C	C	G	G	G	A	C	C	C	C	C	A	A	N	A	G	T	C	G	G	C	C	C	C	G	C	T	A	C	G
A	A	A	T	G	N	G	A	C	G	A	C	G	T	T	T	G	T	G	G	G	G	T	A	A	A	G	G	G	G	G	A	A	N	G	T	G	G	T	A	G	G	G	G	A	G	C	G	G	T
G	G	A	T	A	N	G	G	G	T	G	G	G	T	G	T	T	G	T	T	T	T	G	G	G	G	T	T	T	T	T	A	G	N	A	G	G	T	G	G	T	T	T	T	G	T	G	A	T	G
A	A	A	A	G	N	A	A	T	G	A	C	A	T	G	G	G	G	G	G	G	G	G	A	A	A	G	G	G	G	G	A	A	N	C	G	A	G	G	A	G	G	G	G	A	G	C	C	G	G
C	C	C	C	A	N	G	A	A	G	C	G	G	T	C	G	G	C	G	G	G	G	C	C	C	A	G	G	G	G	G	C	A	N	T	C	G	G	C	C	G	G	G	G	C	G	G	T	G	C
T	T	A	A	C	N	A	C	C	C	T	A	A	A	T	A	C	T	C	C	C	C	T	T	T	C	C	C	C	C	C	A	C	N	C	T	A	C	T	T	C	C	C	C	T	C	A	C	C	T
C	C	C	G	T	N	C	G	G	T	C	C	C	C	T	G	T	T	T	T	T	T	T	C	C	G	T	T	T	T	T	C	G	N	C	T	C	T	T	C	T	T	T	T	C	T	C	C	T	T
C	C	A	G	C	N	T	G	T	T	C	G	T	A	T	A	T	T	T	T	T	T	T	C	C	G	T	T	T	T	T	A	G	N	G	T	T	T	T	C	T	T	T	T	C	T	G	G	T	T
G	G	C	T	C	N	C	T	G	T	G	T	C	G	G	C	T	G	T	T	T	T	G	G	G	T	T	T	T	T	T	C	T	N	T	G	C	T	G	G	T	T	T	T	G	T	T	T	T	G
T	T	G	T	G	N	C	A	G	G	T	G	C	G	G	T	G	G	G	G	G	G	G	T	T	A	G	G	G	G	G	G	A	N	G	G	C	G	G	T	G	G	G	G	T	G	G	G	G	G
G	G	T	C	T	N	G	A	C	G	G	C	G	T	A	C	G	A	G	G	G	G	A	G	G	A	G	G	G	G	G	T	A	N	G	A	G	G	A	G	G	G	G	G	G	G	C	G	G	A
G	G	C	G	G	N	T	T	T	A	G	T	T	T	G	C	A	G	A	A	A	A	G	G	G	T	A	A	A	A	A	C	T	N	A	G	T	A	G	G	A	A	A	A	G	A	T	A	A	G
A	A	C	C	G	N	G	A	T	G	A	C	G	C	A	G	G	A	G	G	G	G	A	A	A	A	G	G	G	G	G	C	A	N	G	A	G	G	A	A	G	G	G	G	A	G	C	G	G	A
G	G	A	G	A	N	G	A	T	A	G	G	G	G	C	T	A	C	A	A	A	A	C	G	G	A	A	A	A	A	A	A	A	N	G	C	G	A	C	G	A	A	A	A	G	A	G	G	A	C
G	G	A	A	G	N	A	A	G	C	G	T	A	C	T	G	C	T	C	C	C	C	T	G	G	A	C	C	C	C	C	A	A	N	A	T	A	C	T	G	C	C	C	C	G	C	T	A	C	T
A	A	C	C	G	N	G	G	G	T	A	A	G	G	C	G	T	C	T	T	T	T	C	A	A	G	T	T	T	T	T	C	G	N	G	C	G	T	C	A	T	T	T	T	A	T	A	G	T	C
G	G	T	G	A	N	G	G	A	C	G	C	G	A	C	A	C	C	C	C	C	C	C	G	G	G	C	C	C	C	C	T	G	N	G	C	G	C	C	G	C	C	C	C	G	C	C	G	C	C
G	G	C	T	G	N	A	A	G	C	G	G	A	C	G	G	C	G	C	C	C	C	G	G	G	A	C	C	C	C	C	C	A	N	T	G	A	C	G	G	C	C	C	C	G	C	G	T	C	G
T	T	A	G	G	N	G	G	A	G	T	T	G	G	T	G	G	T	G	G	G	G	T	T	T	G	G	G	G	G	G	A	G	N	C	T	G	G	T	T	G	G	G	G	T	G	T	C	G	T
C	C	G	C	T	N	G	C	C	T	C	G	G	T	G	A	T	G	T	T	T	T	G	C	C	C	T	T	T	T	T	G	C	N	T	G	G	T	G	C	T	T	T	T	C	T	G	T	T	G
T	T	T	T	C	N	T	T	T	G	T	G	T	G	G	G	G	G	G	G	G	G	G	T	T	T	G	G	G	G	G	T	T	N	T	G	T	G	G	T	G	G	G	G	T	G	G	T	G	G
T	T	T	C	T	N	C	G	C	G	T	C	C	C	A	G	G	A	G	G	G	G	A	T	T	G	G	G	G	G	G	T	G	N	A	A	C	G	A	T	G	G	G	G	T	G	C	A	G	A
A	A	T	G	T	N	T	G	C	A	A	T	T	T	G	T	A	G	A	A	A	A	G	A	A	G	A	A	A	A	A	T	G	N	T	G	T	A	G	A	A	A	A	A	A	A	T	T	A	G
T	T	G	T	A	N	T	T	G	G	T	T	T	C	G	C	G	G	G	G	G	G	G	T	T	T	G	G	G	G	G	G	T	N	C	G	T	G	G	T	G	G	G	G	T	G	T	C	G	G
C	C	C	A	T	N	A	G	T	G	C	T	A	G	A	T	G	A	G	G	G	G	A	C	C	G	G	G	G	G	G	C	G	N	A	A	A	G	A	C	G	G	G	G	C	G	T	A	G	A
A	A	C	C	C	N	T	G	G	A	A	G	T	T	G	T	A	G	A	A	A	A	G	A	A	G	A	A	A	A	A	C	G	N	G	G	T	A	G	A	A	A	A	A	A	A	G	G	A	G
G	G	T	G	A	N	C	C	G	G	G	G	C	A	G	A	G	G	G	G	G	G	G	G	G	C	G	G	G	G	G	T	C	N	A	G	C	G	G	G	G	G	G	G	G	G	G	A	G	G
A	A	G	T	G	N	A	C	A	G	A	A	A	C	T	T	G	T	G	G	G	G	T	A	A	C	G	G	G	G	G	G	C	N	G	T	A	G	T	A	G	G	G	G	A	G	A	G	G	T
G	G	T	G	A	N	G	A	G	T	G	G	G	G	C	C	T	C	T	T	T	T	C	G	G	A	T	T	T	T	T	T	A	N	G	C	G	T	C	G	T	T	T	T	G	T	G	G	T	C
G	G	T	G	G	N	A	T	G	C	G	A	A	T	T	A	C	T	C	C	C	C	T	G	G	T	C	C	C	C	C	T	T	N	C	T	A	C	T	G	C	C	C	C	G	C	A	C	C	T
C	C	T	C	G	N	G	A	A	T	C	C	G	G	T	G	T	T	T	T	T	T	T	C	C	A	T	T	T	T	T	T	A	N	A	T	G	T	T	C	T	T	T	T	C	T	C	A	T	T
A	A	T	T	C	N	G	G	G	T	A	T	G	G	A	A	T	A	T	T	T	T	A	A	A	G	T	T	T	T	T	T	G	N	C	A	G	T	A	A	T	T	T	T	A	T	T	C	T	A
C	C	A	T	A	N	C	T	G	A	C	C	C	C	T	G	A	T	A	A	A	A	T	C	C	T	A	A	A	A	A	A	T	N	G	T	C	A	T	C	A	A	A	A	C	A	C	G	A	T
G	G	C	T	C	N	A	T	T	T	G	C	A	T	C	G	T	C	T	T	T	T	C	G	G	T	T	T	T	T	T	C	T	N	T	C	A	T	C	G	T	T	T	T	G	T	C	T	T	C
T	T	A	G	G	N	C	A	C	C	T	G	C	T	A	C	C	A	C	C	C	C	A	T	T	A	C	C	C	C	C	A	A	N	C	A	C	C	A	T	C	C	C	C	T	C	G	C	C	A
C	C	G	G	T	N	G	C	T	A	C	T	G	T	G	A	A	G	A	A	A	A	G	C	C	C	A	A	A	A	A	G	C	N	A	G	G	A	G	C	A	A	A	A	C	A	T	A	A	G
A	A	G	A	C	N	T	G	T	G	A	G	T	G	A	C	G	A	G	G	G	G	A	A	A	G	G	G	G	G	G	G	G	N	A	A	T	G	A	A	G	G	G	G	A	G	G	A	G	A
A	A	T	G	A	N	C	G	A	A	A	G	C	G	G	G	A	G	A	A	A	A	G	A	A	G	A	A	A	A	A	T	G	N	C	G	C	A	G	A	A	A	A	A	A	A	G	C	A	G
C	C	T	A	A	N	A	C	T	G	C	A	A	A	G	T	G	G	G	G	G	G	G	C	C	C	G	G	G	G	G	T	C	N	A	G	A	G	G	C	G	G	G	G	C	G	A	A	G	G
A	A	C	C	C	N	A	G	C	G	A	G	A	G	C	C	G	C	G	G	G	G	C	A	A	G	G	G	G	G	G	C	G	N	T	C	A	G	C	A	G	G	G	G	A	G	G	T	G	C
T	T	G	T	A	N	C	C	A	C	T	G	C	A	A	A	C	A	C	C	C	C	A	T	T	C	C	C	C	C	C	G	C	N	C	A	C	C	A	T	C	C	C	C	T	C	G	C	C	A
C	C	C	C	T	N	A	C	G	A	C	A	A	C	C	A	A	C	A	A	A	A	C	C	C	C	A	A	A	A	A	C	C	N	T	C	A	A	C	C	A	A	A	A	C	A	A	T	A	C
T	T	G	C	C	N	T	G	A	C	T	G	T	T	G	C	C	G	C	C	C	C	G	T	T	G	C	C	C	C	C	G	G	N	T	G	T	C	G	T	C	C	C	C	T	C	G	T	C	G
T	T	A	G	T	N	C	A	G	G	T	G	C	C	T	A	G	T	G	G	G	G	T	T	T	A	G	G	G	G	G	A	A	N	A	T	C	G	T	T	G	G	G	G	T	G	G	A	G	T
A	A	C	T	T	N	T	T	G	T	A	T	T	C	C	T	T	C	T	T	T	T	C	A	A	T	T	T	T	T	T	C	T	N	A	C	T	T	C	A	T	T	T	T	A	T	T	A	T	C
A	A	G	G	A	N	T	C	C	C	A	C	T	G	A	C	C	A	C	C	C	C	A	A	A	C	C	C	C	C	C	G	C	N	A	A	T	C	A	A	C	C	C	C	A	C	C	A	C	A
A	A	T	G	A	N	A	T	A	A	A	T	A	T	A	T	A	A	A	A	A	A	A	A	A	T	A	A	A	A	A	T	T	N	G	A	A	A	A	A	A	A	A	A	A	A	T	G	A	A
G	G	G	A	A	N	A	A	C	A	G	T	A	G	C	T	A	C	A	A	A	A	C	G	G	A	A	A	A	A	A	G	A	N	A	C	A	A	C	G	A	A	A	A	G	A	T	A	A	C
A	A	C	G	G	N	A	A	G	C	A	A	A	G	A	A	C	A	C	C	C	C	A	A	A	A	C	C	C	C	C	C	A	N	T	A	A	C	A	A	C	C	C	C	A	C	A	T	C	A
T	T	T	G	A	N	G	A	T	A	T	T	G	A	T	A	A	T	A	A	A	A	T	T	T	A	A	A	A	A	A	T	A	N	G	T	G	A	T	T	A	A	A	A	T	A	T	G	A	T
G	G	C	A	T	N	A	G	C	T	G	C	A	G	C	A	T	C	T	T	T	T	C	G	G	G	T	T	T	T	T	C	G	N	G	C	A	T	C	G	T	T	T	T	G	T	C	G	T	C
G	G	G	G	G	N	T	T	A	C	G	A	T	G	T	G	C	T	C	C	C	C	T	G	G	T	C	C	C	C	C	G	T	N	C	T	T	C	T	G	C	C	C	C	G	C	A	C	C	T
C	C	T	G	G	N	G	C	A	T	C	G	G	A	T	A	T	T	T	T	T	T	T	C	C	C	T	T	T	T	T	T	C	N	A	T	G	T	T	C	T	T	T	T	C	T	G	A	T	T
A	A	A	T	C	N	G	A	C	T	A	A	G	G	A	T	T	A	T	T	T	T	A	A	A	A	T	T	T	T	T	A	A	N	C	A	G	T	A	A	T	T	T	T	A	T	A	C	T	A
C	C	C	C	A	N	C	T	A	A	C	G	C	G	A	G	A	A	A	A	A	A	A	C	C	T	A	A	A	A	A	C	T	N	T	A	C	A	A	C	A	A	A	A	C	A	G	T	A	A
T	T	G	T	C	N	A	T	T	A	T	G	A	T	A	G	A	A	A	A	A	A	A	T	T	T	A	A	A	A	A	G	T	N	T	A	A	A	A	T	A	A	A	A	T	A	G	T	A	A
T	T	T	T	T	N	C	T	C	A	T	C	C	C	G	C	A	G	A	A	A	A	G	T	T	T	A	A	A	A	A	T	T	N	G	G	C	A	G	T	A	A	A	A	T	A	C	G	A	G
G	G	G	A	T	N	T	G	T	G	G	A	T	T	A	A	G	A	G	G	G	G	A	G	G	G	G	G	G	G	G	G	G	N	T	A	T	G	A	G	G	G	G	G	G	G	A	T	G	A
T	T	G	T	G	N	T	A	T	A	T	C	T	T	T	C	A	T	A	A	A	A	T	T	T	A	A	A	A	A	A	G	A	N	G	T	T	A	T	T	A	A	A	A	T	A	C	G	A	T
G	G	C	C	T	N	G	C	A	T	G	G	G	A	G	T	T	G	T	T	T	T	G	G	G	C	T	T	T	T	T	C	C	N	G	G	G	T	G	G	T	T	T	T	G	T	G	G	T	G
G	G	T	A	G	N	T	T	A	G	G	T	T	T	G	T	G	G	G	G	G	G	G	G	G	T	G	G	G	G	G	T	T	N	C	G	T	G	G	G	G	G	G	G	G	G	T	C	G	G
C	C	T	G	G	N	G	T	A	G	C	C	G	C	C	G	G	C	G	G	G	G	C	C	C	T	G	G	G	G	G	T	T	N	T	C	G	G	C	C	G	G	G	G	C	G	C	T	G	C
T	T	T	A	C	N	G	A	G	C	T	A	G	A	A	T	C	A	C	C	C	C	A	T	T	A	C	C	C	C	C	T	A	N	T	A	G	C	A	T	C	C	C	C	T	C	A	T	C	A
T	T	G	G	T	N	C	G	A	A	T	A	C	G	C	G	A	C	A	A	A	A	C	T	T	G	A	A	A	A	A	G	G	N	A	C	C	A	C	T	A	A	A	A	T	A	A	A	A	C
A	A	G	G	T	N	T	G	T	C	A	C	T	A	T	G	C	T	C	C	C	C	T	A	A	G	C	C	C	C	C	G	G	N	G	T	T	C	T	A	C	C	C	C	A	C	C	G	C	T
G	G	A	C	A	N	T	C	G	T	G	A	T	G	T	C	T	T	T	T	T	T	T	G	G	C	T	T	T	T	T	A	C	N	T	T	T	T	T	G	T	T	T	T	G	T	A	T	T	T
T	T	G	A	G	N	A	G	G	T	T	T	A	G	G	T	T	G	T	T	T	T	G	T	T	G	T	T	T	T	T	G	G	N	A	G	A	T	G	T	T	T	T	T	T	T	T	A	T	G
A	A	A	C	T	N	G	A	C	G	A	C	G	C	T	T	G	T	G	G	G	G	T	A	A	A	G	G	G	G	G	A	A	N	G	T	G	G	T	A	G	G	G	G	A	G	C	G	G	T
G	G	C	G	A	N	T	C	A	T	G	T	T	A	G	A	T	G	T	T	T	T	G	G	G	C	T	T	T	T	T	C	C	N	A	G	T	T	G	G	T	T	T	T	G	T	T	A	T	G
A	A	T	T	G	N	A	G	C	G	A	T	A	C	G	G	G	G	G	G	G	G	G	A	A	G	G	G	G	G	G	T	G	N	A	G	A	G	G	A	G	G	G	G	A	G	T	A	G	G
A	A	C	C	A	N	G	A	T	G	A	A	G	G	C	T	G	C	G	G	G	G	C	A	A	A	G	G	G	G	G	C	A	N	G	C	G	G	C	A	G	G	G	G	A	G	A	G	G	C
G	G	C	A	A	N	A	G	T	C	G	A	A	T	T	A	C	T	C	C	C	C	T	G	G	G	C	C	C	C	C	C	G	N	T	T	A	C	T	G	C	C	C	C	G	C	A	T	C	T
T	T	G	A	G	N	A	C	G	T	T	A	A	C	T	G	T	T	T	T	T	T	T	T	T	C	T	T	T	T	T	G	C	N	T	T	A	T	T	T	T	T	T	T	T	T	A	T	T	T
T	T	T	C	T	N	G	T	T	T	T	G	G	A	A	A	T	A	T	T	T	T	A	T	T	T	T	T	T	T	T	T	T	N	G	A	G	T	A	T	T	T	T	T	T	T	G	G	T	A
G	G	G	A	T	N	T	T	G	A	G	A	T	A	G	A	A	G	A	A	A	A	G	G	G	T	A	A	A	A	A	G	T	N	A	G	T	A	G	G	A	A	A	A	G	A	A	A	A	G
A	A	G	T	G	N	T	G	G	G	A	T	T	C	T	G	G	T	G	G	G	G	T	A	A	G	G	G	G	G	G	G	G	N	A	T	T	G	T	A	G	G	G	G	A	G	T	A	G	T
A	A	A	C	A	N	G	G	C	T	A	G	G	A	A	T	T	A	T	T	T	T	A	A	A	G	T	T	T	T	T	A	G	N	A	A	G	T	A	A	T	T	T	T	A	T	G	A	T	A
A	A	G	T	A	N	A	C	T	A	A	G	A	T	G	T	A	G	A	A	A	A	G	A	A	C	A	A	A	A	A	G	C	N	A	G	A	A	G	A	A	A	A	A	A	A	G	A	A	G
A	A	G	T	A	N	A	A	T	G	A	C	A	C	A	G	G	A	G	G	G	G	A	A	A	A	G	G	G	G	G	G	A	N	A	A	A	G	A	A	G	G	G	G	A	G	C	A	G	A
A	A	A	A	A	N	A	C	A	A	A	A	A	T	A	A	A	A	A	A	A	A	A	A	A	C	A	A	A	A	A	A	C	N	G	A	A	A	A	A	A	A	A	A	A	A	A	G	A	A
G	G	G	A	A	N	A	T	G	A	G	C	A	T	G	A	A	G	A	A	A	A	G	G	G	T	A	A	A	A	A	G	T	N	G	G	A	A	G	G	A	A	A	A	G	A	C	G	A	G
G	G	G	A	G	N	A	G	T	G	G	T	A	A	T	A	G	T	G	G	G	G	T	G	G	G	G	G	G	G	G	G	G	N	C	T	A	G	T	G	G	G	G	G	G	G	T	C	G	T
C	C	T	G	G	N	G	A	A	T	C	T	G	A	T	A	T	T	T	T	T	T	T	C	C	A	T	T	T	T	T	T	A	N	G	T	G	T	T	C	T	T	T	T	C	T	T	G	T	T
G	G	C	A	C	N	G	T	G	T	G	G	G	A	G	A	T	G	T	T	T	T	G	G	G	T	T	T	T	T	T	C	T	N	T	G	G	T	G	G	T	T	T	T	G	T	G	T	T	G
T	T	T	T	G	N	C	C	A	G	T	T	C	G	A	G	G	A	G	G	G	G	A	T	T	C	G	G	G	G	G	T	C	N	T	A	C	G	A	T	G	G	G	G	T	G	T	T	G	A
T	T	T	G	T	N	G	C	A	A	T	G	G	A	A	G	A	A	A	A	A	A	A	T	T	C	A	A	A	A	A	T	C	N	T	A	G	A	A	T	A	A	A	A	T	A	G	T	A	A
T	T	A	G	T	N	T	T	G	A	T	G	T	T	A	C	A	A	A	A	A	A	A	T	T	T	A	A	A	A	A	A	T	N	T	A	T	A	A	T	A	A	A	A	T	A	G	T	A	A
T	T	T	C	T	N	T	T	T	A	T	C	T	G	A	G	A	A	A	A	A	A	A	T	T	T	A	A	A	A	A	T	T	N	G	A	T	A	A	T	A	A	A	A	T	A	C	G	A	A
G	G	C	A	T	N	T	A	T	A	G	T	T	G	A	T	A	A	A	A	A	A	A	G	G	A	A	A	A	A	A	C	A	N	C	A	T	A	A	G	A	A	A	A	G	A	T	C	A	A
C	C	A	C	G	N	T	T	G	A	C	T	T	C	G	T	A	G	A	A	A	A	G	C	C	T	A	A	A	A	A	A	T	N	C	G	T	A	G	C	A	A	A	A	C	A	T	C	A	G
C	C	G	T	C	N	G	G	A	G	C	A	G	A	G	T	G	G	G	G	G	G	G	C	C	G	G	G	G	G	G	G	G	N	T	G	G	G	G	C	G	G	G	G	C	G	A	T	G	G
T	T	A	T	C	N	C	A	A	G	T	G	C	C	C	T	G	C	G	G	G	G	C	T	T	A	G	G	G	G	G	A	A	N	C	C	C	G	C	T	G	G	G	G	T	G	G	C	G	C
C	C	G	G	T	N	C	A	A	C	C	T	C	T	G	G	C	G	C	C	C	C	G	C	C	A	C	C	C	C	C	G	A	N	A	G	C	C	G	C	C	C	C	C	C	C	T	A	C	G
A	A	G	T	C	N	T	G	A	G	A	A	T	T	T	C	G	T	G	G	G	G	T	A	A	G	G	G	G	G	G	G	G	N	A	T	T	G	T	A	G	G	G	G	A	G	A	A	G	T
A	A	C	G	A	N	C	A	A	T	A	G	C	G	T	C	T	T	T	T	T	T	T	A	A	A	T	T	T	T	T	C	A	N	C	T	C	T	T	A	T	T	T	T	A	T	G	C	T	T
C	C	A	G	A	N	A	T	G	T	C	A	A	T	T	T	T	T	T	T	T	T	T	C	C	T	T	T	T	T	T	A	T	N	T	T	A	T	T	C	T	T	T	T	C	T	A	T	T	T
T	T	C	C	C	N	A	T	G	T	T	A	A	G	T	C	T	T	T	T	T	T	T	T	T	T	T	T	T	T	T	C	T	N	T	T	A	T	T	T	T	T	T	T	T	T	A	T	T	T
T	T	G	T	T	N	C	T	C	T	T	G	C	G	G	A	T	G	T	T	T	T	G	T	T	T	T	T	T	T	T	G	T	N	G	G	C	T	G	T	T	T	T	T	T	T	G	G	T	G
G	G	T	T	T	N	T	T	G	G	G	T	T	C	C	A	G	C	G	G	G	G	C	G	G	T	G	G	G	G	G	T	T	N	A	C	T	G	C	G	G	G	G	G	G	G	T	A	G	C
A	A	C	A	G	N	T	C	T	C	A	T	T	T	C	C	C	C	C	C	C	C	C	A	A	C	C	C	C	C	C	C	C	N	A	C	T	C	C	A	C	C	C	C	A	C	T	A	C	C
A	A	A	G	A	N	G	A	T	C	A	G	G	T	T	T	C	T	C	C	C	C	T	A	A	A	C	C	C	C	C	A	A	N	C	T	G	C	T	A	C	C	C	C	A	C	G	C	C	T
C	C	A	T	A	N	A	A	T	T	C	A	A	A	C	T	T	C	T	T	T	T	C	C	C	A	T	T	T	T	T	A	A	N	A	C	A	T	C	C	T	T	T	T	C	T	A	A	T	C
A	A	C	A	C	N	A	G	T	C	A	A	A	G	A	G	C	A	C	C	C	C	A	A	A	G	C	C	C	C	C	C	G	N	G	A	A	C	A	A	C	C	C	C	A	C	A	G	C	A
G	G	A	G	A	N	C	A	G	A	G	A	C	T	A	A	A	A	A	A	A	A	A	G	G	A	A	A	A	A	A	A	A	N	C	A	C	A	A	G	A	A	A	A	G	A	A	C	A	A
C	C	T	A	G	N	A	A	C	A	C	A	A	A	C	A	A	C	A	A	A	A	C	C	C	A	A	A	A	A	A	T	A	N	C	C	A	A	C	C	A	A	A	A	C	A	A	C	A	C
C	C	C	A	C	N	G	A	C	C	C	A	G	G	T	C	C	T	C	C	C	C	T	C	C	A	C	C	C	C	C	C	A	N	C	T	G	C	T	C	C	C	C	C	C	C	A	C	C	T
C	C	T	G	C	N	C	A	T	T	C	G	C	A	T	A	T	T	T	T	T	T	T	C	C	A	T	T	T	T	T	T	A	N	T	T	C	T	T	C	T	T	T	T	C	T	G	T	T	T
T	T	T	T	C	N	C	C	C	T	T	G	C	A	G	G	T	G	T	T	T	T	G	T	T	C	T	T	T	T	T	T	C	N	A	G	C	T	G	T	T	T	T	T	T	T	G	A	T	G
A	A	A	T	T	N	C	T	A	G	A	C	C	G	A	C	G	A	G	G	G	G	A	A	A	T	G	G	G	G	G	A	T	N	T	A	C	G	A	A	G	G	G	G	A	G	C	T	G	A
T	T	A	G	A	N	T	G	A	A	T	G	T	T	A	C	A	A	A	A	A	A	A	T	T	G	A	A	A	A	A	A	G	N	G	A	T	A	A	T	A	A	A	A	T	A	G	G	A	A
G	G	A	A	T	N	A	G	C	A	G	T	A	T	C	C	A	C	A	A	A	A	C	G	G	G	A	A	A	A	A	A	G	N	T	C	A	A	C	G	A	A	A	A	G	A	T	T	A	C
T	T	G	A	G	N	T	A	T	C	T	T	T	G	A	T	C	A	C	C	C	C	A	T	T	A	C	C	C	C	C	G	A	N	G	A	T	C	A	T	C	C	C	C	T	C	T	G	C	A
G	G	A	A	T	N	G	A	T	A	G	T	G	A	G	A	A	G	A	A	A	A	G	G	G	A	A	A	A	A	A	A	A	N	T	G	G	A	G	G	A	A	A	A	G	A	T	T	A	G
T	T	T	A	G	N	T	C	G	G	T	T	T	A	C	T	G	C	G	G	G	G	C	T	T	C	G	G	G	G	G	T	C	N	T	C	T	G	C	T	G	G	G	G	T	G	T	T	G	C
T	T	G	A	T	N	G	A	A	C	T	G	G	A	C	G	C	C	C	C	C	C	C	T	T	A	C	C	C	C	C	G	A	N	C	C	G	C	C	T	C	C	C	C	T	C	G	C	C	C
C	C	G	G	T	N	T	C	A	C	C	C	T	A	C	T	C	C	C	C	C	C	C	C	C	C	C	C	C	C	C	G	C	N	A	C	T	C	C	C	C	C	C	C	C	C	C	A	C	C
A	A	C	G	C	N	T	T	C	C	A	C	T	A	T	G	C	T	C	C	C	C	T	A	A	T	C	C	C	C	C	C	T	N	T	T	T	C	T	A	C	C	C	C	A	C	C	T	C	T
T	T	A	C	A	N	C	A	A	T	T	T	C	G	A	T	T	A	T	T	T	T	A	T	T	A	T	T	T	T	T	A	A	N	C	A	C	T	A	T	T	T	T	T	T	T	T	C	T	A
C	C	C	G	T	N	A	A	G	A	C	C	A	G	T	T	A	T	A	A	A	A	T	C	C	A	A	A	A	A	A	C	A	N	A	T	A	A	T	C	A	A	A	A	C	A	C	A	A	T
A	A	T	T	C	N	T	A	C	T	A	A	T	C	G	C	T	G	T	T	T	T	G	A	A	A	T	T	T	T	T	T	A	N	A	G	T	T	G	A	T	T	T	T	A	T	A	A	T	G
A	A	T	T	A	N	C	C	C	G	A	A	C	G	T	A	G	T	G	G	G	G	T	A	A	C	G	G	G	G	G	T	C	N	A	T	C	G	T	A	G	G	G	G	A	G	A	A	G	T
A	A	G	T	A	N	A	A	C	T	A	C	A	T	G	T	T	G	T	T	T	T	G	A	A	A	T	T	T	T	T	G	A	N	C	G	A	T	G	A	T	T	T	T	A	T	C	C	T	G
C	C	T	T	A	N	A	T	T	G	C	T	A	T	T	C	G	T	G	G	G	G	T	C	C	T	G	G	G	G	G	T	T	N	G	T	A	G	T	C	G	G	G	G	C	G	T	G	G	T
G	G	G	G	C	N	A	A	A	T	G	T	A	T	T	A	T	T	T	T	T	T	T	G	G	A	T	T	T	T	T	G	A	N	T	T	A	T	T	G	T	T	T	T	G	T	T	T	T	T
T	T	G	C	G	N	C	G	T	T	T	G	C	T	C	A	T	C	T	T	T	T	C	T	T	G	T	T	T	T	T	G	G	N	T	C	C	T	C	T	T	T	T	T	T	T	G	T	T	C
T	T	C	C	T	N	G	C	G	C	T	A	G	G	A	A	C	A	C	C	C	C	A	T	T	C	C	C	C	C	C	C	C	N	C	A	G	C	A	T	C	C	C	C	T	C	A	C	C	A
C	C	T	T	T	N	T	A	T	A	C	A	T	C	T	C	A	T	A	A	A	A	T	C	C	A	A	A	A	A	A	T	A	N	G	T	T	A	T	C	A	A	A	A	C	A	A	G	A	T
G	G	T	C	C	N	T	G	G	T	G	C	T	C	C	G	T	C	T	T	T	T	C	G	G	G	T	T	T	T	T	T	G	N	G	C	T	T	C	G	T	T	T	T	G	T	C	G	T	C
G	G	A	A	G	N	C	T	T	C	G	A	C	T	A	T	C	A	C	C	C	C	A	G	G	T	C	C	C	C	C	A	T	N	A	A	C	C	A	G	C	C	C	C	G	C	A	A	C	A
A	A	G	A	G	N	G	G	T	A	A	G	G	C	A	T	A	A	A	A	A	A	A	A	A	G	A	A	A	A	A	G	G	N	T	A	G	A	A	A	A	A	A	A	A	A	G	T	A	A
T	T	T	C	A	N	G	G	C	A	T	C	G	A	A	C	A	A	A	A	A	A	A	T	T	G	A	A	A	A	A	T	G	N	G	A	G	A	A	T	A	A	A	A	T	A	C	G	A	A
G	G	A	T	T	N	A	T	A	A	G	C	A	A	C	G	A	C	A	A	A	A	C	G	G	T	A	A	A	A	A	A	T	N	C	C	A	A	C	G	A	A	A	A	G	A	C	C	A	C
C	C	G	T	G	N	T	G	T	C	C	C	T	C	G	G	C	G	C	C	C	C	G	C	C	G	C	C	C	C	C	G	G	N	T	G	T	C	G	C	C	C	C	C	C	C	C	T	C	G
T	T	A	G	C	N	G	T	C	G	T	T	G	T	T	A	G	T	G	G	G	G	T	T	T	T	G	G	G	G	G	A	T	N	C	T	G	G	T	T	G	G	G	G	T	G	T	C	G	T
C	C	A	A	T	N	C	T	A	T	C	A	C	T	T	T	T	T	T	T	T	T	T	C	C	T	T	T	T	T	T	A	T	N	G	T	C	T	T	C	T	T	T	T	C	T	A	G	T	T
G	G	G	A	C	N	T	A	A	T	G	T	T	G	C	G	T	C	T	T	T	T	C	G	G	A	T	T	T	T	T	G	A	N	A	C	T	T	C	G	T	T	T	T	G	T	T	A	T	C
A	A	T	C	G	N	C	C	A	C	A	G	C	A	G	C	C	G	C	C	C	C	G	A	A	C	C	C	C	C	C	T	C	N	A	G	C	C	G	A	C	C	C	C	A	C	G	A	C	G
A	A	T	A	A	N	G	C	C	G	A	T	G	A	G	T	G	G	G	G	G	G	G	A	A	C	G	G	G	G	G	T	C	N	C	G	G	G	G	A	G	G	G	G	A	G	T	C	G	G
C	C	G	G	A	N	A	C	G	G	C	G	A	C	A	C	G	A	G	G	G	G	A	C	C	C	G	G	G	G	G	G	C	N	T	A	A	G	A	C	G	G	G	G	C	G	G	T	G	A
T	T	A	C	C	N	A	G	T	A	T	T	A	A	T	G	A	T	A	A	A	A	T	T	T	G	A	A	A	A	A	A	G	N	G	T	A	A	T	T	A	A	A	A	T	A	T	G	A	T
G	G	A	C	T	N	C	T	T	T	G	T	C	G	G	A	T	G	T	T	T	T	G	G	G	T	T	T	T	T	T	A	T	N	C	G	C	T	G	G	T	T	T	T	G	T	T	C	T	G
C	C	A	C	G	N	T	G	C	G	C	C	T	C	C	A	G	C	G	G	G	G	C	C	C	G	G	G	G	G	G	A	G	N	A	C	T	G	C	C	G	G	G	G	C	G	C	A	G	C
A	A	A	T	C	N	G	A	G	C	A	A	G	C	T	C	C	T	C	C	C	C	T	A	A	A	C	C	C	C	C	A	A	N	C	T	G	C	T	A	C	C	C	C	A	C	A	C	C	T
C	C	A	A	A	N	C	A	G	T	C	T	C	C	C	T	T	C	T	T	T	T	C	C	C	A	T	T	T	T	T	A	A	N	C	C	C	T	C	C	T	T	T	T	C	T	T	C	T	C
C	C	G	T	C	N	A	C	A	C	C	C	A	T	G	G	C	G	C	C	C	C	G	C	C	C	C	C	C	C	C	G	C	N	T	G	A	C	G	C	C	C	C	C	C	C	C	T	C	G
T	T	G	G	C	N	C	T	T	G	T	A	C	A	A	C	G	A	G	G	G	G	A	T	T	T	G	G	G	G	G	G	T	N	C	A	C	G	A	T	G	G	G	G	T	G	A	C	G	A
C	C	C	T	T	N	C	C	G	A	C	A	C	T	A	A	A	A	A	A	A	A	A	C	C	C	A	A	A	A	A	C	C	N	A	A	C	A	A	C	A	A	A	A	C	A	A	A	A	A
A	A	G	G	C	N	T	A	C	A	A	A	T	G	C	C	A	C	A	A	A	A	C	A	A	A	A	A	A	A	A	G	A	N	T	C	T	A	C	A	A	A	A	A	A	A	A	T	A	C
T	T	T	T	A	N	C	T	T	C	T	C	C	T	T	C	C	T	C	C	C	C	T	T	T	T	C	C	C	C	C	T	T	N	G	T	C	C	T	T	C	C	C	C	T	C	C	G	C	T
G	G	T	T	T	N	A	G	C	T	G	G	A	G	G	T	T	G	T	T	T	T	G	G	G	G	T	T	T	T	T	T	G	N	G	G	A	T	G	G	T	T	T	T	G	T	G	G	T	G
G	G	T	C	G	N	T	C	G	G	G	T	T	T	C	C	G	C	G	G	G	G	C	G	G	C	G	G	G	G	G	T	C	N	T	C	T	G	C	G	G	G	G	G	G	G	T	T	G	C
T	T	T	A	G	N	G	G	A	C	T	T	G	T	A	A	C	A	C	C	C	C	A	T	T	G	C	C	C	C	C	T	G	N	C	A	G	C	A	T	C	C	C	C	T	C	T	C	C	A
C	C	G	T	T	N	G	T	A	A	C	C	G	C	C	T	A	C	A	A	A	A	C	C	C	T	A	A	A	A	A	G	T	N	A	C	G	A	C	C	A	A	A	A	C	A	C	A	A	C
A	A	C	C	C	N	T	G	C	C	A	G	T	A	C	G	C	C	C	C	C	C	C	A	A	G	C	C	C	C	C	C	G	N	T	C	T	C	C	A	C	C	C	C	A	C	G	T	C	C
T	T	C	A	A	N	C	A	T	C	T	G	C	T	T	G	C	T	C	C	C	C	T	T	T	A	C	C	C	C	C	C	A	N	G	T	C	C	T	T	C	C	C	C	T	C	G	G	C	T
G	G	T	A	T	N	A	G	G	T	G	A	A	C	C	T	T	C	T	T	T	T	C	G	G	G	T	T	T	T	T	T	G	N	T	C	A	T	C	G	T	T	T	T	G	T	A	T	T	C
T	T	C	A	G	N	T	C	C	C	T	T	T	A	A	C	C	A	C	C	C	C	A	T	T	C	C	C	C	C	C	C	C	N	T	A	T	C	A	T	C	C	C	C	T	C	T	T	C	A
T	T	A	C	T	N	G	T	A	A	T	G	G	A	T	A	A	T	A	A	A	A	T	T	T	T	A	A	A	A	A	A	T	N	A	T	G	A	T	T	A	A	A	A	T	A	G	A	A	T
A	A	A	G	T	N	T	T	C	T	A	C	T	A	G	T	T	G	T	T	T	T	G	A	A	T	T	T	T	T	T	A	T	N	T	G	T	T	G	A	T	T	T	T	A	T	C	T	T	G
T	T	C	T	A	N	T	A	C	G	T	T	T	C	G	G	G	G	G	G	G	G	G	T	T	A	G	G	G	G	G	C	A	N	G	G	T	G	G	T	G	G	G	G	T	G	T	G	G	G
G	G	T	T	T	N	A	A	T	G	G	C	A	G	T	T	G	T	G	G	G	G	T	G	G	A	G	G	G	G	G	T	A	N	G	T	A	G	T	G	G	G	G	G	G	G	C	G	G	T
G	G	T	C	G	N	T	C	C	T	G	G	T	T	C	T	T	C	T	T	T	T	C	G	G	C	T	T	T	T	T	T	C	N	T	C	T	T	C	G	T	T	T	T	G	T	G	T	T	C
T	T	G	G	G	N	G	G	A	C	T	A	G	T	A	A	C	A	C	C	C	C	A	T	T	G	C	C	C	C	C	G	G	N	T	A	G	C	A	T	C	C	C	C	T	C	A	T	C	A
T	T	A	G	T	N	G	G	T	A	T	A	G	C	T	T	A	T	A	A	A	A	T	T	T	G	A	A	A	A	A	A	G	N	G	T	G	A	T	T	A	A	A	A	T	A	A	G	A	T
G	G	A	A	T	N	T	A	G	T	G	C	T	G	G	G	T	G	T	T	T	T	G	G	G	A	T	T	T	T	T	A	A	N	A	G	T	T	G	G	T	T	T	T	G	T	C	A	T	G
A	A	C	T	G	N	T	G	G	G	A	T	T	G	T	G	G	T	G	G	G	G	T	A	A	G	G	G	G	G	G	C	G	N	G	T	T	G	T	A	G	G	G	G	A	G	T	G	G	T
G	G	A	G	A	N	G	G	T	T	G	G	G	A	T	T	T	T	T	T	T	T	T	G	G	G	T	T	T	T	T	A	G	N	C	T	G	T	T	G	T	T	T	T	G	T	G	C	T	T
C	C	G	C	G	N	A	G	C	T	C	C	A	T	A	T	T	A	T	T	T	T	A	C	C	G	T	T	T	T	T	G	G	N	T	A	A	T	A	C	T	T	T	T	C	T	C	T	T	A
T	T	C	T	C	N	G	G	A	A	T	A	G	G	T	G	A	T	A	A	A	A	T	T	T	G	A	A	A	A	A	C	G	N	G	T	G	A	T	T	A	A	A	A	T	A	A	G	A	T
G	G	C	C	T	N	C	C	T	T	G	C	C	C	G	A	T	G	T	T	T	T	G	G	G	C	T	T	T	T	T	C	C	N	G	G	C	T	G	G	T	T	T	T	G	T	C	G	T	G
G	G	C	G	G	N	T	A	G	G	G	C	T	T	G	G	G	G	G	G	G	G	G	G	G	A	G	G	G	G	G	C	A	N	T	G	T	G	G	G	G	G	G	G	G	G	C	T	G	G
T	T	T	A	G	N	G	T	T	G	T	T	G	C	T	C	G	T	G	G	G	G	T	T	T	T	G	G	G	G	G	T	T	N	A	T	G	G	T	T	G	G	G	G	T	G	T	A	G	T
A	A	A	A	T	N	G	A	T	T	A	C	G	G	T	T	T	T	T	T	T	T	T	A	A	A	T	T	T	T	T	A	A	N	G	T	G	T	T	A	T	T	T	T	A	T	C	G	T	T
G	G	T	C	A	N	T	C	A	T	G	A	T	A	G	G	T	G	T	T	T	T	G	G	G	C	T	T	T	T	T	T	C	N	C	G	T	T	G	G	T	T	T	T	G	T	A	C	T	G
C	C	G	T	G	N	A	A	T	G	C	T	A	A	A	G	G	A	G	G	G	G	A	C	C	A	G	G	G	G	G	G	A	N	A	A	A	G	A	C	G	G	G	G	C	G	T	A	G	A
A	A	T	G	C	N	G	C	G	A	A	G	G	C	G	T	A	G	A	A	A	A	G	A	A	C	A	A	A	A	A	T	C	N	G	G	G	A	G	A	A	A	A	A	A	A	G	G	A	G
G	G	G	C	A	N	C	T	G	G	G	G	C	T	C	A	G	C	G	G	G	G	C	G	G	T	G	G	G	G	G	G	T	N	A	C	C	G	C	G	G	G	G	G	G	G	G	A	G	C
A	A	T	A	G	N	A	C	T	C	A	T	A	G	T	G	C	T	C	C	C	C	T	A	A	C	C	C	C	C	C	T	C	N	A	T	A	C	T	A	C	C	C	C	A	C	T	A	C	T
A	A	T	C	A	N	G	G	T	T	A	C	G	C	G	C	T	G	T	T	T	T	G	A	A	G	T	T	T	T	T	T	G	N	C	G	G	T	G	A	T	T	T	T	A	T	C	C	T	G
C	C	C	C	A	N	A	C	G	G	C	A	A	A	G	A	G	G	G	G	G	G	G	C	C	C	G	G	G	G	G	C	C	N	T	G	A	G	G	C	G	G	G	G	C	G	A	T	G	G
T	T	A	T	C	N	A	T	A	G	T	T	A	C	T	G	G	T	G	G	G	G	T	T	T	T	G	G	G	G	G	A	T	N	C	T	A	G	T	T	G	G	G	G	T	G	T	C	G	T
C	C	T	C	T	N	C	A	G	T	C	G	C	C	A	A	T	A	T	T	T	T	A	C	C	A	T	T	T	T	T	T	A	N	G	A	C	T	A	C	T	T	T	T	C	T	G	G	T	A
G	G	C	A	C	N	T	T	C	A	G	T	T	T	G	A	A	G	A	A	A	A	G	G	G	T	A	A	A	A	A	C	T	N	A	G	T	A	G	G	A	A	A	A	G	A	T	A	A	G
A	A	A	T	G	N	C	G	T	G	A	T	C	C	C	C	G	C	G	G	G	G	C	A	A	G	G	G	G	G	G	A	G	N	A	C	C	G	C	A	G	G	G	G	A	G	T	A	G	C
A	A	A	G	A	N	G	T	G	C	A	A	G	A	A	T	C	A	C	C	C	C	A	A	A	T	C	C	C	C	C	A	T	N	G	A	G	C	A	A	C	C	C	C	A	C	A	G	C	A
G	G	A	G	A	N	A	C	G	A	G	T	A	T	G	C	A	G	A	A	A	A	G	G	G	C	A	A	A	A	A	A	C	N	G	G	A	A	G	G	A	A	A	A	G	A	T	G	A	G
G	G	C	T	G	N	A	G	T	G	G	G	A	G	A	G	G	A	G	G	G	G	A	G	G	G	G	G	G	G	G	C	G	N	C	A	A	G	A	G	G	G	G	G	G	G	G	C	G	A
C	C	G	C	G	N	G	A	A	A	C	G	G	G	A	A	A	A	A	A	A	A	A	C	C	A	A	A	A	A	A	G	A	N	A	A	G	A	A	C	A	A	A	A	C	A	G	A	A	A
A	A	T	A	C	N	G	T	G	A	A	T	G	T	C	A	A	C	A	A	A	A	C	A	A	T	A	A	A	A	A	T	T	N	T	C	G	A	C	A	A	A	A	A	A	A	T	T	A	C
T	T	T	T	A	N	C	A	C	C	T	T	C	C	T	G	C	T	C	C	C	C	T	T	T	A	C	C	C	C	C	T	A	N	T	T	C	C	T	T	C	C	C	C	T	C	T	T	C	T
T	T	C	G	T	C	A	A	A	T	T	G	A	A	C	G	T	C	T	T	T	T	C	T	T	A	T	T	T	T	T	C	A	N	C	C	A	T	C	T	T	T	T	T	T	T	G	C	T	C
C	C	G	T	T	T	T	C	G	C	C	A	T	T	G	C	C	G	C	C	C	C	G	C	C	C	C	C	C	C	C	G	C	N	A	G	T	C	G	C	C	C	C	C	C	C	A	A	C	G
A	A	G	T	C	T	T	A	A	G	A	G	T	G	A	A	G	A	G	G	G	G	A	A	A	A	G	G	G	G	G	G	A	N	G	A	T	G	A	A	G	G	G	G	A	G	G	G	G	A
G	G	A	A	A	C	C	A	A	A	G	C	C	T	A	T	A	A	A	A	A	A	A	G	G	A	A	A	A	A	A	A	A	N	T	A	C	A	A	G	A	A	A	A	G	A	C	T	A	A
T	T	T	T	G	G	A	C	C	A	T	T	A	T	G	T	A	G	A	A	A	A	G	T	T	C	A	A	A	A	A	T	C	N	A	G	A	A	G	T	A	A	A	A	T	A	T	A	A	G
A	A	G	G	T	T	G	T	T	G	A	G	G	A	G	C	G	G	G	G	G	G	G	A	A	T	G	G	G	G	G	G	T	N	C	G	G	G	G	A	G	G	G	G	A	G	G	C	G	G
C	C	C	G	A	A	T	T	C	G	C	G	T	T	C	A	G	C	G	G	G	G	C	C	C	T	G	G	G	G	G	C	T	N	G	C	T	G	C	C	G	G	G	G	C	G	G	G	G	C
G	G	T	T	C	A	A	C	G	C	G	T	A	G	A	G	C	A	C	C	C	C	A	G	G	C	C	C	C	C	C	T	C	N	G	A	A	C	A	G	C	C	C	C	G	C	T	G	C	A
G	G	C	T	G	G	C	T	A	A	G	A	C	G	T	T	A	T	A	A	A	A	T	G	G	T	A	A	A	A	A	C	T	N	T	T	C	A	T	G	A	A	A	A	G	A	A	T	A	T
T	T	G	G	G	A	G	G	A	T	T	G	G	T	T	A	T	T	T	T	T	T	T	T	T	G	T	T	T	T	T	G	G	N	C	T	G	T	T	T	T	T	T	T	T	T	G	C	T	T
C	C	A	A	T	A	G	T	G	T	C	C	G	T	C	C	T	C	T	T	T	T	C	C	C	T	T	T	T	T	T	A	T	N	G	C	G	T	C	C	T	T	T	T	C	T	C	G	T	C
G	G	A	G	C	C	T	G	G	C	G	A	T	G	A	G	C	A	C	C	C	C	A	G	G	G	C	C	C	C	C	A	G	N	T	A	T	C	A	G	C	C	C	C	G	C	A	T	C	A
T	T	C	C	G	G	C	G	C	A	T	G	C	A	G	G	A	G	A	A	A	A	G	T	T	G	A	A	A	A	A	C	G	N	A	G	C	A	G	T	A	A	A	A	T	A	G	A	A	G
A	A	T	T	T	G	G	C	A	G	A	A	G	G	T	T	G	T	G	G	G	G	T	A	A	C	G	G	G	G	G	T	C	N	G	T	G	G	T	A	G	G	G	G	A	G	A	G	G	T
G	G	G	G	A	T	T	C	T	T	G	A	T	C	A	C	T	A	T	T	T	T	A	G	G	C	T	T	T	T	T	G	C	N	T	A	T	T	A	G	T	T	T	T	G	T	A	T	T	A
T	T	C	G	G	A	A	C	T	A	T	C	A	T	C	G	A	C	A	A	A	A	C	T	T	C	A	A	A	A	A	C	C	N	G	C	A	A	C	T	A	A	A	A	T	A	C	G	A	C
G	G	A	T	T	A	G	T	C	C	G	T	G	G	G	T	C	G	C	C	C	C	G	G	G	T	C	C	C	C	C	A	T	N	G	G	G	C	G	G	C	C	C	C	G	C	T	G	C	G
G	G	C	A	G	T	T	G	A	G	G	C	T	G	G	A	G	G	G	G	G	G	G	G	G	G	G	G	G	G	G	C	G	N	T	G	T	G	G	G	G	G	G	G	G	G	C	T	G	G
T	T	C	G	G	A	G	A	G	G	T	G	G	T	T	G	G	T	G	G	G	G	T	T	T	A	G	G	G	G	G	C	A	N	G	T	G	G	T	T	G	G	G	G	T	G	G	G	G	T
G	G	T	C	T	A	G	T	T	T	G	A	G	A	C	T	T	C	T	T	T	T	C	G	G	T	T	T	T	T	T	T	T	N	A	C	G	T	C	G	T	T	T	T	G	T	A	A	T	C
A	A	C	A	G	A	T	G	A	C	A	A	T	G	G	G	C	G	C	C	C	C	G	A	A	G	C	C	C	C	C	C	G	N	G	G	T	C	G	A	C	C	C	C	A	C	A	G	C	G
G	G	A	G	A	G	G	G	C	G	G	G	G	C	T	G	G	T	G	G	G	G	T	G	G	G	G	G	G	G	G	A	G	N	A	T	G	G	T	G	G	G	G	G	G	G	G	A	G	T
A	A	T	A	G	N	A	C	G	T	A	G	A	A	A	T	T	A	T	T	T	T	A	A	A	C	T	T	T	T	T	T	C	N	C	A	A	T	A	A	T	T	T	T	A	T	G	C	T	A
C	C	G	A	A	N	G	T	G	A	C	C	G	G	G	G	A	G	A	A	A	A	G	C	C	T	A	A	A	A	A	G	T	N	A	G	G	A	G	C	A	A	A	A	C	A	C	A	A	G
A	A	G	C	C	N	A	A	T	G	A	A	A	A	T	A	G	T	G	G	G	G	T	A	A	A	G	G	G	G	G	G	A	N	C	T	A	G	T	A	G	G	G	G	A	G	A	C	G	T
C	C	T	T	A	N	C	C	C	T	C	T	C	A	G	G	T	G	T	T	T	T	G	C	C	C	T	T	T	T	T	T	C	N	T	G	C	T	G	C	T	T	T	T	C	T	T	T	T	G
T	T	C	C	C	N	A	C	G	G	T	T	A	C	G	A	G	G	G	G	G	G	G	T	T	C	G	G	G	G	G	C	C	N	T	G	A	G	G	T	G	G	G	G	T	G	T	T	G	G
T	T	A	G	T	N	C	C	T	G	T	C	C	T	T	C	G	T	G	G	G	G	T	T	T	C	G	G	G	G	G	A	C	N	G	T	C	G	T	T	G	G	G	G	T	G	C	G	G	T
G	G	T	A	T	N	T	T	A	T	G	A	T	C	G	A	T	G	T	T	T	T	G	G	G	T	T	T	T	T	T	T	T	N	G	G	T	T	G	G	T	T	T	T	G	T	A	G	T	G
G	G	G	A	G	N	T	C	G	G	G	G	T	G	A	C	G	A	G	G	G	G	A	G	G	C	G	G	G	G	G	G	C	N	T	A	T	G	A	G	G	G	G	G	G	G	G	T	G	A
T	T	T	G	G	N	G	T	T	A	T	T	G	A	G	T	A	G	A	A	A	A	G	T	T	T	A	A	A	A	A	T	T	N	G	G	G	A	G	T	A	A	A	A	T	A	T	G	A	G
G	G	T	G	T	N	G	T	G	G	G	A	G	A	A	T	G	A	G	G	G	G	A	G	G	T	G	G	G	G	G	T	T	N	T	A	G	G	A	G	G	G	G	G	G	G	A	T	G	A
T	T	A	C	G	N	T	G	G	A	T	C	T	G	C	G	A	C	A	A	A	A	C	T	T	G	A	A	A	A	A	A	G	N	C	C	T	A	C	T	A	A	A	A	T	A	C	C	A	C
C	C	T	A	T	N	G	A	T	C	C	G	G	G	A	G	C	A	C	C	C	C	A	C	C	A	C	C	C	C	C	T	A	N	C	A	G	C	A	C	C	C	C	C	C	C	G	C	C	A
C	C	G	T	C	N	T	G	G	A	C	G	T	C	C	T	A	C	A	A	A	A	C	C	C	G	A	A	A	A	A	G	G	N	T	C	T	A	C	C	A	A	A	A	C	A	G	T	A	C
T	T	G	T	C	N	C	T	A	C	T	T	C	A	T	G	C	T	C	C	C	C	T	T	T	T	C	C	C	C	C	G	T	N	T	T	C	C	T	T	C	C	C	C	T	C	T	T	C	T
T	T	T	C	T	N	C	G	G	T	T	C	C	T	T	T	T	T	T	T	T	T	T	T	T	G	T	T	T	T	T	T	G	N	G	T	C	T	T	T	T	T	T	T	T	T	C	G	T	T
G	G	T	A	T	N	T	C	A	T	G	G	T	T	G	C	T	G	T	T	T	T	G	G	G	C	T	T	T	T	T	T	C	N	T	G	T	T	G	G	T	T	T	T	G	T	G	T	T	G
T	T	G	G	G	N	T	A	C	G	T	T	T	C	G	C	G	G	G	G	G	G	G	T	T	A	G	G	G	G	G	G	A	N	C	G	T	A	G	T	G	G	G	A	T	G	T	C	G	G
C	C	A	T	T	N	G	T	A	G	C	A	G	A	T	T	G	T	G	G	G	G	T	C	C	T	G	G	G	G	G	A	T	N	C	T	G	G	T	C	G	G	G	G	C	G	A	C	G	T
C	C	G	A	C	N	T	T	C	T	C	G	T	G	G	T	T	G	T	T	T	T	G	C	C	T	T	T	T	T	T	G	T	N	C	G	T	T	G	C	T	T	T	T	C	T	G	C	T	G
C	C	C	C	C	N	C	A	T	G	C	T	C	T	T	G	G	T	G	G	G	G	T	C	C	A	G	G	G	G	G	C	A	N	T	T	C	G	T	C	G	G	G	G	C	G	T	T	G	T
T	T	T	G	C	N	C	A	T	T	T	G	C	A	C	T	T	C	T	T	T	T	C	T	T	A	T	T	T	T	T	T	A	N	C	C	C	T	C	T	T	T	T	T	T	T	G	C	T	C
C	C	G	G	T	N	C	A	G	C	C	G	C	C	C	C	C	T	C	C	C	C	C	C	C	A	C	C	C	C	C	G	A	N	A	C	C	C	C	C	C	C	C	C	C	C	G	A	C	C
A	A	G	T	C	N	T	G	G	C	A	T	T	G	T	C	C	T	C	C	C	C	T	A	A	G	C	C	C	C	C	G	G	N	T	T	T	C	T	A	C	C	C	C	A	C	T	T	C	T
T	T	T	C	A	N	C	A	T	T	T	G	C	G	T	C	T	T	T	T	T	T	T	T	T	A	T	T	T	T	T	T	A	N	G	T	C	T	T	T	T	T	T	T	T	T	G	G	T	T
G	G	A	G	T	N	A	C	G	T	G	A	A	T	G	T	T	G	T	T	T	T	G	G	G	C	T	T	T	T	T	A	C	N	T	G	A	T	G	G	T	T	T	T	G	T	A	T	T	G
T	T	G	T	G	N	T	C	T	G	T	G	T	C	T	C	G	T	G	G	G	G	T	T	T	C	G	G	G	G	G	G	C	N	G	T	T	G	T	T	G	G	G	G	T	G	G	G	G	T
G	G	C	A	T	N	G	T	C	T	G	A	G	G	C	A	T	C	T	T	T	T	C	G	G	T	T	T	T	T	T	C	T	N	G	C	G	T	C	G	T	T	T	T	G	T	A	G	T	C
G	G	A	G	G	N	T	T	C	C	G	C	T	T	C	T	C	C	C	C	C	C	C	G	G	T	C	C	C	C	C	A	T	N	G	C	T	C	C	G	C	C	C	C	G	C	C	G	C	C
G	G	G	T	G	N	G	C	T	C	G	A	G	A	C	G	C	C	C	C	C	C	C	G	G	C	C	C	C	C	C	G	C	N	C	C	G	C	C	G	C	C	C	C	G	C	A	C	C	C
C	C	A	G	G	N	G	T	T	C	C	C	G	G	T	T	C	T	C	C	C	C	T	C	C	T	C	C	C	C	C	A	T	N	G	T	G	C	T	C	C	C	C	C	C	C	C	G	C	T
G	G	A	G	C	N	G	A	G	T	G	T	G	T	C	G	T	C	T	T	T	T	C	G	G	A	T	T	T	T	T	A	A	N	A	C	G	T	C	G	T	T	T	T	G	T	T	A	T	C
A	A	C	T	G	N	C	G	T	C	A	T	C	G	A	G	C	A	C	C	C	C	A	A	A	G	C	C	C	C	C	C	G	N	A	A	C	C	A	A	C	C	C	C	A	C	T	A	C	A
A	A	T	G	A	N	G	C	C	A	A	G	G	G	T	G	A	T	A	A	A	A	T	A	A	C	A	A	A	A	A	T	C	N	A	T	G	A	T	A	A	A	A	A	A	A	G	A	A	T
A	A	C	A	A	N	A	A	C	T	A	G	A	T	G	C	T	G	T	T	T	T	G	A	A	A	T	T	T	T	T	C	A	N	T	G	A	T	G	A	T	T	T	T	A	T	G	T	T	G
T	T	G	G	A	N	A	C	C	G	T	T	A	G	T	G	G	T	G	G	G	G	T	T	T	C	G	G	G	G	G	G	C	N	A	T	A	G	T	T	G	G	G	G	T	G	T	A	G	T
A	A	A	A	T	N	A	G	T	T	A	G	A	A	G	A	T	G	T	T	T	T	G	A	A	G	T	T	T	T	T	A	G	N	C	G	A	T	G	A	T	T	T	T	A	T	G	C	T	G
C	C	A	C	A	N	T	T	C	G	C	T	T	G	G	A	G	G	G	G	G	G	G	C	C	T	G	G	G	G	G	A	T	N	C	G	T	G	G	C	G	G	G	G	C	G	T	C	G	G
C	C	G	A	C	N	A	G	A	G	C	C	A	A	G	A	G	G	G	G	G	G	G	C	C	G	G	G	G	G	G	G	G	N	A	G	A	G	G	C	G	G	G	G	C	G	C	A	G	G
A	A	G	C	C	N	C	C	T	G	A	C	C	C	C	T	G	C	G	G	G	G	C	A	A	C	G	G	G	G	G	G	C	N	G	C	C	G	C	A	G	G	G	G	A	G	C	G	G	C
G	G	C	T	A	N	C	T	G	C	G	T	C	A	G	A	C	G	C	C	C	C	G	G	G	T	C	C	C	C	C	C	T	N	T	G	C	C	G	G	C	C	C	C	G	C	T	T	C	G
T	T	A	T	G	N	A	G	T	G	T	T	A	C	A	C	G	A	G	G	G	G	A	T	T	G	G	G	G	G	G	A	G	N	G	A	A	G	A	T	G	G	G	G	T	G	T	G	G	A
G	G	T	G	T	N	G	G	G	A	G	G	G	T	A	C	A	A	A	A	A	A	A	G	G	G	A	A	A	A	A	T	G	N	G	A	G	A	A	G	A	A	A	A	G	A	G	G	A	A
G	G	T	G	G	N	T	T	G	A	G	T	T	T	A	A	A	A	A	A	A	A	A	G	G	T	A	A	A	A	A	T	T	N	C	A	T	A	A	G	A	A	A	A	G	A	T	C	A	A
C	C	C	T	G	N	G	A	G	A	C	C	G	G	T	G	A	T	A	A	A	A	T	C	C	A	A	A	A	A	A	C	A	N	T	T	G	A	T	C	A	A	A	A	C	A	C	T	A	T
T	T	A	G	C	N	G	A	C	T	T	C	G	G	A	T	T	A	T	T	T	T	A	T	T	A	T	T	T	T	T	A	A	N	T	A	G	T	A	T	T	T	T	T	T	T	C	T	T	A
T	T	G	T	T	N	C	A	G	A	T	C	C	T	C	G	A	C	A	A	A	A	C	T	T	A	A	A	A	A	A	G	A	N	A	C	C	A	C	T	A	A	A	A	T	A	C	A	A	C
A	A	T	C	T	N	T	G	A	C	A	T	T	G	C	G	C	C	C	C	C	C	C	A	A	G	C	C	C	C	C	T	G	N	C	C	T	C	C	A	C	C	C	C	A	C	T	C	C	C
C	C	A	C	A	N	T	C	A	C	C	C	T	T	A	C	C	A	C	C	C	C	A	C	C	C	C	C	C	C	C	A	C	N	C	A	T	C	A	C	C	C	C	C	C	C	C	C	C	A
C	C	C	T	C	N	A	T	A	A	C	A	A	C	G	T	A	G	A	A	A	A	G	C	C	T	A	A	A	A	A	C	T	N	G	G	A	A	G	C	A	A	A	A	C	A	A	G	A	G
G	G	G	T	C	N	C	T	T	G	G	T	C	C	T	T	G	T	G	G	G	G	T	G	G	T	G	G	G	G	G	G	T	N	C	T	C	G	T	G	G	G	G	G	G	G	T	C	G	T
C	C	G	G	G	N	C	C	A	T	C	G	C	T	G	A	T	G	T	T	T	T	G	C	C	C	T	T	T	T	T	G	C	N	A	G	C	T	G	C	T	T	T	T	C	T	G	A	T	G
A	A	T	T	C	N	G	A	C	G	A	T	G	T	G	C	G	G	G	G	G	G	G	A	A	A	G	G	G	G	G	T	A	N	A	G	G	G	G	A	G	G	G	G	A	G	T	A	G	G
A	A	C	C	A	N	C	T	C	G	A	G	C	G	C	C	G	C	G	G	G	G	C	A	A	T	G	G	G	G	G	C	T	N	G	C	C	G	C	A	G	G	G	G	A	G	G	G	G	C
G	G	G	C	A	N	A	G	A	C	G	G	A	T	T	G	C	T	C	C	C	C	T	G	G	G	C	C	C	C	C	G	G	N	G	T	A	C	T	G	C	C	C	C	G	C	G	G	C	T
G	G	T	C	G	N	A	C	G	T	G	G	A	C	T	C	T	T	T	T	T	T	T	G	G	C	T	T	T	T	T	T	C	N	T	T	A	T	T	G	T	T	T	T	G	T	G	T	T	T
T	T	A	T	G	N	G	A	T	T	T	C	G	C	A	A	T	A	T	T	T	T	A	T	T	A	T	T	T	T	T	A	A	N	T	A	G	T	A	T	T	T	T	T	T	T	C	T	T	A
T	T	G	C	T	N	G	C	G	A	T	G	G	C	C	A	A	C	A	A	A	A	C	T	T	C	A	A	A	A	A	G	C	N	C	C	G	A	C	T	A	A	A	A	T	A	G	C	A	C
C	C	T	A	T	N	T	T	G	C	C	A	T	T	C	G	C	C	C	C	C	C	C	C	C	T	C	C	C	C	C	T	T	N	T	C	T	C	C	C	C	C	C	C	C	C	A	T	C	C
T	T	G	T	C	N	T	T	C	C	T	A	T	C	G	G	C	G	C	C	C	C	G	T	T	T	C	C	C	C	C	G	T	N	T	G	T	C	G	T	C	C	C	C	T	C	A	T	C	G
T	T	G	G	T	N	C	T	T	G	T	A	C	A	C	T	G	C	G	G	G	G	C	T	T	T	G	G	G	G	G	G	T	N	C	C	C	G	C	T	G	G	G	G	T	G	A	C	G	C
C	C	T	T	T	N	T	G	T	C	C	T	T	T	A	T	C	A	C	C	C	C	A	C	C	G	C	C	C	C	C	T	G	N	T	A	T	C	A	C	C	C	C	C	C	C	T	T	C	A
T	T	G	G	C	N	T	T	A	A	T	A	T	G	A	C	A	A	A	A	A	A	A	T	T	T	A	A	A	A	A	G	T	N	T	A	T	A	A	T	A	A	A	A	T	A	A	T	A	A
T	T	A	G	T	N	C	C	C	A	T	C	C	T	G	T	A	G	A	A	A	A	G	T	T	C	A	A	A	A	A	A	C	N	C	G	C	A	G	T	A	A	A	A	T	A	C	C	A	G
C	C	G	G	T	N	T	C	C	G	C	C	T	G	G	T	G	G	G	G	G	G	G	C	C	C	G	G	G	G	G	G	C	N	G	G	T	G	G	C	G	G	G	G	C	G	C	G	G	G
G	G	A	C	C	N	T	G	G	G	G	A	T	G	T	C	G	T	G	G	G	G	T	G	G	G	G	G	G	G	G	A	G	N	T	T	T	G	T	G	G	G	G	G	G	G	A	T	G	T
T	T	C	G	G	N	C	A	C	T	T	G	C	G	T	T	T	T	T	T	T	T	T	T	T	A	T	T	T	T	T	C	A	N	A	T	C	T	T	T	T	T	T	T	T	T	G	A	T	T
A	A	A	A	T	N	G	A	A	T	A	T	G	C	C	T	T	C	T	T	T	T	C	A	A	A	T	T	T	T	T	A	A	N	A	C	G	T	C	A	T	T	T	T	A	T	T	A	T	C
A	A	C	A	A	N	T	C	A	C	A	G	T	G	T	C	C	T	C	C	C	C	T	A	A	C	C	C	C	C	C	C	C	N	G	T	T	C	T	A	C	C	C	C	A	C	G	G	C	T
G	G	T	A	A	N	A	A	G	T	G	G	A	A	T	G	T	T	T	T	T	T	T	G	G	A	T	T	T	T	T	T	A	N	A	T	A	T	T	G	T	T	T	T	G	T	G	A	T	T
A	A	T	T	G	N	A	A	G	T	A	C	A	A	C	T	T	C	T	T	T	T	C	A	A	A	T	T	T	T	T	T	A	N	A	C	A	T	C	A	T	T	T	T	A	T	C	A	T	C
A	A	G	A	A	N	G	C	T	C	A	T	G	A	T	A	C	T	C	C	C	C	T	A	A	C	C	C	C	C	C	G	C	N	C	T	G	C	T	A	C	C	C	C	A	C	T	C	C	T
C	C	G	C	A	N	A	T	T	T	C	T	A	T	T	A	T	T	T	T	T	T	T	C	C	T	T	T	T	T	T	G	T	N	G	T	A	T	T	C	T	T	T	T	C	T	T	G	T	T
G	G	T	C	C	N	A	G	C	T	G	A	A	A	C	G	T	C	T	T	T	T	C	G	G	G	T	T	T	T	T	T	G	N	G	C	A	T	C	G	T	T	T	T	G	T	A	G	T	C
G	G	G	A	G	N	C	G	T	C	G	C	C	C	G	A	C	G	C	C	C	C	G	G	G	G	C	C	C	C	C	G	G	N	T	G	C	C	G	G	C	C	C	C	G	C	C	T	C	G
T	T	T	G	G	N	G	A	T	G	T	C	G	C	T	A	G	T	G	G	G	G	T	T	T	A	G	G	G	G	G	T	A	N	A	T	G	G	T	T	G	G	G	G	T	G	C	A	G	T
A	A	C	T	T	N	G	C	C	T	A	G	G	A	A	C	T	A	T	T	T	T	A	A	A	C	T	T	T	T	T	C	C	N	A	A	G	T	A	A	T	T	T	T	A	T	G	A	T	A
A	A	C	G	A	N	T	T	T	A	A	C	T	G	A	G	A	A	A	A	A	A	A	A	A	T	A	A	A	A	A	C	T	N	T	A	T	A	A	A	A	A	A	A	A	A	C	T	A	A
T	T	T	G	A	N	A	T	T	A	T	A	A	T	G	G	A	G	A	A	A	A	G	T	T	T	A	A	A	A	A	T	T	N	A	G	A	A	G	T	A	A	A	A	T	A	A	A	A	G
A	A	T	C	T	N	A	T	C	G	A	A	A	G	A	T	G	A	G	G	G	G	A	A	A	T	G	G	G	G	G	T	T	N	A	A	A	G	A	A	G	G	G	G	A	G	A	A	G	A
A	A	G	T	A	N	T	A	G	A	A	G	T	G	A	A	A	A	A	A	A	A	A	A	A	A	A	A	A	A	A	G	A	N	A	A	T	A	A	A	A	A	A	A	A	A	G	A	A	A
A	A	T	T	A	N	A	T	T	A	A	G	A	C	C	A	A	C	A	A	A	A	C	A	A	T	A	A	A	A	A	T	T	N	G	C	A	A	C	A	A	A	A	A	A	A	G	G	A	C
G	G	C	A	A	N	A	T	A	C	G	T	A	T	G	T	C	G	C	C	C	C	G	G	G	T	C	C	C	C	C	C	T	N	G	G	A	C	G	G	C	C	C	C	G	C	T	G	C	G
G	G	C	C	G	N	A	G	A	G	G	T	A	T	G	A	G	G	G	G	G	G	G	G	G	G	G	G	G	G	G	C	G	N	A	G	A	G	G	G	G	G	G	G	G	G	T	A	G	G
A	A	C	C	G	N	G	A	G	G	A	C	G	A	T	A	G	T	G	G	G	G	T	A	A	A	G	G	G	G	G	C	A	N	G	T	G	G	T	A	G	G	G	G	A	G	C	G	G	T
G	G	T	G	A	N	G	C	A	T	G	T	G	C	A	A	T	A	T	T	T	T	A	G	G	C	T	T	T	T	T	T	C	N	C	A	G	T	A	G	T	T	T	T	G	T	T	C	T	A
C	C	C	C	G	N	A	A	A	A	C	T	A	C	A	G	A	A	A	A	A	A	A	C	C	A	A	A	A	A	A	C	A	N	T	A	A	A	A	C	A	A	A	A	C	A	T	T	A	A
T	T	A	A	C	N	G	C	C	A	T	C	G	G	T	G	A	T	A	A	A	A	T	T	T	C	A	A	A	A	A	A	C	N	G	T	G	A	T	T	A	A	A	A	T	A	C	G	A	T
G	G	T	A	T	N	C	T	G	T	G	T	C	C	A	A	T	A	T	T	T	T	A	G	G	T	T	T	T	T	T	T	T	N	G	A	C	T	A	G	T	T	T	T	G	T	T	G	T	A
G	G	G	G	G	N	T	A	G	A	G	T	T	A	A	G	A	A	A	A	A	A	A	G	G	A	A	A	A	A	A	G	A	N	T	A	T	A	A	G	A	A	A	A	G	A	T	T	A	A
T	T	T	G	G	N	G	A	T	A	T	C	G	A	A	C	A	A	A	A	A	A	A	T	T	A	A	A	A	A	A	T	A	N	G	A	G	A	A	T	A	A	A	A	T	A	C	G	A	A
G	G	G	T	T	N	G	G	A	A	G	G	G	G	G	T	A	G	A	A	A	A	G	G	G	G	A	A	A	A	A	G	G	N	G	G	G	A	G	G	A	A	A	A	G	A	G	G	A	G
G	G	G	T	G	N	T	A	A	G	G	T	T	G	G	G	G	G	G	G	G	G	G	G	G	A	G	G	G	G	G	G	A	N	C	G	T	G	G	G	G	G	G	G	G	G	T	C	G	G
C	C	G	C	G	N	G	G	T	G	C	A	G	T	A	G	G	A	G	G	G	G	A	C	C	G	G	G	G	G	G	G	G	N	C	A	G	G	A	C	G	G	G	G	C	G	A	C	G	A
C	C	C	T	C	N	G	G	A	A	C	A	G	T	G	T	A	G	A	A	A	A	G	C	C	G	A	A	A	A	A	C	G	N	A	G	G	A	G	C	A	A	A	A	C	A	A	A	A	G
A	A	G	T	C	N	C	G	A	G	A	G	C	C	C	G	G	C	G	G	G	G	C	A	A	G	G	G	G	G	G	G	G	N	T	C	C	G	C	A	G	G	G	G	A	G	G	T	G	C
T	T	A	C	A	N	C	G	A	C	T	A	C	T	T	G	C	T	C	C	C	C	T	T	T	G	C	C	C	C	C	A	G	N	A	T	C	C	T	T	C	C	C	C	T	C	A	A	C	T
A	A	A	T	T	N	A	T	G	T	A	A	A	T	G	C	T	G	T	T	T	T	G	A	A	T	T	T	T	T	T	A	T	N	G	G	A	T	G	A	T	T	T	T	A	T	A	G	T	G
G	G	A	T	A	N	T	G	G	G	G	C	T	C	G	C	G	G	G	G	G	G	G	G	G	G	G	G	G	G	G	A	G	N	T	G	T	G	G	G	G	G	G	G	G	G	C	T	G	G
T	T	T	C	G	N	A	T	A	G	T	G	A	T	T	A	G	T	G	G	G	G	T	T	T	T	G	G	G	G	G	T	T	N	T	T	A	G	T	T	G	G	G	G	T	G	G	T	G	T
T	T	A	G	T	N	G	A	G	T	T	G	G	T	G	T	T	G	T	T	T	T	G	T	T	A	T	T	T	T	T	A	A	N	A	G	G	T	G	T	T	T	T	T	T	T	G	A	T	G
A	A	C	T	T	N	T	T	C	G	A	T	T	C	G	A	G	G	G	G	G	G	G	A	A	T	G	G	G	G	G	C	T	N	C	G	T	G	G	A	G	G	G	G	A	G	T	C	G	G
C	C	C	A	A	N	T	A	T	G	C	A	T	G	C	G	G	C	G	G	G	G	C	C	C	A	G	G	G	G	G	C	A	N	G	C	T	G	C	C	G	G	G	G	C	G	A	G	G	C
G	G	A	A	C	N	A	C	G	C	G	A	A	T	C	T	C	C	C	C	C	C	C	G	G	C	C	C	C	C	C	A	C	N	G	C	A	C	C	G	C	C	C	C	G	C	A	G	C	C
G	G	G	G	G	N	C	T	G	C	G	T	C	A	A	T	C	A	C	C	C	C	A	G	G	T	C	C	C	C	C	G	T	N	C	A	C	C	A	G	C	C	C	C	G	C	T	C	C	A
C	C	T	A	G	N	G	G	T	A	C	A	G	A	T	A	A	T	A	A	A	A	T	C	C	G	A	A	A	A	A	T	G	N	G	T	G	A	T	C	A	A	A	A	C	A	A	G	A	T
G	G	G	A	C	N	G	C	G	T	G	A	G	G	A	C	T	A	T	T	T	T	A	G	G	C	T	T	T	T	T	G	C	N	C	A	G	T	A	G	T	T	T	T	G	T	A	C	T	A
C	C	G	C	G	N	C	T	G	A	C	A	C	A	G	G	A	G	A	A	A	A	G	C	C	T	A	A	A	A	A	G	T	N	C	G	C	A	G	C	A	A	A	A	C	A	A	C	A	G
C	C	C	G	C	N	G	G	C	G	C	G	G	A	T	G	G	T	G	G	G	G	T	C	C	G	G	G	G	G	G	C	G	N	G	T	G	G	T	C	G	G	G	G	C	G	G	G	G	T
G	G	T	G	C	N	C	C	C	T	G	G	C	C	T	C	T	T	T	T	T	T	T	G	G	C	T	T	T	T	T	T	C	N	A	T	C	T	T	G	T	T	T	T	G	T	G	A	T	T
A	A	T	T	G	N	C	C	A	T	A	A	C	G	A	G	T	A	T	T	T	T	A	A	A	C	T	T	T	T	T	T	C	N	T	A	C	T	A	A	T	T	T	T	A	T	A	T	T	A
T	T	A	A	A	N	G	G	T	A	T	G	G	G	C	C	A	C	A	A	A	A	C	T	T	G	A	A	A	A	A	A	G	N	C	C	G	A	C	T	A	A	A	A	T	A	G	C	A	C
C	C	C	A	T	N	A	T	A	C	C	C	A	T	G	C	C	G	C	C	C	C	G	C	C	T	C	C	C	C	C	C	T	N	T	G	A	C	G	C	C	C	C	C	C	C	C	T	C	G
T	T	C	T	C	N	T	G	G	G	T	T	T	A	G	G	G	G	G	G	G	G	G	T	T	G	G	G	G	G	G	C	G	N	A	G	T	G	G	T	G	G	G	G	T	G	T	A	G	G
A	A	G	A	T	N	C	A	T	G	A	G	C	A	C	A	G	C	G	G	G	G	C	A	A	A	G	G	G	G	G	G	A	N	A	C	C	G	C	A	G	G	G	G	A	G	G	A	G	C
A	A	C	A	A	N	T	A	T	C	A	G	T	T	G	T	C	G	C	C	C	C	G	A	A	A	C	C	C	C	C	C	A	N	A	G	T	C	G	A	C	C	C	C	A	C	G	A	C	G
A	A	A	A	A	N	A	C	A	G	A	T	A	A	C	C	G	C	G	G	G	G	C	A	A	C	G	G	G	G	G	A	C	N	G	C	A	G	C	A	G	G	G	G	A	G	T	G	G	C
G	G	A	G	A	N	A	A	C	C	G	G	A	A	C	T	C	C	C	C	C	C	C	G	G	A	C	C	C	C	C	A	A	N	T	C	A	C	C	G	C	C	C	C	G	C	G	T	C	C
T	T	G	G	G	N	A	T	G	C	T	G	A	A	G	A	C	G	C	C	C	C	G	T	T	T	C	C	C	C	C	G	T	N	C	G	A	C	G	T	C	C	C	C	T	C	G	C	C	G
C	C	G	A	T	N	G	G	G	G	C	C	G	G	A	A	G	A	G	G	G	G	A	C	C	G	G	G	G	G	G	G	G	N	A	A	G	G	A	C	G	G	G	G	C	G	C	A	G	A
A	A	T	G	C	N	T	A	C	A	A	C	T	G	T	A	A	T	A	A	A	A	T	A	A	A	A	A	A	A	A	T	A	N	T	T	T	A	T	A	A	A	A	A	A	A	C	T	A	T
T	T	T	C	A	N	C	G	G	T	T	A	C	A	C	G	T	C	T	T	T	T	C	T	T	G	T	T	T	T	T	T	G	N	T	C	C	T	C	T	T	T	T	T	T	T	A	T	T	C
T	T	C	T	T	N	A	C	C	C	T	T	A	G	T	T	C	T	C	C	C	C	T	T	T	C	C	C	C	C	C	C	C	N	T	T	A	C	T	T	C	C	C	C	T	C	T	T	C	T
T	T	T	G	T	N	T	A	C	T	T	A	T	C	A	C	T	A	T	T	T	T	A	T	T	A	T	T	T	T	T	T	A	N	G	A	T	T	A	T	T	T	T	T	T	T	A	G	T	A
G	G	T	G	T	N	T	T	G	A	G	G	T	T	A	A	A	A	A	A	A	A	A	G	G	T	A	N	A	A	A	T	T	N	A	A	T	A	A	G	A	A	A	A	G	A	G	A	A	A
A	A	C	T	G	N	T	G	A	A	A	T	T	G	A	T	A	A	A	A	A	A	A	A	A	G	A	N	A	A	A	C	G	N	C	A	T	A	A	A	A	A	A	A	A	A	T	C	A	A
C	C	T	G	A	N	G	A	T	A	C	T	G	G	G	T	A	G	A	A	A	A	G	C	C	A	A	N	A	A	A	T	A	G	T	G	G	A	G	C	A	A	A	A	C	A	T	T	A	G
T	T	T	G	C	N	A	A	C	G	T	A	A	T	T	T	G	T	G	G	G	G	T	T	T	A	G	N	G	G	G	T	A	A	T	T	A	G	T	T	G	G	G	G	T	G	A	T	G	T
T	T	C	C	T	N	C	A	T	T	T	C	C	G	C	G	T	C	T	T	T	T	C	T	T	A	T	N	T	T	T	C	A	C	A	C	C	T	C	T	T	T	T	T	T	T	C	A	T	C
A	A	G	C	T	N	T	T	A	C	A	G	T	G	A	A	C	A	C	C	C	C	A	A	A	T	C	N	C	C	C	G	T	T	G	A	T	C	A	A	C	C	C	C	A	C	G	G	C	A
G	G	T	A	A	N	T	T	A	A	G	G	T	C	T	C	A	T	A	A	A	A	T	G	G	T	A	N	A	A	A	T	T	A	G	T	T	A	T	G	A	A	A	A	G	A	G	G	A	T
G	G	A	T	G	N	A	G	A	T	G	C	A	C	T	T	T	T	T	T	T	T	T	G	G	G	T	N	T	T	T	A	G	A	C	T	A	T	T	G	T	T	T	T	G	T	C	C	T	T
C	C	A	A	G	N	G	C	G	T	C	G	G	A	T	T	T	T	T	T	T	T	T	C	C	C	T	N	T	T	T	A	C	A	G	T	G	T	T	C	T	T	T	T	C	T	G	G	T	T
G	G	G	G	C	N	G	T	T	T	G	C	G	T	G	A	T	G	T	T	T	T	G	G	G	T	T	N	T	T	T	G	T	G	A	G	G	T	G	G	T	T	T	T	G	T	C	A	T	G
A	A	A	T	G	N	C	T	C	G	A	C	C	A	A	G	G	A	G	G	G	G	A	A	A	T	G	G	G	G	G	A	T	A	C	A	C	G	A	A	G	G	G	G	A	G	C	C	G	A
C	C	A	T	A	N	G	G	A	A	C	G	G	G	C	G	A	C	A	A	A	A	C	C	C	G	A	A	A	A	A	A	G	A	G	C	G	A	C	C	A	A	A	A	C	A	G	G	A	C
G	G	C	A	C	N	A	G	T	C	G	A	A	T	T	C	C	T	C	C	C	C	T	G	G	G	C	C	C	C	C	C	G	G	A	T	A	C	T	G	C	C	C	C	G	C	A	A	C	T
A	A	G	C	G	N	C	T	T	T	A	T	C	T	T	G	T	T	T	T	T	T	T	A	A	T	T	T	T	T	T	G	T	G	G	T	C	T	T	A	T	T	T	T	A	T	T	G	T	T
G	G	G	G	A	N	G	A	T	T	G	C	G	A	A	A	T	A	T	T	T	T	A	G	G	A	T	T	T	T	T	G	A	T	C	A	G	T	A	G	T	T	T	T	G	T	C	C	T	A
C	C	T	G	G	N	A	C	G	A	C	T	A	C	G	C	A	G	A	A	A	A	G	C	C	C	A	A	A	A	A	T	C	G	T	G	A	A	G	C	A	A	A	A	C	A	T	T	A	G
T	T	A	C	C	N	G	A	A	G	T	A	G	G	G	G	G	G	G	G	G	G	G	T	T	A	G	G	G	G	G	A	A	C	T	G	G	G	G	T	G	G	G	G	T	G	A	T	G	G
T	T	A	G	T	N	C	C	C	G	T	A	C	G	C	A	G	C	G	G	G	G	C	T	T	C	G	G	G	G	G	A	C	C	G	C	C	G	C	T	G	G	G	G	T	G	A	G	G	C
G	G	T	C	T	N	T	G	T	C	G	A	T	C	G	G	C	G	C	C	C	C	G	G	G	G	C	C	C	C	C	T	G	A	G	G	T	C	G	G	C	C	C	C	G	C	A	G	C	G
G	G	A	C	G	N	T	G	T	G	G	G	T	G	A	C	G	A	G	G	G	G	A	G	G	G	G	G	G	G	G	A	G	C	C	A	T	G	A	G	G	G	G	G	G	G	G	C	G	A
C	C	A	G	G	N	G	A	A	A	C	T	G	C	C	T	A	C	A	A	A	A	C	C	C	A	A	A	A	A	A	A	A	T	A	C	G	A	C	C	A	A	A	A	C	A	T	A	A	C
A	A	A	A	C	N	G	A	G	C	A	C	G	C	G	T	C	G	C	C	C	C	G	A	A	A	C	C	C	C	C	A	A	A	C	G	G	C	G	A	C	C	C	C	A	C	C	C	C	G
C	C	G	T	A	N	C	C	G	G	C	A	C	G	A	G	G	A	G	G	G	G	A	C	C	C	G	G	G	G	G	G	C	C	T	A	C	G	A	C	G	G	G	G	C	G	A	T	G	A
T	T	G	C	C	N	A	G	C	A	T	T	A	A	G	G	A	G	A	A	A	A	G	T	T	G	A	A	A	A	A	G	G	T	G	G	A	A	G	T	A	A	A	A	T	A	T	G	A	G
G	G	A	T	T	N	C	T	G	G	G	T	C	T	C	C	G	C	G	G	G	G	C	G	G	T	G	G	G	G	G	A	T	T	A	C	C	G	C	G	G	G	G	G	G	G	T	A	G	C
A	A	G	A	G	N	T	T	A	C	A	T	T	C	T	A	C	T	C	C	C	C	T	A	A	T	C	C	C	C	C	G	T	G	T	T	T	C	T	A	C	C	C	C	A	C	T	T	C	T
T	T	C	A	A	N	G	C	C	T	T	G	G	T	T	C	T	T	T	T	T	T	T	T	T	C	T	T	T	T	T	C	C	T	C	T	G	T	T	T	T	T	T	T	T	T	G	C	T	T
C	C	T	A	T	N	A	T	G	T	C	A	A	A	G	T	T	G	T	T	T	T	G	C	C	T	T	T	T	T	T	T	T	G	C	G	A	T	G	C	T	T	T	T	C	T	A	C	T	G
C	C	G	G	C	N	T	G	A	G	C	C	T	A	G	G	G	G	G	G	G	G	G	C	C	G	G	G	G	G	G	G	G	G	T	G	T	G	G	C	G	G	G	G	C	G	C	T	G	G
T	T	G	T	C	N	C	A	G	G	T	T	C	A	C	A	G	C	G	G	G	G	C	T	T	A	G	G	G	G	G	G	A	T	T	C	C	G	C	T	G	G	G	G	T	G	T	T	G	C
T	T	T	C	T	N	C	A	C	C	T	T	C	G	A	T	C	A	C	C	C	C	A	T	T	A	C	C	C	C	C	T	A	T	A	A	C	C	A	T	C	C	C	C	T	C	T	A	C	A
A	A	G	A	T	N	T	A	T	A	A	A	T	T	C	C	A	C	A	A	A	A	C	A	A	A	A	A	A	A	A	G	A	A	T	C	T	A	C	A	A	A	A	A	A	A	A	T	A	C
T	T	G	T	A	N	T	A	T	C	T	G	T	C	T	C	C	T	C	C	C	C	T	T	T	A	C	C	C	C	C	G	A	C	G	T	T	C	T	T	C	C	C	C	T	C	G	G	C	T
G	G	C	T	T	N	A	G	G	T	G	G	A	A	G	T	T	G	T	T	T	T	G	G	G	G	T	T	T	T	T	C	G	T	A	G	A	T	G	G	T	T	T	T	G	T	G	A	T	G
A	A	C	T	G	N	T	A	G	G	A	C	T	T	A	T	G	A	G	G	G	G	A	A	A	A	G	G	G	G	G	C	A	T	A	A	T	G	A	A	G	G	G	G	A	G	C	A	G	A
A	A	A	G	A	N	G	G	C	A	A	G	G	T	T	A	A	T	A	A	A	A	T	A	A	G	A	A	A	A	A	A	G	A	G	T	G	A	T	A	A	A	A	A	A	A	G	G	A	T
G	G	T	A	A	C	A	C	A	T	G	A	A	T	C	T	T	C	T	T	T	T	C	G	G	C	T	T	T	T	T	T	C	C	A	C	A	T	C	G	T	T	T	T	G	T	A	A	T	C
A	A	A	C	G	T	A	T	C	C	A	C	A	G	C	G	C	C	C	C	C	C	C	A	A	T	C	C	C	C	C	A	T	C	T	C	A	C	C	A	C	C	C	C	A	C	C	T	C	C
T	T	G	T	A	C	G	A	T	C	T	G	G	A	T	A	C	T	C	C	C	C	T	T	T	A	C	C	C	C	C	G	A	C	T	T	G	C	T	T	C	C	C	C	T	C	G	T	C	T
T	T	T	T	T	G	A	T	G	T	T	A	A	C	T	A	T	T	T	T	T	T	T	T	T	T	T	T	T	T	T	T	T	C	T	T	A	T	T	T	T	T	T	T	T	T	A	T	T	T
T	T	T	A	T	C	T	G	A	T	T	G	T	T	A	G	T	A	T	T	T	T	A	T	T	G	T	T	T	T	T	T	G	A	T	A	T	T	A	T	T	T	T	T	T	T	G	T	T	A
T	T	A	G	T	T	T	A	T	A	T	C	T	T	T	A	A	T	A	A	A	A	T	T	T	A	A	A	A	A	A	A	A	A	C	T	T	A	T	T	A	A	A	A	T	A	C	C	A	T
C	C	C	G	T	A	T	A	C	T	C	T	T	A	G	T	T	G	T	T	T	T	G	C	C	A	T	T	T	T	T	C	A	A	A	G	T	T	G	C	T	T	T	T	C	T	T	A	T	G
A	A	G	C	C	T	T	T	C	G	A	T	T	G	A	T	G	A	G	G	G	G	A	A	A	T	G	G	G	G	G	G	T	A	A	A	T	G	A	A	G	G	G	G	A	G	T	A	G	A
A	A	G	G	A	G	C	T	T	A	A	G	C	G	A	T	A	A	A	A	A	A	A	A	A	T	A	A	A	A	A	G	T	T	G	A	C	A	A	A	A	A	A	A	A	A	G	G	A	A
G	G	C	A	A	T	A	G	T	A	G	G	A	C	G	T	A	G	A	A	A	A	G	G	G	G	A	A	A	A	A	C	G	G	A	G	A	A	G	G	A	A	A	A	G	A	G	A	A	G
A	A	G	C	G	C	A	C	A	G	A	C	A	G	A	C	G	A	G	G	G	G	A	A	A	C	G	G	G	G	G	G	C	C	A	A	A	G	A	A	G	G	G	G	A	G	C	A	G	A
A	A	C	G	A	G	G	A	T	A	A	A	G	A	T	A	A	T	A	A	A	A	T	A	A	A	A	A	A	A	A	C	A	T	A	T	G	A	T	A	A	A	A	A	A	A	A	A	A	T
A	A	C	A	A	A	A	G	G	T	A	C	A	C	T	A	T	T	T	T	T	T	T	A	A	G	T	T	T	T	T	C	G	G	A	T	A	T	T	A	T	T	T	T	A	T	C	A	T	T
A	A	G	G	A	T	A	A	A	T	A	T	A	G	T	G	T	T	T	T	T	T	T	A	A	A	T	T	T	T	T	G	A	T	C	T	A	T	T	A	T	T	T	T	A	T	T	C	T	T
C	C	A	C	A	A	A	C	A	T	C	G	A	A	T	A	T	T	T	T	T	T	T	C	C	C	T	T	T	T	T	A	C	T	T	T	A	T	T	C	T	T	T	T	C	T	G	T	T	T
T	T	T	T	C	A	A	A	G	T	T	A	A	G	C	A	T	C	T	T	T	T	C	T	T	A	T	T	T	T	T	T	A	G	G	C	A	T	C	T	T	T	T	T	T	T	A	G	T	C
G	G	C	T	T	C	C	C	A	C	G	T	C	C	A	A	C	A	C	C	C	C	A	G	G	C	C	C	C	C	C	C	C	T	G	A	C	C	A	G	C	C	C	C	G	C	T	G	C	A
G	G	T	G	G	A	T	C	T	A	G	C	T	T	A	A	A	A	A	A	A	A	A	G	G	C	A	A	A	A	A	T	C	T	A	A	T	A	A	G	A	A	A	A	G	A	C	A	A	A
A	A	A	G	G	A	G	T	T	A	A	C	G	T	G	C	A	G	A	A	A	A	G	A	A	T	A	A	A	A	A	A	T	A	A	G	G	A	G	A	A	A	A	A	A	A	C	A	A	G
A	A	A	C	A	C	G	T	T	G	A	T	G	G	A	T	G	A	G	G	G	G	A	A	A	T	G	G	G	G	G	A	T	A	C	A	G	G	A	A	G	G	G	G	A	G	T	C	G	A
C	C	A	A	A	T	A	T	T	A	C	T	A	G	A	G	A	A	A	A	A	A	A	C	C	T	A	A	A	A	A	A	T	A	A	A	A	A	A	C	A	A	A	A	C	A	T	A	A	A
A	A	G	C	C	T	A	T	C	A	A	A	A	C	A	G	A	A	A	A	A	A	A	A	A	T	A	A	A	A	A	G	T	A	C	A	A	A	A	A	A	A	A	A	A	A	A	C	A	A
C	C	T	T	A	C	C	G	A	A	C	T	C	A	A	A	A	A	A	A	A	A	A	C	C	G	A	A	A	A	A	T	G	T	T	A	C	A	A	C	A	A	A	A	C	A	T	T	A	A
T	T	C	G	C	T	A	A	A	A	T	G	A	C	C	A	A	C	A	A	A	A	C	T	T	A	A	A	A	A	A	C	A	T	A	C	A	A	C	T	A	A	A	A	T	A	G	A	A	C
A	A	A	A	T	G	C	A	G	C	A	A	C	T	T	C	C	T	C	C	C	C	T	A	A	A	C	C	C	C	C	A	A	T	A	T	C	C	T	A	C	C	C	C	A	C	A	A	C	T
A	A	T	T	A	T	T	A	A	T	A	A	T	G	G	A	T	G	T	T	T	T	G	A	A	A	T	T	T	T	T	T	A	A	A	G	T	T	G	A	T	T	T	T	A	T	A	A	T	G
A	A	T	C	A	G	A	T	A	G	A	G	A	A	G	C	G	G	G	G	G	G	G	A	A	T	G	G	G	G	G	T	T	T	C	G	A	G	G	A	G	G	G	G	A	G	G	C	G	G
C	C	T	C	A	G	A	T	A	G	C	A	A	T	A	T	G	A	G	G	G	G	A	C	C	T	G	G	G	G	G	T	T	T	A	A	A	G	A	C	G	G	G	G	C	G	A	A	G	A
A	A	G	T	C	C	A	A	A	A	A	T	A	C	A	A	A	A	A	A	A	A	A	A	A	A	A	A	A	A	A	G	A	G	T	A	A	A	A	A	A	A	A	A	A	A	T	T	A	A
T	T	A	T	A	C	C	A	C	A	T	T	C	C	C	A	A	C	A	A	A	A	C	T	T	A	A	A	A	A	A	A	A	T	A	C	C	A	C	T	A	A	A	A	T	A	T	A	A	C
A	A	C	A	T	C	A	A	T	C	A	T	A	T	A	A	C	A	C	C	C	C	A	A	A	A	C	C	C	C	C	C	A	C	G	A	A	C	A	A	C	C	C	C	A	C	T	G	C	A
G	G	T	T	A	T	T	T	G	A	G	T	T	T	C	C	A	C	A	A	A	A	C	G	G	T	A	A	A	A	A	T	T	C	C	C	T	A	C	G	A	A	A	A	G	A	T	C	A	C
C	C	T	G	G	G	A	T	G	C	C	C	A	A	T	A	C	T	C	C	C	C	T	C	C	T	C	C	C	C	C	T	T	A	A	T	A	C	T	C	C	C	C	C	C	C	C	A	C	T
A	A	A	A	C	A	G	G	A	T	A	A	G	T	A	T	T	A	T	T	T	T	A	A	A	G	T	T	T	T	T	A	G	G	G	A	G	T	A	A	T	T	T	T	A	T	A	G	T	A
G	G	G	A	A	T	C	G	A	A	G	A	C	G	A	A	A	A	A	A	A	A	A	G	G	G	A	A	A	A	A	G	G	C	T	A	C	A	A	G	A	A	A	A	G	A	A	T	A	A
T	T	G	G	G	G	A	C	C	A	T	G	A	A	A	G	A	A	A	A	A	A	A	T	T	C	A	A	A	A	A	G	C	A	G	A	A	A	A	T	A	A	A	A	T	A	G	G	A	A
G	G	C	A	T	G	G	A	A	A	G	A	G	A	C	C	A	C	A	A	A	A	C	G	G	A	A	A	A	A	A	C	A	T	G	C	G	A	C	G	A	A	A	A	G	A	A	G	A	C
G	G	G	T	G	C	T	A	C	C	G	A	T	G	A	A	C	A	C	C	C	C	A	G	G	A	C	C	C	C	C	G	A	G	T	A	T	C	A	G	C	C	C	C	G	C	A	T	C	A
T	T	A	T	G	T	G	A	T	A	T	A	G	A	T	G	A	T	A	A	A	A	T	T	T	A	A	A	A	A	A	A	A	T	G	T	G	A	T	T	A	A	A	A	T	A	A	G	A	T
G	G	C	T	T	A	G	G	A	T	G	A	G	T	A	T	T	A	T	T	T	T	A	G	G	G	T	T	T	T	T	C	G	C	T	A	G	T	A	G	T	T	T	T	G	T	A	T	T	A
T	T	G	T	G	C	T	A	A	A	T	C	T	T	G	G	A	G	A	A	A	A	G	T	T	A	A	A	A	A	A	G	A	A	T	G	T	A	G	T	A	A	A	A	T	A	C	T	A	G
T	T	A	C	T	C	G	A	A	G	T	T	G	T	C	G	G	C	G	G	G	G	C	T	T	A	G	G	G	G	G	A	A	C	A	C	G	G	C	T	G	G	G	G	T	G	T	A	G	C
A	A	G	A	T	C	T	A	C	C	A	G	T	T	A	T	C	A	C	C	C	C	A	A	A	A	C	C	C	C	C	G	A	A	C	A	T	C	A	A	C	C	C	C	A	C	G	C	C	A
C	C	C	A	A	T	T	T	A	A	C	G	T	C	G	G	A	G	A	A	A	A	G	C	C	T	A	A	A	A	A	C	T	A	C	G	T	A	G	C	A	A	A	A	C	A	G	C	A	G
C	C	T	G	C	C	A	T	T	G	C	A	A	A	T	T	G	T	G	G	G	G	T	C	C	T	G	G	G	G	G	T	T	T	C	T	A	G	T	C	G	G	G	G	C	G	A	C	G	T
C	C	T	A	C	T	C	T	A	T	C	A	C	A	G	T	T	G	T	T	T	T	G	C	C	T	T	T	T	T	T	T	T	T	G	G	C	T	G	C	T	T	T	T	C	T	A	G	T	G
G	G	G	A	C	T	C	G	G	G	G	C	C	G	G	A	G	G	G	G	G	G	G	G	G	G	G	G	G	G	G	G	G	C	T	G	C	G	G	G	G	G	G	G	G	G	C	T	G	G
T	T	G	A	G	G	C	A	C	G	T	A	C	A	T	C	G	T	G	G	G	G	T	T	T	A	G	G	G	G	G	G	A	A	G	T	C	G	T	T	G	G	G	G	T	G	A	G	G	T
G	G	C	A	T	A	G	C	A	T	G	C	G	A	G	C	T	G	T	T	T	T	G	G	G	C	T	T	T	T	T	C	C	G	A	G	G	T	G	G	T	T	T	T	G	T	C	A	T	G
A	A	A	C	G	G	T	A	G	G	A	T	T	A	T	C	G	T	G	G	G	G	T	A	A	A	G	G	G	G	G	A	A	A	A	T	T	G	T	A	G	G	G	G	A	G	T	A	G	T
A	A	C	T	A	T	G	C	T	T	A	A	G	A	T	G	T	T	T	T	T	T	T	A	A	C	T	T	T	T	T	C	C	A	C	T	G	T	T	A	T	T	T	T	A	T	A	C	T	T
C	C	T	G	A	G	A	C	G	T	C	A	A	C	A	T	T	A	T	T	T	T	A	C	C	C	T	T	T	T	T	T	C	G	T	A	A	T	A	C	T	T	T	T	C	T	A	T	T	A
T	T	G	G	C	C	A	T	G	A	T	A	A	T	C	G	A	C	A	A	A	A	C	T	T	T	A	A	A	A	A	G	T	T	C	C	A	A	C	T	A	A	A	A	T	A	A	C	A	C
C	C	A	A	T	A	C	T	T	C	C	C	C	G	C	A	C	C	C	C	C	C	C	C	C	T	C	C	C	C	C	A	T	A	A	C	C	C	C	C	C	C	C	C	C	C	C	A	C	C
A	A	T	A	C	T	T	C	G	C	A	A	T	G	C	A	C	C	C	C	C	C	C	A	A	C	C	C	C	C	C	T	C	G	T	C	T	C	C	A	C	C	C	C	A	C	A	T	C	C
T	T	C	C	A	T	C	A	T	C	T	T	C	A	G	C	C	G	C	C	C	C	G	T	T	A	C	C	C	C	C	C	A	G	G	G	C	C	G	T	C	C	C	C	T	C	T	G	C	G
G	G	C	A	T	A	A	A	T	G	G	A	A	A	T	T	G	T	G	G	G	G	T	G	G	A	G	G	G	G	G	C	A	A	C	T	A	G	T	G	G	G	G	G	G	G	A	C	G	T
C	C	T	C	G	A	T	T	A	T	C	G	T	C	G	C	T	G	T	T	T	T	G	C	C	T	T	T	T	T	T	T	T	C	G	G	T	T	G	C	T	T	T	T	C	T	G	G	T	G
G	G	T	T	C	A	G	G	C	G	G	C	G	A	A	A	G	A	G	G	G	G	A	G	G	G	G	G	G	G	G	T	G	C	T	A	G	G	A	G	G	G	G	G	G	G	C	T	G	A
T	T	A	A	G	G	C	G	C	A	T	A	C	C	A	T	A	A	A	A	A	A	A	T	T	G	A	A	A	A	A	A	G	T	G	A	C	A	A	T	A	A	A	A	T	A	A	G	A	A
G	G	T	A	T	A	G	G	C	A	G	G	G	T	C	G	A	C	A	A	A	A	C	G	G	G	A	A	A	A	A	T	G	G	A	C	G	A	C	G	A	A	A	A	G	A	G	A	A	C
A	A	G	A	G	C	T	G	G	C	A	T	T	A	T	C	C	T	C	C	C	C	T	A	A	G	C	C	C	C	C	G	G	A	G	T	T	C	T	A	C	C	C	C	A	C	T	G	C	T
G	G	A	C	A	C	G	A	T	T	G	G	G	A	C	G	T	C	T	T	T	T	C	G	G	A	T	T	T	T	T	A	A	G	C	C	G	T	C	G	T	T	T	T	G	T	G	C	T	C
C	C	A	A	G	T	A	A	G	C	C	G	A	A	A	T	C	A	C	C	C	C	A	C	C	A	C	C	C	C	C	A	A	C	T	A	A	C	A	C	C	C	C	C	C	C	G	T	C	A
T	T	G	T	C	T	G	T	A	A	T	T	G	C	T	G	A	T	A	A	A	A	T	T	T	T	A	A	A	A	A	G	T	A	T	T	G	A	T	T	A	A	A	A	T	A	T	T	A	T
T	T	A	A	T	C	C	G	A	T	T	G	C	A	G	A	T	G	T	T	T	T	G	T	T	G	T	T	T	T	T	A	G	T	A	G	C	T	G	T	T	T	T	T	T	T	G	A	T	G
A	A	T	G	T	T	T	T	C	G	A	T	T	T	C	G	G	C	G	G	G	G	C	A	A	T	G	G	G	G	G	T	T	A	A	C	T	G	C	A	G	G	G	G	A	G	T	A	G	C
A	A	T	C	A	A	T	C	T	C	A	T	T	A	G	C	C	G	C	C	C	C	G	A	A	C	C	C	C	C	C	T	C	G	C	G	T	C	G	A	C	C	C	C	A	C	T	C	C	G
C	C	T	A	A	G	A	C	C	G	C	A	A	G	T	T	G	T	G	G	G	G	T	C	C	C	G	G	G	G	G	T	C	T	G	T	A	G	T	C	G	G	G	G	C	G	A	G	G	T
G	G	T	G	C	C	A	A	A	T	G	C	A	C	G	T	T	G	T	T	T	T	G	G	G	A	T	T	T	T	T	T	A	C	G	G	A	T	G	G	T	T	T	T	G	T	C	G	T	G
G	G	C	T	G	A	C	A	T	G	G	C	C	A	A	A	G	A	G	G	G	G	A	G	G	A	G	G	G	G	G	C	A	T	A	A	C	G	A	G	G	G	G	G	G	G	C	A	G	A
A	A	A	G	G	C	G	A	G	A	A	C	G	G	G	A	A	G	A	A	A	A	G	A	A	A	A	A	A	A	A	A	A	T	G	G	G	A	G	A	A	A	A	A	A	A	C	G	A	G
G	G	A	G	A	G	G	T	C	G	G	G	G	T	C	C	G	C	G	G	G	G	C	G	G	T	G	G	G	G	G	A	T	G	G	C	G	G	C	G	G	G	G	G	G	G	G	G	G	C
G	G	G	T	G	T	A	T	G	C	G	T	A	G	T	G	C	T	C	C	C	C	T	G	G	T	C	C	C	C	C	G	T	C	G	T	A	C	T	G	C	C	C	C	G	C	T	G	C	T
G	G	A	G	G	G	G	T	T	T	G	G	G	G	T	G	T	T	T	T	T	T	T	G	G	T	T	T	T	T	T	A	T	C	G	T	G	T	T	G	T	T	T	T	G	T	G	G	T	T
G	G	A	T	G	C	G	T	G	T	G	A	G	T	A	A	T	A	T	T	T	T	A	G	G	T	T	T	T	T	T	A	T	G	C	A	G	T	A	G	T	T	T	T	G	T	A	C	T	A
C	C	A	T	G	T	G	G	A	A	C	A	G	G	A	G	A	A	A	A	A	A	A	C	C	G	A	A	A	A	A	A	G	A	A	A	G	A	A	C	A	A	A	A	C	A	A	A	A	A
A	A	A	A	C	G	G	T	G	A	A	C	G	T	C	G	A	C	A	A	A	A	C	A	A	T	A	A	A	A	A	A	T	A	T	C	G	A	C	A	A	A	A	A	A	A	C	T	A	C
T	T	C	C	A	G	C	A	C	C	T	T	C	T	G	G	C	G	C	C	C	C	G	T	T	A	C	C	C	C	C	C	A	T	A	G	C	C	G	T	C	C	C	C	T	C	T	A	C	G
A	A	T	C	T	T	A	T	T	G	A	C	A	A	G	G	G	G	G	G	G	G	G	A	A	T	G	G	G	G	G	T	T	A	C	G	A	G	G	A	G	G	G	G	A	G	C	C	G	G
C	C	G	C	A	A	T	T	T	G	C	A	T	C	A	C	G	A	G	G	G	G	A	C	C	T	G	G	G	G	G	G	T	C	A	A	T	G	A	C	G	G	G	G	C	G	A	A	G	A
A	A	G	G	C	A	A	T	A	A	A	T	A	C	G	A	A	G	A	A	A	A	G	A	A	T	A	A	A	A	A	G	T	C	C	G	A	A	G	A	A	A	A	A	A	A	T	C	A	G
C	C	A	T	A	A	C	C	A	G	C	G	C	C	G	T	G	G	G	G	G	G	G	C	C	C	G	G	G	G	G	A	C	A	T	G	C	G	G	C	G	G	G	G	C	G	G	T	G	G
T	T	A	G	C	G	A	C	C	G	T	C	A	G	G	A	G	G	G	G	G	G	G	T	T	C	G	G	G	G	G	A	C	T	C	G	A	G	G	T	G	G	G	G	T	G	C	C	G	G
C	C	C	A	T	C	C	C	G	G	C	G	C	T	G	C	G	G	G	G	G	G	G	C	C	C	G	G	G	G	G	C	C	A	G	G	C	G	G	C	G	G	G	G	C	G	G	G	G	G
G	G	A	A	C	T	T	T	G	G	G	T	T	G	C	A	G	C	G	G	G	G	C	G	G	T	G	G	G	G	G	A	T	A	C	C	T	G	C	G	G	G	G	G	G	G	T	C	G	C
C	C	C	C	G	T	C	T	A	C	C	G	C	A	A	C	C	A	C	C	C	C	A	C	C	T	C	C	C	C	C	C	T	T	T	A	C	C	A	C	C	C	C	C	C	C	G	T	C	A
T	T	T	T	C	C	G	A	G	A	T	A	G	A	T	T	A	T	A	A	A	A	T	T	T	A	A	A	A	A	A	T	A	G	A	T	G	A	T	T	A	A	A	A	T	A	A	A	A	T
A	A	A	C	T	A	C	A	G	T	A	G	C	C	A	C	T	A	T	T	T	T	A	A	A	A	T	T	T	T	T	A	A	A	T	A	C	T	A	A	T	T	T	T	A	T	G	T	T	A
T	T	A	A	A	T	T	A	G	A	T	C	T	T	C	G	A	C	A	A	A	A	C	T	T	A	A	A	A	A	A	A	A	A	G	C	T	A	C	T	A	A	A	A	T	A	C	G	A	C
G	G	A	T	T	G	A	T	G	C	G	T	A	C	A	C	C	A	C	C	C	C	A	G	G	T	C	C	C	C	C	A	T	T	T	A	A	C	A	G	C	C	C	C	G	C	T	T	C	A
T	T	C	G	G	C	T	T	C	A	T	T	T	A	C	T	A	C	A	A	A	A	C	T	T	T	A	A	A	A	A	C	T	C	C	C	T	A	C	T	A	A	A	A	T	A	T	C	A	C
C	C	A	C	T	A	G	C	A	C	C	A	G	T	T	A	C	T	C	C	C	C	T	C	C	C	C	C	C	C	C	A	C	T	G	T	G	C	T	C	C	C	C	C	C	C	A	G	C	T
G	G	T	G	C	C	T	C	T	T	G	A	T	G	C	T	T	C	T	T	T	T	C	G	G	C	T	T	T	T	T	T	C	G	A	C	T	T	C	G	T	T	T	T	G	T	A	A	T	C
A	A	A	T	G	N	C	A	A	C	A	C	C	C	G	G	C	G	C	C	C	C	G	A	A	A	C	C	C	C	C	A	A	G	T	G	C	C	G	A	C	C	C	C	A	C	C	T	C	G
T	T	G	G	A	N	G	T	C	G	T	G	G	G	C	T	G	C	G	G	G	G	C	T	T	T	G	G	G	G	G	G	T	C	A	C	G	G	C	T	G	G	G	G	T	G	G	A	G	C
A	A	C	A	T	N	A	A	A	C	A	G	A	T	T	C	C	T	C	C	C	C	T	A	A	A	C	C	C	C	C	C	A	T	A	T	A	C	T	A	C	C	C	C	A	C	G	A	C	T
A	A	A	G	A	N	T	A	C	T	A	A	T	G	A	G	T	A	T	T	T	T	A	A	A	A	T	T	T	T	T	A	A	T	C	A	T	T	A	A	T	T	T	T	A	T	A	C	T	A
C	C	G	C	A	N	A	T	T	A	C	G	A	A	T	A	A	T	A	A	A	A	T	C	C	T	A	A	A	A	A	G	T	G	A	T	A	A	T	C	A	A	A	A	C	A	G	A	A	T
A	A	T	T	C	N	A	C	C	T	A	G	A	G	G	T	T	G	T	T	T	T	G	A	A	C	T	T	T	T	T	T	C	A	A	G	A	T	G	A	T	T	T	T	A	T	G	A	T	G
A	A	G	T	A	N	C	A	G	G	A	G	C	C	T	A	G	T	G	G	G	G	T	A	A	A	G	G	G	G	G	G	A	A	C	T	C	G	T	A	G	G	G	G	A	G	G	C	G	T
C	C	G	A	A	N	A	A	C	T	C	G	A	T	C	A	T	C	T	T	T	T	C	C	C	A	T	T	T	T	T	G	A	A	T	C	A	T	C	C	T	T	T	T	C	T	G	T	T	C
T	T	T	A	C	N	A	G	T	C	T	C	A	T	G	C	C	G	C	C	C	C	G	T	T	G	C	C	C	C	C	T	G	A	T	G	A	C	G	T	C	C	C	C	T	C	C	T	C	G
T	T	G	C	T	N	C	A	A	G	T	A	C	A	A	A	G	A	G	G	G	G	A	T	T	A	G	G	G	G	G	G	A	C	C	A	C	G	A	T	G	G	G	G	T	G	A	C	G	A
C	C	T	G	T	N	T	C	T	A	C	T	T	A	T	A	A	T	A	A	A	A	T	C	C	C	A	A	A	A	A	T	C	C	T	T	T	A	T	C	A	A	A	A	C	A	T	T	A	T
T	T	T	G	C	N	T	T	G	T	T	A	T	C	A	C	T	A	T	T	T	T	A	T	T	T	T	T	T	T	T	T	T	A	G	A	T	T	A	T	T	T	T	T	T	T	A	G	T	A
G	G	A	A	T	N	C	A	T	A	G	C	C	G	A	T	A	A	A	A	A	A	A	G	G	A	A	A	A	A	A	A	A	T	T	A	C	A	A	G	A	A	A	A	G	A	C	T	A	A
T	T	C	G	G	N	T	T	C	A	T	A	T	G	C	T	A	C	A	A	A	A	C	T	T	T	A	A	A	A	A	C	T	T	G	C	T	A	C	T	A	A	A	A	T	A	A	G	A	C
G	G	C	G	T	N	G	T	G	C	G	C	G	A	A	C	C	A	C	C	C	C	A	G	G	T	C	C	C	C	C	C	T	C	G	A	G	C	A	G	C	C	C	C	G	C	C	G	C	A
G	G	C	G	G	N	T	C	A	A	G	T	T	G	A	T	A	A	A	A	A	A	A	G	G	C	A	A	A	A	A	C	C	T	C	A	T	A	A	G	A	A	A	A	G	A	T	C	A	A
C	C	G	G	G	N	G	A	T	A	C	C	G	G	C	G	A	C	A	A	A	A	C	C	C	A	A	A	A	A	A	G	A	T	C	C	G	A	C	C	A	A	A	A	C	A	C	C	A	C
C	C	T	C	C	N	G	A	A	C	C	G	G	G	T	T	C	T	C	C	C	C	T	C	C	A	C	C	C	C	C	T	A	C	C	T	G	C	T	C	C	C	C	C	C	C	G	C	C	T
C	C	G	A	C	N	C	C	A	T	C	C	C	G	T	G	T	T	T	T	T	T	T	C	C	C	T	T	T	T	T	G	C	G	T	T	C	T	T	C	T	T	T	T	C	T	C	T	T	T
T	T	A	T	C	N	C	C	C	T	T	T	C	C	C	G	T	C	T	T	T	T	C	T	T	C	T	T	T	T	T	A	C	T	G	C	C	T	C	T	T	T	T	T	T	T	T	G	T	C
G	G	A	A	T	N	C	A	A	C	G	A	C	A	T	C	C	T	C	C	C	C	T	G	G	A	C	C	C	C	C	A	A	A	A	T	C	C	T	G	C	C	C	C	G	C	A	A	C	T
A	A	C	C	G	N	T	A	A	T	A	T	T	T	G	C	T	G	T	T	T	T	G	A	A	A	T	T	T	T	T	C	A	A	T	G	T	T	G	A	T	T	T	T	A	T	T	T	T	G
T	T	T	A	A	N	G	G	C	G	T	G	G	A	T	C	G	T	G	G	G	G	T	T	T	G	G	G	G	G	G	T	G	G	G	T	G	G	T	T	G	G	G	G	T	G	G	G	G	T
G	G	C	C	T	N	A	G	T	T	G	T	A	C	G	T	T	G	T	T	T	T	G	G	G	G	T	T	T	T	T	C	G	G	G	G	A	T	G	G	T	T	T	T	G	T	T	G	T	G
G	G	A	T	G	N	T	G	T	G	G	C	T	A	G	G	G	G	G	G	G	G	G	G	G	G	G	G	G	G	G	A	G	G	C	G	T	G	G	G	G	G	G	G	G	G	C	C	G	G
C	C	T	C	G	N	G	T	C	G	C	G	G	C	C	A	G	C	G	G	G	G	C	C	C	T	G	G	G	G	G	T	T	T	T	C	G	G	C	C	G	G	G	G	C	G	G	T	G	C
T	T	G	G	C	N	G	T	T	C	T	A	G	T	C	T	C	C	C	C	C	C	C	T	T	T	C	C	C	C	C	G	T	G	A	C	G	C	C	T	C	C	C	C	T	C	A	A	C	C
A	A	C	C	T	N	C	G	G	C	A	T	C	C	C	G	C	C	C	C	C	C	C	A	A	G	C	C	C	C	C	C	G	G	C	C	C	C	C	A	C	C	C	C	A	C	T	C	C	C
C	C	G	T	A	N	T	A	T	C	C	A	T	G	T	G	C	T	C	C	C	C	T	C	C	A	C	C	C	C	C	G	A	T	C	T	T	C	T	C	C	C	C	C	C	C	A	C	C	T
C	C	T	A	C	N	A	A	G	T	C	A	A	C	G	C	T	G	T	T	T	T	G	C	C	A	T	T	T	T	T	T	A	C	C	G	A	T	G	C	T	T	T	T	C	T	A	C	T	G
C	C	G	T	C	N	C	A	G	G	C	C	C	T	A	T	G	A	G	G	G	G	A	C	C	A	G	G	G	G	G	G	A	G	T	A	C	G	A	C	G	G	G	G	C	G	C	T	G	A
T	T	A	G	C	N	C	A	C	A	T	A	C	A	T	A	A	T	A	A	A	A	T	T	T	A	A	A	A	A	A	A	A	C	C	T	C	A	T	T	A	A	A	A	T	A	A	C	A	T
C	C	G	T	T	N	C	G	C	T	C	A	C	T	G	C	T	G	T	T	T	T	G	C	C	G	T	T	T	T	T	G	G	A	T	G	C	T	G	C	T	T	T	T	C	T	A	T	T	G
T	T	C	C	C	N	T	A	C	G	T	C	T	G	G	C	G	G	G	G	G	G	G	T	T	A	G	G	G	G	G	C	A	C	T	G	T	G	G	T	G	G	G	G	T	G	C	T	G	G
T	T	T	G	T	N	C	A	T	G	T	T	C	T	C	C	G	C	G	G	G	G	C	T	T	A	G	G	G	G	G	T	A	T	G	C	C	G	C	T	G	G	G	G	T	G	T	G	G	C
G	G	T	A	T	N	T	A	G	C	G	T	T	C	T	T	C	T	C	C	C	C	T	G	G	A	C	C	C	C	C	T	A	A	A	T	T	C	T	G	C	C	C	C	G	C	T	A	C	T
A	A	A	T	G	N	T	A	A	T	A	C	T	G	A	C	T	A	T	T	T	T	A	A	A	A	T	T	T	T	T	A	A	T	G	A	T	T	A	A	T	T	T	T	A	T	C	G	T	A
G	G	A	A	A	N	G	A	T	A	G	T	G	A	C	T	A	C	A	A	A	A	C	G	G	A	A	A	A	A	A	A	A	T	T	C	G	A	C	G	A	A	A	A	G	A	T	T	A	C
T	T	C	A	G	N	A	G	G	C	T	G	A	T	C	T	C	C	C	C	C	C	C	T	T	G	C	C	C	C	C	C	G	G	G	C	A	C	C	T	C	C	C	C	T	C	G	G	C	C
G	G	G	C	T	N	G	C	G	C	G	T	G	A	C	G	C	C	C	C	C	C	C	G	G	C	C	C	C	C	C	G	C	C	C	C	G	C	C	G	C	C	C	C	G	C	T	C	C	C
C	C	G	A	G	N	T	T	C	C	C	G	T	A	T	A	C	T	C	C	C	C	T	C	C	T	C	C	C	C	C	G	T	C	A	T	T	C	T	C	C	C	C	C	C	C	G	A	C	T
A	A	A	A	C	N	G	T	T	T	A	G	G	C	C	G	T	C	T	T	T	T	C	A	A	T	T	T	T	T	T	A	T	T	T	C	G	T	C	A	T	T	T	T	A	T	G	T	T	C
T	T	G	C	A	N	C	G	A	C	T	C	C	A	T	T	C	T	C	C	C	C	T	T	T	G	C	C	C	C	C	G	G	T	T	T	C	C	T	T	C	C	C	C	T	C	C	T	C	T
T	T	G	T	T	N	A	A	C	T	T	C	A	A	T	G	T	T	T	T	T	T	T	T	T	A	T	T	T	T	T	G	A	T	A	T	A	T	T	T	T	T	T	T	T	T	C	A	T	T
A	A	G	T	T	N	T	T	C	T	A	C	T	C	G	C	T	G	T	T	T	T	G	A	A	T	T	T	T	T	T	G	T	G	A	G	T	T	G	A	T	T	T	T	A	T	C	A	T	G
A	A	G	C	A	N	T	G	C	G	A	T	T	T	A	A	G	A	G	G	G	G	A	A	A	G	G	G	G	G	G	G	G	G	A	A	T	G	A	A	G	G	G	G	A	G	T	A	G	A
A	A	C	T	A	N	A	G	T	A	A	G	A	T	G	T	A	G	A	A	A	A	G	A	A	G	A	A	A	A	A	C	G	A	G	G	A	A	G	A	A	A	A	A	A	A	G	G	A	G
G	G	A	G	A	N	A	C	C	G	G	A	A	C	T	T	G	T	G	G	G	G	T	G	G	C	G	G	G	G	G	A	C	G	A	T	A	G	T	G	G	G	G	G	G	G	A	A	G	T
A	A	T	T	G	N	A	T	T	T	A	T	A	T	G	A	T	G	T	T	T	T	G	A	A	T	T	T	T	T	T	T	T	G	C	G	A	T	G	A	T	T	T	T	A	T	T	C	T	G
C	C	A	G	A	N	G	T	T	G	C	G	G	G	C	A	G	C	G	G	G	G	C	C	C	T	G	G	G	G	G	A	T	C	C	C	G	G	C	C	G	G	G	G	C	G	G	C	G	C
C	C	C	G	C	N	A	T	G	C	C	G	A	T	A	A	C	A	C	C	C	C	A	C	C	T	C	C	C	C	C	C	T	T	T	A	A	C	A	C	C	C	C	C	C	C	G	T	C	A
T	T	A	C	C	N	C	A	A	A	T	C	C	G	T	G	A	T	A	A	A	A	T	T	T	A	A	A	A	A	A	A	A	G	T	T	C	A	T	T	A	A	A	A	T	A	C	T	A	T
T	T	C	C	T	N	C	T	G	T	T	T	C	G	T	A	T	T	T	T	T	T	T	T	T	T	T	T	T	T	T	C	T	T	C	T	C	T	T	T	T	T	T	T	T	T	T	C	T	T
C	C	T	C	T	N	T	G	T	T	C	A	T	C	A	C	T	A	T	T	T	T	A	C	C	G	T	T	T	T	T	T	G	G	T	A	T	T	A	C	T	T	T	T	C	T	A	T	T	A
T	T	C	T	C	N	T	G	G	A	T	C	T	C	A	C	A	A	A	A	A	A	A	T	T	G	A	A	A	A	A	C	G	T	A	A	T	A	A	T	A	A	A	A	T	A	C	A	A	A
A	A	G	G	T	N	C	G	C	A	A	C	C	C	A	T	A	A	A	A	A	A	A	A	A	G	A	A	A	A	A	G	G	G	G	A	C	A	A	A	A	A	A	A	A	A	C	G	A	A
G	G	C	A	A	N	T	T	A	A	G	C	T	T	G	T	A	G	A	A	A	A	G	G	G	T	A	A	A	A	A	C	T	T	C	G	T	A	G	G	A	A	A	A	G	A	C	C	A	G
C	C	T	T	G	N	A	A	T	G	C	T	A	G	A	C	G	A	G	G	G	G	A	C	C	A	G	G	G	G	G	T	A	T	A	A	A	G	A	C	G	G	G	G	C	G	T	A	G	A
A	A	A	G	C	N	G	G	T	A	A	C	G	A	C	T	A	C	A	A	A	A	C	A	A	G	A	A	A	A	A	A	G	C	C	C	G	A	C	A	A	A	A	A	A	A	C	C	A	C
C	C	T	G	A	N	C	A	A	C	C	T	C	T	C	A	C	C	C	C	C	C	C	C	C	A	C	C	C	C	C	T	A	T	G	C	C	C	C	C	C	C	C	C	C	C	T	G	C	C
G	G	G	C	C	N	A	A	A	C	G	T	A	G	T	G	C	T	C	C	C	C	T	G	G	A	C	C	C	C	C	G	A	C	T	T	A	C	T	G	C	C	C	C	G	C	T	T	C	T
T	T	T	T	G	N	C	T	A	T	T	G	C	G	T	C	T	T	T	T	T	T	T	T	T	T	T	T	T	T	T	T	T	T	G	T	C	T	T	T	T	T	T	T	T	T	G	G	T	T
G	G	C	A	T	N	G	T	G	T	G	A	G	C	C	A	T	C	T	T	T	T	C	G	G	T	T	T	T	T	T	C	T	T	C	C	G	T	C	G	T	T	T	T	G	T	A	C	T	C
C	C	G	C	G	N	T	C	A	C	C	G	T	T	T	C	C	T	C	C	C	C	T	C	C	C	C	C	C	C	C	G	C	A	T	T	T	C	T	C	C	C	C	C	C	C	G	T	C	T
T	T	A	C	C	N	G	G	C	T	T	T	G	A	A	G	T	A	T	T	T	T	A	T	T	G	T	T	T	T	T	A	G	T	G	A	G	T	A	T	T	T	T	T	T	T	T	G	T	A
G	G	T	C	T	N	C	A	C	A	G	G	C	C	G	T	A	G	A	A	A	A	G	G	G	A	A	A	A	A	A	T	A	G	G	G	C	A	G	G	A	A	A	A	G	A	G	G	A	G
G	G	A	T	G	N	T	T	T	G	G	C	T	C	C	G	G	C	G	G	G	G	C	G	G	T	G	G	G	G	G	A	T	T	T	C	T	G	C	G	G	G	G	G	G	G	C	T	G	C
T	T	A	C	G	N	G	C	T	C	T	A	G	C	A	C	C	A	C	C	C	C	A	T	T	C	C	C	C	C	C	A	C	T	A	A	G	C	A	T	C	C	C	C	T	C	A	A	C	A
A	A	C	T	T	N	G	T	C	A	A	T	G	T	C	T	A	C	A	A	A	A	C	A	A	T	A	A	A	A	A	C	T	G	A	C	G	A	C	A	A	A	A	A	A	A	T	A	A	C
A	A	A	T	A	N	T	G	T	C	A	T	T	C	G	G	C	G	C	C	C	C	G	A	A	G	C	C	C	C	C	A	G	G	A	G	T	C	G	A	C	C	C	C	A	C	T	A	C	G
A	A	A	G	A	N	A	T	A	G	A	A	A	T	T	G	G	T	G	G	G	G	T	A	A	T	G	G	G	G	G	A	T	T	G	T	A	G	T	A	G	G	G	G	A	G	A	G	G	T
G	G	C	A	A	N	A	C	G	T	G	A	A	T	G	T	T	G	T	T	T	T	G	G	G	C	T	T	T	T	T	C	C	T	C	G	A	T	G	G	T	T	T	T	G	T	A	C	T	G
C	C	T	G	G	N	A	T	C	G	C	A	A	G	C	A	G	C	G	G	G	G	C	C	C	T	G	G	G	G	G	T	T	G	T	C	A	G	C	C	G	G	G	G	C	G	A	T	G	C
T	T	T	T	C	N	G	A	A	C	T	G	G	A	T	A	C	T	C	C	C	C	T	T	T	A	C	C	C	C	C	T	A	C	T	T	G	C	T	T	C	C	C	C	T	C	G	T	C	T
T	T	C	G	T	N	C	T	C	T	T	A	C	G	G	A	T	G	T	T	T	T	G	T	T	T	T	T	T	T	T	C	T	C	C	G	C	T	G	T	T	T	T	T	T	T	A	C	T	G
C	C	T	C	T	N	T	C	G	G	C	C	T	T	G	G	G	G	G	G	G	G	G	C	C	C	G	G	G	G	G	T	C	A	A	G	T	G	G	C	G	G	G	G	C	G	C	A	G	G
A	A	G	A	C	N	T	C	T	G	A	C	T	G	T	C	G	T	G	G	G	G	T	A	A	C	G	G	G	G	G	G	C	T	T	T	T	G	T	A	G	G	G	G	A	G	C	T	G	T
T	T	T	T	A	N	C	A	G	T	T	T	C	C	A	T	T	A	T	T	T	T	A	T	T	A	T	T	T	T	T	T	A	A	G	A	C	T	A	T	T	T	T	T	T	T	T	G	T	A
G	G	G	T	T	N	A	G	C	A	G	T	A	A	A	T	A	A	A	A	A	A	A	G	G	G	A	A	A	A	A	G	G	A	C	A	A	A	A	G	A	A	A	A	G	A	T	C	A	A
C	C	G	A	G	N	T	T	T	A	C	C	T	T	A	C	A	A	A	A	A	A	A	C	C	T	A	A	A	A	A	G	T	C	A	A	T	A	A	C	A	A	A	A	C	A	C	A	A	A
A	A	C	A	C	N	G	T	G	A	A	T	G	T	G	A	A	G	A	A	A	A	G	A	A	T	A	A	A	A	A	C	T	A	C	G	G	A	G	A	A	A	A	A	A	A	T	C	A	G
C	C	C	A	A	N	C	G	G	G	C	A	C	A	C	T	G	C	G	G	G	G	C	C	C	G	G	G	G	G	G	C	G	A	T	C	C	G	C	C	G	G	G	G	C	G	A	T	G	C
T	T	C	G	C	N	A	C	T	C	T	G	A	A	T	G	C	T	C	C	C	C	T	T	T	C	C	C	C	C	C	C	C	G	T	T	A	C	T	T	C	C	C	C	T	C	G	T	C	T
T	T	T	A	T	N	C	G	A	T	T	C	C	A	T	C	T	T	T	T	T	T	T	T	T	G	T	T	T	T	T	T	G	T	T	T	C	T	T	T	T	T	T	T	T	T	C	T	T	T
T	T	G	C	T	N	T	T	A	T	T	A	T	G	C	A	T	C	T	T	T	T	C	T	T	T	T	T	T	T	T	G	T	G	G	C	T	T	C	T	T	T	T	T	T	T	A	G	T	C
G	G	A	C	T	N	T	C	A	C	G	C	T	A	A	C	C	A	C	C	C	C	A	G	G	C	C	C	C	C	C	A	C	T	T	A	T	C	A	G	C	C	C	C	G	C	C	T	C	A
T	T	T	T	G	N	T	A	G	A	T	G	T	C	T	T	A	T	A	A	A	A	T	T	T	A	A	A	A	A	A	T	A	G	C	T	T	A	T	T	A	A	A	A	T	A	G	C	A	T
C	C	G	T	T	N	G	C	C	T	C	T	G	C	G	T	T	G	T	T	T	T	G	C	C	C	T	T	T	T	T	G	C	C	C	G	G	T	G	C	T	T	T	T	C	T	T	C	T	G
C	C	G	C	C	N	T	C	T	G	C	G	T	T	C	T	G	C	G	G	G	G	C	C	C	C	G	G	G	G	G	G	C	C	G	C	T	G	C	C	G	G	G	G	C	G	G	G	G	C
G	G	C	T	C	N	C	A	T	C	G	C	C	T	A	G	C	A	C	C	C	C	A	G	G	A	C	C	C	C	C	C	A	T	A	A	C	C	A	G	C	C	C	C	G	C	C	A	C	A
A	A	T	A	G	N	C	A	C	A	A	T	C	C	C	T	A	C	A	A	A	A	C	A	A	A	A	A	A	A	A	T	A	A	A	C	C	A	C	A	A	A	A	A	A	A	T	A	A	C
A	A	A	G	A	N	G	A	A	C	A	G	G	T	T	C	C	T	C	C	C	C	T	A	A	A	C	C	C	C	C	A	A	T	C	T	G	C	T	A	C	C	C	C	A	C	G	C	C	T
C	C	C	C	A	N	A	T	T	T	C	G	A	A	T	C	T	T	T	T	T	T	T	C	C	T	T	T	T	T	T	C	T	T	A	T	A	T	T	C	T	T	T	T	C	T	G	A	T	T
A	A	C	A	C	N	A	G	G	T	A	T	A	G	T	G	T	T	T	T	T	T	T	A	A	G	T	T	T	T	T	C	G	G	A	T	A	T	T	A	T	T	T	T	A	T	T	A	T	T
A	A	C	C	A	N	C	A	C	T	A	A	C	C	G	A	T	G	T	T	T	T	G	A	A	A	T	T	T	T	T	C	A	G	C	G	C	T	G	A	T	T	T	T	A	T	A	C	T	G
C	C	T	G	A	N	A	A	A	G	C	A	A	A	T	A	G	T	G	G	G	G	T	C	C	A	G	G	G	G	G	T	A	G	T	T	A	G	T	C	G	G	G	G	C	G	A	T	G	T
T	T	C	T	C	N	A	T	C	T	T	A	A	C	C	C	T	C	T	T	T	T	C	T	T	T	T	T	T	T	T	C	T	T	G	C	A	T	C	T	T	T	T	T	T	T	A	G	T	C
G	G	T	G	T	N	C	G	T	C	G	G	C	G	C	A	C	C	C	C	C	C	C	G	G	G	C	C	C	C	C	T	G	T	G	C	C	C	C	G	C	C	C	C	G	C	G	G	C	C
G	G	T	C	G	N	T	C	T	C	G	C	T	T	G	A	C	G	C	C	C	C	G	G	G	C	C	C	C	C	C	T	C	C	A	G	T	C	G	G	C	C	C	C	G	C	C	A	C	G
A	A	G	T	G	N	G	A	T	G	A	T	G	G	A	C	G	A	G	G	G	G	A	A	A	A	G	G	G	G	G	G	A	C	C	A	G	G	A	A	G	G	G	G	A	G	T	C	G	A
C	C	A	G	A	N	G	A	G	A	C	T	G	C	A	T	A	A	A	A	A	A	A	C	C	A	A	A	A	A	A	A	A	A	T	A	G	A	A	C	A	A	A	A	C	A	T	T	A	A
T	T	G	G	C	N	A	C	T	A	T	C	A	T	C	G	A	C	A	A	A	A	C	T	T	C	A	A	A	A	A	G	C	C	T	C	A	A	C	T	A	A	A	A	T	A	C	T	A	C
T	T	T	T	T	N	C	C	C	C	T	A	C	G	A	G	C	A	C	C	C	C	A	T	T	C	C	C	C	C	C	T	C	G	T	A	C	C	A	T	C	C	C	C	T	C	A	T	C	A
T	T	G	A	T	N	T	A	C	A	T	T	T	G	A	A	A	A	A	A	A	A	A	T	T	A	A	A	A	A	A	G	A	T	A	A	T	A	A	T	A	A	A	A	T	A	T	A	A	A
A	A	C	A	T	N	T	A	G	A	A	G	T	T	C	C	A	C	A	A	A	A	C	A	A	A	A	A	A	A	A	C	A	G	T	C	T	A	C	A	A	A	A	A	A	A	G	T	A	C
T	T	A	A	A	N	T	A	A	C	T	C	T	A	T	T	C	T	C	C	C	C	T	T	T	A	C	C	C	C	C	A	A	C	T	T	T	C	T	T	C	C	C	C	T	C	C	T	C	T
T	T	T	G	T	N	A	T	A	T	T	A	A	A	G	T	T	G	T	T	T	T	G	T	T	T	T	T	T	T	T	T	T	T	G	G	A	T	G	T	T	T	T	T	T	T	A	G	T	G
G	G	T	C	T	N	T	G	C	G	G	C	T	A	G	T	G	G	G	G	G	G	G	G	G	G	G	G	G	G	G	T	G	A	A	G	T	G	G	G	G	G	G	G	G	G	C	A	G	G
A	A	A	T	G	N	T	T	A	G	A	T	T	G	A	A	G	A	G	G	G	G	A	A	A	T	G	G	G	G	G	A	T	G	C	A	T	G	A	A	G	G	G	G	A	G	T	C	G	A
C	C	A	T	A	N	G	G	A	A	C	T	G	C	C	T	A	C	A	A	A	A	C	C	C	G	A	A	A	A	A	A	G	C	A	C	G	A	C	C	A	A	A	A	C	A	T	A	A	C
A	A	A	C	C	N	A	C	C	C	A	T	A	T	T	T	C	T	C	C	C	C	T	A	A	C	C	C	C	C	C	A	C	G	C	T	A	C	T	A	C	C	C	C	A	C	T	C	C	T
C	C	G	A	A	N	C	C	T	T	C	G	C	T	T	G	T	T	T	T	T	T	T	C	C	C	T	T	T	T	T	G	C	C	T	T	C	T	T	C	T	T	T	T	C	T	G	T	T	T
T	T	A	T	C	N	A	T	G	T	T	T	A	C	T	A	T	T	T	T	T	T	T	T	T	T	T	T	T	T	T	A	T	T	A	T	A	T	T	T	T	T	T	T	T	T	T	A	T	T
A	A	C	G	T	N	C	T	G	T	A	C	C	A	A	C	T	A	T	T	T	T	A	A	A	T	T	T	T	T	T	C	T	A	A	A	C	T	A	A	T	T	T	T	A	T	C	A	T	A
A	A	C	C	A	N	T	T	A	A	A	C	T	T	T	A	A	T	A	A	A	A	T	A	A	T	A	A	A	A	A	C	T	A	G	T	T	A	T	A	A	A	A	A	A	A	C	G	A	T
G	G	T	A	A	N	A	C	C	T	G	G	A	G	T	C	T	T	T	T	T	T	T	G	G	C	T	T	T	T	T	T	C	C	A	T	A	T	T	G	T	T	T	T	G	T	G	A	T	T
A	A	T	C	G	N	A	A	T	T	A	A	A	C	G	T	T	G	T	T	T	T	G	A	A	A	T	T	T	T	T	T	A	A	G	G	A	T	G	A	T	T	T	T	A	T	A	G	T	G
G	G	C	T	A	N	G	A	T	G	G	A	G	A	A	A	G	A	G	G	G	G	A	G	G	A	G	G	G	G	G	C	A	T	G	A	G	G	A	G	G	G	G	G	G	G	A	G	G	A
G	G	T	T	G	N	A	C	T	A	G	C	A	C	C	A	A	C	A	A	A	A	C	G	G	C	A	A	A	A	A	T	C	A	G	C	A	A	C	G	A	A	A	A	G	A	C	G	A	C
G	G	A	T	G	N	G	T	A	C	G	A	G	T	A	G	C	A	C	C	C	C	A	G	G	T	C	C	C	C	C	A	T	G	G	A	G	C	A	G	C	C	C	C	G	C	A	G	C	A
G	G	G	G	G	N	G	C	T	A	G	A	G	T	C	A	A	C	A	A	A	A	C	G	G	C	A	A	A	A	A	G	C	G	T	C	G	A	C	G	A	A	A	A	G	A	A	T	A	C
T	T	C	T	G	N	G	T	T	C	T	C	G	T	T	G	C	T	C	C	C	C	T	T	T	T	C	C	C	C	C	C	T	T	G	T	G	C	T	T	C	C	C	C	T	C	C	G	C	T
G	G	A	C	T	N	G	C	G	T	G	T	G	G	A	G	T	A	T	T	T	T	A	G	G	C	T	T	T	T	T	A	C	T	T	A	G	T	A	G	T	T	T	T	G	T	T	T	T	A
T	T	C	C	G	N	T	A	A	A	T	G	T	T	A	G	A	A	A	A	A	A	A	T	T	A	A	A	A	A	A	C	A	G	A	A	T	A	A	T	A	A	A	A	T	A	G	A	A	A
A	A	G	G	T	N	G	T	C	A	A	G	G	C	G	G	A	G	A	A	A	A	G	A	A	T	A	A	A	A	A	G	T	T	T	G	G	A	G	A	A	A	A	A	A	A	G	T	A	G
T	T	T	A	A	N	T	G	A	G	T	A	T	C	A	T	G	A	G	G	G	G	A	T	T	G	G	G	G	G	G	T	G	A	A	A	T	G	A	T	G	G	G	G	T	G	A	A	G	A
A	A	G	A	T	N	A	A	C	A	A	C	A	G	G	G	A	G	A	A	A	A	G	A	A	A	A	A	A	A	A	G	A	A	C	G	A	A	G	A	A	A	A	A	A	A	C	C	A	G
C	C	C	C	A	N	T	A	T	G	C	T	T	A	G	T	G	G	G	G	G	G	G	C	C	A	G	G	G	G	G	C	A	C	T	G	T	G	G	C	G	G	G	G	C	G	T	T	G	G
T	T	T	A	C	N	A	G	A	G	T	T	A	A	G	A	G	G	G	G	G	G	G	T	T	G	G	G	G	G	G	T	G	C	G	G	A	G	G	T	G	G	G	G	T	G	T	G	G	G
G	G	G	A	T	N	C	T	A	G	G	T	C	C	G	T	G	G	G	G	G	G	G	G	G	T	G	G	G	G	G	G	T	A	C	G	C	G	G	G	G	G	G	G	G	G	T	C	G	G
C	C	G	C	G	N	T	G	G	G	C	A	T	A	T	A	G	T	G	G	G	G	T	C	C	G	G	G	G	G	G	G	G	T	T	T	T	G	T	C	G	G	G	G	C	G	A	T	G	T
T	T	T	T	C	N	G	T	A	T	T	T	G	A	G	C	T	G	T	T	T	T	G	T	T	T	T	T	T	T	T	T	T	A	G	G	G	T	G	T	T	T	T	T	T	T	T	G	T	G
G	G	A	G	T	N	C	G	G	G	G	T	C	C	T	T	G	T	G	G	G	G	T	G	G	G	G	G	G	G	G	A	G	C	C	T	C	G	T	G	G	G	G	G	G	G	T	C	G	T
C	C	A	G	G	N	T	A	G	T	C	G	T	T	A	G	T	A	T	T	T	T	A	C	C	A	T	T	T	T	T	A	A	A	C	A	T	T	A	C	T	T	T	T	C	T	G	C	T	A
C	C	A	A	C	N	G	T	G	A	C	A	G	G	T	C	A	T	A	A	A	A	T	C	C	T	A	A	A	A	A	A	T	G	G	T	G	A	T	C	A	A	A	A	C	A	A	G	A	T
G	G	G	C	C	N	C	C	G	T	G	C	C	G	A	T	T	A	T	T	T	T	A	G	G	C	T	T	T	T	T	G	C	G	T	A	C	T	A	G	T	T	T	T	G	T	C	T	T	A
T	T	C	T	G	N	C	A	T	A	T	A	C	A	C	G	A	C	A	A	A	A	C	T	T	A	A	A	A	A	A	C	A	T	G	C	C	A	C	T	A	A	A	A	T	A	A	G	A	C
G	G	T	T	T	N	G	T	G	C	G	C	G	C	T	C	C	T	C	C	C	C	T	G	G	T	C	C	C	C	C	T	T	G	A	T	G	C	T	G	C	C	C	C	G	C	C	A	C	T
A	A	T	T	G	N	T	T	T	T	A	T	T	T	G	C	T	G	T	T	T	T	G	A	A	T	T	T	T	T	T	T	T	T	A	G	T	T	G	A	T	T	T	T	A	T	T	A	T	G
A	A	C	A	A	N	G	G	A	G	A	A	G	T	C	G	G	C	G	G	G	G	C	A	A	G	G	G	G	G	G	C	G	T	C	C	G	G	C	A	G	G	G	G	A	G	A	C	G	C
C	C	A	T	A	N	A	T	T	C	C	A	A	T	T	T	C	T	C	C	C	C	T	C	C	T	C	C	C	C	C	A	T	G	A	T	A	C	T	C	C	C	C	C	C	C	A	A	C	T
A	A	T	T	C	N	A	G	A	T	A	G	A	A	G	G	T	G	T	T	T	T	G	A	A	G	T	T	T	T	T	T	G	T	T	G	A	T	G	A	T	T	T	T	A	T	G	T	T	G
T	T	G	G	A	N	C	G	C	G	T	A	C	T	C	A	G	C	G	G	G	G	C	T	T	G	G	G	G	G	G	G	G	T	G	C	C	G	C	T	G	G	G	G	T	G	A	G	G	C
G	G	C	A	T	N	A	T	T	C	G	G	A	T	C	A	C	C	C	C	C	C	C	G	G	T	C	C	C	C	C	C	T	G	A	C	A	C	C	G	C	C	C	C	G	C	G	A	C	C
A	A	A	C	G	N	T	G	G	C	A	G	T	G	G	C	C	G	C	C	C	C	G	A	A	G	C	C	C	C	C	A	G	G	G	G	T	C	G	A	C	C	C	C	A	C	G	G	C	G
G	G	C	A	A	N	G	A	C	G	G	G	G	A	T	A	G	T	G	G	G	G	T	G	G	A	G	G	G	G	G	C	A	A	C	T	G	G	T	G	G	G	G	G	G	G	G	C	G	T
C	C	T	C	G	N	A	A	T	T	C	G	A	C	G	T	T	G	T	T	T	T	G	C	C	A	T	T	T	T	T	T	A	G	A	G	A	T	G	C	T	T	T	T	C	T	G	A	T	G
A	A	T	T	C	N	G	A	G	G	A	T	G	A	A	G	G	A	G	G	G	G	A	A	A	A	G	G	G	G	G	T	A	A	T	A	G	G	A	A	G	G	G	G	A	G	T	T	G	A
T	T	T	A	A	N	C	C	C	A	T	G	C	C	A	A	A	A	A	A	A	A	A	T	T	C	A	A	A	A	A	T	C	A	G	A	C	A	A	T	A	A	A	A	T	A	G	G	A	A
G	G	G	A	T	N	A	T	C	A	G	T	A	T	C	G	A	C	A	A	A	A	C	G	G	T	A	A	A	A	A	G	T	G	A	C	A	A	C	G	A	A	A	A	G	A	T	A	A	C
A	A	T	G	G	N	T	T	G	C	A	A	T	A	A	C	C	A	C	C	C	C	A	A	A	T	C	C	C	C	C	T	T	G	A	A	T	C	A	A	C	C	C	C	A	C	A	A	C	A
A	A	C	A	A	N	G	C	T	A	A	T	G	A	T	A	A	T	A	A	A	A	T	A	A	C	A	A	A	A	A	C	C	T	A	T	G	A	T	A	A	A	A	A	A	A	T	A	A	T
A	A	C	G	A	N	A	A	G	T	A	A	A	G	G	T	T	G	T	T	T	T	G	A	A	A	T	T	T	T	T	C	A	T	T	G	A	T	G	A	T	T	T	T	A	T	A	T	T	G
T	T	G	G	A	N	A	T	A	G	T	C	A	A	A	G	G	A	G	G	G	G	A	T	T	T	G	G	G	G	G	G	T	C	T	A	A	G	A	T	G	G	G	G	T	G	C	T	G	A
T	T	A	G	T	N	A	G	A	A	T	T	A	G	G	A	A	G	A	A	A	A	G	T	T	G	A	A	A	A	A	A	G	C	G	G	A	A	G	T	A	A	A	A	T	A	T	G	A	G
G	G	A	G	T	N	T	G	C	G	G	G	T	G	C	A	G	C	G	G	G	G	C	G	G	G	G	G	G	G	G	A	G	G	C	C	T	G	C	G	G	G	G	G	G	G	G	C	G	C
C	C	C	T	G	N	T	C	A	C	C	C	T	G	A	A	C	A	C	C	C	C	A	C	C	C	C	C	C	C	C	C	C	A	T	A	T	C	A	C	C	C	C	C	C	C	C	T	C	A
T	T	A	G	C	N	G	A	T	A	T	T	G	G	T	T	A	T	A	A	A	A	T	T	T	A	A	A	A	A	A	A	A	A	T	T	G	A	T	T	A	A	A	A	T	A	T	T	A	T
T	T	A	T	T	N	C	G	G	T	T	G	C	T	G	T	T	G	T	T	T	T	G	T	T	G	T	T	T	T	T	A	G	G	G	G	C	T	G	T	T	T	T	T	T	T	G	G	T	G
G	G	C	A	T	N	T	A	A	G	G	C	T	G	A	G	G	A	G	G	G	G	A	G	G	A	G	G	G	G	G	C	A	G	G	A	T	G	A	G	G	G	G	G	G	G	C	G	G	A
G	G	T	T	G	N	T	C	G	A	G	C	T	T	A	C	A	A	A	A	A	A	A	G	G	C	A	A	A	A	A	T	C	T	T	A	T	A	A	G	A	A	A	A	G	A	C	T	A	A
T	T	G	A	G	N	G	G	C	A	T	G	G	A	A	T	A	A	A	A	A	A	A	T	T	G	A	A	A	A	A	G	G	C	A	A	G	A	A	T	A	A	A	A	T	A	G	A	A	A
A	A	G	C	T	N	G	G	A	A	A	T	G	T	T	T	A	T	A	A	A	A	T	A	A	G	A	A	A	A	A	G	G	T	C	T	G	A	T	A	A	A	A	A	A	A	T	C	A	T
C	C	A	T	A	N	T	G	T	T	C	G	T	A	T	G	T	T	T	T	T	T	T	C	C	G	T	T	T	T	T	A	G	T	A	T	T	T	T	C	T	T	T	T	C	T	G	A	T	T
A	A	C	G	C	N	A	C	G	T	A	A	A	C	G	G	T	G	T	T	T	T	G	A	A	C	T	T	T	T	T	C	C	A	C	G	A	T	G	A	T	T	T	T	A	T	A	C	T	G
C	C	T	C	A	N	C	G	A	G	C	A	C	T	C	T	G	C	G	G	G	G	C	C	C	G	G	G	G	G	G	T	G	A	G	C	C	G	C	C	G	G	G	G	C	G	A	G	G	C
G	G	T	T	C	N	A	A	A	C	G	C	A	G	T	A	C	T	C	C	C	C	T	G	G	A	C	C	C	C	C	T	A	T	G	T	A	C	T	G	C	C	C	C	G	C	C	G	C	T
G	G	T	G	G	N	C	T	A	T	G	A	C	C	T	C	T	T	T	T	T	T	T	G	G	T	T	T	T	T	T	T	T	G	A	T	C	T	T	G	T	T	T	T	G	T	A	A	T	T
A	A	A	C	G	N	G	T	T	T	A	T	G	T	G	A	T	G	T	T	T	T	G	A	A	T	T	T	T	T	T	A	T	A	A	G	G	T	G	A	T	T	T	T	A	T	T	A	T	G
A	A	T	C	A	N	G	T	T	G	A	G	G	G	G	C	G	G	G	G	G	G	G	A	A	T	G	G	G	G	G	T	T	C	C	G	G	G	G	A	G	G	G	G	A	G	G	C	G	G
C	C	T	G	A	N	A	T	G	G	C	A	A	C	T	G	G	T	G	G	G	G	T	C	C	T	G	G	G	G	G	T	T	A	G	T	A	G	T	C	G	G	G	G	C	G	A	G	G	T
G	G	G	T	C	N	A	G	C	T	G	G	A	C	A	G	T	A	T	T	T	T	A	G	G	G	T	T	T	T	T	G	G	A	T	A	A	T	A	G	T	T	T	T	G	T	G	T	T	A
T	T	A	G	G	N	C	T	T	A	T	C	C	G	C	A	A	C	A	A	A	A	C	T	T	T	A	A	A	A	A	A	T	C	T	C	C	A	C	T	A	A	A	A	T	A	C	T	A	C
T	T	C	A	T	N	G	T	T	C	T	A	G	T	A	A	C	A	C	C	C	C	A	T	T	T	C	C	C	C	C	C	T	C	C	A	G	C	A	T	C	C	C	C	T	C	A	C	C	A
C	C	A	A	T	N	T	A	G	A	C	T	T	G	C	C	A	C	A	A	A	A	C	C	C	A	A	A	A	A	A	A	A	T	T	C	T	A	C	C	A	A	A	A	C	A	T	T	A	C
T	T	C	C	C	N	T	A	G	C	T	G	T	A	G	G	C	G	C	C	C	C	G	T	T	A	C	C	C	C	C	C	A	T	G	G	T	C	G	T	C	C	C	C	T	C	G	G	C	G
G	G	T	A	T	N	C	A	T	G	G	A	C	A	G	T	G	G	G	G	G	G	G	G	G	A	G	G	G	G	G	T	A	C	A	G	C	G	G	G	G	G	G	G	G	G	A	A	G	G
A	A	A	T	G	N	T	G	A	G	A	A	T	C	A	T	G	A	G	G	G	G	A	A	A	G	G	G	G	G	G	A	G	T	A	A	T	G	A	A	G	G	G	G	A	G	A	A	G	A
A	A	A	G	A	N	G	C	C	A	A	A	G	A	A	C	A	A	A	A	A	A	A	A	A	C	A	A	A	A	A	A	C	T	A	A	G	A	A	A	A	A	A	A	A	A	A	A	A	A
A	A	G	A	A	N	A	C	A	A	A	T	A	T	C	T	A	C	A	A	A	A	C	A	A	C	A	A	A	A	A	G	C	G	A	C	A	A	C	A	A	A	A	A	A	A	T	A	A	C
A	A	A	G	A	N	A	A	C	C	A	T	A	G	G	G	C	G	C	C	C	C	G	A	A	A	C	C	C	C	C	A	A	A	G	G	A	C	G	A	C	C	C	C	A	C	T	G	C	G
G	G	G	C	A	N	A	C	G	G	G	G	A	A	T	A	G	T	G	G	G	G	T	G	G	C	G	G	G	G	G	G	C	A	A	T	A	G	T	G	G	G	G	G	G	G	G	A	G	T
A	A	G	A	G	N	A	T	G	T	A	C	A	G	T	A	T	T	T	T	T	T	T	A	A	T	T	T	T	T	T	G	T	A	G	T	A	T	T	A	T	T	T	T	A	T	C	G	T	T
G	G	G	T	A	N	G	T	A	T	G	T	G	C	C	A	T	C	T	T	T	T	C	G	G	T	T	T	T	T	T	G	T	T	C	C	G	T	C	G	T	T	T	T	G	T	T	C	T	C
C	C	G	G	G	N	A	G	A	C	C	T	A	A	T	A	C	T	C	C	C	C	T	C	C	G	C	C	C	C	C	G	G	A	T	T	A	C	T	C	C	C	C	C	C	C	T	T	C	T
T	T	T	A	C	N	G	C	C	T	T	G	G	T	G	G	T	G	T	T	T	T	G	T	T	C	T	T	T	T	T	T	C	C	A	G	G	T	G	T	T	T	T	T	T	T	G	A	T	G
A	A	G	A	T	N	C	G	G	G	A	G	C	G	A	A	G	A	G	G	G	N	A	A	A	G	G	G	N	G	G	G	G	T	T	A	C	G	A	A	G	G	G	G	A	G	G	T	G	A
T	T	T	A	A	N	T	A	T	A	T	T	T	A	A	G	A	A	A	A	A	A	A	T	T	A	A	A	A	A	A	T	A	C	G	A	T	A	A	T	A	A	A	A	T	A	T	G	A	A
G	G	A	T	T	N	A	A	T	A	G	A	A	A	A	C	A	A	A	A	A	A	A	G	G	A	A	A	A	A	A	A	A	C	A	A	A	A	A	G	A	A	A	A	G	A	A	A	A	A
A	A	T	T	G	N	T	T	C	A	A	C	T	A	A	T	A	A	A	A	A	A	A	A	A	T	A	A	A	A	A	T	T	A	A	A	T	A	A	A	A	A	A	A	A	A	C	A	A	A
A	A	A	G	A	N	G	T	T	A	A	A	G	T	G	A	A	G	A	A	A	A	G	A	A	T	A	A	A	A	A	A	T	A	T	G	G	A	G	A	A	A	A	A	A	A	A	T	A	G
T	T	C	C	A	N	A	T	G	G	T	C	A	T	A	T	G	A	G	G	G	G	A	T	T	T	G	G	G	G	G	C	T	A	T	A	A	G	A	T	G	G	G	G	T	G	C	T	G	A
T	T	T	T	T	N	A	T	A	A	T	G	A	G	G	G	A	G	A	A	A	A	G	T	T	T	A	A	A	A	A	T	T	A	G	G	A	A	G	T	A	A	A	A	T	A	G	G	A	G
G	G	G	T	T	N	T	G	A	G	G	G	T	C	C	A	G	C	G	G	G	G	C	G	G	G	G	G	G	G	G	G	G	A	C	C	T	G	C	G	G	G	G	G	G	G	G	C	G	C
C	C	C	G	G	N	T	T	A	C	C	A	T	T	T	A	C	T	C	C	C	C	T	C	C	T	C	C	C	C	C	C	T	G	A	T	T	C	T	C	C	C	C	C	C	C	A	A	C	T
A	A	T	G	C	N	G	G	A	T	A	A	G	T	A	T	T	A	T	T	T	T	A	A	A	G	T	T	T	T	T	T	G	A	G	A	G	T	A	A	T	T	T	T	A	T	A	G	T	A
G	G	G	T	A	N	C	G	G	A	G	C	C	G	T	T	A	T	A	A	A	A	T	G	G	G	A	A	A	A	A	G	G	G	A	T	C	A	T	G	A	A	A	A	G	A	C	A	A	T
A	A	C	A	G	N	A	C	A	T	A	G	A	G	G	G	T	G	T	T	T	T	G	A	A	C	T	T	T	T	T	C	C	A	C	G	A	T	G	A	T	T	T	T	A	T	G	C	T	G
C	C	C	C	A	N	G	A	G	G	C	T	G	T	A	C	G	A	G	G	G	G	A	C	C	A	G	G	G	G	G	C	A	A	A	A	G	G	A	C	G	G	G	G	C	G	T	A	G	A
A	A	G	A	C	N	A	C	C	A	A	T	A	A	A	A	A	A	A	A	A	A	A	A	A	C	A	A	A	A	A	G	C	A	C	A	A	A	A	A	A	A	A	A	A	A	T	C	A	A
C	C	T	C	A	N	C	T	T	A	C	C	C	C	T	G	A	T	A	A	A	A	T	C	C	T	A	A	A	A	A	T	T	G	C	T	C	A	T	C	A	A	A	A	C	A	C	C	A	T
C	C	G	G	C	N	A	G	A	T	C	T	A	A	T	A	T	T	T	T	T	T	T	C	C	G	T	T	T	T	T	G	G	T	T	T	A	T	T	C	T	T	T	T	C	T	T	T	T	T
T	T	A	G	C	N	C	A	T	T	T	G	C	C	G	C	T	G	T	T	T	T	G	T	T	A	T	T	T	T	T	A	A	C	T	G	C	T	G	T	T	T	T	T	T	T	G	T	T	G
T	T	A	A	T	N	C	G	G	G	T	A	C	G	C	A	G	C	G	G	G	G	C	T	T	G	G	G	G	G	G	A	G	A	T	C	C	G	C	T	G	G	G	G	T	G	A	T	G	C
T	T	C	A	T	N	T	A	A	C	T	A	T	G	A	C	C	A	C	C	C	C	A	T	T	A	C	C	C	C	C	C	A	A	T	A	T	C	A	T	C	C	C	C	T	C	A	T	C	A
T	T	A	C	T	N	T	A	A	A	T	A	T	A	G	C	A	G	A	A	A	A	G	T	T	A	A	A	A	A	A	A	A	C	G	G	T	A	G	T	A	A	A	A	T	A	A	G	A	G
G	G	T	G	T	N	T	T	T	G	G	A	T	A	A	T	G	A	G	G	G	G	A	G	G	T	G	G	G	G	G	T	T	A	A	A	T	G	A	G	G	G	G	G	G	G	A	A	G	A
A	A	G	T	G	N	T	T	T	A	A	G	T	C	C	T	A	C	A	A	A	A	C	A	A	T	A	A	A	A	A	G	T	T	A	C	T	A	C	A	A	A	A	A	A	A	G	A	A	C
A	A	A	T	A	N	G	T	G	C	A	A	G	G	A	T	C	A	C	C	C	C	A	A	A	T	C	C	C	C	C	A	T	C	A	A	G	C	A	A	C	C	C	C	A	C	A	A	C	A
A	A	G	C	A	N	A	G	C	A	A	G	A	T	C	T	A	C	A	A	A	A	C	A	A	G	A	A	A	A	A	G	G	A	T	C	A	A	C	A	A	A	A	A	A	A	G	T	A	C
T	T	C	T	A	N	A	A	A	C	T	C	A	T	C	G	C	C	C	C	C	C	C	T	T	A	C	C	C	C	C	C	A	A	T	C	A	C	C	T	C	C	C	C	T	C	C	T	C	C
T	T	A	G	T	N	A	C	G	C	T	T	A	C	T	A	C	T	C	C	C	C	T	T	T	C	C	C	C	C	C	A	C	T	A	T	A	C	T	T	C	C	C	C	T	C	T	A	C	T
A	A	T	A	T	N	T	T	A	T	A	A	T	T	T	A	T	T	T	T	T	T	T	A	A	T	T	T	T	T	T	T	T	A	A	T	T	T	T	A	T	T	T	T	A	T	A	A	T	T
A	A	G	A	A	N	T	A	C	T	A	T	T	G	T	A	T	T	T	T	T	T	T	A	A	A	T	T	T	T	T	G	A	T	A	T	T	T	T	A	T	T	T	T	A	T	T	A	T	T
A	A	A	A	A	C	A	A	A	T	A	G	A	A	T	T	T	T	T	T	T	T	T	A	A	A	T	T	T	T	T	A	A	T	T	T	A	T	T	A	T	T	T	T	A	T	G	T	T	T
T	T	A	A	A	C	A	A	C	T	T	A	A	A	G	T	T	G	T	T	T	T	G	T	T	A	T	T	T	T	T	A	A	G	T	G	A	T	G	T	T	T	T	T	T	T	A	T	T	G
T	T	A	G	T	A	A	G	C	G	T	A	A	A	A	A	G	A	G	G	G	G	A	T	T	G	G	G	G	G	G	A	G	T	G	A	A	G	A	T	G	G	G	G	T	G	A	G	G	A
G	G	T	A	T	A	T	A	T	A	G	T	T	A	A	A	A	A	A	A	A	A	A	G	G	A	A	A	A	A	A	T	A	T	G	A	T	A	A	G	A	A	A	A	G	A	T	G	A	A
G	G	T	G	G	G	T	A	T	A	G	T	T	G	A	A	A	A	A	A	A	A	A	G	G	A	A	A	A	A	A	T	A	G	C	A	T	A	A	G	A	A	A	A	G	A	T	C	A	A
C	C	G	C	G	G	G	G	T	A	C	G	G	A	T	T	A	T	A	A	A	A	T	C	C	G	A	A	A	A	A	G	G	G	A	T	G	A	T	C	A	A	A	A	C	A	G	A	A	T
A	A	C	T	C	G	G	G	T	T	A	C	G	G	T	T	T	T	T	T	T	T	T	A	A	G	T	T	T	T	T	C	G	T	A	T	G	T	T	A	T	T	T	T	A	T	C	A	T	T
A	A	T	A	A	T	C	T	G	T	A	A	C	C	A	G	T	A	T	T	T	T	A	A	A	T	T	T	T	T	T	T	T	G	A	A	C	T	A	A	T	T	T	T	A	T	A	A	T	A
A	A	T	T	A	T	A	G	A	A	A	G	A	T	A	G	A	A	A	A	A	A	A	A	A	G	A	A	A	A	A	T	G	A	G	A	A	A	A	A	A	A	A	A	A	A	G	G	A	A
G	G	G	G	A	G	A	C	A	A	G	A	A	A	A	C	A	A	A	A	A	A	A	G	G	C	A	A	A	A	A	G	C	C	A	A	A	A	A	G	A	A	A	A	G	A	A	A	A	A
A	A	G	A	G	A	A	C	A	A	A	C	A	T	T	A	A	T	A	A	A	A	T	A	A	C	A	A	A	A	A	G	C	T	A	T	A	A	T	A	A	A	A	A	A	A	C	A	A	T
A	A	T	A	A	A	G	A	T	T	A	A	G	G	T	A	T	T	T	T	T	T	T	A	A	A	T	T	T	T	T	T	A	T	A	T	G	T	T	A	T	T	T	T	A	T	A	A	T	T
A	A	A	T	A	A	A	C	T	T	A	C	A	A	G	A	T	G	T	T	T	T	G	A	A	C	T	T	T	T	T	A	C	T	T	G	A	T	G	A	T	T	T	T	A	T	C	T	T	G
T	T	C	T	A	A	A	T	A	G	T	C	A	A	G	G	G	G	G	G	G	G	G	T	T	T	G	G	G	G	G	C	T	A	T	G	A	G	G	T	G	G	G	G	T	G	C	T	G	G
T	T	A	G	T	G	A	A	A	G	T	T	A	T	C	A	G	C	G	G	G	G	C	T	T	A	G	G	G	G	G	A	A	A	T	C	A	G	C	T	G	G	G	G	T	G	T	T	G	C
T	T	C	C	T	A	T	C	A	C	T	T	T	T	A	A	C	A	C	C	C	C	A	T	T	C	C	C	C	C	C	C	C	A	G	A	T	C	A	T	C	C	C	C	T	C	T	G	C	A
G	G	G	A	T	A	T	T	T	A	G	T	T	G	A	A	A	A	A	A	A	A	A	G	G	T	A	A	A	A	A	G	T	C	A	A	T	A	A	G	A	A	A	A	G	A	T	A	A	A
A	A	G	G	G	A	T	T	T	A	A	T	T	C	A	T	A	A	A	A	A	A	A	A	A	T	A	A	A	A	A	G	T	T	C	A	T	A	A	A	A	A	A	A	A	A	T	C	A	A
C	C	A	A	A	A	G	G	G	A	C	G	G	A	G	T	A	G	A	A	A	A	G	C	C	G	A	A	A	A	A	A	G	T	A	G	G	A	G	C	A	A	A	A	C	A	G	A	A	G
A	A	A	C	C	A	A	T	G	G	A	A	A	G	A	T	G	A	G	G	G	G	A	A	A	T	G	G	G	G	G	A	T	A	C	A	A	G	A	A	G	G	G	G	A	G	A	C	G	A
C	C	C	A	A	G	C	G	C	A	C	A	C	A	A	G	A	A	A	A	A	A	A	C	C	G	A	A	A	A	A	C	G	A	C	A	C	A	A	T	A	A	A	A	C	A	A	C	A	A
C	C	G	C	C	C	A	G	A	A	C	A	A	C	A	A	A	A	A	A	A	A	A	C	C	G	A	A	A	A	A	G	G	T	T	A	A	A	A	C	A	A	A	A	C	A	A	T	A	A
T	T	T	C	C	T	C	T	A	A	T	T	C	A	T	C	A	T	A	A	A	A	T	T	T	T	A	A	A	A	A	T	T	G	T	T	C	A	T	T	A	A	A	A	T	A	T	T	A	T
T	T	T	T	T	T	C	T	A	T	T	T	C	C	T	A	T	T	T	T	T	T	T	T	T	T	T	T	T	T	T	T	T	A	C	T	C	T	T	T	T	T	T	T	T	T	T	C	T	T
C	C	C	T	T	G	T	A	G	T	C	A	T	C	T	C	T	T	T	T	T	T	T	C	C	A	T	T	T	T	T	C	A	A	A	T	T	T	T	C	T	T	T	T	C	T	A	A	T	T
A	A	T	T	C	A	T	C	A	T	A	A	T	T	G	C	T	G	T	T	T	T	G	A	A	C	T	T	T	T	T	T	C	G	A	G	T	T	G	A	T	T	T	T	A	T	A	A	T	G
A	A	G	T	A	T	C	T	A	G	A	A	C	T	A	T	G	A	G	G	G	G	A	A	A	T	G	G	G	G	G	G	T	A	T	A	C	G	A	A	G	G	G	G	A	G	A	T	G	A
T	T	A	G	A	G	A	T	A	A	T	T	A	T	C	T	A	C	A	A	A	A	C	T	T	T	A	A	A	A	A	A	T	G	G	C	A	A	C	T	A	A	A	A	T	A	T	G	A	C
G	G	A	A	T	G	A	A	T	C	G	T	A	T	A	C	C	A	C	C	C	C	A	G	G	A	C	C	C	C	C	A	A	A	G	A	A	C	A	G	C	C	C	C	G	C	T	G	C	A
G	G	A	A	G	N	T	C	T	A	G	G	T	G	T	A	A	C	A	A	A	A	T	G	G	C	A	A	A	A	A	A	C	T	G	C	T	A	C	G	A	A	A	A	G	A	G	G	A	C
G	G	A	A	G	N	G	C	T	C	G	G	G	A	C	A	T	C	C	C	C	C	C	G	G	C	C	C	C	C	C	A	C	C	G	C	G	C	C	G	C	T	C	C	G	C	G	G	C	C
G	G	G	T	G	N	G	C	G	C	G	C	G	A	T	T	C	T	C	C	C	C	T	G	G	C	C	C	C	C	C	G	C	G	A	T	G	C	T	G	C	C	C	C	G	C	C	A	C	T
A	A	A	T	G	N	G	C	A	T	A	A	G	A	T	G	T	T	T	T	T	T	T	A	A	C	T	T	T	T	T	A	C	C	A	T	G	T	T	A	T	T	T	T	A	T	A	A	T	T
A	A	G	A	A	N	G	A	C	T	A	A	G	T	C	G	T	C	T	T	T	T	C	A	A	A	T	T	T	T	T	G	A	C	T	C	G	T	C	A	T	T	T	T	A	T	A	T	T	C
T	T	C	A	A	T	A	A	A	C	T	A	A	T	A	G	C	A	C	C	C	C	A	T	T	A	C	C	C	C	C	C	A	A	G	A	A	C	A	T	C	C	C	C	T	C	A	G	C	A
G	G	T	A	T	G	A	A	C	A	G	G	A	A	A	G	A	A	A	A	A	A	A	G	G	A	A	A	A	A	A	T	A	T	T	A	A	A	A	G	A	A	A	A	G	A	G	T	A	A
T	T	A	T	G	G	T	A	C	A	T	A	T	A	T	A	A	T	A	A	A	A	T	T	T	A	A	A	A	A	A	A	A	T	C	T	T	A	T	T	A	A	A	A	T	A	A	C	A	T
C	C	T	T	T	G	G	T	T	T	C	A	G	A	G	A	T	G	T	T	T	T	G	C	C	T	T	T	T	T	T	T	T	A	C	G	G	T	G	C	T	T	T	T	C	T	A	C	T	G
C	C	G	G	C	T	T	G	T	G	C	A	T	T	G	T	G	G	G	G	G	G	G	C	C	G	G	G	G	G	G	G	G	T	A	G	T	G	G	C	G	G	G	G	C	G	A	A	G	G
A	A	A	G	C	N	C	C	C	G	A	T	C	T	G	G	G	G	G	G	G	G	G	A	A	C	G	G	G	G	G	A	C	T	A	G	C	G	G	A	G	G	G	G	A	G	T	A	G	G
A	A	A	C	A	N	C	T	A	G	A	T	C	G	G	T	G	G	G	G	G	G	G	A	A	T	G	G	G	G	G	A	T	T	A	G	C	G	G	A	G	G	G	G	A	G	T	A	G	G
A	A	T	A	A	N	A	G	A	G	A	T	A	G	A	C	G	A	G	G	G	G	A	A	A	G	G	G	G	G	G	T	G	T	T	A	A	G	A	A	G	G	G	G	A	G	T	T	G	A
T	T	T	A	A	N	A	T	T	A	T	G	A	C	A	C	A	A	A	A	A	A	A	T	T	T	A	A	A	A	A	T	T	G	T	A	A	A	A	T	A	A	A	A	T	A	G	T	A	A
T	T	G	A	T	N	A	T	G	A	T	A	A	A	T	A	A	T	A	A	A	A	T	T	T	T	A	A	A	A	A	G	T	G	T	T	A	A	T	T	A	A	A	A	T	A	A	T	A	T
T	T	C	G	T	N	T	G	G	T	T	C	T	A	G	A	T	G	T	T	T	T	G	T	T	G	T	T	T	T	T	C	G	C	T	G	T	T	G	T	T	T	T	T	T	T	C	T	T	G
T	T	A	A	T	N	T	T	G	G	T	A	T	A	T	A	G	T	G	G	G	G	T	T	T	T	G	G	G	G	G	A	T	A	G	T	T	G	T	T	G	G	G	G	T	G	A	G	G	T
G	G	G	A	T	N	T	T	G	T	G	C	T	G	C	T	T	C	T	T	T	T	C	G	G	T	T	T	T	T	T	G	T	T	T	C	T	T	C	G	T	T	T	T	G	T	C	T	T	C
T	T	A	A	G	N	T	A	A	C	T	C	T	A	C	T	C	C	C	C	C	C	C	T	T	A	C	C	C	C	C	A	A	C	A	C	T	C	C	T	C	C	C	C	T	C	C	A	C	C
A	A	C	T	T	N	G	A	A	C	A	T	G	A	A	T	C	A	C	C	C	C	A	A	A	A	C	C	C	C	C	C	A	T	T	A	G	C	A	A	C	C	C	C	A	C	T	T	C	A
T	T	A	T	A	N	T	A	T	A	T	T	T	A	A	T	A	A	A	A	A	A	A	T	T	A	A	A	A	A	A	A	A	T	T	A	T	A	A	T	A	A	A	A	T	A	T	T	A	A
T	T	C	T	T	N	A	A	G	A	T	C	A	T	A	G	A	A	A	A	A	A	A	T	T	A	A	A	A	A	A	C	A	T	T	A	A	A	A	T	A	A	A	A	T	A	C	T	A	A
T	T	C	G	T	N	T	T	T	A	T	A	T	T	T	T	A	T	A	A	A	A	T	T	T	T	A	A	A	A	A	C	T	T	C	T	T	A	T	T	A	A	A	A	T	A	A	C	A	T
C	C	T	A	T	N	T	T	C	T	C	A	T	T	T	A	T	T	T	T	T	T	T	C	C	T	T	T	T	T	T	T	T	T	C	T	T	T	T	C	T	T	T	T	C	T	A	C	T	T
C	C	T	C	C	N	T	T	C	T	C	T	T	G	T	T	T	T	T	T	T	T	T	C	C	T	T	T	T	T	T	T	T	C	C	T	T	T	T	C	T	T	T	T	C	T	T	C	T	T
C	C	T	A	C	N	C	A	A	T	C	G	C	A	T	T	T	T	T	T	T	T	T	C	C	A	T	T	T	T	T	T	A	T	T	T	C	T	T	C	T	T	T	T	C	T	G	T	T	T
T	T	T	T	C	N	C	T	A	T	T	G	C	C	G	T	T	G	T	T	T	T	G	T	T	T	T	T	T	T	T	T	T	G	T	G	C	T	G	T	T	T	T	T	T	T	G	T	T	G
T	T	G	C	T	N	C	T	A	G	T	G	C	A	T	C	G	T	G	G	G	G	T	T	T	T	G	G	G	G	G	G	T	C	A	T	C	G	T	T	G	G	G	G	T	G	G	A	G	T
A	A	A	T	T	N	T	G	T	T	A	G	T	C	A	C	T	A	T	T	T	T	A	A	A	G	T	T	T	T	T	A	G	T	A	A	T	T	A	A	T	T	T	T	A	T	G	A	T	A
A	A	A	T	A	N	T	T	T	A	A	A	T	C	T	C	A	T	A	A	A	A	T	A	A	T	A	A	A	A	A	A	T	T	A	T	T	A	T	A	A	A	A	A	A	A	A	A	A	T
A	A	A	C	A	N	A	C	T	T	A	A	A	T	T	T	T	T	T	T	T	T	T	A	A	C	T	T	T	T	T	A	C	C	T	T	A	T	T	A	T	T	T	T	A	T	A	T	T	T
T	T	T	A	A	N	A	C	T	T	T	T	A	T	T	T	T	T	T	T	T	T	T	T	T	C	T	T	T	T	T	T	C	C	T	T	A	T	T	T	T	T	T	T	T	T	T	T	T	T
T	T	T	A	T	N	A	A	G	T	T	G	A	C	C	A	T	C	T	T	T	T	C	T	T	A	T	T	T	T	T	T	A	A	C	C	A	T	C	T	T	T	T	T	T	T	G	C	T	C
C	C	A	T	T	N	T	G	T	C	C	T	T	A	C	A	C	C	C	C	C	C	C	C	C	G	C	C	C	C	C	A	G	C	C	C	T	C	C	C	C	C	C	C	C	C	T	C	C	C
C	C	A	G	C	N	T	C	A	C	C	C	T	A	C	A	C	C	C	C	C	C	C	C	C	C	C	C	C	C	C	A	C	A	A	C	T	C	C	C	C	C	C	C	C	C	C	A	C	C
A	A	A	G	C	N	C	A	T	C	A	C	C	T	T	T	C	T	C	C	C	C	T	A	A	A	C	C	C	C	C	A	A	A	T	T	C	C	T	A	C	C	C	C	A	C	C	T	C	T
T	T	T	G	A	N	C	T	T	T	T	A	C	G	T	T	T	T	T	T	T	T	T	T	T	T	T	T	T	T	T	T	T	G	A	T	C	T	T	T	T	T	T	T	T	T	A	A	T	T
A	A	T	G	T	N	A	G	T	T	A	A	A	G	A	C	T	A	T	T	T	T	A	A	A	G	T	T	T	T	T	T	G	T	A	A	A	T	A	A	T	T	T	T	A	T	A	A	T	A
A	A	G	A	A	N	T	T	C	A	A	A	T	G	A	C	A	A	A	A	A	A	A	A	A	T	A	A	A	A	A	G	T	G	T	A	T	A	A	A	A	A	A	A	A	A	A	T	A	A
T	T	G	A	A	N	A	C	C	A	T	T	A	G	A	A	A	A	A	A	A	A	A	T	T	C	A	A	A	A	A	G	C	C	C	A	A	A	A	T	A	A	A	A	T	A	T	C	A	A
C	C	C	T	T	C	A	A	C	A	C	T	A	A	T	T	A	T	A	A	A	A	T	C	C	A	A	A	A	A	A	C	A	T	A	T	A	A	T	C	A	A	A	A	C	A	T	A	A	T
A	A	A	G	C	C	T	C	T	T	A	T	T	A	T	A	T	T	T	T	T	T	T	A	A	C	T	T	T	T	T	A	C	T	A	T	T	T	T	A	T	T	T	T	A	T	T	A	T	T
A	A	A	T	A	A	C	A	T	T	A	T	C	T	C	A	T	C	T	T	T	T	C	A	A	A	T	T	T	T	T	A	A	T	G	C	C	T	C	A	T	T	T	T	A	T	T	G	T	C
G	G	A	C	A	A	A	A	A	C	G	G	A	G	C	T	C	C	C	C	C	C	C	G	G	A	C	C	C	C	C	A	A	T	A	C	A	C	C	G	C	C	C	C	G	C	G	A	C	C
A	A	G	C	G	A	A	T	A	C	A	T	A	T	A	C	C	A	C	C	C	C	A	A	A	T	C	C	C	C	C	G	T	G	C	A	A	C	A	A	C	C	C	C	A	C	T	C	C	A
C	C	A	A	A	T	G	T	A	A	C	A	G	C	T	A	A	T	A	A	A	A	T	C	C	T	A	A	A	A	A	A	T	T	T	T	G	A	T	C	A	A	A	A	C	A	A	T	A	T
T	T	A	A	C	G	A	C	T	T	T	T	A	C	A	A	T	A	T	T	T	T	A	T	T	C	T	T	T	T	T	A	C	G	A	A	A	T	A	T	T	T	T	T	T	T	T	A	T	A
A	A	A	A	T	A	C	A	T	A	A	T	C	A	A	G	A	A	A	A	A	A	A	A	A	A	A	A	A	A	A	A	A	G	T	A	C	A	A	A	A	A	A	A	A	A	T	T	A	A
T	T	T	T	A	A	T	G	C	A	T	T	T	A	T	A	A	T	A	A	A	A	T	T	T	G	A	A	A	A	A	T	G	A	T	T	T	A	T	T	A	A	A	A	T	A	T	T	A	T
T	T	T	T	T	N	A	A	C	T	T	C	A	A	C	C	T	C	T	T	T	T	C	T	T	A	T	T	T	T	T	T	A	A	C	C	A	T	C	T	T	T	T	T	T	T	C	C	T	C
C	C	T	T	T	N	T	A	A	C	C	C	T	T	A	T	C	A	C	C	C	C	A	C	C	A	C	C	C	C	C	T	A	A	A	A	T	C	A	C	C	C	C	C	C	C	C	A	C	A
A	A	G	T	C	N	T	G	T	A	A	C	T	T	A	A	A	A	A	A	A	A	A	A	A	G	A	A	A	A	A	G	G	C	A	A	T	A	A	A	A	A	A	A	A	A	C	A	A	A
A	A	A	G	A	N	C	T	A	A	A	T	C	T	G	T	A	G	A	A	A	A	G	A	A	T	A	A	A	A	A	A	T	T	C	G	C	A	G	A	A	A	A	A	A	A	T	C	A	G
C	C	C	T	A	N	A	A	A	G	C	T	A	T	A	T	G	A	G	G	G	G	A	C	C	A	G	G	G	G	G	C	A	G	C	A	A	G	A	C	G	G	G	G	C	G	T	C	G	A
C	C	A	A	C	N	A	G	T	A	C	A	A	G	C	C	A	C	A	A	A	A	C	C	C	G	A	A	A	A	A	A	G	T	A	C	A	A	C	C	A	A	A	A	C	A	A	A	A	C
A	A	C	T	C	N	C	G	C	C	A	A	C	T	T	A	C	T	C	C	C	C	T	A	A	G	C	C	C	C	C	N	G	G	A	T	C	C	T	A	C	C	C	C	A	C	A	A	C	T
A	A	C	T	A	N	C	A	A	T	A	A	C	A	A	A	T	A	T	T	T	T	A	A	A	A	T	T	T	T	T	C	A	A	G	A	C	T	A	A	T	T	T	T	A	T	A	G	T	A
G	G	T	T	A	N	A	C	A	A	G	T	A	T	T	C	A	T	A	A	A	A	T	G	G	C	A	A	A	A	A	T	C	A	G	T	A	A	T	G	A	A	A	A	G	A	T	G	A	T
G	G	T	C	G	N	A	C	G	T	G	T	A	T	T	C	T	T	T	T	T	T	T	G	G	C	T	T	T	T	T	T	C	A	G	T	A	T	T	G	T	T	T	T	G	T	T	G	T	T
G	G	C	C	G	N	G	T	A	T	G	C	G	T	C	A	T	C	T	T	T	T	C	G	G	T	T	T	T	T	T	C	T	G	T	C	G	T	C	G	T	T	T	T	G	T	C	T	T	C
T	T	A	C	G	N	G	G	C	C	T	C	G	C	A	A	C	A	C	C	C	C	A	T	T	G	C	C	C	C	C	A	G	G	T	A	G	C	A	T	C	C	C	C	T	C	C	T	C	A
T	T	A	T	T	N	G	A	T	A	T	A	G	C	A	G	A	A	A	A	A	A	A	T	T	A	A	A	A	A	A	A	A	T	G	A	G	A	A	T	A	A	A	A	T	A	A	G	A	A
G	G	T	T	T	N	T	G	A	A	G	T	T	C	C	G	A	C	A	A	A	A	C	G	G	G	A	A	A	A	A	T	G	T	A	C	T	A	C	G	A	A	A	A	G	A	T	A	A	C
A	A	G	A	G	N	T	C	T	C	A	A	T	T	C	G	C	C	C	C	C	C	C	A	A	C	C	C	C	C	C	G	C	T	A	C	T	C	C	A	C	C	C	C	A	C	A	A	C	C
A	A	G	A	A	N	G	A	T	C	A	A	G	T	A	T	C	A	C	C	C	C	A	A	A	A	C	C	C	C	C	G	A	G	A	A	G	C	A	A	C	C	C	C	A	C	A	A	C	A
A	A	G	A	A	N	A	T	C	A	A	T	A	A	A	T	A	A	A	A	A	A	A	A	A	T	A	A	A	A	A	G	T	G	A	A	A	A	A	A	A	A	A	A	A	A	T	A	A	A
A	A	G	T	A	N	A	A	A	A	A	C	A	A	G	G	A	G	A	A	A	A	G	A	A	A	A	A	A	A	A	G	A	A	G	G	A	A	G	A	A	A	A	A	A	A	C	G	A	G
G	G	A	T	A	N	A	G	A	G	G	A	A	A	G	A	G	G	G	G	G	G	G	G	G	G	G	G	G	G	G	A	G	T	A	G	A	G	G	G	G	G	G	G	G	G	A	A	G	G
A	A	A	C	G	N	A	T	C	G	A	A	A	T	G	A	G	G	G	G	G	G	G	A	A	T	G	G	G	G	G	A	T	T	A	G	A	G	G	A	G	G	G	G	A	G	A	A	G	G
A	A	T	C	A	N	G	C	C	G	A	G	G	T	T	A	G	T	G	G	G	G	T	A	A	C	G	G	G	G	G	T	C	A	A	T	G	G	T	A	G	G	G	G	A	G	G	A	G	T
A	A	G	A	A	N	A	T	A	T	A	A	A	C	T	A	T	T	T	T	T	T	T	A	A	T	T	T	T	T	T	G	T	T	A	T	A	T	T	A	T	T	T	T	A	T	A	A	T	T
A	A	T	T	A	N	A	T	A	T	A	C	A	C	G	G	T	G	T	T	T	T	G	A	A	T	T	T	T	T	T	T	T	A	A	G	A	T	G	A	T	T	T	T	A	T	C	A	T	G
A	A	C	A	A	N	A	G	G	G	A	T	A	A	A	A	G	A	G	G	G	G	A	A	A	G	G	G	G	G	G	C	G	A	G	A	A	G	A	A	G	G	G	G	A	G	T	G	G	A
G	G	C	A	A	N	A	C	G	A	G	A	A	T	A	A	A	A	A	A	A	A	A	G	G	C	A	A	A	A	A	C	C	A	C	A	A	A	A	G	A	A	A	A	G	A	A	C	A	A
C	C	A	T	G	N	A	C	G	A	C	T	A	A	A	A	A	A	A	A	A	A	A	C	C	C	A	A	A	A	A	A	C	G	T	A	A	A	A	C	A	A	A	A	C	A	T	T	A	A
T	T	A	C	C	N	G	G	T	A	T	T	G	A	A	A	A	A	A	A	A	A	A	T	T	G	A	A	A	A	A	A	G	C	T	A	G	A	A	T	A	A	A	A	T	A	T	T	A	A
T	T	A	A	T	N	C	A	T	A	T	C	C	T	G	A	A	G	A	A	A	A	G	T	T	A	A	A	A	A	A	A	A	A	G	G	C	A	G	T	A	A	A	A	T	A	C	G	A	G
G	G	T	A	T	N	T	A	G	G	G	A	T	C	A	G	G	A	G	G	G	G	A	G	G	A	G	G	G	G	G	T	A	T	A	A	T	G	A	G	G	G	G	G	G	G	A	A	G	A
A	A	T	G	G	N	T	T	A	A	A	A	T	A	A	C	A	A	A	A	A	A	A	A	A	T	A	A	A	A	A	T	T	T	T	A	T	A	A	A	A	A	A	A	A	A	A	T	A	A
T	T	T	A	A	N	G	A	A	A	T	C	G	A	A	T	A	A	A	A	A	A	A	T	T	A	A	A	A	A	A	T	A	C	G	A	G	A	A	T	A	A	A	A	T	A	C	G	A	A
G	G	T	C	T	N	A	C	A	A	G	C	A	G	A	T	A	A	A	A	A	A	A	G	G	C	A	A	A	A	A	T	C	A	G	A	A	A	A	G	A	A	A	A	G	A	C	G	A	A
G	G	G	T	G	N	T	C	A	A	G	A	T	A	A	G	A	A	A	A	A	A	A	G	G	C	A	A	A	A	A	G	C	A	C	A	T	A	A	G	A	A	A	A	G	A	A	C	A	A
C	C	T	A	G	N	G	A	G	A	C	A	G	C	G	A	A	G	A	A	A	A	G	C	C	A	A	A	A	A	A	T	A	A	T	G	G	A	G	C	A	A	A	A	C	A	A	T	A	G
T	T	A	T	C	N	G	T	A	G	T	G	G	T	C	T	G	C	G	G	G	G	C	T	T	T	G	G	G	G	G	A	T	C	T	C	G	G	C	T	G	G	G	G	T	G	G	T	G	C
T	T	T	T	T	N	C	A	A	C	T	G	C	A	T	G	C	T	C	C	C	C	T	T	T	A	C	C	C	C	C	T	A	A	T	T	C	C	T	T	C	C	C	C	T	C	G	T	C	T
T	T	T	C	T	N	T	A	A	T	T	G	T	T	T	G	T	T	T	T	T	T	T	T	T	A	T	T	T	T	T	T	A	A	A	T	T	T	T	T	T	T	T	T	T	T	G	A	T	T
A	A	T	A	T	N	T	T	A	T	A	T	T	T	G	C	T	G	T	T	T	T	G	A	A	T	T	T	T	T	T	T	T	A	T	G	T	T	G	A	T	T	T	T	A	T	T	T	T	G
T	T	C	A	A	N	T	G	A	G	T	T	T	C	A	T	G	A	G	G	G	G	A	T	T	G	G	G	G	G	G	C	G	T	G	A	T	G	A	T	G	G	G	G	T	G	T	G	G	A
G	G	C	C	T	N	A	A	G	A	G	G	A	A	T	T	A	T	A	A	A	A	T	G	G	A	A	A	A	A	A	C	A	T	G	T	A	A	T	G	A	A	A	A	G	A	G	G	A	T
G	G	C	C	G	N	T	A	C	T	G	A	T	A	G	T	T	G	T	T	T	T	G	G	G	A	T	T	T	T	T	C	A	G	G	G	T	T	G	G	T	T	T	T	G	T	A	G	T	G
G	G	T	A	G	N	G	T	T	G	G	A	G	C	G	A	G	G	G	G	G	G	G	G	G	T	G	G	G	G	G	T	T	T	T	G	G	G	G	G	G	G	G	G	G	G	A	T	G	G
T	T	T	A	G	N	G	C	T	G	T	A	G	C	C	T	G	C	G	G	G	G	C	T	T	C	G	G	G	G	G	T	C	T	A	C	G	G	C	T	G	G	G	G	T	G	A	A	G	C
A	A	A	G	T	N	G	T	G	C	A	A	G	A	T	G	C	T	C	C	C	C	T	A	A	T	C	C	C	C	C	A	T	G	G	T	G	C	T	A	C	C	C	C	A	C	A	G	C	T
G	G	A	G	A	N	T	G	A	T	G	G	T	A	T	G	T	T	T	T	T	T	T	G	G	G	T	T	T	T	T	A	G	A	A	T	T	T	T	G	T	T	T	T	G	T	G	A	T	T
A	A	A	G	G	N	A	G	T	T	A	A	A	G	T	G	T	T	T	T	T	T	T	A	A	G	T	T	T	T	T	A	G	A	A	T	A	T	T	A	T	T	T	T	A	T	A	A	T	T
A	A	T	T	A	N	G	C	G	T	A	A	G	G	A	T	T	A	T	T	T	T	A	A	A	C	T	T	T	T	T	T	C	T	T	A	G	T	A	A	T	T	T	T	A	T	A	T	T	A
T	T	T	T	A	N	A	T	G	A	T	A	A	G	T	A	A	T	A	A	A	A	T	T	T	T	A	A	A	A	A	T	T	C	T	T	A	A	T	T	A	A	A	A	T	A	A	T	A	T
T	T	C	G	T	N	A	T	C	T	T	A	A	T	G	G	T	G	T	T	T	T	G	T	T	T	T	T	T	T	T	C	T	C	C	G	A	T	G	T	T	T	T	T	T	T	A	C	T	G
C	C	C	A	T	N	T	G	T	G	C	A	T	T	G	A	G	G	G	G	G	G	G	C	C	G	G	G	G	G	G	C	G	T	G	G	T	G	G	C	G	G	G	G	C	G	A	G	G	G
G	G	A	A	C	N	T	A	T	G	G	G	T	G	G	A	G	G	G	G	G	G	G	G	G	A	G	G	G	G	G	A	A	G	A	G	T	G	G	G	G	G	G	G	G	G	G	A	G	G
A	A	T	A	G	N	C	A	T	G	A	C	C	A	T	T	G	T	G	G	G	G	T	A	A	A	G	G	G	G	G	T	A	T	T	T	C	G	T	A	G	G	G	G	A	G	C	T	G	T
T	T	A	A	A	N	G	A	A	T	T	T	G	A	A	T	T	A	T	T	T	T	A	T	T	A	T	T	T	T	T	A	A	G	C	A	G	T	A	T	T	T	T	T	T	T	T	C	T	A
C	C	A	G	T	N	A	A	T	A	C	T	A	A	G	C	A	G	A	A	A	A	G	C	C	A	A	A	A	A	A	A	A	G	T	G	A	A	G	C	A	A	A	A	C	A	T	T	A	G
T	T	T	A	C	N	T	C	G	G	T	G	T	A	A	G	G	A	G	G	G	G	A	T	T	C	G	G	G	G	G	T	C	T	G	A	T	G	A	T	G	G	G	G	T	G	G	G	G	A
G	G	C	A	T	N	C	C	G	A	G	A	C	G	A	A	A	A	A	A	A	A	A	G	G	C	A	A	A	A	A	C	C	A	T	A	C	A	A	G	A	A	A	A	G	A	A	T	A	A
T	T	A	A	G	N	T	A	G	A	T	T	T	A	T	T	A	T	A	A	A	A	T	T	T	A	A	A	A	A	A	A	A	A	C	T	T	A	T	T	A	A	A	A	T	A	T	C	A	T
C	C	A	A	T	N	G	T	T	T	C	G	G	A	T	C	T	T	T	T	T	T	T	C	C	T	T	T	T	T	T	A	T	T	T	T	G	T	T	C	T	T	T	T	C	T	G	T	T	T
T	T	G	A	C	N	T	T	A	T	T	G	T	A	C	T	T	C	T	T	T	T	C	T	T	T	T	T	T	T	T	G	T	T	A	C	T	T	C	T	T	T	T	T	T	T	G	A	T	C
A	A	A	G	T	N	C	C	G	C	A	C	C	A	G	G	C	G	C	C	C	C	G	A	A	C	C	C	C	C	C	A	C	T	T	G	C	C	G	A	C	C	C	C	A	C	C	T	C	G
T	T	C	C	A	N	T	T	A	G	T	T	T	A	A	T	G	A	G	G	G	G	A	T	T	T	G	G	G	G	G	C	T	T	C	A	T	G	A	T	G	G	G	G	T	G	T	C	G	A
C	C	T	T	T	N	A	T	A	A	C	T	A	G	T	C	A	T	A	A	A	A	T	C	C	T	A	A	A	A	A	T	T	A	C	T	A	A	T	C	A	A	A	A	C	A	T	C	A	T
C	C	A	T	C	N	T	C	T	T	C	T	T	C	C	T	T	C	T	T	T	T	C	C	C	C	T	T	T	T	T	A	C	A	A	C	T	T	C	C	T	T	T	T	C	T	T	A	T	C
A	A	T	G	C	N	C	G	T	C	A	A	C	T	T	A	C	T	C	C	C	C	T	A	A	G	C	C	C	C	C	T	G	A	G	T	C	C	T	A	C	C	C	C	A	C	A	G	C	T
G	G	T	A	A	N	C	T	C	T	G	T	C	T	G	T	T	G	T	T	T	T	G	G	G	T	T	T	T	T	T	T	T	G	T	G	C	T	G	G	T	T	T	T	G	T	T	T	T	G
T	T	C	T	G	N	A	A	G	G	T	G	A	G	T	C	G	T	G	G	G	G	T	T	T	A	G	G	G	G	G	C	A	T	T	T	A	G	T	T	G	G	G	G	T	G	G	T	G	T
T	T	A	G	T	N	G	A	A	T	T	G	G	A	C	C	T	C	T	T	T	T	C	T	T	A	T	T	T	T	T	A	A	T	G	C	G	T	C	T	T	T	T	T	T	T	G	G	T	C
G	G	A	G	T	N	T	G	T	C	G	G	T	T	T	A	C	T	C	C	C	C	T	G	G	G	C	C	C	C	C	A	G	A	C	T	T	C	T	G	C	C	C	C	G	C	G	C	C	T
C	C	C	C	G	N	T	G	C	T	C	T	T	G	A	G	T	A	T	T	T	T	A	C	C	G	T	T	T	T	T	C	G	C	G	A	T	T	A	C	T	T	T	T	C	T	T	G	T	A
G	G	C	T	C	N	G	G	T	A	G	A	G	G	T	T	A	T	A	A	A	A	T	G	G	G	A	A	A	A	A	C	G	A	T	T	G	A	T	G	A	A	A	A	G	A	A	T	A	T
T	T	A	T	G	N	C	T	G	T	T	G	C	C	C	T	T	C	T	T	T	T	C	T	T	T	T	T	T	T	T	A	T	A	C	C	C	T	C	T	T	T	T	T	T	T	G	C	T	C
C	C	A	T	T	N	G	G	T	C	C	A	G	T	C	G	C	C	C	C	C	C	C	C	C	G	C	C	C	C	C	A	G	A	A	C	G	C	C	C	C	C	C	C	C	C	A	A	C	C
A	A	G	A	C	N	T	G	C	C	A	A	T	T	A	C	C	A	C	C	C	C	A	A	A	G	C	C	C	C	C	G	G	A	C	A	T	C	A	A	C	C	C	C	A	C	A	C	C	A
C	C	G	T	A	N	C	T	T	A	C	T	C	T	G	G	A	G	A	A	A	A	G	C	C	T	A	A	A	A	A	G	T	G	C	G	C	A	G	C	A	A	A	A	C	A	T	C	A	G
C	C	G	G	C	N	A	C	A	G	C	T	A	A	T	T	G	T	G	G	G	G	T	C	C	C	G	G	G	G	G	G	C	G	A	T	A	G	T	C	G	G	G	G	C	G	T	A	G	T
A	A	T	G	C	N	C	G	T	T	A	C	C	T	T	C	T	T	T	T	T	T	T	A	A	G	T	T	T	T	T	T	G	A	A	T	C	T	T	A	T	T	T	T	A	T	C	A	T	T
A	A	T	G	A	N	C	C	C	T	A	G	C	G	G	A	T	G	T	T	T	T	G	A	A	C	T	T	T	T	T	T	C	A	A	G	C	T	G	A	T	T	T	T	A	T	G	A	T	G
A	A	G	T	A	N	A	A	C	G	A	A	A	G	C	C	G	C	G	G	G	G	C	A	A	A	G	G	G	G	G	G	A	A	T	C	A	G	C	A	G	G	G	G	A	G	A	T	G	C
T	T	A	A	A	N	A	C	A	C	T	T	A	G	G	C	C	G	C	C	C	C	G	T	T	C	C	C	C	C	C	A	C	A	G	G	A	C	G	T	C	C	C	C	T	C	T	G	C	G
G	G	A	G	T	N	A	T	G	G	G	C	A	T	T	A	G	T	G	G	G	G	T	G	G	T	G	G	G	G	G	A	T	G	A	T	A	G	T	G	G	G	G	G	G	G	C	A	G	T
A	A	A	A	G	N	T	A	T	T	A	T	T	A	C	A	T	C	T	T	T	T	C	A	A	A	T	T	T	T	T	A	A	C	A	C	T	T	C	A	T	T	T	T	A	T	T	A	T	C
A	A	A	A	A	N	G	T	T	C	A	G	G	G	A	A	C	A	C	C	C	C	A	A	A	T	C	C	C	C	C	A	T	T	T	A	G	C	A	A	C	C	C	C	A	C	G	T	C	A
T	T	G	T	A	N	A	T	G	A	T	T	A	A	C	T	A	C	A	A	A	A	C	T	T	T	A	A	A	A	A	G	T	A	G	C	A	A	C	T	A	A	A	A	T	A	T	G	A	C
G	G	A	T	T	N	A	G	C	C	G	C	A	A	C	G	C	C	C	C	C	C	C	G	G	G	C	C	C	C	C	A	G	A	C	C	A	C	C	G	C	C	C	C	G	C	C	C	C	C
C	C	A	C	G	N	T	C	G	C	C	T	T	T	A	A	C	A	C	C	C	C	A	C	C	C	C	C	C	C	C	A	C	A	A	A	T	C	A	C	C	C	C	C	C	C	T	A	C	A
A	A	A	G	C	N	G	C	T	A	A	A	G	T	A	A	A	A	A	A	A	A	A	A	A	C	A	A	A	A	A	A	C	A	A	A	G	A	A	A	A	A	A	A	A	A	A	A	A	A
A	A	A	A	A	N	C	T	C	A	A	T	C	C	A	T	A	A	A	A	A	A	A	A	A	T	A	A	A	A	A	A	T	A	C	A	C	A	A	A	A	A	A	A	A	A	T	C	A	A
C	C	A	T	A	N	A	T	A	A	C	C	A	G	T	G	A	T	A	A	A	A	T	C	C	T	A	A	A	A	A	A	T	A	C	T	A	A	T	C	A	A	A	A	C	A	C	C	A	T
C	C	G	C	C	N	A	T	C	T	C	C	A	A	G	C	T	G	T	T	T	T	G	C	C	T	T	T	T	T	T	G	T	G	A	G	A	T	G	C	T	T	T	T	C	T	C	A	T	G
A	A	C	T	C	N	C	G	C	G	A	A	C	T	A	A	G	A	G	G	G	G	A	A	A	G	G	G	G	G	G	C	G	G	A	A	C	G	A	A	G	G	G	G	A	G	A	A	G	A
A	A	T	G	A	N	C	G	A	A	A	G	C	C	A	A	A	A	A	A	A	A	A	A	A	G	A	A	A	A	A	T	G	T	A	A	C	A	A	A	A	A	A	A	A	A	G	A	A	A
A	A	T	T	A	N	A	A	A	A	A	T	A	T	T	C	A	T	A	A	A	A	T	A	A	A	A	A	A	A	A	T	A	G	T	T	A	A	T	A	A	A	A	A	A	A	T	T	A	T
T	T	G	C	A	N	A	G	A	T	T	T	A	G	G	C	T	G	T	T	T	T	G	T	T	G	T	T	T	T	T	G	G	C	G	G	A	T	G	T	T	T	T	T	T	T	T	G	T	G
G	G	A	T	T	N	A	G	T	G	G	G	A	T	C	A	G	C	G	G	G	G	C	G	G	G	G	G	G	G	G	A	G	C	T	C	A	G	C	G	G	G	G	G	G	G	G	T	G	C
T	T	T	A	G	N	T	C	G	C	T	C	T	C	A	A	C	A	C	C	C	C	A	T	T	C	C	C	C	C	C	T	C	T	G	A	T	C	A	T	C	C	C	C	T	C	C	G	C	A
G	G	G	T	T	N	G	T	A	A	G	G	G	T	A	A	A	A	A	A	A	A	A	G	G	T	A	A	A	A	A	G	T	G	C	A	G	A	A	G	A	A	A	A	G	A	G	C	A	A
C	C	G	C	G	N	T	G	A	A	C	T	T	A	C	T	A	C	A	A	A	A	C	C	C	G	A	A	A	A	A	G	G	G	C	C	T	A	C	C	A	A	A	A	C	A	T	C	A	C
C	C	C	C	C	N	G	T	T	C	C	C	G	T	C	G	C	C	C	C	C	C	C	C	C	T	C	C	C	C	C	C	T	A	T	C	G	C	C	C	C	C	C	C	C	C	C	T	C	C
T	T	T	A	C	N	C	G	G	C	T	A	C	C	A	T	C	A	C	C	C	C	A	T	T	G	C	C	C	C	C	T	G	A	T	A	C	C	A	T	C	C	C	C	T	C	A	T	C	A
T	T	T	G	T	N	C	T	C	A	T	C	C	C	A	G	A	A	A	A	A	A	A	T	T	T	A	A	A	A	A	T	T	T	T	A	C	A	A	T	A	A	A	A	T	A	C	T	A	A
T	T	T	T	T	N	T	G	A	A	T	C	T	A	A	C	A	A	A	A	A	A	A	T	T	G	A	A	A	A	A	T	G	A	C	A	T	A	A	T	A	A	A	A	T	A	C	C	A	A
C	C	A	T	T	N	T	T	A	A	C	A	T	G	T	C	A	T	A	A	A	A	T	C	C	T	A	A	A	A	A	A	T	T	A	T	T	A	T	C	A	A	A	A	C	A	A	A	A	T
A	A	T	G	C	N	T	T	C	T	A	A	T	T	G	T	T	G	T	T	T	T	G	A	A	T	T	T	T	T	T	T	T	T	A	G	T	T	G	A	T	T	T	T	A	T	A	A	T	G
A	A	G	C	A	N	C	C	C	G	A	A	C	T	T	T	G	T	G	G	G	G	T	A	A	C	G	G	G	G	G	G	C	G	C	T	C	G	T	A	G	G	G	G	A	G	A	C	G	T
C	C	G	G	A	N	A	T	A	T	C	T	A	G	G	T	T	G	T	T	T	T	G	C	C	T	T	T	T	T	T	G	T	G	T	G	A	T	G	C	T	T	T	T	C	T	T	T	T	G
T	T	G	T	C	N	A	C	A	G	T	G	A	C	C	C	G	C	G	G	G	G	C	T	T	C	G	G	G	G	G	G	C	T	C	C	A	G	C	T	G	G	G	G	T	G	G	C	G	C
C	C	T	C	T	N	C	T	A	C	C	A	C	G	C	A	C	C	C	C	C	C	C	C	C	T	C	C	C	C	C	T	T	G	T	C	C	C	C	C	C	C	C	C	C	C	A	T	C	C
T	T	A	A	C	N	T	T	T	C	T	A	T	T	T	A	C	T	C	C	C	C	T	T	T	T	C	C	C	C	C	A	T	A	C	T	T	C	T	T	C	C	C	C	T	C	A	C	C	T
C	C	G	C	T	N	C	A	G	T	C	T	C	C	T	C	T	T	T	T	T	T	T	C	C	A	T	T	T	T	T	G	A	A	A	T	C	T	T	C	T	T	T	T	C	T	T	A	T	T
A	A	A	C	C	N	T	T	T	T	A	G	T	A	T	T	T	T	T	T	T	T	T	A	A	T	T	T	T	T	T	A	T	C	T	T	T	T	T	A	T	T	T	T	A	T	G	T	T	T
T	T	A	A	A	N	C	G	G	T	T	C	C	C	C	C	T	C	T	T	T	T	C	T	T	G	T	T	T	T	T	A	G	A	G	C	C	T	C	T	T	T	T	T	T	T	C	G	T	C
G	G	T	A	T	N	A	T	C	C	G	A	A	C	A	T	C	A	C	C	C	C	A	G	G	T	C	C	C	C	C	T	T	G	A	A	A	C	A	G	C	C	C	C	G	C	A	A	C	A
A	A	T	A	G	N	T	T	C	A	A	A	T	A	A	C	A	A	A	A	A	A	A	A	A	T	A	A	A	A	A	T	T	A	A	A	T	A	A	A	A	A	A	A	A	A	A	A	A	A
A	A	C	T	A	G	G	G	T	A	A	C	G	A	C	A	A	C	A	A	A	A	C	A	A	G	A	A	A	A	A	C	G	A	G	C	G	A	C	A	A	A	A	A	A	A	C	G	A	C
G	G	G	G	A	A	A	G	T	C	G	C	A	A	T	T	C	T	C	C	C	C	T	G	G	G	C	C	C	C	C	G	G	A	T	T	A	C	T	G	C	C	C	C	G	C	C	T	C	T
T	T	A	A	G	C	A	T	T	T	T	A	A	T	C	G	T	C	T	T	T	T	C	T	T	T	T	T	T	T	T	A	T	T	G	C	A	T	C	T	T	T	T	T	T	T	A	G	T	C
G	G	T	A	T	T	G	T	C	C	G	A	G	G	T	A	C	T	C	C	C	C	T	G	G	T	C	C	C	C	C	T	T	C	T	T	G	C	T	G	C	C	C	C	G	C	A	T	C	T
T	T	C	T	G	A	T	G	A	T	T	A	T	A	C	A	T	C	T	T	T	T	C	T	T	G	T	T	T	T	T	C	G	A	G	C	T	T	C	T	T	T	T	T	T	T	A	G	T	C
G	G	T	G	T	A	G	C	A	C	G	T	G	A	A	G	C	A	C	C	C	C	A	G	G	C	C	C	C	C	C	T	C	A	A	A	G	C	A	G	C	C	C	C	G	C	T	A	C	A
A	A	G	C	G	A	T	C	C	A	A	G	T	T	T	T	A	T	A	A	A	A	T	A	A	C	A	A	A	A	A	G	C	T	T	T	T	A	T	A	A	A	A	A	A	A	G	T	A	T
T	T	T	A	A	G	G	A	T	T	T	T	G	G	G	G	T	G	T	T	T	T	G	T	T	A	T	T	T	T	T	T	A	A	C	G	G	T	G	T	T	T	T	T	T	T	T	C	T	G
C	C	C	A	T	A	A	T	C	G	C	G	A	C	A	T	G	A	G	G	G	G	A	C	C	T	G	G	G	G	G	C	T	C	A	A	A	G	A	C	G	G	G	G	C	G	G	A	G	A
A	A	T	C	C	A	T	A	T	A	A	C	T	A	A	G	A	A	A	A	A	A	A	A	A	A	A	A	A	A	A	T	A	T	T	A	T	A	A	A	A	A	A	A	A	A	C	T	A	A
T	T	A	C	A	G	C	A	C	A	T	C	C	A	G	A	A	G	A	A	A	A	G	T	T	A	A	A	A	A	A	A	A	G	T	G	C	A	G	T	A	A	A	A	T	A	C	T	A	G
T	T	T	A	T	G	A	C	A	G	T	T	A	C	T	T	G	T	G	G	G	G	T	T	T	C	G	G	G	G	G	T	C	A	G	T	A	G	T	T	G	G	G	G	T	G	T	G	G	T
G	G	C	A	T	T	T	A	T	T	G	T	T	C	G	C	T	G	T	T	T	T	G	G	G	A	T	T	T	T	T	C	A	G	T	G	T	T	G	G	T	T	T	T	G	T	T	T	T	G
T	T	C	A	G	G	T	A	G	G	T	T	T	A	T	A	G	T	G	G	G	G	T	T	T	A	G	G	G	G	G	C	A	T	G	T	T	G	T	T	G	G	G	G	T	G	T	G	G	T
G	G	A	T	T	C	G	G	A	T	G	C	G	A	G	T	T	G	T	T	T	T	G	G	G	G	T	T	T	T	T	A	G	C	G	G	G	T	G	G	T	T	T	T	G	T	C	G	T	G
G	G	G	G	G	C	T	T	A	G	G	A	T	A	A	T	G	A	G	G	G	G	A	G	G	T	G	G	G	G	G	G	T	C	T	A	T	G	A	G	G	G	G	G	G	G	A	T	G	A
T	T	T	T	G	A	G	G	G	A	T	A	G	T	T	G	A	T	A	A	A	A	T	T	T	G	A	A	A	A	A	T	G	T	G	T	G	A	T	T	A	A	A	A	T	A	A	G	A	T
G	G	T	G	T	C	G	T	T	T	G	C	G	G	C	T	T	C	T	T	T	T	C	G	G	T	T	T	T	T	T	T	T	C	A	C	G	T	C	G	T	T	T	T	G	T	C	A	T	C
A	A	G	C	G	T	T	G	G	C	A	T	T	T	A	G	C	A	C	C	C	C	A	A	A	G	C	C	C	C	C	G	G	T	A	A	T	C	A	A	C	C	C	C	A	C	T	A	C	A
A	A	C	C	A	A	G	C	T	A	A	C	G	G	T	G	A	T	A	A	A	A	T	A	A	C	A	A	A	A	A	C	C	T	A	T	G	A	T	A	A	A	A	A	A	A	C	A	A	T
A	A	G	T	A	C	A	C	G	T	A	T	A	C	T	T	T	T	T	T	T	T	T	A	A	C	T	T	T	T	T	G	C	T	C	T	A	T	T	A	T	T	T	T	A	T	T	C	T	T
C	C	T	T	A	T	A	T	A	T	C	C	A	C	G	G	T	G	T	T	T	T	G	C	C	T	T	T	T	T	T	T	T	A	T	G	A	T	G	C	T	T	T	T	C	T	C	T	T	G
T	T	C	T	C	T	A	A	T	G	T	A	A	T	T	A	G	T	G	G	G	G	T	T	T	A	G	G	G	G	G	C	A	T	T	T	A	G	T	T	G	G	G	G	T	G	A	T	G	T
T	T	A	C	T	G	C	T	C	T	T	T	C	T	G	A	T	G	T	T	T	T	G	T	T	T	T	T	T	T	T	A	T	G	C	G	C	T	G	T	T	T	T	T	T	T	T	C	T	G
C	C	C	A	T	T	T	T	A	G	C	G	T	T	G	A	G	G	G	G	G	G	G	C	C	T	G	G	G	G	G	C	T	C	A	G	T	G	G	C	G	G	G	G	C	G	G	A	G	G
A	A	C	A	C	G	T	G	T	G	A	A	T	C	T	C	G	T	G	G	G	G	T	A	A	G	G	G	G	G	G	C	G	A	T	T	T	G	T	A	G	G	G	G	A	G	A	T	G	T
T	T	A	C	A	G	C	G	T	T	T	A	C	A	G	T	T	G	T	T	T	T	G	T	T	G	T	T	T	T	T	A	G	T	G	G	C	T	G	T	T	T	T	T	T	T	A	G	T	G
G	G	A	T	T	T	A	G	G	G	G	G	A	A	A	T	G	A	G	G	G	G	A	G	G	G	G	G	G	G	G	A	G	T	G	A	A	G	A	G	G	G	G	G	G	G	G	G	G	A
G	G	A	C	G	T	T	T	T	A	G	T	T	C	A	C	A	A	A	A	A	A	A	G	G	T	A	A	A	A	A	A	T	T	C	A	T	A	A	G	A	A	A	A	G	A	T	C	A	A
C	C	T	T	G	A	G	T	G	A	C	G	G	T	A	A	A	A	A	A	A	A	A	C	C	T	A	A	A	A	A	T	T	G	A	A	G	A	A	C	A	A	A	A	C	A	G	A	A	A
A	A	G	C	C	C	G	C	G	A	A	T	G	C	C	T	A	C	A	A	A	A	C	A	A	C	A	A	A	A	A	G	C	C	G	C	G	A	C	A	A	A	A	A	A	A	T	G	A	C
G	G	A	A	A	T	C	C	T	C	G	G	C	T	T	G	C	T	C	C	C	C	T	G	G	C	C	C	C	C	C	A	C	A	A	T	C	C	T	G	C	C	C	C	G	C	G	A	C	T
A	A	A	T	G	T	A	A	G	T	A	A	A	C	T	G	T	T	T	T	T	T	T	A	A	A	T	T	T	T	T	A	A	T	C	T	A	T	T	A	T	T	T	T	A	T	A	C	T	T
C	C	T	G	A	A	G	C	A	T	C	T	G	A	C	C	T	C	T	T	T	T	C	C	C	C	T	T	T	T	T	T	C	C	G	C	G	T	C	C	T	T	T	T	C	T	T	G	T	C
G	G	G	A	C	C	A	G	A	C	G	C	A	T	A	A	C	A	C	C	C	C	A	G	G	G	C	C	C	C	C	G	G	A	G	A	A	C	A	G	C	C	C	C	G	C	C	G	C	A
G	G	C	A	G	C	C	T	A	A	G	A	C	G	T	G	A	T	A	A	A	A	T	G	G	T	A	A	A	A	A	C	T	G	G	T	C	A	T	G	A	A	A	A	G	A	A	G	A	T
G	G	A	G	G	C	G	G	C	T	G	T	G	A	G	A	T	G	T	T	T	T	G	G	G	G	T	T	T	T	T	A	G	A	C	G	G	T	G	G	T	T	T	T	G	T	T	C	T	G
C	C	A	T	G	C	G	C	T	G	C	T	G	A	G	C	G	G	G	G	G	G	G	C	C	C	G	G	G	G	G	A	C	G	G	G	G	G	G	C	G	G	G	G	C	G	T	G	G	G
G	G	C	G	C	A	G	T	T	G	G	G	G	G	C	G	G	C	G	G	G	G	C	G	G	T	G	G	G	G	G	C	T	G	A	C	G	G	C	G	G	G	G	G	G	G	G	A	G	C
A	A	C	T	G	A	C	A	C	C	A	T	C	T	A	G	C	A	C	C	C	C	A	A	A	A	C	C	C	C	C	C	A	C	T	A	C	C	A	A	C	C	C	C	A	C	T	T	C	A
T	T	A	G	A	A	G	G	A	A	T	G	G	G	G	G	A	G	A	A	A	A	G	T	T	G	A	A	A	A	A	A	G	T	T	G	G	A	G	T	A	A	A	A	T	A	G	T	A	G
T	T	A	A	T	A	A	C	T	G	T	G	A	T	A	C	G	A	G	G	G	G	A	T	T	C	G	G	G	G	G	A	C	G	T	A	A	G	A	T	G	G	G	G	T	G	G	T	G	A
T	T	A	T	T	T	T	G	G	A	T	T	T	G	C	G	A	C	A	A	A	A	C	T	T	G	A	A	A	A	A	A	G	C	T	C	T	A	C	T	A	A	A	A	T	A	T	T	A	C
T	T	T	C	T	G	T	C	G	C	T	G	T	A	G	A	C	G	C	C	C	C	G	T	T	C	C	C	C	C	C	T	C	T	G	G	T	C	G	T	C	C	C	C	T	C	G	G	C	G
G	G	G	A	T	C	T	T	C	G	G	A	T	T	G	T	G	G	G	G	G	G	G	G	G	T	G	G	G	G	G	G	T	C	T	G	T	G	G	G	G	G	G	G	G	G	A	T	G	G
T	T	T	T	G	T	T	A	A	G	T	A	T	C	G	T	G	G	G	G	G	G	G	T	T	A	G	G	G	G	G	T	A	G	T	G	T	G	G	T	G	G	G	G	T	G	A	T	G	G
T	T	G	T	T	G	G	A	G	G	T	A	G	A	C	T	G	C	G	G	G	G	C	T	T	A	G	G	G	G	G	G	A	T	A	C	G	G	C	T	G	G	G	G	T	G	A	A	G	C
A	A	C	G	T	T	T	C	A	C	A	C	T	T	G	T	C	G	C	C	C	C	G	A	A	C	C	C	C	C	C	C	C	G	A	G	T	C	G	A	C	C	C	C	A	C	C	A	C	G
A	A	C	T	A	T	T	A	C	G	A	T	T	T	A	G	G	A	G	G	G	G	A	A	A	A	G	G	G	G	G	C	A	T	A	A	T	G	A	A	G	G	G	G	A	G	T	A	G	A
A	A	T	G	A	G	A	T	G	A	A	T	A	G	T	T	A	T	A	A	A	A	T	A	A	T	A	A	A	A	A	T	T	T	G	T	A	A	T	A	A	A	A	A	A	A	T	G	A	T
G	G	T	G	A	T	A	A	G	T	G	C	A	T	T	T	T	T	T	T	T	T	T	G	G	A	T	T	T	T	T	T	A	G	C	T	A	T	T	G	T	T	T	T	G	T	C	C	T	T
C	C	T	T	G	T	A	G	G	T	C	A	A	G	T	A	T	T	T	T	T	T	T	C	C	G	T	T	T	T	T	T	G	T	C	T	A	T	T	C	T	T	T	T	C	T	A	C	T	T
C	C	C	G	C	A	G	G	C	T	C	T	G	G	T	A	T	T	T	T	T	T	T	C	C	G	T	T	T	T	T	C	G	A	A	T	G	T	T	C	T	T	T	T	C	T	T	A	T	T
A	A	A	A	C	A	C	T	G	T	A	G	C	T	G	A	T	G	T	T	T	T	G	A	A	T	T	T	T	T	T	A	T	C	C	G	C	T	G	A	T	T	T	T	A	T	G	C	T	G
C	C	A	A	A	A	C	T	A	G	C	G	C	G	T	G	G	T	G	G	G	G	T	C	C	T	G	G	G	G	G	A	T	G	T	T	C	G	T	C	G	G	G	G	C	G	G	T	G	T
T	T	C	A	C	A	A	G	T	T	T	C	A	A	T	C	T	T	T	T	T	T	T	T	T	G	T	T	T	T	T	C	G	A	T	T	A	T	T	T	T	T	T	T	T	T	C	T	T	T
T	T	T	C	T	T	C	T	T	T	T	A	C	A	A	C	T	A	T	T	T	T	A	T	T	T	T	T	T	T	T	T	T	T	G	A	C	T	A	T	T	T	T	T	T	T	A	G	T	A
G	G	C	T	T	T	T	A	T	A	G	G	T	A	A	A	A	A	A	A	A	A	A	G	G	A	A	A	A	A	A	C	A	C	C	A	T	A	A	G	A	A	A	A	G	A	G	C	A	A
C	C	T	T	G	T	T	A	T	A	C	A	T	C	A	C	A	A	A	A	A	A	A	C	C	A	A	A	A	A	A	T	A	A	G	A	T	A	A	C	A	A	A	A	C	A	A	G	A	A
G	G	C	C	C	A	G	C	G	A	G	C	G	T	G	T	A	G	A	A	A	A	G	G	G	C	A	A	A	A	A	C	C	A	A	G	G	A	G	G	A	A	A	A	G	A	C	A	A	G
A	A	A	A	G	T	C	C	T	G	A	G	C	T	C	T	G	C	G	G	G	G	C	A	A	C	G	G	G	G	G	A	C	T	A	C	C	G	C	A	G	G	G	G	A	G	G	A	G	C
A	A	T	T	A	T	G	A	T	C	A	G	G	C	C	G	C	C	C	C	C	C	C	A	A	A	C	C	C	C	C	T	A	T	T	C	G	C	C	A	C	C	C	C	A	C	G	T	C	C
T	T	G	G	A	G	A	T	A	C	T	G	A	A	A	C	C	A	C	C	C	C	A	T	T	T	C	C	C	C	C	G	T	T	T	A	A	C	A	T	C	C	C	C	T	C	G	T	C	A
T	T	A	G	T	T	A	A	A	A	T	C	A	T	C	G	A	C	A	A	A	A	C	T	T	A	A	A	A	A	A	A	A	T	T	C	A	A	C	T	A	A	A	A	T	A	C	T	A	C
T	T	A	C	T	C	T	C	A	C	T	G	T	G	T	A	C	T	C	C	C	C	T	T	T	C	C	C	C	C	C	A	C	C	T	T	T	C	T	T	C	C	C	C	T	C	G	T	C	T
T	T	G	A	T	C	T	A	G	T	T	A	T	G	T	A	T	T	T	T	T	T	T	T	T	A	T	T	T	T	T	G	A	T	G	T	T	T	T	T	T	T	T	T	T	T	A	G	T	T
G	G	T	G	T	A	T	G	C	T	G	T	T	C	G	T	T	G	T	T	T	T	G	G	G	G	T	T	T	T	T	T	G	C	T	G	T	T	G	G	T	T	T	T	G	T	T	T	T	G
T	T	G	A	G	G	T	G	C	G	T	T	T	A	C	T	G	C	G	G	G	G	C	T	T	G	G	G	G	G	G	G	G	C	G	C	T	G	C	T	G	G	G	G	T	G	T	G	G	C
G	G	T	C	T	C	G	T	A	C	G	T	G	G	G	T	C	G	C	C	C	C	G	G	G	T	C	C	C	C	C	T	T	C	G	G	G	C	G	G	C	C	C	C	G	C	T	G	C	G
G	G	G	G	G	A	T	G	C	G	G	T	T	A	A	T	G	A	G	G	G	G	A	G	G	G	G	G	G	G	G	G	G	G	C	A	T	G	A	G	G	G	G	G	G	G	T	C	G	A
C	C	A	G	G	T	G	T	T	A	C	G	G	C	A	G	A	A	A	A	A	A	A	C	C	T	A	A	A	A	A	A	T	C	A	A	G	A	A	C	A	A	A	A	C	A	G	A	A	A
A	A	T	G	C	G	G	T	T	A	A	T	G	G	T	T	A	T	A	A	A	A	T	A	A	T	A	A	A	A	A	T	T	A	C	T	G	A	T	A	A	A	A	A	A	A	T	C	A	T
C	C	C	C	A	T	C	G	G	T	C	T	C	G	T	G	T	T	T	T	T	T	T	C	C	G	T	T	T	T	T	C	G	C	T	T	C	T	T	C	T	T	T	T	C	T	T	T	T	T
T	T	A	G	C	C	A	T	C	T	T	A	A	G	T	G	T	T	T	T	T	T	T	T	T	T	T	T	T	T	T	N	T	T	G	T	A	T	T	T	T	T	T	T	T	T	A	G	T	T
G	G	T	A	T	A	C	T	G	T	G	A	C	C	T	C	T	T	T	T	T	T	T	G	G	T	T	T	T	T	T	N	T	C	A	T	C	T	T	G	T	T	T	T	G	T	A	A	T	T
A	A	T	T	G	C	T	G	A	T	A	A	T	G	G	A	T	G	T	T	T	T	G	A	A	G	T	T	T	T	T	N	G	T	G	G	T	T	G	A	T	T	T	T	A	T	A	G	T	G
G	G	G	T	A	A	G	G	A	G	G	G	G	A	T	C	G	T	G	G	G	G	T	G	G	G	G	G	G	G	G	N	G	T	A	T	G	G	T	G	G	G	G	G	G	G	G	A	G	T
A	A	T	T	G	A	A	A	T	T	A	C	A	T	G	T	T	G	T	T	T	T	G	A	A	A	T	T	T	T	T	N	A	G	A	G	A	T	G	A	T	T	T	T	A	T	C	A	T	G
A	A	G	T	A	T	G	G	T	G	A	C	G	T	G	G	G	G	G	G	G	G	G	A	A	G	G	G	G	G	G	N	G	A	T	G	G	G	G	A	G	G	G	G	A	G	C	T	G	G
T	T	G	G	A	T	A	A	T	G	T	A	A	T	C	A	G	C	G	G	G	G	C	T	T	A	G	G	G	G	G	N	A	A	T	C	A	G	C	T	G	G	G	G	T	G	A	T	G	C
T	T	T	T	T	C	A	A	T	C	T	C	A	T	A	G	C	A	C	C	C	C	A	T	T	A	C	C	C	C	C	N	A	A	T	A	A	C	A	T	C	C	C	C	T	C	C	T	C	A
T	T	G	T	T	A	T	G	G	A	T	T	T	G	C	A	A	C	A	A	A	A	C	T	T	G	A	A	A	A	A	N	G	C	G	C	T	A	C	T	A	A	A	A	T	A	T	G	A	C
G	G	A	A	T	G	T	G	T	C	G	T	T	T	T	A	C	T	C	C	C	C	T	G	G	G	C	C	C	C	C	N	G	T	A	T	T	C	T	G	C	C	C	C	G	C	T	A	C	T
A	A	A	A	G	A	T	T	G	T	A	G	T	T	G	T	T	G	T	T	T	T	G	A	A	T	T	T	T	T	T	N	T	G	C	G	T	T	G	A	T	T	T	T	A	T	G	C	T	G
C	C	A	A	A	A	G	T	G	G	C	C	G	A	A	T	G	A	G	G	G	G	A	C	C	T	G	G	G	G	G	N	T	C	T	A	G	G	A	C	G	G	G	G	C	G	C	T	G	A
T	T	C	G	C	G	A	C	C	A	T	G	A	A	G	T	A	G	A	A	A	A	G	T	T	C	A	A	A	A	A	C	C	T	A	G	A	A	G	T	A	A	A	A	T	A	G	A	A	G
A	A	T	C	T	T	C	C	A	G	A	A	C	A	A	G	G	A	G	G	G	G	A	A	A	C	G	G	G	G	G	T	C	C	A	A	C	G	A	A	G	G	G	G	A	G	A	A	G	A
A	A	T	C	A	A	T	G	C	A	A	A	T	G	A	A	A	A	A	A	A	A	A	A	A	G	A	A	A	A	A	T	G	A	A	A	T	A	A	A	A	A	A	A	A	A	A	A	A	A
A	A	C	A	A	G	A	A	T	A	A	T	A	C	T	C	A	T	A	A	A	A	T	A	A	A	A	A	A	A	A	C	A	A	G	T	A	A	T	A	A	A	A	A	A	A	T	G	A	T
G	G	A	C	A	G	A	A	G	T	G	T	A	C	T	T	T	T	T	T	T	T	T	G	G	A	T	T	T	T	T	A	A	A	A	T	A	T	T	G	T	T	T	T	G	T	T	A	T	T
A	A	T	T	G	A	A	G	A	T	A	T	A	A	T	A	T	T	T	T	T	T	T	A	A	G	T	T	T	T	T	T	G	A	A	T	A	T	T	A	T	T	T	T	A	T	T	A	T	T
A	A	G	T	A	C	G	G	G	T	A	T	G	C	G	A	T	G	T	T	T	T	G	A	A	G	T	T	T	T	T	G	G	T	G	G	G	T	G	A	T	T	T	T	A	T	T	G	T	G
G	G	G	G	A	C	A	T	A	G	G	G	A	T	A	A	G	A	G	G	G	G	A	G	G	T	G	G	G	G	G	G	T	T	G	A	A	G	A	G	G	G	G	G	G	G	G	G	G	A
G	G	C	C	G	T	A	C	A	A	G	T	A	T	C	G	A	C	A	A	A	A	C	G	G	C	A	A	A	A	A	C	C	C	T	C	A	A	C	G	A	A	A	A	G	A	T	T	A	C
T	T	A	G	G	G	G	T	T	C	T	G	G	G	T	A	C	T	C	C	C	C	T	T	T	T	C	C	C	C	C	A	T	T	G	T	G	C	T	T	C	C	C	C	T	C	G	G	C	T
G	G	G	A	T	A	G	T	T	T	G	G	G	C	A	A	T	A	T	T	T	T	A	G	G	T	T	T	T	T	T	G	T	G	C	A	G	T	A	G	T	T	T	T	G	T	G	C	T	A
C	C	A	A	G	G	T	A	T	A	C	C	T	G	A	G	A	A	A	A	A	A	A	C	C	A	A	A	A	A	A	A	A	T	C	A	T	A	A	C	A	A	A	A	C	A	C	C	A	A
C	C	C	T	C	C	G	A	G	A	C	A	G	A	A	G	A	A	A	A	A	A	A	C	C	A	A	A	A	A	A	C	A	G	A	A	G	A	A	C	A	A	A	A	C	A	A	A	A	A
A	A	G	T	C	A	C	T	A	A	A	C	C	A	G	T	A	G	A	A	A	A	G	A	A	T	A	A	A	A	A	G	T	C	C	G	C	A	G	A	A	A	A	A	A	A	C	C	A	G
C	C	G	T	A	T	C	G	C	G	C	T	C	T	A	G	G	A	G	G	G	G	A	C	C	G	G	G	G	G	G	G	G	G	T	A	C	G	A	C	G	G	G	G	C	G	T	T	G	A
T	T	G	T	C	A	A	A	T	A	T	G	A	T	A	C	A	A	A	A	A	A	A	T	T	A	A	A	A	A	A	G	A	T	A	A	A	A	A	T	A	A	A	A	T	A	G	A	A	A
A	A	C	G	T	G	C	C	A	A	A	A	C	T	G	C	A	G	A	A	A	A	G	A	A	C	A	A	A	A	A	C	C	G	C	G	C	A	G	A	A	A	A	A	A	A	A	C	A	G
C	C	G	T	A	T	T	A	A	G	C	G	T	T	G	A	G	G	G	G	G	G	G	C	C	A	G	G	G	G	G	G	A	T	T	G	T	G	G	C	G	G	G	G	C	G	G	T	G	G
T	T	A	G	C	C	A	A	A	G	T	A	A	G	T	C	G	T	G	G	G	G	T	T	T	A	G	G	G	G	G	A	A	T	T	T	A	G	T	T	G	G	G	G	T	G	A	T	G	T
T	T	T	G	T	T	C	C	G	T	T	A	C	T	G	T	T	G	T	T	T	T	G	T	T	C	T	T	T	T	T	T	C	T	G	G	C	T	G	T	T	T	T	T	T	T	A	G	T	G
G	G	T	C	T	T	T	C	A	G	G	T	T	G	C	A	G	C	G	G	G	G	C	G	G	C	G	G	G	G	G	T	C	T	T	C	T	G	C	G	G	G	G	G	G	G	T	T	G	C
T	T	T	A	G	G	T	T	A	C	T	T	T	G	C	C	C	C	C	C	C	C	C	T	T	T	C	C	C	C	C	T	T	A	G	C	T	C	C	T	C	C	C	C	T	C	T	G	C	C
G	G	T	C	T	C	G	T	G	C	G	T	G	C	A	T	C	A	C	C	C	C	A	G	G	T	C	C	C	C	C	T	T	C	G	A	G	C	A	G	C	C	C	C	G	T	T	G	C	A
G	G	G	T	G	C	T	C	G	A	G	G	T	A	C	T	A	C	A	A	A	A	C	G	G	C	A	A	A	A	A	G	C	A	T	C	T	A	C	G	A	A	A	A	G	A	G	T	A	C
T	T	T	G	G	G	G	T	T	C	T	A	G	C	T	G	C	T	C	C	C	C	T	T	T	T	C	C	C	C	C	T	T	G	T	T	G	C	T	T	C	C	C	C	T	C	A	T	C	T
T	T	T	A	T	A	G	T	G	T	T	C	G	T	A	T	T	A	T	T	T	T	A	T	T	T	T	T	T	T	T	T	T	A	A	A	G	T	A	T	T	T	T	T	T	T	C	A	T	A
A	A	A	G	T	A	T	G	C	A	A	T	T	G	C	G	A	C	A	A	A	A	C	A	A	G	A	A	A	A	A	A	G	A	C	C	T	A	C	A	A	A	A	A	A	A	T	C	A	C
C	C	A	A	A	T	T	A	C	C	C	A	T	A	T	G	C	T	C	C	C	C	T	C	C	A	C	C	C	C	C	A	A	G	T	T	T	C	T	C	C	C	C	C	C	C	A	T	C	T
T	T	A	A	C	A	A	A	A	T	T	A	A	G	T	T	T	T	T	T	T	T	T	T	T	A	T	T	T	T	T	A	A	G	T	T	A	T	T	T	T	T	T	T	T	T	A	T	T	T
T	T	G	T	T	C	C	A	C	T	T	A	C	A	G	T	T	G	T	T	T	T	G	T	T	A	T	T	T	T	T	G	A	C	A	G	C	T	G	T	T	T	T	T	T	T	A	A	T	G
A	A	C	T	T	C	T	T	T	G	A	G	T	A	T	A	G	T	G	G	G	G	T	A	A	T	G	G	G	G	G	C	T	C	C	T	T	G	T	A	G	G	G	G	A	G	G	C	G	T
C	C	C	T	A	A	T	A	A	T	C	A	T	T	G	C	T	G	T	T	T	T	G	C	C	N	T	T	T	T	T	C	A	G	C	G	T	T	G	C	T	T	T	T	C	T	A	C	T	G
C	C	A	G	C	T	A	C	C	G	C	A	A	T	G	T	G	G	G	G	G	G	G	C	C	N	G	G	G	G	G	A	C	C	C	G	A	G	G	C	G	G	G	G	C	G	A	C	G	G
C	C	C	A	C	A	C	T	T	G	C	G	C	T	T	T	G	T	G	G	G	G	T	C	C	N	G	G	G	G	G	C	T	T	C	T	C	G	T	C	G	G	G	G	C	G	G	C	G	T
C	C	T	C	C	A	C	C	T	T	C	G	C	G	T	A	T	T	T	T	T	T	T	C	C	N	T	T	T	T	T	T	C	A	A	T	C	T	T	C	T	T	T	T	C	T	G	A	T	T
A	A	T	T	C	T	C	C	G	T	A	T	C	A	A	C	T	A	T	T	T	T	A	A	A	N	T	T	T	T	T	T	C	T	A	A	C	T	A	A	T	T	T	T	A	T	T	A	T	A
A	A	G	A	A	G	C	A	T	A	A	G	C	C	C	C	A	C	A	A	A	A	C	A	A	N	A	A	A	A	A	G	A	A	A	C	C	A	C	A	A	A	A	A	A	A	G	A	A	C
A	A	C	A	A	A	A	A	G	C	A	C	A	T	T	C	C	T	C	C	C	C	T	A	A	N	C	C	C	C	C	C	A	A	A	T	A	C	T	A	C	C	C	C	A	C	C	A	C	T
A	A	G	A	A	A	A	A	G	T	A	C	A	A	T	C	T	T	T	T	T	T	T	A	A	N	T	T	T	T	T	G	A	C	T	T	A	T	T	A	T	T	T	T	A	T	C	T	T	T
T	T	A	G	A	T	A	A	T	T	T	A	A	A	A	A	T	A	T	T	T	T	A	T	T	N	T	T	T	T	T	A	A	A	G	A	A	T	A	T	T	T	T	T	T	T	A	G	T	A
G	G	A	A	T	C	A	A	T	A	G	C	A	A	C	A	A	C	A	A	A	A	C	G	G	N	A	A	A	A	A	A	A	A	C	C	A	A	C	G	A	A	A	A	G	A	C	C	A	C
C	C	T	A	G	T	T	G	A	C	C	T	T	G	C	A	C	C	C	C	C	C	C	C	C	N	C	C	C	C	C	T	G	T	T	C	T	C	C	C	C	C	C	C	C	C	T	T	C	C
T	T	T	G	C	G	G	A	C	C	T	A	G	A	C	A	C	C	C	C	C	C	C	T	T	N	C	C	C	C	C	T	A	A	G	C	G	C	C	T	C	C	C	C	T	C	A	G	C	C
G	G	T	G	T	G	C	G	T	C	G	C	C	A	C	T	C	C	C	C	C	C	C	G	G	N	C	C	C	C	C	T	G	C	T	C	C	C	C	G	C	C	C	C	G	C	C	T	C	C
T	T	T	T	G	C	T	A	T	C	T	T	T	G	A	G	C	A	C	C	C	C	A	T	T	N	C	C	C	C	C	T	A	T	T	A	T	C	A	T	C	C	C	C	T	C	T	T	C	A
T	T	G	G	T	T	G	A	A	A	T	T	G	G	A	C	A	A	A	A	A	A	A	T	T	N	A	A	A	A	A	G	A	A	G	A	G	A	A	T	A	A	A	A	T	A	T	G	A	A
G	G	T	C	T	T	T	A	C	A	G	G	T	T	A	T	A	A	A	A	A	A	A	G	G	N	A	A	A	A	A	T	A	G	T	A	T	A	A	G	A	A	A	A	G	A	G	T	A	A
T	T	G	C	G	G	T	G	C	A	T	T	T	G	A	G	A	A	A	A	A	A	A	T	T	N	A	A	A	A	A	G	G	A	T	A	T	A	A	T	A	A	A	A	T	A	T	T	A	A
T	T	G	A	T	A	G	T	C	A	T	G	G	C	T	T	A	T	A	A	A	A	T	T	T	N	A	A	A	A	A	G	T	T	A	T	G	A	T	T	A	A	A	A	T	A	G	A	A	T
A	A	C	C	T	A	T	C	C	T	A	G	T	C	G	T	T	G	T	T	T	T	G	A	A	N	T	T	T	T	T	C	C	G	A	G	T	T	G	A	T	T	T	T	A	T	G	A	T	G
A	A	A	T	A	A	T	A	A	G	A	T	T	A	C	G	G	C	G	G	G	G	C	A	A	N	G	G	G	G	G	A	A	G	A	C	T	G	C	A	G	G	G	G	A	G	T	A	G	C
A	A	C	A	A	A	A	A	A	C	A	T	A	C	T	T	C	T	C	C	C	C	T	A	A	N	C	C	C	C	C	C	A	A	A	T	A	C	T	A	C	C	C	C	A	C	T	A	C	T
A	A	T	C	A	C	A	C	A	T	A	A	A	T	G	T	T	G	T	T	T	T	G	A	A	N	T	T	T	T	T	T	C	A	T	G	A	T	G	A	T	T	T	T	A	T	A	T	T	G
T	T	G	T	A	C	A	A	A	G	T	C	A	A	T	A	G	T	G	G	G	G	T	T	T	N	G	G	G	G	G	G	A	T	T	T	A	G	T	T	G	G	G	G	T	G	C	T	G	T
T	T	A	T	T	A	A	T	T	T	T	T	A	C	T	A	T	T	T	T	T	T	T	T	T	N	T	T	T	T	T	A	T	T	T	T	A	T	T	T	T	T	T	T	T	T	T	T	T	T
T	T	G	G	T	T	T	C	G	T	T	T	T	T	G	A	T	G	T	T	T	T	G	T	T	N	T	T	T	T	T	G	C	T	A	G	T	T	G	T	T	T	T	T	T	T	T	A	T	G
A	A	A	T	T	T	T	A	C	G	A	A	T	T	T	A	G	T	G	G	G	G	T	A	A	N	G	G	G	G	G	A	A	C	T	T	T	G	T	A	G	G	G	G	A	G	A	T	G	T
T	T	A	G	A	C	T	A	T	T	T	C	T	G	T	T	T	T	T	T	T	T	T	T	T	N	T	T	T	T	T	A	A	A	T	T	T	T	T	T	T	T	T	T	T	T	C	T	T	T
T	T	T	G	T	T	A	T	G	T	T	C	A	T	A	T	T	A	T	T	T	T	A	T	T	N	T	T	T	T	T	T	T	C	G	A	A	T	A	T	T	T	T	T	T	T	C	G	T	A
G	G	T	T	T	T	T	A	T	A	G	C	T	G	A	T	A	A	A	A	A	A	A	G	G	N	A	A	A	A	A	T	A	A	T	A	T	A	A	G	A	A	A	A	G	A	C	T	A	A
T	T	T	T	G	C	T	T	T	A	T	C	T	G	A	A	A	A	A	A	A	A	A	T	T	N	A	A	A	A	A	T	T	G	C	A	T	A	A	T	A	A	A	A	T	A	C	C	A	A
C	C	G	A	T	G	G	T	G	A	C	A	G	T	A	T	A	A	A	A	A	A	A	C	C	N	A	A	A	A	A	G	T	T	C	A	G	A	A	C	A	A	A	A	C	A	A	C	A	A
C	C	A	C	C	T	T	G	T	A	C	A	T	T	T	T	A	T	A	A	A	A	T	C	C	N	A	A	A	A	A	A	G	A	A	T	T	A	T	C	A	A	A	A	C	A	A	A	A	T
A	A	C	T	C	A	C	T	T	T	A	A	C	A	T	G	T	T	T	T	T	T	T	A	A	N	T	T	T	T	T	C	T	T	G	T	C	T	T	A	T	T	T	T	A	T	A	G	T	T
G	G	T	T	A	A	C	T	A	T	G	A	C	C	T	T	T	T	T	T	T	T	T	G	G	N	T	T	T	T	T	T	T	T	C	T	C	T	T	G	T	T	T	T	G	T	A	C	T	T
C	C	A	A	G	G	A	G	A	T	C	T	A	T	A	C	T	A	T	T	T	T	A	C	C	N	T	T	T	T	T	A	G	C	A	A	A	T	A	C	T	T	T	T	C	T	T	A	T	A
A	A	A	C	C	G	G	G	A	A	A	G	G	T	T	C	A	T	A	A	A	A	T	A	A	N	A	A	A	A	A	A	G	A	T	T	G	A	T	A	A	A	A	A	A	A	G	T	A	T
T	T	A	C	A	G	C	T	A	T	T	C	C	A	T	A	T	T	T	T	T	T	T	T	T	N	T	T	T	T	T	A	T	C	G	T	C	T	T	T	T	T	T	T	T	T	C	G	T	T
G	G	G	C	T	T	A	G	T	T	G	T	A	C	G	G	T	G	T	T	T	T	G	G	G	N	T	T	T	T	T	G	G	T	T	G	A	T	G	G	T	T	T	T	G	T	T	T	T	G
T	T	A	C	G	G	T	A	T	G	T	G	T	C	T	C	G	T	G	G	G	G	T	T	T	N	G	G	G	G	G	A	A	G	C	T	T	G	T	T	G	G	G	G	T	G	G	C	G	T
C	C	A	A	T	G	G	C	T	T	C	T	G	C	C	A	T	C	T	T	T	T	C	C	C	N	T	T	T	T	T	A	C	A	A	C	G	T	C	C	T	T	T	T	C	T	T	A	T	C
A	A	G	A	C	T	T	T	A	C	A	T	T	C	C	T	C	C	C	C	C	C	C	A	A	N	C	C	C	C	C	G	T	G	C	C	T	C	C	A	C	C	C	C	A	C	T	C	C	C
C	C	G	A	A	C	C	T	T	C	C	G	C	A	A	G	C	A	C	C	C	C	A	C	C	N	C	C	C	C	C	G	T	A	A	A	C	C	A	C	C	C	C	C	C	C	G	A	C	A
A	A	T	A	C	G	A	T	T	A	A	T	A	A	G	T	A	G	A	A	A	A	G	A	A	N	A	A	A	A	A	T	T	C	A	G	A	A	G	A	A	A	A	A	A	A	T	A	A	G
A	A	G	T	A	C	C	A	G	G	A	T	C	A	C	C	G	C	G	G	G	G	C	A	A	N	G	G	G	G	G	G	A	T	T	C	C	G	C	A	G	G	G	G	A	G	T	T	G	C
T	T	C	G	A	A	A	A	T	C	T	A	A	A	A	A	C	A	C	C	C	C	A	T	T	N	C	C	C	C	C	C	A	C	T	A	A	C	A	T	C	C	C	C	T	C	A	T	C	A
T	T	C	C	T	C	A	A	C	A	T	A	A	T	T	C	A	T	A	A	A	A	T	T	T	N	A	A	A	A	A	N	A	A	C	T	A	A	T	T	A	A	A	A	T	A	A	C	A	T
C	C	A	T	T	T	T	C	C	T	C	A	T	G	G	A	T	G	T	T	T	T	G	C	C	N	T	T	T	T	T	A	C	T	A	G	T	T	G	C	T	T	T	T	C	T	A	A	T	G
A	A	C	G	C	A	T	T	A	G	A	A	T	C	T	A	G	T	G	G	G	G	T	A	A	N	G	G	G	G	G	C	T	T	G	T	T	G	T	A	G	G	G	G	A	G	A	G	G	T
G	G	T	T	A	T	C	T	G	T	G	T	C	T	C	T	T	C	T	T	T	T	C	G	G	N	T	T	T	T	T	T	T	G	A	C	C	T	C	G	T	T	T	T	G	T	T	A	T	C
A	A	A	T	G	T	A	A	C	C	A	T	A	G	A	T	C	A	C	C	C	C	A	A	A	N	C	C	C	C	C	A	A	A	A	A	A	C	A	A	C	C	C	C	A	C	T	A	C	A
A	A	C	G	A	G	G	A	A	A	A	T	G	T	C	C	A	C	A	A	A	A	C	A	A	N	A	A	A	A	A	C	A	T	G	C	G	A	C	A	A	A	A	A	A	A	T	G	A	C
G	G	T	T	A	C	A	T	T	C	G	A	A	T	A	A	C	A	C	C	C	C	A	G	G	N	C	C	C	C	C	T	T	G	T	A	A	C	A	G	C	C	C	C	G	C	A	T	C	A
T	T	T	T	G	C	A	G	G	A	T	T	A	G	A	G	A	A	A	A	A	A	A	T	T	N	A	A	A	A	A	T	G	C	A	A	A	A	A	T	A	A	A	A	T	A	T	A	A	A
A	A	G	A	T	T	G	A	T	A	A	T	G	T	T	A	A	T	A	A	A	A	T	A	A	N	A	A	A	A	A	G	A	T	G	T	G	A	T	A	A	A	A	A	A	A	T	G	A	T
G	G	T	A	A	T	T	A	C	T	G	G	T	T	T	A	T	T	T	T	T	T	T	G	G	N	T	T	T	T	T	T	A	A	G	T	T	T	T	G	T	T	T	T	G	T	G	G	T	T
G	G	G	A	G	T	A	G	A	T	G	T	A	A	C	G	T	C	T	T	T	T	C	G	G	N	T	T	T	T	T	G	G	T	A	C	A	T	C	G	T	T	T	T	G	T	T	A	T	C
A	A	G	A	G	G	G	A	C	C	A	C	G	A	A	T	C	A	C	C	C	C	A	A	A	N	C	C	C	C	C	G	A	G	C	A	G	C	A	A	C	C	C	C	A	C	C	C	C	A
C	C	T	T	A	G	G	G	A	A	C	C	G	A	G	A	A	G	A	A	A	A	G	C	C	N	A	A	A	A	A	T	G	A	C	G	G	A	G	C	A	A	A	A	C	A	C	C	A	G
C	C	T	T	C	A	A	A	A	G	C	A	A	A	A	G	G	A	G	G	G	G	A	C	C	N	G	G	G	G	G	T	A	T	T	A	A	G	A	C	G	G	G	G	C	G	A	T	G	A
T	T	A	T	C	G	C	T	T	A	T	G	C	T	A	G	A	A	A	A	A	A	A	T	T	N	A	A	A	A	A	A	T	G	G	A	C	A	A	T	A	A	A	A	T	A	G	G	A	A
G	G	C	A	T	G	C	C	T	A	G	C	C	T	G	A	A	G	A	A	A	A	G	G	G	N	A	A	A	A	A	C	C	T	A	G	C	A	G	G	A	A	A	A	G	A	C	A	A	G
A	A	T	T	G	C	T	G	C	G	A	A	T	T	T	C	G	T	G	G	G	G	T	A	A	N	G	G	G	G	G	T	G	T	G	T	T	G	T	A	G	G	G	G	A	G	A	G	G	T
G	G	T	T	A	T	G	C	A	T	G	T	G	A	A	C	T	A	T	T	T	T	A	G	G	N	T	T	T	T	T	T	C	C	C	A	G	T	A	G	T	T	T	T	G	T	T	C	T	A
C	C	A	G	G	G	A	C	G	A	C	G	A	T	G	T	A	G	A	A	A	A	G	C	C	N	A	A	A	A	A	A	C	A	A	G	A	A	G	C	A	A	A	A	C	A	G	A	A	G
A	A	C	T	C	T	G	A	A	G	A	T	G	T	G	G	G	G	G	G	G	G	G	A	A	N	G	G	G	G	G	C	A	C	T	G	G	G	G	A	G	G	G	G	A	G	T	T	G	G
T	T	C	C	A	G	C	T	A	G	T	C	C	G	A	A	G	A	G	G	G	G	A	T	T	N	G	G	G	G	G	C	T	A	A	A	C	G	A	T	G	G	G	G	T	G	C	A	G	A
A	A	C	C	T	T	A	T	G	A	A	A	A	T	C	G	A	C	A	A	A	A	C	A	A	N	A	A	A	A	A	C	T	T	G	C	A	A	C	A	A	A	A	A	A	A	A	G	A	C
G	G	C	A	A	G	T	A	T	C	G	C	T	C	C	C	C	C	C	C	C	C	C	G	G	N	C	C	C	C	C	C	A	C	T	C	T	C	C	G	C	C	C	C	G	C	C	T	C	C
T	T	A	G	G	T	A	T	A	C	T	A	A	C	T	A	C	T	C	C	C	C	T	T	T	N	C	C	C	C	C	A	T	T	C	T	A	C	T	T	C	C	C	C	T	C	A	C	C	T
C	C	A	C	T	T	G	T	G	T	C	A	G	A	G	T	T	G	T	T	T	T	G	C	C	N	T	T	T	T	T	A	T	G	T	G	G	T	G	C	T	T	T	T	C	T	A	T	T	G
T	T	A	A	C	C	T	T	G	G	T	T	T	G	A	A	G	A	G	G	G	G	A	T	T	N	G	G	G	G	G	A	T	A	T	A	T	G	A	T	G	G	G	G	T	G	T	T	G	A
T	T	A	T	T	T	C	T	A	A	T	T	C	C	G	G	A	G	A	A	A	A	G	T	T	N	A	A	A	A	A	A	T	T	G	G	C	A	G	T	A	A	A	A	T	A	T	G	A	G
G	G	T	G	T	C	T	G	C	G	G	C	T	A	C	T	G	C	G	G	G	G	C	G	G	N	G	G	G	G	G	T	G	T	C	C	T	G	C	G	G	G	G	G	G	G	C	C	G	C
C	C	G	T	G	T	T	G	C	C	C	A	T	T	A	C	C	A	C	C	C	C	A	C	C	N	C	C	C	C	C	G	G	T	C	A	T	C	A	C	C	C	C	C	C	C	A	C	C	A
C	C	C	C	C	T	G	C	T	A	C	G	G	G	T	T	A	T	A	A	A	A	T	C	C	N	A	A	A	A	A	C	C	G	G	T	G	A	T	C	A	A	A	A	C	A	G	G	A	T
G	G	T	A	C	A	C	A	G	T	G	A	C	T	A	T	T	A	T	T	T	T	A	G	G	N	T	T	T	T	T	T	A	G	A	A	C	T	A	G	T	T	T	T	G	T	A	A	T	A
A	A	G	C	G	T	C	T	A	A	A	A	C	C	G	G	A	G	A	A	A	A	G	A	A	N	A	A	A	A	A	G	T	C	A	G	C	A	G	A	A	A	A	A	A	A	A	A	A	G
A	A	T	A	A	G	G	C	G	G	A	G	G	A	T	C	G	T	G	G	G	G	T	A	A	N	G	G	G	G	G	T	C	T	T	T	G	G	T	A	G	G	G	G	A	G	G	T	G	T
T	T	T	A	A	T	A	T	C	T	T	T	A	C	C	C	T	C	T	T	T	T	C	T	T	N	T	T	T	T	T	T	T	A	A	C	A	T	C	T	T	T	T	T	T	T	T	A	T	C
A	A	G	T	T	T	A	T	A	C	A	A	A	A	T	G	C	T	C	C	C	C	T	A	A	N	C	C	C	C	C	G	T	C	C	T	A	C	T	A	C	C	C	C	A	C	A	C	C	T
C	C	T	T	A	G	T	T	T	T	C	G	T	A	T	A	T	T	T	T	T	T	T	C	C	N	T	T	T	T	T	T	T	T	C	T	T	T	T	C	T	T	T	T	C	T	G	C	T	T
C	C	T	C	C	G	A	T	A	T	C	G	A	T	G	A	T	G	T	T	T	T	G	C	C	N	T	T	T	T	T	T	T	A	A	G	A	T	G	C	T	T	T	T	C	T	G	A	T	G
A	A	A	A	C	T	C	T	G	G	A	A	C	T	C	T	G	C	G	G	G	G	C	A	A	N	G	G	G	G	G	A	T	A	T	C	C	G	C	A	G	G	G	G	A	G	A	T	G	C
T	T	A	G	A	T	C	C	T	C	T	C	C	C	C	A	C	C	C	C	C	C	C	T	T	N	C	C	C	C	C	A	C	C	A	C	C	C	C	T	C	C	C	C	T	C	C	A	C	C
A	A	A	A	T	G	A	T	C	C	A	C	A	A	G	C	C	G	C	C	C	C	G	A	A	N	C	C	C	C	C	A	T	A	A	G	A	C	G	A	C	C	C	C	A	C	C	A	C	G
A	A	A	A	A	C	T	G	T	G	A	T	T	G	A	C	G	A	G	G	G	G	A	A	A	N	G	G	G	G	G	A	G	A	T	A	T	G	A	A	G	G	G	G	A	G	T	T	G	A
T	T	T	G	A	C	A	C	T	A	T	G	A	A	A	A	A	A	A	A	A	A	A	T	T	N	A	A	A	A	A	T	C	T	G	A	A	A	A	T	A	A	A	A	T	A	G	G	A	A
G	G	T	T	T	A	A	T	G	A	G	A	A	A	T	T	A	T	A	A	A	A	T	G	G	N	A	A	A	A	A	T	T	C	A	T	A	A	T	G	A	A	A	A	G	A	A	A	A	T
A	A	T	A	G	T	T	T	C	T	A	G	T	G	A	A	T	A	T	T	T	T	A	A	A	N	T	T	T	T	T	T	T	T	A	A	T	T	A	A	T	T	T	T	A	T	G	A	T	A
A	A	A	G	A	A	G	C	C	A	A	C	G	T	C	A	A	C	A	A	A	A	C	A	A	N	A	A	A	A	A	A	C	A	T	C	G	A	C	A	A	A	A	A	A	A	C	T	A	C
T	T	T	G	A	A	A	C	G	C	T	A	A	A	C	T	C	C	C	C	C	C	C	T	T	N	C	C	C	C	C	T	C	G	C	C	A	C	C	T	C	C	C	C	T	T	A	C	C	C
C	C	T	A	T	C	A	A	A	C	C	T	A	G	A	G	C	A	C	C	C	C	A	C	C	N	C	C	C	C	C	T	A	T	T	A	A	C	A	C	C	C	C	C	C	C	T	T	C	A
T	T	G	C	C	A	T	C	A	A	T	A	T	G	T	A	A	T	A	A	A	A	T	T	T	N	A	A	A	A	A	G	C	T	G	T	T	A	T	T	A	A	A	A	T	A	A	G	A	T
G	G	T	C	T	A	C	A	T	T	G	G	C	A	A	A	T	A	T	T	T	T	A	G	G	N	T	T	T	T	T	T	A	G	G	A	C	T	A	G	T	T	T	T	G	T	G	G	T	A
G	G	C	T	G	G	T	A	A	A	G	T	T	C	A	T	A	A	A	A	A	A	A	G	G	N	A	A	A	A	A	C	A	T	C	A	T	A	A	G	A	A	A	A	G	A	T	C	A	A
C	C	C	G	G	T	G	G	C	A	C	C	G	C	T	C	A	T	A	A	A	A	T	C	C	N	A	A	A	A	A	C	G	A	T	T	G	A	T	C	A	A	A	A	C	A	C	T	A	T
T	T	A	A	C	G	G	T	C	T	T	T	G	T	G	T	T	G	T	T	T	T	G	T	T	N	T	T	T	T	T	A	T	A	T	G	G	T	G	T	T	T	T	T	T	T	T	T	T	G
T	T	G	G	T	T	C	G	A	G	T	T	C	G	A	G	G	A	G	G	G	G	A	T	T	N	G	G	G	G	G	G	G	T	G	A	C	G	A	T	G	G	G	G	T	G	T	G	G	A
G	G	C	C	T	G	T	C	T	A	G	G	T	A	A	G	A	A	A	A	A	A	A	G	G	N	A	A	A	A	A	C	C	G	A	A	T	A	A	G	A	A	A	A	G	A	G	A	A	A
A	A	A	A	G	C	T	T	A	A	A	C	T	G	T	C	A	T	A	A	A	A	T	A	A	N	A	A	A	A	A	A	T	G	A	T	T	A	T	A	A	A	A	A	A	A	C	A	A	T
A	A	T	T	A	C	G	T	A	T	A	C	G	C	C	T	T	C	T	T	T	T	C	A	A	N	T	T	T	T	T	T	T	C	A	C	G	T	C	A	T	T	T	T	A	T	C	A	T	C
A	A	G	A	A	T	A	T	T	C	A	G	A	A	T	T	C	T	C	C	C	C	T	A	A	N	C	C	C	C	C	G	T	C	A	T	A	C	T	A	C	C	C	C	A	C	G	A	C	T
A	A	T	G	A	A	A	T	G	T	A	A	A	T	G	G	T	G	T	T	T	T	G	A	A	N	T	T	T	T	T	T	T	T	C	G	A	T	G	A	T	T	T	T	A	T	A	C	T	G
C	C	C	T	A	T	A	G	A	G	C	A	A	A	G	A	G	G	G	G	G	G	G	C	C	N	G	G	G	G	G	C	G	A	C	G	A	G	G	C	G	G	G	G	C	G	A	C	G	G
C	C	A	C	C	T	A	T	A	G	C	T	A	G	C	A	G	C	G	G	G	G	C	C	C	N	G	G	G	G	G	A	T	C	A	C	A	G	C	C	G	G	G	G	C	G	T	A	G	C
A	A	C	T	C	G	C	G	T	C	A	A	C	T	T	A	C	T	C	C	C	C	T	A	A	N	C	C	C	C	C	C	G	A	T	T	C	C	T	A	C	C	C	C	A	C	A	T	C	T
T	T	A	T	A	G	C	G	C	T	T	C	C	C	T	A	T	T	T	T	T	T	T	T	T	N	T	T	T	T	T	A	G	T	T	T	C	T	T	T	T	T	T	T	T	T	C	T	T	T
T	T	A	G	T	G	A	A	T	T	T	C	A	T	G	C	T	G	T	T	T	T	G	T	T	N	T	T	T	T	T	A	A	T	C	G	A	T	G	T	T	T	T	T	T	T	C	C	T	G
C	C	T	C	T	T	T	A	G	G	C	A	T	T	A	C	G	A	G	G	G	G	A	C	C	N	G	G	G	G	G	T	A	A	T	A	T	G	A	C	G	G	G	G	C	G	A	T	G	A
T	T	T	C	C	T	T	A	G	A	T	T	T	G	A	A	A	A	A	A	A	A	A	T	T	N	A	A	A	A	A	T	A	C	T	A	T	A	A	T	A	A	A	A	T	A	T	T	A	A
T	T	C	G	T	C	C	C	C	A	T	A	C	C	A	T	A	A	A	A	A	A	A	T	T	N	A	A	A	A	A	C	C	A	C	A	C	A	A	T	A	A	A	A	T	A	A	C	A	A
C	C	A	A	T	C	T	T	T	A	C	A	T	C	A	T	A	A	A	A	A	A	A	C	C	N	A	A	A	A	A	A	T	G	G	A	T	A	A	C	A	A	A	A	C	A	A	G	A	A
G	G	G	A	C	A	T	G	T	A	G	T	T	G	C	C	A	C	A	A	A	A	C	G	G	N	A	A	A	A	A	G	G	G	T	C	T	A	C	G	A	A	A	A	G	A	T	T	A	C
T	T	A	T	G	C	C	T	G	C	T	G	C	A	C	T	C	C	C	C	C	C	C	T	T	N	C	C	C	C	C	A	T	T	A	C	C	C	C	T	C	C	C	C	T	C	G	A	C	C
A	A	A	A	T	G	G	G	A	C	A	A	G	A	A	T	C	A	C	C	C	C	A	A	A	N	C	C	C	C	C	A	G	G	A	A	G	C	A	A	C	C	C	C	A	C	A	A	C	A
A	A	G	C	A	T	T	A	A	A	A	A	T	T	T	C	A	T	A	A	A	A	T	A	A	N	A	A	A	A	A	G	A	G	G	T	T	A	T	A	A	A	A	A	A	A	A	G	A	T
G	G	T	C	A	G	A	A	A	T	G	T	A	A	T	G	T	T	T	T	T	T	T	G	G	N	T	T	T	T	T	T	A	T	G	T	A	T	T	G	T	T	T	T	G	T	T	G	T	T
G	G	A	A	G	C	A	A	A	T	G	C	A	C	C	T	T	C	T	T	T	T	C	G	G	N	T	T	T	T	T	A	A	G	G	C	A	T	C	G	T	T	T	T	G	T	C	G	T	C
G	G	G	T	G	T	G	G	C	C	G	T	G	C	T	A	C	T	C	C	C	C	T	G	G	N	C	C	C	C	C	G	G	T	T	T	G	C	T	G	C	C	C	C	G	C	T	T	C	T
T	T	G	A	G	A	G	G	C	T	T	G	G	A	T	A	T	T	T	T	T	T	T	T	T	N	T	T	T	T	T	G	G	T	G	T	G	T	T	T	T	T	T	T	T	T	G	G	T	T
G	G	A	A	T	G	G	T	A	T	G	G	G	T	C	G	T	C	T	T	T	T	C	G	G	N	T	T	T	T	T	A	T	G	G	C	G	T	C	G	T	T	T	T	G	T	G	G	T	C
G	G	C	T	G	C	T	T	T	C	G	C	T	A	G	G	C	G	C	C	C	C	G	G	G	N	C	C	C	C	C	C	T	T	T	G	T	C	G	G	C	C	C	C	G	C	C	T	C	G
T	T	C	G	G	G	G	T	T	G	T	T	G	A	T	G	G	T	G	G	G	G	T	T	T	N	G	G	G	G	G	C	T	T	C	T	G	G	T	T	G	G	G	G	T	G	T	C	G	T
C	C	T	A	T	C	G	G	C	T	C	T	G	T	A	T	T	A	T	T	T	T	A	C	C	N	T	T	T	T	T	T	G	C	G	A	G	T	A	C	T	T	T	T	C	T	T	G	T	A
G	G	G	A	C	T	T	G	T	A	G	G	T	G	A	G	A	A	A	A	A	A	A	G	G	N	A	A	A	A	A	G	G	A	C	A	T	A	A	G	A	A	A	A	G	A	G	C	A	A
C	C	A	T	G	A	C	A	T	A	C	A	C	A	G	G	A	G	A	A	A	A	G	C	C	N	A	A	A	A	A	A	A	G	A	G	C	A	G	C	A	A	A	A	C	A	A	A	A	G
A	A	G	C	C	A	G	T	C	G	A	A	G	A	G	T	G	G	G	G	G	G	G	A	A	N	G	G	G	G	G	G	T	T	C	G	G	G	G	A	G	G	G	G	A	G	A	C	G	G
C	C	C	T	A	C	C	T	G	G	C	A	C	T	G	C	G	G	G	G	G	G	G	C	C	N	G	G	G	G	G	C	T	T	T	G	C	G	G	C	G	G	G	G	C	G	A	T	G	G
T	T	A	G	C	A	A	A	T	G	T	A	A	C	T	G	G	T	G	G	G	G	T	T	T	N	G	G	G	G	G	A	A	G	A	T	A	G	T	T	G	G	G	G	T	G	A	A	G	T
A	A	T	G	T	T	C	T	A	T	A	C	C	T	G	C	T	G	T	T	T	T	G	A	A	N	T	T	T	T	T	T	T	A	T	G	C	T	G	A	T	T	T	T	A	T	C	T	T	G
T	T	A	C	A	A	T	A	A	G	T	C	T	G	G	A	G	G	G	G	G	G	G	T	T	N	G	G	G	G	G	A	A	C	T	G	T	G	G	T	G	G	G	G	T	G	C	T	G	G
T	T	G	T	T	G	A	A	G	G	T	A	A	G	T	C	G	T	G	G	G	G	T	T	T	N	G	G	G	G	G	G	A	T	G	T	A	G	T	T	G	G	G	G	T	G	A	G	G	T
G	G	T	T	T	G	T	A	G	T	G	T	T	C	C	T	T	C	T	T	T	T	C	G	G	N	T	T	T	T	T	T	A	T	C	C	T	T	C	G	T	T	T	T	G	T	T	C	T	C
C	C	C	G	G	T	T	G	G	C	C	T	T	T	G	A	C	G	C	C	C	C	G	C	C	N	C	C	C	C	C	C	G	C	C	G	T	C	G	C	C	C	C	C	C	C	T	C	C	G
C	C	T	A	C	T	G	C	T	G	C	C	G	T	C	T	G	C	G	G	G	G	C	C	C	N	G	G	G	G	G	T	C	G	T	C	G	G	C	C	G	G	G	G	C	G	C	T	G	C
T	T	T	A	C	G	C	A	G	C	T	T	C	G	A	T	C	A	C	C	C	C	A	T	T	N	C	C	C	C	C	T	A	C	T	A	C	C	A	T	C	C	C	C	T	C	T	T	C	A
T	T	G	A	T	T	C	T	G	A	T	T	C	A	C	G	A	C	A	A	A	A	C	T	T	N	A	A	A	A	A	G	T	A	T	C	C	A	C	T	A	A	A	A	T	A	T	T	A	C
T	T	C	A	T	A	T	T	T	C	T	C	T	A	T	C	C	T	C	C	C	C	T	T	T	N	C	C	C	C	C	C	T	G	G	T	T	C	T	T	C	C	C	C	T	C	C	G	C	T
G	G	C	C	T	A	T	C	C	T	G	G	T	A	A	C	T	A	T	T	T	T	A	G	G	N	T	T	T	T	T	C	C	T	G	A	T	T	A	G	T	T	T	T	G	T	G	G	T	A
G	G	G	C	G	C	T	A	G	A	G	T	T	A	T	T	A	T	A	A	A	A	T	G	G	N	A	A	A	A	A	G	A	G	A	T	T	A	T	G	A	A	A	A	G	A	T	A	A	T
A	A	A	A	G	C	G	A	C	T	A	A	G	C	T	T	T	T	T	T	T	T	T	A	A	N	T	T	T	T	T	A	A	G	G	T	G	T	T	A	T	T	T	T	A	T	A	G	T	T
G	G	A	T	A	A	G	A	A	T	G	A	G	C	G	T	T	G	T	T	T	T	G	G	G	N	T	T	T	T	T	A	A	C	G	G	G	T	G	G	T	T	T	T	G	T	A	G	T	G
G	G	T	T	G	T	A	C	C	G	G	G	A	A	C	G	G	C	G	G	G	G	C	G	G	N	G	G	G	G	G	T	C	T	C	C	A	G	C	G	G	G	G	G	G	G	G	C	G	C
C	C	A	C	G	A	G	A	T	C	C	G	G	T	C	G	C	C	C	C	C	C	C	C	C	N	C	C	C	C	C	A	A	A	T	C	G	C	C	C	C	C	C	C	C	C	G	T	C	C
T	T	C	T	C	C	G	A	A	C	T	G	G	T	T	A	C	T	C	C	C	C	T	T	T	N	C	C	C	C	C	C	A	A	G	T	G	C	T	T	C	C	C	C	T	C	G	G	C	T
G	G	C	T	T	A	C	A	T	T	G	T	C	C	T	G	T	T	T	T	T	T	T	G	G	N	T	T	T	T	T	C	A	C	T	T	C	T	T	G	T	T	T	T	G	T	T	T	T	T
T	T	A	C	G	G	T	T	T	T	T	G	T	T	T	G	T	T	T	T	T	T	T	T	T	N	T	T	T	T	T	A	T	T	G	T	T	T	T	T	T	T	T	T	T	T	G	G	T	T
G	G	T	G	T	G	G	T	G	T	G	G	G	T	G	C	T	G	T	T	T	T	G	G	G	N	T	T	T	T	T	T	T	A	T	G	G	T	G	G	T	T	T	T	G	T	G	T	T	G
T	T	A	T	G	T	T	G	C	G	T	T	T	C	G	T	G	G	G	G	G	G	G	T	T	N	G	G	G	G	G	A	G	A	G	G	T	G	G	T	G	G	G	G	T	G	T	G	G	G
G	G	A	A	T	G	G	T	C	G	G	C	G	G	A	G	G	A	G	G	G	G	A	G	G	N	G	G	G	G	G	A	T	C	T	A	G	G	A	G	G	G	G	G	G	G	C	T	G	A
T	T	T	A	G	T	T	T	T	A	T	G	T	T	G	T	A	G	A	A	A	A	G	T	T	N	A	A	A	A	A	T	T	A	T	G	T	A	G	T	A	A	A	A	T	A	G	T	A	G
T	T	G	G	T	T	G	G	T	G	T	C	G	A	G	G	G	G	G	G	G	G	G	T	T	N	G	G	G	G	G	G	G	T	C	G	G	G	G	T	G	G	G	G	T	G	C	C	G	G
C	C	A	G	T	G	T	A	T	G	C	A	T	A	C	T	G	C	G	G	G	G	C	C	C	N	G	G	G	G	G	A	A	C	T	C	T	G	C	C	G	G	G	G	C	G	A	T	G	C
T	T	A	G	C	T	T	A	G	C	T	C	T	G	T	G	C	T	C	C	C	C	T	T	T	N	C	C	C	C	C	A	A	T	C	T	T	C	T	T	C	C	C	C	T	C	C	C	C	T
C	C	T	T	T	T	C	T	G	T	C	T	C	G	G	T	T	G	T	T	T	T	G	C	C	N	T	T	T	T	T	T	T	T	T	G	C	T	G	C	T	T	T	T	C	T	T	T	T	G
T	T	C	G	C	G	T	C	A	G	T	A	T	G	T	T	G	T	G	G	G	G	T	T	T	N	G	G	G	G	G	C	C	T	T	T	T	G	T	T	G	G	G	G	T	G	A	T	G	T
T	T	T	G	T	G	C	C	G	T	T	T	C	T	G	C	T	G	T	T	T	T	G	T	T	N	T	T	T	T	T	T	C	G	A	G	C	T	G	T	T	T	T	T	T	T	T	A	T	G
A	A	G	T	T	A	T	T	G	G	A	T	T	G	T	T	G	T	G	G	G	G	T	A	A	N	G	G	G	G	G	G	T	G	T	T	T	G	T	A	G	G	G	G	A	G	T	T	G	T
T	T	G	C	A	G	T	G	C	T	T	G	T	G	G	C	T	G	T	T	T	T	G	T	T	N	T	T	T	T	T	G	G	C	G	G	T	T	G	T	T	T	T	T	T	T	G	G	T	G
G	G	C	G	T	A	A	T	T	G	G	C	A	T	T	T	G	T	G	G	G	G	T	G	G	N	G	G	G	G	G	C	T	A	T	T	A	G	T	G	G	G	G	G	G	G	C	T	G	T
T	T	T	C	G	A	T	G	G	T	T	C	T	C	T	T	T	T	T	T	T	T	T	T	T	N	T	T	T	T	T	T	G	C	T	T	T	T	T	T	T	T	T	T	T	T	C	T	T	T
T	T	T	A	T	G	G	G	T	T	T	T	G	G	C	A	T	C	T	T	T	T	C	T	T	N	T	T	T	T	T	T	G	T	G	C	G	T	C	T	T	T	T	T	T	T	T	G	T	C
G	G	G	C	T	G	T	T	G	C	G	T	T	C	T	T	C	T	C	C	C	C	T	G	G	N	C	C	C	C	C	G	T	G	G	T	T	C	T	G	C	C	C	C	G	C	T	G	C	T
G	G	A	T	G	T	T	A	T	T	G	T	T	A	C	G	T	C	T	T	T	T	C	G	G	N	T	T	T	T	T	A	A	T	T	C	T	T	C	G	T	T	T	T	G	T	T	T	T	C
T	T	A	A	G	T	G	A	G	C	T	G	G	C	T	T	C	T	C	C	C	C	T	T	T	N	C	C	C	C	C	A	A	T	T	T	G	C	T	T	C	C	C	C	T	C	G	T	C	T
T	T	A	T	T	C	G	T	T	T	T	G	G	T	T	T	T	T	T	T	T	T	T	T	T	N	T	T	T	T	T	A	T	T	G	T	G	T	T	T	T	T	T	T	T	T	G	G	T	T
G	G	A	T	T	C	T	T	T	T	G	A	T	A	A	G	T	A	T	T	T	T	A	G	G	N	T	T	T	T	T	A	T	A	C	A	T	T	A	G	T	T	T	T	G	T	A	C	T	A
C	C	C	G	G	G	T	T	C	A	C	G	T	T	T	G	A	T	A	A	A	A	T	C	C	N	A	A	A	A	A	C	T	T	C	T	T	A	T	C	A	A	A	A	C	A	G	C	A	T
C	C	C	C	C	A	G	T	T	T	C	G	G	T	G	T	T	G	T	T	T	T	G	C	C	N	T	T	T	T	T	C	T	G	A	G	G	T	G	C	T	T	T	T	C	T	G	A	T	G
A	A	A	C	C	A	C	A	C	G	A	C	C	G	T	T	G	T	G	G	G	G	T	A	A	N	G	G	G	G	G	A	A	A	T	T	C	G	T	A	G	G	G	G	A	G	C	T	G	T
T	T	T	T	A	G	C	A	T	T	T	T	C	C	T	G	T	T	T	T	T	T	T	T	T	N	T	T	T	T	T	T	A	A	A	T	C	T	T	T	T	T	T	T	T	T	T	A	T	T
A	A	T	T	T	G	A	A	T	T	A	G	A	C	G	C	T	G	T	T	T	T	G	A	A	N	T	T	T	T	T	T	A	A	A	G	A	T	G	A	T	T	T	T	A	T	G	A	T	G
A	A	C	T	A	T	T	G	A	G	A	T	T	T	G	C	G	G	G	G	G	G	G	A	A	N	G	G	G	G	G	C	G	A	C	G	T	G	G	A	G	G	G	G	A	G	T	C	G	G
C	C	T	G	A	C	A	T	T	G	C	G	A	T	T	A	G	T	G	G	G	G	T	C	C	N	G	G	G	G	G	T	T	A	A	T	A	G	T	C	G	G	G	G	C	G	G	A	G	T
A	A	T	G	C	T	A	T	G	T	A	T	A	T	T	T	T	T	T	T	T	T	T	A	A	N	T	T	T	T	T	T	T	C	A	T	A	T	T	A	T	T	T	T	A	T	T	A	T	T
A	A	C	A	A	T	C	A	T	T	A	G	C	G	G	A	T	G	T	T	T	T	G	A	A	N	T	T	T	T	T	C	A	T	G	G	C	T	G	A	T	T	T	T	A	T	G	G	T	G
G	G	G	G	A	A	A	C	T	G	G	T	A	G	C	A	G	C	G	G	G	G	C	G	G	N	G	G	G	G	G	G	C	C	T	C	A	G	C	G	G	G	G	G	G	G	T	T	G	C
T	T	T	G	G	A	A	A	G	C	T	T	A	A	C	C	C	C	C	C	C	C	C	T	T	N	C	C	C	C	C	T	A	A	G	C	A	C	C	T	C	C	C	C	T	C	T	G	C	C
G	G	A	C	T	T	G	A	G	C	G	C	G	G	A	A	C	A	C	C	C	C	A	G	G	N	C	C	C	C	C	A	A	A	T	A	G	C	A	G	C	C	C	C	G	C	C	T	C	A
T	T	A	T	G	G	T	A	T	A	T	T	T	G	T	A	A	T	A	A	A	A	T	T	T	N	A	A	A	A	A	A	A	A	G	T	T	A	T	T	A	A	A	A	T	A	T	G	A	T
G	G	G	G	T	A	G	A	T	T	G	C	G	C	A	G	T	A	T	T	T	T	A	G	G	N	T	T	T	T	T	G	A	C	C	A	G	T	A	G	T	T	T	T	G	T	C	C	T	A
C	C	G	T	G	C	T	G	G	A	C	T	T	T	A	T	A	A	A	A	A	A	A	C	C	N	A	A	A	A	A	G	G	C	C	A	T	A	A	C	A	A	A	A	C	A	T	C	A	A
C	C	G	G	C	A	G	G	C	A	C	T	G	G	C	G	A	C	A	A	A	A	C	C	C	N	A	A	A	A	A	G	G	C	T	C	G	A	C	C	A	A	A	A	C	A	T	T	A	C
T	T	T	T	C	A	C	A	C	C	T	A	C	T	A	T	C	A	C	C	C	C	A	T	T	N	C	C	C	C	C	T	A	G	A	A	C	C	A	T	C	C	C	C	T	C	A	A	C	A
A	A	G	G	T	C	C	A	A	A	A	T	C	G	A	G	A	A	A	A	A	A	A	A	A	N	A	A	A	A	A	G	A	T	T	A	C	A	A	A	A	A	A	A	A	A	T	T	A	A
T	T	G	T	A	C	T	A	T	A	T	G	T	T	G	C	A	G	A	A	A	A	G	T	T	N	A	A	A	A	A	G	A	C	T	G	T	A	G	T	A	A	A	A	T	A	G	T	A	G
T	T	T	T	T	T	A	A	A	G	T	T	A	G	T	C	G	T	G	G	G	G	T	T	T	N	G	G	G	G	G	T	A	C	G	T	A	G	T	T	G	G	G	G	T	G	T	G	G	T
G	G	C	C	T	T	T	G	A	T	G	T	T	T	G	T	T	G	T	T	T	T	G	G	G	N	T	T	T	T	T	C	G	T	G	G	T	T	G	G	T	T	T	T	G	T	T	G	T	G
G	G	G	T	G	C	T	C	C	G	G	G	T	T	T	A	G	T	G	G	G	G	T	G	G	N	G	G	G	G	G	G	C	T	G	T	T	G	T	G	G	G	G	G	G	G	G	G	G	T
G	G	C	C	G	T	G	T	A	T	G	G	G	C	G	T	T	G	T	T	T	T	G	G	G	N	T	T	T	T	T	C	T	G	T	G	G	T	G	G	T	T	T	T	G	T	G	T	T	G
T	T	A	T	G	T	G	A	A	G	T	T	G	T	C	T	G	C	G	G	G	G	C	T	T	N	G	G	G	G	G	A	A	A	T	C	G	G	C	T	G	G	G	G	T	G	T	T	G	C
T	T	C	T	T	G	G	A	G	C	T	T	G	C	C	G	C	C	C	C	C	C	C	T	T	N	C	C	C	C	C	C	A	T	C	C	G	C	C	T	C	C	C	C	T	C	T	C	C	C
C	C	T	A	T	A	T	A	T	C	C	G	T	T	T	G	C	T	C	C	C	C	T	C	C	N	C	C	C	C	C	T	A	T	C	T	T	C	T	C	C	C	C	C	C	C	G	C	C	T
C	C	A	T	C	A	T	A	G	T	C	C	T	T	A	G	T	A	T	T	T	T	A	C	C	N	T	T	T	T	T	A	A	G	A	A	T	T	A	C	T	T	T	T	C	T	N	A	T	A
A	A	T	G	C	A	C	A	T	A	A	C	C	A	T	T	A	T	A	A	A	A	T	A	A	N	A	A	A	A	A	T	A	G	C	T	C	A	T	A	A	A	A	A	A	A	C	C	A	T
C	C	T	T	A	T	C	A	G	T	C	A	C	T	T	T	T	T	T	T	T	T	T	C	C	N	T	T	T	T	T	T	A	C	G	T	C	T	T	C	T	T	T	T	C	T	A	G	T	T
G	G	G	T	C	A	A	G	C	T	G	T	A	G	G	C	T	G	T	T	T	T	G	G	G	N	T	T	T	T	T	G	G	T	T	G	A	T	G	G	T	T	T	T	G	T	T	T	T	G
T	T	C	G	G	C	C	G	C	G	T	A	C	T	G	C	G	G	G	G	G	G	G	T	T	N	G	G	G	G	G	C	G	T	G	G	C	G	G	T	G	G	G	G	T	G	A	G	G	G
G	G	C	G	T	T	G	T	T	G	G	A	G	T	G	A	G	G	G	G	G	G	G	G	G	N	G	G	G	G	G	C	T	G	C	G	G	G	G	G	G	G	G	G	G	G	A	C	G	G
C	C	T	T	G	C	T	G	A	G	C	C	T	G	T	C	G	T	G	G	G	G	T	C	C	N	G	G	G	G	G	T	G	A	T	T	T	G	T	C	G	G	G	G	C	G	C	T	G	T
T	T	T	T	C	C	G	C	T	T	T	A	G	G	T	G	T	T	T	T	T	T	T	T	T	N	T	T	T	T	T	T	C	A	A	T	G	T	T	T	T	T	T	T	T	T	A	A	T	T
A	A	T	G	T	A	C	C	T	T	A	A	C	T	C	T	T	C	T	T	T	T	C	A	A	N	T	T	T	T	T	T	C	G	G	C	C	T	C	A	T	T	T	T	A	T	A	G	T	C
G	G	G	C	A	A	T	T	G	C	G	G	T	T	C	G	C	C	C	C	C	C	C	G	G	N	C	C	C	C	C	G	T	A	C	C	T	C	C	G	C	C	C	C	G	C	G	C	C	C
C	C	G	C	G	A	A	G	G	C	C	T	A	G	A	C	C	A	C	C	C	C	A	C	C	N	C	C	C	C	C	G	G	G	G	A	A	C	A	C	C	C	C	C	C	C	T	G	C	A
G	G	A	A	C	A	G	G	G	A	G	G	G	C	C	T	A	C	A	A	A	A	C	G	G	N	A	A	A	A	A	A	G	A	C	C	G	A	C	G	A	A	A	A	G	A	G	C	A	C
C	C	G	T	G	A	C	A	T	C	C	T	C	C	G	A	C	G	C	C	C	C	G	C	C	N	C	C	C	C	C	G	A	A	T	G	C	C	G	C	C	C	C	C	C	C	T	T	C	G
T	T	G	A	C	G	G	A	T	G	T	G	G	A	T	G	G	T	G	G	G	G	T	T	T	N	G	G	G	G	G	G	A	G	A	T	G	G	T	T	G	G	G	G	T	G	G	A	G	T
A	A	C	A	T	A	C	T	C	T	A	C	C	T	G	C	T	G	T	T	T	T	G	A	A	N	T	T	T	T	T	C	T	T	A	G	C	T	G	A	T	T	T	T	A	T	C	A	T	G
A	A	T	C	A	G	T	A	C	G	A	C	T	A	C	G	G	C	G	G	G	G	C	A	A	N	G	G	G	G	G	T	A	T	C	C	T	G	C	A	G	G	G	G	A	G	C	C	G	C
C	C	G	A	A	A	A	T	A	C	C	T	A	A	T	C	C	T	C	C	C	C	T	C	C	N	C	C	C	C	C	G	T	T	A	T	A	C	T	C	C	C	C	C	C	C	T	A	C	T
A	A	T	A	C	A	A	T	C	T	A	A	A	C	A	T	T	A	T	T	T	T	A	A	A	N	T	T	T	T	T	T	T	A	T	A	A	T	A	A	T	T	T	T	A	T	A	T	T	A
T	T	G	G	A	A	C	G	G	A	T	T	C	A	G	A	A	G	A	A	A	A	G	T	T	N	A	A	A	A	A	G	G	A	A	G	C	A	G	T	A	A	A	A	T	A	T	A	A	G
A	A	T	T	T	G	A	G	T	G	A	T	A	A	C	A	G	C	G	G	G	G	C	A	A	N	G	G	G	G	G	T	G	G	G	C	A	G	C	A	G	G	G	G	A	G	T	G	G	C
G	G	G	G	A	T	T	T	G	C	G	G	T	G	G	C	C	G	C	C	C	C	G	G	G	N	C	C	C	C	C	G	T	G	G	G	T	C	G	G	C	C	C	C	G	C	G	G	C	G
G	G	T	T	G	C	A	G	C	G	G	G	A	T	C	A	G	C	G	G	G	G	C	G	G	N	G	G	G	G	G	T	G	A	T	C	A	G	C	G	G	G	G	G	G	G	G	T	G	C
T	T	T	G	G	A	G	A	T	C	T	G	G	G	T	T	C	T	C	C	C	C	T	T	T	N	C	C	C	C	C	T	A	A	T	T	G	C	T	T	C	C	C	C	T	C	G	T	C	T
T	T	C	C	T	A	G	A	A	T	T	T	G	T	A	A	T	A	T	T	T	T	A	T	T	N	T	T	T	T	T	C	A	G	G	A	G	T	A	T	T	T	T	T	T	T	T	G	T	A
G	G	T	C	T	C	T	C	G	A	G	T	T	G	A	G	A	A	A	A	A	A	A	G	G	N	A	A	A	A	A	T	C	G	T	A	T	A	A	G	A	A	A	A	G	A	T	T	A	A
T	T	C	T	G	A	T	A	C	A	T	C	T	C	C	G	A	C	A	A	A	A	C	T	T	N	A	A	A	A	A	C	A	T	A	C	T	A	C	T	A	A	A	A	T	A	C	A	A	C
A	A	T	A	T	T	G	G	G	C	A	C	G	C	A	T	C	A	C	C	C	C	A	A	A	N	C	C	C	C	C	T	G	G	A	A	G	C	A	A	C	C	C	C	A	C	C	A	C	A
A	A	T	T	A	C	T	A	C	A	A	A	T	T	T	T	A	T	A	A	A	A	T	A	A	N	A	A	A	A	A	T	A	T	C	T	T	A	T	A	A	A	A	A	A	A	A	C	A	T
C	C	A	T	A	A	A	A	T	T	C	C	A	A	A	G	T	A	T	T	T	T	A	C	C	N	T	T	T	T	T	A	A	A	C	A	A	T	A	C	T	T	T	T	C	T	C	C	T	A
C	C	T	G	C	A	A	A	A	A	C	G	A	T	G	T	A	G	A	A	A	A	G	C	C	N	A	A	A	A	A	T	A	G	A	G	A	A	G	C	A	A	A	A	C	A	G	A	A	G
A	A	G	G	C	T	C	T	A	G	A	T	C	T	G	A	G	G	G	G	G	G	G	A	A	N	G	G	G	G	G	G	T	A	T	G	C	G	G	A	G	G	G	G	A	G	T	T	G	G
T	T	T	G	A	A	C	C	C	G	T	G	C	G	T	A	G	T	G	G	G	G	T	T	T	N	G	G	G	G	G	T	C	G	A	T	C	G	T	T	G	G	G	G	T	G	G	A	G	T
A	A	T	T	T	T	A	A	A	T	A	C	A	G	T	C	T	T	T	T	T	T	T	A	A	N	T	T	T	T	T	T	A	T	C	T	A	T	T	A	T	T	T	T	A	T	C	C	T	T
C	C	G	T	A	T	T	A	T	T	C	T	T	G	G	C	T	G	T	T	T	T	G	C	C	N	T	T	T	T	T	G	A	T	A	G	T	T	G	C	T	T	T	T	C	T	T	A	T	G
A	A	G	C	C	G	A	T	A	G	A	A	A	T	T	A	G	T	G	G	G	G	T	A	A	N	G	G	G	G	G	G	T	T	G	T	A	G	T	A	G	G	G	G	A	G	A	G	G	T
G	G	T	C	A	T	C	A	G	T	G	G	C	T	A	T	T	A	T	T	T	T	A	G	G	N	T	T	T	T	T	T	A	C	G	A	C	T	A	G	T	T	T	T	G	T	G	G	T	A
G	G	T	A	G	T	A	C	G	A	G	C	A	C	A	A	A	A	A	A	A	A	A	G	G	N	A	A	A	A	A	T	C	T	T	A	A	A	A	G	A	A	A	A	G	A	C	T	A	A
T	T	G	C	G	G	G	T	T	A	T	G	G	C	C	C	A	C	A	A	A	A	C	T	T	N	A	A	A	A	A	G	T	T	G	C	G	A	C	T	A	A	A	A	T	A	G	G	A	C
G	G	C	G	T	G	G	G	T	C	G	C	G	A	C	A	C	C	C	C	C	C	C	G	G	N	C	C	C	C	C	C	G	A	T	C	G	C	C	G	C	C	C	C	G	C	C	T	C	C
T	T	C	T	G	T	T	A	G	C	T	T	T	C	A	G	C	A	C	C	C	C	A	T	T	N	C	C	C	C	C	C	A	G	T	A	T	C	A	T	C	C	C	C	T	C	T	T	C	A
T	T	A	G	T	G	G	G	T	A	T	A	G	G	T	G	A	T	A	A	A	A	T	T	T	N	A	A	A	A	A	A	G	A	G	T	G	A	T	T	A	A	A	A	T	A	A	G	A	T
G	G	T	C	T	A	T	T	A	T	G	A	T	T	A	T	T	A	T	T	T	T	A	G	G	N	T	T	T	T	T	T	T	G	T	A	T	T	A	G	T	T	T	T	G	T	A	T	T	A
T	T	A	T	G	C	T	C	A	A	T	C	T	G	C	G	A	C	A	A	A	A	C	T	T	N	A	A	A	A	A	A	C	A	T	C	T	A	C	T	A	A	A	A	T	A	C	T	A	C
T	T	A	A	T	T	G	C	C	C	T	A	G	C	A	T	C	A	C	C	C	C	A	T	T	N	C	C	C	C	C	A	C	C	G	A	G	C	A	T	C	C	C	C	T	C	A	G	C	A
G	G	C	G	T	T	T	T	C	A	G	T	T	T	G	T	A	G	A	A	A	A	G	G	G	N	A	A	A	A	A	C	T	G	G	G	T	A	G	G	A	A	A	A	G	A	T	G	A	G
G	G	A	C	G	T	T	C	A	G	G	A	T	A	G	G	G	G	G	G	G	G	G	G	G	N	G	G	G	G	G	A	C	G	A	G	T	G	G	G	G	G	G	G	G	G	A	A	G	G
A	A	A	G	G	A	G	T	T	G	A	G	G	G	T	T	G	T	G	G	G	G	T	A	A	N	G	G	G	G	G	A	T	T	G	T	G	G	T	A	G	G	G	G	A	G	G	G	G	T
G	G	G	C	A	A	G	T	A	T	G	G	G	C	G	T	T	G	T	T	T	T	G	G	G	N	T	T	T	T	T	G	T	T	A	G	G	T	G	G	T	T	T	T	G	T	G	A	T	G
A	A	T	T	G	A	A	T	C	G	A	T	A	G	T	G	G	T	G	G	G	G	T	A	A	N	G	G	G	G	G	T	T	G	A	T	A	G	T	A	G	G	G	G	A	G	T	A	G	T
A	A	G	A	A	C	G	A	A	T	A	T	G	C	T	G	T	T	T	T	T	T	T	A	A	N	T	T	T	T	T	G	A	G	G	T	G	T	T	A	T	T	T	T	A	T	T	G	T	T
G	G	T	A	A	T	A	T	G	T	G	G	A	T	G	A	T	G	T	T	T	T	G	G	G	N	T	T	T	T	T	T	T	G	G	G	A	T	G	G	T	T	T	T	G	T	G	G	T	G
G	G	G	C	G	T	A	G	G	G	G	T	A	A	T	G	G	T	G	G	G	G	T	G	G	N	G	G	G	G	G	G	G	A	T	T	A	G	T	G	G	G	G	G	G	G	T	T	G	T
T	T	C	A	G	A	G	C	T	T	T	A	G	A	T	A	T	T	T	T	T	T	T	T	T	N	T	T	T	T	T	C	C	A	T	T	G	T	T	T	T	T	T	T	T	T	A	T	T	T
T	T	C	T	T	A	G	A	G	T	T	A	G	C	G	A	T	G	T	T	T	T	G	T	T	N	T	T	T	T	T	C	A	A	C	G	G	T	G	T	T	T	T	T	T	T	A	C	T	G
C	C	T	A	T	T	T	T	T	G	C	C	T	A	G	G	G	G	G	G	G	G	G	C	C	N	G	G	G	G	G	T	T	T	C	G	T	G	G	C	G	G	G	G	C	G	C	C	G	G
C	C	A	G	C	G	T	T	T	G	C	C	T	T	A	G	G	A	G	G	G	G	A	C	C	N	G	G	G	G	G	A	T	T	G	A	T	G	A	C	G	G	G	G	C	G	C	G	G	A
G	G	T	G	C	A	C	T	G	A	G	A	C	A	G	T	A	G	A	A	A	A	G	G	G	N	A	A	A	A	A	T	T	G	A	G	C	A	G	G	A	A	A	A	G	A	A	A	A	G
A	A	T	T	G	A	C	G	T	G	A	T	C	G	A	T	G	A	G	G	G	G	A	A	A	N	G	G	G	G	G	T	G	T	A	A	C	G	A	A	G	G	G	G	A	G	T	A	G	A
A	A	G	T	A	G	G	C	T	A	A	A	G	G	A	C	A	A	A	A	A	A	A	A	A	N	A	A	A	A	A	G	C	T	G	A	G	A	A	A	A	A	A	A	A	A	A	G	A	A
G	G	G	G	A	A	A	A	G	A	G	C	A	T	G	C	A	G	A	A	A	A	G	G	G	N	A	A	A	A	A	G	A	A	G	G	A	A	G	G	A	A	A	A	G	A	C	G	A	G
G	G	G	T	G	G	A	T	G	G	G	A	A	T	G	G	G	G	G	G	G	G	G	G	G	N	G	G	G	G	G	G	T	A	T	G	A	G	G	G	G	G	G	G	G	G	A	T	G	G
T	T	T	A	G	A	G	C	A	G	T	G	G	G	T	A	G	T	G	G	G	G	T	T	T	N	G	G	G	G	G	T	C	A	C	T	G	G	T	T	G	G	G	G	T	G	G	C	G	T
C	C	T	A	T	T	G	A	G	T	C	G	G	T	T	A	T	T	T	T	T	T	T	C	C	N	T	T	T	T	T	T	A	T	T	T	G	T	T	C	T	T	T	T	C	T	G	T	T	T
T	T	C	C	C	C	T	G	A	T	T	T	T	A	C	G	T	C	T	T	T	T	C	T	T	N	T	T	T	T	T	C	G	T	T	C	T	T	C	T	T	T	T	T	T	T	T	T	T	C
T	T	C	C	T	G	C	A	A	C	T	G	C	A	C	G	C	C	C	C	C	C	C	T	T	N	C	C	C	C	C	C	A	T	A	C	C	C	C	T	C	C	C	C	T	C	G	A	C	C
A	A	A	A	T	C	T	G	G	C	A	T	T	C	G	T	C	G	C	C	C	C	G	A	A	N	C	C	C	C	C	A	G	A	A	G	T	C	G	A	C	C	C	C	A	C	T	A	C	G
A	A	C	T	A	C	T	G	G	G	A	T	T	C	A	C	G	A	G	G	G	G	A	A	A	N	G	G	G	G	G	C	G	T	T	A	T	G	A	A	G	G	G	G	A	G	T	T	G	A
T	T	G	A	A	A	A	C	T	A	T	G	A	A	A	T	A	A	A	A	A	A	A	T	T	N	A	A	A	A	A	G	C	C	G	A	A	A	A	T	A	A	A	A	T	A	G	G	A	A
G	G	T	C	T	T	A	T	T	A	G	T	A	T	G	T	A	G	A	A	A	A	G	G	G	N	A	A	A	A	A	T	T	T	A	G	A	A	G	G	A	A	A	A	G	A	T	A	A	G
A	A	G	A	G	T	T	G	C	G	A	T	T	A	G	A	G	G	G	G	G	G	G	A	A	N	G	G	G	G	G	G	G	C	C	G	T	G	G	A	G	G	G	G	A	G	T	C	G	G
C	C	C	G	A	A	G	C	C	G	C	G	G	C	T	A	G	T	G	G	G	G	T	C	C	N	G	G	G	G	G	C	C	A	A	T	G	G	T	C	G	G	G	G	C	G	G	A	G	T
A	A	T	G	C	T	A	T	G	T	A	G	A	A	C	T	T	C	T	T	T	T	C	A	A	N	T	T	T	T	T	T	T	A	A	C	A	T	C	A	T	T	T	T	A	T	G	A	T	C
A	A	A	T	A	T	C	C	A	C	A	A	C	G	T	G	C	T	C	C	C	C	T	A	A	N	C	C	C	C	C	A	C	C	C	T	C	C	T	A	C	C	C	C	A	C	A	C	C	T
C	C	G	G	A	T	A	G	A	T	C	G	A	G	T	A	T	T	T	T	T	T	T	C	C	N	T	T	T	T	T	G	G	C	C	T	A	T	T	C	T	T	T	T	C	T	G	C	T	T
C	C	C	T	C	T	A	T	G	T	C	A	A	T	A	C	T	A	T	T	T	T	A	C	C	N	T	T	T	T	T	C	T	T	T	A	A	T	A	C	T	T	T	T	C	T	A	T	T	A
T	T	G	T	C	G	C	G	G	A	T	A	C	G	A	A	A	A	A	A	A	A	A	T	T	N	A	A	A	A	A	G	G	G	T	A	C	A	A	T	A	A	A	A	T	A	A	T	A	A
T	T	C	G	T	G	C	T	T	A	T	G	C	T	T	A	A	T	A	A	A	A	T	T	T	N	A	A	A	A	A	C	T	T	C	T	C	A	T	T	A	A	A	A	T	A	G	C	A	T
C	C	T	T	T	C	T	T	C	T	C	G	T	T	G	C	T	G	T	T	T	T	G	C	C	N	T	T	T	T	T	T	T	G	T	G	T	T	G	C	T	T	T	T	C	T	G	T	T	G
T	T	A	T	C	A	T	G	T	G	T	T	T	G	A	C	G	A	G	G	G	G	A	T	T	N	G	G	G	G	G	A	G	C	T	A	T	G	A	T	G	G	G	G	T	G	T	T	G	A
T	T	A	G	T	T	C	T	T	A	T	T	C	T	C	T	A	C	A	A	A	A	C	T	T	N	A	A	A	A	A	A	T	T	G	C	C	A	C	T	A	A	A	A	T	A	T	G	A	C
G	G	C	G	T	C	T	A	A	C	G	C	T	T	A	T	C	A	C	C	C	C	A	G	G	N	C	C	C	C	C	C	A	T	A	A	T	C	A	G	C	C	C	C	G	C	C	A	C	A
A	A	A	A	G	T	T	C	A	A	A	C	T	G	A	C	A	A	A	A	A	A	A	A	A	N	A	A	A	A	A	A	C	G	A	A	T	A	A	A	A	A	A	A	A	A	C	A	A	A
A	A	T	G	A	T	G	G	T	A	A	G	G	G	C	T	A	C	A	A	A	A	C	A	A	N	A	A	A	A	A	T	G	T	A	C	G	A	C	A	A	A	A	A	A	A	G	A	A	C
A	A	A	A	A	T	A	A	G	C	A	A	A	A	C	T	C	C	C	C	C	C	C	A	A	N	C	C	C	C	C	A	A	G	T	C	A	C	C	A	C	C	C	C	A	C	A	T	C	C
T	T	G	A	A	T	A	T	A	C	T	A	A	G	T	G	C	T	C	C	C	C	T	T	T	N	C	C	C	C	C	G	T	A	A	T	A	C	T	T	C	C	C	C	T	C	A	A	C	T
A	A	G	G	T	T	A	C	C	T	A	G	A	A	T	A	T	T	T	T	T	T	T	A	A	N	T	T	T	T	T	G	C	A	C	T	A	T	T	A	T	T	T	T	A	T	G	C	T	T
C	C	T	G	A	C	T	A	A	T	C	G	T	A	C	A	T	C	T	T	T	T	C	C	C	N	T	T	T	T	T	T	A	A	T	C	T	T	C	C	T	T	T	T	C	T	G	T	T	C
T	T	T	T	C	T	A	A	A	C	T	T	A	G	T	A	C	T	C	C	C	C	T	T	T	N	C	C	C	C	C	T	A	T	C	T	A	C	T	T	C	C	C	C	T	C	T	C	C	T
C	C	G	T	T	G	C	T	C	T	C	C	C	G	T	T	T	T	T	T	T	T	T	C	C	N	T	T	T	T	T	G	T	T	C	T	C	T	T	C	T	T	T	T	C	T	C	C	T	T
C	C	T	C	C	C	T	T	C	T	C	T	T	T	G	A	T	G	T	T	T	T	G	C	C	N	T	T	T	T	T	T	T	G	A	G	T	T	G	C	T	T	T	T	C	T	T	A	T	G
A	A	A	C	C	T	C	T	T	G	A	T	C	T	A	C	G	A	G	G	G	G	A	A	A	N	G	G	G	G	G	A	T	T	A	A	C	G	A	A	G	G	G	G	A	G	T	A	G	A
A	A	A	G	A	T	C	T	T	A	A	A	C	C	A	T	A	A	A	A	A	A	A	A	A	N	A	A	A	A	A	A	T	C	A	A	C	A	A	A	A	A	A	A	A	A	A	A	A	A
A	A	C	A	A	C	A	C	C	A	A	A	A	C	A	C	A	A	A	A	A	A	A	A	A	N	A	A	A	A	A	C	C	G	A	A	A	A	A	A	A	A	A	A	A	A	A	A	A	A
A	A	C	A	A	C	A	T	T	A	A	T	A	G	T	C	A	T	A	A	A	A	T	A	A	N	A	A	A	A	A	C	T	G	A	T	A	A	T	A	A	A	A	A	A	A	T	A	A	T
A	A	A	G	A	A	A	C	T	T	A	G	A	A	A	A	T	A	T	T	T	T	A	A	A	N	T	T	T	T	T	A	C	T	G	A	A	T	A	A	T	T	T	T	A	T	G	G	T	A
G	G	T	G	A	C	A	C	G	A	G	A	A	A	C	A	A	C	A	A	A	A	C	G	G	N	A	A	A	A	A	T	C	G	A	C	A	A	C	G	A	A	A	A	G	A	A	A	A	C
A	A	A	T	G	A	A	C	A	C	A	C	A	G	T	A	C	T	C	C	C	C	T	A	A	N	C	C	C	C	C	A	C	G	G	T	A	C	T	A	C	C	C	C	A	C	C	G	C	T
G	G	C	C	A	A	G	G	A	T	G	A	G	G	C	A	T	C	T	T	T	T	C	G	G	N	T	T	T	T	T	C	G	A	A	C	G	T	C	G	T	T	T	T	G	T	A	A	T	C
A	A	A	T	G	G	A	C	A	C	A	A	A	T	C	A	C	C	C	C	C	C	C	A	A	N	C	C	C	C	C	A	C	C	A	C	A	C	C	A	C	C	C	C	A	C	A	A	C	C
A	A	G	T	A	T	G	A	T	C	A	C	G	C	A	G	C	A	C	C	C	C	A	A	A	N	C	C	C	C	C	G	A	A	A	A	G	C	A	A	C	C	C	C	A	C	C	A	C	A
A	A	G	A	A	G	A	C	A	A	A	C	A	T	A	A	A	A	A	A	A	A	A	A	A	N	A	A	A	A	A	G	C	A	G	A	A	A	A	A	A	A	A	A	A	A	C	G	A	A
G	G	T	A	A	C	A	T	C	A	G	T	A	T	A	G	A	A	A	A	A	A	A	G	G	N	A	A	A	A	A	T	T	A	T	A	A	A	A	G	A	A	A	A	G	A	T	T	A	A
T	T	G	T	G	T	A	C	T	A	T	T	A	A	A	A	A	A	A	A	A	A	A	T	T	N	A	A	A	A	A	G	C	T	C	A	A	A	A	T	A	A	A	A	T	A	T	C	A	A
C	C	T	G	T	T	G	T	C	A	C	C	G	A	A	A	A	A	A	A	A	A	A	C	C	N	A	A	A	A	A	T	T	T	A	A	G	A	A	C	A	A	A	A	C	A	C	A	A	A
A	A	T	A	C	T	T	T	C	A	A	T	T	T	G	A	A	G	A	A	A	A	G	A	A	N	A	A	A	A	A	T	T	G	A	G	T	A	G	A	A	A	A	A	A	A	T	A	A	G
A	A	G	C	A	T	C	G	A	G	A	T	C	G	A	G	G	A	G	G	G	G	A	A	A	N	G	G	G	G	G	G	G	T	C	A	C	G	A	A	G	G	G	G	A	G	T	C	G	A
C	C	T	A	A	G	A	A	A	A	C	G	A	A	G	T	A	G	A	A	A	A	G	C	C	N	A	A	A	A	A	T	A	C	A	G	A	A	G	C	A	A	A	A	C	A	G	A	A	G
A	A	T	A	C	T	A	A	A	G	A	A	A	C	A	C	G	A	G	G	G	G	A	A	A	N	G	G	G	G	G	T	A	A	T	A	A	G	A	A	G	G	G	G	A	G	A	T	G	A
T	T	G	C	A	G	C	A	A	A	T	A	C	A	A	A	A	A	A	A	A	A	A	T	T	N	A	A	A	A	A	G	A	C	C	A	C	A	A	T	A	A	A	A	T	A	A	C	A	A
C	C	G	C	T	G	A	C	A	A	C	A	A	A	A	A	A	A	A	A	A	A	A	C	C	N	A	A	A	A	A	G	C	C	A	A	A	A	A	C	A	A	A	A	C	A	A	A	A	A
A	A	A	T	C	A	T	T	G	A	A	T	T	C	G	C	A	G	A	A	A	A	G	A	A	N	A	A	A	A	A	A	T	T	A	G	T	A	G	A	A	A	A	A	A	A	T	A	A	G
A	A	G	T	A	A	C	G	A	G	A	A	C	C	T	A	G	T	G	G	G	G	T	A	A	N	G	G	G	G	G	G	G	G	T	T	C	G	T	A	G	G	G	G	A	G	A	T	G	T
T	T	A	C	A	A	A	C	G	T	T	C	A	T	C	T	T	C	T	T	T	T	C	T	T	N	T	T	T	T	T	A	C	T	A	C	A	T	C	T	T	T	T	T	T	T	C	A	T	C
A	A	A	T	T	C	A	T	A	C	A	T	A	T	A	C	C	A	C	C	C	C	A	A	A	N	C	C	C	C	C	A	T	G	T	A	A	C	A	A	C	C	C	C	A	C	T	T	C	A
T	T	G	T	A	T	T	C	A	A	T	C	T	C	A	A	A	A	A	A	A	A	A	T	T	N	A	A	A	A	A	G	C	C	T	A	T	A	A	T	A	A	A	A	T	A	C	T	A	A
T	T	G	G	T	G	A	A	A	A	T	C	A	T	C	A	A	C	A	A	A	A	C	T	T	N	A	A	A	A	A	G	A	A	G	C	A	A	C	T	A	A	A	A	T	A	C	G	A	C
G	G	T	A	T	T	T	A	G	C	G	A	T	T	A	T	C	A	C	C	C	C	A	G	G	N	C	C	C	C	C	T	A	A	T	A	T	C	A	G	C	C	C	C	G	C	A	T	C	A
T	T	T	A	G	G	T	A	T	A	T	A	T	G	T	A	A	T	A	A	A	A	T	T	T	N	A	A	A	A	A	T	A	A	T	T	T	A	T	T	A	A	A	A	T	A	A	T	A	T
T	T	C	A	T	A	G	A	C	T	T	A	G	A	C	T	T	C	T	T	T	T	C	T	T	N	T	T	T	T	T	C	A	G	G	C	G	T	C	T	T	T	T	T	T	T	A	G	T	C
G	G	C	T	T	A	T	T	A	C	G	A	T	A	A	T	C	A	C	C	C	C	A	G	G	N	C	C	C	C	C	C	T	G	G	A	T	C	A	G	C	C	C	C	G	C	A	G	C	A
G	G	G	A	G	A	T	T	A	A	G	A	T	A	A	G	A	A	A	A	A	A	A	G	G	N	A	A	A	A	A	G	T	A	T	A	T	A	A	G	A	A	A	A	G	A	A	T	A	A
T	T	A	C	G	G	G	C	C	A	T	G	G	T	T	T	A	T	A	A	A	A	T	T	T	N	A	A	A	A	A	A	C	A	G	T	G	A	T	T	A	A	A	A	T	A	G	G	A	T
G	G	A	T	T	G	G	T	A	T	G	A	G	A	A	T	T	A	T	T	T	T	A	G	G	N	T	T	T	T	T	A	T	A	A	A	G	T	A	G	T	T	T	T	G	T	A	A	T	A
A	A	G	C	G	T	T	G	T	A	A	G	T	C	T	G	A	T	A	A	A	A	T	A	A	N	A	A	A	A	A	G	G	T	C	T	T	A	T	A	A	A	A	A	A	A	G	C	A	T
C	C	G	C	A	T	G	T	C	T	C	A	G	T	T	G	T	T	T	T	T	T	T	C	C	N	T	T	T	T	T	G	T	T	T	T	G	T	T	C	T	T	T	T	C	T	A	T	T	T
T	T	T	A	C	T	A	G	A	T	T	A	A	C	G	T	T	G	T	T	T	T	G	T	T	N	T	T	T	T	T	T	G	A	T	G	A	T	G	T	T	T	T	T	T	T	A	T	T	G
T	T	C	A	T	G	C	N	A	G	T	A	C	C	T	G	G	T	G	G	G	G	T	T	T	N	G	G	G	G	G	C	C	A	T	T	C	G	T	T	G	G	G	G	T	G	A	T	G	T
T	T	T	A	T	G	T	N	T	T	T	G	T	A	T	A	T	T	T	T	T	T	T	T	T	N	T	T	T	T	T	T	G	G	A	T	T	T	T	T	T	T	T	T	T	T	G	A	T	T
A	A	T	A	T	A	T	N	A	T	A	T	T	A	G	C	T	G	T	T	T	T	G	A	A	N	T	T	T	T	T	T	T	G	A	G	T	T	G	A	T	T	T	T	A	T	T	A	T	G
A	A	A	A	A	T	T	N	T	G	A	C	T	A	G	T	G	G	G	G	G	G	G	A	A	N	G	G	G	G	G	A	G	A	A	G	T	G	G	A	G	G	G	G	A	G	C	A	G	G
A	A	A	G	A	T	A	N	T	G	A	A	A	A	T	T	G	T	G	G	G	G	T	A	A	N	G	G	G	G	G	A	T	G	C	T	A	G	T	A	G	G	G	G	A	G	A	C	G	T
C	C	T	A	A	A	A	N	G	T	C	A	A	A	G	T	T	G	T	T	T	T	G	C	C	N	T	T	T	T	T	T	T	A	T	G	A	T	G	C	T	T	T	T	C	T	A	T	T	G
T	T	G	G	C	T	A	N	T	G	T	C	A	G	A	A	G	A	G	G	G	G	A	T	T	N	G	G	G	G	G	G	T	G	T	A	A	G	A	T	G	G	G	G	T	G	C	T	G	A
T	T	A	A	T	A	C	N	T	A	T	A	C	A	C	A	A	C	A	A	A	A	C	T	T	N	A	A	A	A	A	A	T	T	A	C	C	A	C	T	A	A	A	A	T	A	A	A	A	C
A	A	C	A	T	A	T	N	G	C	A	T	T	G	T	A	C	T	C	C	C	C	T	A	A	N	C	C	C	C	C	C	A	G	A	T	T	C	T	A	C	C	C	C	A	C	T	A	C	T
A	A	A	A	A	A	T	N	G	T	A	C	T	A	T	C	T	T	T	T	T	T	T	A	A	N	T	T	T	T	T	A	C	T	T	T	T	T	T	A	T	T	T	T	A	T	C	T	T	T
T	T	A	G	A	G	A	N	T	T	T	A	A	A	T	T	T	T	T	T	T	T	T	T	T	N	T	T	T	T	T	A	A	T	G	T	A	T	T	T	T	T	T	T	T	T	A	G	T	T
G	G	C	T	T	C	A	N	G	T	G	A	A	A	A	T	T	A	T	T	T	T	A	G	G	N	T	T	T	T	T	C	G	C	A	A	A	T	A	G	T	T	T	T	G	T	A	A	T	A
A	A	C	C	G	A	T	N	A	A	A	T	T	G	A	A	A	A	A	A	A	A	A	A	A	N	A	A	A	A	A	C	A	A	A	A	T	A	A	A	A	A	A	A	A	A	T	A	A	A
A	A	T	A	A	T	G	N	C	A	A	A	G	T	A	A	A	A	A	A	A	A	A	A	A	N	A	A	A	A	A	T	A	G	G	A	G	A	A	A	A	A	A	A	A	A	A	G	A	A
G	G	T	A	A	T	A	N	T	A	G	T	A	C	C	T	A	C	A	A	A	A	C	G	G	N	A	A	A	A	A	T	G	A	A	C	A	A	C	G	A	A	A	A	G	A	T	A	A	C
A	A	C	C	G	C	A	N	T	C	A	T	A	A	T	G	C	T	C	C	C	C	T	A	A	N	C	C	C	C	C	C	G	C	G	T	A	C	T	A	C	C	C	C	A	C	T	G	C	T
G	G	T	A	A	A	G	N	T	T	G	G	G	A	T	A	T	T	T	T	T	T	T	G	G	N	T	T	T	T	T	T	C	A	A	T	G	T	T	G	T	T	T	T	G	T	G	A	T	T
A	A	T	T	G	A	A	N	A	T	A	T	A	C	A	A	T	A	T	T	T	T	A	A	A	N	T	T	T	T	T	T	C	T	T	A	A	T	A	A	T	T	T	T	A	T	T	T	T	A
T	T	G	C	A	A	G	N	A	A	T	T	G	A	A	G	A	A	A	A	A	A	A	T	T	N	A	A	A	A	A	G	G	T	C	A	G	A	A	T	A	A	A	A	T	A	T	C	A	A
C	C	A	A	T	C	A	N	A	A	C	G	A	T	T	A	A	T	A	A	A	A	T	C	C	N	A	A	A	A	A	A	C	C	G	T	A	A	T	C	A	A	A	A	C	A	G	G	A	T
G	G	A	A	C	A	T	N	C	T	G	G	T	C	G	G	T	G	T	T	T	T	G	G	G	N	T	T	T	T	T	A	T	T	C	G	T	T	G	G	T	T	T	T	G	T	G	C	T	G
C	C	A	T	G	A	C	N	T	G	C	T	C	A	A	A	G	A	G	G	G	G	A	C	C	N	G	G	G	G	G	A	A	T	C	A	C	G	A	C	G	G	G	G	C	G	T	C	G	A
C	C	T	A	C	A	G	N	T	A	C	G	G	A	A	T	A	A	A	A	A	A	A	C	C	N	A	A	A	A	A	T	T	T	A	A	G	A	A	C	A	A	A	A	C	A	G	A	A	A
A	A	A	T	C	T	C	N	A	A	A	A	C	T	G	C	A	G	A	A	A	A	G	A	A	N	A	A	A	A	A	A	A	A	T	G	C	A	G	A	A	A	A	A	A	A	A	T	A	G
T	T	C	T	A	T	C	N	A	G	T	C	C	A	A	G	G	A	G	G	G	G	A	T	T	N	G	G	G	G	G	C	A	A	T	A	C	G	A	T	G	G	G	G	T	G	C	T	G	A
T	T	T	G	T	G	A	N	T	A	T	T	A	T	G	C	A	G	A	A	A	A	G	T	T	N	A	A	A	A	A	T	C	G	A	G	A	A	G	T	A	A	A	A	T	A	T	A	A	G
A	A	C	T	T	T	T	N	G	G	A	T	T	T	A	C	G	A	G	G	G	G	A	A	A	N	G	G	G	G	G	C	A	C	T	A	T	G	A	A	G	G	G	G	A	G	T	T	G	A
T	T	C	T	A	T	T	N	A	A	T	T	T	G	T	A	A	T	A	A	A	A	T	T	T	N	A	A	A	A	A	C	A	T	T	T	T	A	T	T	A	A	A	A	T	A	T	T	A	T
T	T	A	G	T	G	A	N	A	T	T	A	A	T	C	T	T	C	T	T	T	T	C	T	T	N	T	T	T	T	T	A	T	T	T	C	A	T	C	T	T	T	T	T	T	T	A	T	T	C
T	T	A	G	T	A	T	N	G	C	T	A	T	T	G	T	C	G	C	C	C	C	G	T	T	N	C	C	C	C	C	A	A	G	T	G	T	C	G	T	C	C	C	C	T	C	A	T	C	G
T	T	A	T	T	A	T	N	A	G	T	A	T	G	C	A	G	C	G	G	G	G	C	T	T	N	G	G	G	G	G	A	C	T	G	C	T	G	C	T	G	G	G	G	T	G	A	G	G	C
G	G	A	G	T	T	T	N	G	C	G	C	T	G	C	T	C	C	C	C	C	C	C	G	G	N	C	C	C	C	C	A	T	A	G	C	T	C	C	G	C	C	C	C	G	C	C	G	C	C
G	G	A	A	G	C	T	N	A	C	G	T	T	T	A	T	C	A	C	C	C	C	A	G	G	N	C	C	C	C	C	A	A	A	C	A	T	C	A	G	C	C	C	C	G	C	T	C	C	A
C	C	G	C	G	C	G	N	T	A	C	T	G	G	T	T	A	T	A	A	A	A	T	C	C	N	A	A	A	A	A	G	G	A	A	T	G	A	T	C	A	A	A	A	C	A	T	A	A	T
A	A	A	T	C	T	G	N	C	T	A	A	G	A	T	T	T	T	T	T	T	T	T	A	A	N	T	T	T	T	T	A	A	T	T	T	G	T	T	A	T	T	T	T	A	T	A	T	T	T
T	T	G	T	A	G	C	N	G	T	T	A	C	C	A	G	T	A	T	T	T	T	A	T	T	N	T	T	T	T	T	G	T	A	C	A	C	T	A	T	T	T	T	T	T	T	A	C	T	A
C	C	A	T	T	T	A	N	C	A	C	T	A	T	T	G	A	T	A	A	A	A	T	C	C	N	A	A	A	A	A	A	G	A	T	T	A	A	T	C	A	A	A	A	C	A	T	T	A	T
T	T	A	A	C	G	T	N	C	T	T	G	T	T	T	C	T	T	T	T	T	T	T	T	T	N	T	T	T	T	T	A	G	A	T	T	T	T	T	T	T	T	T	T	T	T	G	T	T	T
T	T	A	A	T	G	C	N	A	T	T	A	C	T	T	A	T	T	T	T	T	T	T	T	T	N	T	T	T	T	T	A	A	T	T	T	C	T	T	T	T	T	T	T	T	T	A	T	T	T
T	T	G	A	T	T	T	N	T	T	T	A	T	A	T	T	T	T	T	T	T	T	T	T	T	N	T	T	T	T	T	G	A	T	T	T	T	T	T	T	T	T	T	T	T	T	A	T	T	T
T	T	T	C	T	A	T	N	T	T	T	G	T	A	G	C	T	G	T	T	T	T	G	T	T	N	T	T	T	T	T	T	T	T	T	G	T	T	G	T	T	T	T	T	T	T	G	T	T	G
T	T	C	T	T	A	T	N	A	G	T	A	T	A	G	T	G	G	G	G	G	G	G	T	T	N	G	G	G	G	G	C	T	T	C	G	T	G	G	T	G	G	G	G	T	G	A	C	G	G
C	C	A	T	T	T	T	N	T	G	C	G	T	C	C	T	G	C	G	G	G	G	C	C	C	N	G	G	G	G	G	A	T	T	T	C	T	G	C	C	G	G	G	G	C	G	G	T	G	C
T	T	A	A	C	T	T	N	T	C	T	A	T	T	A	T	C	A	C	C	C	C	A	T	T	N	C	C	C	C	C	A	C	G	G	A	T	C	A	T	C	C	C	C	T	C	A	G	C	A
G	G	C	A	T	T	C	N	T	A	G	T	C	T	T	T	A	T	A	A	A	A	T	G	G	N	A	A	A	A	A	C	A	G	C	T	C	A	T	G	A	A	A	A	G	A	T	C	A	T
C	C	A	T	G	T	T	N	T	T	C	C	T	A	C	T	T	C	T	T	T	T	C	C	C	N	T	T	T	T	T	A	C	C	T	C	T	T	C	C	T	T	T	T	C	T	C	T	T	C
T	T	T	G	C	A	G	N	G	C	T	G	G	A	T	C	C	T	N	C	C	N	T	T	T	N	C	C	N	C	C	T	A	T	T	T	G	C	T	T	C	C	C	C	T	C	G	T	C	T
T	T	C	A	T	A	C	N	G	T	T	C	C	T	T	T	T	T	T	T	T	T	T	T	T	N	T	T	T	T	T	C	G	T	C	T	C	T	T	T	T	T	T	T	T	T	C	C	T	T
C	C	A	A	T	A	T	N	C	T	C	C	T	G	T	G	T	T	T	T	T	T	T	C	C	N	T	T	T	T	T	A	T	T	C	T	T	T	T	C	T	T	T	T	C	T	C	C	T	T
C	C	A	G	C	G	T	N	A	T	C	A	T	A	T	C	T	T	T	T	T	T	T	C	C	N	T	T	T	T	T	A	A	G	A	T	T	T	T	C	T	T	T	T	C	T	A	A	T	T
A	A	T	A	C	T	C	N	T	T	A	T	C	A	T	T	T	T	T	T	T	T	T	A	A	N	T	T	T	T	T	T	T	T	C	T	C	T	T	A	T	T	T	T	A	T	T	C	T	T
C	C	A	G	A	T	C	N	C	T	C	T	C	G	C	T	T	C	T	T	T	T	C	C	C	N	T	T	T	T	T	A	T	G	A	C	C	T	C	C	T	T	T	T	C	T	T	A	T	C
A	A	T	A	C	A	A	N	T	C	A	A	A	A	T	C	C	T	C	C	C	C	T	A	A	N	C	C	C	C	C	T	C	T	A	T	A	C	T	A	C	C	C	C	A	C	A	A	C	T
A	A	T	T	A	C	C	N	T	T	A	T	C	G	G	C	T	G	T	T	T	T	G	A	A	N	T	T	T	T	T	T	A	G	G	G	C	T	G	A	T	T	T	T	A	T	T	G	T	G
G	G	G	C	A	A	A	N	T	G	G	T	A	A	C	A	G	C	G	G	G	G	C	G	G	N	G	G	G	G	G	G	C	C	T	C	A	G	C	G	G	G	G	G	G	G	T	T	G	C
T	T	T	G	G	A	A	N	T	C	T	T	A	T	T	C	C	T	C	C	C	C	T	T	T	N	C	C	C	C	C	T	T	T	G	T	A	C	T	T	C	C	C	C	T	C	T	G	C	T
G	G	T	C	T	A	G	N	T	T	G	T	G	C	T	A	T	T	T	T	T	T	T	G	G	N	T	T	T	T	T	T	G	G	C	T	G	T	T	G	T	T	T	T	G	T	T	C	T	T
C	C	G	C	G	A	T	N	C	T	C	G	T	G	C	A	T	C	T	T	T	T	C	C	C	N	T	T	T	T	T	G	A	A	T	C	T	T	C	C	T	T	T	T	C	T	G	T	T	C
T	T	G	A	C	G	G	N	T	C	T	G	G	C	C	G	C	C	C	C	C	C	C	T	T	N	C	C	C	C	C	G	G	C	T	C	G	C	C	T	C	C	C	C	T	C	G	T	C	C
T	T	T	T	T	G	C	N	G	C	T	C	C	C	A	T	C	A	C	C	C	C	A	T	T	N	C	C	C	C	C	T	A	T	T	A	C	C	A	T	C	C	C	C	T	C	C	T	C	A
T	T	G	T	T	A	T	N	C	A	T	A	T	A	C	G	A	C	A	A	A	A	C	T	T	N	A	A	A	A	A	G	C	C	T	C	T	A	C	T	A	A	A	A	T	A	A	T	A	C
T	T	A	A	T	A	T	N	T	C	T	T	T	T	A	C	C	A	C	C	C	C	A	T	T	N	C	C	C	C	C	A	T	T	G	A	T	C	A	T	C	C	C	C	T	C	T	G	C	A
G	G	C	T	T	A	T	N	T	A	G	C	T	T	A	T	A	A	A	A	A	A	A	G	G	N	A	A	A	A	A	C	C	A	T	A	T	A	A	G	A	A	A	A	G	A	C	T	A	A
T	T	T	T	G	A	T	N	C	A	T	T	T	A	G	T	A	G	A	A	A	A	G	T	T	N	A	A	A	A	A	T	A	T	G	G	T	A	G	T	A	A	A	A	T	A	T	G	A	G
G	G	T	T	T	G	G	N	C	G	G	T	G	T	T	T	G	T	G	G	G	G	T	G	G	N	G	G	G	G	G	T	T	C	G	T	G	G	T	G	G	G	G	G	G	G	T	G	G	T
G	G	T	T	G	C	T	N	A	T	G	T	T	T	G	T	T	G	T	T	T	T	G	G	G	N	T	T	T	T	T	T	T	A	A	G	T	T	G	G	T	T	T	T	G	T	T	A	T	G
A	A	A	G	G	T	G	N	C	G	A	T	G	T	C	G	G	C	G	G	G	G	C	A	A	N	G	G	G	G	G	A	G	T	A	C	G	G	C	A	G	G	G	G	A	G	T	A	G	C
A	A	A	G	A	A	G	N	A	C	A	T	G	T	T	T	C	T	C	C	C	C	T	A	A	N	C	C	C	C	C	A	A	T	A	T	G	C	T	A	C	C	C	C	A	C	T	A	C	T
A	A	A	C	A	A	A	N	A	T	A	C	A	G	T	G	T	T	T	T	T	T	T	A	A	N	T	T	T	T	T	A	T	A	C	T	A	T	T	A	T	T	T	T	A	T	C	C	T	T
C	C	C	A	A	A	A	N	G	T	C	T	A	G	T	G	T	T	T	T	T	T	T	C	C	N	T	T	T	T	T	C	G	T	T	T	A	T	T	C	T	T	T	T	C	T	T	T	T	T
T	T	T	T	C	A	A	N	T	T	T	G	A	C	T	A	T	T	T	T	T	T	T	T	T	N	T	T	T	T	T	T	C	T	G	T	A	T	T	T	T	T	T	T	T	T	G	G	T	T
G	G	T	C	T	A	C	N	G	T	G	C	C	A	G	A	T	G	T	T	T	T	G	G	G	N	T	T	T	T	T	T	T	G	T	G	C	T	G	G	T	T	T	T	G	T	C	T	T	G
T	T	A	T	G	A	T	N	C	G	T	T	T	T	T	A	G	T	G	G	G	G	T	T	T	N	G	G	G	G	G	A	A	G	G	T	T	G	T	T	G	G	G	G	T	G	T	G	G	T
G	G	A	T	T	G	G	N	T	T	G	T	G	C	G	C	T	G	T	T	T	T	G	G	G	N	T	T	T	T	T	A	T	T	A	G	G	T	G	G	T	T	T	T	G	T	T	A	T	G
A	A	T	T	G	G	T	N	T	G	A	C	T	T	G	T	G	G	G	G	G	G	G	A	A	N	G	G	G	G	G	T	G	G	A	G	T	G	G	A	G	G	G	G	A	G	C	A	G	G
A	A	G	T	A	T	G	N	T	G	A	C	G	T	A	G	G	A	G	G	G	G	A	A	A	N	G	G	G	G	G	G	A	G	A	A	G	G	A	A	G	G	G	G	A	G	C	A	G	A
A	A	A	T	A	G	A	N	T	A	A	A	A	T	A	T	A	A	A	A	A	A	A	A	A	N	A	A	A	A	A	A	T	A	G	A	A	A	A	A	A	A	A	A	A	A	A	G	A	A
G	G	A	C	A	C	A	N	G	A	G	C	A	T	A	G	A	A	A	A	A	A	A	G	G	N	A	A	A	A	A	A	G	G	G	A	A	A	A	G	A	A	A	A	G	A	C	G	A	A
G	G	G	T	G	C	A	N	T	A	G	A	A	T	C	A	A	C	A	A	A	A	C	G	G	N	A	A	A	A	A	G	T	C	T	C	A	A	C	G	A	A	A	A	G	A	A	T	A	C
T	T	A	G	G	T	G	N	G	C	T	A	G	C	T	A	C	T	C	C	C	C	T	T	T	N	C	C	C	C	C	A	T	T	T	T	G	C	T	T	C	C	C	C	T	C	A	T	C	T
T	T	G	C	T	G	G	N	G	T	T	G	G	T	G	A	T	G	T	T	T	T	G	T	T	N	T	T	T	T	T	G	C	A	T	G	G	T	G	T	T	T	T	T	T	T	G	T	T	G
T	T	A	T	T	G	T	N	A	G	T	T	T	G	T	G	G	T	G	G	G	G	T	T	T	N	G	G	G	G	G	A	A	A	G	T	T	G	T	T	G	G	G	G	T	G	T	G	G	T
G	G	T	T	T	A	T	N	A	T	G	G	T	C	G	G	T	G	T	T	T	T	G	G	G	N	T	T	T	T	T	T	C	A	G	G	T	T	G	G	T	T	T	T	G	T	G	G	T	G
G	G	C	C	G	A	T	N	A	G	G	C	T	T	A	T	G	A	G	G	G	G	A	G	G	N	G	G	G	G	G	C	A	C	A	A	T	G	A	G	G	G	G	G	G	G	C	A	G	A
A	A	G	C	G	T	G	N	C	A	A	T	G	T	A	T	A	A	A	A	A	A	A	A	A	N	A	A	A	A	A	G	T	T	T	A	G	A	A	A	A	A	A	A	A	A	T	T	A	A
T	T	C	A	A	A	G	N	T	A	T	T	G	C	A	T	A	A	A	A	A	A	A	T	T	N	A	A	A	A	A	C	C	T	T	A	G	A	A	T	A	A	A	A	T	A	T	T	A	A
T	T	C	C	T	T	A	N	G	A	T	T	A	C	G	G	A	G	A	A	A	A	G	T	T	N	A	A	A	A	A	C	T	A	A	G	A	A	G	T	A	A	A	A	T	A	T	A	A	G
A	A	A	A	T	T	T	N	T	G	A	T	T	A	G	G	G	G	G	G	G	G	G	A	A	N	G	G	G	G	G	A	G	A	T	G	T	G	G	A	G	G	G	G	A	G	T	T	G	G
T	T	T	A	A	G	T	N	G	G	T	G	T	C	T	A	G	T	G	G	G	G	T	T	T	N	G	G	G	G	G	T	A	A	A	T	T	G	T	T	G	G	G	G	T	G	G	A	G	T
A	A	T	G	T	G	A	N	A	T	A	T	A	A	T	T	T	T	T	T	T	T	T	A	A	N	T	T	T	T	T	T	T	G	A	T	A	T	T	A	T	T	T	T	A	T	T	A	T	T
A	A	A	T	A	T	T	N	A	T	A	G	T	A	T	T	T	T	T	T	T	T	T	A	A	N	T	T	T	T	T	A	T	C	A	T	T	T	T	A	T	T	T	T	A	T	G	A	T	T
A	A	T	G	A	G	A	N	A	T	A	G	A	G	G	A	T	G	T	T	T	T	G	A	A	N	T	T	T	T	T	T	T	C	G	G	A	T	G	A	T	T	T	T	A	T	G	G	T	G
G	G	T	C	A	A	A	N	G	G	G	A	A	T	G	T	G	G	G	G	G	G	G	G	G	N	G	G	G	G	G	T	G	T	C	G	A	G	G	G	G	G	G	G	G	G	A	C	G	G
C	C	T	T	G	A	A	N	G	G	C	A	A	G	A	A	G	A	G	G	G	G	A	C	C	N	G	G	G	G	G	T	G	T	A	A	A	G	A	C	G	G	G	G	C	G	A	A	G	A
A	A	T	T	C	C	G	N	T	A	A	A	G	C	T	A	A	T	A	A	A	A	T	A	A	N	A	A	A	A	A	T	C	G	T	T	G	A	T	A	A	A	A	A	A	A	A	T	A	T
T	T	G	T	A	A	C	N	T	T	T	C	C	T	T	A	T	T	T	T	T	T	T	T	T	N	T	T	T	T	T	G	T	A	T	T	C	T	T	T	T	T	T	T	T	T	C	T	T	T
T	T	G	T	T	G	A	N	T	T	T	T	A	T	A	G	T	A	T	T	T	T	A	T	T	N	T	T	T	T	T	G	A	A	C	A	A	T	A	T	T	T	T	T	T	T	T	C	T	A
C	C	C	G	T	A	T	N	G	A	C	G	T	T	T	C	A	T	A	A	A	A	T	C	C	N	A	A	A	A	A	C	C	T	A	T	T	A	T	C	A	A	A	A	C	A	G	A	A	T
A	A	A	T	C	A	T	N	G	T	A	T	T	T	A	A	T	A	T	T	T	T	A	A	A	N	T	T	T	T	T	A	T	T	A	A	T	T	A	A	T	T	T	T	A	T	T	A	T	A
A	A	T	G	A	A	C	N	A	A	A	G	C	G	A	T	A	A	A	A	A	A	A	A	A	N	A	A	A	A	A	T	A	T	A	A	C	A	A	A	A	A	A	A	A	A	G	A	A	A
A	A	C	G	A	T	A	N	T	A	A	A	A	T	A	T	A	A	A	A	A	A	A	A	A	N	A	A	A	A	A	C	A	A	C	A	A	A	A	A	A	A	A	A	A	A	A	C	A	A
C	C	T	A	A	C	A	N	T	A	C	A	A	G	G	C	A	G	A	A	A	A	G	C	C	N	A	A	A	A	A	T	C	G	A	G	A	A	G	C	A	A	A	A	C	A	A	A	A	G
A	A	T	A	C	A	A	N	A	G	A	A	A	G	C	A	G	C	G	G	G	G	C	A	A	N	G	G	G	G	G	T	A	G	A	C	A	G	C	A	G	G	G	G	A	G	A	A	G	C
A	A	T	A	A	A	C	N	T	C	A	G	C	A	A	A	C	A	C	C	C	C	A	A	A	N	C	C	C	C	C	T	A	T	A	A	C	C	A	A	C	C	C	C	A	C	G	A	C	A
A	A	T	C	A	T	A	N	A	A	A	G	A	A	T	A	A	T	A	A	A	A	T	A	A	N	A	A	A	A	A	T	T	G	T	T	A	A	T	A	A	A	A	A	A	A	G	T	A	T
T	T	T	T	A	A	A	N	A	T	T	T	A	A	T	C	T	T	T	T	T	T	T	T	T	N	T	T	T	T	T	T	C	A	T	T	A	T	T	T	T	T	T	T	T	T	T	T	T	T
T	T	C	G	T	C	A	N	A	T	T	T	A	C	C	A	T	C	T	T	T	T	C	T	T	N	T	T	T	T	T	C	T	A	G	C	A	T	C	T	T	T	T	T	T	T	T	G	T	C
G	G	T	T	T	T	T	N	G	C	G	T	T	T	A	A	C	A	C	C	C	C	A	G	G	N	C	C	C	C	C	T	A	A	T	A	T	C	A	G	C	C	C	C	G	C	T	T	C	A
T	T	G	G	G	G	T	N	C	A	T	G	T	G	A	A	A	A	A	A	A	A	A	T	T	N	A	A	A	A	A	G	G	C	T	A	T	A	A	T	A	A	A	A	T	A	G	T	A	A
T	T	C	A	T	A	G	N	A	A	T	G	G	T	A	T	A	A	A	A	A	A	A	T	T	N	A	A	A	A	A	C	T	A	G	A	G	A	A	T	A	A	A	A	T	A	G	G	A	A
G	G	T	A	T	G	T	N	T	A	G	A	T	G	C	T	A	C	A	A	A	A	C	G	G	N	A	A	A	A	A	T	T	T	A	C	T	A	C	G	A	A	A	A	G	A	A	A	A	C
A	A	T	A	G	T	T	N	T	C	A	T	T	A	A	G	C	A	C	C	C	C	A	A	A	N	C	C	C	C	C	T	G	T	A	A	T	C	A	A	C	C	C	C	A	C	T	A	C	A
A	A	C	G	A	C	G	N	C	A	A	T	G	A	A	T	A	A	A	A	A	A	A	A	A	N	A	A	A	A	A	C	T	T	T	A	G	A	A	A	A	A	A	A	A	A	T	T	A	A
T	T	C	G	A	C	A	N	A	A	T	A	A	A	A	T	A	A	A	A	A	A	A	T	T	N	A	A	A	A	A	C	A	G	C	A	A	A	A	T	A	A	A	A	T	A	A	C	A	A
C	C	A	T	T	T	A	N	A	A	C	T	A	G	T	G	A	T	A	A	A	A	T	C	C	N	A	A	A	A	A	A	A	T	C	T	A	A	T	C	A	A	A	A	C	A	T	C	A	T
C	C	C	T	C	C	T	N	A	T	C	A	T	G	T	A	T	T	T	T	T	T	T	C	C	N	T	T	T	T	T	C	T	C	T	T	T	T	T	C	T	T	T	T	C	T	A	T	T	T
T	T	A	T	C	T	C	N	C	T	T	A	C	T	G	A	T	G	T	T	T	T	G	T	T	N	T	T	T	T	T	A	G	A	G	G	C	T	G	T	T	T	T	T	T	T	A	G	T	G
G	G	A	G	T	T	C	N	A	G	G	A	C	T	T	T	G	T	G	G	G	G	T	G	G	N	G	G	G	G	G	A	G	C	T	T	C	G	T	G	G	G	G	G	G	G	A	T	G	T
T	T	G	G	G	T	T	N	A	T	T	G	T	T	T	C	T	T	T	T	T	T	T	T	T	N	T	T	T	T	T	G	C	G	G	T	T	T	T	T	T	T	T	T	T	T	G	G	T	T
G	G	T	A	T	A	G	N	A	T	G	C	G	G	G	C	T	G	T	T	T	T	G	G	G	N	T	T	T	T	T	T	C	C	G	G	G	T	G	G	T	T	T	T	G	T	C	G	T	G
G	G	G	T	G	T	T	N	T	G	G	A	T	G	A	T	G	A	G	G	G	G	A	G	G	N	G	G	G	G	G	G	T	A	T	A	T	G	A	G	G	G	G	G	G	G	A	T	G	A
T	T	C	T	G	G	G	N	T	A	T	T	G	A	A	G	A	A	A	A	A	A	A	T	T	N	A	A	A	A	A	C	A	C	A	A	G	A	A	T	A	A	A	A	T	A	T	A	A	A
A	A	T	A	T	C	G	N	G	A	A	T	G	T	T	T	A	T	A	A	A	A	T	A	A	N	A	A	A	A	A	T	C	T	A	T	G	A	T	A	A	A	A	A	A	A	T	A	A	T
A	A	T	T	A	A	T	N	T	T	A	C	T	T	C	G	T	C	T	T	T	T	C	A	A	N	T	T	T	T	T	T	A	C	T	C	T	T	C	A	T	T	T	T	A	T	C	T	T	C
T	T	T	A	A	T	A	N	T	C	T	A	A	A	C	G	C	C	C	C	C	C	C	T	T	N	C	C	C	C	C	T	T	A	T	C	A	C	C	T	C	C	C	C	T	C	A	T	C	C
T	T	T	A	T	T	A	N	G	C	T	A	A	T	T	T	C	T	C	C	C	C	T	T	T	N	C	C	C	C	C	T	T	A	T	T	A	C	T	T	C	C	C	C	T	C	A	T	C	T
T	T	G	A	T	T	T	N	A	T	T	A	T	A	G	A	T	G	T	T	T	T	G	T	T	N	T	T	T	T	T	G	A	A	T	G	T	T	G	T	T	T	T	T	T	T	A	T	T	G
T	T	T	G	T	G	T	N	A	G	T	C	T	A	T	A	G	T	G	G	G	G	T	T	T	N	G	G	G	G	G	T	C	G	A	T	T	G	T	T	G	G	G	G	T	G	C	A	G	T
A	A	G	C	T	C	T	N	T	T	A	A	T	A	G	T	T	G	T	T	T	T	G	A	A	N	T	T	T	T	T	G	A	G	A	G	T	T	G	A	T	T	T	T	A	T	A	A	T	G
A	A	G	A	A	A	T	N	C	G	A	A	T	G	G	T	G	G	G	G	G	G	G	A	A	N	G	G	G	G	G	G	G	G	A	G	T	G	G	A	G	G	G	G	A	G	A	A	G	G
A	A	A	T	A	T	A	N	C	G	A	A	A	C	T	T	G	T	G	G	G	G	T	A	A	N	G	G	G	G	G	A	G	A	G	T	A	G	T	A	G	G	G	G	A	G	A	G	G	T
G	G	A	T	A	C	A	N	T	T	G	T	A	A	A	T	T	A	T	T	T	T	A	G	G	N	T	T	T	T	T	A	T	T	T	A	A	T	A	G	T	T	T	T	G	T	T	T	T	A
T	T	A	C	G	A	A	N	G	A	T	T	A	T	A	A	A	A	A	A	A	A	A	T	T	N	A	A	A	A	A	A	G	T	T	A	A	A	A	T	A	A	A	A	T	A	T	T	A	A
T	T	C	A	T	G	G	N	T	A	T	G	G	T	T	A	A	T	A	A	A	A	T	T	T	N	A	A	A	A	A	C	G	G	A	T	G	A	T	T	A	A	A	A	T	A	G	A	A	T
A	A	T	A	T	A	T	N	G	T	A	T	T	C	T	A	T	T	T	T	T	T	T	A	A	N	T	T	T	T	T	T	T	T	C	T	T	T	T	A	T	T	T	T	A	T	T	C	T	T
C	C	G	A	A	G	T	N	G	T	C	T	T	A	T	G	T	T	T	T	T	T	T	C	C	N	T	T	T	T	T	G	G	A	A	T	T	T	T	C	T	T	T	T	C	T	T	A	T	T
A	A	T	C	C	G	A	N	T	T	A	G	A	A	T	T	T	T	T	T	T	T	T	A	A	N	T	T	T	T	T	T	T	C	A	T	A	T	T	A	T	T	T	T	A	T	G	A	T	T
A	A	G	A	A	C	C	N	A	T	A	A	C	A	A	T	T	A	T	T	T	T	A	A	A	N	T	T	T	T	T	G	T	A	A	A	C	T	A	A	T	T	T	T	A	T	A	A	T	A
A	A	A	A	A	T	A	N	A	A	A	A	A	C	A	A	A	A	A	A	A	A	A	A	A	N	A	A	A	A	A	A	G	G	A	A	A	A	A	A	A	A	A	A	A	A	A	A	A	A
A	A	A	A	A	G	A	N	T	A	A	T	A	A	A	C	A	A	A	A	A	A	A	A	A	N	A	A	A	A	A	A	T	A	G	A	A	A	A	A	A	A	A	A	A	A	T	G	A	A
G	G	A	T	A	C	A	N	T	A	G	C	A	A	G	A	A	G	A	A	A	A	G	G	G	N	A	A	A	A	A	A	T	A	G	G	A	A	G	G	A	A	A	A	G	A	C	G	A	G
G	G	G	T	G	T	A	N	T	G	G	C	A	A	T	A	G	T	G	G	G	G	T	G	G	N	G	G	G	G	G	G	C	A	A	T	A	G	T	G	G	G	G	G	G	G	C	A	G	T
A	A	G	G	G	C	G	N	T	T	A	T	G	T	T	A	T	T	T	T	T	T	T	A	A	N	T	T	T	T	T	G	A	G	A	T	G	T	T	A	T	T	T	T	A	T	T	A	T	T
A	A	T	T	A	G	G	N	A	T	A	G	G	T	A	A	T	A	T	T	T	T	A	A	A	N	T	T	T	T	T	T	G	T	A	A	G	T	A	A	T	T	T	T	A	T	G	A	T	A
A	A	T	T	A	T	A	N	A	A	A	T	A	G	C	G	A	C	A	A	A	A	C	A	A	N	A	A	A	A	A	T	T	G	A	C	A	A	C	A	A	A	A	A	A	A	T	A	A	C
A	A	T	G	A	G	A	N	A	C	A	G	A	T	A	G	C	A	C	C	C	C	A	A	A	N	C	C	C	C	C	T	T	T	G	A	A	C	A	A	C	C	C	C	A	C	G	G	C	A
G	G	G	A	A	T	A	N	G	A	G	G	A	T	A	A	A	A	A	A	A	A	A	G	G	N	A	A	A	A	A	G	G	G	C	A	A	A	A	G	A	A	A	A	G	A	G	C	A	A
C	C	G	A	G	T	A	N	T	A	C	T	A	G	A	A	A	A	A	A	A	A	A	C	C	N	A	A	A	A	A	G	A	T	T	A	A	A	A	C	A	A	A	A	C	A	T	T	A	A
T	T	A	T	C	G	G	N	T	A	T	A	G	A	A	A	A	A	A	A	A	A	A	T	T	N	A	A	A	A	A	A	C	T	A	A	G	A	A	T	A	A	A	A	T	A	A	A	A	A
A	A	T	C	T	T	C	N	A	A	A	A	C	A	G	A	A	G	A	A	A	A	G	A	A	N	A	A	A	A	A	T	T	A	A	G	C	A	G	A	A	A	A	A	A	A	A	A	A	G
A	A	T	C	A	A	T	N	C	G	A	T	T	T	G	G	G	G	G	G	G	G	G	A	A	N	G	G	G	G	G	T	T	A	A	G	T	G	G	A	G	G	G	G	A	G	T	A	G	G
A	A	A	T	A	C	A	N	A	G	A	T	A	C	A	C	G	A	G	G	G	G	A	A	A	N	G	G	G	G	G	A	C	A	A	A	A	G	A	A	G	G	G	G	A	G	T	A	G	A
A	A	T	G	A	G	A	N	A	A	A	T	A	C	A	T	A	A	A	A	A	A	A	A	A	N	A	A	A	A	A	T	G	T	A	A	A	A	A	A	A	A	A	A	A	A	T	A	A	A
A	A	A	T	A	A	A	N	A	A	A	T	A	T	A	A	A	A	A	A	A	A	A	A	A	N	A	A	A	A	A	A	C	C	A	A	A	A	A	A	A	A	A	A	A	A	T	A	A	A
A	A	A	G	A	T	A	N	A	A	A	A	A	G	A	A	A	A	A	A	A	A	A	A	A	N	A	A	A	A	A	A	A	C	G	A	A	A	A	A	A	A	A	A	A	A	A	G	A	A
G	G	A	G	A	C	A	N	G	A	G	A	A	T	G	A	A	G	A	A	A	A	G	G	G	N	A	A	A	A	A	A	G	A	G	G	A	A	G	G	A	A	A	A	G	A	A	G	A	G
G	G	G	T	G	A	A	N	G	G	G	A	A	G	C	A	G	C	G	G	G	G	C	G	G	N	G	G	G	G	G	G	T	G	T	C	A	G	C	G	G	G	G	G	G	G	A	T	G	C
T	T	C	A	G	A	G	N	A	C	T	G	G	G	T	A	C	T	C	C	C	C	T	T	T	N	C	C	C	C	C	C	G	A	G	T	G	C	T	T	C	C	C	C	T	C	G	G	C	T
G	G	A	A	T	T	G	N	A	T	G	T	G	T	A	A	T	A	T	T	T	T	A	G	G	N	T	T	T	T	T	A	G	G	C	A	G	T	A	G	T	T	T	T	G	T	T	C	T	A
C	C	T	T	G	T	T	N	A	A	C	T	T	A	A	G	A	A	A	A	A	A	A	C	C	N	A	A	A	A	A	T	C	A	C	A	T	A	A	C	A	A	A	A	C	A	T	C	A	A
C	C	T	T	C	T	G	N	A	A	C	A	G	A	A	G	A	A	A	A	A	A	A	C	C	N	A	A	A	A	A	T	T	A	T	A	G	A	A	C	A	A	A	A	C	A	A	T	A	A
T	T	C	T	C	T	C	N	G	A	T	C	C	T	A	T	A	A	A	A	A	A	A	T	T	N	A	A	A	A	A	C	A	G	G	A	C	A	A	T	A	A	A	A	T	A	C	G	A	A
G	G	A	T	T	C	C	N	C	A	G	A	C	T	A	G	A	A	A	A	A	A	A	G	G	N	A	A	A	A	A	A	A	A	G	A	C	A	A	G	A	A	A	A	G	A	A	G	A	A
G	G	A	A	G	T	T	N	T	A	G	A	T	T	A	C	A	A	A	A	A	A	A	G	G	N	A	A	A	A	A	A	C	A	A	A	T	A	A	G	A	A	A	A	G	A	A	A	A	A
A	A	A	A	G	C	G	N	A	A	A	A	G	T	G	C	A	G	A	A	A	A	G	A	A	N	A	A	A	A	A	A	T	A	A	G	G	A	G	A	A	A	A	A	A	A	A	A	A	G
A	A	C	A	A	C	G	N	A	G	A	A	G	A	G	T	G	G	G	G	G	G	G	A	A	N	G	G	G	G	G	C	A	C	T	G	G	G	G	A	G	G	G	G	A	G	A	T	G	G
T	T	A	G	A	C	A	N	A	G	T	G	A	A	T	G	G	T	G	G	G	G	T	T	T	N	G	G	G	G	G	A	A	T	A	T	A	G	T	T	G	G	G	G	T	G	G	A	G	T
A	A	A	T	T	G	A	N	A	T	A	G	A	A	G	G	T	G	T	T	T	T	G	A	A	N	T	T	T	T	T	A	C	G	T	G	A	T	G	A	T	T	T	T	A	T	G	T	T	G
T	T	A	T	A	C	T	N	A	G	T	A	T	G	C	A	G	C	G	G	G	G	C	T	T	N	G	G	G	G	G	A	A	G	T	C	T	G	C	T	G	G	G	G	T	G	A	T	G	C
T	T	T	A	T	A	A	N	A	C	T	A	A	T	C	A	C	C	C	C	C	C	C	T	T	N	C	C	C	C	C	T	T	C	G	C	A	C	C	T	C	C	C	C	T	C	A	G	C	C
G	G	T	C	T	C	T	N	G	C	G	A	T	T	T	T	C	T	C	C	C	C	T	G	G	N	C	C	C	C	C	T	C	C	G	T	T	C	T	G	C	C	C	C	G	C	A	G	C	T
G	G	G	A	G	T	T	N	G	T	G	A	T	A	G	A	T	G	T	T	T	T	G	G	G	N	T	T	T	T	T	G	T	T	T	G	T	T	G	G	T	T	T	T	G	T	A	T	T	G
T	T	T	A	G	C	G	N	T	G	T	G	G	C	G	T	G	G	G	G	G	G	G	T	T	N	G	G	G	G	G	T	T	A	G	G	G	G	G	T	G	G	G	G	T	G	G	G	G	G
G	G	T	A	T	T	G	N	G	G	G	C	G	A	A	T	G	A	G	G	G	G	A	G	G	N	G	G	G	G	G	T	T	C	A	A	G	G	A	G	G	G	G	G	G	G	C	A	G	A
A	A	G	A	G	T	T	N	C	A	A	T	T	A	A	G	A	A	A	A	A	A	A	A	A	N	A	A	A	A	A	G	G	T	A	A	T	A	A	A	A	A	A	A	A	A	T	A	A	A
A	A	A	G	A	G	G	N	C	A	A	A	G	A	T	G	A	T	A	A	A	A	T	A	A	N	A	A	A	A	A	A	G	C	C	T	G	A	T	A	A	A	A	A	A	A	A	C	A	T
C	C	A	G	A	A	A	N	T	T	C	A	A	A	A	T	T	A	T	T	T	T	A	C	C	N	T	T	T	T	T	A	C	A	A	A	A	T	A	C	T	T	T	T	C	T	A	A	T	A
A	A	T	A	C	A	A	N	G	A	A	A	A	G	T	G	A	T	A	A	A	A	T	A	A	N	A	A	A	A	A	T	A	T	G	T	A	A	T	A	A	A	A	A	A	A	A	G	A	T
G	G	C	A	A	A	C	N	G	T	G	A	C	G	T	A	T	T	T	T	T	T	T	G	G	N	T	T	T	T	T	C	C	G	A	T	C	T	T	G	T	T	T	T	G	T	A	A	T	T
A	A	C	A	G	C	A	N	A	T	A	A	A	A	G	A	T	G	T	T	T	T	G	A	A	N	T	T	T	T	T	C	T	C	A	G	A	T	G	A	T	T	T	T	A	T	A	A	T	G
A	A	T	A	A	T	G	N	A	G	A	A	G	A	G	C	G	G	G	G	G	G	G	A	A	N	G	G	G	G	G	T	G	C	A	G	G	G	G	A	G	G	G	G	A	G	A	A	G	G
A	A	G	G	A	G	A	N	T	G	A	G	A	A	T	A	G	T	G	G	G	G	T	A	A	N	G	G	G	G	G	G	T	T	T	T	A	G	T	A	G	G	G	G	A	G	G	T	G	T
T	T	T	C	A	C	A	N	A	T	T	G	A	A	G	G	T	G	T	T	T	T	G	T	T	N	T	T	T	T	T	T	T	C	C	G	A	T	G	T	T	T	T	T	T	T	G	C	T	G
C	C	G	T	T	T	A	N	T	G	C	T	A	G	A	A	G	A	G	G	G	G	A	C	C	N	G	G	G	G	G	G	T	T	A	A	A	G	A	C	G	G	G	G	C	G	T	A	G	A
A	A	G	A	C	C	T	N	T	A	A	G	T	C	A	A	A	A	A	A	A	A	A	A	A	N	A	A	A	A	A	G	A	A	A	A	T	A	A	A	A	A	A	A	A	A	G	A	A	A
A	A	T	A	A	A	C	N	G	A	A	C	C	T	C	A	A	C	A	A	A	A	C	A	A	N	A	A	A	A	A	T	T	A	T	C	C	A	C	A	A	A	A	A	A	A	C	T	A	C
T	T	A	A	A	A	A	N	G	C	T	C	A	A	A	T	C	A	C	C	C	C	A	T	T	N	C	C	C	C	C	A	G	A	A	A	A	C	A	T	C	C	C	C	T	C	C	A	C	A
A	A	A	A	T	A	A	N	T	A	A	T	A	A	G	C	A	G	A	A	A	A	G	A	A	N	A	A	A	A	A	A	A	A	C	G	A	A	G	A	A	A	A	A	A	A	T	C	A	G
C	C	T	A	A	A	T	N	G	G	C	G	T	A	A	A	G	A	G	G	G	G	A	C	C	N	G	G	G	G	G	T	A	G	T	A	T	G	A	C	G	G	G	G	C	G	G	T	G	A
T	T	T	A	C	T	A	N	A	A	T	G	A	A	A	A	A	A	A	A	A	A	A	T	T	N	A	A	A	A	A	T	A	C	G	A	A	A	A	T	A	A	A	A	T	A	G	G	A	A
G	G	T	G	T	T	C	N	A	A	G	A	C	A	A	T	A	A	A	A	A	A	A	G	G	N	A	A	A	A	A	T	A	C	A	A	C	A	A	G	A	A	A	A	G	A	A	A	A	A
A	A	T	G	G	C	T	N	C	A	A	A	T	A	T	A	A	T	A	A	A	A	T	A	A	N	A	A	A	A	A	T	A	C	G	T	T	A	T	A	A	A	A	A	A	A	A	G	A	T
G	G	A	T	A	T	G	N	A	T	G	T	G	G	C	C	T	C	T	T	T	T	C	G	G	N	T	T	T	T	T	A	C	C	T	C	G	T	C	G	T	T	T	T	G	T	T	T	T	C
T	T	A	G	G	G	A	N	G	C	T	A	A	G	A	T	C	A	C	C	C	C	A	T	T	N	C	C	C	C	C	A	T	A	C	A	A	C	A	T	C	C	C	C	T	C	A	C	C	A
C	C	A	C	T	T	G	N	A	A	C	T	G	T	A	G	A	A	A	A	A	A	A	C	C	N	A	A	A	A	A	A	C	A	C	A	G	A	A	C	A	A	A	A	C	A	T	C	A	A
C	C	G	C	C	G	T	N	A	A	C	T	T	G	T	A	A	T	A	A	A	A	T	C	C	N	A	A	A	A	A	G	A	A	T	T	T	A	T	C	A	A	A	A	C	A	T	T	A	T
T	T	T	T	C	C	C	N	A	T	T	G	C	C	A	G	T	A	T	T	T	T	A	T	T	N	T	T	T	T	T	T	A	A	C	A	C	T	A	T	T	T	T	T	T	T	G	C	T	A
C	C	T	G	T	G	C	N	T	A	C	G	C	C	C	T	A	C	A	A	A	A	C	C	C	N	A	A	A	A	A	T	A	G	T	C	C	A	C	C	A	A	A	A	C	A	G	T	A	C
T	T	A	G	C	T	T	N	C	C	T	T	T	T	T	C	C	T	C	C	C	C	T	T	T	N	C	C	C	C	C	A	C	A	T	T	T	C	T	T	C	C	C	C	T	C	T	T	C	T
T	T	C	A	T	G	C	N	A	T	T	G	C	G	G	C	T	G	T	T	T	T	G	T	T	N	T	T	T	T	T	C	C	A	T	G	C	T	G	T	T	T	T	T	T	T	G	T	T	G
T	T	A	A	T	T	T	N	A	G	T	A	T	G	A	T	G	A	G	G	G	G	A	T	T	N	G	G	G	G	G	A	C	A	A	A	T	G	A	T	G	G	G	G	T	G	A	A	G	A
A	A	A	T	T	T	T	N	T	A	A	A	T	A	G	C	A	G	A	A	A	A	G	A	A	N	A	A	A	A	A	A	G	T	T	G	T	A	G	A	A	A	A	A	A	A	A	T	A	G
T	T	A	A	A	T	T	N	A	G	T	C	T	A	T	T	G	T	G	G	G	G	T	T	T	N	G	G	G	G	G	A	T	T	G	T	T	G	T	T	G	G	G	G	T	G	C	G	G	T
G	G	A	T	T	T	A	N	C	T	G	A	A	T	C	T	T	C	T	T	T	T	C	G	G	N	T	T	T	T	T	A	C	A	C	C	A	T	C	G	T	T	T	T	G	T	A	C	T	C
C	C	G	T	G	A	T	N	T	C	C	G	T	A	C	T	C	C	C	C	C	C	C	C	C	N	C	C	C	C	C	G	C	T	A	C	T	C	C	C	C	C	C	C	C	C	G	A	C	C
A	A	G	G	C	C	G	N	G	C	A	A	G	T	T	A	C	T	C	C	C	C	T	A	A	N	C	C	C	C	C	G	T	C	T	T	G	C	T	A	C	C	C	C	A	C	A	T	C	T
T	T	A	G	A	A	C	N	A	T	T	A	C	T	C	T	T	C	T	T	T	T	C	T	T	N	T	T	T	T	T	A	T	T	T	C	C	T	C	T	T	T	T	T	T	T	A	T	T	C
T	T	A	T	T	G	A	N	G	C	T	A	A	G	T	G	C	T	C	C	C	C	T	T	T	N	C	C	C	C	C	A	G	T	T	T	A	C	T	T	C	C	C	C	T	C	A	T	C	T
T	T	A	G	T	A	T	N	T	T	T	T	T	G	T	C	T	T	T	T	T	T	T	T	T	N	T	T	T	T	T	A	A	C	G	T	T	T	T	T	T	T	T	T	T	T	T	G	T	T
G	G	A	A	T	A	T	N	C	T	G	C	T	T	T	A	T	T	T	T	T	T	T	G	G	N	T	T	T	T	T	A	T	T	C	T	T	T	T	G	T	T	T	T	G	T	C	C	T	T
C	C	G	A	G	G	T	N	C	T	C	A	T	G	A	T	T	A	T	T	T	T	A	C	C	N	T	T	T	T	T	G	T	T	A	A	T	T	A	C	T	T	T	T	C	T	A	A	T	A
A	A	C	C	C	G	G	N	T	A	A	A	G	A	T	T	A	T	A	A	A	A	T	A	A	N	A	A	A	A	A	C	G	A	T	T	G	A	T	A	A	A	A	A	A	A	A	T	A	T
T	T	T	A	A	C	C	N	C	T	T	T	C	A	G	T	T	G	T	T	T	T	G	T	T	N	T	T	T	T	T	T	G	G	C	G	C	T	G	T	T	T	T	T	T	T	T	C	T	G
C	C	A	G	T	C	A	N	T	G	C	A	A	C	C	G	G	C	G	G	G	G	C	C	C	N	G	G	G	G	G	A	C	A	A	C	A	G	C	C	G	G	G	G	C	G	A	A	G	C
A	A	A	A	C	G	T	N	T	C	A	C	T	A	A	C	C	A	C	C	C	C	A	A	A	N	C	C	C	C	C	A	T	G	G	A	T	C	A	A	C	C	C	C	A	C	C	G	C	A
G	G	A	A	A	C	C	N	T	A	G	T	C	G	T	A	A	T	A	A	A	A	T	G	G	N	A	A	A	A	A	A	T	G	A	T	C	A	T	G	A	A	A	A	G	A	T	A	A	T
A	A	A	A	G	T	A	N	A	T	A	G	A	A	T	T	T	T	T	T	T	T	T	A	A	N	T	T	T	T	T	A	G	G	G	T	A	T	T	A	T	T	T	T	A	T	G	G	T	T
G	G	A	T	A	A	G	N	T	T	G	A	G	A	T	C	T	T	T	T	T	T	T	G	G	N	T	T	T	T	T	A	A	A	G	T	G	T	T	G	T	T	T	T	G	T	A	G	T	T
G	G	A	C	G	T	A	N	G	T	G	G	A	A	G	A	T	G	T	T	T	T	G	G	G	N	T	T	T	T	T	A	A	G	C	G	A	T	G	G	T	T	T	T	G	T	G	C	T	G
C	C	G	A	G	A	G	N	C	G	C	T	G	T	C	G	G	C	G	G	G	G	C	C	C	N	G	G	G	G	G	G	G	A	T	C	G	G	C	C	G	G	G	G	C	G	T	T	G	C
T	T	G	A	C	A	G	N	A	C	T	C	G	C	A	A	C	A	C	C	C	C	A	T	T	N	C	C	C	C	C	G	A	A	G	A	G	C	A	T	C	C	C	C	T	C	C	G	C	A
G	G	T	T	T	C	C	N	T	A	G	C	C	A	T	G	A	T	A	A	A	A	T	G	G	N	A	A	A	A	A	T	G	A	C	T	C	A	T	G	A	A	A	A	G	A	C	C	A	T
C	C	G	A	G	A	T	N	T	T	C	T	T	A	C	G	T	C	T	T	T	T	C	C	C	N	T	T	T	T	T	G	A	C	T	C	T	T	C	C	T	T	T	T	C	T	T	T	T	C
T	T	C	C	C	A	G	N	T	C	T	C	G	T	A	C	C	A	C	C	C	C	A	T	T	N	C	C	C	C	C	C	A	A	C	A	G	C	A	T	C	C	C	C	T	C	C	C	C	A
C	C	C	T	T	T	C	N	G	A	C	T	C	A	G	T	A	G	A	A	A	A	G	C	C	N	A	A	A	A	A	C	G	C	G	G	C	A	G	C	A	A	A	A	C	A	T	G	A	G
G	G	T	G	C	A	T	N	C	G	G	T	T	C	A	G	G	A	G	G	G	G	A	G	G	N	G	G	G	G	G	T	T	T	T	A	T	G	A	G	G	G	G	G	G	G	T	T	G	A
T	T	G	A	G	C	C	N	A	A	T	T	C	T	G	C	A	G	A	A	A	A	G	T	T	N	A	A	A	A	A	G	T	T	G	G	C	A	G	T	A	A	A	A	T	A	T	G	A	G
G	G	G	G	T	T	G	N	T	G	G	A	G	G	G	T	G	G	G	G	G	G	G	G	G	N	G	G	G	G	G	G	T	C	T	G	G	G	G	G	G	G	G	G	G	G	A	T	G	G
T	T	A	T	G	A	T	N	C	G	T	T	T	A	C	C	G	C	G	G	G	G	C	T	T	N	G	G	G	G	G	A	A	C	T	C	T	G	C	T	G	G	G	G	T	G	T	T	G	C
T	T	A	C	T	G	G	N	A	C	T	G	G	G	T	G	C	T	C	C	C	C	T	T	T	N	C	C	C	C	C	A	A	C	G	T	G	C	T	T	C	C	C	C	T	C	G	G	C	T
G	G	T	C	T	A	T	N	G	T	G	C	T	T	G	T	T	G	T	T	T	T	G	G	G	N	T	T	T	T	T	T	G	A	T	G	T	T	G	G	T	T	T	T	G	T	C	T	T	G
T	T	A	T	G	T	T	N	A	G	T	A	T	C	C	G	G	C	G	G	G	G	C	T	T	N	G	G	G	G	G	A	G	C	A	C	T	G	C	T	G	G	G	G	T	G	A	A	G	C
A	A	T	C	T	G	G	N	G	C	A	T	G	C	T	T	C	T	C	C	C	C	T	A	A	N	C	C	C	C	C	T	A	A	C	T	G	C	T	A	C	C	C	C	A	C	T	C	C	T
C	C	T	T	A	G	T	N	G	T	C	T	T	T	C	T	T	C	T	T	T	T	C	C	C	N	T	T	T	T	T	T	A	G	G	C	T	T	C	C	T	T	T	T	C	T	T	G	T	C
G	G	G	T	C	A	A	N	C	C	G	T	A	C	G	G	C	G	C	C	C	C	G	G	G	N	C	C	C	C	C	G	G	A	A	G	A	C	G	G	C	C	C	C	G	C	T	A	C	G
A	A	G	T	G	A	C	N	T	G	A	G	C	T	T	T	G	T	G	G	G	G	T	A	A	N	G	G	G	G	G	G	G	A	T	T	C	G	T	A	G	G	G	G	A	G	G	T	G	T
T	T	T	A	A	T	G	N	G	T	T	C	G	T	G	A	T	G	T	T	T	T	G	T	T	N	T	T	T	T	T	T	T	G	C	G	G	T	G	T	T	T	T	T	T	T	C	C	T	G
C	C	G	T	T	T	A	N	C	G	C	A	A	T	T	C	G	T	G	G	G	G	T	C	C	N	G	G	G	G	G	G	G	T	A	T	A	G	T	C	G	G	G	G	C	G	A	A	G	T
A	A	A	G	C	T	T	N	T	T	A	T	T	A	T	G	T	T	T	T	T	T	T	A	A	N	T	T	T	T	T	A	T	G	A	T	T	T	T	A	T	T	T	T	A	T	T	A	T	T
A	A	A	C	A	C	C	N	C	T	A	C	C	T	G	A	T	G	T	T	T	T	G	A	A	N	T	T	T	T	T	A	A	T	T	G	C	T	G	A	T	T	T	T	A	T	C	T	T	G
T	T	C	A	A	A	A	N	G	G	T	A	A	G	T	T	G	T	G	G	G	G	T	T	T	N	G	G	G	G	G	C	G	T	T	T	A	G	T	T	G	G	G	G	T	G	A	T	G	T
T	T	A	T	T	C	A	N	T	T	T	G	A	C	A	C	T	A	T	T	T	T	A	T	T	N	T	T	T	T	T	A	A	A	T	A	A	T	A	T	T	T	T	T	T	T	G	T	T	A
T	T	G	T	T	A	T	N	G	A	T	A	T	A	C	A	A	C	A	A	A	A	C	T	T	N	A	A	A	A	A	G	G	A	T	C	T	A	C	T	A	A	A	A	T	A	A	T	A	C
T	T	A	T	T	G	T	N	T	C	T	G	T	T	G	A	C	G	C	C	C	C	G	T	T	N	C	C	C	C	C	A	T	C	C	G	T	C	G	T	C	C	C	C	T	C	G	C	C	G
C	C	A	G	T	T	T	N	T	G	C	G	T	T	A	T	G	A	G	G	G	G	A	C	C	N	G	G	G	G	G	A	T	A	T	A	T	G	A	C	G	G	G	G	C	G	G	T	G	A
T	T	A	C	C	A	T	N	G	A	T	C	T	T	T	T	A	T	A	A	A	A	T	T	T	N	A	A	A	A	A	A	T	G	C	T	T	A	T	T	A	A	A	A	T	A	C	C	A	T
C	C	T	A	T	T	C	N	T	T	C	T	C	G	C	T	T	C	T	T	T	T	C	C	C	N	T	T	T	T	T	T	C	A	C	C	C	T	C	C	T	T	T	T	C	T	T	C	T	C
C	C	C	T	C	T	T	N	A	C	C	G	T	C	A	T	C	A	C	C	C	C	A	C	C	N	C	C	C	C	C	C	T	G	C	A	T	C	A	C	C	C	C	C	C	C	G	C	C	A
C	C	A	C	C	C	C	N	C	A	C	C	C	A	A	C	A	A	A	A	A	A	A	C	C	N	A	A	A	A	A	A	T	G	G	A	C	A	A	C	A	A	A	A	C	A	C	G	A	A
G	G	A	A	C	A	C	N	G	A	G	T	C	T	T	T	A	T	A	A	A	A	T	G	G	N	A	A	A	A	A	A	A	A	C	T	C	A	T	G	A	A	A	A	G	A	T	C	A	T
C	C	T	G	G	C	C	N	A	T	C	C	C	C	T	C	T	T	T	T	T	T	T	C	C	N	T	T	T	T	T	T	G	A	A	T	C	T	T	C	T	T	T	T	C	T	C	A	T	T
A	A	A	A	C	T	G	N	T	T	A	G	G	A	T	C	T	T	T	T	T	T	T	A	A	N	T	T	T	T	T	A	A	G	C	T	G	T	T	A	T	T	T	T	A	T	G	C	T	T
C	C	C	G	A	G	C	N	C	T	C	T	C	G	T	C	T	T	T	T	T	T	T	C	C	N	T	T	T	T	T	C	G	T	T	T	C	T	T	C	T	T	T	T	C	T	T	T	T	T
T	T	T	G	C	A	A	N	A	T	T	G	A	A	C	G	T	C	T	T	T	T	C	T	T	N	T	T	T	T	T	T	A	T	C	C	A	T	C	T	T	T	T	T	T	T	G	C	T	C
C	C	G	C	T	G	C	N	A	C	C	T	C	G	T	C	C	T	C	C	C	C	T	C	C	N	C	C	C	C	C	G	C	G	T	T	C	C	T	C	C	C	C	C	C	C	T	T	C	T
T	T	A	T	C	A	T	N	T	T	T	T	T	G	C	A	T	C	T	T	T	T	C	T	T	N	T	T	T	T	T	A	G	T	T	C	T	T	C	T	T	T	T	T	T	T	T	T	T	C
T	T	G	G	T	C	C	N	T	C	T	G	C	C	C	C	C	C	C	C	C	C	C	T	T	N	C	C	C	C	C	G	G	C	G	C	C	C	C	T	C	C	C	C	T	C	G	G	C	C
G	G	T	C	T	T	T	N	T	C	G	T	T	T	C	T	C	C	C	C	C	C	C	G	G	N	C	C	C	C	C	T	T	T	A	C	T	C	C	G	C	C	C	C	G	C	T	A	C	C
A	A	C	T	G	C	T	N	T	C	A	A	T	G	G	C	C	G	C	C	C	C	G	A	A	N	C	C	C	C	C	C	T	T	A	G	T	C	G	A	C	C	C	C	A	C	A	A	C	G
A	A	C	C	A	A	G	N	C	G	A	C	G	C	C	T	G	C	G	G	G	G	C	A	A	N	G	G	G	G	G	C	G	G	A	C	G	G	C	A	G	G	G	G	A	G	C	A	G	C
A	A	T	G	A	T	A	N	T	C	A	G	A	T	A	T	C	A	C	C	C	C	A	A	A	N	C	C	C	C	C	T	G	A	C	A	A	C	A	A	C	C	C	C	A	C	G	C	C	A
C	C	C	T	A	T	A	N	C	A	C	A	A	C	C	G	A	C	A	A	A	A	C	C	C	N	A	A	A	A	A	C	G	A	T	C	A	A	C	C	A	A	A	A	C	A	A	T	A	C
T	T	T	G	C	G	A	N	C	C	T	T	A	G	T	A	C	T	C	C	C	C	T	T	T	N	C	C	C	C	C	T	A	A	G	T	A	C	T	T	C	C	C	C	T	C	T	G	C	T
G	G	T	T	T	A	C	A	C	T	G	C	C	T	C	A	T	C	T	T	T	T	C	G	G	A	T	T	T	T	T	T	A	A	C	C	C	T	C	G	T	T	T	T	G	T	C	C	T	C
C	C	T	T	G	T	T	A	G	C	C	A	T	G	T	A	C	T	C	C	C	C	T	C	C	A	C	C	C	C	C	T	A	C	T	T	T	C	T	C	C	C	C	C	C	C	A	T	C	T
T	T	A	G	C	G	G	T	C	T	T	A	G	T	T	C	T	T	T	T	T	T	T	T	T	T	T	T	T	T	T	A	T	T	C	T	G	T	T	T	T	T	T	T	T	T	A	C	T	T
C	C	T	T	T	C	C	T	A	T	C	T	C	T	G	T	T	G	T	T	T	T	G	C	C	T	T	T	T	T	T	T	T	G	A	G	C	T	G	C	T	T	T	T	C	T	T	A	T	G
A	A	G	A	C	T	T	G	C	G	A	T	T	G	A	G	G	A	G	G	G	G	A	A	A	G	G	G	G	G	G	G	G	G	A	A	T	G	A	A	G	G	G	G	A	G	T	A	G	A
A	A	C	C	A	A	C	T	T	A	A	T	C	T	A	C	A	A	A	A	A	A	A	A	A	T	A	A	A	A	A	C	T	T	A	A	C	A	A	A	A	A	A	A	A	A	T	A	A	A
A	A	A	G	A	T	A	T	C	A	A	T	A	A	A	T	A	A	A	A	A	A	A	A	A	T	A	A	A	A	A	A	T	G	A	A	A	A	A	A	A	A	A	A	A	A	T	A	A	A
A	A	T	A	A	G	A	A	T	A	A	C	A	C	C	C	A	C	A	A	A	A	C	A	A	A	A	A	A	A	A	T	A	A	T	C	A	A	C	A	A	A	A	A	A	A	C	T	A	C
T	T	T	T	A	A	A	A	T	C	T	T	A	G	T	A	C	T	C	C	C	C	T	T	T	A	C	C	C	C	C	T	A	T	T	T	A	C	T	T	C	C	C	C	T	C	T	T	C	T
T	T	T	C	T	T	A	A	G	T	T	C	A	A	G	A	T	G	T	T	T	T	G	T	T	A	T	T	T	T	T	T	A	T	C	G	A	T	G	T	T	T	T	T	T	T	C	C	T	G
C	C	G	A	T	G	T	T	A	G	C	C	T	T	C	A	G	C	G	G	G	G	C	C	C	T	G	G	G	G	G	G	T	T	T	C	T	G	C	C	G	G	G	G	C	G	C	T	G	C
T	T	C	A	C	T	T	T	A	C	T	C	T	C	T	A	C	T	C	C	C	C	T	T	T	T	C	C	C	C	C	C	T	A	G	T	T	C	T	T	C	C	C	C	T	C	C	G	C	T
G	G	A	T	T	T	C	T	A	T	G	G	C	A	C	T	T	C	T	T	T	T	C	G	G	T	T	T	T	T	T	A	T	C	T	C	C	T	C	G	T	T	T	T	G	T	G	T	T	C
T	T	T	T	G	C	T	A	C	C	T	C	T	A	A	T	C	A	C	C	C	C	A	T	T	A	C	C	C	C	C	T	A	A	G	A	T	C	A	T	C	C	C	C	T	C	C	G	C	A
G	G	C	T	T	A	G	T	T	A	G	A	G	T	A	C	A	A	A	A	A	A	A	G	G	T	A	A	A	A	A	C	T	A	C	A	G	A	A	G	A	A	A	A	G	A	A	C	A	A
C	C	A	T	G	C	T	C	G	A	C	C	T	T	A	T	A	A	A	A	A	A	A	C	C	C	A	A	A	A	A	A	C	C	G	A	T	A	A	C	A	A	A	A	C	A	C	G	A	A
G	G	G	C	C	A	G	T	C	A	G	T	G	T	A	G	A	A	A	A	A	A	A	G	G	T	A	A	A	A	A	G	T	C	T	A	G	A	A	G	A	A	A	A	G	A	T	T	A	A
T	T	A	T	G	T	C	C	T	A	T	C	C	T	T	T	A	T	A	A	A	A	T	T	T	C	A	A	A	A	A	A	C	A	G	T	C	A	T	T	A	A	A	A	T	A	C	G	A	T
G	G	G	C	T	C	G	A	C	T	G	T	G	C	T	G	T	T	T	T	T	T	T	G	G	A	T	T	T	T	T	G	A	T	T	T	G	T	T	G	T	T	T	T	G	T	T	T	T	T
T	T	G	C	G	T	T	A	A	T	T	T	T	T	C	C	T	C	T	T	T	T	C	T	T	A	T	T	T	T	T	G	A	T	T	C	T	T	C	T	T	T	T	T	T	T	T	T	T	C
T	T	C	C	T	G	G	C	A	C	T	G	G	C	T	G	C	T	C	C	C	C	T	T	T	C	C	C	C	C	C	C	C	A	T	T	G	C	T	T	C	C	C	C	T	C	G	T	C	T
T	T	T	G	T	A	T	C	A	T	T	A	T	C	G	T	T	G	T	T	T	T	G	T	T	C	T	T	T	T	T	T	C	G	T	G	T	T	G	T	T	T	T	T	T	T	A	T	T	G
T	T	G	C	T	T	T	T	A	G	T	A	T	C	T	G	G	T	G	G	G	G	T	T	T	T	G	G	G	G	G	G	T	A	A	T	T	G	T	T	G	G	G	G	T	G	A	A	G	T
A	A	C	A	T	T	T	G	T	T	A	A	T	G	G	T	T	G	T	T	T	T	G	A	A	G	T	T	T	T	T	C	G	A	C	G	T	T	G	A	T	T	T	T	A	T	A	C	T	G
C	C	T	C	A	T	T	T	T	G	C	C	T	C	C	T	G	C	G	G	G	G	C	C	C	T	G	G	G	G	G	T	T	C	A	C	T	G	C	C	G	G	G	G	C	G	C	A	G	C
A	A	C	T	C	G	A	G	C	C	A	T	A	A	G	T	C	G	C	C	C	C	G	A	A	G	C	N	C	C	C	C	G	A	G	G	A	C	G	A	C	C	C	C	A	C	T	G	C	G
G	G	G	C	A	G	C	C	T	G	G	G	C	C	T	T	G	T	G	G	G	G	T	G	G	C	G	N	G	G	G	G	C	A	A	T	C	G	T	G	G	G	G	G	G	G	G	A	G	T
A	A	T	T	G	C	A	T	G	T	A	C	A	T	G	A	T	G	T	T	T	T	G	A	A	T	T	N	T	T	T	T	T	C	A	G	A	T	G	A	T	T	T	T	A	T	C	A	T	G
A	A	G	T	A	T	G	T	T	G	A	T	G	C	T	C	G	T	G	G	G	G	T	A	A	T	G	N	G	G	G	G	T	C	G	T	G	G	T	A	G	G	G	G	A	G	T	G	G	T
G	G	T	G	A	A	A	G	G	T	G	C	A	T	T	A	T	T	T	T	T	T	T	G	G	G	T	N	T	T	T	T	G	T	G	T	A	T	T	G	T	T	T	T	G	T	C	G	T	T
G	G	T	A	G	C	A	T	C	T	G	A	A	T	T	G	T	T	T	T	T	T	T	G	G	T	T	N	T	T	T	T	T	A	C	T	A	T	T	G	T	T	T	T	G	T	A	C	T	T
C	C	G	A	G	T	G	G	G	T	C	A	G	G	T	A	T	T	T	T	T	T	T	C	C	G	T	N	T	T	T	G	G	C	C	T	G	T	T	C	T	T	T	T	C	T	A	C	T	T
C	C	T	A	C	A	G	A	T	T	C	A	G	A	A	A	T	A	T	T	T	T	A	C	C	A	T	N	T	T	T	T	A	T	G	A	G	T	A	C	T	T	T	T	C	T	A	G	T	A
G	G	A	C	C	A	C	A	G	A	G	A	C	A	C	G	A	C	A	A	A	A	C	G	G	A	A	N	A	A	A	A	A	A	C	C	C	A	C	G	A	A	A	A	G	A	A	C	A	C
C	C	C	T	G	C	C	A	T	C	C	T	C	A	A	G	C	A	C	C	C	C	A	C	C	A	C	N	C	C	C	C	A	G	T	A	C	C	A	C	C	C	C	C	C	C	T	T	C	A
T	T	G	G	C	A	G	T	T	A	T	T	G	C	G	C	A	G	A	A	A	A	G	T	T	T	A	N	A	A	A	G	T	T	A	G	G	A	G	T	A	A	A	A	T	A	T	A	A	G
[truncated: 27,951 more rows]
[truncated: 344 more columns]

## Sheet: Di_Nucl_Trans_Female
	Reference	VEN_1	ARG_1	COL_1	COL_2	COL_3	COL_4	COL_5	COL_6	COL_7	COL_8	COL_9	COL_10	COL_11	COL_12	COL_13	COL_14	COL_15	COL_16	COL_17	COL_18	COL_19	COL_20	COL_21	COL_22	COL_23	COL_24	COL_25	COL_26	COL_27	COL_28	COL_29	COL_30	COL_31	COL_32	COL_33	COL_34	COL_35	COL_36	COL_37	COL_38	COL_39	COL_40	COL_41	COL_42	COL_43	COL_44	COL_45	COL_46
[truncated: 16 more rows]
[truncated: 299 more columns]

[truncated: 3 more sheets: Di_Nucl_Trans_Male, Mutation_Female, Mutation_Male]
