# Supplementary material for: A hybrid computational framework for intelligent inter-continent SARS-CoV-2 sub-strains characterization and prediction
Source: Sci Rep. 2021 Jul 15;11:14558. doi: 10.1038/s41598-021-93757-w (PMC8282786; doi:10.1038/s41598-021-93757-w)
Supplement: Supplementary file 8 — Supplementary Information 8. [file 41598_2021_93757_MOESM8_ESM.xlsx]

## Sheet: Reference
A
T
T
A
A
A
G
G
T
T
T
A
T
A
C
C
T
T
C
C
C
A
G
G
T
A
A
C
A
A
A
C
C
A
A
C
C
A
A
C
T
T
T
C
G
A
T
C
T
C
T
T
G
T
A
G
A
T
C
T
G
T
T
C
T
C
T
A
A
A
C
G
A
A
C
T
T
T
A
A
A
A
T
C
T
G
T
G
T
G
G
C
T
G
T
C
A
C
T
C
G
G
C
T
G
C
A
T
G
C
T
T
A
G
T
G
C
A
C
T
C
A
C
G
C
A
G
T
A
T
A
A
T
T
A
A
T
A
A
C
T
A
A
T
T
A
C
T
G
T
C
G
T
T
G
A
C
A
G
G
A
C
A
C
G
A
G
T
A
A
C
T
C
G
T
C
T
A
T
C
T
T
C
T
G
C
A
G
G
C
T
G
C
T
T
A
C
G
G
T
T
T
C
G
T
C
C
G
T
G
T
T
G
C
A
G
C
C
G
A
T
C
A
T
C
A
G
C
A
C
A
T
C
T
A
G
G
T
T
T
C
G
T
C
C
G
G
G
T
G
T
G
A
C
C
G
A
A
A
G
G
T
A
A
G
A
T
G
G
A
G
A
G
C
C
T
T
G
T
C
C
C
T
G
G
T
T
T
C
A
A
C
G
A
G
A
A
A
A
C
A
C
A
C
G
T
C
C
A
A
C
T
C
A
G
T
T
T
G
C
C
T
G
T
T
T
T
A
C
A
G
G
T
T
C
G
C
G
A
C
G
T
G
C
T
C
G
T
A
C
G
T
G
G
C
T
T
T
G
G
A
G
A
C
T
C
C
G
T
G
G
A
G
G
A
G
G
T
C
T
T
A
T
C
A
G
A
G
G
C
A
C
G
T
C
A
A
C
A
T
C
T
T
A
A
A
G
A
T
G
G
C
A
C
T
T
G
T
G
G
C
T
T
A
G
T
A
G
A
A
G
T
T
G
A
A
A
A
A
G
G
C
G
T
T
T
T
G
C
C
T
C
A
A
C
T
T
G
A
A
C
A
G
C
C
C
T
A
T
G
T
G
T
T
C
A
T
C
A
A
A
C
G
T
T
C
G
G
A
T
G
C
T
C
G
A
A
C
T
G
C
A
C
C
T
C
A
T
G
G
T
C
A
T
G
T
T
A
T
G
G
T
T
G
A
G
C
T
G
G
T
A
G
C
A
G
A
A
C
T
C
G
A
A
G
G
C
A
T
T
C
A
G
T
A
C
G
G
T
C
G
T
A
G
T
G
G
T
G
A
G
A
C
A
C
T
T
G
G
T
G
T
C
C
T
T
G
T
C
C
C
T
C
A
T
G
T
G
G
G
C
G
A
A
A
T
A
C
C
A
G
T
G
G
C
T
T
A
C
C
G
C
A
A
G
G
T
T
C
T
T
C
T
T
C
G
T
A
A
G
A
A
C
G
G
T
A
A
T
A
A
A
G
G
A
G
C
T
G
G
T
G
G
C
C
A
T
A
G
T
T
A
C
G
G
C
G
C
C
G
A
T
C
T
A
A
A
G
T
C
A
T
T
T
G
A
C
T
T
A
G
G
C
G
A
C
G
A
G
C
T
T
G
G
C
A
C
T
G
A
T
C
C
T
T
A
T
G
A
A
G
A
T
T
T
T
C
A
A
G
A
A
A
A
C
T
G
G
A
A
C
A
C
T
A
A
A
C
A
T
A
G
C
A
G
T
G
G
T
G
T
T
A
C
C
C
G
T
G
A
A
C
T
C
A
T
G
C
G
T
G
A
G
C
T
T
A
A
C
G
G
A
G
G
G
G
C
A
T
A
C
A
C
T
C
G
C
T
A
T
G
T
C
G
A
T
A
A
C
A
A
C
T
T
C
T
G
T
G
G
C
C
C
T
G
A
T
G
G
C
T
A
C
C
C
T
C
T
T
G
A
G
T
G
C
A
T
T
A
A
A
G
A
C
C
T
T
C
T
A
G
C
A
C
G
T
G
C
T
G
G
T
A
A
A
G
C
T
T
C
A
T
G
C
A
C
T
T
T
G
T
C
C
G
A
A
C
A
A
C
T
G
G
A
C
T
T
T
A
T
T
G
A
C
A
C
T
A
A
G
A
G
G
G
G
T
G
T
A
T
A
C
T
G
C
T
G
C
C
G
T
G
A
A
C
A
T
G
A
G
C
A
T
G
A
A
A
T
T
G
C
T
T
G
G
T
A
C
A
C
G
G
A
A
C
G
T
T
C
T
G
A
A
A
A
G
A
G
C
T
A
T
G
A
A
T
T
G
C
A
G
A
C
A
C
C
T
T
T
T
G
A
A
A
T
T
A
A
A
T
T
G
G
C
A
A
A
G
A
A
A
T
T
T
G
A
C
A
C
C
T
T
C
A
A
T
G
G
G
G
A
A
T
G
T
C
C
A
A
A
T
T
T
T
G
T
A
T
T
T
C
C
C
T
T
A
A
A
T
T
C
C
A
T
A
A
T
C
A
A
G
A
C
T
A
T
T
C
A
A
C
C
A
A
G
G
G
T
T
G
A
A
A
A
G
A
A
A
A
A
G
C
T
T
G
A
T
G
G
C
T
T
T
A
T
G
G
G
T
A
G
A
A
T
T
C
G
A
T
C
T
G
T
C
T
A
T
C
C
A
G
T
T
G
C
G
T
C
A
C
C
A
A
A
T
G
A
A
T
G
C
A
A
C
C
A
A
A
T
G
T
G
C
C
T
T
T
C
A
A
C
T
C
T
C
A
T
G
A
A
G
T
G
T
G
A
T
C
A
T
T
G
T
G
G
T
G
A
A
A
C
T
T
C
A
T
G
G
C
A
G
A
C
G
G
G
C
G
A
T
T
T
T
G
T
T
A
A
A
G
C
C
A
C
T
T
G
C
G
A
A
T
T
T
T
G
T
G
G
C
A
C
T
G
A
G
A
A
T
T
T
G
A
C
T
A
A
A
G
A
A
G
G
T
G
C
C
A
C
T
A
C
T
T
G
T
G
G
T
T
A
C
T
T
A
C
C
C
C
A
A
A
A
T
G
C
T
G
T
T
G
T
T
A
A
A
A
T
T
T
A
T
T
G
T
C
C
A
G
C
A
T
G
T
C
A
C
A
A
T
T
C
A
G
A
A
G
T
A
G
G
A
C
C
T
G
A
G
C
A
T
A
G
T
C
T
T
G
C
C
G
A
A
T
A
C
C
A
T
A
A
T
G
A
A
T
C
T
G
G
C
T
T
G
A
A
A
A
C
C
A
T
T
C
T
T
C
G
T
A
A
G
G
G
T
G
G
T
C
G
C
A
C
T
A
T
T
G
C
C
T
T
T
G
G
A
G
G
C
T
G
T
G
T
G
T
T
C
T
C
T
T
A
T
G
T
T
G
G
T
T
G
C
C
A
T
A
A
C
A
A
G
T
G
T
G
C
C
T
A
T
T
G
G
G
T
T
C
C
A
C
G
T
G
C
T
A
G
C
G
C
T
A
A
C
A
T
A
G
G
T
T
G
T
A
A
C
C
A
T
A
C
A
G
G
T
G
T
T
G
T
T
G
G
A
G
A
A
G
G
T
T
C
C
G
A
A
G
G
T
C
T
T
A
A
T
G
A
C
A
A
C
C
T
T
C
T
T
G
A
A
A
T
A
C
T
C
C
A
A
A
A
A
G
A
G
A
A
A
G
T
C
A
A
C
A
T
C
A
A
T
A
T
T
G
T
T
G
G
T
G
A
C
T
T
T
A
A
A
C
T
T
A
A
T
G
A
A
G
A
G
A
T
C
G
C
C
A
T
T
A
T
T
T
T
G
G
C
A
T
C
T
T
T
T
T
C
T
G
C
T
T
C
C
A
C
A
A
G
T
G
C
T
T
T
T
G
T
G
G
A
A
A
C
T
G
T
G
A
A
A
G
G
T
T
T
G
G
A
T
T
A
T
A
A
A
G
C
A
T
T
C
A
A
A
C
A
A
A
T
T
G
T
T
G
A
A
T
C
C
T
G
T
G
G
T
A
A
T
T
T
T
A
A
A
G
T
T
A
C
A
A
A
A
G
G
A
A
A
A
G
C
T
A
A
A
A
A
A
G
G
T
G
C
C
T
G
G
A
A
T
A
T
T
G
G
T
G
A
A
C
A
G
A
A
A
T
C
A
A
T
A
C
T
G
A
G
T
C
C
T
C
T
T
T
A
T
G
C
A
T
T
T
G
C
A
T
C
A
G
A
G
G
C
T
G
C
T
C
G
T
G
T
T
G
T
A
C
G
A
T
C
A
A
T
T
T
T
C
T
C
C
C
G
C
A
C
T
C
T
T
G
A
A
A
C
T
G
C
T
C
A
A
A
A
T
T
C
T
G
T
G
C
G
T
G
T
T
T
T
A
C
A
G
A
A
G
G
C
C
G
C
T
A
T
A
A
C
A
A
T
A
C
T
A
G
A
T
G
G
A
A
T
T
T
C
A
C
A
G
T
A
T
T
C
A
C
T
G
A
[truncated: 27,903 more rows]

## Sheet: female
AUS_1	AUS_2	AUS_3	AUS_4	AUS_5	NZL_1
EPI_ISL_408977	EPI_ISL_413213	EPI_ISL_413600	EPI_ISL_413596	EPI_ISL_413595	EPI_ISL_413490
A	A	A	A	A	A
G	G	T	T	T	G
A	A	G	G	G	A
T	T	G	G	G	T
C	C	A	A	A	C
T	T	G	G	G	T
G	G	A	A	A	G
T	T	G	G	G	T
T	T	C	C	C	T
C	C	C	C	C	C
T	T	T	T	T	T
C	C	T	T	T	C
T	T	G	G	G	T
A	A	T	T	T	A
A	A	C	C	C	A
A	A	C	C	C	A
C	C	C	C	C	C
G	G	T	T	T	G
A	A	G	G	G	A
A	A	G	G	G	A
C	C	T	T	T	C
T	T	T	T	T	T
T	T	T	T	T	T
T	T	C	C	C	T
A	A	A	A	A	A
A	A	A	A	A	A
A	A	C	C	C	A
A	A	G	G	G	A
T	T	A	A	A	T
C	C	G	G	G	C
T	T	A	A	A	T
G	G	A	A	A	G
T	T	A	A	A	T
G	G	A	A	A	G
T	T	C	C	C	T
G	G	A	A	A	G
G	G	C	C	C	G
C	C	A	A	A	C
T	T	C	C	C	T
G	G	G	G	G	G
T	T	T	T	T	T
C	C	C	C	C	C
A	A	C	C	C	A
C	C	A	A	A	C
T	T	A	A	A	T
C	C	C	C	C	C
G	G	T	T	T	G
G	G	C	C	C	G
C	C	A	A	A	C
T	T	G	G	G	T
G	G	T	T	T	G
C	C	T	T	T	C
A	A	T	T	T	A
T	T	G	G	G	T
G	G	C	C	C	G
C	C	C	C	C	C
T	T	T	T	T	T
T	T	G	G	G	T
A	A	T	T	T	A
G	G	T	T	T	G
T	T	T	T	T	T
G	G	T	T	T	G
C	C	A	A	A	C
A	A	C	C	C	A
C	C	A	A	A	C
T	T	G	G	G	T
C	C	G	G	G	C
A	A	T	T	T	A
C	C	T	T	T	C
G	G	C	C	C	G
C	C	G	G	G	C
A	A	C	C	C	A
G	G	G	G	G	G
T	T	A	A	A	T
A	A	C	C	C	A
T	T	G	G	G	T
A	A	T	T	T	A
A	A	G	G	G	A
T	T	C	C	C	T
T	T	T	T	T	T
A	A	C	C	C	A
A	A	G	G	G	A
T	T	T	T	T	T
A	A	A	A	A	A
A	A	C	C	C	A
C	C	G	G	G	C
T	T	T	T	T	T
A	A	G	G	G	A
A	A	G	G	G	A
T	T	C	C	C	T
T	T	T	T	T	T
A	A	T	T	T	A
C	C	T	T	T	C
T	T	G	G	G	T
G	G	G	G	G	G
T	T	A	A	A	T
C	C	G	G	G	C
G	G	A	A	A	G
T	T	C	C	C	T
T	T	T	T	T	T
G	G	C	C	C	G
A	A	C	C	C	A
C	C	G	G	G	C
A	A	T	T	T	A
G	G	G	G	G	G
G	G	G	G	G	G
A	A	A	A	A	A
C	C	G	G	G	C
A	A	G	G	G	A
C	C	A	A	A	C
G	G	G	G	G	G
A	A	G	G	G	A
G	G	T	T	T	G
T	T	C	C	C	T
A	A	T	T	T	A
A	A	T	T	T	A
C	C	A	A	A	C
T	T	T	T	T	T
C	C	C	C	C	C
G	G	A	A	A	G
T	T	G	G	G	T
C	C	A	A	A	C
T	T	G	G	G	T
A	A	G	G	G	A
T	T	C	C	C	T
C	C	A	A	A	C
T	T	C	C	C	T
T	T	G	G	G	T
C	C	T	T	T	C
T	T	C	C	C	T
G	G	A	A	A	G
C	C	A	A	A	C
A	A	C	C	C	A
G	G	A	A	A	G
G	G	T	T	T	G
C	C	C	C	C	C
T	T	T	T	T	T
G	G	T	T	T	G
C	C	A	A	A	C
T	T	A	A	A	T
T	T	A	A	A	T
A	A	G	G	G	A
C	C	A	A	A	C
G	G	T	T	T	G
G	G	G	G	G	G
T	T	G	G	G	T
T	T	C	C	C	T
T	T	A	A	A	T
C	C	C	C	C	C
G	G	T	T	T	G
T	T	T	T	T	T
C	C	G	G	G	C
C	C	T	T	T	C
G	G	G	G	G	G
T	T	G	G	G	T
G	G	C	C	C	G
T	T	T	T	T	T
T	T	T	T	T	T
G	G	A	A	A	G
C	C	G	G	G	C
A	A	T	T	T	A
G	G	A	A	A	G
C	C	G	G	G	C
C	C	A	A	A	C
G	G	A	A	A	G
A	A	G	G	G	A
T	T	T	T	T	T
C	C	T	T	T	C
A	A	G	G	G	A
T	T	A	A	A	T
C	C	A	A	A	C
A	A	A	A	A	A
G	G	A	A	A	G
C	C	A	A	A	C
A	A	G	G	G	A
C	C	G	G	G	C
A	A	C	C	C	A
T	T	G	G	G	T
C	C	T	T	T	C
T	T	T	T	T	T
A	A	T	T	T	A
G	G	T	T	T	G
G	G	G	G	G	G
T	T	C	C	C	T
T	T	C	C	C	T
T	T	T	T	T	T
C	C	C	C	C	C
G	G	A	A	A	G
T	T	A	A	A	T
C	C	C	C	C	C
C	C	T	T	T	C
G	G	T	T	T	G
G	G	G	G	G	G
G	G	A	A	A	G
T	T	A	A	A	T
G	G	C	C	C	G
T	T	A	A	A	T
G	G	G	G	G	G
A	A	C	C	C	A
C	C	C	C	C	C
C	C	C	C	C	C
G	G	T	T	T	G
A	A	A	A	A	A
A	A	T	T	T	A
A	A	G	G	G	A
G	G	T	T	T	G
G	G	G	G	G	G
T	T	T	T	T	T
A	A	T	T	T	A
A	A	C	C	C	A
G	G	A	A	A	G
A	A	T	T	T	A
T	T	C	C	C	T
G	G	A	A	A	G
G	G	A	A	A	G
A	A	A	A	A	A
G	G	C	C	C	G
A	A	G	G	G	A
G	G	T	T	T	G
C	C	T	T	T	C
C	C	C	C	C	C
T	T	G	G	G	T
T	T	G	G	G	T
G	G	A	A	A	G
T	T	T	T	T	T
C	C	G	G	G	C
C	C	C	C	C	C
C	C	T	T	T	C
T	T	C	C	C	T
G	G	G	G	G	G
G	G	A	A	A	G
T	T	A	A	A	T
T	T	C	C	C	T
T	T	T	T	T	T
C	C	G	G	G	C
A	A	C	C	C	A
A	A	A	A	A	A
C	C	C	C	C	C
G	G	C	C	C	G
A	A	T	T	T	A
G	G	C	C	C	G
A	A	A	A	A	A
A	A	T	T	T	A
A	A	G	G	G	A
A	A	G	G	G	A
C	C	T	T	T	C
A	A	C	C	C	A
C	C	A	A	A	C
A	A	T	T	T	A
C	C	G	G	G	C
G	G	T	T	T	G
T	T	T	T	T	T
C	C	A	A	A	C
C	C	T	T	T	C
A	A	G	G	G	A
A	A	G	G	G	A
C	C	T	T	T	C
T	T	T	T	T	T
C	C	G	G	G	C
A	A	A	A	A	A
G	G	G	G	G	G
T	T	C	C	C	T
T	T	T	T	T	T
T	T	G	G	G	T
G	G	G	G	G	G
C	C	T	T	T	C
C	C	A	A	A	C
T	T	G	G	G	T
G	G	C	C	C	G
T	T	A	A	A	T
T	T	G	G	G	T
T	T	A	A	A	T
T	T	A	A	A	T
A	A	C	C	C	A
C	C	T	T	T	C
A	A	C	C	C	A
G	G	G	G	G	G
G	G	A	A	A	G
T	T	A	A	A	T
T	T	G	G	G	T
C	C	G	G	G	C
G	G	C	C	C	G
C	C	A	A	A	C
G	G	T	T	T	G
A	A	T	T	T	A
C	C	C	C	C	C
G	G	A	A	A	G
T	T	G	G	G	T
G	G	T	T	T	G
C	C	A	A	A	C
T	T	C	C	C	T
C	C	G	G	G	C
G	G	G	G	G	G
T	T	T	T	T	T
A	A	C	C	C	A
C	C	G	G	G	C
G	G	T	T	T	G
T	T	A	A	A	T
G	G	G	G	G	G
G	G	T	T	T	G
C	C	G	G	G	C
T	T	G	G	G	T
T	T	T	T	T	T
T	T	G	G	G	T
G	G	A	A	A	G
G	G	G	G	G	G
A	A	A	A	A	A
G	G	C	C	C	G
A	A	A	A	A	A
C	C	C	C	C	C
T	T	T	T	T	T
C	C	T	T	T	C
C	C	G	G	G	C
G	G	G	G	G	G
T	T	T	T	T	T
G	G	G	G	G	G
G	G	T	T	T	G
A	A	C	C	C	A
G	G	C	C	C	G
G	G	T	T	T	G
A	A	T	T	T	A
G	G	G	G	G	G
G	G	T	T	T	G
T	T	C	C	C	T
C	C	C	C	C	C
T	T	C	C	C	T
T	T	T	T	T	T
A	A	C	C	C	A
T	T	A	A	A	T
C	C	T	T	T	C
A	A	G	G	G	A
G	G	T	T	T	G
A	A	G	G	G	A
G	G	G	G	G	G
G	G	G	G	G	G
C	C	C	C	C	C
A	A	G	G	G	A
C	C	A	A	A	C
G	G	A	A	A	G
T	T	A	A	A	T
C	C	T	T	T	C
A	A	A	A	A	A
A	A	C	C	C	A
C	C	C	C	C	C
A	A	A	A	A	A
T	T	G	G	G	T
C	C	T	T	T	C
T	T	G	G	G	T
T	T	G	G	G	T
A	A	C	C	C	A
A	A	T	T	T	A
A	A	T	T	T	A
G	G	A	A	A	G
A	A	C	C	C	A
T	T	C	C	C	T
G	G	G	G	G	G
G	G	C	C	C	G
C	C	A	A	A	C
A	A	A	A	A	A
C	C	G	G	G	C
T	T	G	G	G	T
T	T	T	T	T	T
G	G	T	T	T	G
T	T	C	C	C	T
G	G	T	T	T	G
G	G	T	T	T	G
C	C	C	C	C	C
T	T	T	T	T	T
T	T	T	T	T	T
A	A	C	C	C	A
G	G	G	G	G	G
T	T	T	T	T	T
A	A	A	A	A	A
G	G	A	A	A	G
A	A	G	G	G	A
A	A	A	A	A	A
G	G	A	A	A	G
T	T	C	C	C	T
T	T	G	G	G	T
G	G	G	G	G	G
A	A	T	T	T	A
A	A	A	A	A	A
A	A	A	A	A	A
A	A	T	T	T	A
A	A	A	A	A	A
G	G	A	A	A	G
G	G	A	A	A	G
C	C	G	G	G	C
G	G	G	G	G	G
T	T	A	A	A	T
T	T	G	G	G	T
T	T	C	C	C	T
T	T	T	T	T	T
G	G	G	G	G	G
C	C	G	G	G	C
C	C	T	T	T	C
T	T	G	G	G	T
C	C	G	G	G	C
A	A	C	C	C	A
A	A	C	C	C	A
C	C	A	A	A	C
T	T	T	T	T	T
T	T	A	A	A	T
G	G	G	G	G	G
A	A	T	T	T	A
A	A	T	T	T	A
C	C	A	A	A	C
A	A	C	C	C	A
G	G	G	G	G	G
C	C	G	G	G	C
C	C	C	C	C	C
C	C	G	G	G	C
T	T	C	C	C	T
A	A	C	C	C	A
T	T	G	G	G	T
G	G	A	A	A	G
T	T	T	T	T	T
G	G	C	C	C	G
T	T	T	T	T	T
T	T	A	A	A	T
C	C	A	A	A	C
A	A	A	A	A	A
T	T	G	G	G	T
C	C	T	T	T	C
A	A	C	C	C	A
A	A	A	A	A	A
A	A	T	T	T	A
C	C	T	T	T	C
G	G	T	T	T	G
T	T	G	G	G	T
T	T	A	A	A	T
C	C	C	C	C	C
G	G	T	T	T	G
G	G	T	T	T	G
A	A	A	A	A	A
T	T	G	G	G	T
G	G	G	G	G	G
C	C	C	C	C	C
T	T	G	G	G	T
C	C	A	A	A	C
G	G	C	C	C	G
A	A	G	G	G	A
A	A	A	A	A	A
C	C	G	G	G	C
T	T	C	C	C	T
G	G	T	T	T	G
C	C	T	T	T	C
A	A	G	G	G	A
C	C	G	G	G	C
C	C	C	C	C	C
T	T	A	A	A	T
C	C	C	C	C	C
A	A	T	T	T	A
T	T	G	G	G	T
G	G	A	A	A	G
G	G	T	T	T	G
T	T	C	C	C	T
C	C	C	C	C	C
A	A	T	T	T	A
T	T	T	T	T	T
G	G	A	A	A	G
T	T	T	T	T	T
T	T	G	G	G	T
A	A	A	A	A	A
T	T	A	A	A	T
G	G	G	G	G	G
G	G	A	A	A	G
T	T	T	T	T	T
T	T	T	T	T	T
G	G	T	T	T	G
A	A	T	T	T	A
G	G	C	C	C	G
C	C	A	A	A	C
T	T	A	A	A	T
G	G	G	G	G	G
G	G	A	A	A	G
T	T	A	A	A	T
A	A	A	A	A	A
G	G	A	A	A	G
C	C	C	C	C	C
A	A	T	T	T	A
G	G	G	G	G	G
A	A	G	G	G	A
A	A	A	A	A	A
C	C	A	A	A	C
T	T	C	C	C	T
C	C	A	A	A	C
G	G	C	C	C	G
A	A	T	T	T	A
A	A	A	A	A	A
G	G	A	A	A	G
G	G	A	A	A	G
C	C	C	C	C	C
A	A	A	A	A	A
T	T	T	T	T	T
T	T	A	A	A	T
C	C	G	G	G	C
A	A	C	C	C	A
G	G	A	A	A	G
T	T	G	G	G	T
A	A	T	T	T	A
C	C	G	G	G	C
G	G	G	G	G	G
G	G	T	T	T	G
T	T	G	G	G	T
C	C	T	T	T	C
G	G	T	T	T	G
T	T	A	A	A	T
A	A	C	C	C	A
G	G	C	C	C	G
T	T	C	C	C	T
G	G	G	G	G	G
G	G	T	T	T	G
T	T	G	G	G	T
G	G	A	A	A	G
A	A	A	A	A	A
G	G	C	C	C	G
A	A	T	T	T	A
C	C	C	C	C	C
A	A	A	A	A	A
C	C	T	T	T	C
T	T	G	G	G	T
T	T	C	C	C	T
G	G	G	G	G	G
G	G	T	T	T	G
T	T	G	G	G	T
G	G	A	A	A	G
T	T	G	G	G	T
C	C	C	C	C	C
C	C	T	T	T	C
T	T	T	T	T	T
T	T	A	A	A	T
G	G	A	A	A	G
T	T	C	C	C	T
C	C	G	G	G	C
C	C	G	G	G	C
C	C	A	A	A	C
T	T	G	G	G	T
C	C	G	G	G	C
A	A	G	G	G	A
T	T	G	G	G	T
G	G	C	C	C	G
T	T	A	A	A	T
G	G	T	T	T	G
G	G	A	A	A	G
G	G	C	C	C	G
C	C	A	A	A	C
G	G	C	C	C	G
A	A	T	T	T	A
A	A	C	C	C	A
A	A	G	G	G	A
T	T	C	C	C	T
A	A	T	T	T	A
C	C	A	A	A	C
C	C	T	T	T	C
A	A	G	G	G	A
G	G	T	T	T	G
T	T	C	C	C	T
G	G	G	G	G	G
G	G	A	A	A	G
C	C	T	T	T	C
T	T	A	A	A	T
T	T	A	A	A	T
A	A	C	C	C	A
C	C	A	A	A	C
C	C	A	A	A	C
G	G	C	C	C	G
C	C	T	T	T	C
A	A	T	T	T	A
A	A	C	C	C	A
G	G	T	T	T	G
G	G	G	G	G	G
T	T	T	T	T	T
T	T	G	G	G	T
C	C	G	G	G	C
T	T	C	C	C	T
T	T	C	C	C	T
C	C	C	C	C	C
T	T	T	T	T	T
T	T	G	G	G	T
C	C	A	A	A	C
G	G	T	T	T	G
T	T	G	G	G	T
A	A	G	G	G	A
A	A	C	C	C	A
G	G	T	T	T	G
A	A	A	A	A	A
A	A	C	C	C	A
C	C	C	C	C	C
G	G	C	C	C	G
G	G	T	T	T	G
T	T	C	C	C	T
A	A	T	T	T	A
A	A	T	T	T	A
T	T	G	G	G	T
A	A	A	A	A	A
A	A	G	G	G	A
A	A	T	T	T	A
G	G	G	G	G	G
G	G	C	C	C	G
A	A	A	A	A	A
G	G	T	T	T	G
C	C	T	T	T	C
T	T	A	A	A	T
G	G	A	A	A	G
G	G	A	A	A	G
T	T	G	G	G	T
G	G	A	A	A	G
G	G	C	C	C	G
C	C	C	C	C	C
C	C	T	T	T	C
A	A	T	T	T	A
T	T	C	C	C	T
A	A	T	T	T	A
G	G	A	A	A	G
T	T	G	G	G	T
T	T	C	C	C	T
A	A	A	A	A	A
C	C	C	C	T	C
G	G	G	G	G	G
G	G	T	T	T	G
C	C	G	G	G	C
G	G	C	C	C	G
C	C	T	T	T	C
C	C	G	G	G	C
G	G	G	G	G	G
A	A	T	T	T	A
T	T	A	A	A	T
C	C	A	A	A	C
T	T	A	A	A	T
A	A	G	G	G	A
A	A	C	C	C	A
A	A	T	T	T	A
G	G	T	T	T	G
T	T	C	C	C	T
C	C	A	A	A	C
A	A	T	T	T	A
T	T	G	G	G	T
T	T	C	C	C	T
T	T	A	A	A	T
G	G	C	C	C	G
A	A	T	T	T	A
C	C	T	T	T	C
T	T	T	T	T	T
T	T	G	G	G	T
A	A	T	T	T	A
G	G	C	C	C	G
G	G	C	C	C	G
C	C	G	G	G	C
G	G	A	A	A	G
A	A	A	A	A	A
C	C	C	C	C	C
G	G	A	A	A	G
A	A	A	A	A	A
G	G	C	C	C	G
C	C	T	T	T	C
T	T	G	G	G	T
T	T	G	G	G	T
G	G	A	A	A	G
G	G	C	C	C	G
C	C	T	T	T	C
A	A	T	T	T	A
C	C	T	T	T	C
T	T	A	A	A	T
G	G	T	T	T	G
A	A	T	T	T	A
T	T	G	G	G	T
C	C	A	A	A	C
C	C	C	C	C	C
T	T	A	A	A	T
T	T	C	C	C	T
A	A	T	T	T	A
T	T	A	A	A	T
G	G	A	A	A	G
A	A	G	G	G	A
A	A	A	A	A	A
G	G	G	G	G	G
A	A	G	G	G	A
T	T	G	G	G	T
T	T	G	G	G	T
T	T	T	T	T	T
T	T	G	G	G	T
C	C	T	T	T	C
A	A	A	A	A	A
A	A	T	T	T	A
G	G	A	A	A	G
A	A	C	C	C	A
A	A	T	T	T	A
A	A	G	G	G	A
A	A	C	C	C	A
C	C	T	T	T	C
T	T	G	G	G	T
G	G	C	C	C	G
G	G	C	C	C	G
A	A	G	G	G	A
A	A	T	T	T	A
C	C	G	G	G	C
A	A	A	A	A	A
C	C	A	A	A	C
T	T	C	C	C	T
A	A	A	A	A	A
A	A	T	T	T	A
A	A	G	G	G	A
C	C	A	A	A	C
A	A	G	G	G	A
T	T	C	C	C	T
A	A	A	A	A	A
G	G	T	T	T	G
C	C	G	G	G	C
A	A	A	A	A	A
G	G	A	A	A	G
T	T	A	A	A	T
G	G	T	T	T	G
G	G	T	T	T	G
T	T	G	G	G	T
G	G	C	C	C	G
T	T	T	T	T	T
T	T	T	T	T	T
A	A	G	G	G	A
C	C	G	G	G	C
C	C	T	T	T	C
C	C	A	A	A	C
G	G	C	C	C	G
T	T	A	A	A	T
G	G	C	C	C	G
A	A	G	G	G	A
A	A	G	G	G	A
C	C	A	A	A	C
T	T	A	A	A	T
C	C	C	C	C	C
A	A	G	G	G	A
T	T	T	T	T	T
G	G	T	T	T	G
C	C	C	C	C	C
G	G	T	T	T	G
T	T	G	G	G	T
G	G	A	A	A	G
A	A	A	A	A	A
G	G	A	A	A	G
C	C	A	A	A	C
T	T	G	G	G	T
T	T	A	A	A	T
A	A	G	G	G	A
A	A	C	C	C	A
C	C	T	T	T	C
G	G	A	A	A	G
G	G	T	T	T	G
A	A	G	G	G	A
G	G	A	A	A	G
G	G	A	A	A	G
G	G	T	T	T	G
G	G	T	T	T	G
C	C	G	G	G	C
A	A	C	C	C	A
T	T	A	A	A	T
A	A	G	G	G	A
C	C	A	A	A	C
A	A	C	C	C	A
C	C	A	A	A	C
T	T	C	C	C	T
C	C	C	C	C	C
G	G	T	T	T	G
C	C	T	T	T	C
T	T	T	T	T	T
A	A	T	T	T	A
T	T	G	G	G	T
G	G	A	A	A	G
T	T	A	A	A	T
C	C	A	A	A	C
G	G	T	T	T	G
A	A	T	T	T	A
T	T	A	A	A	T
A	A	A	A	A	A
A	A	A	A	A	A
C	C	T	T	T	C
A	A	T	T	T	A
A	A	G	G	G	A
C	C	G	G	G	C
T	T	C	C	C	T
T	T	A	A	A	T
C	C	A	A	A	C
T	T	A	A	A	T
G	G	G	G	G	G
T	T	A	A	A	T
G	G	A	A	A	G
G	G	A	A	A	G
C	C	T	T	T	C
C	C	T	T	T	C
C	C	T	T	T	C
T	T	G	G	G	T
G	G	A	A	A	G
A	A	C	C	C	A
T	T	A	A	A	T
G	G	C	C	C	G
G	G	C	C	C	G
C	C	T	T	T	C
T	T	T	T	T	T
A	A	C	C	C	A
C	C	A	A	A	C
C	C	A	A	A	C
C	C	T	T	T	C
T	T	G	G	G	T
C	C	G	G	G	C
T	T	G	G	G	T
T	T	G	G	G	T
G	G	A	A	A	G
A	A	A	A	A	A
G	G	T	T	T	G
T	T	G	G	G	T
G	G	T	T	T	G
C	C	C	C	C	C
A	A	C	C	C	A
T	T	A	A	A	T
T	T	A	A	A	T
A	A	A	A	A	A
A	A	T	T	T	A
A	A	T	T	T	A
G	G	T	T	T	G
A	A	T	T	T	A
C	C	G	G	G	C
C	C	T	T	T	C
T	T	A	A	A	T
T	T	T	T	T	T
C	C	T	T	T	C
T	T	T	T	T	T
A	A	C	C	C	A
G	G	C	C	C	G
C	C	C	C	C	C
A	A	T	T	T	A
C	T	T	T	T	C
G	G	A	A	A	G
T	T	A	A	A	T
G	G	A	A	A	G
C	C	T	T	T	C
T	T	T	T	T	T
G	G	C	C	C	G
G	G	C	C	C	G
T	T	A	A	A	T
A	A	T	T	T	A
A	A	A	A	A	A
A	A	A	A	A	A
G	G	T	T	T	G
C	C	C	C	C	C
T	T	A	A	A	T
T	T	A	A	A	T
C	C	G	G	G	C
A	A	A	A	A	A
T	T	C	C	C	T
G	G	T	T	T	G
C	C	A	A	A	C
A	A	T	T	T	A
C	C	T	T	T	C
T	T	C	C	C	T
T	T	A	A	A	T
T	T	A	A	A	T
G	G	C	C	C	G
T	T	C	C	C	T
C	C	A	A	A	C
C	C	A	A	A	C
G	G	G	G	G	G
A	A	G	G	G	A
A	A	G	G	G	A
C	C	T	T	T	C
A	A	T	T	T	A
A	A	G	G	G	A
C	C	A	A	A	C
T	T	A	A	A	T
G	G	A	A	A	G
G	G	A	A	A	G
A	A	G	G	G	A
C	C	A	A	A	C
T	T	A	A	A	T
T	T	A	A	A	T
T	T	A	A	A	T
A	A	A	A	A	A
T	T	G	G	G	T
T	T	C	C	C	T
G	G	T	T	T	G
A	A	T	T	T	A
C	C	G	G	G	C
A	A	A	A	A	A
C	C	T	T	T	C
T	T	G	G	G	T
A	A	G	G	G	A
A	A	C	C	C	A
G	G	T	T	T	G
A	A	T	T	T	A
G	G	T	T	T	G
G	G	A	A	A	G
G	G	T	T	T	G
G	G	G	G	G	G
T	T	G	G	G	T
G	G	G	G	G	G
T	T	T	T	T	T
A	A	A	A	A	A
T	T	G	G	G	T
A	A	A	A	A	A
C	C	A	A	A	C
T	T	T	T	T	T
G	G	T	T	T	G
C	C	C	C	C	C
T	T	G	G	G	T
G	G	A	A	A	G
C	C	T	T	T	C
C	C	C	C	C	C
G	G	T	T	T	G
T	T	G	G	G	T
G	G	T	T	T	G
A	A	C	C	C	A
A	A	T	T	T	A
C	C	A	A	A	C
A	A	T	T	T	A
T	T	C	C	C	T
G	G	C	C	C	G
A	A	A	A	A	A
G	G	G	G	G	G
C	C	T	T	T	C
A	A	T	T	T	A
T	T	G	G	G	T
G	G	C	C	C	G
A	A	G	G	G	A
A	A	T	T	T	A
A	A	C	C	C	A
T	T	A	A	A	T
T	T	C	C	C	T
G	G	C	C	C	G
C	C	A	A	A	C
T	T	A	A	A	T
T	T	A	A	A	T
G	G	T	T	T	G
G	G	G	G	G	G
T	T	A	A	A	T
A	A	A	A	A	A
C	C	T	T	T	C
A	A	G	G	G	A
C	C	C	C	C	C
G	G	A	A	A	G
G	G	A	A	A	G
A	A	C	C	C	A
A	A	C	C	C	A
C	C	A	A	A	C
G	G	A	A	A	G
T	T	A	A	A	T
T	T	T	T	T	T
C	C	G	G	G	C
T	T	T	T	T	T
G	G	G	G	G	G
A	A	C	C	C	A
A	A	C	C	C	A
A	A	T	T	T	A
A	A	T	T	T	A
G	G	T	T	T	G
A	A	C	C	C	A
G	G	A	A	A	G
C	C	A	A	A	C
T	T	C	C	C	T
A	A	T	T	T	A
T	T	C	C	C	T
G	G	T	T	T	G
A	A	C	C	C	A
A	A	A	A	A	A
T	T	T	T	T	T
T	T	G	G	G	T
G	G	A	A	A	G
C	C	A	A	A	C
A	A	G	G	G	A
G	G	T	T	T	G
A	A	G	G	G	A
C	C	T	T	T	C
A	A	G	G	G	A
C	C	A	A	A	C
C	C	T	T	T	C
T	T	C	C	C	T
T	T	A	A	A	T
T	T	T	T	T	T
T	T	T	T	T	T
G	G	G	G	G	G
A	A	T	T	T	A
A	A	G	G	G	A
A	A	G	G	G	A
T	T	T	T	T	T
T	T	G	G	G	T
A	A	A	A	A	A
A	A	A	A	A	A
A	A	A	A	A	A
T	T	C	C	C	T
T	T	T	T	T	T
G	G	T	T	T	G
G	G	C	C	C	G
C	C	A	A	A	C
A	A	T	T	T	A
A	A	G	G	G	A
A	A	G	G	G	A
G	G	C	C	C	G
A	A	A	A	A	A
A	A	G	G	G	A
A	A	A	A	A	A
T	T	C	C	C	T
T	T	G	G	G	T
T	T	G	G	G	T
G	G	G	G	G	G
A	A	C	C	C	A
C	C	G	G	G	C
A	A	A	A	A	A
C	C	T	T	T	C
C	C	T	T	T	C
T	T	T	T	T	T
T	T	T	T	T	T
C	C	G	G	G	C
A	A	T	T	T	A
A	A	T	T	T	A
T	T	A	A	A	T
G	G	A	A	A	G
G	G	A	A	A	G
G	G	G	G	G	G
G	G	C	C	C	G
A	A	C	C	C	A
A	A	A	A	A	A
T	T	C	C	C	T
G	G	T	T	T	G
T	T	T	T	T	T
C	C	G	G	G	C
C	C	C	C	C	C
A	A	G	G	G	A
A	A	A	A	A	A
A	A	A	A	A	A
T	T	T	T	T	T
T	T	T	T	T	T
T	T	T	T	T	T
T	T	T	T	T	T
G	G	G	G	G	G
T	T	T	T	T	T
A	A	G	G	G	A
T	T	G	G	G	T
T	T	C	C	C	T
T	T	A	A	A	T
C	C	C	C	C	C
C	C	T	T	T	C
C	C	G	G	G	C
T	T	A	A	A	T
T	T	G	G	G	T
A	A	A	A	A	A
A	A	A	A	A	A
A	A	T	T	T	A
T	T	T	T	T	T
T	T	T	T	T	T
C	C	G	G	G	C
C	C	A	A	A	C
A	A	C	C	C	A
T	T	T	T	T	T
A	A	A	A	A	A
A	A	A	A	A	A
T	T	A	A	A	T
C	C	G	G	G	C
A	A	A	A	A	A
A	A	A	A	A	A
G	G	G	G	G	G
A	A	G	G	G	A
C	C	T	T	T	C
T	T	G	G	G	T
A	A	C	C	C	A
T	T	C	C	C	T
T	T	A	A	A	T
C	C	C	C	C	C
A	A	T	T	T	A
A	A	A	A	A	A
C	C	C	C	C	C
C	C	T	T	T	C
A	A	T	T	T	A
A	A	G	G	G	A
G	G	T	T	T	G
G	G	G	G	G	G
G	G	G	G	G	G
T	T	T	T	T	T
T	T	T	T	T	T
G	G	A	A	A	G
A	A	C	C	C	A
A	A	T	T	T	A
A	A	T	T	T	A
A	A	A	A	A	A
G	G	C	C	C	G
A	A	C	C	C	A
A	A	C	C	C	A
A	A	C	C	C	A
A	A	A	A	A	A
A	A	A	A	A	A
G	G	A	A	A	G
C	C	A	A	A	C
T	T	T	T	T	T
T	T	G	G	G	T
G	G	C	C	C	G
A	A	T	T	T	A
T	T	G	G	G	T
G	G	T	T	T	G
G	G	T	T	T	G
C	C	G	G	G	C
T	T	T	T	T	T
T	T	T	T	T	T
T	T	A	A	A	T
A	A	A	A	A	A
T	T	A	A	A	T
G	G	A	A	A	G
G	G	T	T	T	G
G	G	T	T	T	G
T	T	T	T	T	T
A	A	A	A	A	A
G	G	T	T	T	G
A	A	T	T	T	A
A	A	G	G	G	A
T	T	T	T	T	T
T	T	C	C	C	T
C	C	C	C	C	C
G	G	A	A	A	G
A	A	G	G	G	A
T	T	C	C	C	T
C	C	A	A	A	C
T	T	T	T	T	T
G	G	G	G	G	G
T	T	T	T	T	T
C	C	C	C	C	C
T	T	A	A	A	T
A	A	C	C	C	A
T	T	A	A	A	T
C	C	A	A	A	C
C	C	T	T	T	C
A	A	T	T	T	A
G	G	C	C	C	G
T	T	A	A	A	T
T	T	G	G	G	T
G	G	A	A	A	G
C	C	A	A	A	C
G	G	A	G	A	G
T	T	T	T	T	T
C	C	A	A	A	C
A	A	G	G	G	A
C	C	G	G	G	C
C	C	A	A	A	C
A	A	C	C	C	A
A	A	C	C	C	A
A	A	T	T	T	A
T	T	G	G	G	T
G	G	A	A	A	G
A	A	G	G	G	A
A	A	C	C	C	A
T	T	A	A	A	T
G	G	T	T	T	G
C	C	A	A	A	C
A	A	G	G	G	A
A	A	T	T	T	A
C	C	C	C	C	C
C	C	T	T	T	C
A	A	T	T	T	A
A	A	G	G	G	A
A	A	C	C	C	A
T	T	C	C	C	T
G	G	G	G	G	G
T	T	A	A	A	T
G	G	A	A	A	G
C	C	T	T	T	C
C	C	A	A	A	C
T	T	C	C	C	T
T	T	C	C	C	T
T	T	A	A	A	T
C	C	T	T	T	C
A	A	A	A	A	A
A	A	A	A	A	A
C	C	T	T	T	C
T	T	G	G	G	T
C	C	A	A	A	C
T	T	A	A	A	T
C	C	T	T	T	C
A	A	C	C	C	A
T	T	T	T	T	T
G	G	G	G	G	G
A	A	G	G	G	A
A	A	C	C	C	A
G	G	T	T	T	G
T	T	T	T	T	T
G	G	G	G	G	G
T	T	A	A	A	T
G	G	A	A	A	G
A	A	A	A	A	A
T	T	A	A	A	T
C	C	C	C	C	C
A	A	C	C	C	A
T	T	A	A	A	T
T	T	T	T	T	T
G	G	T	T	T	G
T	T	C	C	C	T
G	G	T	T	T	G
G	G	T	T	T	G
T	T	C	C	C	T
G	G	G	G	G	G
A	A	T	T	T	A
A	A	A	A	A	A
A	A	A	A	A	A
C	C	G	G	G	C
T	T	G	G	G	T
T	T	G	G	G	T
C	C	T	T	T	C
A	A	G	G	G	A
T	T	G	G	G	T
G	G	T	T	T	G
G	G	C	C	C	G
C	C	G	G	G	C
A	A	C	C	C	A
G	G	A	A	A	G
A	A	C	C	C	A
C	C	T	T	T	C
G	G	A	A	A	G
G	G	T	T	T	G
G	G	T	T	T	G
C	C	G	G	G	C
G	G	C	C	C	G
A	A	C	C	C	A
T	T	T	T	T	T
T	T	T	T	T	T
T	T	T	T	T	T
T	T	G	G	G	T
G	G	G	G	G	G
T	T	A	A	A	T
T	T	G	G	G	T
A	A	G	G	G	A
A	A	C	C	C	A
A	A	T	T	T	A
G	G	G	G	G	G
C	C	T	T	T	C
C	C	G	G	G	C
A	A	T	T	T	A
C	C	G	G	G	C
T	T	T	T	T	T
T	T	T	T	T	T
G	G	C	C	C	G
C	C	T	T	T	C
G	G	C	C	C	G
A	A	T	T	T	A
A	A	T	T	T	A
T	T	A	A	A	T
T	T	T	T	T	T
T	T	G	G	G	T
T	T	T	T	T	T
G	G	T	T	T	G
T	T	G	G	G	T
G	G	G	G	G	G
G	G	T	T	T	G
C	C	T	T	T	C
A	A	G	G	G	A
C	C	C	C	C	C
T	T	C	C	C	T
G	G	A	A	A	G
A	A	T	T	T	A
G	G	A	A	A	G
A	A	A	A	A	A
A	A	C	C	C	A
T	T	A	A	A	T
T	T	A	A	A	T
T	T	G	G	G	T
G	G	T	T	T	G
A	A	G	G	G	A
C	C	T	T	T	C
T	T	G	G	G	T
A	A	C	C	C	A
A	A	C	C	C	A
A	A	T	T	T	A
G	G	A	A	A	G
A	A	T	T	T	A
A	A	T	T	T	A
G	G	G	G	G	G
G	G	G	G	G	G
T	T	G	G	G	T
G	G	T	T	T	G
C	C	T	T	T	C
C	C	C	C	C	C
A	A	C	C	C	A
C	C	A	A	A	C
T	T	C	C	C	T
A	A	G	G	G	A
C	C	T	T	T	C
T	T	G	G	G	T
T	T	C	C	C	T
G	G	T	T	T	G
T	T	A	A	A	T
G	G	G	G	G	G
G	G	C	C	C	G
T	T	G	G	G	T
T	T	C	C	C	T
A	A	T	T	T	A
C	C	A	A	A	C
T	T	A	A	A	T
T	T	C	C	C	T
A	A	A	A	A	A
C	C	T	T	T	C
C	C	A	A	A	C
C	C	G	G	G	C
C	C	G	G	G	C
A	A	T	T	T	A
A	A	T	T	T	A
A	A	G	G	G	A
A	A	T	T	T	A
T	T	A	A	A	T
G	G	A	A	A	G
C	C	C	C	C	C
T	T	C	C	C	T
G	G	A	A	A	G
T	T	T	T	T	T
T	T	A	A	A	T
G	G	C	C	C	G
T	T	A	A	A	T
T	T	G	G	G	T
A	A	G	G	G	A
A	A	T	T	T	A
A	A	G	G	G	A
A	A	T	T	T	A
T	T	T	T	T	T
T	T	G	G	G	T
T	T	T	T	T	T
A	A	T	T	T	A
T	T	G	G	G	T
T	T	G	G	G	T
G	G	A	A	A	G
T	T	G	G	G	T
C	C	A	A	A	C
C	C	A	A	A	C
A	A	G	G	G	A
G	G	G	G	G	G
C	C	T	T	T	C
A	A	T	T	T	A
T	T	C	C	C	T
G	G	C	C	C	G
T	T	G	G	G	T
C	C	A	A	A	C
A	A	A	A	A	A
C	C	G	G	G	C
A	A	G	G	G	A
A	A	T	T	T	A
T	T	C	C	C	T
T	T	T	T	T	T
C	C	T	T	T	C
A	A	A	A	A	A
G	G	A	A	A	G
A	A	T	T	T	A
A	A	G	G	G	A
G	A	A	A	A	A
T	T	C	C	C	T
A	A	A	A	A	A
G	G	A	A	A	G
G	G	C	C	C	G
A	A	C	C	C	A
C	C	T	T	T	C
C	C	T	T	T	C
T	T	C	C	C	T
G	G	T	T	T	G
A	A	T	T	T	A
G	G	G	G	G	G
C	C	A	A	A	C
A	A	A	A	A	A
T	T	A	A	A	T
A	A	T	T	T	A
G	G	A	A	A	G
T	T	C	C	C	T
C	C	T	T	T	C
T	T	C	C	C	T
T	T	C	C	C	T
G	G	A	A	A	G
C	C	A	A	A	C
C	C	A	A	A	C
G	G	A	A	A	G
A	A	A	A	A	A
A	A	G	G	G	A
T	T	A	A	A	T
A	A	G	G	G	A
C	C	A	A	A	C
C	C	A	A	A	C
A	A	A	A	A	A
T	T	G	G	G	T
A	A	T	T	T	A
A	A	C	C	C	A
T	T	A	A	A	T
G	G	A	A	A	G
A	A	C	C	C	A
A	A	A	A	A	A
T	T	T	T	T	T
C	C	C	C	C	C
T	T	A	A	A	T
G	G	A	A	A	G
G	G	T	T	T	G
C	C	A	A	A	C
T	T	T	T	T	T
T	T	T	T	T	T
G	G	G	G	G	G
A	A	T	T	T	A
A	A	T	T	T	A
A	A	G	G	G	A
A	A	G	G	G	A
C	C	T	T	T	C
C	C	G	G	G	C
A	A	A	A	A	A
T	T	C	C	C	T
T	T	T	T	T	T
C	C	T	T	T	C
T	T	T	T	T	T
T	T	A	A	A	T
C	C	A	A	A	C
G	G	A	A	A	G
T	T	C	C	C	T
A	A	T	T	T	A
A	A	T	T	T	A
G	G	A	A	A	G
G	G	A	A	A	G
G	G	T	T	T	G
T	T	G	G	G	T
G	G	A	A	A	G
G	G	A	A	A	G
T	T	G	G	G	T
C	C	A	A	A	C
G	G	G	G	G	G
C	C	A	A	A	C
A	A	T	T	T	A
C	C	C	C	C	C
T	T	G	G	G	T
A	A	C	C	C	A
T	T	C	C	C	T
T	T	A	A	A	T
G	G	T	T	T	G
C	C	T	T	T	C
C	C	A	A	A	C
T	T	T	T	T	T
T	T	T	T	T	T
T	T	T	T	T	T
G	G	T	T	T	G
G	G	G	G	G	G
A	A	G	G	G	A
G	G	C	C	C	G
G	G	A	A	A	G
C	C	T	T	T	C
T	T	C	C	C	T
G	G	T	T	T	G
T	T	T	T	T	T
G	G	T	T	T	G
T	T	T	T	T	T
G	G	T	T	T	G
T	T	C	C	C	T
T	T	T	T	T	T
C	C	G	G	G	C
T	T	C	C	C	T
C	C	T	T	T	C
T	T	T	T	T	T
T	T	C	C	C	T
A	A	C	C	C	A
T	T	A	A	A	T
G	G	C	C	C	G
T	T	A	A	A	T
T	T	A	A	A	T
G	G	G	G	G	G
G	G	T	T	T	G
T	T	G	G	G	T
T	T	C	C	C	T
G	G	T	T	T	G
C	C	T	T	T	C
C	C	T	T	T	C
A	A	T	T	T	A
T	T	G	G	G	T
A	A	T	T	T	A
A	A	G	G	G	A
C	C	G	G	G	C
A	A	A	A	A	A
A	A	A	A	A	A
G	G	A	A	A	G
T	T	C	C	C	T
G	G	T	T	T	G
T	T	G	G	G	T
G	G	T	T	T	G
C	C	G	G	G	C
C	C	A	A	A	C
T	T	A	A	A	T
A	A	A	A	A	A
T	T	G	G	G	T
T	T	G	G	G	T
G	G	T	T	T	G
G	G	T	T	T	G
G	G	T	T	T	G
T	T	G	G	G	T
T	T	G	G	G	T
C	C	A	A	A	C
C	C	T	T	T	C
A	A	T	T	T	A
C	C	A	A	A	C
G	G	T	T	T	G
T	T	A	A	A	T
G	G	A	A	A	G
C	C	A	A	A	C
T	T	G	G	G	T
A	A	C	C	C	A
G	G	A	A	A	G
C	C	T	T	T	C
G	G	T	T	T	G
C	C	C	C	C	C
T	T	A	A	A	T
A	A	A	A	A	A
A	A	A	A	A	A
C	C	C	C	C	C
A	A	A	A	A	A
T	T	A	A	A	T
A	A	A	A	A	A
G	G	T	T	T	G
G	G	T	T	T	G
T	T	G	G	G	T
T	T	T	T	T	T
G	G	T	T	T	G
T	T	G	G	G	T
A	A	A	A	A	A
A	A	A	A	A	A
C	C	T	T	T	C
C	C	C	C	C	C
A	A	C	C	C	A
T	T	T	T	T	T
A	A	G	G	G	A
C	C	T	T	T	C
A	A	G	G	G	A
G	G	G	G	G	G
G	G	T	T	T	G
T	T	A	A	A	T
G	G	A	A	A	G
T	T	T	T	T	T
T	T	T	T	T	T
G	G	T	T	T	G
T	T	T	T	T	T
T	T	A	A	A	T
G	G	A	A	A	G
G	G	A	A	A	G
A	A	G	G	G	A
G	G	T	T	T	G
A	A	T	T	T	A
A	A	A	A	A	A
G	G	C	C	C	G
G	G	A	A	A	G
T	T	A	A	A	T
T	T	A	A	A	T
C	C	A	A	A	C
C	C	G	G	G	C
G	G	G	G	G	G
A	A	A	A	A	A
A	A	A	A	A	A
G	G	A	A	A	G
G	G	A	A	A	G
T	T	G	G	G	T
C	C	C	C	C	C
T	T	T	T	T	T
T	T	A	A	A	T
A	A	A	A	A	A
A	A	A	A	A	A
T	T	A	A	A	T
G	G	A	A	A	G
A	A	A	A	A	A
C	C	G	G	G	C
A	A	G	G	G	A
A	A	T	T	T	A
C	C	G	G	G	C
C	C	C	C	C	C
T	T	C	C	C	T
T	T	T	T	T	T
C	C	G	G	G	C
T	T	G	G	G	T
T	T	A	A	A	T
G	G	A	A	A	G
A	A	T	T	T	A
A	A	A	A	A	A
A	A	T	T	T	A
T	T	T	T	T	T
A	A	G	G	G	A
C	C	G	G	G	C
T	T	T	T	T	T
C	C	G	G	G	C
C	C	A	A	A	C
A	A	A	A	A	A
A	A	C	C	C	A
A	A	A	A	A	A
A	A	G	G	G	A
A	A	A	A	A	A
G	G	A	A	A	G
A	A	A	A	A	A
G	G	T	T	T	G
A	A	C	C	C	A
A	A	A	A	A	A
A	A	A	A	A	A
G	G	T	T	T	G
T	T	A	A	A	T
C	C	C	C	C	C
A	A	T	T	T	A
A	A	G	G	G	A
C	C	A	A	A	C
A	A	G	G	G	A
T	T	T	T	T	T
C	C	C	C	C	C
A	A	C	C	C	A
A	A	T	T	T	A
T	T	C	C	C	T
A	A	T	T	T	A
T	T	T	T	T	T
T	T	T	T	T	T
G	G	A	A	A	G
T	T	T	T	T	T
T	T	G	G	G	T
G	G	C	C	C	G
G	G	A	A	A	G
T	T	T	T	T	T
G	G	T	T	T	G
A	A	T	T	T	A
C	C	G	G	G	C
T	T	C	C	C	T
T	T	A	A	A	T
T	T	T	T	T	T
A	A	C	C	C	A
A	A	A	A	A	A
A	A	G	G	G	A
C	C	A	A	A	C
T	T	G	G	G	T
T	T	G	G	G	T
A	A	C	C	C	A
A	A	T	T	T	A
T	T	G	G	G	T
G	G	C	C	C	G
A	A	T	T	T	A
A	A	C	C	C	A
G	G	G	G	G	G
A	A	T	T	T	A
G	G	G	G	G	G
A	A	T	T	T	A
T	T	T	T	T	T
C	C	G	G	G	C
G	G	T	T	T	G
C	C	A	A	A	C
C	C	C	C	C	C
A	A	G	G	G	A
T	T	A	A	A	T
T	T	T	T	T	T
A	A	C	C	C	A
T	T	A	A	A	T
T	T	A	A	A	T
T	T	T	T	T	T
T	T	T	T	T	T
G	G	T	T	T	G
G	G	T	T	T	G
C	C	C	C	C	C
A	A	T	T	T	A
T	T	C	C	C	T
C	C	C	C	C	C
T	T	C	C	C	T
T	T	G	G	G	T
T	T	C	C	C	T
T	T	A	A	A	T
T	T	C	C	C	T
C	C	T	T	T	C
T	T	C	C	C	T
G	G	T	T	T	G
C	C	T	T	T	C
T	T	G	G	G	T
T	T	A	A	A	T
C	C	A	A	A	C
C	C	A	A	A	C
A	A	C	C	C	A
C	C	T	T	T	C
A	A	G	G	G	A
A	A	C	C	C	A
G	G	T	T	T	G
T	T	C	C	C	T
G	G	A	A	A	G
C	C	A	A	A	C
T	T	A	A	A	T
T	T	A	A	A	T
T	T	T	T	T	T
T	T	T	T	T	T
G	G	C	C	C	G
T	T	T	T	T	T
G	G	G	G	G	G
G	G	T	T	T	G
A	A	G	G	G	A
A	A	C	C	C	A
A	A	G	G	G	A
C	C	T	T	T	C
T	T	G	G	G	T
G	G	T	T	T	G
T	T	T	T	T	T
G	G	T	T	T	G
A	A	T	T	T	A
A	A	A	A	A	A
A	A	C	C	C	A
G	G	A	A	A	G
G	G	G	G	G	G
T	T	A	A	A	T
T	T	A	A	A	T
T	T	G	G	G	T
G	G	G	G	G	G
G	G	C	C	C	G
A	A	C	C	C	A
T	T	G	G	G	T
T	T	C	C	C	T
A	A	T	T	T	A
T	T	A	A	A	T
A	A	T	T	T	A
A	A	A	A	A	A
A	A	A	A	A	A
G	G	C	C	C	G
C	C	A	A	A	C
A	A	A	A	A	A
T	T	T	T	T	T
T	T	A	A	A	T
C	C	C	C	C	C
A	A	T	T	T	A
A	A	A	A	A	A
A	A	G	G	G	A
C	C	A	A	A	C
A	A	T	T	T	A
A	A	G	G	G	A
A	A	G	G	G	A
T	T	A	A	A	T
T	T	A	A	A	T
G	G	T	T	T	G
T	T	T	T	T	T
T	T	T	T	T	T
G	G	C	C	C	G
A	A	A	A	A	A
A	A	C	C	C	A
T	T	A	A	A	T
C	C	G	G	G	C
C	C	T	T	T	C
T	T	A	A	A	T
G	G	T	T	T	G
T	T	T	T	T	T
G	G	C	C	C	G
G	G	A	A	A	G
T	T	C	C	C	T
A	A	T	T	T	A
A	A	G	G	G	A
T	T	A	A	A	T
T	T	G	G	G	T
T	T	A	A	A	T
T	T	C	C	C	T
A	A	T	T	T	A
A	A	C	C	C	A
A	A	A	A	A	A
G	G	T	T	T	G
T	T	T	T	T	T
T	T	G	G	G	T
A	A	A	A	A	A
C	C	T	T	T	C
A	A	G	G	G	A
A	A	C	C	C	A
A	A	T	T	T	A
A	A	A	A	A	A
G	G	T	T	T	G
G	G	G	G	G	G
A	A	A	A	A	A
A	A	T	T	T	A
A	A	G	G	G	A
A	A	T	T	T	A
G	G	T	T	T	G
C	C	C	C	C	C
T	T	A	A	A	T
A	A	C	C	C	A
A	A	A	A	A	A
A	A	T	T	T	A
A	A	C	C	C	A
A	A	T	T	T	A
A	A	G	G	G	A
G	G	A	A	A	G
G	G	T	T	T	G
T	T	T	T	T	T
G	G	T	T	T	G
C	C	G	G	G	C
C	C	G	G	G	C
T	T	C	C	C	T
G	G	T	T	T	G
G	G	A	A	A	G
A	A	C	C	C	A
A	A	T	T	T	A
T	T	A	A	A	T
A	A	A	A	A	A
T	T	C	C	C	T
T	T	A	A	A	T
G	G	A	A	A	G
G	G	T	T	T	G
T	T	C	C	C	T
G	G	T	T	T	G
A	A	A	A	A	A
A	A	G	G	G	A
C	C	T	T	T	C
A	A	T	T	T	A
G	G	G	G	G	G
A	A	T	T	T	A
A	A	A	A	A	A
A	A	A	A	A	A
T	T	T	T	T	T
C	C	G	G	G	C
A	A	G	G	G	A
A	A	C	C	C	A
T	T	C	C	C	T
A	A	T	T	T	A
C	C	A	A	A	C
T	T	C	C	C	T
G	G	A	A	A	G
A	A	T	T	T	A
G	G	T	T	T	G
T	T	A	A	A	T
C	C	C	C	C	C
C	C	A	A	A	C
T	T	G	G	G	T
C	C	G	G	G	C
T	T	T	T	T	T
T	T	G	G	G	T
T	T	G	G	G	T
A	A	T	T	T	A
T	T	G	G	G	T
G	G	T	T	T	G
C	C	T	T	T	C
A	A	G	G	G	A
T	T	T	T	T	T
T	T	T	T	T	T
T	T	C	C	C	T
G	G	A	A	A	G
C	C	G	G	G	C
A	A	T	T	T	A
T	T	T	T	T	T
C	C	G	G	G	C
A	A	A	A	A	A
G	G	C	C	C	G
A	A	T	T	T	A
G	G	T	T	T	G
G	G	C	C	C	G
C	C	G	G	G	C
T	T	C	C	C	T
G	G	A	A	A	G
C	C	G	G	G	C
T	T	T	T	T	T
C	C	G	G	G	C
G	G	G	G	G	G
T	T	C	C	C	T
G	G	T	T	T	G
T	T	A	A	A	T
T	T	A	A	A	T
G	G	C	C	C	G
T	T	T	T	T	T
A	A	A	A	A	A
C	C	A	A	A	C
G	G	C	C	C	G
A	A	A	A	A	A
T	T	T	T	T	T
C	C	C	C	C	C
A	A	T	T	T	A
A	A	T	T	T	A
T	T	T	T	T	T
T	T	G	G	G	T
T	T	G	G	G	T
T	T	C	C	C	T
C	C	A	A	A	C
T	T	C	C	C	T
C	C	T	T	T	C
C	C	G	G	G	C
C	C	T	T	T	C
G	G	T	T	T	G
C	C	T	T	T	C
A	A	A	A	A	A
C	C	T	T	T	C
T	T	G	G	G	T
C	C	A	A	A	C
T	T	A	A	A	T
T	T	A	A	A	T
G	G	A	A	A	G
A	A	A	A	A	A
A	A	C	C	C	A
A	A	T	T	T	A
C	C	C	C	C	C
T	T	A	A	A	T
G	G	A	A	A	G
C	C	A	A	A	C
T	T	C	C	C	T
C	C	C	C	C	C
A	A	C	C	C	A
A	A	G	G	G	A
A	A	T	T	T	A
A	A	C	C	C	A
T	T	C	C	C	T
T	T	T	T	T	T
C	C	T	T	T	C
T	T	G	G	G	T
G	G	A	A	A	G
T	T	T	T	T	T
G	G	T	T	T	G
C	C	G	G	G	C
G	G	G	G	G	G
T	T	C	C	C	T
G	G	T	T	T	G
T	T	T	T	T	T
T	T	G	G	G	T
T	T	A	A	A	T
T	T	A	A	A	T
A	A	G	G	G	A
C	C	A	A	A	C
A	A	G	G	G	A
G	G	A	A	A	G
A	A	A	A	A	A
A	A	G	G	G	A
G	G	T	T	T	G
G	G	T	T	T	G
C	C	T	T	T	C
C	C	A	A	A	C
G	G	A	A	A	G
C	C	G	G	G	C
T	T	G	G	G	T
A	A	A	A	A	A
T	T	A	A	A	T
A	A	G	G	G	A
A	A	G	G	G	A
C	C	T	T	T	C
A	A	G	G	G	A
A	A	T	T	T	A
T	T	A	A	A	T
A	A	G	G	G	A
C	C	A	A	A	C
T	T	G	G	G	T
A	A	T	T	T	A
G	G	T	T	T	G
A	A	T	T	T	A
T	T	C	C	C	T
G	G	T	T	T	G
G	G	T	T	T	G
A	A	A	A	A	A
A	A	G	G	G	A
T	T	A	A	A	T
T	T	G	G	G	T
T	T	A	A	A	T
C	C	C	C	C	C
A	A	G	G	G	A
C	C	G	G	G	C
A	A	T	T	T	A
G	G	T	T	T	G
T	T	G	G	G	T
A	A	G	G	G	A
T	T	G	G	G	T
T	T	A	A	A	T
C	C	A	A	A	C
A	A	A	A	A	A
C	C	T	T	T	C
T	T	T	T	T	T
G	G	G	G	G	G
A	A	T	T	T	A
G	G	T	T	T	G
A	A	A	A	A	A
C	C	A	A	A	C
T	T	A	A	A	T
C	C	T	T	T	C
A	A	T	T	T	A
T	T	T	T	T	T
T	T	A	A	A	T
G	G	T	T	T	G
A	A	C	C	C	A
T	T	T	T	T	T
G	G	C	C	C	G
C	C	A	A	A	C
T	T	A	A	A	T
A	A	C	C	C	A
T	T	C	C	C	T
G	G	T	T	T	G
A	A	G	G	G	A
T	T	T	T	T	T
G	G	G	G	G	G
T	T	C	C	C	T
T	T	T	T	T	T
C	C	T	T	T	C
A	A	G	G	G	A
C	C	T	T	T	C
A	A	G	G	G	A
T	T	A	A	A	T
C	C	A	A	A	C
T	T	A	A	A	T
G	G	T	T	T	G
A	A	T	T	T	A
T	T	G	G	G	T
T	T	T	T	T	T
T	T	C	C	C	T
G	G	G	G	G	G
G	G	G	G	G	G
C	C	T	T	T	C
T	T	G	G	G	T
A	A	G	G	G	A
C	C	A	A	A	C
T	T	C	C	C	T
A	A	A	A	A	A
A	A	A	A	A	A
C	C	A	A	A	C
A	A	T	T	T	A
A	A	T	T	T	A
T	T	G	G	G	T
C	C	T	T	T	C
T	T	C	C	C	T
A	A	A	A	A	A
G	G	C	C	C	G
T	T	C	C	C	T
[truncated: 27,784 more rows]

## Sheet: male
AUS_1	AUS_2	AUS_3	AUS_4	AUS_5	AUS_6	AUS_7	AUS_8	AUS_9	GUM_1	GUM_2	NZL_1
EPI_ISL_413599	EPI_ISL_413598	EPI_ISL_413214	EPI_ISL_417030	EPI_ISL_413597	EPI_ISL_407893	EPI_ISL_413594	EPI_ISL_412975	EPI_ISL_408976	EPI_ISL_444998	EPI_ISL_445000	EPI_ISL_534335
A	A	A	A	A	A	A	A	A	A	A	A
T	T	G	G	T	G	T	G	G	T	C	G
G	G	A	A	G	A	G	A	A	T	C	A
G	G	T	T	G	T	G	T	T	A	T	T
A	A	C	C	A	C	A	C	C	A	T	C
G	G	T	T	G	T	G	T	T	A	C	T
A	A	G	G	A	G	A	G	G	G	C	G
G	G	T	T	G	T	G	T	T	G	C	T
C	C	T	T	C	T	C	T	T	T	A	T
C	C	C	C	C	C	C	C	C	T	G	C
T	T	T	T	T	T	T	T	T	T	G	T
T	T	C	C	T	C	T	C	C	A	T	C
G	G	T	T	G	T	G	T	T	T	A	T
T	T	A	A	T	A	T	A	A	A	A	A
C	C	A	A	C	A	C	A	A	C	C	A
C	C	A	A	C	A	C	A	A	C	A	A
C	C	C	C	C	C	C	C	C	T	A	C
T	T	G	G	T	G	T	G	G	T	A	G
G	G	A	A	G	A	G	A	A	C	C	A
G	G	A	A	G	A	G	A	A	C	C	A
T	T	C	C	T	C	T	C	C	C	A	C
T	T	T	T	T	T	T	T	T	A	A	T
T	T	T	T	T	T	T	T	T	G	C	T
C	C	T	T	C	T	C	T	T	G	C	T
A	A	A	A	A	A	A	A	A	T	A	A
A	A	A	A	A	A	A	A	A	A	A	A
C	C	A	A	C	A	C	A	A	A	C	A
G	G	A	A	G	A	G	A	A	C	T	A
A	A	T	T	A	T	A	T	T	A	T	T
G	G	C	C	G	C	G	C	C	A	T	C
A	A	T	T	A	T	A	T	T	A	C	T
A	A	G	G	A	G	A	G	G	C	G	G
A	A	T	T	A	T	A	T	T	C	A	T
A	A	G	G	A	G	A	G	G	A	T	G
C	C	T	T	C	T	C	T	T	A	C	T
A	A	G	G	A	G	A	G	G	C	T	G
C	C	G	G	C	G	C	G	G	C	C	G
A	A	C	C	A	C	A	C	C	A	T	C
C	C	T	T	C	T	C	T	T	A	T	T
G	G	G	G	G	G	G	G	G	C	G	G
T	T	T	T	T	T	T	T	T	T	T	T
C	C	C	C	C	C	C	C	C	T	A	C
C	C	A	A	C	A	C	A	A	T	G	A
A	A	C	C	A	C	A	C	C	C	A	C
A	A	T	T	A	T	A	T	T	G	T	T
C	C	C	C	C	C	C	C	C	A	C	C
T	T	G	G	T	G	T	G	G	T	T	G
C	C	G	G	C	G	C	G	G	C	G	G
A	A	C	C	A	C	A	C	C	T	T	C
G	G	T	T	G	T	G	T	T	C	T	T
T	T	G	G	T	G	T	G	G	T	C	G
T	T	C	C	T	C	T	C	C	T	T	C
T	T	A	A	T	A	T	A	A	G	C	A
G	G	T	T	G	T	G	T	T	T	T	T
C	C	G	G	C	G	C	G	G	A	A	G
C	C	C	C	C	C	C	C	C	G	A	C
T	T	T	T	T	T	T	T	T	A	A	T
G	G	T	T	G	T	G	T	T	T	C	T
T	T	A	A	T	A	T	A	A	C	G	A
T	T	G	G	T	G	T	G	G	T	A	G
T	T	T	T	T	T	T	T	T	G	A	T
T	T	G	G	T	G	T	G	G	T	C	G
A	A	C	C	A	C	A	C	C	T	T	C
C	C	A	A	C	A	C	A	A	C	T	A
A	A	C	C	A	C	A	C	C	T	T	C
G	G	T	T	G	T	G	T	T	C	A	T
G	G	C	C	G	C	G	C	C	T	A	C
T	T	A	A	T	A	T	A	A	A	A	A
T	T	C	C	T	C	T	C	C	A	A	C
C	C	G	G	C	G	C	G	G	A	T	G
G	G	C	C	G	C	G	C	C	C	C	C
C	C	A	A	C	A	C	A	A	G	T	A
G	G	G	G	G	G	G	G	G	A	G	G
A	A	T	T	A	T	A	T	T	A	T	T
C	C	A	A	C	A	C	A	A	C	G	A
G	G	T	T	G	T	G	T	T	T	T	T
T	T	A	A	T	A	T	A	A	T	G	A
G	G	A	A	G	A	G	A	A	T	G	A
C	C	T	T	C	T	C	T	T	A	C	T
T	T	T	T	T	T	T	T	T	A	T	T
C	C	A	A	C	A	C	A	A	A	G	A
G	G	A	A	G	A	G	A	A	A	T	A
T	T	T	T	T	T	T	T	T	T	C	T
A	A	A	A	A	A	A	A	A	C	A	A
C	C	A	A	C	A	C	A	A	T	C	A
G	G	C	C	G	C	G	C	C	G	T	C
T	T	T	T	T	T	T	T	T	T	C	T
G	G	A	A	G	A	G	A	A	G	G	A
G	G	A	A	G	A	G	A	A	T	G	A
C	C	T	T	C	T	C	T	T	G	C	T
T	T	T	T	T	T	T	T	T	G	T	T
T	T	A	A	T	A	T	A	A	C	G	A
T	T	C	C	T	C	T	C	C	T	C	C
G	G	T	T	G	T	G	T	T	G	A	T
G	G	G	G	G	G	G	G	G	T	T	G
A	A	T	T	A	T	A	T	T	C	G	T
G	G	C	C	G	C	G	C	C	A	C	C
A	A	G	G	A	G	A	G	G	C	T	G
C	C	T	T	C	T	C	T	T	T	T	T
T	T	T	T	T	T	T	T	T	C	A	T
C	C	G	G	C	G	C	G	G	G	G	G
C	C	A	A	C	A	C	A	A	G	T	A
G	G	C	C	G	C	G	C	C	C	G	C
T	T	A	A	T	A	T	A	A	T	C	A
G	G	G	G	G	G	G	G	G	G	A	G
G	G	G	G	G	G	G	G	G	C	C	G
A	A	A	A	A	A	A	A	A	A	T	A
G	G	C	C	G	C	G	C	C	T	C	C
G	G	A	A	G	A	G	A	A	G	A	A
A	A	C	C	A	C	A	C	C	C	C	C
G	G	G	G	G	G	G	G	G	T	G	G
G	G	A	A	G	A	G	A	A	T	C	A
T	T	G	G	T	G	T	G	G	A	A	G
C	C	T	T	C	T	C	T	T	G	G	T
T	T	A	A	T	A	T	A	A	T	T	A
T	T	A	A	T	A	T	A	A	G	A	A
A	A	C	C	A	C	A	C	C	C	T	C
T	T	T	T	T	T	T	T	T	A	A	T
C	C	C	C	C	C	C	C	C	C	A	C
A	A	G	G	A	G	A	G	G	T	T	G
G	G	T	T	G	T	G	T	T	C	T	T
A	A	C	C	A	C	A	C	C	A	A	C
G	G	T	T	G	T	G	T	T	C	A	T
G	G	A	A	G	A	G	A	A	G	T	A
C	C	T	T	C	T	C	T	T	C	A	T
A	A	C	C	A	C	A	C	C	A	A	C
C	C	T	T	C	T	C	T	T	G	C	T
G	G	T	T	G	T	G	T	T	T	T	T
T	T	C	C	T	C	T	C	C	A	A	C
C	C	T	T	C	T	C	T	T	T	A	T
A	A	G	G	A	G	A	G	G	A	T	G
A	A	C	C	A	C	A	C	C	A	T	C
C	C	A	A	C	A	C	A	A	T	A	A
A	A	G	G	A	G	A	G	G	T	C	G
T	T	G	G	T	G	T	G	G	A	T	G
C	C	C	C	C	C	C	C	C	A	G	C
T	T	T	T	T	T	T	T	T	T	T	T
T	T	G	G	T	G	T	G	G	A	C	G
A	A	C	C	A	C	A	C	C	A	G	C
A	A	T	T	A	T	A	T	T	C	T	T
A	A	T	T	A	T	A	T	T	T	T	T
G	G	A	A	G	A	G	A	A	A	G	A
A	A	C	C	A	C	A	C	C	A	A	C
T	T	G	G	T	G	T	G	G	T	C	G
G	G	G	G	G	G	G	G	G	T	A	G
G	G	T	T	G	T	G	T	T	A	G	T
C	C	T	T	C	T	C	T	T	C	G	T
A	A	T	T	A	T	A	T	T	T	A	T
C	C	C	C	C	C	C	C	C	G	C	C
T	T	G	G	T	G	T	G	G	T	A	G
T	T	T	T	T	T	T	T	T	C	C	T
G	G	C	C	G	C	G	C	C	G	G	C
T	T	C	C	T	C	T	C	C	T	A	C
G	G	G	G	G	G	G	G	G	T	G	G
G	G	T	T	G	T	G	T	T	G	T	T
C	C	G	G	C	G	C	G	G	A	A	G
T	T	T	T	T	T	T	T	T	C	A	T
T	T	T	T	T	T	T	T	T	A	C	T
A	A	G	G	A	G	A	G	G	G	T	G
G	G	C	C	G	C	G	C	C	G	C	C
T	T	A	A	T	A	T	A	A	A	G	A
A	A	G	G	A	G	A	G	G	C	T	G
G	G	C	C	G	C	G	C	C	A	C	C
A	A	C	C	A	C	A	C	C	C	T	C
A	A	G	G	A	G	A	G	G	G	A	G
G	G	A	A	G	A	G	A	A	A	T	A
T	T	T	T	T	T	T	T	T	G	C	T
T	T	C	C	T	C	T	C	C	T	T	C
G	G	A	A	G	A	G	A	A	A	T	A
A	A	T	T	A	T	A	T	T	A	C	T
A	A	C	C	A	C	A	C	C	C	T	C
A	A	A	A	A	A	A	A	A	T	G	A
A	A	G	G	A	G	A	G	G	C	C	G
A	A	C	C	A	C	A	C	C	G	A	C
G	G	A	A	G	A	G	A	A	T	G	A
G	G	C	C	G	C	G	C	C	C	G	C
C	C	A	A	C	A	C	A	A	T	C	A
G	G	T	T	G	T	G	T	T	A	T	T
T	T	C	C	T	C	T	C	C	T	G	C
T	T	T	T	T	T	T	T	T	C	C	T
T	T	A	A	T	A	T	A	A	T	T	A
T	T	G	G	T	G	T	G	G	T	T	G
G	G	G	G	G	G	G	G	G	C	A	G
C	C	T	T	C	T	C	T	T	T	C	T
C	C	T	T	C	T	C	T	T	G	G	T
T	T	T	T	T	T	T	T	T	C	G	T
C	C	C	C	C	C	C	C	C	A	T	T
A	A	G	G	A	G	A	G	G	G	T	G
A	A	T	T	A	T	A	T	T	G	T	T
C	C	C	C	C	C	C	C	C	C	C	C
T	T	C	C	T	C	T	C	C	T	G	C
T	T	G	G	T	G	T	G	G	G	T	G
G	G	G	G	G	G	G	G	G	C	C	G
A	A	G	G	A	G	A	G	G	T	C	G
A	A	T	T	A	T	A	T	T	T	G	T
C	C	G	G	C	G	C	G	G	A	T	G
A	A	T	T	A	T	A	T	T	C	G	T
G	G	G	G	G	G	G	G	G	G	T	G
C	C	A	A	C	A	C	A	A	G	T	A
C	C	C	C	C	C	C	C	C	T	G	C
C	C	C	C	C	C	C	C	C	T	C	C
T	T	G	G	T	G	T	G	G	T	A	G
A	A	A	A	A	A	A	A	A	C	G	A
T	T	A	A	T	A	T	A	A	G	C	A
G	G	A	A	G	A	G	A	A	T	C	A
T	T	G	G	T	G	T	G	G	C	G	G
G	G	G	G	G	G	G	G	G	C	A	G
T	T	T	T	T	T	T	T	T	G	T	T
T	T	A	A	T	A	T	A	A	T	C	A
C	C	A	A	C	A	C	A	A	G	A	A
A	A	G	G	A	G	A	G	G	T	T	G
T	T	A	A	T	A	T	A	A	T	C	A
C	C	T	T	C	T	C	T	T	G	A	T
A	A	G	G	A	G	A	G	G	C	G	G
A	A	G	G	A	G	A	G	G	A	C	G
A	A	A	A	A	A	A	A	A	G	A	A
C	C	G	G	C	G	C	G	G	C	C	G
G	G	A	A	G	A	G	A	A	C	A	A
T	T	G	G	T	G	T	G	G	G	T	G
T	T	C	C	T	C	T	C	C	A	C	C
C	C	C	C	C	C	C	C	C	T	T	C
G	G	T	T	G	T	G	T	T	C	A	T
G	G	T	T	G	T	G	T	T	A	G	T
A	A	G	G	A	G	A	G	G	T	G	G
T	T	T	T	T	T	T	T	T	C	T	T
G	G	C	C	G	C	G	C	C	A	T	C
C	C	C	C	C	C	C	C	C	G	T	C
T	T	C	C	T	C	T	C	C	C	C	C
C	C	T	T	C	T	C	T	T	A	G	T
G	G	G	G	G	G	G	G	G	C	T	G
A	A	G	G	A	G	A	G	G	A	C	G
A	A	T	T	A	T	A	T	T	T	C	T
C	C	T	T	C	T	C	T	T	C	G	T
T	T	T	T	T	T	T	T	T	T	G	T
G	G	C	C	G	C	G	C	C	A	G	C
C	C	A	A	C	A	C	A	A	G	T	A
A	A	A	A	A	A	A	A	A	G	G	A
C	C	C	C	C	C	C	C	C	T	T	C
C	C	G	G	C	G	C	G	G	T	G	G
T	T	A	A	T	A	T	A	A	T	A	A
C	C	G	G	C	G	C	G	G	C	C	G
A	A	A	A	A	A	A	A	A	G	C	A
T	T	A	A	T	A	T	A	A	T	G	A
G	G	A	A	G	A	G	A	A	C	A	A
G	G	A	A	G	A	G	A	A	C	A	A
T	T	C	C	T	C	T	C	C	G	A	C
C	C	A	A	C	A	C	A	A	G	G	A
A	A	C	C	A	C	A	C	C	G	G	C
T	T	A	A	T	A	T	A	A	T	T	A
G	G	C	C	G	C	G	C	C	G	A	C
T	T	G	G	T	G	T	G	G	T	A	G
T	T	T	T	T	T	T	T	T	G	G	T
A	A	C	C	A	C	A	C	C	A	A	C
T	T	C	C	T	C	T	C	C	C	T	C
G	G	A	A	G	A	G	A	A	C	G	A
G	G	A	A	G	A	G	A	A	G	G	A
T	T	C	C	T	C	T	C	C	A	A	C
T	T	T	T	T	T	T	T	T	A	G	T
G	G	C	C	G	C	G	C	C	A	A	C
A	A	A	A	A	A	A	A	A	G	G	A
G	G	G	G	G	G	G	G	G	G	C	G
C	C	T	T	C	T	C	T	T	T	C	T
T	T	T	T	T	T	T	T	T	A	T	T
G	G	T	T	G	T	G	T	T	A	T	T
G	G	G	G	G	G	G	G	G	G	G	G
T	T	C	C	T	C	T	C	C	A	T	C
A	A	C	C	A	C	A	C	C	T	C	C
G	G	T	T	G	T	G	T	T	G	C	T
C	C	G	G	C	G	C	G	G	G	C	G
A	A	T	T	A	T	A	T	T	A	T	T
G	G	T	T	G	T	G	T	T	G	G	T
A	A	T	T	A	T	A	T	T	A	G	T
A	A	T	T	A	T	A	T	T	G	T	T
C	C	A	A	C	A	C	A	A	C	T	A
T	T	C	C	T	C	T	C	C	C	T	C
C	C	A	A	C	A	C	A	A	T	C	A
G	G	G	G	G	G	G	G	G	T	A	G
A	A	G	G	A	G	A	G	G	G	A	G
A	A	T	T	A	T	A	T	T	T	C	T
G	G	T	T	G	T	G	T	T	C	G	T
G	G	C	C	G	C	G	C	C	C	A	C
C	C	G	G	C	G	C	G	G	C	G	G
A	A	C	C	A	C	A	C	C	T	A	C
T	T	G	G	T	G	T	G	G	G	A	G
T	T	A	A	T	A	T	A	A	G	A	A
C	C	C	C	C	C	C	C	C	T	A	C
A	A	G	G	A	G	A	G	G	T	C	G
G	G	T	T	G	T	G	T	T	T	A	T
T	T	G	G	T	G	T	G	G	C	C	G
A	A	C	C	A	C	A	C	C	A	A	C
C	C	T	T	C	T	C	T	T	A	C	T
G	G	C	C	G	C	G	C	C	C	G	C
G	G	G	G	G	G	G	G	G	G	T	G
T	T	T	T	T	T	T	T	T	A	C	T
C	C	A	A	C	A	C	A	A	G	C	A
G	G	C	C	G	C	G	C	C	A	A	C
T	T	G	G	T	G	T	G	G	A	A	G
A	A	T	T	A	T	A	T	T	A	C	T
G	G	G	G	G	G	G	G	G	A	T	G
T	T	G	G	T	G	T	G	G	C	C	G
G	G	C	C	G	C	G	C	C	A	A	C
G	G	T	T	G	T	G	T	T	C	G	T
T	T	T	T	T	T	T	T	T	A	T	T
G	G	T	T	G	T	G	T	T	C	T	T
A	A	G	G	A	G	A	G	G	G	T	G
G	G	G	G	G	G	G	G	G	T	G	G
A	A	A	A	A	A	A	A	A	C	C	A
C	C	G	G	C	G	C	G	G	C	C	G
A	A	A	A	A	A	A	A	A	A	T	A
C	C	C	C	C	C	C	C	C	A	G	C
T	T	T	T	T	T	T	T	T	C	T	T
T	T	C	C	T	C	T	C	C	T	T	C
G	G	C	C	G	C	G	C	C	C	T	C
G	G	G	G	G	G	G	G	G	A	T	G
T	T	T	T	T	T	T	T	T	G	A	T
G	G	G	G	G	G	G	G	G	T	C	G
T	T	G	G	T	G	T	G	G	T	A	G
C	C	A	A	C	A	C	A	A	T	G	A
C	C	G	G	C	G	C	G	G	G	G	G
T	T	G	G	T	G	T	G	G	C	T	G
T	T	A	A	T	A	T	A	A	C	T	A
G	G	G	G	G	G	G	G	G	T	C	G
T	T	G	G	T	G	T	G	G	G	G	G
C	C	T	T	C	T	C	T	T	T	C	T
C	C	C	C	C	C	C	C	C	T	G	C
C	C	T	T	C	T	C	T	T	T	A	T
T	T	T	T	T	T	T	T	T	T	C	T
C	C	A	A	C	A	C	A	A	A	G	A
A	A	T	T	A	T	A	T	T	C	T	T
T	T	C	C	T	C	T	C	C	A	G	C
G	G	A	A	G	A	G	A	A	G	C	A
T	T	G	G	T	G	T	G	G	G	T	G
G	G	A	A	G	A	G	A	A	T	C	A
G	G	G	G	G	G	G	G	G	T	G	G
G	G	G	G	G	G	G	G	G	C	T	G
C	C	C	C	C	C	C	C	C	G	A	C
G	G	A	A	G	A	G	A	A	C	C	A
A	A	C	C	A	C	A	C	C	G	G	C
A	A	G	G	A	G	A	G	G	A	T	G
A	A	T	T	A	T	A	T	T	C	G	T
T	T	C	C	T	C	T	C	C	G	G	C
A	A	A	A	A	A	A	A	A	T	C	A
C	C	A	A	C	A	C	A	A	G	T	A
C	C	C	C	C	C	C	C	C	C	T	C
A	A	A	A	A	A	A	A	A	T	T	A
G	G	T	T	G	T	G	T	T	C	G	T
T	T	C	C	T	C	T	C	C	G	G	C
G	G	T	T	G	T	G	T	T	T	A	T
G	G	T	T	G	T	G	T	T	A	G	T
C	C	A	A	C	A	C	A	A	C	A	A
T	T	A	A	T	A	T	A	A	G	C	A
T	T	A	A	T	A	T	A	A	T	T	A
A	A	G	G	A	G	A	G	G	G	C	G
C	C	A	A	C	A	C	A	A	G	C	A
C	C	T	T	C	T	C	T	T	C	G	T
G	G	G	G	G	G	G	G	G	T	T	G
C	C	G	G	C	G	C	G	G	T	G	G
A	A	C	C	A	C	A	C	C	T	G	C
A	A	A	A	A	A	A	A	A	G	A	A
G	G	C	C	G	C	G	C	C	G	G	C
G	G	T	T	G	T	G	T	T	A	G	T
T	T	T	T	T	T	T	T	T	G	A	T
T	T	G	G	T	G	T	G	G	A	G	G
C	C	T	T	C	T	C	T	T	C	G	T
T	T	G	G	T	G	T	G	G	T	T	G
T	T	G	G	T	G	T	G	G	C	C	G
C	C	C	C	C	C	C	C	C	C	T	C
T	T	T	T	T	T	T	T	T	G	T	T
T	T	T	T	T	T	T	T	T	T	A	T
C	C	A	A	C	A	C	A	A	G	T	A
G	G	G	G	G	G	G	G	G	G	C	G
T	T	T	T	T	T	T	T	T	A	A	T
A	A	A	A	A	A	A	A	A	G	G	A
A	A	G	G	A	G	A	G	G	G	A	G
G	G	A	A	G	A	G	A	A	A	G	A
A	A	A	A	A	A	A	A	A	G	G	A
A	A	G	G	A	G	A	G	G	G	C	G
C	C	T	T	C	T	C	T	T	T	A	T
G	G	T	T	G	T	G	T	T	C	C	T
G	G	G	G	G	G	G	G	G	T	G	G
T	T	A	A	T	A	T	A	A	T	T	A
A	A	A	A	A	A	A	A	A	A	C	A
A	A	A	A	A	A	A	A	A	T	A	A
T	T	A	A	T	A	T	A	A	C	A	A
A	A	A	A	A	A	A	A	A	A	C	A
A	A	G	G	A	G	A	G	G	G	A	G
A	A	G	G	A	G	A	G	G	A	T	G
G	G	C	C	G	C	G	C	C	G	C	C
G	G	G	G	G	G	G	G	G	G	T	G
A	A	T	T	A	T	A	T	T	C	T	T
G	G	T	T	G	T	G	T	T	A	A	T
C	C	T	T	C	T	C	T	T	C	A	T
T	T	T	T	T	T	T	T	T	G	A	T
G	G	G	G	G	G	G	G	G	T	G	G
G	G	C	C	G	C	G	C	C	C	A	C
T	T	C	C	T	C	T	C	C	A	T	C
G	G	T	T	G	T	G	T	T	A	G	T
G	G	C	C	G	C	G	C	C	C	G	C
C	C	A	A	C	A	C	A	A	A	C	A
C	C	A	A	C	A	C	A	A	T	A	A
A	A	C	C	A	C	A	C	C	C	C	C
T	T	T	T	T	T	T	T	T	T	T	T
A	A	T	T	A	T	A	T	T	T	T	T
G	G	G	G	G	G	G	G	G	A	G	G
T	T	A	A	T	A	T	A	A	A	T	A
T	T	A	A	T	A	T	A	A	A	G	A
A	A	C	C	A	C	A	C	C	G	G	C
C	C	A	A	C	A	C	A	A	A	C	A
G	G	G	G	G	G	G	G	G	T	T	G
G	G	C	C	G	C	G	C	C	G	T	C
C	C	C	C	C	C	C	C	C	G	A	C
G	G	C	C	G	C	G	C	C	C	G	C
C	C	T	T	C	T	C	T	T	A	T	T
C	C	A	A	C	A	C	A	A	C	A	A
G	G	T	T	G	T	G	T	T	T	G	T
A	A	G	G	A	G	A	G	G	T	A	G
T	T	T	T	T	T	T	T	T	G	A	T
C	C	G	G	C	G	C	G	G	T	G	G
T	T	T	T	T	T	T	T	T	G	T	T
A	A	T	T	A	T	A	T	T	G	T	T
A	A	C	C	A	C	A	C	C	C	G	C
A	A	A	A	A	A	A	A	A	T	A	A
G	G	T	T	G	T	G	T	T	T	A	T
T	T	C	C	T	C	T	C	C	A	A	C
C	C	A	A	C	A	C	A	A	G	A	A
A	A	A	A	A	A	A	A	A	T	A	A
T	T	A	A	T	A	T	A	A	A	G	A
T	T	C	C	T	C	T	C	C	G	G	C
T	T	G	G	T	G	T	G	G	A	C	G
G	G	T	T	G	T	G	T	T	A	G	T
A	A	T	T	A	T	A	T	T	G	T	T
C	C	C	C	C	C	C	C	C	T	T	C
T	T	G	G	T	G	T	G	G	T	T	G
T	T	G	G	T	G	T	G	G	G	T	G
A	A	A	A	A	A	A	A	A	A	G	A
G	G	T	T	G	T	G	T	T	A	C	T
G	G	G	G	G	G	G	G	G	A	C	G
C	C	C	C	C	C	C	C	C	A	T	C
G	G	T	T	G	T	G	T	T	A	C	T
A	A	C	C	A	C	A	C	C	G	A	C
C	C	G	G	C	G	C	G	G	G	A	G
G	G	A	A	G	A	G	A	A	C	C	A
A	A	A	A	A	A	A	A	A	G	T	A
G	G	C	C	G	C	G	C	C	T	T	C
C	C	T	T	C	T	C	T	T	T	G	T
T	T	G	G	T	G	T	G	G	T	A	G
T	T	C	C	T	C	T	C	C	T	A	C
G	G	A	A	G	A	G	A	A	G	C	A
G	G	C	C	G	C	G	C	C	C	A	C
C	C	C	C	C	C	C	C	C	C	G	C
A	A	T	T	A	T	A	T	T	T	C	T
C	C	C	C	C	C	C	C	C	C	C	C
T	T	A	A	T	A	T	A	A	A	C	A
G	G	T	T	G	T	G	T	T	A	T	T
A	A	G	G	A	G	A	G	G	C	A	G
T	T	G	G	T	G	T	G	G	T	T	G
C	C	T	T	C	T	C	T	T	T	G	T
C	C	C	C	C	C	C	C	C	G	T	C
T	T	A	A	T	A	T	A	A	A	G	A
T	T	T	T	T	T	T	T	T	A	T	T
A	A	G	G	A	G	A	G	G	C	T	G
T	T	T	T	T	T	T	T	T	A	C	T
G	G	T	T	G	T	G	T	T	G	A	T
A	A	A	A	A	A	A	A	A	C	T	A
A	A	T	T	A	T	A	T	T	C	C	T
G	G	G	G	G	G	G	G	G	C	A	G
A	A	G	G	A	G	A	G	G	T	A	G
T	T	T	T	T	T	T	T	T	A	A	T
T	T	T	T	T	T	T	T	T	T	C	T
T	T	G	G	T	G	T	G	G	G	G	G
T	T	A	A	T	A	T	A	A	T	T	A
C	C	G	G	C	G	C	G	G	G	T	G
A	A	C	C	A	C	A	C	C	T	C	C
A	A	T	T	A	T	A	T	T	T	G	T
G	G	G	G	G	G	G	G	G	C	G	G
A	A	G	G	A	G	A	G	G	A	A	G
A	A	T	T	A	T	A	T	T	T	T	T
A	A	A	A	A	A	A	A	A	C	G	A
A	A	G	G	A	G	A	G	G	A	C	G
C	C	C	C	C	C	C	C	C	A	T	C
T	T	A	A	T	A	T	A	A	A	C	A
G	G	G	G	G	G	G	G	G	C	G	G
G	G	A	A	G	A	G	A	A	G	A	A
A	A	A	A	A	A	A	A	A	T	A	A
A	A	C	C	A	C	A	C	C	T	C	C
C	C	T	T	C	T	C	T	T	C	T	T
A	A	C	C	A	C	A	C	C	G	G	C
C	C	G	G	C	G	C	G	G	G	C	G
T	T	A	A	T	A	T	A	A	A	A	A
A	A	A	A	A	A	A	A	A	T	C	A
A	A	G	G	A	G	A	G	G	G	C	G
A	A	G	G	A	G	A	G	G	C	T	G
C	C	C	C	C	C	C	C	C	T	C	C
A	A	A	A	A	A	A	A	A	C	A	A
T	T	T	T	T	T	T	T	T	G	T	T
A	A	T	T	A	T	A	T	T	A	G	T
G	G	C	C	G	C	G	C	C	A	G	C
C	C	A	A	C	A	C	A	A	C	T	A
A	A	G	G	A	G	A	G	G	T	C	G
G	G	T	T	G	T	G	T	T	G	A	T
T	T	A	A	T	A	T	A	A	C	T	A
G	G	C	C	G	C	G	C	C	A	G	C
G	G	G	G	G	G	G	G	G	C	T	G
T	T	G	G	T	G	T	G	G	C	T	G
G	G	T	T	G	T	G	T	T	T	A	T
T	T	C	C	T	C	T	C	C	C	T	C
T	T	G	G	T	G	T	G	G	A	G	G
A	A	T	T	A	T	A	T	T	T	G	T
C	C	A	A	C	A	C	A	A	G	T	A
C	C	G	G	C	G	C	G	G	G	T	G
C	C	T	T	C	T	C	T	T	T	G	T
G	G	G	G	G	G	G	G	G	C	A	G
T	T	G	G	T	G	T	G	G	A	G	G
G	G	T	T	G	T	G	T	T	T	C	T
A	A	G	G	A	G	A	G	G	G	T	G
A	A	A	A	A	A	A	A	A	T	G	A
C	C	G	G	C	G	C	G	G	T	G	G
T	T	A	A	T	A	T	A	A	A	T	A
C	C	C	C	C	C	C	C	C	T	A	C
A	A	A	A	A	A	A	A	A	G	G	A
T	T	C	C	T	C	T	C	C	G	C	C
G	G	T	T	G	T	G	T	T	T	A	T
C	C	T	T	C	T	C	T	T	T	G	T
G	G	G	G	G	G	G	G	G	G	A	G
T	T	G	G	T	G	T	G	G	A	A	G
G	G	T	T	G	T	G	T	T	G	C	T
A	A	G	G	A	G	A	G	G	C	T	G
G	G	T	T	G	T	G	T	T	T	C	T
C	C	C	C	C	C	C	C	C	G	G	C
T	T	C	C	T	C	T	C	C	G	A	C
T	T	T	T	T	T	T	T	T	T	A	T
A	A	T	T	A	T	A	T	T	A	G	T
A	A	G	G	A	G	A	G	G	G	G	G
C	C	T	T	C	T	C	T	T	C	C	T
G	G	C	C	G	C	G	C	C	A	A	C
G	G	C	C	G	C	G	C	C	G	T	C
A	A	C	C	A	C	A	C	C	A	T	C
G	G	T	T	G	T	G	T	T	A	C	T
G	G	C	C	G	C	G	C	C	C	A	C
G	G	A	A	G	A	G	A	A	T	G	A
G	G	T	T	G	T	G	T	T	C	T	T
C	C	G	G	C	G	C	G	G	G	A	G
A	A	T	T	A	T	A	T	T	A	C	T
T	T	G	G	T	G	T	G	G	A	G	G
A	A	G	G	A	G	A	G	G	G	G	G
C	C	G	G	C	G	C	G	G	G	T	G
A	A	C	C	A	C	A	C	C	C	C	C
C	C	G	G	C	G	C	G	G	A	G	G
T	T	A	A	T	A	T	A	A	T	T	A
C	C	A	A	C	A	C	A	A	T	A	A
G	G	A	A	G	A	G	A	A	C	G	A
C	C	T	T	C	T	C	T	T	A	T	T
T	T	A	A	T	A	T	A	A	G	G	A
A	A	C	C	A	C	A	C	C	T	G	C
T	T	C	C	T	C	T	C	C	A	T	C
G	G	A	A	G	A	G	A	A	C	G	A
T	T	G	G	T	G	T	G	G	G	A	G
C	C	T	T	C	T	C	T	T	G	G	T
G	G	G	G	G	G	G	G	G	T	A	G
A	A	G	G	A	G	A	G	G	C	C	G
T	T	C	C	T	C	T	C	C	G	A	C
A	A	T	T	A	T	A	T	T	T	C	T
A	A	T	T	A	T	A	T	T	A	T	T
C	C	A	A	C	A	C	A	A	G	T	A
A	A	C	C	A	C	A	C	C	T	G	C
A	A	C	C	A	C	A	C	C	G	G	C
C	C	G	G	C	G	C	G	G	G	T	G
T	T	C	C	T	C	T	C	C	T	G	C
T	T	A	A	T	A	T	A	A	G	T	A
C	C	A	A	C	A	C	A	A	A	C	A
T	T	G	G	T	G	T	G	G	G	C	G
G	G	G	G	G	G	G	G	G	A	T	G
T	T	T	T	T	T	T	T	T	C	T	T
G	G	T	T	G	T	G	T	T	A	G	T
G	G	C	C	G	C	G	C	C	C	T	C
C	C	T	T	C	T	C	T	T	T	C	T
C	C	T	T	C	T	C	T	T	T	C	T
C	C	C	C	C	C	C	C	C	G	C	C
T	T	T	T	T	T	T	T	T	G	T	T
G	G	T	T	G	T	G	T	T	T	C	T
A	A	C	C	A	C	A	C	C	G	A	C
T	T	G	G	T	G	T	G	G	T	T	G
G	G	T	T	G	T	G	T	T	C	G	T
G	G	A	A	G	A	G	A	A	C	T	A
C	C	A	A	C	A	C	A	A	T	G	A
T	T	G	G	T	G	T	G	G	T	G	G
A	A	A	A	A	A	A	A	A	G	G	A
C	C	A	A	C	A	C	A	A	T	C	A
C	C	C	C	C	C	C	C	C	C	G	C
C	C	G	G	C	G	C	G	G	C	A	G
T	T	G	G	T	G	T	G	G	C	A	G
C	C	T	T	C	T	C	T	T	T	A	T
T	T	A	A	T	A	T	A	A	C	T	A
T	T	A	A	T	A	T	A	A	A	A	A
G	G	T	T	G	T	G	T	T	T	C	T
A	A	A	A	A	A	A	A	A	G	C	A
G	G	A	A	G	A	G	A	A	T	A	A
T	T	A	A	T	A	T	A	A	G	G	A
G	G	G	G	G	G	G	G	G	G	T	G
C	C	G	G	C	G	C	G	G	G	G	G
A	A	A	A	A	A	A	A	A	C	G	A
T	T	G	G	T	G	T	G	G	G	C	G
T	T	C	C	T	C	T	C	C	A	T	C
A	A	T	T	A	T	A	T	T	A	T	T
A	A	G	G	A	G	A	G	G	A	A	G
A	A	G	G	A	G	A	G	G	T	C	G
G	G	T	T	G	T	G	T	T	A	C	T
A	A	G	G	A	G	A	G	G	C	G	G
C	C	G	G	C	G	C	G	G	C	C	G
C	C	C	C	C	C	C	C	C	A	A	C
T	T	C	C	T	C	T	C	C	G	A	C
T	T	A	A	T	A	T	A	A	T	G	A
C	C	T	T	C	T	C	T	T	G	G	T
T	T	A	A	T	A	T	A	A	G	T	A
A	A	G	G	A	G	A	G	G	C	T	G
G	G	T	T	G	T	G	T	T	T	C	T
C	C	T	T	C	T	C	T	T	T	T	T
A	A	A	A	A	A	A	A	A	A	T	A
C	T	C	C	T	C	C	C	C	C	C	C
G	G	G	G	G	G	G	G	G	C	T	G
T	T	G	G	T	G	T	G	G	G	T	G
G	G	C	C	G	C	G	C	C	C	C	C
C	C	G	G	C	G	C	G	G	A	G	G
T	T	C	C	T	C	T	C	C	A	T	C
G	G	C	C	G	C	G	C	C	G	A	C
G	G	G	G	G	G	G	G	G	G	A	G
T	T	A	A	T	A	T	A	A	T	G	A
A	A	T	T	A	T	A	T	T	T	A	T
A	A	C	C	A	C	A	C	C	C	A	C
A	A	T	T	A	T	A	T	T	T	C	T
G	G	A	A	G	A	G	A	A	T	G	A
C	C	A	A	C	A	C	A	A	C	G	A
T	T	A	A	T	A	T	A	A	T	T	A
T	T	G	G	T	G	T	G	G	T	A	G
C	C	T	T	C	T	C	T	T	C	A	T
A	A	C	C	A	C	A	C	C	G	T	C
T	T	A	A	T	A	T	A	A	T	A	A
G	G	T	T	G	T	G	T	T	A	A	T
C	C	T	T	C	T	C	T	T	A	A	T
A	A	T	T	A	T	A	T	T	G	G	T
C	C	G	G	C	G	C	G	G	A	G	G
T	T	A	A	T	A	T	A	A	A	A	A
T	T	C	C	T	C	T	C	C	C	G	C
T	T	T	T	T	T	T	T	T	G	C	T
G	G	T	T	G	T	G	T	T	G	T	T
T	T	A	A	T	A	T	A	A	T	G	A
C	C	G	G	C	G	C	G	G	A	G	G
C	C	G	G	C	G	C	G	G	A	T	G
G	G	C	C	G	C	G	C	C	T	G	C
A	A	G	G	A	G	A	G	G	A	G	G
A	A	A	A	A	A	A	A	A	A	C	A
C	C	C	C	C	C	C	C	C	A	C	C
A	A	G	G	A	G	A	G	G	G	A	G
A	A	A	A	A	A	A	A	A	G	T	A
C	C	G	G	C	G	C	G	G	A	A	G
T	T	C	C	T	C	T	C	C	G	G	C
G	G	T	T	G	T	G	T	T	C	T	T
G	G	T	T	G	T	G	T	T	T	T	T
A	A	G	G	A	G	A	G	G	G	A	G
C	C	G	G	C	G	C	G	G	G	C	G
T	T	C	C	T	C	T	C	C	T	G	C
T	T	A	A	T	A	T	A	A	G	G	A
T	T	C	C	T	C	T	C	C	G	C	C
A	A	T	T	A	T	A	T	T	C	G	T
T	T	G	G	T	G	T	G	G	C	C	G
T	T	A	A	T	A	T	A	A	A	C	A
G	G	T	T	G	T	G	T	T	T	G	T
A	A	C	C	A	C	A	C	C	A	A	C
C	C	C	C	C	C	C	C	C	G	T	C
A	A	T	T	A	T	A	T	T	T	C	T
C	C	T	T	C	T	C	T	T	T	T	T
T	T	A	A	T	A	T	A	A	A	A	A
A	A	T	T	A	T	A	T	T	C	A	T
A	A	G	G	A	G	A	G	G	G	A	G
G	G	A	A	G	A	G	A	A	G	G	A
A	A	A	A	A	A	A	A	A	C	T	A
G	G	G	G	G	G	G	G	G	G	C	G
G	G	A	A	G	A	G	A	A	C	A	A
G	G	T	T	G	T	G	T	T	C	T	T
G	G	T	T	G	T	G	T	T	G	T	T
T	T	T	T	T	T	T	T	T	A	T	T
G	G	T	T	G	T	G	T	T	T	G	T
T	T	C	C	T	C	T	C	C	C	A	C
A	A	A	A	A	A	A	A	A	T	C	A
T	T	A	A	T	A	T	A	A	A	T	A
A	A	G	G	A	G	A	G	G	A	T	G
C	C	A	A	C	A	C	A	A	A	A	A
T	T	A	A	T	A	T	A	A	G	G	A
G	G	A	A	G	A	G	A	A	T	G	A
C	C	A	A	C	A	C	A	A	C	C	A
T	T	C	C	T	C	T	C	C	A	G	C
G	G	T	T	G	T	G	T	T	T	A	T
C	C	G	G	C	G	C	G	G	T	C	G
C	C	G	G	C	G	C	G	G	T	G	G
G	G	A	A	G	A	G	A	A	G	A	A
T	T	A	A	T	A	T	A	A	A	G	A
G	G	C	C	G	C	G	C	C	C	C	C
A	A	A	A	A	A	A	A	A	T	T	A
A	A	C	C	A	C	A	C	C	T	T	C
C	C	T	T	C	T	C	T	T	A	G	T
A	A	A	A	A	A	A	A	A	G	G	A
T	T	A	A	T	A	T	A	A	G	C	A
G	G	A	A	G	A	G	A	A	C	A	A
A	A	C	C	A	C	A	C	C	G	C	C
G	G	A	A	G	A	G	A	A	A	T	A
C	C	T	T	C	T	C	T	T	C	G	T
A	A	A	A	A	A	A	A	A	G	A	A
T	T	G	G	T	G	T	G	G	A	T	G
G	G	C	C	G	C	G	C	C	G	C	C
A	A	A	A	A	A	A	A	A	C	C	A
A	A	G	G	A	G	A	G	G	T	T	G
A	A	T	T	A	T	A	T	T	T	T	T
T	T	G	G	T	G	T	G	G	G	A	G
T	T	G	G	T	G	T	G	G	G	T	G
G	G	T	T	G	T	G	T	T	C	G	T
C	C	G	G	C	G	C	G	G	A	A	G
T	T	T	T	T	T	T	T	T	C	A	T
T	T	T	T	T	T	T	T	T	T	G	T
G	G	A	A	G	A	G	A	A	G	A	A
G	G	C	C	G	C	G	C	C	A	T	C
T	T	C	C	T	C	T	C	C	T	T	C
A	A	C	C	A	C	A	C	C	C	T	C
C	C	G	G	C	G	C	G	G	C	T	G
A	A	T	T	A	T	A	T	T	T	C	T
C	C	G	G	C	G	C	G	G	T	A	G
G	G	A	A	G	A	G	A	A	A	A	A
G	G	A	A	G	A	G	A	A	T	G	A
A	A	C	C	A	C	A	C	C	G	A	C
A	A	T	T	A	T	A	T	T	A	A	T
C	C	C	C	C	C	C	C	C	A	A	C
G	G	A	A	G	A	G	A	A	G	A	A
T	T	T	T	T	T	T	T	T	A	C	T
T	T	G	G	T	G	T	G	G	T	T	G
C	C	C	C	C	C	C	C	C	T	G	C
T	T	G	G	T	G	T	G	G	T	G	G
G	G	T	T	G	T	G	T	T	T	A	T
A	A	G	G	A	G	A	G	G	C	A	G
A	A	A	A	A	A	A	A	A	A	C	A
A	A	G	G	A	G	A	G	G	A	A	G
A	A	C	C	A	C	A	C	C	G	C	C
G	G	T	T	G	T	G	T	T	A	T	T
A	A	T	T	A	T	A	T	T	A	A	T
G	G	A	A	G	A	G	A	A	A	A	A
C	C	A	A	C	A	C	A	A	A	A	A
T	T	C	C	T	C	T	C	C	C	C	C
A	A	G	G	A	G	A	G	G	T	A	G
T	T	G	G	T	G	T	G	G	G	T	G
G	G	A	A	G	A	G	A	A	G	A	A
A	A	G	G	A	G	A	G	G	A	G	G
A	A	G	G	A	G	A	G	G	A	C	G
T	T	G	G	T	G	T	G	G	C	A	G
T	T	G	G	T	G	T	G	G	A	G	G
G	G	C	C	G	C	G	C	C	C	T	C
C	C	A	A	C	A	C	A	A	T	G	A
A	A	T	T	A	T	A	T	T	A	G	T
G	G	A	A	G	A	G	A	A	A	T	A
A	A	C	C	A	C	A	C	C	A	G	C
C	C	A	A	C	A	C	A	A	C	T	A
A	A	C	C	A	C	A	C	C	A	T	C
C	C	T	T	C	T	C	T	T	T	A	T
C	C	C	C	C	C	C	C	C	A	C	C
T	T	G	G	T	G	T	G	G	G	C	G
T	T	C	C	T	C	T	C	C	C	C	C
T	T	T	T	T	T	T	T	T	A	G	T
T	T	A	A	T	A	T	A	A	G	T	A
G	G	T	T	G	T	G	T	T	T	G	T
A	A	G	G	A	G	A	G	G	G	A	G
A	A	T	T	A	T	A	T	T	G	A	T
A	A	C	C	A	C	A	C	C	T	C	C
T	T	G	G	T	G	T	G	G	G	T	G
T	T	A	A	T	A	T	A	A	T	C	A
A	A	T	T	A	T	A	T	T	T	A	T
A	A	A	A	A	A	A	A	A	A	T	A
A	A	A	A	A	A	A	A	A	C	G	A
T	T	C	C	T	C	T	C	C	C	C	C
T	T	A	A	T	A	T	A	A	C	G	A
G	G	A	A	G	A	G	A	A	G	T	A
G	G	C	C	G	C	G	C	C	T	G	C
C	C	T	T	C	T	C	T	T	G	A	T
A	A	T	T	A	T	A	T	T	A	G	T
A	A	C	C	A	C	A	C	C	A	C	C
A	A	T	T	A	T	A	T	T	C	T	T
G	G	G	G	G	G	G	G	G	T	T	G
A	A	T	T	A	T	A	T	T	C	A	T
A	A	G	G	A	G	A	G	G	A	A	G
A	A	G	G	A	G	A	G	G	T	C	G
T	T	C	C	T	C	T	C	C	G	G	C
T	T	C	C	T	C	T	C	C	C	G	C
T	T	C	C	T	C	T	C	C	G	A	C
G	G	T	T	G	T	G	T	T	T	G	T
A	A	G	G	A	G	A	G	G	G	G	G
C	C	A	A	C	A	C	A	A	A	G	A
A	A	T	T	A	T	A	T	T	G	G	T
C	C	G	G	C	G	C	G	G	C	C	G
C	C	G	G	C	G	C	G	G	T	A	G
T	T	C	C	T	C	T	C	C	T	T	C
T	T	T	T	T	T	T	T	T	A	A	T
C	C	A	A	C	A	C	A	A	A	C	A
A	A	C	C	A	C	A	C	C	C	A	C
A	A	C	C	A	C	A	C	C	G	C	C
T	T	C	C	T	C	T	C	C	G	T	C
G	G	T	T	G	T	G	T	T	A	C	T
G	G	C	C	G	C	G	C	C	G	G	C
G	G	T	T	G	T	G	T	T	G	C	T
G	G	T	T	G	T	G	T	T	G	T	T
A	A	G	G	A	G	A	G	G	G	A	G
A	A	A	A	A	A	A	A	A	C	T	A
T	T	G	G	T	G	T	G	G	A	G	G
G	G	T	T	G	T	G	T	T	T	T	T
T	T	G	G	T	G	T	G	G	A	C	G
C	C	C	C	C	C	C	C	C	C	G	C
C	C	A	A	C	A	C	A	A	A	A	A
A	A	T	T	A	T	A	T	T	C	T	T
A	A	T	T	A	T	A	T	T	T	A	T
A	A	A	A	A	A	A	A	A	C	A	A
T	T	A	A	T	A	T	A	A	G	C	A
T	T	A	A	T	A	T	A	A	C	A	A
T	T	G	G	T	G	T	G	G	T	A	G
T	T	A	A	T	A	T	A	A	A	C	A
G	G	C	C	G	C	G	C	C	T	T	C
T	T	C	C	T	C	T	C	C	G	T	C
A	A	T	T	A	T	A	T	T	T	C	T
T	T	T	T	T	T	T	T	T	C	T	T
T	T	C	C	T	C	T	C	C	G	G	C
T	T	T	T	T	T	T	T	T	A	T	T
C	C	A	A	C	A	C	A	A	T	G	A
C	C	G	G	C	G	C	G	G	A	G	G
C	C	C	C	C	C	C	C	C	A	C	C
T	T	A	A	T	A	T	A	A	C	C	A
T	T	C	C	T	C	T	C	C	A	C	C
A	A	G	G	A	G	A	G	G	A	T	G
A	A	T	T	A	T	A	T	T	C	G	T
A	A	G	G	A	G	A	G	G	T	A	G
T	T	C	C	T	C	T	C	C	T	T	C
T	T	T	T	T	T	T	T	T	C	G	T
C	C	G	G	C	G	C	G	G	T	G	G
C	C	G	G	C	G	C	G	G	G	C	G
A	A	T	T	A	T	A	T	T	T	T	T
T	T	A	A	T	A	T	A	A	G	A	A
A	A	A	A	A	A	A	A	A	G	C	A
A	A	A	A	A	A	A	A	A	C	C	A
T	T	G	G	T	G	T	G	G	C	C	G
C	C	C	C	C	C	C	C	C	C	T	C
A	A	T	T	A	T	A	T	T	T	C	T
A	A	T	T	A	T	A	T	T	G	T	T
G	G	C	C	G	C	G	C	C	A	T	C
A	A	A	A	A	A	A	A	A	T	G	A
C	C	T	T	C	T	C	T	T	G	A	T
T	T	G	G	T	G	T	G	G	G	G	G
A	A	C	C	A	C	A	C	C	C	T	C
T	T	A	A	T	A	T	A	A	T	G	A
T	T	C	C	T	C	T	C	C	A	C	C
C	C	T	T	C	T	C	T	T	C	A	T
A	A	T	T	A	T	A	T	T	C	T	T
A	A	T	T	A	T	A	T	T	C	T	T
C	C	G	G	C	G	C	G	G	T	A	G
C	C	T	T	C	T	C	T	T	C	A	T
A	A	C	C	A	C	A	C	C	T	A	C
A	A	C	C	A	C	A	C	C	T	G	C
G	G	G	G	G	G	G	G	G	G	A	G
G	G	A	A	G	A	G	A	A	A	C	A
G	G	A	A	G	A	G	A	A	G	C	A
T	T	C	C	T	C	T	C	C	T	T	C
T	T	A	A	T	A	T	A	A	G	T	A
G	G	A	A	G	A	G	A	A	C	C	A
A	A	C	C	A	C	A	C	C	A	T	C
A	A	T	T	A	T	A	T	T	T	A	T
A	A	G	G	A	G	A	G	G	T	G	G
A	A	G	G	A	G	A	G	G	A	C	G
G	G	A	A	G	A	G	A	A	A	A	A
A	A	C	C	A	C	A	C	C	A	C	C
A	A	T	T	A	T	A	T	T	G	G	T
A	A	T	T	A	T	A	T	T	A	T	T
A	A	T	T	A	T	A	T	T	C	G	T
A	A	A	A	A	A	A	A	A	C	C	A
G	G	T	T	G	T	G	T	T	T	T	T
C	C	T	T	C	T	C	T	T	T	G	T
T	T	G	G	T	G	T	G	G	C	G	G
T	T	A	A	T	A	T	A	A	T	T	A
G	G	C	C	G	C	G	C	C	A	A	C
A	A	A	A	A	A	A	A	A	G	A	A
T	T	C	C	T	C	T	C	C	C	A	C
G	G	T	T	G	T	G	T	T	A	G	T
G	G	A	A	G	A	G	A	A	C	C	A
C	C	A	A	C	A	C	A	A	G	T	A
T	T	G	G	T	G	T	G	G	T	T	G
T	T	A	A	T	A	T	A	A	G	C	A
T	T	G	G	T	G	T	G	G	C	A	G
A	A	G	G	A	G	A	G	G	T	T	G
T	T	G	G	T	G	T	G	G	G	G	G
G	G	G	G	G	G	G	G	G	G	C	G
G	G	T	T	G	T	G	T	T	T	A	T
G	G	G	G	G	G	G	G	G	A	C	G
T	T	T	T	T	T	T	T	T	A	T	T
A	A	A	A	A	A	A	A	A	A	T	A
G	G	T	T	G	T	G	T	T	G	T	T
A	A	A	A	A	A	A	A	A	C	G	A
A	A	C	C	A	C	A	C	C	T	T	C
T	T	T	T	T	T	T	T	T	T	C	T
T	T	G	G	T	G	T	G	G	C	C	G
C	C	C	C	C	C	C	C	C	A	G	C
G	G	T	T	G	T	G	T	T	T	A	T
A	A	G	G	A	G	A	G	G	G	A	G
T	T	C	C	T	C	T	C	C	C	C	C
C	C	C	C	C	C	C	C	C	A	A	C
T	T	G	G	T	G	T	G	G	C	A	G
G	G	T	T	G	T	G	T	T	T	C	T
T	T	G	G	T	G	T	G	G	T	T	G
C	C	A	A	C	A	C	A	A	T	G	A
T	T	A	A	T	A	T	A	A	G	G	A
A	A	C	C	A	C	A	C	C	T	A	C
T	T	A	A	T	A	T	A	A	C	C	A
C	C	T	T	C	T	C	T	T	C	T	T
C	C	G	G	C	G	C	G	G	G	T	G
A	A	A	A	A	A	A	A	A	A	T	A
G	G	G	G	G	G	G	G	G	A	A	G
T	T	C	C	T	C	T	C	C	C	T	C
T	T	A	A	T	A	T	A	A	A	T	A
G	G	T	T	G	T	G	T	T	A	G	T
C	C	G	G	C	G	C	G	G	C	A	G
G	G	A	A	G	A	G	A	A	T	C	A
T	T	A	A	T	A	T	A	A	G	A	A
C	C	A	A	C	A	C	A	A	G	C	A
A	A	T	T	A	T	A	T	T	A	T	T
C	C	T	T	C	T	C	T	T	C	A	T
C	C	G	G	C	G	C	G	G	T	A	G
A	A	C	C	A	C	A	C	C	T	G	C
A	A	T	T	A	T	A	T	T	T	A	T
A	A	T	T	A	T	A	T	T	A	G	T
T	T	G	G	T	G	T	G	G	T	G	G
G	G	G	G	G	G	G	G	G	T	G	G
A	A	T	T	A	T	A	T	T	G	G	T
A	A	A	A	A	A	A	A	A	A	T	A
T	T	C	C	T	C	T	C	C	C	G	C
G	G	A	A	G	A	G	A	A	A	T	A
C	C	C	C	C	C	C	C	C	C	A	C
A	A	G	G	A	G	A	G	G	T	T	G
A	A	G	G	A	G	A	G	G	A	A	G
C	C	A	A	C	A	C	A	A	A	C	A
C	C	A	A	C	A	C	A	A	G	T	A
A	A	C	C	A	C	A	C	C	A	G	C
A	A	G	G	A	G	A	G	G	G	C	G
A	A	T	T	A	T	A	T	T	G	T	T
T	T	T	T	T	T	T	T	T	G	G	T
G	G	C	C	G	C	G	C	C	G	C	C
T	T	T	T	T	T	T	T	T	T	C	T
G	G	G	G	G	G	G	G	G	G	G	G
C	C	A	A	C	A	C	A	A	T	T	A
C	C	A	A	C	A	C	A	A	A	G	A
T	T	A	A	T	A	T	A	A	T	A	A
T	T	A	A	T	A	T	A	A	A	A	A
T	T	G	G	T	G	T	G	G	C	C	G
C	C	A	A	C	A	C	A	A	T	A	A
A	A	G	G	A	G	A	G	G	G	T	G
A	A	C	C	A	C	A	C	C	C	G	C
C	C	T	T	C	T	C	T	T	T	A	T
T	T	A	A	T	A	T	A	A	G	G	A
C	C	T	T	C	T	C	T	T	C	C	T
T	T	G	G	T	G	T	G	G	C	A	G
C	C	A	A	C	A	C	A	A	G	T	A
A	A	A	A	A	A	A	A	A	T	G	A
T	T	T	T	T	T	T	T	T	G	A	T
G	G	T	T	G	T	G	T	T	A	A	T
A	A	G	G	A	G	A	G	G	A	A	G
A	A	C	C	A	C	A	C	C	C	T	C
G	G	A	A	G	A	G	A	A	A	T	A
T	T	G	G	T	G	T	G	G	T	G	G
G	G	A	A	G	A	G	A	A	G	C	A
T	T	C	C	T	C	T	C	C	A	T	C
G	G	A	A	G	A	G	A	A	G	T	A
A	A	C	C	A	C	A	C	C	C	G	C
T	T	C	C	T	C	T	C	C	A	G	C
C	C	T	T	C	T	C	T	T	T	T	T
A	A	T	T	A	T	A	T	T	G	A	T
T	T	T	T	T	T	T	T	T	A	C	T
T	T	T	T	T	T	T	T	T	A	A	T
G	G	G	G	G	G	G	G	G	A	C	G
T	T	A	A	T	A	T	A	A	T	G	A
G	G	A	A	G	A	G	A	A	T	G	A
G	G	A	A	G	A	G	A	A	G	A	A
T	T	T	T	T	T	T	T	T	C	A	T
G	G	T	T	G	T	G	T	T	T	C	T
A	A	A	A	A	A	A	A	A	T	G	A
A	A	A	A	A	A	A	A	A	G	T	A
A	A	A	A	A	A	A	A	A	G	T	A
C	C	T	T	C	T	C	T	T	T	C	T
T	T	T	T	T	T	T	T	T	A	T	T
T	T	G	G	T	G	T	G	G	C	G	G
C	C	G	G	C	G	C	G	G	A	A	G
A	A	C	C	A	C	A	C	C	C	A	C
T	T	A	A	T	A	T	A	A	G	A	A
G	G	A	A	G	A	G	A	A	G	A	A
G	G	A	A	G	A	G	A	A	A	G	A
C	C	G	G	C	G	C	G	G	A	A	G
A	A	A	A	A	A	A	A	A	C	G	A
G	G	A	A	G	A	G	A	A	G	C	A
A	A	A	A	A	A	A	A	A	T	T	A
C	C	T	T	C	T	C	T	T	T	A	T
G	G	T	T	G	T	G	T	T	C	T	T
G	G	T	T	G	T	G	T	T	T	G	T
G	G	G	G	G	G	G	G	G	G	A	G
C	C	A	A	C	A	C	A	A	A	A	A
G	G	C	C	G	C	G	C	C	A	T	C
A	A	A	A	A	A	A	A	A	A	T	A
T	T	C	C	T	C	T	C	C	A	G	C
T	T	C	C	T	C	T	C	C	G	C	C
T	T	T	T	T	T	T	T	T	A	A	T
T	T	T	T	T	T	T	T	T	G	G	T
G	G	C	C	G	C	G	C	C	C	A	C
T	T	A	A	T	A	T	A	A	T	C	A
T	T	A	A	T	A	T	A	A	A	A	A
A	A	T	T	A	T	A	T	T	T	C	T
A	A	G	G	A	G	A	G	G	G	C	G
A	A	G	G	A	G	A	G	G	A	T	G
G	G	G	G	G	G	G	G	G	A	T	G
C	C	G	G	C	G	C	G	G	T	T	G
C	C	A	A	C	A	C	A	A	T	T	A
A	A	A	A	A	A	A	A	A	G	G	A
C	C	T	T	C	T	C	T	T	C	A	T
T	T	G	G	T	G	T	G	G	A	A	G
T	T	T	T	T	T	T	T	T	G	A	T
G	G	C	C	G	C	G	C	C	A	T	C
C	C	C	C	C	C	C	C	C	C	T	C
G	G	A	A	G	A	G	A	A	A	A	A
A	A	A	A	A	A	A	A	A	C	A	A
A	A	A	A	A	A	A	A	A	C	A	A
T	T	T	T	T	T	T	T	T	T	T	T
T	T	T	T	T	T	T	T	T	T	T	T
T	T	T	T	T	T	T	T	T	T	G	T
T	T	T	T	T	T	T	T	T	T	G	T
G	G	G	G	G	G	G	G	G	G	C	G
T	T	T	T	T	T	T	T	T	A	A	T
G	G	A	A	G	A	G	A	A	A	A	A
G	G	T	T	G	T	G	T	T	A	A	T
C	C	T	T	C	T	C	T	T	T	G	T
A	A	T	T	A	T	A	T	T	T	A	T
C	C	C	C	C	C	C	C	C	A	A	C
T	T	C	C	T	C	T	C	C	A	A	C
G	G	C	C	G	C	G	C	C	A	T	C
A	A	T	T	A	T	A	T	T	T	T	T
G	G	T	T	G	T	G	T	T	T	T	T
A	A	A	A	A	A	A	A	A	G	G	A
A	A	A	A	A	A	A	A	A	G	A	A
T	T	A	A	T	A	T	A	A	C	C	A
T	T	T	T	T	T	T	T	T	A	A	T
T	T	T	T	T	T	T	T	T	A	C	T
G	G	C	C	G	C	G	C	C	A	C	C
A	A	C	C	A	C	A	C	C	G	T	C
C	C	A	A	C	A	C	A	A	A	T	A
T	T	T	T	T	T	T	T	T	A	C	T
A	A	A	A	A	A	A	A	A	A	A	A
A	A	A	A	A	A	A	A	A	T	A	A
A	A	T	T	A	T	A	T	T	T	T	T
G	G	C	C	G	C	G	C	C	T	G	C
A	A	A	A	A	A	A	A	A	G	G	A
A	A	A	A	A	A	A	A	A	A	G	A
G	G	G	G	G	G	G	G	G	C	G	G
G	G	A	A	G	A	G	A	A	A	A	A
T	T	C	C	T	C	T	C	C	C	A	C
G	G	T	T	G	T	G	T	T	C	T	T
C	C	A	A	C	A	C	A	A	T	G	A
C	C	T	T	C	T	C	T	T	T	T	T
A	A	T	T	A	T	A	T	T	C	C	T
C	C	C	C	C	C	C	C	C	A	C	C
T	T	A	A	T	A	T	A	A	A	A	A
A	A	A	A	A	A	A	A	A	T	A	A
C	C	C	C	C	C	C	C	C	G	A	C
T	T	C	C	T	C	T	C	C	G	T	C
T	T	A	A	T	A	T	A	A	G	T	A
G	G	A	A	G	A	G	A	A	G	T	A
T	T	G	G	T	G	T	G	G	A	T	G
G	G	G	G	G	G	G	G	G	A	G	G
G	G	G	G	G	G	G	G	G	T	T	G
T	T	T	T	T	T	T	T	T	G	A	T
T	T	T	T	T	T	T	T	T	T	T	T
A	A	G	G	A	G	A	G	G	C	T	G
C	C	A	A	C	A	C	A	A	C	T	A
T	T	A	A	T	A	T	A	A	A	C	A
T	T	A	A	T	A	T	A	A	A	C	A
A	A	A	A	A	A	A	A	A	A	C	A
C	C	G	G	C	G	C	G	G	T	T	G
C	C	A	A	C	A	C	A	A	T	T	A
C	C	A	A	C	A	C	A	A	T	A	A
C	C	A	A	C	A	C	A	A	T	A	A
A	A	A	A	A	A	A	A	A	G	A	A
A	A	A	A	A	A	A	A	A	T	T	A
A	A	G	G	A	G	A	G	G	A	T	G
A	A	C	C	A	C	A	C	C	T	C	C
T	T	T	T	T	T	T	T	T	T	C	T
G	G	T	T	G	T	G	T	T	T	A	T
C	C	G	G	C	G	C	G	G	C	T	G
T	T	A	A	T	A	T	A	A	C	A	A
G	G	T	T	G	T	G	T	T	C	A	T
T	T	G	G	T	G	T	G	G	T	T	G
T	T	G	G	T	G	T	G	G	T	C	G
G	G	C	C	G	C	G	C	C	A	A	C
T	T	T	T	T	T	T	T	T	A	A	T
T	T	T	T	T	T	T	T	T	A	G	T
A	A	T	T	A	T	A	T	T	T	A	T
A	A	A	A	A	A	A	A	A	T	C	A
A	A	T	T	A	T	A	T	T	C	T	T
A	A	G	G	A	G	A	G	G	C	A	G
T	T	G	G	T	G	T	G	G	A	T	G
T	T	G	G	T	G	T	G	G	T	T	G
T	T	T	T	T	T	T	T	T	A	C	T
A	A	A	A	A	A	A	A	A	A	A	A
T	T	G	G	T	G	T	G	G	T	A	G
T	T	A	A	T	A	T	A	A	C	C	A
G	G	A	A	G	A	G	A	A	A	C	A
T	T	T	T	T	T	T	T	T	A	A	T
C	C	T	T	C	T	C	T	T	G	A	T
C	C	C	C	C	C	C	C	C	A	G	C
A	A	G	G	A	G	A	G	G	C	G	G
G	G	A	A	G	A	G	A	A	T	G	A
C	C	T	T	C	T	C	T	T	A	T	T
A	A	C	C	A	C	A	C	C	T	T	C
T	T	T	T	T	T	T	T	T	T	G	T
G	G	G	G	G	G	G	G	G	C	A	G
T	T	T	T	T	T	T	T	T	A	A	T
C	C	C	C	C	C	C	C	C	A	A	C
A	A	T	T	A	T	A	T	T	C	A	T
C	C	A	A	C	A	C	A	A	C	G	A
A	A	T	T	A	T	A	T	T	A	A	T
A	A	C	C	A	C	A	C	C	A	A	C
T	T	C	C	T	C	T	C	C	G	A	C
T	T	A	A	T	A	T	A	A	G	A	A
C	C	G	G	C	G	C	G	G	G	A	G
A	A	T	T	A	T	A	T	T	T	G	T
G	G	T	T	G	T	G	T	T	T	C	T
A	A	G	G	A	G	A	G	G	G	T	G
A	A	C	C	A	C	A	C	C	A	T	C
A	A	G	G	A	G	G	G	G	A	G	G
T	T	T	T	T	T	T	T	T	A	A	T
A	A	C	C	A	C	A	C	C	A	T	C
G	G	A	A	G	A	G	A	A	G	G	A
G	G	C	C	G	C	G	C	C	A	G	C
A	A	C	C	A	C	A	C	C	A	C	C
C	C	A	A	C	A	C	A	A	A	T	A
C	C	A	A	C	A	C	A	A	A	T	A
T	T	A	A	T	A	T	A	A	A	T	A
G	G	T	T	G	T	G	T	T	G	A	T
A	A	G	G	A	G	A	G	G	C	T	G
G	G	A	A	G	A	G	A	A	T	G	A
C	C	A	A	C	A	C	A	A	T	G	A
A	A	T	T	A	T	A	T	T	G	G	T
T	T	G	G	T	G	T	G	G	A	T	G
A	A	C	C	A	C	A	C	C	T	A	C
G	G	A	A	G	A	G	A	A	G	G	A
T	T	A	A	T	A	T	A	A	G	A	A
C	C	C	C	C	C	C	C	C	C	A	C
T	T	C	C	T	C	T	C	C	T	T	C
T	T	A	A	T	A	T	A	A	T	T	A
G	G	A	A	G	A	G	A	A	T	C	A
C	C	A	A	C	A	C	A	A	A	G	A
C	C	T	T	C	T	C	T	T	T	A	T
G	G	G	G	G	G	G	G	G	G	T	G
A	A	T	T	A	T	A	T	T	G	C	T
A	A	G	G	A	G	A	G	G	G	T	G
T	T	C	C	T	C	T	C	C	T	G	C
A	A	C	C	A	C	A	C	C	A	T	C
C	C	T	T	C	T	C	T	T	G	C	T
C	C	T	T	C	T	C	T	T	A	T	T
A	A	T	T	A	T	A	T	T	A	A	T
T	T	C	C	T	C	T	C	C	T	T	C
A	A	A	A	A	A	A	A	A	T	C	A
A	A	A	A	A	A	A	A	A	C	C	A
T	T	C	C	T	C	T	C	C	G	A	C
G	G	T	T	G	T	G	T	T	A	G	T
A	A	C	C	A	C	A	C	C	T	T	C
A	A	T	T	A	T	A	T	T	C	T	T
T	T	C	C	T	C	T	C	C	T	G	C
C	C	A	A	C	A	C	A	A	G	C	A
T	T	T	T	T	T	T	T	T	T	G	T
G	G	G	G	G	G	G	G	G	C	T	G
G	G	A	A	G	A	G	A	A	T	C	A
C	C	A	A	C	A	C	A	A	A	A	A
T	T	G	G	T	G	T	G	G	T	C	G
T	T	T	T	T	T	T	T	T	C	C	T
G	G	G	G	G	G	G	G	G	C	A	G
A	A	T	T	A	T	A	T	T	A	A	T
A	A	G	G	A	G	A	G	G	G	A	G
A	A	A	A	A	A	A	A	A	T	T	A
A	A	T	T	A	T	A	T	T	T	G	T
C	C	C	C	C	C	C	C	C	G	A	C
C	C	A	A	C	A	C	A	A	C	A	A
A	A	T	T	A	T	A	T	T	G	T	T
T	T	T	T	T	T	T	T	T	T	G	T
T	T	G	G	T	G	T	G	G	C	C	G
C	C	T	T	C	T	C	T	T	A	A	T
T	T	G	G	T	G	T	G	G	C	A	G
T	T	G	G	T	G	T	G	G	C	C	G
C	C	T	T	C	T	C	T	T	A	C	T
G	G	G	G	G	G	G	G	G	A	A	G
T	T	A	A	T	A	T	A	A	A	A	A
A	A	A	A	A	A	A	A	A	T	A	A
A	A	A	A	A	A	A	A	A	G	T	A
G	G	C	C	G	C	G	C	C	A	G	C
G	G	T	T	G	T	G	T	T	A	T	T
G	G	T	T	G	T	G	T	T	T	G	T
T	T	C	C	T	C	T	C	C	G	C	C
G	G	A	A	G	A	G	A	A	C	C	A
G	G	T	T	G	T	G	T	T	A	T	T
T	T	G	G	T	G	T	G	G	A	T	G
C	C	G	G	C	G	C	G	G	C	T	G
G	G	C	C	G	C	G	C	C	C	C	C
C	C	A	A	C	A	C	A	A	A	A	A
A	A	G	G	A	G	A	G	G	A	A	G
C	C	A	A	C	A	C	A	A	A	C	A
T	T	C	C	T	C	T	C	C	T	T	C
A	A	G	G	A	G	A	G	G	G	C	G
T	T	G	G	T	G	T	G	G	T	T	G
T	T	G	G	T	G	T	G	G	G	C	G
G	G	C	C	G	C	G	C	C	C	A	C
C	C	G	G	C	G	C	G	G	C	T	G
C	C	A	A	C	A	C	A	A	T	G	A
T	T	T	T	T	T	T	T	T	T	A	T
T	T	T	T	T	T	T	T	T	T	A	T
T	T	T	T	T	T	T	T	T	C	G	T
G	G	T	T	G	T	G	T	T	A	T	T
G	G	G	G	G	G	G	G	G	A	G	G
A	A	T	T	A	T	A	T	T	C	T	T
G	G	T	T	G	T	G	T	T	T	G	T
G	G	A	A	G	A	G	A	A	C	A	A
C	C	A	A	C	A	C	A	A	T	T	A
T	T	A	A	T	A	T	A	A	C	C	A
G	G	G	G	G	G	G	G	G	A	A	G
T	T	C	C	T	C	T	C	C	T	T	C
G	G	C	C	G	C	G	C	C	G	T	C
T	T	A	A	T	A	T	A	A	A	G	A
G	G	C	C	G	C	G	C	C	A	T	C
T	T	T	T	T	T	T	T	T	G	G	T
T	T	T	T	T	T	T	T	T	T	G	T
C	C	G	G	C	G	C	G	G	G	T	G
T	T	C	C	T	C	T	C	C	T	G	C
C	C	G	G	C	G	C	G	G	G	A	G
T	T	A	A	T	A	T	A	A	A	A	A
T	T	A	A	T	A	T	A	A	T	A	A
A	A	T	T	A	T	A	T	T	C	C	T
T	T	T	T	T	T	T	T	T	A	T	T
G	G	T	T	G	T	G	T	T	T	T	T
T	T	T	T	T	T	T	T	T	T	C	T
T	T	G	G	T	G	T	G	G	G	A	G
G	G	T	T	G	T	G	T	T	T	T	T
G	G	G	G	G	G	G	G	G	G	G	G
T	T	G	G	T	G	T	G	G	G	G	G
T	T	C	C	T	C	T	C	C	T	C	C
G	G	A	A	G	A	G	A	A	G	A	A
C	C	C	C	C	C	C	C	C	A	G	C
C	C	T	T	C	T	C	T	T	A	A	T
A	A	G	G	A	G	A	G	G	A	C	G
T	T	A	A	T	A	T	A	A	C	G	A
A	A	G	G	A	G	A	G	G	T	G	G
A	A	A	A	A	A	A	A	A	T	G	A
C	C	A	A	C	A	C	A	A	C	C	A
A	A	T	T	A	T	A	T	T	A	G	T
A	A	T	T	A	T	A	T	T	T	A	T
G	G	T	T	G	T	G	T	T	G	T	T
T	T	G	G	T	G	T	G	G	G	T	G
G	G	A	A	G	A	G	A	A	C	T	A
T	T	C	C	T	C	T	C	C	A	T	C
G	G	T	T	G	T	G	T	T	G	G	T
C	C	A	A	C	A	C	A	A	A	T	A
C	C	A	A	C	A	C	A	A	C	T	A
T	T	A	A	T	A	T	A	A	G	A	A
A	A	G	G	A	G	A	G	G	G	A	G
T	T	A	A	T	A	T	A	A	G	A	A
T	T	A	A	T	A	T	A	A	C	G	A
G	G	G	G	G	G	G	G	G	G	C	G
G	G	G	G	G	G	G	G	G	A	C	G
G	G	T	T	G	T	G	T	T	T	A	T
T	T	G	G	T	G	T	G	G	T	C	G
T	T	C	C	T	C	T	C	C	T	T	C
C	C	C	C	C	C	C	C	C	T	T	C
C	C	A	A	C	A	C	A	A	G	G	A
A	A	C	C	A	C	A	C	C	T	C	C
C	C	T	T	C	T	C	T	T	T	G	T
G	G	A	A	G	A	G	A	A	A	A	A
T	T	C	C	T	C	T	C	C	A	A	C
G	G	T	T	G	T	G	T	T	A	T	T
C	C	T	T	C	T	C	T	T	G	T	T
T	T	G	G	T	G	T	G	G	C	T	G
A	A	T	T	A	T	A	T	T	C	T	T
G	G	G	G	G	G	G	G	G	A	G	G
C	C	G	G	C	G	C	G	G	C	T	G
G	G	T	T	G	T	G	T	T	T	G	T
C	C	T	T	C	T	C	T	T	T	G	T
T	T	A	A	T	A	T	A	A	G	C	A
A	A	C	C	A	C	A	C	C	C	A	C
A	A	T	T	A	T	A	T	T	G	C	T
C	C	T	T	C	T	C	T	T	A	T	T
A	A	A	A	A	A	A	A	A	A	G	A
T	T	C	C	T	C	T	C	C	T	A	C
A	A	C	C	A	C	A	C	C	T	G	C
G	G	C	C	G	C	G	C	C	T	A	C
G	G	C	C	G	C	G	C	C	T	A	C
T	T	A	A	T	A	T	A	A	G	T	A
T	T	A	A	T	A	T	A	A	T	T	A
G	G	A	A	G	A	G	A	A	G	T	A
T	T	A	A	T	A	T	A	A	G	G	A
A	A	T	T	A	T	A	T	T	C	A	T
A	A	G	G	A	G	A	G	G	A	C	G
C	C	C	C	C	C	C	C	C	C	T	C
C	C	T	T	C	T	C	T	T	T	A	T
A	A	G	G	A	G	A	G	G	G	A	G
T	T	T	T	T	T	T	T	T	A	A	T
A	A	T	T	A	T	A	T	T	G	G	T
C	C	G	G	C	G	C	G	G	A	A	G
A	A	T	T	A	T	A	T	T	A	A	T
G	G	T	T	G	T	G	T	T	T	G	T
G	G	A	A	G	A	G	A	A	T	G	A
T	T	A	A	T	A	T	A	A	T	T	A
G	G	A	A	G	A	G	A	A	G	G	A
T	T	A	A	T	A	T	A	A	A	C	A
T	T	T	T	T	T	T	T	T	C	C	T
G	G	T	T	G	T	G	T	T	T	A	T
T	T	T	T	T	T	T	T	T	A	C	T
T	T	A	A	T	A	T	A	A	A	T	A
G	G	T	T	G	T	G	T	T	A	A	T
G	G	T	T	G	T	G	T	T	G	C	T
A	A	G	G	A	G	A	G	G	A	T	G
G	G	T	T	G	T	G	T	T	A	T	T
A	A	C	C	A	C	A	C	C	G	G	C
A	A	C	C	A	C	A	C	C	G	T	C
G	G	A	A	G	A	G	A	A	T	G	A
G	G	G	G	G	G	G	G	G	G	G	G
T	T	C	C	T	C	T	C	C	C	T	C
T	T	A	A	T	A	T	A	A	C	T	A
C	C	T	T	C	T	C	T	T	A	A	T
C	C	G	G	C	G	C	G	G	C	C	G
G	G	T	T	G	T	G	T	T	T	T	T
A	A	C	C	A	C	A	C	C	A	T	C
A	A	A	A	A	A	A	A	A	C	A	A
G	G	C	C	G	C	G	C	C	T	C	C
G	G	A	A	G	A	G	A	A	T	C	A
T	T	A	A	T	A	T	A	A	G	C	A
C	C	T	T	C	T	C	T	T	T	C	T
T	T	T	T	T	T	T	T	T	G	A	T
T	T	C	C	T	C	T	C	C	G	A	C
A	A	A	A	A	A	A	A	A	T	A	A
A	A	G	G	A	G	A	G	G	T	A	G
T	T	A	A	T	A	T	A	A	A	T	A
G	G	A	A	G	A	G	A	A	C	G	A
A	A	A	G	A	G	A	A	G	T	C	G
C	C	T	T	C	T	C	T	T	T	T	T
A	A	A	A	A	A	A	A	A	A	G	A
A	A	G	G	A	G	A	G	G	C	T	G
C	C	G	G	C	G	C	G	G	C	T	G
C	C	A	A	C	A	C	A	A	C	G	A
T	T	C	C	T	C	T	C	C	C	T	C
T	T	C	C	T	C	T	C	C	A	T	C
C	C	T	T	C	T	C	T	T	A	A	T
T	T	G	G	T	G	T	G	G	A	A	G
T	T	A	A	T	A	T	A	A	A	A	A
G	G	G	G	G	G	G	G	G	T	A	G
A	A	C	C	A	C	A	C	C	G	T	C
A	A	A	A	A	A	A	A	A	C	T	A
A	A	T	T	A	T	A	T	T	T	T	T
T	T	A	A	T	A	T	A	A	G	A	A
A	A	G	G	A	G	A	G	G	T	T	G
C	C	T	T	C	T	C	T	T	T	T	T
T	T	C	C	T	C	T	C	C	G	G	C
C	C	T	T	C	T	C	T	T	T	T	T
C	C	T	T	C	T	C	T	T	T	C	T
A	A	G	G	A	G	A	G	G	A	C	G
A	A	C	C	A	C	A	C	C	A	A	C
A	A	C	C	A	C	A	C	C	A	G	C
A	A	G	G	A	G	A	G	G	A	C	G
A	A	A	A	A	A	A	A	A	T	A	A
G	G	A	A	G	A	G	A	A	T	T	A
A	A	T	T	A	T	A	T	T	T	G	T
G	G	A	A	G	A	G	A	A	A	T	A
A	A	C	C	A	C	A	C	C	T	C	C
A	A	C	C	A	C	A	C	C	T	A	C
A	A	A	A	A	A	A	A	A	G	C	A
G	G	T	T	G	T	G	T	T	T	A	T
T	T	A	A	T	A	T	A	A	C	A	A
C	C	A	A	C	A	C	A	A	C	T	A
A	A	T	T	A	T	A	T	T	A	T	T
A	A	G	G	A	G	A	G	G	G	C	G
C	C	A	A	C	A	C	A	A	C	A	A
A	A	A	A	A	A	A	A	A	A	G	A
T	T	T	T	T	T	T	T	T	T	A	T
C	C	C	C	C	C	C	C	C	G	A	C
A	A	T	T	A	T	A	T	T	T	G	T
A	A	G	G	A	G	A	G	G	C	T	G
T	T	G	G	T	G	T	G	G	A	A	G
A	A	C	C	A	C	A	C	C	C	G	C
T	T	T	T	T	T	T	T	T	A	G	T
T	T	T	T	T	T	T	T	T	A	A	T
G	G	G	G	G	G	G	G	G	T	C	G
T	T	A	A	T	A	T	A	A	T	C	A
T	T	A	A	T	A	T	A	A	C	T	A
G	G	A	A	G	A	G	A	A	A	G	A
G	G	A	A	G	A	G	A	A	G	A	A
T	T	C	C	T	C	T	C	C	A	G	C
G	G	C	C	G	C	G	C	C	A	C	C
A	A	A	A	A	A	A	A	A	G	A	A
C	C	T	T	C	T	C	T	T	T	T	T
T	T	T	T	T	T	T	T	T	A	A	T
T	T	C	C	T	C	T	C	C	G	G	C
T	T	T	T	T	T	T	T	T	G	T	T
A	A	T	T	A	T	A	T	T	A	C	T
A	A	C	C	A	C	A	C	C	C	T	C
A	A	G	G	A	G	A	G	G	C	T	G
C	C	T	T	C	T	C	T	T	T	G	T
T	T	A	A	T	A	T	A	A	G	C	A
T	T	A	A	T	A	T	A	A	A	C	A
A	A	G	G	A	G	A	G	G	G	G	G
A	A	G	G	A	G	A	G	G	C	A	G
T	T	G	G	T	G	T	G	G	A	A	G
G	G	T	T	G	T	G	T	T	T	T	T
A	A	G	G	A	G	A	G	G	A	A	G
A	A	G	G	A	G	A	G	G	G	C	G
G	G	T	T	G	T	G	T	T	T	C	T
A	A	C	C	A	C	A	C	C	C	A	C
G	G	G	G	G	G	G	G	G	T	T	G
A	A	C	C	A	C	A	C	C	T	A	C
T	T	A	A	T	A	T	A	A	G	A	A
C	C	C	C	C	C	C	C	C	C	T	C
G	G	T	T	G	T	G	T	T	C	G	T
C	C	A	A	C	A	C	A	A	G	A	A
C	C	T	T	C	T	C	T	T	A	A	T
A	A	T	T	A	T	A	T	T	A	T	T
T	T	G	G	T	G	T	G	G	T	C	G
T	T	C	C	T	C	T	C	C	A	T	C
A	A	C	C	A	C	A	C	C	C	G	C
T	T	T	T	T	T	T	T	T	C	G	T
T	T	T	T	T	T	T	T	T	A	C	T
T	T	T	T	T	T	T	T	T	T	T	T
T	T	G	G	T	G	T	G	G	A	T	G
G	G	G	G	G	G	G	G	G	A	G	G
G	G	A	A	G	A	G	A	A	T	A	A
C	C	G	G	C	G	C	G	G	G	A	G
A	A	G	G	A	G	A	G	G	A	A	G
T	T	C	C	T	C	T	C	C	A	A	C
C	C	T	T	C	T	C	T	T	T	C	T
T	T	G	G	T	G	T	G	G	C	C	G
T	T	T	T	T	T	T	T	T	T	A	T
T	T	G	G	T	G	T	G	G	G	T	G
T	T	T	T	T	T	T	T	T	G	T	T
T	T	G	G	T	G	T	G	G	C	C	G
C	C	T	T	C	T	C	T	T	T	T	T
T	T	T	T	T	T	T	T	T	T	T	T
G	G	C	C	G	C	G	C	C	G	C	C
C	C	T	T	C	T	C	T	T	A	G	T
T	T	C	C	T	C	T	C	C	A	T	C
T	T	T	T	T	T	T	T	T	A	A	T
C	C	T	T	C	T	C	T	T	A	A	T
C	C	A	A	C	A	C	A	A	C	G	A
A	A	T	T	A	T	A	T	T	C	G	T
C	C	G	G	C	G	C	G	G	A	G	G
A	A	T	T	A	T	A	T	T	T	T	T
A	A	T	T	A	T	A	T	T	T	G	T
G	G	G	G	G	G	G	G	G	C	G	G
T	T	G	G	T	G	T	G	G	T	T	G
G	G	T	T	G	T	G	T	T	T	C	T
C	C	T	T	C	T	C	T	T	C	G	T
T	T	G	G	T	G	T	G	G	G	C	G
T	T	C	C	T	C	T	C	C	T	A	C
T	T	C	C	T	C	T	C	C	A	C	C
T	T	A	A	T	A	T	A	A	A	T	A
G	G	T	T	G	T	G	T	T	G	A	T
T	T	A	A	T	A	T	A	A	G	T	A
G	G	A	A	G	A	G	A	A	G	T	A
G	G	C	C	G	C	G	C	C	T	G	C
A	A	A	A	A	A	A	A	A	G	C	A
A	A	A	A	A	A	A	A	A	G	C	A
A	A	G	G	A	G	A	G	G	T	T	G
C	C	T	T	C	T	C	T	T	C	T	T
T	T	G	G	T	G	T	G	G	G	T	G
G	G	T	T	G	T	G	T	T	C	G	T
T	T	G	G	T	G	T	G	G	A	G	G
G	G	C	C	G	C	G	C	C	C	A	C
A	A	C	C	A	C	A	C	C	T	G	C
A	A	T	T	A	T	A	T	T	A	G	T
A	A	A	A	A	A	A	A	A	T	C	A
G	G	T	T	G	T	G	T	T	T	T	T
G	G	T	T	G	T	G	T	T	G	G	T
T	T	G	G	T	G	T	G	G	C	T	G
T	T	G	G	T	G	T	G	G	C	G	G
T	T	G	G	T	G	T	G	G	T	T	G
G	G	T	T	G	T	G	T	T	T	G	T
G	G	T	T	G	T	G	T	T	T	T	T
A	A	C	C	A	C	A	C	C	G	T	C
T	T	C	C	T	C	T	C	C	G	C	C
T	T	A	A	T	A	T	A	A	A	T	A
A	A	C	C	A	C	A	C	C	G	C	C
T	T	G	G	T	G	T	G	G	G	T	G
A	A	T	T	A	T	A	T	T	C	T	T
A	A	G	G	A	G	A	G	G	T	A	G
A	A	C	C	A	C	A	C	C	G	T	C
G	G	T	T	G	T	G	T	T	T	G	T
C	C	A	A	C	A	C	A	A	G	T	A
A	A	G	G	A	G	A	G	G	T	T	G
T	T	C	C	T	C	T	C	C	G	G	C
T	T	G	G	T	G	T	G	G	T	G	G
C	C	C	C	C	C	C	C	C	T	T	C
A	A	T	T	A	T	A	T	T	C	T	T
A	A	A	A	A	A	A	A	A	T	G	A
A	A	A	A	A	A	A	A	A	C	C	A
C	C	C	C	C	C	C	C	C	T	C	C
A	A	A	A	A	A	A	A	A	T	A	A
A	A	T	T	A	T	A	T	T	A	T	T
A	A	A	A	A	A	A	A	A	T	A	A
T	T	G	G	T	G	T	G	G	G	A	G
T	T	G	G	T	G	T	G	G	T	C	G
G	G	T	T	G	T	G	T	T	T	A	T
T	T	T	T	T	T	T	T	T	G	A	T
T	T	G	G	T	G	T	G	G	G	G	G
G	G	T	T	G	T	G	T	T	T	T	T
A	A	A	A	A	A	A	A	A	T	G	A
A	A	A	A	A	A	A	A	A	G	T	A
T	T	C	C	T	C	T	C	C	C	G	C
C	C	C	C	C	C	C	C	C	C	C	C
C	C	A	A	C	A	C	A	A	A	C	A
T	T	T	T	T	T	T	T	T	T	T	T
G	G	A	A	G	A	G	A	A	A	A	A
T	T	C	C	T	C	T	C	C	A	T	C
G	G	A	A	G	A	G	A	A	C	T	A
G	G	G	G	G	G	G	G	G	A	G	G
T	T	G	G	T	G	T	G	G	A	G	G
A	A	T	T	A	T	A	T	T	G	G	T
A	A	G	G	A	G	A	G	G	T	T	G
T	T	T	T	T	T	T	T	T	G	T	T
T	T	T	T	T	T	T	T	T	T	C	T
T	T	G	G	T	G	T	G	G	G	C	G
T	T	T	T	T	T	T	T	T	C	A	T
A	A	T	T	A	T	A	T	T	C	C	T
A	A	G	G	A	G	A	G	G	T	G	G
A	A	G	G	A	G	A	G	G	A	T	G
G	G	A	A	G	A	G	A	A	T	G	A
T	T	G	G	T	G	T	G	G	T	C	G
T	T	A	A	T	A	T	A	A	G	T	A
A	A	A	A	A	A	A	A	A	G	A	A
C	C	G	G	C	G	C	G	G	G	G	G
A	A	G	G	A	G	A	G	G	T	C	G
A	A	T	T	A	T	A	T	T	T	G	T
A	A	T	T	A	T	A	T	T	C	C	T
A	A	C	C	A	C	A	C	C	C	T	C
G	G	C	C	G	C	G	C	C	A	A	C
G	G	G	G	G	G	G	G	G	C	A	G
A	A	A	A	A	A	A	A	A	G	C	A
A	A	A	A	A	A	A	A	A	T	A	A
A	A	G	G	A	G	A	G	G	G	T	G
A	A	G	G	A	G	A	G	G	C	A	G
G	G	T	T	G	T	G	T	T	T	G	T
C	C	C	C	C	C	C	C	C	A	G	C
T	T	T	T	T	T	T	T	T	G	T	T
A	A	T	T	A	T	A	T	T	C	T	T
A	A	A	A	A	A	A	A	A	G	G	A
A	A	A	A	A	A	A	A	A	C	T	A
A	A	T	T	A	T	A	T	T	T	A	T
A	A	G	G	A	G	A	G	G	A	A	G
A	A	A	A	A	A	A	A	A	A	C	A
G	G	C	C	G	C	G	C	C	C	C	C
G	G	A	A	G	A	G	A	A	A	A	A
T	T	A	A	T	A	T	A	A	T	T	A
G	G	C	C	G	C	G	C	C	A	A	C
C	C	C	C	C	C	C	C	C	G	C	C
C	C	T	T	C	T	C	T	T	G	A	T
T	T	T	T	T	T	T	T	T	T	G	T
G	G	C	C	G	C	G	C	C	T	G	C
G	G	T	T	G	T	G	T	T	G	T	T
A	A	T	T	A	T	A	T	T	T	G	T
A	A	G	G	A	G	A	G	G	A	T	G
T	T	A	A	T	A	T	A	A	A	T	A
A	A	A	A	A	A	A	A	A	C	G	A
T	T	A	A	T	A	T	A	A	C	T	A
T	T	T	T	T	T	T	T	T	A	T	T
G	G	A	A	G	A	G	A	A	T	G	A
G	G	C	C	G	C	G	C	C	A	G	C
T	T	T	T	T	T	T	T	T	C	A	T
G	G	C	C	G	C	G	C	C	A	G	C
A	A	C	C	A	C	A	C	C	G	A	C
A	A	A	A	A	A	A	A	A	G	A	A
C	C	A	A	C	A	C	A	A	T	G	A
A	A	A	A	A	A	A	A	A	G	G	A
G	G	A	A	G	A	G	A	A	T	T	A
A	A	A	A	A	A	A	A	A	T	T	A
A	A	G	G	A	G	A	G	G	G	C	G
A	A	A	A	A	A	A	A	A	T	C	A
T	T	G	G	T	G	T	G	G	T	G	G
C	C	A	A	C	A	C	A	A	G	A	A
A	A	A	A	A	A	A	A	A	G	A	A
A	A	A	A	A	A	A	A	A	A	G	A
T	T	G	G	T	G	T	G	G	G	G	G
A	A	T	T	A	T	A	T	T	A	T	T
C	C	C	C	C	C	C	C	C	A	C	C
T	T	A	A	T	A	T	A	A	G	T	A
G	G	A	A	G	A	G	A	A	G	T	A
A	A	C	C	A	C	A	C	C	T	A	C
G	G	A	A	G	A	G	A	A	T	A	A
T	T	T	T	T	T	T	T	T	C	T	T
C	C	C	C	C	C	C	C	C	C	G	C
C	C	A	A	C	A	C	A	A	G	A	A
T	T	A	A	T	A	T	A	A	A	C	A
C	C	T	T	C	T	C	T	T	A	A	T
T	T	A	A	T	A	T	A	A	G	A	A
T	T	T	T	T	T	T	T	T	G	C	T
T	T	T	T	T	T	T	T	T	T	C	T
A	A	G	G	A	G	A	G	G	C	T	G
T	T	T	T	T	T	T	T	T	T	T	T
G	G	T	T	G	T	G	T	T	T	C	T
C	C	G	G	C	G	C	G	G	A	T	G
A	A	G	G	A	G	A	G	G	A	T	G
T	T	T	T	T	T	T	T	T	T	G	T
T	T	G	G	T	G	T	G	G	G	A	G
T	T	A	A	T	A	T	A	A	A	A	A
G	G	C	C	G	C	G	C	C	C	A	C
C	C	T	T	C	T	C	T	T	A	T	T
A	A	T	T	A	T	A	T	T	A	A	T
T	T	T	T	T	T	T	T	T	C	C	T
C	C	A	A	C	A	C	A	A	C	T	A
A	A	A	A	A	A	A	A	A	T	C	A
G	G	A	A	G	A	G	A	A	T	C	A
A	A	C	C	A	C	A	C	C	C	A	C
G	G	T	T	G	T	G	T	T	T	A	T
G	G	T	T	G	T	G	T	T	T	A	T
C	C	A	A	C	A	C	A	A	G	A	A
T	T	A	A	T	A	T	A	A	A	A	A
G	G	T	T	G	T	G	T	T	A	G	T
C	C	G	G	C	G	C	G	G	A	A	G
T	T	A	A	T	A	T	A	A	T	G	A
C	C	A	A	C	A	C	A	A	A	A	A
G	G	G	G	G	G	G	G	G	C	A	G
T	T	A	A	T	A	T	A	A	T	A	A
G	G	G	G	G	G	G	G	G	C	G	G
T	T	A	A	T	A	T	A	A	C	T	A
T	T	T	T	T	T	T	T	T	A	C	T
G	G	C	C	G	C	G	C	C	A	A	C
T	T	G	G	T	G	T	G	G	A	A	G
A	A	C	C	A	C	A	C	C	A	C	C
C	C	C	C	C	C	C	C	C	A	A	C
G	G	A	A	G	A	G	A	A	G	T	A
A	A	T	T	A	T	A	T	T	A	C	T
T	T	T	T	T	T	T	T	T	G	A	T
C	C	A	A	C	A	C	A	A	A	A	A
A	A	T	T	A	T	A	T	T	A	T	T
A	A	T	T	A	T	A	T	T	A	A	T
T	T	T	T	T	T	T	T	T	G	T	T
T	T	T	T	T	T	T	T	T	T	T	T
T	T	G	G	T	G	T	G	G	C	G	G
T	T	G	G	T	G	T	G	G	A	T	G
C	C	C	C	C	C	C	C	C	A	T	C
T	T	A	A	T	A	T	A	A	C	G	A
C	C	T	T	C	T	C	T	T	A	G	T
C	C	C	C	C	C	C	C	C	T	T	C
C	C	T	T	C	T	C	T	T	C	G	T
G	G	T	T	G	T	G	T	T	A	A	T
C	C	T	T	C	T	C	T	T	A	C	T
A	A	T	T	A	T	A	T	T	T	T	T
C	C	T	T	C	T	C	T	T	A	T	T
T	T	C	C	T	C	T	C	C	T	T	C
C	C	T	T	C	T	C	T	T	T	A	T
T	T	G	G	T	G	T	G	G	G	A	G
T	T	C	C	T	C	T	C	C	T	A	C
G	G	T	T	G	T	G	T	T	T	C	T
A	A	T	T	A	T	A	T	T	G	T	T
A	A	C	C	A	C	A	C	C	G	T	C
A	A	C	C	A	C	A	C	C	T	A	C
C	C	A	A	C	A	C	A	A	G	A	A
T	T	C	C	T	C	T	C	C	A	T	C
G	G	A	A	G	A	G	A	A	C	G	A
C	C	A	A	C	A	C	A	A	T	A	A
T	T	G	G	T	G	T	G	G	T	A	G
C	C	T	T	C	T	C	T	T	T	G	T
A	A	G	G	A	G	A	G	G	A	A	G
A	A	C	C	A	C	A	C	C	A	G	C
A	A	T	T	A	T	A	T	T	A	A	T
A	A	T	T	A	T	A	T	T	C	T	T
T	T	T	T	T	T	T	T	T	T	C	T
T	T	T	T	T	T	T	T	T	T	G	T
C	C	G	G	C	G	C	G	G	A	C	G
T	T	T	T	T	T	T	T	T	A	C	T
G	G	G	G	G	G	G	G	G	T	A	G
T	T	G	G	T	G	T	G	G	G	T	G
G	G	A	A	G	A	G	A	A	A	T	A
C	C	A	A	C	A	C	A	A	A	A	A
G	G	A	A	G	A	G	A	A	G	T	A
T	T	C	C	T	C	T	C	C	A	T	C
G	G	T	T	G	T	G	T	T	G	T	T
T	T	G	G	T	G	T	G	G	A	T	G
T	T	T	T	T	T	T	T	T	T	G	T
T	T	G	G	T	G	T	G	G	C	G	G
T	T	A	A	T	A	T	A	A	G	C	A
A	A	A	A	A	A	A	A	A	C	A	A
C	C	A	A	C	A	C	A	A	C	T	A
A	A	G	G	A	G	A	G	G	A	C	G
G	G	G	G	G	G	G	G	G	T	T	G
A	A	T	T	A	T	A	T	T	T	T	T
A	A	T	T	A	T	A	T	T	A	T	T
G	G	T	T	G	T	G	T	T	T	T	T
G	G	G	G	G	G	G	G	G	T	T	G
C	C	G	G	C	G	C	G	G	T	C	G
C	C	A	A	C	A	C	A	A	T	T	A
G	G	T	T	G	T	G	T	T	G	G	T
C	C	T	T	C	T	C	T	T	G	C	T
T	T	A	A	T	A	T	A	A	C	T	A
A	A	T	T	A	T	A	T	T	A	T	T
T	T	A	A	T	A	T	A	A	T	C	A
A	A	A	A	A	A	A	A	A	C	C	A
A	A	A	A	A	A	A	A	A	T	A	A
C	C	G	G	C	G	C	G	G	T	C	G
A	A	C	C	A	C	A	C	C	T	A	C
A	A	A	A	A	A	A	A	A	T	A	A
T	T	T	T	T	T	T	T	T	T	G	T
A	A	T	T	A	T	A	T	T	C	T	T
C	C	C	C	C	C	C	C	C	T	G	C
T	T	A	A	T	A	T	A	A	G	C	A
A	A	A	A	A	A	A	A	A	C	T	A
G	G	A	A	G	A	G	A	A	T	T	A
A	A	C	C	A	C	A	C	C	T	T	C
T	T	A	A	T	A	T	A	A	C	T	A
G	G	A	A	G	A	G	A	A	C	G	A
G	G	A	A	G	A	G	A	A	A	T	A
A	A	T	T	A	T	A	T	T	C	G	T
A	A	T	T	A	T	A	T	T	A	G	T
T	T	G	G	T	G	T	G	G	A	A	G
T	T	T	T	T	T	T	T	T	G	A	T
T	T	T	T	T	T	T	T	T	T	A	T
C	C	G	G	C	G	C	G	G	G	C	G
A	A	A	A	A	A	A	A	A	C	T	A
C	C	A	A	C	A	C	A	A	T	G	A
A	A	T	T	A	T	A	T	T	T	T	T
G	G	C	C	G	C	G	C	C	T	G	C
T	T	C	C	T	C	T	C	C	T	A	C
A	A	T	T	A	T	A	T	T	G	A	T
T	T	G	G	T	G	T	G	G	T	A	G
T	T	T	T	T	T	T	T	T	G	G	T
C	C	G	G	C	G	C	G	G	G	G	G
A	A	G	G	A	G	A	G	G	A	T	G
C	C	T	T	C	T	C	T	T	A	T	T
T	T	A	A	T	A	T	A	A	A	T	A
G	G	A	A	G	A	G	A	A	C	G	A
A	A	T	T	A	T	A	T	T	T	G	T
G	G	T	T	G	T	G	T	T	G	A	T
A	A	T	T	A	T	A	T	T	T	T	T
C	C	T	T	C	T	C	T	T	G	T	T
T	T	A	A	T	A	T	A	A	A	A	A
C	C	A	A	C	A	C	A	A	A	T	A
A	A	A	A	A	A	A	A	A	A	A	A
T	T	G	G	T	G	T	G	G	G	A	G
T	T	T	T	T	T	T	T	T	G	A	T
G	G	T	T	G	T	G	T	T	T	G	T
A	A	A	A	A	A	A	A	A	T	C	A
T	T	C	C	T	C	T	C	C	T	A	C
G	G	A	A	G	A	G	A	A	G	T	A
C	C	A	A	C	A	C	A	A	G	T	A
T	T	A	A	T	A	T	A	A	A	C	A
A	A	A	A	A	A	A	A	A	T	A	A
T	T	G	G	T	G	T	G	G	T	A	G
G	G	G	G	G	G	G	G	G	A	A	G
A	A	A	A	A	A	A	A	A	T	C	A
T	T	A	A	T	A	T	A	A	A	A	A
G	G	A	A	G	A	G	A	A	A	A	A
T	T	A	A	T	A	T	A	A	A	A	A
T	T	G	G	T	G	T	G	G	G	T	G
C	C	C	C	C	C	C	C	C	C	T	C
A	A	T	T	A	T	A	T	T	A	G	T
C	C	A	A	C	A	C	A	A	T	T	A
A	A	A	A	A	A	A	A	A	T	T	A
T	T	A	A	T	A	T	A	A	C	G	A
C	C	A	A	C	A	C	A	A	A	A	A
T	T	A	A	T	A	T	A	A	A	A	A
G	G	A	A	G	A	G	A	A	A	T	A
A	A	G	G	A	G	A	G	G	C	C	G
T	T	G	G	T	G	T	G	G	A	C	G
T	T	T	T	T	T	T	T	T	A	T	T
T	T	G	G	T	G	T	G	G	A	G	G
G	G	C	C	G	C	G	C	C	T	T	C
G	G	C	C	G	C	G	C	C	T	G	C
C	C	T	T	C	T	C	T	T	G	G	T
T	T	G	G	T	G	T	G	G	T	T	G
A	A	G	G	A	G	A	G	G	T	A	G
C	C	A	A	C	A	C	A	A	G	A	A
T	T	A	A	T	A	T	A	A	A	T	A
A	A	T	T	A	T	A	T	T	A	T	T
A	A	A	A	A	A	A	A	A	T	T	A
C	C	T	T	C	T	C	T	T	C	T	T
A	A	T	T	A	T	A	T	T	C	A	T
A	A	G	G	A	G	A	G	G	T	A	G
T	T	G	G	T	G	T	G	G	G	A	G
C	C	T	T	C	T	C	T	T	T	G	T
T	T	G	G	T	G	T	G	G	G	T	G
A	A	A	A	A	A	A	A	A	G	T	A
G	G	A	A	G	A	G	A	A	T	A	A
T	T	C	C	T	C	T	C	C	A	C	C
T	T	A	A	T	A	T	A	A	A	A	A
G	G	G	G	G	G	G	G	G	T	A	G
T	T	A	A	T	A	T	A	A	T	A	A
A	A	A	A	A	A	A	A	A	T	A	A
A	A	A	A	A	A	A	A	A	T	G	A
T	T	T	T	T	T	T	T	T	A	G	T
G	G	C	C	G	C	G	C	C	A	A	C
G	G	A	A	G	A	G	A	A	A	A	A
C	C	A	A	C	A	C	A	A	G	A	A
C	C	T	T	C	T	C	T	T	T	A	T
T	T	A	A	T	A	T	A	A	T	G	A
A	A	C	C	A	C	A	C	C	A	C	C
C	C	T	T	C	T	C	T	T	C	T	T
A	A	G	G	A	G	A	G	G	A	A	G
T	T	A	A	T	A	T	A	A	A	A	A
T	T	G	G	T	G	T	G	G	A	A	G
A	A	T	T	A	T	A	T	T	A	A	T
C	C	C	C	C	C	C	C	C	G	A	C
A	A	C	C	A	C	A	C	C	G	A	C
G	G	T	T	G	T	G	T	T	A	G	T
G	G	C	C	G	C	G	C	C	A	G	C
T	T	T	T	T	T	T	T	T	A	T	T
G	G	T	T	G	T	G	T	T	A	G	T
G	G	T	T	G	T	G	T	T	G	C	T
T	T	A	A	T	A	T	A	A	C	C	A
G	G	T	T	G	T	G	T	T	T	T	T
T	T	G	G	T	G	T	G	G	A	G	G
T	T	C	C	T	C	T	C	C	A	G	C
G	G	A	A	G	A	G	A	A	A	A	A
T	T	T	T	T	T	T	T	T	A	A	T
T	T	T	T	T	T	T	T	T	A	T	T
C	C	T	T	C	T	C	T	T	A	A	T
A	A	G	G	A	G	A	G	G	G	T	G
G	G	C	C	G	C	G	C	C	G	T	C
T	T	A	A	T	A	T	A	A	T	G	A
T	T	T	T	T	T	T	T	T	G	G	T
G	G	C	C	G	C	G	C	C	C	T	C
A	A	A	A	A	A	A	A	A	C	G	A
C	C	G	G	C	G	C	G	G	T	A	G
T	T	A	A	T	A	T	A	A	G	A	A
T	T	G	G	T	G	T	G	G	G	C	G
C	C	G	G	C	G	C	G	G	A	A	G
G	G	C	C	G	C	G	C	C	A	G	C
C	C	T	T	C	T	C	T	T	T	A	T
A	A	G	G	A	G	A	G	G	A	A	G
G	G	C	C	G	C	G	C	C	T	A	C
T	T	T	T	T	T	T	T	T	T	T	T
G	G	C	C	G	C	G	C	C	G	C	C
G	G	G	G	G	G	G	G	G	G	A	G
C	C	T	T	C	T	C	T	T	T	A	T
T	T	G	G	T	G	T	G	G	G	T	G
A	A	T	T	A	T	A	T	T	A	A	T
A	A	T	T	A	T	A	T	T	A	C	T
C	C	G	G	C	G	C	G	G	C	T	G
T	T	T	T	T	T	T	T	T	A	G	T
A	A	A	A	A	A	A	A	A	G	A	A
A	A	C	C	A	C	A	C	C	A	G	C
C	C	G	G	C	G	C	G	G	A	T	G
A	A	A	A	A	A	A	A	A	A	C	A
T	T	T	T	T	T	T	T	T	T	C	T
T	C	C	C	C	C	C	C	C	C	T	C
T	T	A	A	T	A	T	A	A	A	C	A
T	T	A	A	T	A	T	A	A	A	T	A
T	T	T	T	T	T	T	T	T	T	T	T
G	G	T	T	G	T	G	T	T	A	T	T
G	G	T	T	G	T	G	T	T	C	A	T
C	C	T	T	C	T	C	T	T	T	T	T
A	A	C	C	A	C	A	C	C	G	G	C
C	C	T	T	C	T	C	T	T	A	C	T
T	T	C	C	T	C	T	C	C	G	A	C
G	G	C	C	G	C	G	C	C	T	T	C
T	T	C	C	T	C	T	C	C	C	T	C
T	T	G	G	T	G	T	G	G	C	T	G
T	T	C	C	T	C	T	C	C	T	G	C
A	A	A	A	A	A	A	A	A	C	C	A
T	T	C	C	T	C	T	C	C	T	A	C
G	G	T	T	G	T	G	T	T	T	T	T
A	A	C	C	A	C	A	C	C	T	C	C
A	A	T	T	A	T	A	T	T	A	A	T
A	A	T	T	A	T	A	T	T	T	G	T
A	A	G	G	A	G	A	G	G	G	A	G
A	A	A	A	A	A	A	A	A	C	G	A
C	C	A	A	C	A	C	A	A	A	G	A
T	T	A	A	T	A	T	A	A	T	C	A
C	C	C	C	C	C	C	C	C	T	T	C
A	A	T	T	A	T	A	T	T	T	G	T
A	A	G	G	A	G	A	G	G	G	C	G
A	A	C	C	A	C	A	C	C	C	T	C
C	C	T	T	C	T	C	T	T	A	C	T
C	C	C	C	C	C	C	C	C	T	G	C
C	C	A	A	C	A	C	A	A	C	T	A
G	G	A	A	G	A	G	A	A	A	G	A
T	T	A	A	T	A	T	A	A	G	T	A
C	C	A	A	C	A	C	A	A	A	T	A
C	C	T	T	C	T	C	T	T	G	G	T
T	T	T	T	T	T	T	T	T	G	T	T
T	T	C	C	T	C	T	C	C	C	A	C
G	G	T	T	G	T	G	T	T	T	C	T
A	A	G	G	A	G	A	G	G	G	G	G
T	T	T	T	T	T	T	T	T	C	A	T
T	T	G	G	T	G	T	G	G	T	T	G
G	G	C	C	G	C	G	C	C	C	C	C
G	G	G	G	G	G	G	G	G	G	A	G
C	C	T	T	C	T	C	T	T	T	A	T
T	T	G	G	T	G	T	G	G	G	T	G
T	T	T	T	T	T	T	T	T	T	T	T
G	G	T	T	G	T	G	T	T	T	T	T
A	A	T	T	A	T	A	T	T	G	T	T
A	A	T	T	A	T	A	T	T	T	C	T
G	G	A	A	G	A	G	A	A	A	T	A
A	A	C	C	A	C	A	C	C	C	C	C
G	G	A	A	G	A	G	A	A	G	C	A
A	A	G	G	A	G	A	G	G	A	C	G
A	A	A	A	A	A	A	A	A	T	G	A
G	G	A	A	G	A	G	A	A	C	C	A
T	T	G	G	T	G	T	G	G	A	A	G
T	T	G	G	T	G	T	G	G	A	C	G
T	T	C	C	T	C	T	C	C	T	T	C
A	A	C	C	A	C	A	C	C	T	C	C
A	A	G	G	A	G	A	G	G	T	T	G
G	G	C	C	G	C	G	C	C	T	T	C
G	G	T	T	G	T	G	T	T	C	G	T
A	A	A	A	A	A	A	A	A	T	A	A
A	A	T	T	A	T	A	T	T	C	A	T
G	G	A	A	G	A	G	A	A	C	A	A
G	G	A	A	G	A	G	A	A	C	C	A
T	T	C	C	T	C	T	C	C	G	T	C
G	G	A	A	G	A	G	A	A	C	G	A
T	T	A	A	T	A	T	A	A	A	C	A
A	A	T	T	A	T	A	T	T	C	T	T
G	G	A	A	G	A	G	A	A	T	C	A
A	A	C	C	A	C	A	C	C	C	A	C
G	G	T	T	G	T	G	T	T	T	A	T
T	T	A	A	T	A	T	A	A	T	A	A
T	T	G	G	T	G	T	G	G	G	A	G
T	T	A	A	T	A	T	A	A	A	T	A
C	C	T	T	C	T	C	T	T	A	T	T
T	T	G	G	T	G	T	G	G	A	C	G
T	T	G	G	T	G	T	G	G	C	T	G
A	A	A	A	A	A	A	A	A	T	G	A
G	G	A	A	G	A	G	A	A	G	T	A
A	A	T	T	A	T	A	T	T	C	G	T
G	G	T	T	G	T	G	T	T	T	C	T
A	A	T	T	A	T	A	T	T	C	G	T
C	C	C	C	C	C	C	C	C	A	T	C
G	G	A	A	G	A	G	A	A	A	G	A
G	G	C	C	G	C	G	C	C	A	T	C
T	T	A	A	T	A	T	A	A	A	T	A
T	T	G	G	T	G	T	G	G	T	T	G
G	G	T	T	G	T	G	T	T	T	T	T
G	G	A	A	G	A	G	A	A	C	A	A
G	G	T	T	G	T	G	T	T	T	C	T
A	A	T	T	A	T	A	T	T	G	A	T
A	A	C	C	A	C	A	C	C	T	G	C
A	A	A	A	A	A	A	A	A	G	A	A
T	T	C	C	T	C	T	C	C	C	A	C
T	T	T	T	T	T	T	T	T	G	G	T
G	G	G	G	G	G	G	G	G	T	G	G
T	T	A	A	T	A	T	A	A	G	C	A
T	T	G	G	T	G	T	G	G	T	C	G
A	A	A	A	A	A	A	A	A	T	G	A
A	A	C	C	A	C	A	C	C	T	C	C
A	A	T	T	A	T	A	T	T	T	T	T
T	T	C	C	T	C	T	C	C	A	A	C
T	T	A	A	T	A	T	A	A	C	T	A
T	T	T	T	T	T	T	T	T	A	A	T
A	A	T	T	A	T	A	T	T	G	A	T
T	T	G	G	T	G	T	G	G	A	C	G
C	C	A	A	C	A	C	A	A	A	A	A
T	T	T	T	T	T	T	T	T	G	A	T
C	C	G	G	C	G	C	G	G	G	T	G
A	A	C	C	A	C	A	C	C	C	A	C
A	A	T	T	A	T	A	T	T	C	C	T
C	C	A	A	C	A	C	A	A	G	T	A
C	C	T	T	C	T	C	T	T	C	A	T
T	T	G	G	T	G	T	G	G	T	G	G
G	G	A	A	G	A	G	A	A	A	A	A
T	T	T	T	T	T	T	T	T	T	T	T
G	G	G	G	G	G	G	G	G	A	G	G
C	C	T	T	C	T	C	T	T	A	G	T
T	T	T	T	T	T	T	T	T	C	A	T
T	T	C	C	T	C	T	C	C	A	A	C
G	G	A	A	G	A	G	A	A	A	T	A
T	T	C	C	T	C	T	C	C	T	T	C
G	G	A	A	G	A	G	A	A	A	T	A
A	A	T	T	A	T	A	T	T	C	C	T
A	A	C	C	A	C	A	C	C	T	A	C
A	A	T	T	A	T	A	T	T	A	C	T
T	T	G	G	T	G	T	G	G	G	A	G
T	T	A	A	T	A	T	A	A	A	G	A
G	G	T	T	G	T	G	T	T	T	T	T
T	T	T	T	T	T	T	T	T	G	A	T
C	C	T	T	C	T	C	T	T	G	T	T
G	G	G	G	G	G	G	G	G	A	T	G
G	G	G	G	G	G	G	G	G	A	C	G
T	T	C	C	T	C	T	C	C	T	A	C
G	G	T	T	G	T	G	T	T	T	C	T
G	G	A	A	G	A	G	A	A	T	T	A
A	A	C	C	A	C	A	C	C	C	G	C
C	C	T	T	C	T	C	T	T	A	A	T
A	A	A	A	A	A	A	A	A	C	G	A
A	A	A	A	A	A	A	A	A	A	A	A
A	A	C	C	A	C	A	C	C	G	C	C
T	T	A	A	T	A	T	A	A	T	T	A
T	T	A	A	T	A	T	A	A	A	C	A
G	G	T	T	G	T	G	T	T	T	A	T
T	T	C	C	T	C	T	C	C	T	T	C
C	C	T	T	C	T	C	T	T	C	T	T
A	A	A	A	A	A	A	A	A	A	G	A
C	C	G	G	C	G	C	G	G	C	A	G
C	C	T	T	C	T	C	T	T	T	T	T
[truncated: 27,905 more rows]

## Sheet: Di_Nucl_Trans_Female
	Reference	AUS_1	AUS_2	AUS_3	AUS_4	AUS_5	NZL_1
AA	2880	2839	2840	2813	2812	2814	2840
CC	888	881	882	870	869	869	881
GG	1093	1089	1090	1072	1073	1072	1088
TT	3215	3204	3207	3179	3178	3183	3204
AC	2023	2017	2016	1994	1994	1993	2016
AG	1742	1737	1736	1710	1710	1709	1736
AT	2307	2301	2303	2278	2277	2280	2301
CG	439	438	436	419	420	418	437
CT	2081	2075	2076	2049	2049	2049	2075
GT	1990	1986	1983	1955	1956	1953	1983
TG	2589	2585	2584	2558	2557	2558	2583
TC	1413	1408	1408	1384	1385	1383	1407
TA	2377	2369	2370	2340	2341	2341	2369
GC	1168	1167	1166	1146	1145	1146	1166
GA	1612	1607	1607	1585	1585	1585	1608
CA	2084	2078	2077	2056	2055	2055	2078

## Sheet: Di_Nucl_Trans_Male
	Reference	AUS_1	AUS_2	AUS_3	AUS_4	AUS_5	AUS_6	AUS_7	AUS_8	AUS_9	GUM_1	GUM_2	NZL_1
AA	2880	2814	2814	2841	2839	2813	2839	2812	2840	2837	2882	2880	2791
CC	888	868	869	882	881	870	880	869	882	879	885	886	861
GG	1093	1073	1072	1090	1090	1073	1090	1073	1089	1088	1093	1092	1065
TT	3215	3182	3183	3204	3204	3181	3202	3179	3204	3205	3218	3216	3144
AC	2023	1995	1993	2018	2017	1993	2017	1994	2017	2013	2020	2021	1976
AG	1742	1708	1709	1735	1737	1709	1737	1710	1737	1733	1742	1741	1696
AT	2307	2279	2280	2302	2301	2280	2301	2278	2301	2299	2310	2307	2266
CG	439	420	418	437	437	419	438	420	436	434	439	439	436
CT	2081	2047	2049	2076	2074	2049	2075	2049	2076	2074	2081	2081	2035
GT	1990	1954	1953	1984	1987	1953	1987	1956	1985	1982	1990	1989	1943
TG	2589	2557	2558	2584	2586	2557	2585	2557	2585	2581	2588	2587	2537
TC	1413	1383	1383	1409	1408	1384	1410	1385	1409	1407	1415	1414	1386
TA	2377	2341	2341	2369	2368	2341	2368	2341	2368	2367	2378	2376	2322
GC	1168	1145	1146	1165	1166	1146	1166	1145	1166	1164	1167	1167	1149
GA	1612	1585	1585	1607	1607	1585	1607	1585	1607	1602	1612	1611	1577
CA	2084	2055	2055	2078	2079	2055	2079	2055	2079	2075	2082	2082	2038

## Sheet: Mutation_Female
	AUS_1	AUS_2	AUS_3	AUS_4	AUS_5	NZL_1
AC	1654	1653	1572	1572	1572	1653
AG	1736	1735	1743	1744	1743	1734
AT	2820	2822	2810	2810	2810	2821
CG	1188	1189	1057	1057	1056	1189
CT	1692	1691	1720	1720	1724	1691
GT	2043	2044	1717	1717	1717	2042
TG	1857	1855	1695	1695	1695	1855
TC	1826	1826	1733	1732	1733	1826
TA	2870	2871	2827	2827	2827	2871
GC	1009	1009	1071	1071	1071	1009
GA	1726	1726	1717	1717	1718	1727
CA	1614	1614	1599	1599	1599	1614

## Sheet: Mutation_Male
	AUS_1	AUS_2	AUS_3	AUS_4	AUS_5	AUS_6	AUS_7	AUS_8	AUS_9	GUM_1	GUM_2	NZL_1
AC	1571	1572	1654	1653	1572	1654	1572	1654	1650	2082	1691	1627
AG	1742	1743	1735	1736	1743	1736	1744	1735	1736	1612	1729	1697
AT	2811	2810	2821	2821	2810	2820	2810	2821	2816	2378	2762	2772
CG	1057	1056	1189	1189	1056	1189	1057	1188	1185	1168	1096	1172
CT	1721	1724	1691	1691	1722	1691	1720	1691	1688	1414	1793	1659
GT	1717	1717	2043	2043	1717	2043	1717	2043	2039	2589	1628	2003
TG	1695	1695	1855	1857	1695	1857	1695	1855	1852	1989	1713	1818
TC	1732	1733	1827	1826	1733	1826	1732	1827	1825	2079	1697	1785
TA	2827	2827	2871	2870	2827	2870	2827	2871	2863	2308	2774	2818
GC	1071	1071	1009	1009	1071	1009	1071	1009	1005	439	1082	992
GA	1717	1718	1727	1726	1717	1726	1717	1725	1724	1742	1832	1694
CA	1599	1599	1614	1614	1599	1614	1599	1615	1616	2023	1585	1589
