# Supplementary material for: A hybrid computational framework for intelligent inter-continent SARS-CoV-2 sub-strains characterization and prediction
Source: Sci Rep. 2021 Jul 15;11:14558. doi: 10.1038/s41598-021-93757-w (PMC8282786; doi:10.1038/s41598-021-93757-w)
Supplement: Supplementary file 9 — Supplementary Information 9. [file 41598_2021_93757_MOESM9_ESM.xlsx]

## Sheet: Africa
Isolate/Country Code	Country	Accession no.	Gender	Age	Status	Specimen Source	Additional Information
DZA_1	Algeria	EPI_ISL_420037	male	41	live	unknown
DZA_2	Algeria	EPI_ISL_418242	male	87	live	unknown
DZA_3	Algeria	EPI_ISL_418241	female	28	live	unknown
CMR_1	Cameroon	EPI_ISL_512873	male	58	live	Pharyngeal swab
DRC1	DRC	EPI_ISL_437194	male	51	live	unknown
DRC2	DRC	EPI_ISL_437342	female	47	live	unknown
DRC3	DRC	EPI_ISL_414647	male	52	quarantine	Pharyngeal swab
DRC4	DRC	EPI_ISL_437339	male	48	live	unknown
DRC5	DRC	EPI_ISL_436412	female	66	live	unknown
DRC6	DRC	EPI_ISL_437344	female	74	live	unknown
DRC7	DRC	EPI_ISL_437345	male	51	live	unknown
DRC8	DRC	EPI_ISL_437193	female	18	live	unknown
EGY_1	Egypt	EPI_ISL_482762	male	60	live	unknown	Obur hospital
EGY_10	Egypt	EPI_ISL_529032	female	40	released	Pharyngeal swab	Healthcare worker: Hospital worker at Cairo University (Abol-Reesh) Pediatric Hospital (CUSPH) Mounira, Cairo
EGY_11	Egypt	EPI_ISL_482761	male	50	live	unknown	Obur hospital
EGY_12	Egypt	EPI_ISL_483035	male	47	live	unknown	Obur hospital
EGY_13	Egypt	EPI_ISL_475753	female	70	live	unknown
EGY_14	Egypt	EPI_ISL_482766	male	39	live	unknown	Giza
EGY_15	Egypt	EPI_ISL_475745	female	63	live	unknown
EGY_16	Egypt	EPI_ISL_475749	female	35	live	unknown
EGY_17	Egypt	EPI_ISL_482770	male	31	live	unknown
EGY_18	Egypt	EPI_ISL_475752	male	34	live	unknown
EGY_19	Egypt	EPI_ISL_483038	male	39	live	unknown
EGY_2	Egypt	EPI_ISL_430819	female	35	live	Pharyngeal swab
EGY_20	Egypt	EPI_ISL_482767	male	51	live	unknown	Giza
EGY_21	Egypt	EPI_ISL_482771	female	39	live	unknown
EGY_22	Egypt	EPI_ISL_475748	male	72	live	unknown
EGY_23	Egypt	EPI_ISL_483037	male	35	live	unknown
EGY_24	Egypt	EPI_ISL_482768	female	50	live	unknown	Menofia
EGY_25	Egypt	EPI_ISL_475751	male	50	live	unknown
EGY_26	Egypt	EPI_ISL_482764	female	32	live	unknown
EGY_27	Egypt	EPI_ISL_475747	male	54	live	unknown
EGY_28	Egypt	EPI_ISL_482772	male	31	live	unknown
EGY_29	Egypt	EPI_ISL_475750	male	37	live	unknown
EGY_3	Egypt	EPI_ISL_482774	female	35	live	unknown
EGY_30	Egypt	EPI_ISL_482769	male	39	live	unknown	Salam city
EGY_31	Egypt	EPI_ISL_483036	male	50	live	unknown
EGY_32	Egypt	EPI_ISL_482765	female	33	live	unknown
EGY_33	Egypt	EPI_ISL_469275	female	40	live	Pharyngeal swab
EGY_34	Egypt	EPI_ISL_475746	male	41	live	unknown
EGY_35	Egypt	EPI_ISL_482773	female	33	live	unknown
EGY_4	Egypt	EPI_ISL_482759	male	45	live	unknown
EGY_5	Egypt	EPI_ISL_482763	female	45	live	unknown	Obur hospital
EGY_6	Egypt	EPI_ISL_529031	male	35	released	Pharyngeal swab	Healthcare worker: Hospital worker at Cairo University (Abol-Reesh) Pediatric Hospital (CUSPH) Mounira, Cairo
EGY_7	Egypt	EPI_ISL_482775	female	0.1	live	unknown	pediatric hospital ASU
EGY_8	Egypt	EPI_ISL_482760	male	35	live	unknown	Obur hospital
EGY_9	Egypt	EPI_ISL_430820	male	5	live	Pharyngeal swab
GMB_1	Gambia	EPI_ISL_471167	male	23	released	unknown
GMB_10	Gambia	EPI_ISL_471159	male	62	recovered	unknown
GMB_11	Gambia	EPI_ISL_471161	male	31	released	unknown
GMB_12	Gambia	EPI_ISL_471160	female	28	released	unknown
GMB_13	Gambia	EPI_ISL_428856	male	70	deceased	unknown	case 2 day 0
GMB_2	Gambia	EPI_ISL_471171	male	58	released	unknown
GMB_3	Gambia	EPI_ISL_471166	male	23	released	unknown
GMB_4	Gambia	EPI_ISL_471169	male	69	released	unknown
GMB_5	Gambia	EPI_ISL_471168	male	6	released	unknown
GMB_6	Gambia	EPI_ISL_471164	male	21	released	unknown
GMB_7	Gambia	EPI_ISL_428855	female	28	released	Pharyngeal swab	case 1 day 0
GMB_8	Gambia	EPI_ISL_471163	female	22	released	unknown
GMB_9	Gambia	EPI_ISL_471158	male	20	released	unknown
GHA_1	Ghana	EPI_ISL_628750	male	40	live	sputum
GHA_10	Ghana	EPI_ISL_628761	male	36	live	sputum
GHA_11	Ghana	EPI_ISL_628756	male	53	live	sputum
GHA_12	Ghana	EPI_ISL_648124	male	39	live	sputum
GHA_13	Ghana	EPI_ISL_628760	male	16	live	sputum
GHA_14	Ghana	EPI_ISL_628757	male	0	live	sputum
GHA_15	Ghana	EPI_ISL_648125	male	30	live	sputum
GHA_2	Ghana	EPI_ISL_628751	male	40	live	sputum
GHA_3	Ghana	EPI_ISL_628752	female	21	live	sputum
GHA_4	Ghana	EPI_ISL_628753	male	17	live	sputum
GHA_5	Ghana	EPI_ISL_628754	male	19	live	sputum
GHA_6	Ghana	EPI_ISL_648126	male	37	live	sputum
GHA_7	Ghana	EPI_ISL_628755	male	49	live	sputum
GHA_8	Ghana	EPI_ISL_648127	male	49	live	sputum
GHA_9	Ghana	EPI_ISL_628759	male	42	live	sputum
MDG_1	Madagascar	EPI_ISL_508862	female	43	released	Pharyngeal swab	A&C Hôtel restaurant et SPA. Traveled from France
MDG_2	Madagascar	EPI_ISL_508863	female	81	released	Pharyngeal swab	Traveled from France
MDG_3	Madagascar	EPI_ISL_625456	male	32	released	Pharyngeal swab
MAR_1	Morocco	EPI_ISL_471457	male	28	released	Pharyngeal swab
MAR_2	Morocco	EPI_ISL_471460	male	40	released	Pharyngeal swab
MAR_3	Morocco	EPI_ISL_467299	male	25	live	Pharyngeal swab
MAR_4	Morocco	EPI_ISL_471456	male	48	released	Pharyngeal swab
MAR_5	Morocco	EPI_ISL_471459	male	32	released	Pharyngeal swab
MAR_6	Morocco	EPI_ISL_471458	male	36	released	Pharyngeal swab
MOZ_1	Mozambique	EPI_ISL_636979	male	58	live	Pharyngeal swab
MOZ_2	Mozambique	EPI_ISL_636975	female	51	live	Pharyngeal swab
MOZ_3	Mozambique	EPI_ISL_636978	male	28	live	Pharyngeal swab
MOZ_4	Mozambique	EPI_ISL_636977	male	32	live	Pharyngeal swab
MOZ_5	Mozambique	EPI_ISL_636976	female	34	live	Pharyngeal swab
MOZ_6	Mozambique	EPI_ISL_636980	male	27	live	Pharyngeal swab
MOZ_7	Mozambique	EPI_ISL_636981	male	19	live	Pharyngeal swab
NGA_10	Nigeria	EPI_ISL_455424	female	45	live	saliva and Pharyngeal swab
NGA_11	Nigeria	EPI_ISL_413550	male	44	live	sputum	Traveled from Italy
NGA_13	Nigeria	EPI_ISL_455413	male	25	live	saliva and Pharyngeal swab
NGA_14	Nigeria	EPI_ISL_455429	male	58	live	saliva and Pharyngeal swab
NGA_15	Nigeria	EPI_ISL_487090	male	55	live	Pharyngeal swab
NGA_16	Nigeria	EPI_ISL_455362	male	41	isolation	saliva and Pharyngeal swab
NGA_17	Nigeria	EPI_ISL_455425	male	17	live	saliva and Pharyngeal swab
NGA_18	Nigeria	EPI_ISL_455412	female	30	live	Pharyngeal swab
NGA_19	Nigeria	EPI_ISL_455426	female	38	live	saliva and Pharyngeal swab
NGA_2	Nigeria	EPI_ISL_487098	male	45	live	unknown
NGA_20	Nigeria	EPI_ISL_455430	male	62	live	Pharyngeal swab
NGA_21	Nigeria	EPI_ISL_455427	male	41	live	saliva and Pharyngeal swab
NGA_22	Nigeria	EPI_ISL_455431	male	43	live	saliva and Pharyngeal swab
NGA_23	Nigeria	EPI_ISL_522548	male	47	live	unknown	Patient infected while traveling in Europe
NGA_3	Nigeria	EPI_ISL_455422	male	21	live	saliva and Pharyngeal swab
NGA_6	Nigeria	EPI_ISL_455419	male	48	live	unknown
NGA_7	Nigeria	EPI_ISL_455423	female	45	live	unknown
NGA_9	Nigeria	EPI_ISL_455418	male	7	live	saliva and Pharyngeal swab
RWA_1	Rwanda	EPI_ISL_707771	male	36	live	unknown
RWA_10	Rwanda	EPI_ISL_615075	male	23	live	Pharyngeal swab
RWA_11	Rwanda	EPI_ISL_707783	male	32	live	unknown
RWA_12	Rwanda	EPI_ISL_707711	male	23	live	unknown
RWA_13	Rwanda	EPI_ISL_615063	male	33	live	Pharyngeal swab
RWA_14	Rwanda	EPI_ISL_707779	male	24	live	unknown
RWA_15	Rwanda	EPI_ISL_707788	male	41	live	unknown
RWA_16	Rwanda	EPI_ISL_614763	male	52	live	Pharyngeal swab
RWA_17	Rwanda	EPI_ISL_615064	male	30	live	Pharyngeal swab
RWA_18	Rwanda	EPI_ISL_707774	male	35	live	unknown
RWA_19	Rwanda	EPI_ISL_707789	female	55	live	unknown
RWA_2	Rwanda	EPI_ISL_707712	male	48	live	unknown
RWA_20	Rwanda	EPI_ISL_615069	male	40	live	Pharyngeal swab
RWA_21	Rwanda	EPI_ISL_707777	male	46	live	unknown
RWA_22	Rwanda	EPI_ISL_614980	male	35	live	Pharyngeal swab
RWA_23	Rwanda	EPI_ISL_707790	male	30	live	unknown
RWA_24	Rwanda	EPI_ISL_615066	male	52	live	Pharyngeal swab
RWA_25	Rwanda	EPI_ISL_615071	male	23	live	Pharyngeal swab
RWA_26	Rwanda	EPI_ISL_707776	male	38	live	unknown
RWA_27	Rwanda	EPI_ISL_615067	male	58	live	Pharyngeal swab
RWA_3	Rwanda	EPI_ISL_707780	female	36	live	unknown
RWA_4	Rwanda	EPI_ISL_614892	male	40	live	Pharyngeal swab
RWA_5	Rwanda	EPI_ISL_707713	male	39	live	unknown
RWA_6	Rwanda	EPI_ISL_707773	male	41	live	unknown
RWA_7	Rwanda	EPI_ISL_615074	male	28	live	Pharyngeal swab
RWA_8	Rwanda	EPI_ISL_614891	male	58	live	Pharyngeal swab
RWA_9	Rwanda	EPI_ISL_707772	male	40	live	unknown
SEN_1	Senegal	EPI_ISL_481235	male	74	released	Pharyngeal swab
SEN_10	Senegal	EPI_ISL_482876	male	45	released	Pharyngeal swab
SEN_100	Senegal	EPI_ISL_480554	male	40	released	Pharyngeal swab
SEN_101	Senegal	EPI_ISL_476516	male	39	released	Pharyngeal swab
SEN_102	Senegal	EPI_ISL_480782	male	46	released	Pharyngeal swab
SEN_103	Senegal	EPI_ISL_486863	male	36	released	Pharyngeal swab
SEN_104	Senegal	EPI_ISL_498233	male	30	released	Pharyngeal swab
SEN_105	Senegal	EPI_ISL_498245	female	30	released	Pharyngeal swab
SEN_106	Senegal	EPI_ISL_477159	female	37	released	Pharyngeal swab
SEN_107	Senegal	EPI_ISL_476492	female	23	released	Pharyngeal swab
SEN_108	Senegal	EPI_ISL_486857	male	48	released	Pharyngeal swab
SEN_109	Senegal	EPI_ISL_476560	male	30	released	Pharyngeal swab
SEN_11	Senegal	EPI_ISL_476570	female	49	released	Pharyngeal swab
SEN_110	Senegal	EPI_ISL_498249	male	40	released	Pharyngeal swab
SEN_111	Senegal	EPI_ISL_477155	female	10	released	Pharyngeal swab
SEN_112	Senegal	EPI_ISL_420077	male	42	released	Pharyngeal swab
SEN_113	Senegal	EPI_ISL_418209	female	33	released	Pharyngeal swab
SEN_114	Senegal	EPI_ISL_476515	female	46	released	Pharyngeal swab
SEN_115	Senegal	EPI_ISL_418213	male	3	released	Pharyngeal swab
SEN_116	Senegal	EPI_ISL_486860	female	20	released	Pharyngeal swab
SEN_117	Senegal	EPI_ISL_498230	male	41	released	Pharyngeal swab
SEN_118	Senegal	EPI_ISL_477143	male	32	released	Pharyngeal swab
SEN_119	Senegal	EPI_ISL_485717	female	5	released	Pharyngeal swab
SEN_12	Senegal	EPI_ISL_485711	female	16	released	Pharyngeal swab
SEN_120	Senegal	EPI_ISL_485635	female	35	released	Pharyngeal swab
SEN_121	Senegal	EPI_ISL_498244	female	52	released	Pharyngeal swab
SEN_122	Senegal	EPI_ISL_477158	male	74	released	Pharyngeal swab
SEN_123	Senegal	EPI_ISL_476493	male	30	released	Pharyngeal swab
SEN_124	Senegal	EPI_ISL_418208	female	68	released	Pharyngeal swab
SEN_125	Senegal	EPI_ISL_498248	male	26	released	Pharyngeal swab
SEN_126	Senegal	EPI_ISL_420076	male	39	released	Pharyngeal swab	imported case
SEN_127	Senegal	EPI_ISL_477154	female	28	released	Pharyngeal swab
SEN_128	Senegal	EPI_ISL_476514	female	23	released	Pharyngeal swab
SEN_129	Senegal	EPI_ISL_480556	male	39	released	Pharyngeal swab
SEN_13	Senegal	EPI_ISL_476151	male	14	released	Pharyngeal swab
SEN_130	Senegal	EPI_ISL_498252	male	20	released	Pharyngeal swab
SEN_131	Senegal	EPI_ISL_418212	female	50	released	Pharyngeal swab	family cluster
SEN_132	Senegal	EPI_ISL_485716	male	20	released	Pharyngeal swab
SEN_133	Senegal	EPI_ISL_477142	male	37	released	Pharyngeal swab
SEN_134	Senegal	EPI_ISL_498231	female	38	released	Pharyngeal swab
SEN_135	Senegal	EPI_ISL_486861	male	43	released	Pharyngeal swab
SEN_14	Senegal	EPI_ISL_486866	male	23	released	Pharyngeal swab
SEN_15	Senegal	EPI_ISL_477145	female	31	released	Pharyngeal swab
SEN_16	Senegal	EPI_ISL_498236	male	32	released	Pharyngeal swab
SEN_17	Senegal	EPI_ISL_477149	female	36	released	unknown
SEN_18	Senegal	EPI_ISL_481240	male	42	released	Pharyngeal swab
SEN_19	Senegal	EPI_ISL_418215	male	66	live	Pharyngeal swab
SEN_2	Senegal	EPI_ISL_420071	female	56	released	Pharyngeal swab	cluster
SEN_20	Senegal	EPI_ISL_481234	male	69	released	Pharyngeal swab
SEN_21	Senegal	EPI_ISL_486871	male	36	released	Pharyngeal swab
SEN_22	Senegal	EPI_ISL_477152	female	75	released	Pharyngeal swab
SEN_23	Senegal	EPI_ISL_420070	male	70	released	Pharyngeal swab
SEN_24	Senegal	EPI_ISL_476495	male	40	released	Pharyngeal swab	contact
SEN_25	Senegal	EPI_ISL_498242	male	54	released	Pharyngeal swab
SEN_26	Senegal	EPI_ISL_481238	male	56	released	Pharyngeal swab
SEN_27	Senegal	EPI_ISL_482877	male	65	released	Pharyngeal swab
SEN_28	Senegal	EPI_ISL_480786	female	30	released	Pharyngeal swab
SEN_29	Senegal	EPI_ISL_498237	male	42	released	Pharyngeal swab
SEN_3	Senegal	EPI_ISL_477153	male	20	released	unknown
SEN_30	Senegal	EPI_ISL_477144	male	70	released	Pharyngeal swab
SEN_31	Senegal	EPI_ISL_486867	female	78	released	Pharyngeal swab
SEN_32	Senegal	EPI_ISL_485710	female	32	released	Pharyngeal swab
SEN_33	Senegal	EPI_ISL_476150	female	44	released	Pharyngeal swab
SEN_34	Senegal	EPI_ISL_418214	female	7	released	Pharyngeal swab
SEN_35	Senegal	EPI_ISL_477148	female	24	released	Pharyngeal swab
SEN_36	Senegal	EPI_ISL_476564	female	23	released	Pharyngeal swab
SEN_37	Senegal	EPI_ISL_486872	female	34	released	Pharyngeal swab
SEN_38	Senegal	EPI_ISL_477151	female	25	released	Pharyngeal swab
SEN_39	Senegal	EPI_ISL_420073	male	42	released	Pharyngeal swab	imported case
SEN_4	Senegal	EPI_ISL_486870	male	43	released	Pharyngeal swab
SEN_40	Senegal	EPI_ISL_481237	female	30	released	Pharyngeal swab
SEN_41	Senegal	EPI_ISL_498241	male	69	released	Pharyngeal swab
SEN_42	Senegal	EPI_ISL_476149	female	7	released	Pharyngeal swab
SEN_43	Senegal	EPI_ISL_485713	female	30	released	Pharyngeal swab
SEN_44	Senegal	EPI_ISL_498234	male	21	released	Pharyngeal swab
SEN_45	Senegal	EPI_ISL_477147	male	55	released	unknown	suspected case
SEN_46	Senegal	EPI_ISL_486864	male	54	released	Pharyngeal swab
SEN_47	Senegal	EPI_ISL_482874	male	43	released	Pharyngeal swab
SEN_48	Senegal	EPI_ISL_476572	female	34	released	Pharyngeal swab
SEN_49	Senegal	EPI_ISL_482878	female	42	released	Pharyngeal swab
SEN_5	Senegal	EPI_ISL_476566	male	32	released	unknown
SEN_50	Senegal	EPI_ISL_480789	male	43	released	Pharyngeal swab
SEN_51	Senegal	EPI_ISL_420069	male	45	released	Pharyngeal swab	imported case
SEN_52	Senegal	EPI_ISL_498238	male	63	released	Pharyngeal swab
SEN_53	Senegal	EPI_ISL_486868	male	50	released	Pharyngeal swab
SEN_54	Senegal	EPI_ISL_418217	female	68	released	Pharyngeal swab
SEN_55	Senegal	EPI_ISL_420072	male	60	released	Pharyngeal swab
SEN_56	Senegal	EPI_ISL_477150	male	38	released	Pharyngeal swab
SEN_57	Senegal	EPI_ISL_486873	male	57	released	Pharyngeal swab
SEN_58	Senegal	EPI_ISL_481236	male	30	released	Pharyngeal swab
SEN_59	Senegal	EPI_ISL_476148	female	40	released	Pharyngeal swab
SEN_6	Senegal	EPI_ISL_476494	male	42	released	Pharyngeal swab
SEN_60	Senegal	EPI_ISL_485708	female	45	released	Pharyngeal swab
SEN_61	Senegal	EPI_ISL_498240	female	45	released	Pharyngeal swab
SEN_62	Senegal	EPI_ISL_476497	male	82	released	Pharyngeal swab
SEN_63	Senegal	EPI_ISL_476569	female	68	released	Pharyngeal swab
SEN_64	Senegal	EPI_ISL_486865	male	65	released	Pharyngeal swab
SEN_65	Senegal	EPI_ISL_477146	male	58	released	Pharyngeal swab
SEN_66	Senegal	EPI_ISL_498235	female	30	released	Pharyngeal swab
SEN_67	Senegal	EPI_ISL_481220	male	53	released	Pharyngeal swab
SEN_68	Senegal	EPI_ISL_485712	male	20	released	Pharyngeal swab
SEN_69	Senegal	EPI_ISL_482875	male	55	released	Pharyngeal swab
SEN_7	Senegal	EPI_ISL_481239	female	58	released	Pharyngeal swab
SEN_70	Senegal	EPI_ISL_480788	female	47	released	Pharyngeal swab
SEN_71	Senegal	EPI_ISL_418216	male	51	live	Pharyngeal swab	Imported case (Madrid-Dakar)
SEN_72	Senegal	EPI_ISL_486869	male	38	released	Pharyngeal swab
SEN_73	Senegal	EPI_ISL_498239	female	63	released	Pharyngeal swab
SEN_74	Senegal	EPI_ISL_481243	female	62	released	Pharyngeal swab
SEN_75	Senegal	EPI_ISL_486859	male	29	released	Pharyngeal swab
SEN_76	Senegal	EPI_ISL_418207	male	80	released	Pharyngeal swab
SEN_77	Senegal	EPI_ISL_420079	male	28	released	Pharyngeal swab
SEN_78	Senegal	EPI_ISL_498247	male	3	released	Pharyngeal swab
SEN_79	Senegal	EPI_ISL_420075	male	36	released	unknown
SEN_8	Senegal	EPI_ISL_498243	male	83	released	Pharyngeal swab
SEN_80	Senegal	EPI_ISL_477157	male	82	released	Pharyngeal swab
SEN_81	Senegal	EPI_ISL_476562	male	21	released	Pharyngeal swab
SEN_82	Senegal	EPI_ISL_418211	female	42	released	Pharyngeal swab	family cluster
SEN_83	Senegal	EPI_ISL_498251	female	0.25	released	Pharyngeal swab
SEN_84	Senegal	EPI_ISL_476574	female	20	released	Pharyngeal swab
SEN_85	Senegal	EPI_ISL_480783	male	75	released	Pharyngeal swab
SEN_86	Senegal	EPI_ISL_477141	male	35	released	Pharyngeal swab
SEN_87	Senegal	EPI_ISL_498232	male	27	released	Pharyngeal swab
SEN_88	Senegal	EPI_ISL_486862	female	37	released	Pharyngeal swab
SEN_89	Senegal	EPI_ISL_485715	male	11	released	Pharyngeal swab
SEN_9	Senegal	EPI_ISL_480787	female	51	released	unknown
SEN_90	Senegal	EPI_ISL_476491	male	20	released	Pharyngeal swab
SEN_91	Senegal	EPI_ISL_420078	female	40	released	Pharyngeal swab	cluster
SEN_92	Senegal	EPI_ISL_498229	female	62	released	Pharyngeal swab
SEN_93	Senegal	EPI_ISL_498246	male	3	released	Pharyngeal swab
SEN_94	Senegal	EPI_ISL_418206	male	33	released	Pharyngeal swab
SEN_95	Senegal	EPI_ISL_477156	male	23	released	Pharyngeal swab
SEN_96	Senegal	EPI_ISL_420074	male	52	released	Pharyngeal swab
SEN_97	Senegal	EPI_ISL_476558	female	5	released	Pharyngeal swab
SEN_98	Senegal	EPI_ISL_498250	male	70	released	Pharyngeal swab
SEN_99	Senegal	EPI_ISL_418210	male	55	released	Pharyngeal swab	Imported case (Cesena-Dakar)
ZAF_1	South Africa	EPI_ISL_535432	female	18	live	Pharyngeal swab	King Cetshwayo
ZAF_10	South Africa	EPI_ISL_602729	female	39	live	Pharyngeal swab	uMkhanyakude
ZAF_100	South Africa	EPI_ISL_509349	female	20	live	Pharyngeal swab	Uthukela
ZAF_1000	South Africa	EPI_ISL_529734	female	37	live	Pharyngeal swab
ZAF_1001	South Africa	EPI_ISL_660626	male	59	live	Pharyngeal swab
ZAF_1002	South Africa	EPI_ISL_515586	female	57	live	Pharyngeal swab
ZAF_1003	South Africa	EPI_ISL_602754	female	13	live	Pharyngeal swab	Ilembe
ZAF_1004	South Africa	EPI_ISL_660649	female	40	live	Pharyngeal swab
ZAF_1005	South Africa	EPI_ISL_535420	female	72	live	Pharyngeal swab	Umgungundlovu
ZAF_1006	South Africa	EPI_ISL_602851	male	50	live	Pharyngeal swab	eThekwini
ZAF_1007	South Africa	EPI_ISL_605785	female	29	live	Pharyngeal swab
ZAF_1008	South Africa	EPI_ISL_509303	male	30	live	Pharyngeal swab	eThekwini
ZAF_1009	South Africa	EPI_ISL_509255	female	34	live	Pharyngeal swab	uThukela
ZAF_101	South Africa	EPI_ISL_509326	female	35	live	Pharyngeal swab	Amajuba
ZAF_1011	South Africa	EPI_ISL_515709	female	44	live	Pharyngeal swab
ZAF_1012	South Africa	EPI_ISL_602907	female	38	live	Pharyngeal swab	Ilembe
ZAF_1013	South Africa	EPI_ISL_635013	male	14	live	Pharyngeal swab
ZAF_1014	South Africa	EPI_ISL_498063	female	21	live	Pharyngeal swab
ZAF_1015	South Africa	EPI_ISL_487294	female	33	live	Pharyngeal swab	Zululand
ZAF_1017	South Africa	EPI_ISL_602690	male	37	live	Pharyngeal swab	eThekwini
ZAF_1018	South Africa	EPI_ISL_535519	female	36	live	Pharyngeal swab	Ilembe
ZAF_1019	South Africa	EPI_ISL_660157	female	18	live	Pharyngeal swab	CC2
ZAF_102	South Africa	EPI_ISL_515687	female	55	live	Pharyngeal swab
ZAF_1020	South Africa	EPI_ISL_515766	male	13	live	Pharyngeal swab
ZAF_1021	South Africa	EPI_ISL_515863	female	21	live	Pharyngeal swab
ZAF_1022	South Africa	EPI_ISL_487305	male	73	live	Pharyngeal swab	Ugu
ZAF_1023	South Africa	EPI_ISL_602896	male	60	live	Pharyngeal swab	Ilembe
ZAF_1024	South Africa	EPI_ISL_602793	male	60	live	Pharyngeal swab	uMkhanyakude
ZAF_1025	South Africa	EPI_ISL_509339	female	49	live	Pharyngeal swab	Umgungundlovu
ZAF_1026	South Africa	EPI_ISL_529761	male	22	live	Pharyngeal swab
ZAF_1027	South Africa	EPI_ISL_515698	female	80	live	Pharyngeal swab
ZAF_1028	South Africa	EPI_ISL_515665	male	1	live	Pharyngeal swab
ZAF_1029	South Africa	EPI_ISL_509356	male	10	live	Pharyngeal swab	Ilembe
ZAF_103	South Africa	EPI_ISL_529783	female	20	live	Pharyngeal swab
ZAF_1030	South Africa	EPI_ISL_602701	female	43	live	Pharyngeal swab	eThekwini
ZAF_1031	South Africa	EPI_ISL_535475	female	18	live	Pharyngeal swab	Ugu
ZAF_1032	South Africa	EPI_ISL_602804	male	39	live	Pharyngeal swab	Zululand
ZAF_1033	South Africa	EPI_ISL_535488	female	27	live	Pharyngeal swab	Ugu
ZAF_1034	South Africa	EPI_ISL_535538	female	84	live	Pharyngeal swab	Ilembe
ZAF_1035	South Africa	EPI_ISL_495548	female	54	live	Pharyngeal swab
ZAF_1036	South Africa	EPI_ISL_660252	female	53	live	Pharyngeal swab
ZAF_1037	South Africa	EPI_ISL_515842	female	66	live	Pharyngeal swab
ZAF_1038	South Africa	EPI_ISL_660176	female	66	live	Pharyngeal swab
ZAF_1039	South Africa	EPI_ISL_515747	female	21	live	Pharyngeal swab
ZAF_104	South Africa	EPI_ISL_602874	male	53	live	Pharyngeal swab	Ugu
ZAF_1040	South Africa	EPI_ISL_515728	female	52	live	Pharyngeal swab
ZAF_1041	South Africa	EPI_ISL_509289	male	37	live	Pharyngeal swab	Zululand
ZAF_1042	South Africa	EPI_ISL_509274	male	51	live	Pharyngeal swab	uThukela
ZAF_1043	South Africa	EPI_ISL_602623	male	51	live	Pharyngeal swab	eThekwini
ZAF_1044	South Africa	EPI_ISL_495527	male	26	live	Pharyngeal swab
ZAF_1045	South Africa	EPI_ISL_602926	male	23	live	Pharyngeal swab	eThekwini
ZAF_1047	South Africa	EPI_ISL_635032	male	11	live	Pharyngeal swab
ZAF_1048	South Africa	EPI_ISL_634996	male	28	live	Pharyngeal swab
ZAF_1049	South Africa	EPI_ISL_535454	male	20	live	Pharyngeal swab	ugu
ZAF_105	South Africa	EPI_ISL_535405	female	38	live	Pharyngeal swab	Umzinyathi
ZAF_1050	South Africa	EPI_ISL_602825	female	20	live	Pharyngeal swab	umkhanyakude
ZAF_1051	South Africa	EPI_ISL_602720	male	51	live	Pharyngeal swab	Harry Gwala
ZAF_1052	South Africa	EPI_ISL_660652	male	79	live	Pharyngeal swab
ZAF_1054	South Africa	EPI_ISL_529740	male	64	live	Pharyngeal swab
ZAF_1055	South Africa	EPI_ISL_515644	female	13	live	Pharyngeal swab
ZAF_1056	South Africa	EPI_ISL_509318	female	25	live	Pharyngeal swab	Zululand
ZAF_1057	South Africa	EPI_ISL_529723	female	37	live	Pharyngeal swab
ZAF_1058	South Africa	EPI_ISL_515627	male	30	live	Pharyngeal swab
ZAF_1059	South Africa	EPI_ISL_602829	female	72	live	Pharyngeal swab	Umkhanyakude
ZAF_106	South Africa	EPI_ISL_602889	male	39	live	Pharyngeal swab	eThekwini
ZAF_1060	South Africa	EPI_ISL_535458	male	24	live	Pharyngeal swab	Ugu
ZAF_1061	South Africa	EPI_ISL_660631	male	42	live	Pharyngeal swab
ZAF_1062	South Africa	EPI_ISL_602743	male	36	live	Pharyngeal swab	Umzinyathi
ZAF_1063	South Africa	EPI_ISL_515591	male	47	live	Pharyngeal swab	CH3
ZAF_1064	South Africa	EPI_ISL_602846	female	29	live	Pharyngeal swab
ZAF_1065	South Africa	EPI_ISL_487328	female	59	live	Pharyngeal swab	eThekwini
ZAF_1067	South Africa	EPI_ISL_498122	female	21	live	Pharyngeal swab
ZAF_1068	South Africa	EPI_ISL_515648	female	25	live	Pharyngeal swab
ZAF_1069	South Africa	EPI_ISL_509314	female	26	live	Pharyngeal swab	Amajuba
ZAF_107	South Africa	EPI_ISL_498110	female	35	live	Pharyngeal swab
ZAF_1070	South Africa	EPI_ISL_535534	female	3	live	Pharyngeal swab
ZAF_1071	South Africa	EPI_ISL_635051	male	61	live	Pharyngeal swab
ZAF_1072	South Africa	EPI_ISL_602640	male	50	live	Pharyngeal swab	Umzinyathi
ZAF_1073	South Africa	EPI_ISL_495544	female	29	live	Pharyngeal swab
ZAF_1074	South Africa	EPI_ISL_660187	female	17	live	Pharyngeal swab
ZAF_1075	South Africa	EPI_ISL_515724	male	37	live	Pharyngeal swab
ZAF_1076	South Africa	EPI_ISL_509285	female	39	live	Pharyngeal swab	uThukela
ZAF_1077	South Africa	EPI_ISL_509278	male	69	live	Pharyngeal swab	uThukela
ZAF_1079	South Africa	EPI_ISL_660231	female	36	live	Pharyngeal swab
ZAF_108	South Africa	EPI_ISL_602771	female	35	live	Pharyngeal swab	uMkhanyakude
ZAF_1080	South Africa	EPI_ISL_482867	female	37	live	Pharyngeal swab
ZAF_1081	South Africa	EPI_ISL_487309	female	65	live	Pharyngeal swab	Umgungundlovu
ZAF_1082	South Africa	EPI_ISL_602867	male	27	live	Pharyngeal swab	King Cetshwayo
ZAF_1083	South Africa	EPI_ISL_535416	male	12	live	Pharyngeal swab	Zululand
ZAF_1084	South Africa	EPI_ISL_498103	male	46	live	Pharyngeal swab
ZAF_1085	South Africa	EPI_ISL_602762	female	58	live	Pharyngeal swab	sisonke
ZAF_1086	South Africa	EPI_ISL_509335	female	42	live	Pharyngeal swab	eThekwini
ZAF_1087	South Africa	EPI_ISL_515694	female	31	live	Pharyngeal swab
ZAF_1088	South Africa	EPI_ISL_515669	female	56	live	Pharyngeal swab
ZAF_1089	South Africa	EPI_ISL_529790	male	29	live	Pharyngeal swab
ZAF_109	South Africa	EPI_ISL_515784	female	16	live	Pharyngeal swab
ZAF_1090	South Africa	EPI_ISL_515606	male	60	live	Pharyngeal swab
ZAF_1091	South Africa	EPI_ISL_660610	female	43	live	Pharyngeal swab
ZAF_1092	South Africa	EPI_ISL_518047	male	51	live	Pharyngeal swab
ZAF_1093	South Africa	EPI_ISL_602808	male	51	live	Pharyngeal swab	eThekwini
ZAF_1094	South Africa	EPI_ISL_535479	male	24	live	Pharyngeal swab	Ilembe
ZAF_1095	South Africa	EPI_ISL_535484	male	21	live	Pharyngeal swab	Ilembe
ZAF_1096	South Africa	EPI_ISL_515800	female	55	live	Pharyngeal swab
ZAF_1097	South Africa	EPI_ISL_509259	male	41	live	Pharyngeal swab	uThukela
ZAF_1098	South Africa	EPI_ISL_660134	male	18	live	Pharyngeal swab	CC2
ZAF_1099	South Africa	EPI_ISL_515705	female	13	live	Pharyngeal swab
ZAF_11	South Africa	EPI_ISL_660634	female	39	live	Pharyngeal swab
ZAF_110	South Africa	EPI_ISL_660148	female	19	live	Pharyngeal swab	CC2
ZAF_1100	South Africa	EPI_ISL_498092	female	25	live	Pharyngeal swab
ZAF_1101	South Africa	EPI_ISL_487298	female	24	live	Pharyngeal swab	Zululand
ZAF_1102	South Africa	EPI_ISL_660210	male	67	live	Pharyngeal swab
ZAF_1103	South Africa	EPI_ISL_602661	male	37	live	Pharyngeal swab	Ugu
ZAF_1104	South Africa	EPI_ISL_535515	male	3	live	Pharyngeal swab
ZAF_1105	South Africa	EPI_ISL_515797	male	29	live	Pharyngeal swab
ZAF_1106	South Africa	EPI_ISL_515892	female	29	live	Pharyngeal swab
ZAF_1107	South Africa	EPI_ISL_509236	female	6	live	Pharyngeal swab
ZAF_1109	South Africa	EPI_ISL_515751	female	70	live	Pharyngeal swab
ZAF_111	South Africa	EPI_ISL_515779	male	40	live	Pharyngeal swab
ZAF_1110	South Africa	EPI_ISL_515854	female	46	live	Pharyngeal swab
ZAF_1111	South Africa	EPI_ISL_660244	female	26	live	Pharyngeal swab
ZAF_1113	South Africa	EPI_ISL_535541	male	46	live	Pharyngeal swab	King Cetshwayo
ZAF_1114	South Africa	EPI_ISL_602930	female	35	live	Pharyngeal swab	uMkhanyakude
ZAF_1115	South Africa	EPI_ISL_498054	female	4	live	Pharyngeal swab
ZAF_1116	South Africa	EPI_ISL_635024	male	19	live	Pharyngeal swab
ZAF_1117	South Africa	EPI_ISL_602635	female	45	live	Pharyngeal swab	uThukela
ZAF_1118	South Africa	EPI_ISL_495531	male	31	live	Pharyngeal swab
ZAF_1119	South Africa	EPI_ISL_509262	female	31	live	Pharyngeal swab	uThukela
ZAF_112	South Africa	EPI_ISL_515881	male	36	live	Pharyngeal swab
ZAF_1120	South Africa	EPI_ISL_602736	female	37	live	Pharyngeal swab	uMkhanyakude
ZAF_1121	South Africa	EPI_ISL_602833	female	17	live	Pharyngeal swab	Umkhanyakude
ZAF_1122	South Africa	EPI_ISL_535442	male	14	live	Pharyngeal swab	Ilembe
ZAF_1123	South Africa	EPI_ISL_529739	female	22	live	Pharyngeal swab
ZAF_1124	South Africa	EPI_ISL_634980	female	17	live	Pharyngeal swab
ZAF_1125	South Africa	EPI_ISL_509361	male	30	live	Pharyngeal swab	Ilembe
ZAF_1126	South Africa	EPI_ISL_605788	male	33	live	Pharyngeal swab	Zululand
ZAF_1127	South Africa	EPI_ISL_529756	male	48	live	Pharyngeal swab
ZAF_1128	South Africa	EPI_ISL_515652	female	24	live	Pharyngeal swab
ZAF_1129	South Africa	EPI_ISL_487332	female	31	live	Pharyngeal swab	eThekwini
ZAF_113	South Africa	EPI_ISL_509225	male	63	live	Pharyngeal swab	Umkhanyakude
ZAF_1130	South Africa	EPI_ISL_515576	female	34	live	Pharyngeal swab	CH4
ZAF_1131	South Africa	EPI_ISL_660644	female	59	live	Pharyngeal swab
ZAF_1132	South Africa	EPI_ISL_602759	female	34	live	Pharyngeal swab	uMkhanyakude
ZAF_1134	South Africa	EPI_ISL_602911	female	71	live	Pharyngeal swab	Zululand
ZAF_1135	South Africa	EPI_ISL_498088	female	24	live	Pharyngeal swab
ZAF_1136	South Africa	EPI_ISL_498075	female	38	live	Pharyngeal swab
ZAF_1137	South Africa	EPI_ISL_487282	male	31	live	Pharyngeal swab	eThekwini
ZAF_1138	South Africa	EPI_ISL_635005	male	34	live	Pharyngeal swab
ZAF_114	South Africa	EPI_ISL_602672	female	43	live	Pharyngeal swab	Zululand
ZAF_1140	South Africa	EPI_ISL_515888	female	15	live	Pharyngeal swab
ZAF_1141	South Africa	EPI_ISL_515875	female	43	live	Pharyngeal swab
ZAF_1143	South Africa	EPI_ISL_515770	female	58	live	Pharyngeal swab
ZAF_1144	South Africa	EPI_ISL_602686	female	37	live	Pharyngeal swab	eThekwini
ZAF_1145	South Africa	EPI_ISL_529777	female	28	live	Pharyngeal swab
ZAF_1146	South Africa	EPI_ISL_515673	female	51	live	Pharyngeal swab
ZAF_1147	South Africa	EPI_ISL_602778	female	21	live	Pharyngeal swab	Ilembe
ZAF_1148	South Africa	EPI_ISL_602785	female	31	live	Pharyngeal swab	sisonke
ZAF_1149	South Africa	EPI_ISL_487313	female	42	live	Pharyngeal swab	eThekwini
ZAF_115	South Africa	EPI_ISL_535506	female	37	live	Pharyngeal swab	Ilembe
ZAF_1150	South Africa	EPI_ISL_498119	female	31	live	Pharyngeal swab
ZAF_1152	South Africa	EPI_ISL_602812	male	29	live	Pharyngeal swab	eThekwini
ZAF_1153	South Africa	EPI_ISL_535463	male	72	live	Pharyngeal swab	Ugu
ZAF_1154	South Africa	EPI_ISL_602717	female	79	live	Pharyngeal swab	Umzinyathi
ZAF_1155	South Africa	EPI_ISL_509340	female	50	live	Pharyngeal swab	uThukela
ZAF_1156	South Africa	EPI_ISL_515682	male	34	live	Pharyngeal swab
ZAF_1157	South Africa	EPI_ISL_529786	female	9	live	Pharyngeal swab
ZAF_1158	South Africa	EPI_ISL_509323	female	43	live	Pharyngeal swab	Zululand
ZAF_1159	South Africa	EPI_ISL_602774	female	54	live	Pharyngeal swab	eThekwini
ZAF_1160	South Africa	EPI_ISL_602789	female	56	live	Pharyngeal swab
ZAF_1161	South Africa	EPI_ISL_535400	female	37	live	Pharyngeal swab	Ilembe
ZAF_1162	South Africa	EPI_ISL_602871	female	10	live	Pharyngeal swab	Zululand
ZAF_1163	South Africa	EPI_ISL_498115	male	19	live	Pharyngeal swab
ZAF_1164	South Africa	EPI_ISL_518051	female	53	live	Pharyngeal swab
ZAF_1165	South Africa	EPI_ISL_430297	female	39	live	Pharyngeal swab
ZAF_1166	South Africa	EPI_ISL_660606	male	60	live	Pharyngeal swab
ZAF_1167	South Africa	EPI_ISL_515610	female	49	live	Pharyngeal swab
ZAF_1168	South Africa	EPI_ISL_660206	male	79	live	Pharyngeal swab
ZAF_1169	South Africa	EPI_ISL_498084	female	33	live	Pharyngeal swab
ZAF_117	South Africa	EPI_ISL_498081	female	31	live	Pharyngeal swab
ZAF_1170	South Africa	EPI_ISL_635009	female	36	live	Pharyngeal swab
ZAF_1171	South Africa	EPI_ISL_498079	male	50	live	Pharyngeal swab
ZAF_1172	South Africa	EPI_ISL_482850	female	27	live	Pharyngeal swab	KE24, CH_3
ZAF_1173	South Africa	EPI_ISL_660122	female	18	live	Pharyngeal swab	CC2
ZAF_1174	South Africa	EPI_ISL_515713	male	29	live	Pharyngeal swab
ZAF_1176	South Africa	EPI_ISL_515884	female	57	live	Pharyngeal swab
ZAF_1177	South Africa	EPI_ISL_515879	male	19	live	Pharyngeal swab
ZAF_1178	South Africa	EPI_ISL_515781	female	60	live	Pharyngeal swab
ZAF_1179	South Africa	EPI_ISL_535503	female	34	live	Pharyngeal swab	Ilembe
ZAF_118	South Africa	EPI_ISL_602918	male	72	live	Pharyngeal swab	Zululand
ZAF_1180	South Africa	EPI_ISL_602677	female	23	live	Pharyngeal swab	Umgungundlovu
ZAF_1181	South Africa	EPI_ISL_660627	female	56	live	Pharyngeal swab
ZAF_1182	South Africa	EPI_ISL_529735	female	38	live	Pharyngeal swab
ZAF_1183	South Africa	EPI_ISL_515631	male	28	live	Pharyngeal swab
ZAF_1184	South Africa	EPI_ISL_509302	female	34	live	Pharyngeal swab	eThekwini
ZAF_1185	South Africa	EPI_ISL_605784	female	54	live	Pharyngeal swab	eThekwini
ZAF_1186	South Africa	EPI_ISL_535421	female	41	live	Pharyngeal swab	Umgungundlovu
ZAF_1187	South Africa	EPI_ISL_602850	female	20	live	Pharyngeal swab	ugu
ZAF_1189	South Africa	EPI_ISL_660648	male	24	live	Pharyngeal swab
ZAF_119	South Africa	EPI_ISL_482855	female	24	live	Pharyngeal swab
ZAF_1190	South Africa	EPI_ISL_515587	female	34	live	Pharyngeal swab
ZAF_1191	South Africa	EPI_ISL_660191	female	72	live	Pharyngeal swab
ZAF_1192	South Africa	EPI_ISL_515858	female	25	live	Pharyngeal swab
ZAF_1193	South Africa	EPI_ISL_602656	female	30	live	Pharyngeal swab	Amajuba
ZAF_1194	South Africa	EPI_ISL_495552	male	73	live	Pharyngeal swab
ZAF_1195	South Africa	EPI_ISL_660248	female	68	live	Pharyngeal swab
ZAF_1196	South Africa	EPI_ISL_535522	male	37	live	Pharyngeal swab	Ilembe
ZAF_1197	South Africa	EPI_ISL_635047	female	60	live	Pharyngeal swab
ZAF_1198	South Africa	EPI_ISL_635028	female	71	live	Pharyngeal swab
ZAF_1199	South Africa	EPI_ISL_482871	male	50	live	Pharyngeal swab
ZAF_12	South Africa	EPI_ISL_509280	female	31	live	Pharyngeal swab	uThukela
ZAF_120	South Africa	EPI_ISL_660203	female	27	live	Pharyngeal swab
ZAF_1200	South Africa	EPI_ISL_498058	female	17	live	Pharyngeal swab
ZAF_1201	South Africa	EPI_ISL_602639	male	66	live	Pharyngeal swab	eThekwini
ZAF_1202	South Africa	EPI_ISL_660227	female	20	live	Pharyngeal swab	CE1
ZAF_1203	South Africa	EPI_ISL_509293	female	8	live	Pharyngeal swab	Zululand
ZAF_1204	South Africa	EPI_ISL_535397	female	31	live	Pharyngeal swab	Ilembe
ZAF_1205	South Africa	EPI_ISL_515837	female	35	live	Pharyngeal swab
ZAF_1206	South Africa	EPI_ISL_515732	female	44	live	Pharyngeal swab
ZAF_1207	South Africa	EPI_ISL_660651	male	33	live	Pharyngeal swab
ZAF_1208	South Africa	EPI_ISL_487327	female	50	live	Pharyngeal swab	eThekwini
ZAF_1209	South Africa	EPI_ISL_602849	female	64	live	Pharyngeal swab	ugu
ZAF_121	South Africa	EPI_ISL_495519	female	38	live	Pharyngeal swab
ZAF_1210	South Africa	EPI_ISL_535438	male	23	live	Pharyngeal swab	King Cetshwayo
ZAF_1211	South Africa	EPI_ISL_515647	male	1	live	Pharyngeal swab
ZAF_1212	South Africa	EPI_ISL_529743	female	18	live	Pharyngeal swab
ZAF_1213	South Africa	EPI_ISL_634995	male	65	live	Pharyngeal swab
ZAF_1214	South Africa	EPI_ISL_515628	female	20	live	Pharyngeal swab
ZAF_1215	South Africa	EPI_ISL_487348	female	29	live	Pharyngeal swab	Zululand
ZAF_1216	South Africa	EPI_ISL_602826	male	31	live	Pharyngeal swab	uMkhanyakude
ZAF_1217	South Africa	EPI_ISL_535457	female	31	live	Pharyngeal swab	Ilembe
ZAF_1218	South Africa	EPI_ISL_602723	female	62	live	Pharyngeal swab	Ilembe
ZAF_1219	South Africa	EPI_ISL_509277	male	41	live	Pharyngeal swab	uThukela
ZAF_1220	South Africa	EPI_ISL_495524	female	35	live	Pharyngeal swab
ZAF_1221	South Africa	EPI_ISL_482868	female	37	live	Pharyngeal swab
ZAF_1222	South Africa	EPI_ISL_635031	female	46	live	Pharyngeal swab
ZAF_1224	South Africa	EPI_ISL_602925	female	27	live	Pharyngeal swab	uMkhanyakude
ZAF_1225	South Africa	EPI_ISL_660251	female	42	live	Pharyngeal swab
ZAF_1226	South Africa	EPI_ISL_482702	female	37	live	Pharyngeal swab
ZAF_1227	South Africa	EPI_ISL_515841	male	17	live	Pharyngeal swab
ZAF_1228	South Africa	EPI_ISL_660188	male	48	live	Pharyngeal swab
ZAF_1229	South Africa	EPI_ISL_515744	male	54	live	Pharyngeal swab
ZAF_123	South Africa	EPI_ISL_660127	male	18	live	Pharyngeal swab	CC2
ZAF_1230	South Africa	EPI_ISL_660175	female	21	live	Pharyngeal swab
ZAF_1231	South Africa	EPI_ISL_515609	male	13	live	Pharyngeal swab
ZAF_1232	South Africa	EPI_ISL_509355	female	29	live	Pharyngeal swab	Umgungundlovu
ZAF_1233	South Africa	EPI_ISL_602702	female	67	live	Pharyngeal swab	eThekwini
ZAF_1234	South Africa	EPI_ISL_602807	female	14	live	Pharyngeal swab	Umgungundlovu
ZAF_1236	South Africa	EPI_ISL_535476	female	43	live	Pharyngeal swab	ugu
ZAF_1237	South Africa	EPI_ISL_602895	female	38	live	Pharyngeal swab	Ilembe
ZAF_1238	South Africa	EPI_ISL_602868	female	22	live	Pharyngeal swab	Umkhanyakude
ZAF_1239	South Africa	EPI_ISL_487306	female	87	live	Pharyngeal swab	Ugu
ZAF_124	South Africa	EPI_ISL_515716	female	25	live	Pharyngeal swab
ZAF_1240	South Africa	EPI_ISL_535419	female	25	live	Pharyngeal swab	Umgungundlovu
ZAF_1241	South Africa	EPI_ISL_602790	male	12	live	Pharyngeal swab	Ilembe
ZAF_1242	South Africa	EPI_ISL_515666	female	38	live	Pharyngeal swab
ZAF_1243	South Africa	EPI_ISL_529762	male	25	live	Pharyngeal swab
ZAF_1245	South Africa	EPI_ISL_602693	male	63	live	Pharyngeal swab	eThekwini
ZAF_1246	South Africa	EPI_ISL_515765	male	1	live	Pharyngeal swab
ZAF_1247	South Africa	EPI_ISL_515798	female	19	live	Pharyngeal swab
ZAF_1248	South Africa	EPI_ISL_660154	male	13	live	Pharyngeal swab
ZAF_1249	South Africa	EPI_ISL_509239	female	3	live	Pharyngeal swab
ZAF_125	South Africa	EPI_ISL_421572	female	40	live	Pharyngeal swab
ZAF_1250	South Africa	EPI_ISL_515860	female	31	live	Pharyngeal swab
ZAF_1251	South Africa	EPI_ISL_509256	male	45	live	Pharyngeal swab	uThukela
ZAF_1252	South Africa	EPI_ISL_498060	female	22	live	Pharyngeal swab
ZAF_1253	South Africa	EPI_ISL_487297	female	57	live	Pharyngeal swab	uThukela
ZAF_1254	South Africa	EPI_ISL_482849	female	40	live	Pharyngeal swab
ZAF_1255	South Africa	EPI_ISL_635010	female	52	live	Pharyngeal swab
ZAF_1257	South Africa	EPI_ISL_602662	male	83	live	Pharyngeal swab	Ugu
ZAF_1258	South Africa	EPI_ISL_535516	female	38	live	Pharyngeal swab	Ilembe
ZAF_1259	South Africa	EPI_ISL_515769	female	67	live	Pharyngeal swab
ZAF_126	South Africa	EPI_ISL_509307	female	48	live	Pharyngeal swab	eThekwini
ZAF_1260	South Africa	EPI_ISL_660158	female	19	live	Pharyngeal swab	CC2
ZAF_1261	South Africa	EPI_ISL_515794	female	34	live	Pharyngeal swab
ZAF_1262	South Africa	EPI_ISL_509235	female	39	live	Pharyngeal swab
ZAF_1263	South Africa	EPI_ISL_515891	female	45	live	Pharyngeal swab
ZAF_1264	South Africa	EPI_ISL_515803	male	12	live	Pharyngeal swab
ZAF_1265	South Africa	EPI_ISL_515706	female	57	live	Pharyngeal swab
ZAF_1267	South Africa	EPI_ISL_602908	female	48	live	Pharyngeal swab	Zululand
ZAF_1268	South Africa	EPI_ISL_498091	female	21	live	Pharyngeal swab
ZAF_1269	South Africa	EPI_ISL_660213	female	21	live	Pharyngeal swab
ZAF_127	South Africa	EPI_ISL_602750	male	6	live	Pharyngeal swab
ZAF_1270	South Africa	EPI_ISL_515605	female	60	live	Pharyngeal swab
ZAF_1271	South Africa	EPI_ISL_509359	male	27	live	Pharyngeal swab	Ilembe
ZAF_1272	South Africa	EPI_ISL_660613	male	40	live	Pharyngeal swab
ZAF_1273	South Africa	EPI_ISL_535487	male	22	live	Pharyngeal swab	Ilembe
ZAF_1274	South Africa	EPI_ISL_518044	female	38	live	Pharyngeal swab
ZAF_1275	South Africa	EPI_ISL_498100	male	55	live	Pharyngeal swab
ZAF_1276	South Africa	EPI_ISL_602899	female	47	live	Pharyngeal swab	Ilembe
ZAF_1277	South Africa	EPI_ISL_535415	female	24	live	Pharyngeal swab	Amajuba
ZAF_1278	South Africa	EPI_ISL_602864	female	24	live	Pharyngeal swab	Ilembe
ZAF_1279	South Africa	EPI_ISL_602761	male	27	live	Pharyngeal swab	Umgungundlovu
ZAF_128	South Africa	EPI_ISL_515582	female	42	live	Pharyngeal swab
ZAF_1280	South Africa	EPI_ISL_509336	female	42	live	Pharyngeal swab	Amajuba
ZAF_1281	South Africa	EPI_ISL_529793	female	35	live	Pharyngeal swab
ZAF_1282	South Africa	EPI_ISL_515697	female	21	live	Pharyngeal swab
ZAF_1283	South Africa	EPI_ISL_515727	male	55	live	Pharyngeal swab
ZAF_1285	South Africa	EPI_ISL_509286	male	44	live	Pharyngeal swab	Zululand
ZAF_1286	South Africa	EPI_ISL_660232	male	21	live	Pharyngeal swab	CS1
ZAF_1287	South Africa	EPI_ISL_495528	male	28	live	Pharyngeal swab
ZAF_1288	South Africa	EPI_ISL_482864	female	34	live	Pharyngeal swab
ZAF_1289	South Africa	EPI_ISL_602929	female	47	live	Pharyngeal swab	uMkhanyakude
ZAF_129	South Africa	EPI_ISL_602855	female	44	live	Pharyngeal swab	uMkhanyakude
ZAF_1291	South Africa	EPI_ISL_635052	female	19	live	Pharyngeal swab
ZAF_1292	South Africa	EPI_ISL_535537	female	47	live	Pharyngeal swab	uMkhanyakude
ZAF_1293	South Africa	EPI_ISL_495547	female	34	live	Pharyngeal swab
ZAF_1294	South Africa	EPI_ISL_602643	female	30	live	Pharyngeal swab	Ugu
ZAF_1295	South Africa	EPI_ISL_515748	female	31	live	Pharyngeal swab
ZAF_1296	South Africa	EPI_ISL_660184	male	28	live	Pharyngeal swab
ZAF_1297	South Africa	EPI_ISL_660179	female	20	live	Pharyngeal swab
ZAF_1298	South Africa	EPI_ISL_515592	male	33	live	Pharyngeal swab
ZAF_1299	South Africa	EPI_ISL_602740	female	71	live	Pharyngeal swab	Ilembe
ZAF_130	South Africa	EPI_ISL_535424	female	71	live	Pharyngeal swab	Umgungundlovu
ZAF_1300	South Africa	EPI_ISL_498121	female	25	live	Pharyngeal swab
ZAF_1301	South Africa	EPI_ISL_535434	female	7	live	Pharyngeal swab
ZAF_1302	South Africa	EPI_ISL_602845	male	85	live	Pharyngeal swab	uMkhanyakude
ZAF_1303	South Africa	EPI_ISL_509317	female	28	live	Pharyngeal swab	King Cetshwayo
ZAF_1304	South Africa	EPI_ISL_634999	male	21	live	Pharyngeal swab
ZAF_1305	South Africa	EPI_ISL_515624	female	41	live	Pharyngeal swab
ZAF_1306	South Africa	EPI_ISL_529720	female	54	live	Pharyngeal swab
ZAF_1307	South Africa	EPI_ISL_660632	male	38	live	Pharyngeal swab
ZAF_1308	South Africa	EPI_ISL_535460	female	74	live	Pharyngeal swab	Ugu
ZAF_1309	South Africa	EPI_ISL_602811	male	63	live	Pharyngeal swab	Umkhanyakude
ZAF_131	South Africa	EPI_ISL_660622	male	57	live	Pharyngeal swab
ZAF_1310	South Africa	EPI_ISL_602714	female	28	live	Pharyngeal swab	eThekwini
ZAF_1311	South Africa	EPI_ISL_660609	male	21	live	Pharyngeal swab
ZAF_1312	South Africa	EPI_ISL_509343	male	52	live	Pharyngeal swab	Zululand
ZAF_1313	South Africa	EPI_ISL_515670	female	23	live	Pharyngeal swab
ZAF_1314	South Africa	EPI_ISL_529789	male	74	live	Pharyngeal swab
ZAF_1315	South Africa	EPI_ISL_529774	female	22	live	Pharyngeal swab
ZAF_1316	South Africa	EPI_ISL_602786	female	77	live	Pharyngeal swab	Umgungundlovu
ZAF_1317	South Africa	EPI_ISL_602883	female	27	live	Pharyngeal swab	Zululand
ZAF_1318	South Africa	EPI_ISL_487310	female	2	live	Pharyngeal swab
ZAF_1319	South Africa	EPI_ISL_515876	male	17	live	Pharyngeal swab
ZAF_132	South Africa	EPI_ISL_634989	female	56	live	Pharyngeal swab
ZAF_1320	South Africa	EPI_ISL_515773	male	34	live	Pharyngeal swab
ZAF_1322	South Africa	EPI_ISL_602685	female	30	live	Pharyngeal swab	eThekwini
ZAF_1323	South Africa	EPI_ISL_602678	female	33	live	Pharyngeal swab
ZAF_1324	South Africa	EPI_ISL_660209	female	57	live	Pharyngeal swab
ZAF_1325	South Africa	EPI_ISL_635006	female	17	live	Pharyngeal swab
ZAF_1326	South Africa	EPI_ISL_498076	female	44	live	Pharyngeal swab
ZAF_1327	South Africa	EPI_ISL_487281	female	51	live	Pharyngeal swab	eThekwini
ZAF_1328	South Africa	EPI_ISL_602912	female	36	live	Pharyngeal swab	eThekwini
ZAF_133	South Africa	EPI_ISL_509368	female	45	live	Pharyngeal swab	Ilembe
ZAF_1331	South Africa	EPI_ISL_509240	female	44	live	Pharyngeal swab	Umgungundlovu
ZAF_1332	South Africa	EPI_ISL_515651	male	39	live	Pharyngeal swab
ZAF_1333	South Africa	EPI_ISL_529755	male	69	live	Pharyngeal swab
ZAF_1334	South Africa	EPI_ISL_487331	male	26	live	Pharyngeal swab	eThekwini
ZAF_1335	South Africa	EPI_ISL_515588	female	60	live	Pharyngeal swab
ZAF_1336	South Africa	EPI_ISL_515575	female	51	live	Pharyngeal swab
ZAF_1337	South Africa	EPI_ISL_660647	male	14	live	Pharyngeal swab
ZAF_1338	South Africa	EPI_ISL_602735	female	12	live	Pharyngeal swab	King Cetshwayo
ZAF_1339	South Africa	EPI_ISL_660628	female	39	live	Pharyngeal swab
ZAF_134	South Africa	EPI_ISL_529730	male	35	live	Pharyngeal swab
ZAF_1340	South Africa	EPI_ISL_535441	female	32	live	Pharyngeal swab	Ugu
ZAF_1341	South Africa	EPI_ISL_602830	female	34	live	Pharyngeal swab	Amajuba
ZAF_1342	South Africa	EPI_ISL_509362	female	38	live	Pharyngeal swab	Ilembe
ZAF_1343	South Africa	EPI_ISL_634983	female	15	live	Pharyngeal swab
ZAF_1344	South Africa	EPI_ISL_635027	male	66	live	Pharyngeal swab
ZAF_1345	South Africa	EPI_ISL_498057	male	17	live	Pharyngeal swab
ZAF_1346	South Africa	EPI_ISL_535542	female	29	live	Pharyngeal swab	uMkhanyakude
ZAF_1347	South Africa	EPI_ISL_660228	male	30	live	Pharyngeal swab
ZAF_1348	South Africa	EPI_ISL_495532	female	38	live	Pharyngeal swab
ZAF_1349	South Africa	EPI_ISL_602636	male	68	live	Pharyngeal swab	uThukela
ZAF_135	South Africa	EPI_ISL_515634	female	38	live	Pharyngeal swab
ZAF_1350	South Africa	EPI_ISL_509261	female	27	live	Pharyngeal swab	uThukela
ZAF_1351	South Africa	EPI_ISL_515838	female	42	live	Pharyngeal swab
ZAF_1352	South Africa	EPI_ISL_535398	female	29	live	Pharyngeal swab	Ilembe
ZAF_1353	South Africa	EPI_ISL_515752	male	40	live	Pharyngeal swab
ZAF_1355	South Africa	EPI_ISL_515857	female	33	live	Pharyngeal swab
ZAF_1357	South Africa	EPI_ISL_417186	male	38	live	Pharyngeal swab
ZAF_1358	South Africa	EPI_ISL_660247	female	52	live	Pharyngeal swab
ZAF_1359	South Africa	EPI_ISL_602659	female	11	live	Pharyngeal swab	Umkhanyakude
ZAF_136	South Africa	EPI_ISL_495538	male	25	live	Pharyngeal swab
ZAF_1360	South Africa	EPI_ISL_635048	female	29	live	Pharyngeal swab
ZAF_1361	South Africa	EPI_ISL_482872	male	40	live	Pharyngeal swab
ZAF_1362	South Africa	EPI_ISL_660224	female	18	live	Pharyngeal swab	CE1
ZAF_1363	South Africa	EPI_ISL_535394	male	32	live	Pharyngeal swab	Amajuba
ZAF_1364	South Africa	EPI_ISL_515834	male	47	live	Pharyngeal swab
ZAF_1365	South Africa	EPI_ISL_509290	female	53	live	Pharyngeal swab	Zululand
ZAF_1366	South Africa	EPI_ISL_515731	male	25	live	Pharyngeal swab
ZAF_1367	South Africa	EPI_ISL_660192	female	41	live	Pharyngeal swab
ZAF_1368	South Africa	EPI_ISL_495551	female	23	live	Pharyngeal swab
ZAF_137	South Africa	EPI_ISL_660222	male	19	live	Pharyngeal swab	CS1
ZAF_1370	South Africa	EPI_ISL_602655	female	23	live	Pharyngeal swab	Amajuba
ZAF_1371	South Africa	EPI_ISL_635044	female	21	live	Pharyngeal swab
ZAF_1372	South Africa	EPI_ISL_535521	female	62	live	Pharyngeal swab	Ilembe
ZAF_1373	South Africa	EPI_ISL_509301	female	27	live	Pharyngeal swab	eThekwini
ZAF_1374	South Africa	EPI_ISL_605787	female	45	live	Pharyngeal swab	Ilembe
ZAF_1375	South Africa	EPI_ISL_529759	male	56	live	Pharyngeal swab
ZAF_1376	South Africa	EPI_ISL_602853	female	21	live	Pharyngeal swab	eThekwini
ZAF_1377	South Africa	EPI_ISL_535422	female	28	live	Pharyngeal swab	Zululand
ZAF_1378	South Africa	EPI_ISL_515584	male	38	live	Pharyngeal swab
ZAF_1379	South Africa	EPI_ISL_515579	female	40	live	Pharyngeal swab
ZAF_138	South Africa	EPI_ISL_535548	male	69	live	Pharyngeal swab	King Cetshwayo
ZAF_1380	South Africa	EPI_ISL_602756	female	69	live	Pharyngeal swab	Ilembe
ZAF_1381	South Africa	EPI_ISL_660624	female	55	live	Pharyngeal swab
ZAF_1382	South Africa	EPI_ISL_602739	female	71	live	Pharyngeal swab	Ilembe
ZAF_1383	South Africa	EPI_ISL_515632	female	28	live	Pharyngeal swab
ZAF_1384	South Africa	EPI_ISL_529736	male	69	live	Pharyngeal swab
ZAF_1385	South Africa	EPI_ISL_509223	male	50	live	Pharyngeal swab	uThukela
ZAF_1386	South Africa	EPI_ISL_515887	female	34	live	Pharyngeal swab
ZAF_1387	South Africa	EPI_ISL_515782	female	57	live	Pharyngeal swab
ZAF_1388	South Africa	EPI_ISL_535500	female	54	live	Pharyngeal swab	Ilembe
ZAF_1389	South Africa	EPI_ISL_602689	female	37	live	Pharyngeal swab	eThekwini
ZAF_139	South Africa	EPI_ISL_515737	male	36	live	Pharyngeal swab
ZAF_1390	South Africa	EPI_ISL_602674	male	44	live	Pharyngeal swab	uthungulu
ZAF_1391	South Africa	EPI_ISL_660205	female	1	live	Pharyngeal swab
ZAF_1392	South Africa	EPI_ISL_482853	male	29	live	Pharyngeal swab
ZAF_1393	South Africa	EPI_ISL_498087	male	42	live	Pharyngeal swab
ZAF_1394	South Africa	EPI_ISL_421574	female	44	live	Pharyngeal swab
ZAF_1395	South Africa	EPI_ISL_515710	female	44	live	Pharyngeal swab
ZAF_1396	South Africa	EPI_ISL_660121	female	18	live	Pharyngeal swab	CC2
ZAF_1397	South Africa	EPI_ISL_515815	male	81	live	Pharyngeal swab
ZAF_1398	South Africa	EPI_ISL_518052	female	36	live	Pharyngeal swab
ZAF_1399	South Africa	EPI_ISL_660605	female	61	live	Pharyngeal swab
ZAF_14	South Africa	EPI_ISL_515721	female	35	live	Pharyngeal swab
ZAF_140	South Africa	EPI_ISL_509296	female	54	live	Pharyngeal swab	Umgungundlovu
ZAF_1400	South Africa	EPI_ISL_602718	female	40	live	Pharyngeal swab	Umzinyathi
ZAF_1401	South Africa	EPI_ISL_515613	female	40	live	Pharyngeal swab
ZAF_1402	South Africa	EPI_ISL_529785	female	36	live	Pharyngeal swab
ZAF_1403	South Africa	EPI_ISL_529778	female	15	live	Pharyngeal swab
ZAF_1404	South Africa	EPI_ISL_515681	female	27	live	Pharyngeal swab
ZAF_1405	South Africa	EPI_ISL_509320	female	40	live	Pharyngeal swab	Umgungundlovu
ZAF_1406	South Africa	EPI_ISL_602777	male	43	live	Pharyngeal swab	eThekwini
ZAF_1407	South Africa	EPI_ISL_498116	female	12	live	Pharyngeal swab
ZAF_1408	South Africa	EPI_ISL_602872	female	38	live	Pharyngeal swab	uMkhanyakude
ZAF_1409	South Africa	EPI_ISL_535403	male	71	live	Pharyngeal swab	Umzinyathi
ZAF_141	South Africa	EPI_ISL_535392	female	24	live	Pharyngeal swab	Amajuba
ZAF_1411	South Africa	EPI_ISL_602924	female	67	live	Pharyngeal swab	Ilembe
ZAF_1412	South Africa	EPI_ISL_482869	female	49	live	Pharyngeal swab
ZAF_1413	South Africa	EPI_ISL_635030	male	14	live	Pharyngeal swab
ZAF_1414	South Africa	EPI_ISL_495525	female	40	live	Pharyngeal swab
ZAF_1415	South Africa	EPI_ISL_509276	male	6	live	Pharyngeal swab
ZAF_1416	South Africa	EPI_ISL_660174	male	35	live	Pharyngeal swab
ZAF_1417	South Africa	EPI_ISL_515745	male	45	live	Pharyngeal swab
ZAF_1418	South Africa	EPI_ISL_660189	male	1	live	Pharyngeal swab
ZAF_1419	South Africa	EPI_ISL_515840	male	40	live	Pharyngeal swab
ZAF_142	South Africa	EPI_ISL_515832	female	71	live	Pharyngeal swab
ZAF_1420	South Africa	EPI_ISL_660250	female	78	live	Pharyngeal swab
ZAF_1421	South Africa	EPI_ISL_482703	male	45	live	Pharyngeal swab
ZAF_1423	South Africa	EPI_ISL_515646	female	46	live	Pharyngeal swab
ZAF_1424	South Africa	EPI_ISL_602848	female	16	live	Pharyngeal swab	Zululand
ZAF_1425	South Africa	EPI_ISL_487326	female	28	live	Pharyngeal swab	eThekwini
ZAF_1426	South Africa	EPI_ISL_535439	female	79	live	Pharyngeal swab	King Cetshwayo
ZAF_1427	South Africa	EPI_ISL_660650	female	85	live	Pharyngeal swab
ZAF_1428	South Africa	EPI_ISL_602722	female	18	live	Pharyngeal swab	eThekwini
ZAF_1429	South Africa	EPI_ISL_602827	female	84	live	Pharyngeal swab	Umkhanyakude
ZAF_143	South Africa	EPI_ISL_660169	female	57	live	Pharyngeal swab
ZAF_1430	South Africa	EPI_ISL_535456	female	38	live	Pharyngeal swab	ugu
ZAF_1431	South Africa	EPI_ISL_515629	male	32	live	Pharyngeal swab
ZAF_1432	South Africa	EPI_ISL_634994	female	48	live	Pharyngeal swab
ZAF_1433	South Africa	EPI_ISL_515861	female	12	live	Pharyngeal swab
ZAF_1434	South Africa	EPI_ISL_509238	male	25	live	Pharyngeal swab	Zululand
ZAF_1435	South Africa	EPI_ISL_660155	female	19	live	Pharyngeal swab	CC2
ZAF_1436	South Africa	EPI_ISL_515799	female	44	live	Pharyngeal swab
ZAF_1437	South Africa	EPI_ISL_515764	male	43	live	Pharyngeal swab
ZAF_1438	South Africa	EPI_ISL_602692	female	44	live	Pharyngeal swab	eThekwini
ZAF_144	South Africa	EPI_ISL_660194	female	12	live	Pharyngeal swab
ZAF_1440	South Africa	EPI_ISL_602905	male	13	live	Pharyngeal swab
ZAF_1441	South Africa	EPI_ISL_482848	female	56	live	Pharyngeal swab	KE21, CH3
ZAF_1442	South Africa	EPI_ISL_487296	female	1	live	Pharyngeal swab
ZAF_1443	South Africa	EPI_ISL_498061	female	16	live	Pharyngeal swab
ZAF_1445	South Africa	EPI_ISL_509257	female	30	live	Pharyngeal swab	uThukela
ZAF_1446	South Africa	EPI_ISL_518049	female	42	live	Pharyngeal swab
ZAF_1447	South Africa	EPI_ISL_602806	female	55	live	Pharyngeal swab	uMkhanyakude
ZAF_1448	South Africa	EPI_ISL_535477	male	67	live	Pharyngeal swab	ugu
ZAF_1449	South Africa	EPI_ISL_602703	male	44	live	Pharyngeal swab	eThekwini
ZAF_145	South Africa	EPI_ISL_515758	male	23	live	Pharyngeal swab
ZAF_1450	South Africa	EPI_ISL_509354	female	47	live	Pharyngeal swab	uThukela
ZAF_1451	South Africa	EPI_ISL_515608	female	34	live	Pharyngeal swab
ZAF_1452	South Africa	EPI_ISL_529763	male	28	live	Pharyngeal swab
ZAF_1453	South Africa	EPI_ISL_515667	female	20	live	Pharyngeal swab
ZAF_1454	South Africa	EPI_ISL_602791	female	28	live	Pharyngeal swab	Ilembe
ZAF_1455	South Africa	EPI_ISL_487307	female	39	live	Pharyngeal swab	uThukela
ZAF_1456	South Africa	EPI_ISL_602869	female	36	live	Pharyngeal swab	uMkhanyakude
ZAF_1457	South Africa	EPI_ISL_535418	male	76	live	Pharyngeal swab	uThukela
ZAF_1459	South Africa	EPI_ISL_518045	female	32	live	Pharyngeal swab
ZAF_146	South Africa	EPI_ISL_535527	female	19	live	Pharyngeal swab	Ilembe
ZAF_1460	South Africa	EPI_ISL_535486	female	33	live	Pharyngeal swab	King Cetshwayo
ZAF_1461	South Africa	EPI_ISL_660612	female	12	live	Pharyngeal swab
ZAF_1462	South Africa	EPI_ISL_509358	male	32	live	Pharyngeal swab	Ilembe
ZAF_1463	South Africa	EPI_ISL_515604	female	47	live	Pharyngeal swab
ZAF_1464	South Africa	EPI_ISL_515696	male	64	live	Pharyngeal swab
ZAF_1465	South Africa	EPI_ISL_529792	female	29	live	Pharyngeal swab
ZAF_1466	South Africa	EPI_ISL_509337	male	85	live	Pharyngeal swab	Amajuba
ZAF_1467	South Africa	EPI_ISL_602760	female	8	live	Pharyngeal swab	Umkhanyakude
ZAF_1468	South Africa	EPI_ISL_535414	male	71	live	Pharyngeal swab	uThukela
ZAF_1469	South Africa	EPI_ISL_602865	male	25	live	Pharyngeal swab	Zululand
ZAF_147	South Africa	EPI_ISL_635042	male	65	live	Pharyngeal swab
ZAF_1470	South Africa	EPI_ISL_602898	female	16	live	Pharyngeal swab	Umkhanyakude
ZAF_1471	South Africa	EPI_ISL_498101	male	37	live	Pharyngeal swab
ZAF_1472	South Africa	EPI_ISL_515890	female	14	live	Pharyngeal swab
ZAF_1473	South Africa	EPI_ISL_509234	male	62	live	Pharyngeal swab	King Cetshwayo
ZAF_1474	South Africa	EPI_ISL_515795	female	39	live	Pharyngeal swab
ZAF_1475	South Africa	EPI_ISL_660159	male	20	live	Pharyngeal swab	CE1
ZAF_1476	South Africa	EPI_ISL_515768	female	15	live	Pharyngeal swab
ZAF_1477	South Africa	EPI_ISL_535517	female	30	live	Pharyngeal swab	Ilembe
ZAF_1478	South Africa	EPI_ISL_602663	male	67	live	Pharyngeal swab	eThekwini
ZAF_1479	South Africa	EPI_ISL_660212	female	27	live	Pharyngeal swab
ZAF_148	South Africa	EPI_ISL_602653	female	17	live	Pharyngeal swab	Umkhanyakude
ZAF_1480	South Africa	EPI_ISL_498090	female	56	live	Pharyngeal swab
ZAF_1481	South Africa	EPI_ISL_602909	female	40	live	Pharyngeal swab	Ilembe
ZAF_1482	South Africa	EPI_ISL_660136	female	19	live	Pharyngeal swab	CC2
ZAF_1483	South Africa	EPI_ISL_515707	female	61	live	Pharyngeal swab
ZAF_1484	South Africa	EPI_ISL_515802	female	53	live	Pharyngeal swab
ZAF_1485	South Africa	EPI_ISL_605790	female	55	live	Pharyngeal swab	Zululand
ZAF_1486	South Africa	EPI_ISL_509316	male	62	live	Pharyngeal swab	Umzinyathi
ZAF_1487	South Africa	EPI_ISL_535435	female	45	live	Pharyngeal swab	King Cetshwayo
ZAF_1488	South Africa	EPI_ISL_602844	male	64	live	Pharyngeal swab	Amajuba
ZAF_1489	South Africa	EPI_ISL_498120	male	17	live	Pharyngeal swab
ZAF_149	South Africa	EPI_ISL_495557	male	2	live	Pharyngeal swab
ZAF_1490	South Africa	EPI_ISL_602741	male	79	live	Pharyngeal swab	Umkhanyakude
ZAF_1491	South Africa	EPI_ISL_515593	female	38	live	Pharyngeal swab
ZAF_1493	South Africa	EPI_ISL_529721	female	31	live	Pharyngeal swab
ZAF_1494	South Africa	EPI_ISL_515625	female	20	live	Pharyngeal swab
ZAF_1495	South Africa	EPI_ISL_634998	female	34	live	Pharyngeal swab
ZAF_1496	South Africa	EPI_ISL_602928	female	34	live	Pharyngeal swab	Umgungundlovu
ZAF_1498	South Africa	EPI_ISL_482865	female	52	live	Pharyngeal swab
ZAF_1499	South Africa	EPI_ISL_495529	female	31	live	Pharyngeal swab
ZAF_150	South Africa	EPI_ISL_602630	female	27	live	Pharyngeal swab	eThekwini
ZAF_1500	South Africa	EPI_ISL_660233	male	21	live	Pharyngeal swab	CS1
ZAF_1501	South Africa	EPI_ISL_509287	female	58	live	Pharyngeal swab	Umgungundlovu
ZAF_1503	South Africa	EPI_ISL_515726	female	52	live	Pharyngeal swab
ZAF_1504	South Africa	EPI_ISL_660178	female	63	live	Pharyngeal swab
ZAF_1505	South Africa	EPI_ISL_660185	male	67	live	Pharyngeal swab
ZAF_1506	South Africa	EPI_ISL_515749	female	46	live	Pharyngeal swab
ZAF_1507	South Africa	EPI_ISL_602642	female	55	live	Pharyngeal swab	ugu
ZAF_1508	South Africa	EPI_ISL_495546	female	28	live	Pharyngeal swab
ZAF_1509	South Africa	EPI_ISL_535536	male	30	live	Pharyngeal swab	uMkhanyakude
ZAF_151	South Africa	EPI_ISL_495534	female	68	live	Pharyngeal swab
ZAF_1510	South Africa	EPI_ISL_635053	female	9	live	Pharyngeal swab
ZAF_1511	South Africa	EPI_ISL_602679	female	25	live	Pharyngeal swab	Umkhanyakude
ZAF_1512	South Africa	EPI_ISL_602684	female	23	live	Pharyngeal swab	eThekwini
ZAF_1513	South Africa	EPI_ISL_660143	female	17	live	Pharyngeal swab
ZAF_1514	South Africa	EPI_ISL_515772	female	38	live	Pharyngeal swab
ZAF_1515	South Africa	EPI_ISL_515877	female	29	live	Pharyngeal swab
ZAF_1516	South Africa	EPI_ISL_509241	female	56	live	Pharyngeal swab	Ilembe
ZAF_1518	South Africa	EPI_ISL_602913	female	45	live	Pharyngeal swab	eThekwini
ZAF_152	South Africa	EPI_ISL_535544	female	46	live	Pharyngeal swab	King Cetshwayo
ZAF_1520	South Africa	EPI_ISL_635007	female	79	live	Pharyngeal swab
ZAF_1521	South Africa	EPI_ISL_487280	female	57	live	Pharyngeal swab	eThekwini
ZAF_1522	South Africa	EPI_ISL_498077	male	25	live	Pharyngeal swab
ZAF_1523	South Africa	EPI_ISL_660208	female	76	live	Pharyngeal swab
ZAF_1524	South Africa	EPI_ISL_509342	male	18	live	Pharyngeal swab	uThukela
ZAF_1525	South Africa	EPI_ISL_602715	male	13	live	Pharyngeal swab
ZAF_1526	South Africa	EPI_ISL_660608	female	22	live	Pharyngeal swab
ZAF_1527	South Africa	EPI_ISL_535461	male	30	live	Pharyngeal swab	Ugu
ZAF_1528	South Africa	EPI_ISL_602810	female	28	live	Pharyngeal swab	uMkhanyakude
ZAF_1529	South Africa	EPI_ISL_487311	female	22	live	Pharyngeal swab	uThukela
ZAF_153	South Africa	EPI_ISL_635021	female	27	live	Pharyngeal swab
ZAF_1530	South Africa	EPI_ISL_602882	female	55	live	Pharyngeal swab	Zululand
ZAF_1531	South Africa	EPI_ISL_602787	male	86	live	Pharyngeal swab	Harry Gwala
ZAF_1532	South Africa	EPI_ISL_529775	male	32	live	Pharyngeal swab
ZAF_1534	South Africa	EPI_ISL_515671	female	12	live	Pharyngeal swab
ZAF_1535	South Africa	EPI_ISL_535399	male	24	live	Pharyngeal swab	Ilembe
ZAF_1536	South Africa	EPI_ISL_515839	male	1	live	Pharyngeal swab
ZAF_1537	South Africa	EPI_ISL_509260	male	38	live	Pharyngeal swab	ugu
ZAF_1538	South Africa	EPI_ISL_602637	female	55	live	Pharyngeal swab	Ilembe
ZAF_1539	South Africa	EPI_ISL_495533	female	32	live	Pharyngeal swab
ZAF_154	South Africa	EPI_ISL_509267	female	59	live	Pharyngeal swab	uThukela
ZAF_1540	South Africa	EPI_ISL_660229	male	27	live	Pharyngeal swab	CS1
ZAF_1541	South Africa	EPI_ISL_535543	female	30	live	Pharyngeal swab	King Cetshwayo
ZAF_1542	South Africa	EPI_ISL_635026	female	49	live	Pharyngeal swab
ZAF_1543	South Africa	EPI_ISL_498056	male	32	live	Pharyngeal swab
ZAF_1544	South Africa	EPI_ISL_635049	female	51	live	Pharyngeal swab
ZAF_1545	South Africa	EPI_ISL_602658	male	9	live	Pharyngeal swab	Amajuba
ZAF_1547	South Africa	EPI_ISL_660246	female	65	live	Pharyngeal swab
ZAF_1548	South Africa	EPI_ISL_515856	female	45	live	Pharyngeal swab
ZAF_155	South Africa	EPI_ISL_515851	female	46	live	Pharyngeal swab
ZAF_1550	South Africa	EPI_ISL_515753	male	70	live	Pharyngeal swab
ZAF_1551	South Africa	EPI_ISL_660646	female	20	live	Pharyngeal swab
ZAF_1552	South Africa	EPI_ISL_515574	female	30	live	Pharyngeal swab	CH4
ZAF_1553	South Africa	EPI_ISL_515589	female	37	live	Pharyngeal swab
ZAF_1554	South Africa	EPI_ISL_487330	male	51	live	Pharyngeal swab	eThekwini
ZAF_1555	South Africa	EPI_ISL_529754	female	54	live	Pharyngeal swab
ZAF_1556	South Africa	EPI_ISL_515650	female	35	live	Pharyngeal swab
ZAF_1557	South Africa	EPI_ISL_509363	female	14	live	Pharyngeal swab	Ilembe
ZAF_1558	South Africa	EPI_ISL_634982	female	64	live	Pharyngeal swab
ZAF_1559	South Africa	EPI_ISL_535440	female	43	live	Pharyngeal swab	King Cetshwayo
ZAF_156	South Africa	EPI_ISL_660165	female	86	live	Pharyngeal swab
ZAF_1560	South Africa	EPI_ISL_602831	male	28	live	Pharyngeal swab	Amajuba
ZAF_1561	South Africa	EPI_ISL_602734	male	44	live	Pharyngeal swab	King Cetshwayo
ZAF_1562	South Africa	EPI_ISL_660629	female	37	live	Pharyngeal swab
ZAF_1563	South Africa	EPI_ISL_515578	female	35	live	Pharyngeal swab
ZAF_1565	South Africa	EPI_ISL_515585	female	40	live	Pharyngeal swab	CH4
ZAF_1566	South Africa	EPI_ISL_602852	male	26	live	Pharyngeal swab	eThekwini
ZAF_1567	South Africa	EPI_ISL_535423	female	50	live	Pharyngeal swab	Umgungundlovu
ZAF_1568	South Africa	EPI_ISL_529758	female	29	live	Pharyngeal swab
ZAF_1569	South Africa	EPI_ISL_605786	male	16	live	Pharyngeal swab	Ilembe
ZAF_157	South Africa	EPI_ISL_515754	female	48	live	Pharyngeal swab
ZAF_1570	South Africa	EPI_ISL_509300	female	30	live	Pharyngeal swab	Zululand
ZAF_1571	South Africa	EPI_ISL_529737	female	47	live	Pharyngeal swab
ZAF_1572	South Africa	EPI_ISL_515633	male	35	live	Pharyngeal swab
ZAF_1573	South Africa	EPI_ISL_660625	female	13	live	Pharyngeal swab
ZAF_1574	South Africa	EPI_ISL_602738	male	24	live	Pharyngeal swab	Zululand
ZAF_1575	South Africa	EPI_ISL_515730	female	41	live	Pharyngeal swab
ZAF_1576	South Africa	EPI_ISL_509291	female	33	live	Pharyngeal swab	Zululand
ZAF_1577	South Africa	EPI_ISL_515835	male	46	live	Pharyngeal swab
ZAF_1578	South Africa	EPI_ISL_535395	male	49	live	Pharyngeal swab	Harry Gwala
ZAF_1579	South Africa	EPI_ISL_660225	female	18	live	Pharyngeal swab	CE1
ZAF_158	South Africa	EPI_ISL_660198	female	77	live	Pharyngeal swab
ZAF_1580	South Africa	EPI_ISL_535520	male	53	live	Pharyngeal swab	Ilembe
ZAF_1581	South Africa	EPI_ISL_635045	female	29	live	Pharyngeal swab
ZAF_1582	South Africa	EPI_ISL_602654	male	29	live	Pharyngeal swab	uMkhanyakude
ZAF_1583	South Africa	EPI_ISL_495550	female	43	live	Pharyngeal swab
ZAF_1585	South Africa	EPI_ISL_660193	female	49	live	Pharyngeal swab
ZAF_1586	South Africa	EPI_ISL_515612	female	65	live	Pharyngeal swab
ZAF_1587	South Africa	EPI_ISL_602719	female	34	live	Pharyngeal swab	Umzinyathi
ZAF_1588	South Africa	EPI_ISL_518053	female	43	live	Pharyngeal swab
ZAF_1589	South Africa	EPI_ISL_602873	female	8	live	Pharyngeal swab	Umkhanyakude
ZAF_159	South Africa	EPI_ISL_482712	female	44	live	Pharyngeal swab
ZAF_1590	South Africa	EPI_ISL_535402	female	44	live	Pharyngeal swab	Amajuba
ZAF_1591	South Africa	EPI_ISL_498117	female	54	live	Pharyngeal swab
ZAF_1592	South Africa	EPI_ISL_602776	male	34	live	Pharyngeal swab	eThekwini
ZAF_1593	South Africa	EPI_ISL_509321	female	33	live	Pharyngeal swab	Zululand
ZAF_1594	South Africa	EPI_ISL_515680	female	69	live	Pharyngeal swab
ZAF_1595	South Africa	EPI_ISL_529779	female	69	live	Pharyngeal swab
ZAF_1597	South Africa	EPI_ISL_602675	male	25	live	Pharyngeal swab
ZAF_1598	South Africa	EPI_ISL_602688	female	11	live	Pharyngeal swab	eThekwini
ZAF_1599	South Africa	EPI_ISL_535501	female	36	live	Pharyngeal swab	ugu
ZAF_16	South Africa	EPI_ISL_660234	female	42	live	Pharyngeal swab
ZAF_160	South Africa	EPI_ISL_660241	female	45	live	Pharyngeal swab
ZAF_1600	South Africa	EPI_ISL_515783	male	18	live	Pharyngeal swab
ZAF_1601	South Africa	EPI_ISL_515886	male	39	live	Pharyngeal swab
ZAF_1602	South Africa	EPI_ISL_515814	female	36	live	Pharyngeal swab
ZAF_1603	South Africa	EPI_ISL_515711	female	36	live	Pharyngeal swab
ZAF_1604	South Africa	EPI_ISL_498086	female	32	live	Pharyngeal swab
ZAF_1606	South Africa	EPI_ISL_660204	female	43	live	Pharyngeal swab
ZAF_161	South Africa	EPI_ISL_529753	male	33	live	Pharyngeal swab
ZAF_162	South Africa	EPI_ISL_436687	female	55	live	unknown
ZAF_163	South Africa	EPI_ISL_515657	female	41	live	Pharyngeal swab
ZAF_164	South Africa	EPI_ISL_515573	female	45	live	Pharyngeal swab
ZAF_165	South Africa	EPI_ISL_660641	male	73	live	Pharyngeal swab
ZAF_166	South Africa	EPI_ISL_535428	male	45	live	Pharyngeal swab	Zululand
ZAF_167	South Africa	EPI_ISL_602859	female	81	live	Pharyngeal swab	sisonke
ZAF_168	South Africa	EPI_ISL_487337	female	42	live	Pharyngeal swab	eThekwini
ZAF_169	South Africa	EPI_ISL_535447	female	23	live	Pharyngeal swab	Ilembe
ZAF_17	South Africa	EPI_ISL_602645	male	36	live	Pharyngeal swab	Ugu
ZAF_170	South Africa	EPI_ISL_602836	male	8	live	Pharyngeal swab	eThekwini
ZAF_171	South Africa	EPI_ISL_602733	female	27	live	Pharyngeal swab	King Cetshwayo
ZAF_172	South Africa	EPI_ISL_634978	female	39	live	Pharyngeal swab
ZAF_173	South Africa	EPI_ISL_509364	female	37	live	Pharyngeal swab	Ilembe
ZAF_174	South Africa	EPI_ISL_634985	male	11	live	Pharyngeal swab
ZAF_175	South Africa	EPI_ISL_515638	male	11	live	Pharyngeal swab
ZAF_176	South Africa	EPI_ISL_660144	female	18	live	Pharyngeal swab	CC2
ZAF_177	South Africa	EPI_ISL_515788	female	27	live	Pharyngeal swab
ZAF_178	South Africa	EPI_ISL_515775	female	36	live	Pharyngeal swab
ZAF_179	South Africa	EPI_ISL_515870	female	17	live	Pharyngeal swab
ZAF_18	South Africa	EPI_ISL_482708	male	37	live	Pharyngeal swab
ZAF_180	South Africa	EPI_ISL_509229	female	36	live	Pharyngeal swab	Umzinyathi
ZAF_181	South Africa	EPI_ISL_602683	male	48	live	Pharyngeal swab	eThekwini
ZAF_182	South Africa	EPI_ISL_660260	female	19	live	Pharyngeal swab
ZAF_183	South Africa	EPI_ISL_602914	male	81	live	Pharyngeal swab	Umkhanyakude
ZAF_185	South Africa	EPI_ISL_635000	female	91	live	Pharyngeal swab
ZAF_186	South Africa	EPI_ISL_482859	female	28	live	Pharyngeal swab
ZAF_187	South Africa	EPI_ISL_487287	male	13	live	Pharyngeal swab
ZAF_188	South Africa	EPI_ISL_498070	male	66	live	Pharyngeal swab
ZAF_189	South Africa	EPI_ISL_509246	female	29	live	Pharyngeal swab	Ilembe
ZAF_19	South Africa	EPI_ISL_495541	female	32	live	Pharyngeal swab
ZAF_190	South Africa	EPI_ISL_602712	female	13	live	Pharyngeal swab
ZAF_191	South Africa	EPI_ISL_535466	female	33	live	Pharyngeal swab	Ilembe
ZAF_192	South Africa	EPI_ISL_602817	female	53	live	Pharyngeal swab	Umgungundlovu
ZAF_193	South Africa	EPI_ISL_515619	male	57	live	Pharyngeal swab
ZAF_194	South Africa	EPI_ISL_509345	female	29	live	Pharyngeal swab	uThukela
ZAF_195	South Africa	EPI_ISL_529772	female	55	live	Pharyngeal swab
ZAF_196	South Africa	EPI_ISL_515676	female	23	live	Pharyngeal swab
ZAF_197	South Africa	EPI_ISL_535409	male	28	live	Pharyngeal swab	Amajuba
ZAF_198	South Africa	EPI_ISL_518037	female	50	live	Pharyngeal swab
ZAF_199	South Africa	EPI_ISL_487316	female	52	live	Pharyngeal swab	eThekwini
ZAF_2	South Africa	EPI_ISL_602843	female	52	live	Pharyngeal swab	uMkhanyakude
ZAF_20	South Africa	EPI_ISL_535531	female	49	live	Pharyngeal swab	King Cetshwayo
ZAF_200	South Africa	EPI_ISL_602878	female	57	live	Pharyngeal swab	Zululand
ZAF_201	South Africa	EPI_ISL_602885	female	34	live	Pharyngeal swab	Ilembe
ZAF_202	South Africa	EPI_ISL_660660	male	11	live	Pharyngeal swab
ZAF_203	South Africa	EPI_ISL_602780	male	39	live	Pharyngeal swab	ugu
ZAF_204	South Africa	EPI_ISL_660235	female	32	live	Pharyngeal swab
ZAF_205	South Africa	EPI_ISL_482863	female	29	live	Pharyngeal swab
ZAF_206	South Africa	EPI_ISL_515720	female	18	live	Pharyngeal swab
ZAF_207	South Africa	EPI_ISL_515825	male	55	live	Pharyngeal swab
ZAF_208	South Africa	EPI_ISL_509281	female	77	live	Pharyngeal swab	uThukela
ZAF_209	South Africa	EPI_ISL_660183	female	55	live	Pharyngeal swab
ZAF_21	South Africa	EPI_ISL_635054	female	53	live	Pharyngeal swab
ZAF_210	South Africa	EPI_ISL_635055	male	24	live	Pharyngeal swab
ZAF_211	South Africa	EPI_ISL_535530	female	39	live	Pharyngeal swab	King Cetshwayo
ZAF_212	South Africa	EPI_ISL_482709	male	30	live	Pharyngeal swab
ZAF_213	South Africa	EPI_ISL_495540	female	38	live	Pharyngeal swab
ZAF_214	South Africa	EPI_ISL_602644	female	55	live	Pharyngeal swab	ugu
ZAF_215	South Africa	EPI_ISL_529748	male	31	live	Pharyngeal swab
ZAF_216	South Africa	EPI_ISL_509310	female	34	live	Pharyngeal swab	Amajuba
ZAF_217	South Africa	EPI_ISL_515595	female	42	live	Pharyngeal swab
ZAF_218	South Africa	EPI_ISL_602747	female	41	live	Pharyngeal swab	uMkhanyakude
ZAF_219	South Africa	EPI_ISL_515568	female	28	live	Pharyngeal swab
ZAF_22	South Africa	EPI_ISL_660182	female	67	live	Pharyngeal swab
ZAF_220	South Africa	EPI_ISL_498126	male	29	live	Pharyngeal swab
ZAF_221	South Africa	EPI_ISL_535433	female	95	live	Pharyngeal swab	King Cetshwayo
ZAF_222	South Africa	EPI_ISL_602842	female	40	live	Pharyngeal swab	Amajuba
ZAF_223	South Africa	EPI_ISL_602728	male	38	live	Pharyngeal swab	Ilembe
ZAF_224	South Africa	EPI_ISL_660635	female	21	live	Pharyngeal swab
ZAF_225	South Africa	EPI_ISL_515623	female	29	live	Pharyngeal swab
ZAF_226	South Africa	EPI_ISL_529727	female	34	live	Pharyngeal swab
ZAF_227	South Africa	EPI_ISL_515793	female	25	live	Pharyngeal swab
ZAF_229	South Africa	EPI_ISL_482728	male	37	live	Pharyngeal swab
ZAF_23	South Africa	EPI_ISL_529802	female	40	live	Pharyngeal swab
ZAF_230	South Africa	EPI_ISL_602698	male	17	live	Pharyngeal swab	eThekwini
ZAF_231	South Africa	EPI_ISL_495561	female	13	live	Pharyngeal swab
ZAF_232	South Africa	EPI_ISL_602665	male	63	live	Pharyngeal swab	sisonke
ZAF_233	South Africa	EPI_ISL_535511	female	13	live	Pharyngeal swab
ZAF_234	South Africa	EPI_ISL_498096	female	38	live	Pharyngeal swab
ZAF_235	South Africa	EPI_ISL_660214	female	35	live	Pharyngeal swab
ZAF_237	South Africa	EPI_ISL_515701	female	72	live	Pharyngeal swab
ZAF_238	South Africa	EPI_ISL_660130	female	49	live	Pharyngeal swab
ZAF_239	South Africa	EPI_ISL_602709	female	25	live	Pharyngeal swab	eThekwini
ZAF_24	South Africa	EPI_ISL_515603	female	44	live	Pharyngeal swab
ZAF_240	South Africa	EPI_ISL_660614	female	20	live	Pharyngeal swab
ZAF_241	South Africa	EPI_ISL_535480	female	34	live	Pharyngeal swab	Ilembe
ZAF_242	South Africa	EPI_ISL_518043	female	54	live	Pharyngeal swab
ZAF_243	South Africa	EPI_ISL_515602	female	32	live	Pharyngeal swab
ZAF_244	South Africa	EPI_ISL_529803	female	31	live	Pharyngeal swab
ZAF_245	South Africa	EPI_ISL_509331	female	60	live	Pharyngeal swab	Umzinyathi
ZAF_246	South Africa	EPI_ISL_529794	male	17	live	Pharyngeal swab
ZAF_247	South Africa	EPI_ISL_529769	male	68	live	Pharyngeal swab
ZAF_248	South Africa	EPI_ISL_515690	female	90	live	Pharyngeal swab
ZAF_249	South Africa	EPI_ISL_498107	male	58	live	Pharyngeal swab
ZAF_25	South Africa	EPI_ISL_518042	female	52	live	Pharyngeal swab
ZAF_250	South Africa	EPI_ISL_535412	male	58	live	Pharyngeal swab	Umgungundlovu
ZAF_251	South Africa	EPI_ISL_602863	male	54	live	Pharyngeal swab	uMkhanyakude
ZAF_252	South Africa	EPI_ISL_602766	male	40	live	Pharyngeal swab	Ilembe
ZAF_253	South Africa	EPI_ISL_660618	male	30	live	Pharyngeal swab
ZAF_254	South Africa	EPI_ISL_602705	male	82	live	Pharyngeal swab	eThekwini
ZAF_255	South Africa	EPI_ISL_602800	female	40	live	Pharyngeal swab	uMkhanyakude
ZAF_256	South Africa	EPI_ISL_535471	male	51	live	Pharyngeal swab	Ilembe
ZAF_257	South Africa	EPI_ISL_509352	female	27	live	Pharyngeal swab	uThukela
ZAF_258	South Africa	EPI_ISL_515661	female	21	live	Pharyngeal swab
ZAF_259	South Africa	EPI_ISL_529798	male	42	live	Pharyngeal swab
ZAF_26	South Africa	EPI_ISL_535481	female	58	live	Pharyngeal swab	ugu
ZAF_260	South Africa	EPI_ISL_529765	female	30	live	Pharyngeal swab
ZAF_261	South Africa	EPI_ISL_602892	female	27	live	Pharyngeal swab	Harry Gwala
ZAF_262	South Africa	EPI_ISL_487301	female	40	live	Pharyngeal swab	Zululand
ZAF_263	South Africa	EPI_ISL_602797	female	19	live	Pharyngeal swab
ZAF_264	South Africa	EPI_ISL_515762	male	69	live	Pharyngeal swab
ZAF_265	South Africa	EPI_ISL_660153	female	63	live	Pharyngeal swab
ZAF_266	South Africa	EPI_ISL_515867	female	63	live	Pharyngeal swab
ZAF_267	South Africa	EPI_ISL_482724	female	38	live	Pharyngeal swab
ZAF_268	South Africa	EPI_ISL_602694	female	54	live	Pharyngeal swab	eThekwini
ZAF_269	South Africa	EPI_ISL_602669	male	30	live	Pharyngeal swab	sisonke
ZAF_27	South Africa	EPI_ISL_602708	female	33	live	Pharyngeal swab	eThekwini
ZAF_270	South Africa	EPI_ISL_498067	male	28	live	Pharyngeal swab
ZAF_271	South Africa	EPI_ISL_487290	female	47	live	Pharyngeal swab	Umgungundlovu
ZAF_272	South Africa	EPI_ISL_635017	female	30	live	Pharyngeal swab
ZAF_274	South Africa	EPI_ISL_602903	female	20	live	Pharyngeal swab	Umkhanyakude
ZAF_275	South Africa	EPI_ISL_660218	female	25	live	Pharyngeal swab
ZAF_276	South Africa	EPI_ISL_515808	female	67	live	Pharyngeal swab
ZAF_277	South Africa	EPI_ISL_509251	female	36	live	Pharyngeal swab	uThukela
ZAF_278	South Africa	EPI_ISL_515640	male	38	live	Pharyngeal swab
ZAF_279	South Africa	EPI_ISL_529744	male	8	live	Pharyngeal swab
ZAF_28	South Africa	EPI_ISL_660615	male	80	live	Pharyngeal swab
ZAF_281	South Africa	EPI_ISL_660656	female	36	live	Pharyngeal swab
ZAF_282	South Africa	EPI_ISL_487320	male	44	live	Pharyngeal swab	eThekwini
ZAF_283	South Africa	EPI_ISL_602821	male	49	live	Pharyngeal swab	Zululand
ZAF_284	South Africa	EPI_ISL_535450	female	40	live	Pharyngeal swab	Ilembe
ZAF_285	South Africa	EPI_ISL_660639	female	35	live	Pharyngeal swab
ZAF_286	South Africa	EPI_ISL_602724	male	57	live	Pharyngeal swab	uMkhanyakude
ZAF_287	South Africa	EPI_ISL_634992	male	39	live	Pharyngeal swab
ZAF_288	South Africa	EPI_ISL_660239	female	55	live	Pharyngeal swab
ZAF_289	South Africa	EPI_ISL_495523	female	37	live	Pharyngeal swab
ZAF_29	South Africa	EPI_ISL_602767	male	28	live	Pharyngeal swab	eThekwini
ZAF_290	South Africa	EPI_ISL_602627	female	51	live	Pharyngeal swab	eThekwini
ZAF_291	South Africa	EPI_ISL_635036	female	7	live	Pharyngeal swab
ZAF_293	South Africa	EPI_ISL_602922	male	25	live	Pharyngeal swab	eThekwini
ZAF_294	South Africa	EPI_ISL_509270	male	36	live	Pharyngeal swab	uThukela
ZAF_295	South Africa	EPI_ISL_515829	female	42	live	Pharyngeal swab
ZAF_296	South Africa	EPI_ISL_515846	female	33	live	Pharyngeal swab
ZAF_297	South Africa	EPI_ISL_515743	male	40	live	Pharyngeal swab
ZAF_298	South Africa	EPI_ISL_660172	female	38	live	Pharyngeal swab
ZAF_299	South Africa	EPI_ISL_660256	male	21	live	Pharyngeal swab	CS1
ZAF_3	South Africa	EPI_ISL_602746	female	58	live	Pharyngeal swab	Umzinyathi
ZAF_30	South Africa	EPI_ISL_535413	female	54	live	Pharyngeal swab	Zululand
ZAF_300	South Africa	EPI_ISL_482705	male	49	live	Pharyngeal swab
ZAF_301	South Africa	EPI_ISL_602648	male	69	live	Pharyngeal swab	Umkhanyakude
ZAF_302	South Africa	EPI_ISL_535507	male	31	live	Pharyngeal swab	Ilembe
ZAF_303	South Africa	EPI_ISL_602673	female	67	live	Pharyngeal swab	Zululand
ZAF_304	South Africa	EPI_ISL_509224	female	24	live	Pharyngeal swab	Umgungundlovu
ZAF_305	South Africa	EPI_ISL_515880	female	43	live	Pharyngeal swab
ZAF_306	South Africa	EPI_ISL_515778	female	26	live	Pharyngeal swab
ZAF_307	South Africa	EPI_ISL_660149	female	19	live	Pharyngeal swab	CC2
ZAF_308	South Africa	EPI_ISL_515785	female	37	live	Pharyngeal swab
ZAF_309	South Africa	EPI_ISL_515717	female	47	live	Pharyngeal swab
ZAF_31	South Africa	EPI_ISL_602862	female	28	live	Pharyngeal swab	Ilembe
ZAF_310	South Africa	EPI_ISL_660126	male	19	live	Pharyngeal swab	CC2
ZAF_312	South Africa	EPI_ISL_495518	female	50	live	Pharyngeal swab
ZAF_313	South Africa	EPI_ISL_660202	female	18	live	Pharyngeal swab
ZAF_314	South Africa	EPI_ISL_482854	female	17	live	Pharyngeal swab
ZAF_316	South Africa	EPI_ISL_602919	female	51	live	Pharyngeal swab	King Cetshwayo
ZAF_317	South Africa	EPI_ISL_498080	male	50	live	Pharyngeal swab
ZAF_318	South Africa	EPI_ISL_487277	female	62	live	Pharyngeal swab	eThekwini
ZAF_319	South Africa	EPI_ISL_509348	female	49	live	Pharyngeal swab	Zululand
ZAF_32	South Africa	EPI_ISL_498106	female	24	live	Pharyngeal swab
ZAF_320	South Africa	EPI_ISL_515614	female	46	live	Pharyngeal swab
ZAF_321	South Africa	EPI_ISL_535496	male	52	live	Pharyngeal swab	Ugu
ZAF_322	South Africa	EPI_ISL_602770	male	38	live	Pharyngeal swab	Zululand
ZAF_323	South Africa	EPI_ISL_498111	female	24	live	Pharyngeal swab
ZAF_324	South Africa	EPI_ISL_602888	female	37	live	Pharyngeal swab	eThekwini
ZAF_325	South Africa	EPI_ISL_602875	female	35	live	Pharyngeal swab	ugu
ZAF_326	South Africa	EPI_ISL_535404	female	42	live	Pharyngeal swab	uThukela
ZAF_327	South Africa	EPI_ISL_529782	female	30	live	Pharyngeal swab
ZAF_328	South Africa	EPI_ISL_515686	female	63	live	Pharyngeal swab
ZAF_329	South Africa	EPI_ISL_509327	female	23	live	Pharyngeal swab	Amajuba
ZAF_33	South Africa	EPI_ISL_515691	female	83	live	Pharyngeal swab
ZAF_330	South Africa	EPI_ISL_515833	female	55	live	Pharyngeal swab
ZAF_331	South Africa	EPI_ISL_535393	female	68	live	Pharyngeal swab	Amajuba
ZAF_332	South Africa	EPI_ISL_509297	female	25	live	Pharyngeal swab	Zululand
ZAF_333	South Africa	EPI_ISL_515736	female	38	live	Pharyngeal swab
ZAF_334	South Africa	EPI_ISL_535549	female	14	live	Pharyngeal swab	Ilembe
ZAF_335	South Africa	EPI_ISL_660223	male	18	live	Pharyngeal swab	CE1
ZAF_336	South Africa	EPI_ISL_495539	male	31	live	Pharyngeal swab
ZAF_337	South Africa	EPI_ISL_495556	male	57	live	Pharyngeal swab
ZAF_338	South Africa	EPI_ISL_602652	male	11	live	Pharyngeal swab	uThukela
ZAF_339	South Africa	EPI_ISL_635043	female	50	live	Pharyngeal swab
ZAF_34	South Africa	EPI_ISL_529768	male	38	live	Pharyngeal swab
ZAF_340	South Africa	EPI_ISL_535526	female	37	live	Pharyngeal swab	Ilembe
ZAF_341	South Africa	EPI_ISL_515759	male	36	live	Pharyngeal swab
ZAF_342	South Africa	EPI_ISL_660195	male	63	live	Pharyngeal swab
ZAF_343	South Africa	EPI_ISL_660168	male	55	live	Pharyngeal swab
ZAF_344	South Africa	EPI_ISL_602854	female	34	live	Pharyngeal swab	Ugu
ZAF_345	South Africa	EPI_ISL_535425	female	23	live	Pharyngeal swab	Umgungundlovu
ZAF_346	South Africa	EPI_ISL_515583	female	40	live	Pharyngeal swab
ZAF_347	South Africa	EPI_ISL_602751	male	22	live	Pharyngeal swab	King Cetshwayo
ZAF_348	South Africa	EPI_ISL_509306	female	34	live	Pharyngeal swab	eThekwini
ZAF_349	South Africa	EPI_ISL_515635	male	37	live	Pharyngeal swab
ZAF_35	South Africa	EPI_ISL_529795	female	34	live	Pharyngeal swab
ZAF_350	South Africa	EPI_ISL_529731	male	27	live	Pharyngeal swab
ZAF_351	South Africa	EPI_ISL_634988	male	84	live	Pharyngeal swab
ZAF_352	South Africa	EPI_ISL_509369	female	28	live	Pharyngeal swab	Ilembe
ZAF_353	South Africa	EPI_ISL_660623	female	37	live	Pharyngeal swab
ZAF_354	South Africa	EPI_ISL_535429	male	32	live	Pharyngeal swab	King Cetshwayo
ZAF_355	South Africa	EPI_ISL_487336	male	32	live	Pharyngeal swab	eThekwini
ZAF_356	South Africa	EPI_ISL_602858	female	45	live	Pharyngeal swab	sisonke
ZAF_357	South Africa	EPI_ISL_660640	female	13	live	Pharyngeal swab
ZAF_358	South Africa	EPI_ISL_515572	female	21	live	Pharyngeal swab	CH4
ZAF_359	South Africa	EPI_ISL_515656	female	38	live	Pharyngeal swab
ZAF_360	South Africa	EPI_ISL_529752	female	36	live	Pharyngeal swab
ZAF_361	South Africa	EPI_ISL_436686	female	39	live	Pharyngeal swab
ZAF_362	South Africa	EPI_ISL_515639	female	39	live	Pharyngeal swab
ZAF_363	South Africa	EPI_ISL_509365	female	44	live	Pharyngeal swab	Ilembe
ZAF_364	South Africa	EPI_ISL_634984	female	25	live	Pharyngeal swab
ZAF_365	South Africa	EPI_ISL_634979	female	45	live	Pharyngeal swab
ZAF_366	South Africa	EPI_ISL_602732	female	54	live	Pharyngeal swab	uMkhanyakude
ZAF_367	South Africa	EPI_ISL_535446	female	37	live	Pharyngeal swab	Ilembe
ZAF_368	South Africa	EPI_ISL_602837	female	8	live	Pharyngeal swab	Harry Gwala
ZAF_369	South Africa	EPI_ISL_509266	male	23	live	Pharyngeal swab	uThukela
ZAF_37	South Africa	EPI_ISL_535510	male	12	live	Pharyngeal swab	Ilembe
ZAF_370	South Africa	EPI_ISL_635020	female	1	live	Pharyngeal swab
ZAF_371	South Africa	EPI_ISL_535545	female	38	live	Pharyngeal swab	uMkhanyakude
ZAF_372	South Africa	EPI_ISL_495535	male	26	live	Pharyngeal swab
ZAF_373	South Africa	EPI_ISL_602631	female	46	live	Pharyngeal swab	eThekwini
ZAF_374	South Africa	EPI_ISL_482713	female	47	live	Pharyngeal swab	KE26, CH3
ZAF_375	South Africa	EPI_ISL_660240	female	42	live	Pharyngeal swab
ZAF_376	South Africa	EPI_ISL_660199	male	55	live	Pharyngeal swab
ZAF_377	South Africa	EPI_ISL_515755	male	78	live	Pharyngeal swab
ZAF_379	South Africa	EPI_ISL_515850	female	61	live	Pharyngeal swab
ZAF_38	South Africa	EPI_ISL_602664	female	44	live	Pharyngeal swab	eThekwini
ZAF_380	South Africa	EPI_ISL_509344	female	33	live	Pharyngeal swab	uThukela
ZAF_381	South Africa	EPI_ISL_515618	female	39	live	Pharyngeal swab
ZAF_382	South Africa	EPI_ISL_535467	female	35	live	Pharyngeal swab	Ilembe
ZAF_383	South Africa	EPI_ISL_602816	male	42	live	Pharyngeal swab	uMkhanyakude
ZAF_384	South Africa	EPI_ISL_602713	male	51	live	Pharyngeal swab	eThekwini
ZAF_385	South Africa	EPI_ISL_602781	male	30	live	Pharyngeal swab	Ilembe
ZAF_386	South Africa	EPI_ISL_660661	female	50	live	Pharyngeal swab
ZAF_387	South Africa	EPI_ISL_602884	male	56	live	Pharyngeal swab	Harry Gwala
ZAF_388	South Africa	EPI_ISL_535408	female	26	live	Pharyngeal swab	Zululand
ZAF_39	South Africa	EPI_ISL_602699	female	23	live	Pharyngeal swab	eThekwini
ZAF_390	South Africa	EPI_ISL_487317	female	60	live	Pharyngeal swab	Amajuba
ZAF_391	South Africa	EPI_ISL_518036	female	44	live	Pharyngeal swab
ZAF_392	South Africa	EPI_ISL_515677	female	68	live	Pharyngeal swab
ZAF_393	South Africa	EPI_ISL_529773	female	39	live	Pharyngeal swab
ZAF_394	South Africa	EPI_ISL_602682	male	29	live	Pharyngeal swab	eThekwini
ZAF_395	South Africa	EPI_ISL_660261	female	61	live	Pharyngeal swab
ZAF_396	South Africa	EPI_ISL_509228	male	54	live	Pharyngeal swab	uThukela
ZAF_397	South Africa	EPI_ISL_515871	female	32	live	Pharyngeal swab
ZAF_398	South Africa	EPI_ISL_515774	female	23	live	Pharyngeal swab
ZAF_399	South Africa	EPI_ISL_515789	male	47	live	Pharyngeal swab
ZAF_4	South Africa	EPI_ISL_515569	female	24	live	Pharyngeal swab	CH4
ZAF_40	South Africa	EPI_ISL_482729	female	47	live	Pharyngeal swab
ZAF_400	South Africa	EPI_ISL_660145	female	18	live	Pharyngeal swab	CC2
ZAF_402	South Africa	EPI_ISL_635001	female	47	live	Pharyngeal swab
ZAF_403	South Africa	EPI_ISL_498071	female	18	live	Pharyngeal swab
ZAF_404	South Africa	EPI_ISL_487286	female	42	live	Pharyngeal swab	eThekwini
ZAF_405	South Africa	EPI_ISL_482858	female	21	live	Pharyngeal swab
ZAF_406	South Africa	EPI_ISL_602915	female	80	live	Pharyngeal swab	Ilembe
ZAF_408	South Africa	EPI_ISL_509332	female	84	live	Pharyngeal swab	Ugu
ZAF_409	South Africa	EPI_ISL_515693	male	67	live	Pharyngeal swab
ZAF_41	South Africa	EPI_ISL_495560	male	53	live	Pharyngeal swab
ZAF_410	South Africa	EPI_ISL_529797	male	7	live	Pharyngeal swab
ZAF_411	South Africa	EPI_ISL_602860	male	43	live	Pharyngeal swab	eThekwini
ZAF_412	South Africa	EPI_ISL_535411	male	43	live	Pharyngeal swab	Zululand
ZAF_413	South Africa	EPI_ISL_498104	female	36	live	Pharyngeal swab
ZAF_414	South Africa	EPI_ISL_602765	male	45	live	Pharyngeal swab	Harry Gwala
ZAF_415	South Africa	EPI_ISL_602798	male	49	live	Pharyngeal swab	ugu
ZAF_416	South Africa	EPI_ISL_660617	female	34	live	Pharyngeal swab
ZAF_417	South Africa	EPI_ISL_518040	female	47	live	Pharyngeal swab
ZAF_418	South Africa	EPI_ISL_535483	female	3	live	Pharyngeal swab
ZAF_419	South Africa	EPI_ISL_515601	female	40	live	Pharyngeal swab
ZAF_42	South Africa	EPI_ISL_509233	female	52	live	Pharyngeal swab	uThukela
ZAF_420	South Africa	EPI_ISL_529800	female	54	live	Pharyngeal swab
ZAF_421	South Africa	EPI_ISL_498095	female	62	live	Pharyngeal swab
ZAF_422	South Africa	EPI_ISL_498068	female	15	live	Pharyngeal swab
ZAF_423	South Africa	EPI_ISL_635018	male	38	live	Pharyngeal swab
ZAF_424	South Africa	EPI_ISL_660217	female	87	live	Pharyngeal swab
ZAF_426	South Africa	EPI_ISL_660133	male	18	live	Pharyngeal swab	CC2
ZAF_427	South Africa	EPI_ISL_515702	male	61	live	Pharyngeal swab
ZAF_428	South Africa	EPI_ISL_515790	female	14	live	Pharyngeal swab
ZAF_429	South Africa	EPI_ISL_509231	female	73	live	Pharyngeal swab	Ilembe
ZAF_43	South Africa	EPI_ISL_515792	male	50	live	Pharyngeal swab
ZAF_430	South Africa	EPI_ISL_515868	female	18	live	Pharyngeal swab
ZAF_431	South Africa	EPI_ISL_602666	female	54	live	Pharyngeal swab	Zululand
ZAF_432	South Africa	EPI_ISL_495562	female	12	live	Pharyngeal swab
ZAF_434	South Africa	EPI_ISL_487340	male	26	live	Pharyngeal swab	eThekwini
ZAF_435	South Africa	EPI_ISL_660636	female	37	live	Pharyngeal swab
ZAF_436	South Africa	EPI_ISL_529724	female	38	live	Pharyngeal swab
ZAF_437	South Africa	EPI_ISL_515620	male	49	live	Pharyngeal swab
ZAF_438	South Africa	EPI_ISL_509313	female	27	live	Pharyngeal swab
ZAF_439	South Africa	EPI_ISL_660659	female	64	live	Pharyngeal swab
ZAF_44	South Africa	EPI_ISL_660131	male	11	live	Pharyngeal swab
ZAF_440	South Africa	EPI_ISL_602744	female	43	live	Pharyngeal swab	Umzinyathi
ZAF_441	South Africa	EPI_ISL_515596	female	50	live	Pharyngeal swab
ZAF_442	South Africa	EPI_ISL_602841	male	25	live	Pharyngeal swab
ZAF_443	South Africa	EPI_ISL_535430	female	44	live	Pharyngeal swab	King Cetshwayo
ZAF_444	South Africa	EPI_ISL_498125	female	47	live	Pharyngeal swab
ZAF_445	South Africa	EPI_ISL_515849	female	26	live	Pharyngeal swab
ZAF_446	South Africa	EPI_ISL_660180	male	50	live	Pharyngeal swab
ZAF_447	South Africa	EPI_ISL_535533	female	54	live	Pharyngeal swab	Ilembe
ZAF_448	South Africa	EPI_ISL_635056	male	31	live	Pharyngeal swab
ZAF_449	South Africa	EPI_ISL_602647	male	69	live	Pharyngeal swab	Ilembe
ZAF_45	South Africa	EPI_ISL_515700	female	25	live	Pharyngeal swab
ZAF_450	South Africa	EPI_ISL_495543	female	46	live	Pharyngeal swab
ZAF_451	South Africa	EPI_ISL_660259	female	51	live	Pharyngeal swab
ZAF_452	South Africa	EPI_ISL_602628	female	50	live	Pharyngeal swab	eThekwini
ZAF_453	South Africa	EPI_ISL_660236	male	50	live	Pharyngeal swab
ZAF_454	South Africa	EPI_ISL_482860	female	10	live	Pharyngeal swab
ZAF_455	South Africa	EPI_ISL_635039	female	23	live	Pharyngeal swab
ZAF_456	South Africa	EPI_ISL_515723	female	27	live	Pharyngeal swab
ZAF_457	South Africa	EPI_ISL_435058	male	38	live	Pharyngeal swab
ZAF_458	South Africa	EPI_ISL_509282	female	15	live	Pharyngeal swab	uThukela
ZAF_459	South Africa	EPI_ISL_515826	female	23	live	Pharyngeal swab
ZAF_460	South Africa	EPI_ISL_515845	male	46	live	Pharyngeal swab
ZAF_461	South Africa	EPI_ISL_660171	female	28	live	Pharyngeal swab
ZAF_462	South Africa	EPI_ISL_515740	male	44	live	Pharyngeal swab
ZAF_463	South Africa	EPI_ISL_482706	female	69	live	Pharyngeal swab
ZAF_464	South Africa	EPI_ISL_660255	female	36	live	Pharyngeal swab
ZAF_465	South Africa	EPI_ISL_602624	female	84	live	Pharyngeal swab	eThekwini
ZAF_466	South Africa	EPI_ISL_495520	female	42	live	Pharyngeal swab
ZAF_467	South Africa	EPI_ISL_602921	female	52	live	Pharyngeal swab	uMkhanyakude
ZAF_468	South Africa	EPI_ISL_535550	female	27	live	Pharyngeal swab	King Cetshwayo
ZAF_469	South Africa	EPI_ISL_635035	female	36	live	Pharyngeal swab
ZAF_47	South Africa	EPI_ISL_660215	female	92	live	Pharyngeal swab
ZAF_470	South Africa	EPI_ISL_509273	male	25	live	Pharyngeal swab	uThukela
ZAF_471	South Africa	EPI_ISL_535453	female	23	live	Pharyngeal swab
ZAF_472	South Africa	EPI_ISL_602822	female	29	live	Pharyngeal swab	Zululand
ZAF_473	South Africa	EPI_ISL_602727	female	16	live	Pharyngeal swab	Umkhanyakude
ZAF_474	South Africa	EPI_ISL_509370	female	41	live	Pharyngeal swab	Ilembe
ZAF_475	South Africa	EPI_ISL_634991	female	27	live	Pharyngeal swab
ZAF_476	South Africa	EPI_ISL_529728	male	34	live	Pharyngeal swab
ZAF_477	South Africa	EPI_ISL_529747	female	49	live	Pharyngeal swab
ZAF_478	South Africa	EPI_ISL_515643	male	40	live	Pharyngeal swab
ZAF_479	South Africa	EPI_ISL_602748	female	69	live	Pharyngeal swab	Zululand
ZAF_48	South Africa	EPI_ISL_498097	female	40	live	Pharyngeal swab
ZAF_480	South Africa	EPI_ISL_660655	female	19	live	Pharyngeal swab
ZAF_481	South Africa	EPI_ISL_487323	male	26	live	Pharyngeal swab	eThekwini
ZAF_482	South Africa	EPI_ISL_602900	female	41	live	Pharyngeal swab	King Cetshwayo
ZAF_483	South Africa	EPI_ISL_498099	female	53	live	Pharyngeal swab
ZAF_485	South Africa	EPI_ISL_635014	female	31	live	Pharyngeal swab
ZAF_486	South Africa	EPI_ISL_498064	male	34	live	Pharyngeal swab
ZAF_487	South Africa	EPI_ISL_487293	female	38	live	Pharyngeal swab	Zululand
ZAF_488	South Africa	EPI_ISL_509252	female	21	live	Pharyngeal swab	Ilembe
ZAF_489	South Africa	EPI_ISL_660150	female	19	live	Pharyngeal swab	CC2
ZAF_49	South Africa	EPI_ISL_602668	female	36	live	Pharyngeal swab	uMkhanyakude
ZAF_490	South Africa	EPI_ISL_515761	female	44	live	Pharyngeal swab
ZAF_491	South Africa	EPI_ISL_515864	female	26	live	Pharyngeal swab
ZAF_492	South Africa	EPI_ISL_482727	female	27	live	Pharyngeal swab
ZAF_493	South Africa	EPI_ISL_602697	male	30	live	Pharyngeal swab	eThekwini
ZAF_494	South Africa	EPI_ISL_529766	female	37	live	Pharyngeal swab
ZAF_495	South Africa	EPI_ISL_515662	female	50	live	Pharyngeal swab
ZAF_496	South Africa	EPI_ISL_487302	female	30	live	Pharyngeal swab	Zululand
ZAF_497	South Africa	EPI_ISL_498108	female	57	live	Pharyngeal swab
ZAF_498	South Africa	EPI_ISL_602891	female	35	live	Pharyngeal swab	Ilembe
ZAF_499	South Africa	EPI_ISL_602769	female	30	live	Pharyngeal swab	uMkhanyakude
ZAF_5	South Africa	EPI_ISL_515594	male	29	live	Pharyngeal swab
ZAF_50	South Africa	EPI_ISL_602695	male	59	live	Pharyngeal swab	eThekwini
ZAF_500	South Africa	EPI_ISL_602794	male	27	live	Pharyngeal swab	Ilembe
ZAF_501	South Africa	EPI_ISL_602706	female	24	live	Pharyngeal swab	eThekwini
ZAF_502	South Africa	EPI_ISL_535472	male	27	live	Pharyngeal swab	Ugu
ZAF_503	South Africa	EPI_ISL_602803	female	25	live	Pharyngeal swab	uMkhanyakude
ZAF_504	South Africa	EPI_ISL_509351	female	33	live	Pharyngeal swab	uThukela
ZAF_505	South Africa	EPI_ISL_529732	female	30	live	Pharyngeal swab
ZAF_506	South Africa	EPI_ISL_515636	female	36	live	Pharyngeal swab
ZAF_507	South Africa	EPI_ISL_660620	male	50	live	Pharyngeal swab
ZAF_508	South Africa	EPI_ISL_535449	female	62	live	Pharyngeal swab	uThukela
ZAF_509	South Africa	EPI_ISL_602838	male	68	live	Pharyngeal swab	Ugu
ZAF_51	South Africa	EPI_ISL_482725	male	23	live	Pharyngeal swab
ZAF_510	South Africa	EPI_ISL_535426	female	29	live	Pharyngeal swab	uThukela
ZAF_511	South Africa	EPI_ISL_602857	female	23	live	Pharyngeal swab	eThekwini
ZAF_512	South Africa	EPI_ISL_487339	male	43	live	Pharyngeal swab	eThekwini
ZAF_513	South Africa	EPI_ISL_602752	female	49	live	Pharyngeal swab	Harry Gwala
ZAF_514	South Africa	EPI_ISL_515580	female	40	live	Pharyngeal swab
ZAF_515	South Africa	EPI_ISL_509305	female	30	live	Pharyngeal swab	uMkhanyakude
ZAF_516	South Africa	EPI_ISL_515659	male	26	live	Pharyngeal swab
ZAF_517	South Africa	EPI_ISL_602651	female	49	live	Pharyngeal swab	Umzinyathi
ZAF_518	South Africa	EPI_ISL_495555	female	34	live	Pharyngeal swab
ZAF_519	South Africa	EPI_ISL_535525	female	37	live	Pharyngeal swab	King Cetshwayo
ZAF_52	South Africa	EPI_ISL_515866	male	22	live	Pharyngeal swab
ZAF_520	South Africa	EPI_ISL_635040	male	23	live	Pharyngeal swab
ZAF_521	South Africa	EPI_ISL_660196	female	53	live	Pharyngeal swab
ZAF_522	South Africa	EPI_ISL_509294	female	24	live	Pharyngeal swab	Zululand
ZAF_523	South Africa	EPI_ISL_509269	female	24	live	Pharyngeal swab	uThukela
ZAF_524	South Africa	EPI_ISL_515830	female	44	live	Pharyngeal swab
ZAF_525	South Africa	EPI_ISL_535390	female	50	live	Pharyngeal swab	uThukela
ZAF_526	South Africa	EPI_ISL_515735	male	28	live	Pharyngeal swab
ZAF_527	South Africa	EPI_ISL_660220	male	42	live	Pharyngeal swab
ZAF_528	South Africa	EPI_ISL_602773	female	29	live	Pharyngeal swab	eThekwini
ZAF_529	South Africa	EPI_ISL_535407	male	66	live	Pharyngeal swab	Umgungundlovu
ZAF_53	South Africa	EPI_ISL_660152	male	16	live	Pharyngeal swab	CC2
ZAF_530	South Africa	EPI_ISL_487318	male	48	live	Pharyngeal swab	eThekwini
ZAF_531	South Africa	EPI_ISL_518039	female	51	live	Pharyngeal swab
ZAF_532	South Africa	EPI_ISL_602876	female	77	live	Pharyngeal swab	Harry Gwala
ZAF_533	South Africa	EPI_ISL_498112	female	60	live	Pharyngeal swab
ZAF_534	South Africa	EPI_ISL_515685	male	10	live	Pharyngeal swab
ZAF_535	South Africa	EPI_ISL_515678	female	46	live	Pharyngeal swab
ZAF_536	South Africa	EPI_ISL_529781	male	35	live	Pharyngeal swab
ZAF_537	South Africa	EPI_ISL_509324	female	39	live	Pharyngeal swab	Amajuba
ZAF_538	South Africa	EPI_ISL_515617	female	39	live	Pharyngeal swab
ZAF_539	South Africa	EPI_ISL_535468	female	35	live	Pharyngeal swab	Ilembe
ZAF_54	South Africa	EPI_ISL_515763	female	31	live	Pharyngeal swab
ZAF_540	South Africa	EPI_ISL_602819	male	31	live	Pharyngeal swab	Umgungundlovu
ZAF_541	South Africa	EPI_ISL_660125	female	18	live	Pharyngeal swab	CC2
ZAF_542	South Africa	EPI_ISL_515714	male	81	live	Pharyngeal swab
ZAF_544	South Africa	EPI_ISL_509248	male	27	live	Pharyngeal swab	uThukela
ZAF_545	South Africa	EPI_ISL_660201	male	30	live	Pharyngeal swab
ZAF_546	South Africa	EPI_ISL_498083	female	62	live	Pharyngeal swab
ZAF_547	South Africa	EPI_ISL_482857	female	20	live	Pharyngeal swab
ZAF_548	South Africa	EPI_ISL_487289	female	48	live	Pharyngeal swab	Ilembe
ZAF_549	South Africa	EPI_ISL_535504	female	56	live	Pharyngeal swab	Ilembe
ZAF_55	South Africa	EPI_ISL_509250	male	19	live	Pharyngeal swab	Ilembe
ZAF_550	South Africa	EPI_ISL_602670	male	17	live	Pharyngeal swab	Umkhanyakude
ZAF_551	South Africa	EPI_ISL_515883	female	43	live	Pharyngeal swab
ZAF_553	South Africa	EPI_ISL_515786	male	82	live	Pharyngeal swab
ZAF_554	South Africa	EPI_ISL_660129	male	21	live	Pharyngeal swab	CC2
ZAF_555	South Africa	EPI_ISL_515718	male	39	live	Pharyngeal swab
ZAF_556	South Africa	EPI_ISL_509244	male	25	live	Pharyngeal swab	Ugu
ZAF_557	South Africa	EPI_ISL_495517	female	47	live	Pharyngeal swab
ZAF_559	South Africa	EPI_ISL_487278	female	47	live	Pharyngeal swab	eThekwini
ZAF_560	South Africa	EPI_ISL_602916	female	36	live	Pharyngeal swab	Ilembe
ZAF_561	South Africa	EPI_ISL_498072	male	12	live	Pharyngeal swab
ZAF_562	South Africa	EPI_ISL_487285	female	32	live	Pharyngeal swab	eThekwini
ZAF_563	South Africa	EPI_ISL_635002	female	34	live	Pharyngeal swab
ZAF_564	South Africa	EPI_ISL_535508	female	19	live	Pharyngeal swab	Ilembe
ZAF_565	South Africa	EPI_ISL_660262	female	3	live	Pharyngeal swab
ZAF_566	South Africa	EPI_ISL_482731	male	60	live	Pharyngeal swab
ZAF_567	South Africa	EPI_ISL_602681	male	75	live	Pharyngeal swab	Zululand
ZAF_568	South Africa	EPI_ISL_515872	female	41	live	Pharyngeal swab
ZAF_569	South Africa	EPI_ISL_660146	female	17	live	Pharyngeal swab	CC2
ZAF_57	South Africa	EPI_ISL_660219	female	40	live	Pharyngeal swab
ZAF_570	South Africa	EPI_ISL_515777	female	11	live	Pharyngeal swab
ZAF_571	South Africa	EPI_ISL_660662	female	27	live	Pharyngeal swab
ZAF_572	South Africa	EPI_ISL_602782	female	43	live	Pharyngeal swab	eThekwini
ZAF_573	South Africa	EPI_ISL_487314	female	33	live	Pharyngeal swab	Amajuba
ZAF_574	South Africa	EPI_ISL_518035	female	31	live	Pharyngeal swab
ZAF_575	South Africa	EPI_ISL_602887	male	52	live	Pharyngeal swab	Ilembe
ZAF_576	South Africa	EPI_ISL_529770	female	26	live	Pharyngeal swab
ZAF_577	South Africa	EPI_ISL_515689	female	52	live	Pharyngeal swab
ZAF_578	South Africa	EPI_ISL_515674	male	22	live	Pharyngeal swab
ZAF_579	South Africa	EPI_ISL_509328	male	48	live	Pharyngeal swab	Umzinyathi
ZAF_58	South Africa	EPI_ISL_602902	female	25	live	Pharyngeal swab	Ilembe
ZAF_580	South Africa	EPI_ISL_509347	male	14	live	Pharyngeal swab
ZAF_581	South Africa	EPI_ISL_602815	female	30	live	Pharyngeal swab	Ugu
ZAF_582	South Africa	EPI_ISL_535464	female	51	live	Pharyngeal swab	Ilembe
ZAF_583	South Africa	EPI_ISL_535499	female	38	live	Pharyngeal swab	Ilembe
ZAF_584	South Africa	EPI_ISL_602710	female	56	live	Pharyngeal swab	eThekwini
ZAF_585	South Africa	EPI_ISL_495559	male	25	live	Pharyngeal swab
ZAF_586	South Africa	EPI_ISL_660243	female	76	live	Pharyngeal swab
ZAF_587	South Africa	EPI_ISL_482710	female	45	live	Pharyngeal swab
ZAF_588	South Africa	EPI_ISL_535529	female	27	live	Pharyngeal swab	Ilembe
ZAF_589	South Africa	EPI_ISL_660167	female	43	live	Pharyngeal swab
ZAF_59	South Africa	EPI_ISL_487291	female	49	live	Pharyngeal swab	Umgungundlovu
ZAF_590	South Africa	EPI_ISL_515756	female	70	live	Pharyngeal swab
ZAF_591	South Africa	EPI_ISL_515853	female	16	live	Pharyngeal swab
ZAF_592	South Africa	EPI_ISL_509298	female	33	live	Pharyngeal swab	Umgungundlovu
ZAF_593	South Africa	EPI_ISL_509265	male	55	live	Pharyngeal swab	Umgungundlovu
ZAF_594	South Africa	EPI_ISL_515739	female	35	live	Pharyngeal swab
ZAF_595	South Africa	EPI_ISL_535546	male	36	live	Pharyngeal swab	King Cetshwayo
ZAF_596	South Africa	EPI_ISL_635023	female	64	live	Pharyngeal swab
ZAF_597	South Africa	EPI_ISL_602632	male	14	live	Pharyngeal swab	Ilembe
ZAF_598	South Africa	EPI_ISL_495536	male	28	live	Pharyngeal swab
ZAF_599	South Africa	EPI_ISL_634987	male	22	live	Pharyngeal swab
ZAF_60	South Africa	EPI_ISL_498066	female	23	live	Pharyngeal swab
ZAF_600	South Africa	EPI_ISL_509366	male	39	live	Pharyngeal swab	Ilembe
ZAF_601	South Africa	EPI_ISL_602731	female	37	live	Pharyngeal swab	Zululand
ZAF_602	South Africa	EPI_ISL_602834	female	19	live	Pharyngeal swab	eThekwini
ZAF_603	South Africa	EPI_ISL_535445	male	45	live	Pharyngeal swab	Ilembe
ZAF_604	South Africa	EPI_ISL_487335	female	42	live	Pharyngeal swab	eThekwini
ZAF_605	South Africa	EPI_ISL_660643	male	13	live	Pharyngeal swab
ZAF_606	South Africa	EPI_ISL_515571	female	57	live	Pharyngeal swab	CH4
ZAF_607	South Africa	EPI_ISL_509309	female	47	live	Pharyngeal swab	Amajuba
ZAF_608	South Africa	EPI_ISL_436685	female	52	live	Pharyngeal swab
ZAF_609	South Africa	EPI_ISL_529751	female	13	live	Pharyngeal swab
ZAF_61	South Africa	EPI_ISL_635016	female	38	live	Pharyngeal swab
ZAF_610	South Africa	EPI_ISL_515655	male	33	live	Pharyngeal swab
ZAF_611	South Africa	EPI_ISL_515703	female	42	live	Pharyngeal swab
ZAF_612	South Africa	EPI_ISL_660132	female	19	live	Pharyngeal swab	CC2
ZAF_614	South Africa	EPI_ISL_660216	female	64	live	Pharyngeal swab
ZAF_615	South Africa	EPI_ISL_498069	female	57	live	Pharyngeal swab
ZAF_616	South Africa	EPI_ISL_635019	male	25	live	Pharyngeal swab
ZAF_617	South Africa	EPI_ISL_498094	female	43	live	Pharyngeal swab
ZAF_618	South Africa	EPI_ISL_535513	female	53	live	Pharyngeal swab	Ilembe
ZAF_619	South Africa	EPI_ISL_602667	male	59	live	Pharyngeal swab	uthungulu
ZAF_62	South Africa	EPI_ISL_509353	male	30	live	Pharyngeal swab	Umgungundlovu
ZAF_620	South Africa	EPI_ISL_515869	female	25	live	Pharyngeal swab
ZAF_621	South Africa	EPI_ISL_509230	female	26	live	Pharyngeal swab	Zululand
ZAF_622	South Africa	EPI_ISL_515791	female	21	live	Pharyngeal swab
ZAF_623	South Africa	EPI_ISL_602799	female	47	live	Pharyngeal swab	ugu
ZAF_624	South Africa	EPI_ISL_602764	female	16	live	Pharyngeal swab	Umgungundlovu
ZAF_625	South Africa	EPI_ISL_498105	female	60	live	Pharyngeal swab
ZAF_626	South Africa	EPI_ISL_602861	female	42	live	Pharyngeal swab	eThekwini
ZAF_627	South Africa	EPI_ISL_535410	female	42	live	Pharyngeal swab	Amajuba
ZAF_628	South Africa	EPI_ISL_529796	male	65	live	Pharyngeal swab
ZAF_629	South Africa	EPI_ISL_515692	female	39	live	Pharyngeal swab
ZAF_63	South Africa	EPI_ISL_602801	male	34	live	Pharyngeal swab	uMkhanyakude
ZAF_630	South Africa	EPI_ISL_509333	male	53	live	Pharyngeal swab	Amajuba
ZAF_631	South Africa	EPI_ISL_529801	male	43	live	Pharyngeal swab
ZAF_632	South Africa	EPI_ISL_515600	female	35	live	Pharyngeal swab
ZAF_633	South Africa	EPI_ISL_535482	female	30	live	Pharyngeal swab	Ugu
ZAF_634	South Africa	EPI_ISL_518041	female	55	live	Pharyngeal swab
ZAF_635	South Africa	EPI_ISL_660616	female	55	live	Pharyngeal swab
ZAF_636	South Africa	EPI_ISL_660258	male	24	live	Pharyngeal swab
ZAF_637	South Africa	EPI_ISL_495542	female	68	live	Pharyngeal swab
ZAF_638	South Africa	EPI_ISL_602646	male	29	live	Pharyngeal swab	uMkhanyakude
ZAF_639	South Africa	EPI_ISL_635057	female	31	live	Pharyngeal swab
ZAF_64	South Africa	EPI_ISL_535470	male	60	live	Pharyngeal swab	Ilembe
ZAF_640	South Africa	EPI_ISL_535532	male	40	live	Pharyngeal swab	uMkhanyakude
ZAF_641	South Africa	EPI_ISL_660181	male	67	live	Pharyngeal swab
ZAF_642	South Africa	EPI_ISL_515848	male	22	live	Pharyngeal swab
ZAF_643	South Africa	EPI_ISL_515827	male	43	live	Pharyngeal swab
ZAF_644	South Africa	EPI_ISL_509283	female	22	live	Pharyngeal swab	Uthukela
ZAF_645	South Africa	EPI_ISL_515722	female	62	live	Pharyngeal swab
ZAF_646	South Africa	EPI_ISL_482861	female	72	live	Pharyngeal swab
ZAF_647	South Africa	EPI_ISL_635038	female	60	live	Pharyngeal swab
ZAF_648	South Africa	EPI_ISL_660237	female	50	live	Pharyngeal swab
ZAF_649	South Africa	EPI_ISL_602629	female	47	live	Pharyngeal swab	eThekwini
ZAF_65	South Africa	EPI_ISL_660619	female	58	live	Pharyngeal swab
ZAF_650	South Africa	EPI_ISL_515621	female	18	live	Pharyngeal swab
ZAF_651	South Africa	EPI_ISL_529725	female	17	live	Pharyngeal swab
ZAF_652	South Africa	EPI_ISL_660637	female	46	live	Pharyngeal swab
ZAF_653	South Africa	EPI_ISL_487341	female	56	live	Pharyngeal swab	eThekwini
ZAF_654	South Africa	EPI_ISL_498124	female	55	live	Pharyngeal swab
ZAF_655	South Africa	EPI_ISL_602840	female	50	live	Pharyngeal swab	Harry Gwala
ZAF_656	South Africa	EPI_ISL_535431	male	76	live	Pharyngeal swab	King Cetshwayo
ZAF_657	South Africa	EPI_ISL_515597	female	35	live	Pharyngeal swab
ZAF_658	South Africa	EPI_ISL_660658	female	81	live	Pharyngeal swab
ZAF_659	South Africa	EPI_ISL_602745	female	37	live	Pharyngeal swab	ugu
ZAF_66	South Africa	EPI_ISL_602704	male	25	live	Pharyngeal swab	eThekwini
ZAF_660	South Africa	EPI_ISL_509312	female	34	live	Pharyngeal swab	eThekwini
ZAF_661	South Africa	EPI_ISL_529729	male	57	live	Pharyngeal swab
ZAF_662	South Africa	EPI_ISL_509371	male	37	live	Pharyngeal swab	Ilembe
ZAF_663	South Africa	EPI_ISL_634990	female	41	live	Pharyngeal swab
ZAF_664	South Africa	EPI_ISL_602726	female	16	live	Pharyngeal swab	uThukela
ZAF_665	South Africa	EPI_ISL_535452	female	35	live	Pharyngeal swab	Ugu
ZAF_666	South Africa	EPI_ISL_602823	female	33	live	Pharyngeal swab	Umgungundlovu
ZAF_667	South Africa	EPI_ISL_487322	female	19	live	Pharyngeal swab	Amajuba
ZAF_668	South Africa	EPI_ISL_602749	female	59	live	Pharyngeal swab	Zululand
ZAF_669	South Africa	EPI_ISL_660654	male	56	live	Pharyngeal swab
ZAF_67	South Africa	EPI_ISL_602796	male	38	live	Pharyngeal swab	uMkhanyakude
ZAF_670	South Africa	EPI_ISL_515642	female	40	live	Pharyngeal swab
ZAF_671	South Africa	EPI_ISL_529746	male	15	live	Pharyngeal swab
ZAF_672	South Africa	EPI_ISL_482707	female	41	live	Pharyngeal swab
ZAF_673	South Africa	EPI_ISL_660254	male	28	live	Pharyngeal swab
ZAF_674	South Africa	EPI_ISL_515741	male	14	live	Pharyngeal swab
ZAF_675	South Africa	EPI_ISL_660170	female	66	live	Pharyngeal swab
ZAF_676	South Africa	EPI_ISL_515844	female	69	live	Pharyngeal swab
ZAF_677	South Africa	EPI_ISL_509272	male	45	live	Pharyngeal swab	uThukela
ZAF_678	South Africa	EPI_ISL_635034	male	56	live	Pharyngeal swab
ZAF_679	South Africa	EPI_ISL_602920	female	39	live	Pharyngeal swab	Harry Gwala
ZAF_68	South Africa	EPI_ISL_487300	female	41	live	Pharyngeal swab	Zululand
ZAF_680	South Africa	EPI_ISL_535551	female	70	live	Pharyngeal swab	King Cetshwayo
ZAF_681	South Africa	EPI_ISL_495521	female	88	live	Pharyngeal swab
ZAF_682	South Africa	EPI_ISL_602625	female	41	deceased	Pharyngeal swab	eThekwini
ZAF_683	South Africa	EPI_ISL_602795	male	52	live	Pharyngeal swab	ugu
ZAF_684	South Africa	EPI_ISL_602768	female	30	live	Pharyngeal swab	uMkhanyakude
ZAF_685	South Africa	EPI_ISL_602890	male	11	live	Pharyngeal swab	Zululand
ZAF_686	South Africa	EPI_ISL_498109	female	58	live	Pharyngeal swab
ZAF_687	South Africa	EPI_ISL_487303	female	47	live	Pharyngeal swab	Zululand
ZAF_688	South Africa	EPI_ISL_515663	male	17	live	Pharyngeal swab
ZAF_69	South Africa	EPI_ISL_602893	male	49	live	Pharyngeal swab	Ilembe
ZAF_690	South Africa	EPI_ISL_509350	female	30	live	Pharyngeal swab	uThukela
ZAF_691	South Africa	EPI_ISL_535473	female	73	live	Pharyngeal swab	Ugu
ZAF_692	South Africa	EPI_ISL_602802	female	45	live	Pharyngeal swab	uMkhanyakude
ZAF_693	South Africa	EPI_ISL_602707	female	23	live	Pharyngeal swab	eThekwini
ZAF_694	South Africa	EPI_ISL_509253	female	33	live	Pharyngeal swab	uThukela
ZAF_695	South Africa	EPI_ISL_635015	female	53	live	Pharyngeal swab
ZAF_696	South Africa	EPI_ISL_487292	female	22	live	Pharyngeal swab	Zululand
ZAF_697	South Africa	EPI_ISL_498065	female	20	live	Pharyngeal swab
ZAF_698	South Africa	EPI_ISL_498098	male	33	live	Pharyngeal swab
ZAF_699	South Africa	EPI_ISL_602901	male	42	live	Pharyngeal swab	Ilembe
ZAF_7	South Africa	EPI_ISL_529749	female	35	live	Pharyngeal swab
ZAF_70	South Africa	EPI_ISL_529764	male	67	live	Pharyngeal swab
ZAF_701	South Africa	EPI_ISL_602696	female	36	live	Pharyngeal swab	eThekwini
ZAF_702	South Africa	EPI_ISL_482726	female	36	live	Pharyngeal swab
ZAF_703	South Africa	EPI_ISL_515865	female	11	live	Pharyngeal swab
ZAF_704	South Africa	EPI_ISL_515760	female	37	live	Pharyngeal swab
ZAF_705	South Africa	EPI_ISL_660151	female	22	live	Pharyngeal swab	CC2
ZAF_706	South Africa	EPI_ISL_660197	female	62	live	Pharyngeal swab
ZAF_707	South Africa	EPI_ISL_635041	male	61	live	Pharyngeal swab
ZAF_708	South Africa	EPI_ISL_535524	female	38	live	Pharyngeal swab	Ilembe
ZAF_709	South Africa	EPI_ISL_495554	male	9	live	Pharyngeal swab
ZAF_71	South Africa	EPI_ISL_529799	female	54	live	Pharyngeal swab
ZAF_710	South Africa	EPI_ISL_602650	female	77	live	Pharyngeal swab	Umzinyathi
ZAF_711	South Africa	EPI_ISL_660221	male	29	live	Pharyngeal swab
ZAF_712	South Africa	EPI_ISL_515734	female	21	live	Pharyngeal swab
ZAF_713	South Africa	EPI_ISL_535391	male	12	live	Pharyngeal swab	Amajuba
ZAF_714	South Africa	EPI_ISL_515831	female	56	live	Pharyngeal swab
ZAF_715	South Africa	EPI_ISL_509268	female	22	live	Pharyngeal swab	uThukela
ZAF_716	South Africa	EPI_ISL_509295	male	33	live	Pharyngeal swab	Zululand
ZAF_717	South Africa	EPI_ISL_535448	male	15	live	Pharyngeal swab	Ilembe
ZAF_718	South Africa	EPI_ISL_602839	female	70	live	Pharyngeal swab	Ugu
ZAF_719	South Africa	EPI_ISL_660621	male	50	live	Pharyngeal swab
ZAF_72	South Africa	EPI_ISL_515660	male	50	live	Pharyngeal swab
ZAF_720	South Africa	EPI_ISL_515637	male	29	live	Pharyngeal swab
ZAF_721	South Africa	EPI_ISL_529733	female	89	live	Pharyngeal swab
ZAF_722	South Africa	EPI_ISL_515658	male	1	live	Pharyngeal swab
ZAF_723	South Africa	EPI_ISL_509304	female	36	live	Pharyngeal swab	eThekwini
ZAF_724	South Africa	EPI_ISL_515581	female	29	live	Pharyngeal swab
ZAF_725	South Africa	EPI_ISL_602753	male	53	live	Pharyngeal swab	Ilembe
ZAF_726	South Africa	EPI_ISL_535427	female	8	live	Pharyngeal swab	Umgungundlovu
ZAF_727	South Africa	EPI_ISL_487338	female	13	live	Pharyngeal swab	eThekwini
ZAF_728	South Africa	EPI_ISL_602856	male	36	live	Pharyngeal swab	eThekwini
ZAF_729	South Africa	EPI_ISL_487288	female	43	live	Pharyngeal swab	eThekwini
ZAF_73	South Africa	EPI_ISL_515828	female	37	live	Pharyngeal swab
ZAF_730	South Africa	EPI_ISL_482856	female	25	live	Pharyngeal swab
ZAF_731	South Africa	EPI_ISL_498082	female	42	live	Pharyngeal swab
ZAF_732	South Africa	EPI_ISL_660200	male	60	live	Pharyngeal swab
ZAF_733	South Africa	EPI_ISL_509249	female	22	live	Pharyngeal swab	Uthukela
ZAF_735	South Africa	EPI_ISL_515715	male	79	live	Pharyngeal swab
ZAF_736	South Africa	EPI_ISL_660124	female	18	live	Pharyngeal swab	CC2
ZAF_738	South Africa	EPI_ISL_509226	male	35	live	Pharyngeal swab	ugu
ZAF_739	South Africa	EPI_ISL_515882	male	56	live	Pharyngeal swab
ZAF_74	South Africa	EPI_ISL_509271	female	8	live	Pharyngeal swab	Umgungundlovu
ZAF_740	South Africa	EPI_ISL_602671	male	6	live	Pharyngeal swab
ZAF_741	South Africa	EPI_ISL_535505	male	2	live	Pharyngeal swab
ZAF_742	South Africa	EPI_ISL_509325	female	32	live	Pharyngeal swab	eThekwini
ZAF_743	South Africa	EPI_ISL_529780	female	21	live	Pharyngeal swab
ZAF_744	South Africa	EPI_ISL_515679	female	37	live	Pharyngeal swab
ZAF_745	South Africa	EPI_ISL_515684	female	36	live	Pharyngeal swab
ZAF_746	South Africa	EPI_ISL_498113	female	34	live	Pharyngeal swab
ZAF_747	South Africa	EPI_ISL_535406	female	57	live	Pharyngeal swab	Amajuba
ZAF_748	South Africa	EPI_ISL_602877	male	24	live	Pharyngeal swab	Zululand
ZAF_749	South Africa	EPI_ISL_518038	female	39	live	Pharyngeal swab
ZAF_750	South Africa	EPI_ISL_487319	female	16	live	Pharyngeal swab	Amajuba
ZAF_751	South Africa	EPI_ISL_602772	male	61	live	Pharyngeal swab	ugu
ZAF_752	South Africa	EPI_ISL_535469	female	32	live	Pharyngeal swab	Ilembe
ZAF_754	South Africa	EPI_ISL_515616	female	62	live	Pharyngeal swab
ZAF_755	South Africa	EPI_ISL_509329	female	44	live	Pharyngeal swab	Zululand
ZAF_756	South Africa	EPI_ISL_515675	male	26	live	Pharyngeal swab
ZAF_757	South Africa	EPI_ISL_515688	female	39	live	Pharyngeal swab
ZAF_758	South Africa	EPI_ISL_529771	female	57	live	Pharyngeal swab
ZAF_759	South Africa	EPI_ISL_602886	female	40	live	Pharyngeal swab	Ilembe
ZAF_76	South Africa	EPI_ISL_602923	female	85	live	Pharyngeal swab	Zululand
ZAF_760	South Africa	EPI_ISL_518034	female	28	live	Pharyngeal swab
ZAF_762	South Africa	EPI_ISL_602783	male	32	live	Pharyngeal swab	Umgungundlovu
ZAF_763	South Africa	EPI_ISL_660663	female	48	live	Pharyngeal swab
ZAF_764	South Africa	EPI_ISL_602711	male	75	live	Pharyngeal swab	eThekwini
ZAF_765	South Africa	EPI_ISL_535498	female	18	live	Pharyngeal swab	uthungulu
ZAF_766	South Africa	EPI_ISL_602814	female	47	live	Pharyngeal swab	Ugu
ZAF_767	South Africa	EPI_ISL_535465	female	54	live	Pharyngeal swab	Ilembe
ZAF_768	South Africa	EPI_ISL_509346	female	45	live	Pharyngeal swab	Zululand
ZAF_769	South Africa	EPI_ISL_487284	female	42	live	Pharyngeal swab	eThekwini
ZAF_77	South Africa	EPI_ISL_635037	female	22	live	Pharyngeal swab
ZAF_770	South Africa	EPI_ISL_498073	female	40	live	Pharyngeal swab
ZAF_771	South Africa	EPI_ISL_635003	male	79	live	Pharyngeal swab
ZAF_773	South Africa	EPI_ISL_602917	female	18	live	Pharyngeal swab	Zululand
ZAF_774	South Africa	EPI_ISL_487279	male	36	live	Pharyngeal swab	eThekwini
ZAF_775	South Africa	EPI_ISL_495516	female	35	live	Pharyngeal swab
ZAF_776	South Africa	EPI_ISL_509245	female	45	live	Pharyngeal swab	Zululand
ZAF_777	South Africa	EPI_ISL_515719	female	44	live	Pharyngeal swab
ZAF_778	South Africa	EPI_ISL_660128	male	18	live	Pharyngeal swab	CC2
ZAF_78	South Africa	EPI_ISL_602626	female	55	live	Pharyngeal swab	eThekwini
ZAF_780	South Africa	EPI_ISL_660147	male	18	live	Pharyngeal swab	CC2
ZAF_781	South Africa	EPI_ISL_515873	female	29	live	Pharyngeal swab
ZAF_782	South Africa	EPI_ISL_660263	male	81	live	Pharyngeal swab
ZAF_783	South Africa	EPI_ISL_602680	female	56	live	Pharyngeal swab	Zululand
ZAF_784	South Africa	EPI_ISL_482730	female	19	live	Pharyngeal swab
ZAF_785	South Africa	EPI_ISL_535509	male	39	live	Pharyngeal swab	Ilembe
ZAF_786	South Africa	EPI_ISL_602835	male	36	live	Pharyngeal swab	ugu
ZAF_787	South Africa	EPI_ISL_535444	female	22	live	Pharyngeal swab	ugu
ZAF_788	South Africa	EPI_ISL_602730	male	33	live	Pharyngeal swab	Zululand
ZAF_789	South Africa	EPI_ISL_634986	female	23	live	Pharyngeal swab
ZAF_79	South Africa	EPI_ISL_495522	female	34	live	Pharyngeal swab
ZAF_790	South Africa	EPI_ISL_509367	female	41	live	Pharyngeal swab	Ilembe
ZAF_791	South Africa	EPI_ISL_515654	female	54	live	Pharyngeal swab
ZAF_792	South Africa	EPI_ISL_436684	female	26	live	Pharyngeal swab
ZAF_793	South Africa	EPI_ISL_529750	male	65	live	Pharyngeal swab
ZAF_794	South Africa	EPI_ISL_509308	female	44	live	Pharyngeal swab	eThekwini
ZAF_795	South Africa	EPI_ISL_515570	female	30	live	Pharyngeal swab	CH4
ZAF_796	South Africa	EPI_ISL_660642	male	47	live	Pharyngeal swab
ZAF_797	South Africa	EPI_ISL_487334	male	35	live	Pharyngeal swab	eThekwini
ZAF_798	South Africa	EPI_ISL_515852	female	37	live	Pharyngeal swab
ZAF_799	South Africa	EPI_ISL_515757	female	45	live	Pharyngeal swab
ZAF_8	South Africa	EPI_ISL_529726	female	41	live	Pharyngeal swab
ZAF_80	South Africa	EPI_ISL_660238	male	61	live	Pharyngeal swab
ZAF_800	South Africa	EPI_ISL_660166	female	41	live	Pharyngeal swab
ZAF_801	South Africa	EPI_ISL_535528	male	13	live	Pharyngeal swab	Ilembe
ZAF_802	South Africa	EPI_ISL_660242	female	20	live	Pharyngeal swab
ZAF_803	South Africa	EPI_ISL_495558	male	3	live	Pharyngeal swab
ZAF_804	South Africa	EPI_ISL_482711	female	34	live	Pharyngeal swab
ZAF_805	South Africa	EPI_ISL_495537	female	31	live	Pharyngeal swab
ZAF_806	South Africa	EPI_ISL_602633	male	25	live	Pharyngeal swab	Ilembe
ZAF_807	South Africa	EPI_ISL_635022	female	58	live	Pharyngeal swab
ZAF_808	South Africa	EPI_ISL_535547	male	24	live	Pharyngeal swab	uMkhanyakude
ZAF_809	South Africa	EPI_ISL_515738	female	77	live	Pharyngeal swab
ZAF_81	South Africa	EPI_ISL_602649	female	30	live	Pharyngeal swab	uThukela
ZAF_810	South Africa	EPI_ISL_509264	female	81	live	Pharyngeal swab	uThukela
ZAF_811	South Africa	EPI_ISL_509299	female	47	live	Pharyngeal swab	uThukela
ZAF_812	South Africa	EPI_ISL_515664	female	21	live	Pharyngeal swab
ZAF_813	South Africa	EPI_ISL_515699	female	57	live	Pharyngeal swab
ZAF_814	South Africa	EPI_ISL_529760	male	26	live	Pharyngeal swab
ZAF_815	South Africa	EPI_ISL_509338	female	50	live	Pharyngeal swab	Zululand
ZAF_816	South Africa	EPI_ISL_602792	female	72	live	Pharyngeal swab	Umkhanyakude
ZAF_817	South Africa	EPI_ISL_602897	female	11	live	Pharyngeal swab	Ilembe
ZAF_819	South Africa	EPI_ISL_535474	male	14	live	Pharyngeal swab	Ilembe
ZAF_82	South Africa	EPI_ISL_660257	male	28	live	Pharyngeal swab
ZAF_820	South Africa	EPI_ISL_602805	female	65	live	Pharyngeal swab	Umkhanyakude
ZAF_821	South Africa	EPI_ISL_602700	male	6	live	Pharyngeal swab
ZAF_822	South Africa	EPI_ISL_509357	male	18	live	Pharyngeal swab	Ilembe
ZAF_823	South Africa	EPI_ISL_635012	female	12	live	Pharyngeal swab
ZAF_824	South Africa	EPI_ISL_487295	female	47	live	Pharyngeal swab	Umgungundlovu
ZAF_825	South Africa	EPI_ISL_498062	male	19	live	Pharyngeal swab
ZAF_826	South Africa	EPI_ISL_602906	female	46	live	Pharyngeal swab	uMkhanyakude
ZAF_827	South Africa	EPI_ISL_515708	male	68	live	Pharyngeal swab
ZAF_829	South Africa	EPI_ISL_509254	female	24	live	Pharyngeal swab	Ugu
ZAF_83	South Africa	EPI_ISL_482704	male	27	live	Pharyngeal swab
ZAF_830	South Africa	EPI_ISL_515862	female	41	live	Pharyngeal swab
ZAF_831	South Africa	EPI_ISL_515767	male	50	live	Pharyngeal swab
ZAF_832	South Africa	EPI_ISL_660156	female	17	live	Pharyngeal swab	CC2
ZAF_833	South Africa	EPI_ISL_535518	female	2	live	Pharyngeal swab
ZAF_834	South Africa	EPI_ISL_602691	male	83	live	Pharyngeal swab	eThekwini
ZAF_836	South Africa	EPI_ISL_602721	female	2	live	Pharyngeal swab
ZAF_837	South Africa	EPI_ISL_535455	female	67	live	Pharyngeal swab	ugu
ZAF_838	South Africa	EPI_ISL_602824	male	45	live	Pharyngeal swab	Ilembe
ZAF_839	South Africa	EPI_ISL_634997	male	35	live	Pharyngeal swab
ZAF_84	South Africa	EPI_ISL_635058	female	36	live	Pharyngeal swab
ZAF_841	South Africa	EPI_ISL_515645	female	37	live	Pharyngeal swab
ZAF_842	South Africa	EPI_ISL_529741	male	46	live	Pharyngeal swab
ZAF_843	South Africa	EPI_ISL_487325	female	48	live	Pharyngeal swab	eThekwini
ZAF_844	South Africa	EPI_ISL_660653	female	42	live	Pharyngeal swab
ZAF_845	South Africa	EPI_ISL_515746	male	33	live	Pharyngeal swab
ZAF_846	South Africa	EPI_ISL_660177	female	36	live	Pharyngeal swab
ZAF_847	South Africa	EPI_ISL_515843	female	25	live	Pharyngeal swab
ZAF_848	South Africa	EPI_ISL_660253	female	50	live	Pharyngeal swab
ZAF_849	South Africa	EPI_ISL_495549	female	32	live	Pharyngeal swab
ZAF_85	South Africa	EPI_ISL_660173	male	37	live	Pharyngeal swab
ZAF_850	South Africa	EPI_ISL_535539	male	27	live	Pharyngeal swab	uMkhanyakude
ZAF_851	South Africa	EPI_ISL_635033	female	30	live	Pharyngeal swab
ZAF_852	South Africa	EPI_ISL_602927	male	10	live	Pharyngeal swab	Umgungundlovu
ZAF_854	South Africa	EPI_ISL_495526	female	32	live	Pharyngeal swab
ZAF_855	South Africa	EPI_ISL_602622	female	54	live	Pharyngeal swab
ZAF_856	South Africa	EPI_ISL_509275	female	5	live	Pharyngeal swab
ZAF_857	South Africa	EPI_ISL_509288	male	50	live	Pharyngeal swab	Zululand
ZAF_858	South Africa	EPI_ISL_515729	female	43	live	Pharyngeal swab
ZAF_859	South Africa	EPI_ISL_660186	female	61	live	Pharyngeal swab
ZAF_86	South Africa	EPI_ISL_515742	female	39	live	Pharyngeal swab	Ilembe
ZAF_860	South Africa	EPI_ISL_495545	female	22	live	Pharyngeal swab
ZAF_861	South Africa	EPI_ISL_602641	female	61	live	Pharyngeal swab	Zululand
ZAF_862	South Africa	EPI_ISL_635050	female	57	live	Pharyngeal swab
ZAF_863	South Africa	EPI_ISL_535535	female	37	live	Pharyngeal swab	uMkhanyakude
ZAF_864	South Africa	EPI_ISL_482866	female	43	live	Pharyngeal swab
ZAF_865	South Africa	EPI_ISL_660230	male	24	live	Pharyngeal swab	CS1
ZAF_867	South Africa	EPI_ISL_509279	female	15	live	Pharyngeal swab	uThukela
ZAF_868	South Africa	EPI_ISL_509284	male	35	live	Pharyngeal swab	uThukela
ZAF_869	South Africa	EPI_ISL_515725	male	1	live	Pharyngeal swab
ZAF_87	South Africa	EPI_ISL_515847	male	34	live	Pharyngeal swab
ZAF_870	South Africa	EPI_ISL_660630	male	66	live	Pharyngeal swab
ZAF_871	South Africa	EPI_ISL_602828	male	58	live	Pharyngeal swab	uMkhanyakude
ZAF_872	South Africa	EPI_ISL_535459	female	65	live	Pharyngeal swab	ugu
ZAF_873	South Africa	EPI_ISL_515626	male	40	live	Pharyngeal swab
ZAF_874	South Africa	EPI_ISL_529722	female	10	live	Pharyngeal swab
ZAF_875	South Africa	EPI_ISL_509315	male	53	live	Pharyngeal swab	uThukela
ZAF_876	South Africa	EPI_ISL_515649	male	26	live	Pharyngeal swab
ZAF_877	South Africa	EPI_ISL_498123	female	26	live	Pharyngeal swab
ZAF_878	South Africa	EPI_ISL_487329	male	57	live	Pharyngeal swab	eThekwini
ZAF_879	South Africa	EPI_ISL_602847	female	60	live	Pharyngeal swab	eThekwini
ZAF_88	South Africa	EPI_ISL_487321	female	64	live	Pharyngeal swab	eThekwini
ZAF_880	South Africa	EPI_ISL_535436	female	40	live	Pharyngeal swab	King Cetshwayo
ZAF_881	South Africa	EPI_ISL_515590	male	52	live	Pharyngeal swab	CH3
ZAF_882	South Africa	EPI_ISL_602742	male	63	live	Pharyngeal swab	uThukela
ZAF_883	South Africa	EPI_ISL_660211	female	19	live	Pharyngeal swab
ZAF_884	South Africa	EPI_ISL_487299	female	29	live	Pharyngeal swab	Zululand
ZAF_885	South Africa	EPI_ISL_498093	female	20	live	Pharyngeal swab
ZAF_886	South Africa	EPI_ISL_515704	female	40	live	Pharyngeal swab
ZAF_887	South Africa	EPI_ISL_660135	male	19	live	Pharyngeal swab	CC2
ZAF_888	South Africa	EPI_ISL_509258	female	58	live	Pharyngeal swab	uThukela
ZAF_889	South Africa	EPI_ISL_515801	female	12	live	Pharyngeal swab
ZAF_89	South Africa	EPI_ISL_660657	male	10	live	Pharyngeal swab
ZAF_890	South Africa	EPI_ISL_509237	female	22	live	Pharyngeal swab	Zululand
ZAF_891	South Africa	EPI_ISL_515893	male	70	live	Pharyngeal swab
ZAF_892	South Africa	EPI_ISL_515796	female	25	live	Pharyngeal swab
ZAF_893	South Africa	EPI_ISL_535514	female	57	live	Pharyngeal swab	Ilembe
ZAF_894	South Africa	EPI_ISL_602660	female	37	live	Pharyngeal swab
ZAF_895	South Africa	EPI_ISL_529791	female	37	live	Pharyngeal swab
ZAF_896	South Africa	EPI_ISL_515668	female	34	live	Pharyngeal swab
ZAF_897	South Africa	EPI_ISL_515695	female	36	live	Pharyngeal swab
ZAF_898	South Africa	EPI_ISL_509334	male	50	live	Pharyngeal swab	uThukela
ZAF_899	South Africa	EPI_ISL_602763	male	18	live	Pharyngeal swab	Umgungundlovu
ZAF_9	South Africa	EPI_ISL_515622	female	58	live	Pharyngeal swab
ZAF_90	South Africa	EPI_ISL_515598	female	45	live	Pharyngeal swab
ZAF_900	South Africa	EPI_ISL_498102	female	24	live	Pharyngeal swab
ZAF_902	South Africa	EPI_ISL_487308	female	34	live	Pharyngeal swab	Ugu
ZAF_903	South Africa	EPI_ISL_535417	female	19	live	Pharyngeal swab	Zululand
ZAF_904	South Africa	EPI_ISL_535485	male	83	live	Pharyngeal swab	Ilembe
ZAF_905	South Africa	EPI_ISL_602809	female	22	live	Pharyngeal swab	Ilembe
ZAF_906	South Africa	EPI_ISL_518046	female	60	live	Pharyngeal swab
ZAF_907	South Africa	EPI_ISL_535478	female	46	live	Pharyngeal swab	Ilembe
ZAF_908	South Africa	EPI_ISL_660611	female	51	live	Pharyngeal swab
ZAF_909	South Africa	EPI_ISL_515607	male	36	live	Pharyngeal swab
ZAF_91	South Africa	EPI_ISL_529745	male	10	live	Pharyngeal swab
ZAF_910	South Africa	EPI_ISL_634981	male	92	live	Pharyngeal swab
ZAF_911	South Africa	EPI_ISL_509360	female	23	live	Pharyngeal swab	Ilembe
ZAF_913	South Africa	EPI_ISL_602832	female	35	live	Pharyngeal swab	uMkhanyakude
ZAF_914	South Africa	EPI_ISL_535443	female	39	live	Pharyngeal swab	Ilembe
ZAF_915	South Africa	EPI_ISL_602737	male	46	live	Pharyngeal swab	King Cetshwayo
ZAF_916	South Africa	EPI_ISL_660645	male	47	live	Pharyngeal swab
ZAF_917	South Africa	EPI_ISL_515577	female	44	live	Pharyngeal swab
ZAF_918	South Africa	EPI_ISL_602758	male	7	live	Pharyngeal swab
ZAF_919	South Africa	EPI_ISL_487333	female	47	live	Pharyngeal swab	eThekwini
ZAF_92	South Africa	EPI_ISL_515641	female	28	live	Pharyngeal swab
ZAF_920	South Africa	EPI_ISL_515653	female	69	live	Pharyngeal swab
ZAF_921	South Africa	EPI_ISL_529757	male	71	live	Pharyngeal swab
ZAF_922	South Africa	EPI_ISL_605789	female	17	live	Pharyngeal swab	Umkhanyakude
ZAF_925	South Africa	EPI_ISL_515855	male	26	live	Pharyngeal swab
ZAF_926	South Africa	EPI_ISL_515750	female	33	live	Pharyngeal swab
ZAF_928	South Africa	EPI_ISL_509263	female	8	live	Pharyngeal swab	Uthukela
ZAF_929	South Africa	EPI_ISL_495530	male	25	live	Pharyngeal swab
ZAF_93	South Africa	EPI_ISL_634993	female	7	live	Pharyngeal swab
ZAF_930	South Africa	EPI_ISL_602634	female	40	live	Pharyngeal swab	Ilembe
ZAF_931	South Africa	EPI_ISL_498055	male	31	live	Pharyngeal swab
ZAF_932	South Africa	EPI_ISL_635025	female	34	live	Pharyngeal swab
ZAF_933	South Africa	EPI_ISL_535540	female	46	live	Pharyngeal swab	Ilembe
ZAF_934	South Africa	EPI_ISL_602881	female	22	live	Pharyngeal swab	ugu
ZAF_935	South Africa	EPI_ISL_498118	female	18	live	Pharyngeal swab
ZAF_936	South Africa	EPI_ISL_518033	female	35	live	Pharyngeal swab
ZAF_937	South Africa	EPI_ISL_487312	female	61	live	Pharyngeal swab	uThukela
ZAF_938	South Africa	EPI_ISL_602784	male	46	live	Pharyngeal swab	sisonke
ZAF_939	South Africa	EPI_ISL_660664	male	21	live	Pharyngeal swab	CE1
ZAF_94	South Africa	EPI_ISL_660638	female	55	live	Pharyngeal swab
ZAF_940	South Africa	EPI_ISL_602779	male	22	live	Pharyngeal swab	Ilembe
ZAF_941	South Africa	EPI_ISL_515672	male	61	live	Pharyngeal swab
ZAF_943	South Africa	EPI_ISL_509341	female	67	live	Pharyngeal swab	Umgungundlovu
ZAF_944	South Africa	EPI_ISL_602716	male	51	live	Pharyngeal swab	sisonke
ZAF_945	South Africa	EPI_ISL_602813	female	5	live	Pharyngeal swab
ZAF_946	South Africa	EPI_ISL_535462	female	63	live	Pharyngeal swab	Ilembe
ZAF_947	South Africa	EPI_ISL_509242	female	15	live	Pharyngeal swab	Umgungundlovu
ZAF_948	South Africa	EPI_ISL_487283	female	47	live	Pharyngeal swab	eThekwini
ZAF_949	South Africa	EPI_ISL_498074	female	36	live	Pharyngeal swab
ZAF_95	South Africa	EPI_ISL_602725	female	36	live	Pharyngeal swab	Umgungundlovu
ZAF_950	South Africa	EPI_ISL_635004	female	28	live	Pharyngeal swab
ZAF_952	South Africa	EPI_ISL_498089	female	20	live	Pharyngeal swab
ZAF_953	South Africa	EPI_ISL_602910	male	37	live	Pharyngeal swab
ZAF_954	South Africa	EPI_ISL_602687	male	9	live	Pharyngeal swab	eThekwini
ZAF_955	South Africa	EPI_ISL_515771	female	34	live	Pharyngeal swab	Ugu
ZAF_957	South Africa	EPI_ISL_515874	female	69	live	Pharyngeal swab
ZAF_958	South Africa	EPI_ISL_515889	female	52	live	Pharyngeal swab
ZAF_96	South Africa	EPI_ISL_602820	female	43	live	Pharyngeal swab	ugu
ZAF_960	South Africa	EPI_ISL_515712	female	77	live	Pharyngeal swab
ZAF_961	South Africa	EPI_ISL_660123	female	19	live	Pharyngeal swab	CC2
ZAF_962	South Africa	EPI_ISL_635008	female	48	live	Pharyngeal swab
ZAF_964	South Africa	EPI_ISL_498078	male	1	live	Pharyngeal swab
ZAF_965	South Africa	EPI_ISL_498085	female	56	live	Pharyngeal swab
ZAF_966	South Africa	EPI_ISL_660207	female	42	live	Pharyngeal swab	eThekwini
ZAF_967	South Africa	EPI_ISL_602676	female	24	live	Pharyngeal swab	Zululand
ZAF_968	South Africa	EPI_ISL_535502	male	37	live	Pharyngeal swab
ZAF_969	South Africa	EPI_ISL_515780	male	29	live	Pharyngeal swab
ZAF_97	South Africa	EPI_ISL_535451	female	26	live	Pharyngeal swab	Ugu
ZAF_970	South Africa	EPI_ISL_515878	male	37	live	Pharyngeal swab
ZAF_971	South Africa	EPI_ISL_515885	male	37	live	Pharyngeal swab
ZAF_972	South Africa	EPI_ISL_498114	male	27	live	Pharyngeal swab
ZAF_973	South Africa	EPI_ISL_535401	female	29	live	Pharyngeal swab	Umgungundlovu
ZAF_974	South Africa	EPI_ISL_602870	female	56	live	Pharyngeal swab	Harry Gwala
ZAF_975	South Africa	EPI_ISL_602788	male	27	live	Pharyngeal swab	Umgungundlovu
ZAF_976	South Africa	EPI_ISL_602775	female	57	live	Pharyngeal swab	eThekwini
ZAF_977	South Africa	EPI_ISL_509322	female	24	live	Pharyngeal swab	Umzinyathi
ZAF_979	South Africa	EPI_ISL_515683	female	58	live	Pharyngeal swab
ZAF_98	South Africa	EPI_ISL_535497	female	63	live	Pharyngeal swab	Ilembe
ZAF_981	South Africa	EPI_ISL_660607	female	8	live	Pharyngeal swab
ZAF_983	South Africa	EPI_ISL_635046	female	21	live	Pharyngeal swab
ZAF_984	South Africa	EPI_ISL_535523	female	34	live	Pharyngeal swab	Ilembe
ZAF_985	South Africa	EPI_ISL_660249	male	48	live	Pharyngeal swab
ZAF_986	South Africa	EPI_ISL_495553	male	32	live	Pharyngeal swab
ZAF_987	South Africa	EPI_ISL_602657	female	37	live	Pharyngeal swab	Zululand
ZAF_988	South Africa	EPI_ISL_515859	female	50	live	Pharyngeal swab
ZAF_989	South Africa	EPI_ISL_660190	female	72	live	Pharyngeal swab
ZAF_99	South Africa	EPI_ISL_515615	female	12	live	Pharyngeal swab
ZAF_990	South Africa	EPI_ISL_515733	male	37	live	Pharyngeal swab
ZAF_991	South Africa	EPI_ISL_515836	male	47	live	Pharyngeal swab
ZAF_992	South Africa	EPI_ISL_535396	female	25	live	Pharyngeal swab	Ilembe
ZAF_993	South Africa	EPI_ISL_509292	male	36	live	Pharyngeal swab	uThukela
ZAF_994	South Africa	EPI_ISL_660226	female	21	live	Pharyngeal swab	CE1
ZAF_995	South Africa	EPI_ISL_602638	female	8	live	Pharyngeal swab	Ilembe
ZAF_996	South Africa	EPI_ISL_635029	female	22	live	Pharyngeal swab
ZAF_997	South Africa	EPI_ISL_498059	female	21	live	Pharyngeal swab
ZAF_998	South Africa	EPI_ISL_482870	female	50	live	Pharyngeal swab
ZAF_999	South Africa	EPI_ISL_515630	male	38	live	Pharyngeal swab
TUN_1	Tunisia	EPI_ISL_707700	female	35	live	Pharyngeal swab
TUN_10	Tunisia	EPI_ISL_707698	male	30	live	Pharyngeal swab
TUN_11	Tunisia	EPI_ISL_710540	male	60	deceased	unknown
TUN_12	Tunisia	EPI_ISL_710534	female	33	released	Pharyngeal swab
TUN_13	Tunisia	EPI_ISL_634977	female	47	live	Pharyngeal swab
TUN_14	Tunisia	EPI_ISL_635060	male	41	live	Pharyngeal swab
TUN_15	Tunisia	EPI_ISL_654016	female	45	live	Pharyngeal swab
TUN_16	Tunisia	EPI_ISL_710541	male	37	released	unknown
TUN_17	Tunisia	EPI_ISL_707699	male	40	live	Pharyngeal swab
TUN_18	Tunisia	EPI_ISL_710537	female	31	released	Pharyngeal swab
TUN_19	Tunisia	EPI_ISL_710575	female	48	released	unknown
TUN_2	Tunisia	EPI_ISL_707791	male	60	live	Pharyngeal swab	first Tunisian case
TUN_20	Tunisia	EPI_ISL_654019	male	58	live	Pharyngeal swab
TUN_21	Tunisia	EPI_ISL_699657	female	33	live	Pharyngeal swab
TUN_23	Tunisia	EPI_ISL_635062	female	24	live	Pharyngeal swab
TUN_24	Tunisia	EPI_ISL_635059	male	29	live	Pharyngeal swab
TUN_25	Tunisia	EPI_ISL_707697	male	45	live	Pharyngeal swab
TUN_27	Tunisia	EPI_ISL_699656	male	1	live	Pharyngeal swab
TUN_28	Tunisia	EPI_ISL_654018	female	23	live	Pharyngeal swab
TUN_3	Tunisia	EPI_ISL_712060	male	28	released	unknown
TUN_4	Tunisia	EPI_ISL_654020	male	34	live	Pharyngeal swab
TUN_5	Tunisia	EPI_ISL_635061	female	40	live	Pharyngeal swab
TUN_6	Tunisia	EPI_ISL_654017	female	42	live	Pharyngeal swab
TUN_7	Tunisia	EPI_ISL_632310	female	39	live	Pharyngeal swab
TUN_8	Tunisia	EPI_ISL_699655	male	30	live	Pharyngeal swab
TUN_9	Tunisia	EPI_ISL_711057	female	50	released	unknown

## Sheet: Europe
Isolate/Country Code	Country	Accession	Gender	Age	Status	Specimen Source	Additional Information
AND_1	Andorra	EPI_ISL_539496	female	0.6	live	Pharyngeal swab
BEL_1	Austria	EPI_ISL_416470	female	12	released	Pharyngeal swab
AUT_7	Austria	EPI_ISL_419663	female	48	deceased	Lung tissue
AUT_4	Austria	EPI_ISL_437200	female	92	deceased	Lung tissue
AUT_3	Austria	EPI_ISL_437201	female	71	deceased	Pharyngeal swab
AUT_1	Austria	EPI_ISL_437202	female	93	deceased	Pharyngeal swab
AUT_6	Austria	EPI_ISL_437298	female	92	deceased	Pharyngeal swab
AUT_5	Austria	EPI_ISL_437301	female	80	deceased	Pharyngeal swab
AUT_8	Austria	EPI_ISL_437302	female	80	deceased	Pharyngeal swab
BEL_5	Austria	EPI_ISL_582128	female	39	home	Pharyngeal swab
AUT_2	Austria	EPI_ISL_653916	female	80	deceased	Lung tissue
AUT_9	Austria	EPI_ISL_419662	male	72	deceased	Sputum	Vienna, Austria
AUT_10	Austria	EPI_ISL_419664	male	77	deceased	Lung tissue	Vienna, Austria
AUT_5	Austria	EPI_ISL_437197	male	78	deceased	Pharyngeal swab	primary patient sample
AUT_1	Austria	EPI_ISL_437198	male	82	deceased	Lung tissue	primary patient sample
AUT_6	Austria	EPI_ISL_437199	male	78	deceased	Lung tissue	primary patient sample
AUT_2	Austria	EPI_ISL_437203	male	79	deceased	Pharyngeal swab	primary patient sample
AUT_4	Austria	EPI_ISL_437299	male	85	deceased	Lung tissue	primary patient sample
AUT_3	Austria	EPI_ISL_437300	male	77	deceased	Lung tissue	primary patient sample
AUT_7	Austria	EPI_ISL_437303	male	80	deceased	Pharyngeal swab	primary patient sample
AUT_8	Austria	EPI_ISL_485603	male	36	live	Lung tissue	Health care worker
BEL_2	Belgium	EPI_ISL_418644	female	64	live	Pharyngeal swab
BEL_4	Belgium	EPI_ISL_421186	female	80	live	unknown
BEL_3	Belgium	EPI_ISL_450724	female	79	home	Pharyngeal swab
BEL_2	Belgium	EPI_ISL_416469	male	45	live	Pharyngeal swab
BEL_6	Belgium	EPI_ISL_418643	male	71	live	Pharyngeal swab
BEL_4	Belgium	EPI_ISL_434372	male	32	live	unknown
BEL_5	Belgium	EPI_ISL_434375	male	67	home	unknown
BEL_1	Belgium	EPI_ISL_452140	male	55	deceased	Lung tissue
BEL_3	Belgium	EPI_ISL_582131	male	87	home	Pharyngeal swab
BIH_1	Bosnia and Herzegovina	EPI_ISL_462753	female	71	live	Pharyngeal swab
BIH_2	Bosnia and Herzegovina	EPI_ISL_462990	male	78	deceased	Pharyngeal swab
BIH_3	Bosnia and Herzegovina	EPI_ISL_463893	male	51	live	Pharyngeal swab
BIH_1	Bosnia and Herzegovina	EPI_ISL_467300	male	1	released	unknown
BGR_1	Bulgaria	EPI_ISL_480310	female	67	deceased	Pharyngeal swab
HRV_4	Croatia	EPI_ISL_454578	female	63	live	Pharyngeal swab
HRV_5	Croatia	EPI_ISL_454595	female	41	live	Pharyngeal swab
HRV_3	Croatia	EPI_ISL_454605	female	61	live	Pharyngeal swab
HRV_2	Croatia	EPI_ISL_454606	female	60	live	unknown
HRV_1	Croatia	EPI_ISL_468656	female	31	live	unknown
HRV_9	Croatia	EPI_ISL_451934	male	61	live	Pharyngeal swab
HRV_1	Croatia	EPI_ISL_454574	male	36	live	Pharyngeal swab
HRV_5	Croatia	EPI_ISL_454581	male	85	live	Pharyngeal swab
HRV_10	Croatia	EPI_ISL_454583	male	25	live	Pharyngeal swab
HRV_6	Croatia	EPI_ISL_454588	male	58	live	Pharyngeal swab
HRV_8	Croatia	EPI_ISL_454592	male	61	live	Pharyngeal swab
HRV_3	Croatia	EPI_ISL_454602	male	68	asymptomatic	Pharyngeal swab
HRV_2	Croatia	EPI_ISL_455566	male	51	live	Pharyngeal swab
HRV_7	Croatia	EPI_ISL_455567	male	58	live	unknown
HRV_4	Croatia	EPI_ISL_468591	male	57	live	unknown
CYP_1	Cyprus	EPI_ISL_463741	female	36	recovered	Pharyngeal swab
CYP_2	Cyprus	EPI_ISL_463743	female	40	recovered	Pharyngeal swab
CYP_3	Cyprus	EPI_ISL_463745	female	51	recovered	Pharyngeal swab
CYP_4	Cyprus	EPI_ISL_463746	female	39	recovered	Pharyngeal swab
CYP_3	Cyprus	EPI_ISL_463742	male	53	recovered	Pharyngeal swab
CYP_2	Cyprus	EPI_ISL_463744	male	74	recovered	Pharyngeal swab
CYP_1	Cyprus	EPI_ISL_463747	male	33	recovered	Pharyngeal swab
CYP_4	Cyprus	EPI_ISL_463748	male	61	recovered	Pharyngeal swab
CZE_52	Czech Republic	EPI_ISL_422636	female	43	live	Pharyngeal swab
CZE_58	Czech Republic	EPI_ISL_434572	female	66	mild	Pharyngeal swab
CZE_30	Czech Republic	EPI_ISL_471544	female	60	mild	Pharyngeal swab
CZE_62	Czech Republic	EPI_ISL_471555	female	52	mild	Pharyngeal swab
CZE_80	Czech Republic	EPI_ISL_489708	female	72	asymptomatic	Pharyngeal swab
CZE_49	Czech Republic	EPI_ISL_489709	female	74	mild	Pharyngeal swab
CZE_46	Czech Republic	EPI_ISL_490112	female	42	mild	Pharyngeal swab
CZE_37	Czech Republic	EPI_ISL_491094	female	52	mild	Pharyngeal swab
CZE_67	Czech Republic	EPI_ISL_513314	female	50	live	Pharyngeal swab
CZE_13	Czech Republic	EPI_ISL_513512	female	88	mild	Pharyngeal swab
CZE_40	Czech Republic	EPI_ISL_530347	female	11	mild	Pharyngeal swab
CZE_3	Czech Republic	EPI_ISL_539776	female	57	live	Pharyngeal swab
CZE_7	Czech Republic	EPI_ISL_539779	female	44	mild	Pharyngeal swab
CZE_26	Czech Republic	EPI_ISL_541082	female	37	mild	Pharyngeal swab
CZE_76	Czech Republic	EPI_ISL_541335	female	34	mild	Pharyngeal swab
CZE_8	Czech Republic	EPI_ISL_541336	female	53	mild	Pharyngeal swab
CZE_20	Czech Republic	EPI_ISL_541337	female	66	asymptomatic	Pharyngeal swab
CZE_74	Czech Republic	EPI_ISL_545580	female	16	mild	Pharyngeal swab
CZE_17	Czech Republic	EPI_ISL_545957	female	46	mild	Pharyngeal swab
CZE_35	Czech Republic	EPI_ISL_546935	female	45	mild	Pharyngeal swab
CZE_4	Czech Republic	EPI_ISL_546936	female	33	mild	Pharyngeal swab
CZE_55	Czech Republic	EPI_ISL_547966	female	64	mild	Pharyngeal swab
CZE_14	Czech Republic	EPI_ISL_547968	female	45	mild	Pharyngeal swab
CZE_57	Czech Republic	EPI_ISL_577630	female	60	asymptomatic	Pharyngeal swab
CZE_5	Czech Republic	EPI_ISL_577631	female	46	mild	Pharyngeal swab	McDonald Cínovecká, Praha 8;
CZE_53	Czech Republic	EPI_ISL_577632	female	67	asymptomatic	Pharyngeal swab	McDonald, Praha 8;
CZE_15	Czech Republic	EPI_ISL_577634	female	24	mild	Pharyngeal swab
CZE_36	Czech Republic	EPI_ISL_584073	female	66	live	Pharyngeal swab
CZE_56	Czech Republic	EPI_ISL_584074	female	41	mild	Pharyngeal swab	Industrial Enterprises in Liberec;
CZE_43	Czech Republic	EPI_ISL_584075	female	13	asymptomatic	Pharyngeal swab	import from Ukraine;
CZE_24	Czech Republic	EPI_ISL_584076	female	40	mild	Pharyngeal swab	Industrial Enterprises in Liberec;
CZE_64	Czech Republic	EPI_ISL_584078	female	91	live	Pharyngeal swab	alzheimer home, Prague 4 ;
CZE_18	Czech Republic	EPI_ISL_584079	female	44	mild	Pharyngeal swab
CZE_51	Czech Republic	EPI_ISL_584080	female	54	mild	Pharyngeal swab
CZE_66	Czech Republic	EPI_ISL_626570	female	28	mild	Pharyngeal swab
CZE_82	Czech Republic	EPI_ISL_626575	female	49	mild	Pharyngeal swab
CZE_39	Czech Republic	EPI_ISL_626577	female	34	asymptomatic	Pharyngeal swab
CZE_72	Czech Republic	EPI_ISL_626578	female	31	mild	Pharyngeal swab
CZE_71	Czech Republic	EPI_ISL_626586	female	34	asymptomatic	Pharyngeal swab
CZE_75	Czech Republic	EPI_ISL_626587	female	46	mild	Pharyngeal swab
CZE_23	Czech Republic	EPI_ISL_626591	female	52	mild	Pharyngeal swab
CZE_29	Czech Republic	EPI_ISL_626593	female	45	mild	Pharyngeal swab
CZE_31	Czech Republic	EPI_ISL_626594	female	60	asymptomatic	Pharyngeal swab
CZE_78	Czech Republic	EPI_ISL_626595	female	21	asymptomatic	Pharyngeal swab
CZE_21	Czech Republic	EPI_ISL_626596	female	19	asymptomatic	Pharyngeal swab
CZE_45	Czech Republic	EPI_ISL_626597	female	33	mild	Pharyngeal swab
CZE_16	Czech Republic	EPI_ISL_626598	female	84	live	Pharyngeal swab
CZE_6	Czech Republic	EPI_ISL_626599	female	88	deceased	Pharyngeal swab	Cluster Retirement Home Dobrá Voda
CZE_2	Czech Republic	EPI_ISL_626600	female	78	asymptomatic	Pharyngeal swab	Cluster Retirement Home Dobrá Voda
CZE_42	Czech Republic	EPI_ISL_626601	female	79	asymptomatic	Pharyngeal swab	Cluster Retirement Home Dobrá Voda
CZE_47	Czech Republic	EPI_ISL_626602	female	42	mild	Pharyngeal swab
CZE_68	Czech Republic	EPI_ISL_626603	female	13	asymptomatic	Pharyngeal swab
CZE_34	Czech Republic	EPI_ISL_626604	female	55	asymptomatic	Pharyngeal swab
CZE_54	Czech Republic	EPI_ISL_626608	female	39	mild	Pharyngeal swab
CZE_84	Czech Republic	EPI_ISL_626609	female	72	mild	Pharyngeal swab
CZE_61	Czech Republic	EPI_ISL_626612	female	53	mild	Pharyngeal swab
CZE_86	Czech Republic	EPI_ISL_626613	female	48	mild	Pharyngeal swab
CZE_12	Czech Republic	EPI_ISL_626616	female	48	mild	Pharyngeal swab
CZE_11	Czech Republic	EPI_ISL_626617	female	68	mild	Pharyngeal swab
CZE_63	Czech Republic	EPI_ISL_626619	female	76	deceased	Lung tissue	Retirement Home Benátky nad Jizerou
CZE_73	Czech Republic	EPI_ISL_660553	female	89	deceased	Pharyngeal swab	Retirement Home Bassova
CZE_65	Czech Republic	EPI_ISL_660554	female	76	deceased	Pharyngeal swab
CZE_77	Czech Republic	EPI_ISL_660555	female	70	deceased	Lung tissue
CZE_22	Czech Republic	EPI_ISL_660557	female	86	live	Pharyngeal swab
CZE_59	Czech Republic	EPI_ISL_660560	female	32	mild	Pharyngeal swab
CZE_50	Czech Republic	EPI_ISL_660561	female	16	mild	Pharyngeal swab
CZE_79	Czech Republic	EPI_ISL_660562	female	33	mild	Pharyngeal swab
CZE_41	Czech Republic	EPI_ISL_660563	female	35	mild	Pharyngeal swab
CZE_44	Czech Republic	EPI_ISL_660564	female	21	mild	Pharyngeal swab
CZE_81	Czech Republic	EPI_ISL_660565	female	50	mild	Pharyngeal swab
CZE_38	Czech Republic	EPI_ISL_660566	female	35	mild	Pharyngeal swab
CZE_27	Czech Republic	EPI_ISL_660567	female	46	mild	Pharyngeal swab
CZE_70	Czech Republic	EPI_ISL_660571	female	49	asymptomatic	Pharyngeal swab
CZE_33	Czech Republic	EPI_ISL_660573	female	34	asymptomatic	Pharyngeal swab
CZE_1	Czech Republic	EPI_ISL_693660	female	61	mild	Pharyngeal swab
CZE_60	Czech Republic	EPI_ISL_693661	female	43	mild	Pharyngeal swab
CZE_19	Czech Republic	EPI_ISL_693662	female	45	asymptomatic	Pharyngeal swab
CZE_32	Czech Republic	EPI_ISL_693663	female	35	mild	Pharyngeal swab
CZE_28	Czech Republic	EPI_ISL_693665	female	75	live	Pharyngeal swab
CZE_69	Czech Republic	EPI_ISL_693666	female	61	deceased	Pharyngeal swab
CZE_25	Czech Republic	EPI_ISL_693667	female	37	mild	Pharyngeal swab
CZE_85	Czech Republic	EPI_ISL_693675	female	73	deceased	Pharyngeal swab
CZE_48	Czech Republic	EPI_ISL_693677	female	49	asymptomatic	Pharyngeal swab
CZE_83	Czech Republic	EPI_ISL_693681	female	56	mild	Pharyngeal swab
CZE_10	Czech Republic	EPI_ISL_693682	female	50	mild	Pharyngeal swab
CZE_9	Czech Republic	EPI_ISL_693684	female	81	live	Pharyngeal swab
CZE_56	Czech Republic	EPI_ISL_414477	male	44	live	Pharyngeal swab
CZE_6	Czech Republic	EPI_ISL_471528	male	11	mild	Pharyngeal swab	Italy skiing with family in Trentino Vigo di Fassa 22-29. February, in contact with previously positive family member
CZE_37	Czech Republic	EPI_ISL_471530	male	58	mild	Pharyngeal swab	01.03.-07.03.2020 skiing in Madona di Campiglio
CZE_75	Czech Republic	EPI_ISL_471540	male	73	mild	Pharyngeal swab	Large oputbreak in a small village after dancing fest Kynice outbreak
CZE_22	Czech Republic	EPI_ISL_471547	male	67	mild	Pharyngeal swab
CZE_80	Czech Republic	EPI_ISL_471550	male	20	mild	Pharyngeal swab
CZE_34	Czech Republic	EPI_ISL_471553	male	48	mild	Pharyngeal swab
CZE_77	Czech Republic	EPI_ISL_476067	male	36	live	Pharyngeal swab
CZE_7	Czech Republic	EPI_ISL_491092	male	19	mild	Pharyngeal swab	neogenetic single kindey
CZE_39	Czech Republic	EPI_ISL_491093	male	45	mild	Pharyngeal swab	Import Italy, Sondrio, Madesimo 29.2.-.6.3.
CZE_29	Czech Republic	EPI_ISL_491095	male	32	mild	Pharyngeal swab
CZE_72	Czech Republic	EPI_ISL_491117	male	43	mild	Pharyngeal swab
CZE_42	Czech Republic	EPI_ISL_491118	male	47	mild	Pharyngeal swab
CZE_20	Czech Republic	EPI_ISL_513511	male	29	mild	Pharyngeal swab
CZE_83	Czech Republic	EPI_ISL_530348	male	38	asymptomatic	Pharyngeal swab
CZE_66	Czech Republic	EPI_ISL_530349	male	70	live	Pharyngeal swab
CZE_28	Czech Republic	EPI_ISL_530350	male	31	mild	Pharyngeal swab	Putative import from Switzerland, Fils
CZE_5	Czech Republic	EPI_ISL_539493	male	60	mild	Pharyngeal swab
CZE_9	Czech Republic	EPI_ISL_539494	male	56	live	Pharyngeal swab
CZE_24	Czech Republic	EPI_ISL_539777	male	67	asymptomatic	Pharyngeal swab
CZE_8	Czech Republic	EPI_ISL_539780	male	63	mild	Pharyngeal swab
CZE_67	Czech Republic	EPI_ISL_539781	male	20	mild	Pharyngeal swab
CZE_62	Czech Republic	EPI_ISL_539782	male	58	mild	Pharyngeal swab	OKD Darkov
CZE_1	Czech Republic	EPI_ISL_541138	male	69	mild	Pharyngeal swab	Import from Austria, Salzburg - Bad Gastein hotel HAAS
CZE_73	Czech Republic	EPI_ISL_541332	male	42	mild	Pharyngeal swab	OKD Darkov
CZE_86	Czech Republic	EPI_ISL_541333	male	36	asymptomatic	Pharyngeal swab	OKD Darkov
CZE_2	Czech Republic	EPI_ISL_541334	male	51	mild	Pharyngeal swab
CZE_58	Czech Republic	EPI_ISL_545954	male	42	mild	Pharyngeal swab
CZE_13	Czech Republic	EPI_ISL_545956	male	77	mild	Pharyngeal swab
CZE_76	Czech Republic	EPI_ISL_546436	male	12	mild	Pharyngeal swab
CZE_38	Czech Republic	EPI_ISL_547967	male	64	mild	Pharyngeal swab	Husband of hCoV-19/Czech Republic/NRL_8118-3/2020
CZE_32	Czech Republic	EPI_ISL_560408	male	33	mild	Pharyngeal swab	15/7 - 19/7 accommodation in a private cottage, contact with a positive
CZE_52	Czech Republic	EPI_ISL_560409	male	31	mild	Pharyngeal swab	15/7 - 19/7 accommodation in a private cottage, contact with a positive: Distorted ability to smell
CZE_36	Czech Republic	EPI_ISL_560410	male	33	mild	Pharyngeal swab	15/7 - 19/7 accommodation in a private cottage, contact with a positive
CZE_63	Czech Republic	EPI_ISL_560411	male	30	mild	Pharyngeal swab	15/7 - 19/7 accommodation in a private cottage, contact with a positive
CZE_15	Czech Republic	EPI_ISL_560412	male	34	mild	Pharyngeal swab	15/7 - 19/7 accommodation in a private cottage, contact with a positive
CZE_17	Czech Republic	EPI_ISL_568577	male	69	mild	Pharyngeal swab	Outbreak in Ministry of Health
CZE_23	Czech Republic	EPI_ISL_577624	male	46	mild	Pharyngeal swab
CZE_71	Czech Republic	EPI_ISL_577625	male	12	asymptomatic	Pharyngeal swab	13.7.-17.7. Sport Camp Eden, Prague 10
CZE_31	Czech Republic	EPI_ISL_577626	male	26	asymptomatic	Pharyngeal swab	return from Ukraine
CZE_26	Czech Republic	EPI_ISL_577627	male	15	asymptomatic	Pharyngeal swab
CZE_46	Czech Republic	EPI_ISL_577628	male	49	asymptomatic	Pharyngeal swab
CZE_60	Czech Republic	EPI_ISL_577629	male	89	deceased	Pharyngeal swab
CZE_55	Czech Republic	EPI_ISL_577633	male	46	mild	Pharyngeal swab
CZE_69	Czech Republic	EPI_ISL_577635	male	28	asymptomatic	Pharyngeal swab	Import from Ukraine
CZE_35	Czech Republic	EPI_ISL_577636	male	37	mild	Pharyngeal swab	Import from Slovakia
CZE_59	Czech Republic	EPI_ISL_577637	male	38	mild	Pharyngeal swab
CZE_49	Czech Republic	EPI_ISL_577638	male	33	mild	Pharyngeal swab
CZE_50	Czech Republic	EPI_ISL_584077	male	67	asymptomatic	Pharyngeal swab	Industrial Enterprises in Liberec
CZE_11	Czech Republic	EPI_ISL_584082	male	62	asymptomatic	Pharyngeal swab
CZE_68	Czech Republic	EPI_ISL_626571	male	19	mild	Pharyngeal swab	University "freshman" camp in Doksy 3-8.9.2020 and 8.9.-13.9.2020
CZE_45	Czech Republic	EPI_ISL_626572	male	74	live	Pharyngeal swab
CZE_27	Czech Republic	EPI_ISL_626573	male	32	mild	Pharyngeal swab
CZE_3	Czech Republic	EPI_ISL_626579	male	31	mild	Pharyngeal swab
CZE_87	Czech Republic	EPI_ISL_626580	male	34	mild	Pharyngeal swab
CZE_79	Czech Republic	EPI_ISL_626581	male	37	mild	Pharyngeal swab
CZE_30	Czech Republic	EPI_ISL_626582	male	21	mild	Pharyngeal swab
CZE_47	Czech Republic	EPI_ISL_626583	male	61	mild	Pharyngeal swab
CZE_21	Czech Republic	EPI_ISL_626585	male	20	mild	Pharyngeal swab
CZE_65	Czech Republic	EPI_ISL_626588	male	36	mild	Pharyngeal swab
CZE_19	Czech Republic	EPI_ISL_626590	male	46	mild	Pharyngeal swab
CZE_48	Czech Republic	EPI_ISL_626592	male	16	mild	Pharyngeal swab
CZE_53	Czech Republic	EPI_ISL_626605	male	27	deceased	Lung tissue
CZE_10	Czech Republic	EPI_ISL_626606	male	20	mild	Pharyngeal swab
CZE_74	Czech Republic	EPI_ISL_626614	male	55	mild	Pharyngeal swab
CZE_64	Czech Republic	EPI_ISL_626615	male	23	asymptomatic	Pharyngeal swab
CZE_70	Czech Republic	EPI_ISL_626618	male	25	asymptomatic	Pharyngeal swab
CZE_16	Czech Republic	EPI_ISL_626620	male	64	deceased	Pharyngeal swab	Same as hCoV-19/Czech Republic/NRL_9894/2020
CZE_78	Czech Republic	EPI_ISL_626621	male	64	deceased	Lung tissue	Same as hCoV-19/Czech Republic/NRL_9893/2020
CZE_61	Czech Republic	EPI_ISL_626623	male	62	mild	Pharyngeal swab	Diarrhoea
CZE_41	Czech Republic	EPI_ISL_626624	male	41	unknown	Pharyngeal swab
CZE_40	Czech Republic	EPI_ISL_626625	male	60	asymptomatic	Pharyngeal swab
CZE_44	Czech Republic	EPI_ISL_660556	male	75	live	Pharyngeal swab	cluster Nursing Home Vojkov
CZE_18	Czech Republic	EPI_ISL_660558	male	56	live	Pharyngeal swab	cluster HEUNISCH Brno
CZE_43	Czech Republic	EPI_ISL_660559	male	44	mild	Pharyngeal swab
CZE_51	Czech Republic	EPI_ISL_660568	male	51	mild	Pharyngeal swab
CZE_33	Czech Republic	EPI_ISL_660569	male	76	asymptomatic	Pharyngeal swab	cluster Nursing Home Vojkov
CZE_4	Czech Republic	EPI_ISL_660570	male	40	asymptomatic	Pharyngeal swab
CZE_82	Czech Republic	EPI_ISL_660572	male	57	asymptomatic	Pharyngeal swab
CZE_14	Czech Republic	EPI_ISL_693669	male	75	deceased	Lung tissue
CZE_25	Czech Republic	EPI_ISL_693672	male	60	deceased	Pharyngeal swab
CZE_81	Czech Republic	EPI_ISL_693674	male	39	mild	Pharyngeal swab
CZE_85	Czech Republic	EPI_ISL_693678	male	23	mild	Pharyngeal swab
CZE_12	Czech Republic	EPI_ISL_693679	male	51	mild	Pharyngeal swab
CZE_57	Czech Republic	EPI_ISL_693683	male	69	deceased	Lung tissue
CZE_84	Czech Republic	EPI_ISL_693685	male	74	deceased	Pharyngeal swab
CZE_54	Czech Republic	EPI_ISL_693687	male	69	deceased	Lung tissue
DNK_3	Denmark	EPI_ISL_416142	male	45	released	Pharyngeal swab
DNK_2	Denmark	EPI_ISL_416143	male	54	released	Pharyngeal swab
DNK_1	Denmark	EPI_ISL_416144	male	14	released	unknown
FRO_4	Faroe Islands	EPI_ISL_526937	female	22	recovered	Pharyngeal swab
FRO_3	Faroe Islands	EPI_ISL_526940	female	43	recovered	Pharyngeal swab
FRO_2	Faroe Islands	EPI_ISL_526942	female	22	recovered	Pharyngeal swab
FRO_7	Faroe Islands	EPI_ISL_526944	female	46	recovered	Pharyngeal swab
FRO_5	Faroe Islands	EPI_ISL_526946	female	57	recovered	Pharyngeal swab
FRO_6	Faroe Islands	EPI_ISL_526947	female	41	recovered	Pharyngeal swab
FRO_1	Faroe Islands	EPI_ISL_614311	female	25	recovered	Pharyngeal swab
FRO_6	Faroe Islands	EPI_ISL_526935	male	50	recovered	Pharyngeal swab
FRO_4	Faroe Islands	EPI_ISL_526938	male	40	recovered	Pharyngeal swab
FRO_2	Faroe Islands	EPI_ISL_526939	male	20	recovered	Pharyngeal swab
FRO_3	Faroe Islands	EPI_ISL_526941	male	55	recovered	Pharyngeal swab
FRO_5	Faroe Islands	EPI_ISL_526943	male	51	recovered	Pharyngeal swab
FRO_1	Faroe Islands	EPI_ISL_526945	male	46	recovered	Pharyngeal swab
FRO_7	Faroe Islands	EPI_ISL_526948	male	56	recovered	Pharyngeal swab
FIN_2	Finland	EPI_ISL_407079	female	32	live	Pharyngeal swab
FIN_1	Finland	EPI_ISL_412971	female	24	live	Pharyngeal swab
FRA_23	France	EPI_ISL_408430	female	47	live	Pharyngeal swab
FRA_46	France	EPI_ISL_411218	female	47	live	Pharyngeal swab
FRA_3	France	EPI_ISL_414625	female	59	live	unknown
FRA_19	France	EPI_ISL_417339	female	86	live	Pharyngeal swab
FRA_53	France	EPI_ISL_418222	female	73	live	Pharyngeal swab
FRA_21	France	EPI_ISL_418229	female	54	live	Pharyngeal swab
FRA_28	France	EPI_ISL_418231	female	79	live	Pharyngeal swab
FRA_42	France	EPI_ISL_418234	female	31	live	Pharyngeal swab
FRA_52	France	EPI_ISL_418236	female	88	live	Lung tissue
FRA_38	France	EPI_ISL_418238	female	72	live	Pharyngeal swab
FRA_32	France	EPI_ISL_420039	female	87	home	Pharyngeal swab
FRA_13	France	EPI_ISL_420042	female	47	live	Pharyngeal swab
FRA_39	France	EPI_ISL_420046	female	92	home	Pharyngeal swab
FRA_49	France	EPI_ISL_420052	female	58	home	Pharyngeal swab
FRA_30	France	EPI_ISL_420060	female	23	live	unknown
FRA_35	France	EPI_ISL_421504	female	46	live	Pharyngeal swab
FRA_11	France	EPI_ISL_421508	female	98	home	Pharyngeal swab
FRA_7	France	EPI_ISL_421509	female	50	live	Pharyngeal swab
FRA_12	France	EPI_ISL_428358	female	92	live	Pharyngeal swab
FRA_2	France	EPI_ISL_428362	female	40	live	Pharyngeal swab
FRA_6	France	EPI_ISL_428366	female	28	live	Pharyngeal swab
FRA_1	France	EPI_ISL_443267	female	25	live	Pharyngeal swab
FRA_51	France	EPI_ISL_443272	female	78	live	Pharyngeal swab
FRA_48	France	EPI_ISL_443274	female	52	live	Pharyngeal swab
FRA_18	France	EPI_ISL_443276	female	40	live	Pharyngeal swab
FRA_22	France	EPI_ISL_443280	female	25	live	Pharyngeal swab
FRA_50	France	EPI_ISL_443281	female	25	live	Pharyngeal swab
FRA_4	France	EPI_ISL_443284	female	91	live	unknown
FRA_10	France	EPI_ISL_443287	female	29	live	unknown
FRA_24	France	EPI_ISL_443289	female	35	live	Sputum
FRA_43	France	EPI_ISL_443290	female	84	live	Pharyngeal swab
FRA_36	France	EPI_ISL_443291	female	86	live	Pharyngeal swab
FRA_41	France	EPI_ISL_443303	female	29	home	Pharyngeal swab
FRA_14	France	EPI_ISL_443304	female	78	home	Pharyngeal swab
FRA_45	France	EPI_ISL_443307	female	90	home	Pharyngeal swab
FRA_20	France	EPI_ISL_443309	female	76	live	Pharyngeal swab
FRA_44	France	EPI_ISL_443314	female	85	live	Pharyngeal swab
FRA_33	France	EPI_ISL_560593	female	86	live	unknown
FRA_47	France	EPI_ISL_560619	female	72	live	unknown
FRA_9	France	EPI_ISL_560625	female	83	live	unknown
FRA_15	France	EPI_ISL_593909	female	34	home	unknown
FRA_29	France	EPI_ISL_593912	female	22	live	unknown
FRA_27	France	EPI_ISL_593915	female	22	live	unknown
FRA_40	France	EPI_ISL_593926	female	66	home	unknown
FRA_17	France	EPI_ISL_593928	female	54	home	unknown
FRA_5	France	EPI_ISL_593930	female	46	home	unknown
FRA_8	France	EPI_ISL_614273	female	29	home	unknown
FRA_26	France	EPI_ISL_614281	female	80	live	Pharyngeal swab
FRA_31	France	EPI_ISL_614283	female	52	home	Pharyngeal swab
FRA_37	France	EPI_ISL_614286	female	45	home	Pharyngeal swab
FRA_25	France	EPI_ISL_614292	female	76	home	Pharyngeal swab
FRA_16	France	EPI_ISL_693765	female	46	live	unknown
FRA_34	France	EPI_ISL_693773	female	20	home	Pharyngeal swab
FRA_45	France	EPI_ISL_414623	male	36	live	Sputum
FRA_72	France	EPI_ISL_414627	male	78	live	Pharyngeal swab
FRA_22	France	EPI_ISL_414628	male	82	live	Pharyngeal swab
FRA_50	France	EPI_ISL_414629	male	88	live	Pharyngeal swab
FRA_44	France	EPI_ISL_414630	male	65	live	Pharyngeal swab
FRA_48	France	EPI_ISL_414631	male	88	live	Pharyngeal swab
FRA_40	France	EPI_ISL_414632	male	70	live	Pharyngeal swab
FRA_56	France	EPI_ISL_414633	male	86	live	Pharyngeal swab
FRA_65	France	EPI_ISL_414634	male	60	live	Sputum
FRA_57	France	EPI_ISL_414636	male	95	live	Pharyngeal swab
FRA_52	France	EPI_ISL_414637	male	68	live	Pharyngeal swab
FRA_20	France	EPI_ISL_415650	male	40	live	Pharyngeal swab
FRA_27	France	EPI_ISL_415652	male	86	home	Pharyngeal swab
FRA_37	France	EPI_ISL_416495	male	70	live	Pharyngeal swab
FRA_59	France	EPI_ISL_416497	male	93	live	Pharyngeal swab
FRA_35	France	EPI_ISL_416499	male	81	live	Pharyngeal swab
FRA_63	France	EPI_ISL_416501	male	56	live	Pharyngeal swab
FRA_7	France	EPI_ISL_417335	male	74	live	Pharyngeal swab
FRA_42	France	EPI_ISL_417337	male	78	live	Pharyngeal swab
FRA_16	France	EPI_ISL_418219	male	73	live	unknown
FRA_49	France	EPI_ISL_418227	male	91	live	Sputum
FRA_54	France	EPI_ISL_418237	male	69	live	Pharyngeal swab
FRA_68	France	EPI_ISL_418240	male	83	live	Pharyngeal swab
FRA_6	France	EPI_ISL_420044	male	87	live	Pharyngeal swab
FRA_2	France	EPI_ISL_420048	male	32	live	Pharyngeal swab
FRA_69	France	EPI_ISL_420050	male	83	live	Pharyngeal swab
FRA_23	France	EPI_ISL_421502	male	90	home	Pharyngeal swab
FRA_67	France	EPI_ISL_421503	male	90	home	Pharyngeal swab
FRA_13	France	EPI_ISL_421513	male	78	live	Pharyngeal swab
FRA_15	France	EPI_ISL_428354	male	71	live	Sputum
FRA_34	France	EPI_ISL_428356	male	71	live	Lung tissue
FRA_3	France	EPI_ISL_428359	male	66	live	Pharyngeal swab
FRA_62	France	EPI_ISL_428363	male	49	live	Pharyngeal swab
FRA_60	France	EPI_ISL_430846	male	80	deceased	Brain tissue
FRA_24	France	EPI_ISL_443265	male	57	live	Pharyngeal swab
FRA_64	France	EPI_ISL_443283	male	92	live	Pharyngeal swab
FRA_14	France	EPI_ISL_443296	male	0	live	unknown
FRA_1	France	EPI_ISL_443298	male	9	live	unknown
FRA_55	France	EPI_ISL_443305	male	25	live	Pharyngeal swab
FRA_19	France	EPI_ISL_469283	male	64	live	Pharyngeal swab
FRA_39	France	EPI_ISL_469284	male	53	live	Pharyngeal swab
FRA_43	France	EPI_ISL_560591	male	57	live	unknown
FRA_38	France	EPI_ISL_560594	male	67	live	unknown
FRA_76	France	EPI_ISL_560597	male	67	live	unknown
FRA_9	France	EPI_ISL_560623	male	70	live	unknown
FRA_77	France	EPI_ISL_560627	male	52	live	unknown
FRA_41	France	EPI_ISL_560629	male	88	live	unknown
FRA_28	France	EPI_ISL_560631	male	71	live	unknown
FRA_30	France	EPI_ISL_560632	male	69	live	unknown
FRA_51	France	EPI_ISL_560633	male	40	live	unknown
FRA_47	France	EPI_ISL_560635	male	94	live	unknown
FRA_46	France	EPI_ISL_560644	male	65	live	unknown
FRA_61	France	EPI_ISL_593902	male	27	home	unknown
FRA_29	France	EPI_ISL_593905	male	67	home	unknown
FRA_78	France	EPI_ISL_593906	male	55	home	unknown
FRA_58	France	EPI_ISL_593908	male	36	home	unknown
FRA_33	France	EPI_ISL_593913	male	23	live	unknown
FRA_36	France	EPI_ISL_593914	male	35	live	unknown
FRA_53	France	EPI_ISL_593920	male	21	live	unknown
FRA_70	France	EPI_ISL_593924	male	26	home	unknown
FRA_5	France	EPI_ISL_593927	male	63	home	unknown
FRA_75	France	EPI_ISL_593932	male	24	home	unknown
FRA_66	France	EPI_ISL_594164	male	27	live	unknown
FRA_4	France	EPI_ISL_614265	male	34	home	unknown
FRA_21	France	EPI_ISL_614269	male	53	home	unknown
FRA_31	France	EPI_ISL_614274	male	36	home	unknown
FRA_17	France	EPI_ISL_614275	male	21	home	unknown
FRA_71	France	EPI_ISL_614288	male	39	home	Pharyngeal swab
FRA_25	France	EPI_ISL_614289	male	42	home	Pharyngeal swab
FRA_12	France	EPI_ISL_614291	male	49	home	Pharyngeal swab
FRA_74	France	EPI_ISL_636476	male	99	deceased	Pharyngeal swab
FRA_18	France	EPI_ISL_660323	male	41	live	Lung tissue
FRA_26	France	EPI_ISL_693762	male	88	live	unknown
FRA_10	France	EPI_ISL_693766	male	20	home	Pharyngeal swab
FRA_73	France	EPI_ISL_693769	male	10	home	Pharyngeal swab
FRA_8	France	EPI_ISL_693772	male	56	home	Pharyngeal swab
FRA_32	France	EPI_ISL_693774	male	26	home	Pharyngeal swab
FRA_11	France	EPI_ISL_700371	male	75	deceased	unknown
GEO_1	Georgia	EPI_ISL_415641	female	31	live	Pharyngeal swab
GEO_1	Georgia	EPI_ISL_415642	male	59	live	Pharyngeal swab
GEO_3	Georgia	EPI_ISL_415643	male	33	live	Pharyngeal swab
GEO_2	Georgia	EPI_ISL_415644	male	51	live	Pharyngeal swab
DEU_10	Germany	EPI_ISL_414520	female	40	live	Sputum
DEU_3	Germany	EPI_ISL_414521	female	38	live	Pharyngeal swab
DEU_1	Germany	EPI_ISL_452218	female	44	released	Pharyngeal swab
DEU_8	Germany	EPI_ISL_452219	female	30	released	Pharyngeal swab
DEU_9	Germany	EPI_ISL_457750	female	35	released	Pharyngeal swab
DEU_4	Germany	EPI_ISL_459963	female	32	released	unknown
DEU_5	Germany	EPI_ISL_459964	female	25	released	unknown
DEU_7	Germany	EPI_ISL_572330	female	25	live	Pharyngeal swab
DEU_6	Germany	EPI_ISL_573152	female	25	live	Pharyngeal swab
DEU_2	Germany	EPI_ISL_574259	female	25	live	Pharyngeal swab	Patient with severe combined immunodeficiency SCID
DEU_2	Germany	EPI_ISL_452222	male	27	released	Pharyngeal swab	Traveled from Italy
DEU_1	Germany	EPI_ISL_459962	male	35	released	Pharyngeal swab
GRC_4	Greece	EPI_ISL_476836	female	40	live	unknown
GRC_1	Greece	EPI_ISL_476837	female	44	live	unknown
GRC_6	Greece	EPI_ISL_476839	female	78	live	unknown
GRC_13	Greece	EPI_ISL_476841	female	54	live	unknown
GRC_10	Greece	EPI_ISL_476845	female	54	live	unknown
GRC_7	Greece	EPI_ISL_476847	female	49	live	unknown
GRC_2	Greece	EPI_ISL_487379	female	90	released	Pharyngeal swab
GRC_8	Greece	EPI_ISL_501230	female	79	live	Pharyngeal swab
GRC_3	Greece	EPI_ISL_501232	female	36	released	Pharyngeal swab
GRC_5	Greece	EPI_ISL_501233	female	60	live	Pharyngeal swab
GRC_9	Greece	EPI_ISL_501234	female	88	live	Pharyngeal swab
GRC_12	Greece	EPI_ISL_501237	female	90	live	Pharyngeal swab
GRC_11	Greece	EPI_ISL_501238	female	73	live	Pharyngeal swab
GRC_7	Greece	EPI_ISL_430469	male	62	released	unknown
GRC_5	Greece	EPI_ISL_451310	male	48	released	Pharyngeal swab
GRC_9	Greece	EPI_ISL_451311	male	71	live	Pharyngeal swab
GRC_11	Greece	EPI_ISL_476835	male	45	live	unknown
GRC_1	Greece	EPI_ISL_476838	male	49	live	unknown
GRC_13	Greece	EPI_ISL_476843	male	69	live	unknown
GRC_15	Greece	EPI_ISL_476851	male	50	live	unknown
GRC_14	Greece	EPI_ISL_487370	male	53	live	Pharyngeal swab
GRC_3	Greece	EPI_ISL_487377	male	65	released	Pharyngeal swab
GRC_6	Greece	EPI_ISL_487381	male	28	released	Pharyngeal swab
GRC_4	Greece	EPI_ISL_501231	male	41	released	Pharyngeal swab
GRC_12	Greece	EPI_ISL_501235	male	53	live	Pharyngeal swab
GRC_10	Greece	EPI_ISL_501241	male	32	released	Pharyngeal swab
GRC_8	Greece	EPI_ISL_501246	male	66	released	Pharyngeal swab
GRC_2	Greece	EPI_ISL_501248	male	72	live	unknown
GRC_16	Greece	EPI_ISL_501249	male	31	released	Pharyngeal swab
GRC_17	Greece	EPI_ISL_501250	male	69	live	Pharyngeal swab
HUN_43	Hungary	EPI_ISL_435405	female	42	live	Pharyngeal swab
HUN_29	Hungary	EPI_ISL_435424	female	36	live	Pharyngeal swab
HUN_8	Hungary	EPI_ISL_526215	female	83	live	Pharyngeal swab
HUN_20	Hungary	EPI_ISL_526218	female	74	live	Pharyngeal swab
HUN_40	Hungary	EPI_ISL_526219	female	22	live	Pharyngeal swab
HUN_38	Hungary	EPI_ISL_526222	female	47	live	Pharyngeal swab
HUN_25	Hungary	EPI_ISL_526238	female	81	live	Pharyngeal swab
HUN_18	Hungary	EPI_ISL_671426	female	22	live	Pharyngeal swab
HUN_24	Hungary	EPI_ISL_671437	female	33	live	Pharyngeal swab
HUN_21	Hungary	EPI_ISL_671442	female	18	live	Pharyngeal swab
HUN_11	Hungary	EPI_ISL_671449	female	48	live	Pharyngeal swab
HUN_4	Hungary	EPI_ISL_671455	female	52	live	Pharyngeal swab
HUN_31	Hungary	EPI_ISL_671458	female	45	live	Pharyngeal swab
HUN_42	Hungary	EPI_ISL_671463	female	44	live	Pharyngeal swab
HUN_23	Hungary	EPI_ISL_671464	female	61	live	Pharyngeal swab
HUN_5	Hungary	EPI_ISL_671466	female	52	live	Pharyngeal swab
HUN_10	Hungary	EPI_ISL_671478	female	70	live	Pharyngeal swab
HUN_3	Hungary	EPI_ISL_671483	female	58	live	Pharyngeal swab
HUN_12	Hungary	EPI_ISL_671484	female	80	live	Pharyngeal swab
HUN_13	Hungary	EPI_ISL_671495	female	46	live	Pharyngeal swab
HUN_2	Hungary	EPI_ISL_677743	female	62	live	Pharyngeal swab
HUN_35	Hungary	EPI_ISL_677745	female	89	live	Pharyngeal swab
HUN_14	Hungary	EPI_ISL_677748	female	80	live	Pharyngeal swab
HUN_44	Hungary	EPI_ISL_677749	female	56	live	Pharyngeal swab
HUN_22	Hungary	EPI_ISL_677752	female	68	live	Pharyngeal swab
HUN_30	Hungary	EPI_ISL_677755	female	89	live	Pharyngeal swab
HUN_1	Hungary	EPI_ISL_677759	female	84	live	Pharyngeal swab
HUN_17	Hungary	EPI_ISL_677762	female	17	live	Pharyngeal swab		xxxxxx
HUN_19	Hungary	EPI_ISL_677764	female	74	live	Pharyngeal swab
HUN_26	Hungary	EPI_ISL_677765	female	61	live	Pharyngeal swab
HUN_6	Hungary	EPI_ISL_677769	female	23	live	Pharyngeal swab
HUN_41	Hungary	EPI_ISL_677773	female	56	live	Pharyngeal swab
HUN_36	Hungary	EPI_ISL_677774	female	84	live	Pharyngeal swab
HUN_16	Hungary	EPI_ISL_677782	female	43	live	Pharyngeal swab
HUN_27	Hungary	EPI_ISL_677785	female	65	live	Pharyngeal swab
HUN_37	Hungary	EPI_ISL_677794	female	41	live	Pharyngeal swab
HUN_15	Hungary	EPI_ISL_677798	female	36	live	Pharyngeal swab
HUN_39	Hungary	EPI_ISL_677803	female	82	live	Pharyngeal swab
HUN_28	Hungary	EPI_ISL_677810	female	54	live	Pharyngeal swab
HUN_34	Hungary	EPI_ISL_677812	female	68	live	Pharyngeal swab
HUN_32	Hungary	EPI_ISL_677815	female	32	live	Pharyngeal swab
HUN_7	Hungary	EPI_ISL_677819	female	16	live	Pharyngeal swab
HUN_33	Hungary	EPI_ISL_678394	female	44	live	Pharyngeal swab
HUN_9	Hungary	EPI_ISL_678395	female	41	live	Pharyngeal swab
HUN_10	Hungary	EPI_ISL_416744	male	28	live	Pharyngeal swab
HUN_20	Hungary	EPI_ISL_435408	male	54	live	Pharyngeal swab
HUN_36	Hungary	EPI_ISL_435414	male	71	live	Pharyngeal swab
HUN_17	Hungary	EPI_ISL_435416	male	47	live	Pharyngeal swab
HUN_8	Hungary	EPI_ISL_435425	male	48	live	Pharyngeal swab
HUN_14	Hungary	EPI_ISL_526225	male	48	live	Pharyngeal swab
HUN_4	Hungary	EPI_ISL_526227	male	36	live	Pharyngeal swab
HUN_12	Hungary	EPI_ISL_526229	male	74	live	Pharyngeal swab
HUN_7	Hungary	EPI_ISL_526234	male	87	live	Pharyngeal swab
HUN_31	Hungary	EPI_ISL_526235	male	46	live	Pharyngeal swab
HUN_24	Hungary	EPI_ISL_671416	male	35	live	Pharyngeal swab
HUN_1	Hungary	EPI_ISL_671417	male	43	live	Pharyngeal swab
HUN_22	Hungary	EPI_ISL_671421	male	19	live	Pharyngeal swab
HUN_25	Hungary	EPI_ISL_671430	male	20	live	Pharyngeal swab
HUN_2	Hungary	EPI_ISL_671436	male	65	live	Pharyngeal swab
HUN_19	Hungary	EPI_ISL_671445	male	24	live	Pharyngeal swab
HUN_34	Hungary	EPI_ISL_671453	male	25	live	Pharyngeal swab
HUN_35	Hungary	EPI_ISL_671454	male	25	live	Pharyngeal swab
HUN_3	Hungary	EPI_ISL_671459	male	45	live	Pharyngeal swab
HUN_18	Hungary	EPI_ISL_671468	male	52	live	Pharyngeal swab
HUN_21	Hungary	EPI_ISL_671475	male	30	live	Pharyngeal swab
HUN_9	Hungary	EPI_ISL_671479	male	93	live	Pharyngeal swab
HUN_26	Hungary	EPI_ISL_671485	male	45	live	Pharyngeal swab
HUN_30	Hungary	EPI_ISL_671488	male	28	live	Pharyngeal swab
HUN_11	Hungary	EPI_ISL_671492	male	57	live	Pharyngeal swab
HUN_23	Hungary	EPI_ISL_677727	male	47	live	Pharyngeal swab
HUN_28	Hungary	EPI_ISL_677731	male	47	live	Pharyngeal swab
HUN_33	Hungary	EPI_ISL_677736	male	77	live	Pharyngeal swab
HUN_32	Hungary	EPI_ISL_677744	male	41	live	Pharyngeal swab
HUN_13	Hungary	EPI_ISL_677778	male	29	live	Pharyngeal swab
HUN_15	Hungary	EPI_ISL_677787	male	50	live	Pharyngeal swab
HUN_27	Hungary	EPI_ISL_677789	male	18	live	Pharyngeal swab
HUN_16	Hungary	EPI_ISL_677799	male	19	live	Pharyngeal swab
HUN_29	Hungary	EPI_ISL_677808	male	68	live	Pharyngeal swab
HUN_6	Hungary	EPI_ISL_678387	male	25	live	Pharyngeal swab
HUN_5	Hungary	EPI_ISL_678389	male	30	live	Pharyngeal swab
ITA_233	Italy	EPI_ISL_410545	female	66	live	Sputum
ITA_164	Italy	EPI_ISL_410546	female	66	live	Pharyngeal swab
ITA_231	Italy	EPI_ISL_418257	female	75	live	Pharyngeal swab
ITA_225	Italy	EPI_ISL_435147	female	43	live	Unknown
ITA_28	Italy	EPI_ISL_435148	female	49	live	Unknown
ITA_168	Italy	EPI_ISL_435149	female	49	live	Unknown
ITA_58	Italy	EPI_ISL_435150	female	54	live	Unknown
ITA_81	Italy	EPI_ISL_435151	female	18	live	Unknown
ITA_1	Italy	EPI_ISL_436718	female	40	live	Unknown
ITA_45	Italy	EPI_ISL_436721	female	79	live	Unknown
ITA_152	Italy	EPI_ISL_436725	female	60	live	Unknown
ITA_235	Italy	EPI_ISL_436726	female	84	live	Unknown
ITA_161	Italy	EPI_ISL_436727	female	56	live	Unknown
ITA_174	Italy	EPI_ISL_436728	female	26	live	Unknown
ITA_116	Italy	EPI_ISL_436731	female	89	live	Unknown
ITA_38	Italy	EPI_ISL_436732	female	101	live	Unknown
ITA_252	Italy	EPI_ISL_451298	female	66	live	Lung tissue
ITA_167	Italy	EPI_ISL_451299	female	66	live	Lung tissue
ITA_189	Italy	EPI_ISL_451300	female	66	live	Pharyngeal swab
ITA_170	Italy	EPI_ISL_451304	female	49	live	Lung tissue
ITA_97	Italy	EPI_ISL_451305	female	49	live	Pharyngeal swab
ITA_201	Italy	EPI_ISL_460083	female	73	live	Lung tissue
ITA_154	Italy	EPI_ISL_460084	female	89	live	Pharyngeal swab
ITA_186	Italy	EPI_ISL_460085	female	45	live	Pharyngeal swab
ITA_3	Italy	EPI_ISL_460087	female	44	live	Pharyngeal swab
ITA_104	Italy	EPI_ISL_468914	female	26	live	Unknown
ITA_203	Italy	EPI_ISL_469023	female	47	live	Pharyngeal swab
ITA_70	Italy	EPI_ISL_477193	female	62	live	Pharyngeal swab
ITA_102	Italy	EPI_ISL_492987	female	48	live	Pharyngeal swab
ITA_206	Italy	EPI_ISL_493197	female	48	live	Unknown
ITA_130	Italy	EPI_ISL_494756	female	27	live	Unknown
ITA_244	Italy	EPI_ISL_494757	female	84	live	Unknown
ITA_178	Italy	EPI_ISL_494761	female	60	live	Unknown
ITA_155	Italy	EPI_ISL_494775	female	67	live	Unknown
ITA_179	Italy	EPI_ISL_498559	female	50	live	Pharyngeal swab
ITA_43	Italy	EPI_ISL_498562	female	31	live	Unknown
ITA_62	Italy	EPI_ISL_498563	female	27	live	Pharyngeal swab
ITA_32	Italy	EPI_ISL_525556	female	87	live	Pharyngeal swab
ITA_209	Italy	EPI_ISL_525557	female	73	live	Pharyngeal swab
ITA_52	Italy	EPI_ISL_525571	female	86	live	Pharyngeal swab
ITA_9	Italy	EPI_ISL_525572	female	86	live	Pharyngeal swab
ITA_24	Italy	EPI_ISL_528921	female	30	live	Unknown
ITA_72	Italy	EPI_ISL_528922	female	72	live	Unknown
ITA_214	Italy	EPI_ISL_528926	female	49	live	Unknown
ITA_94	Italy	EPI_ISL_528928	female	38	live	Unknown
ITA_91	Italy	EPI_ISL_528934	female	45	live	Unknown
ITA_17	Italy	EPI_ISL_528935	female	58	live	Unknown
ITA_248	Italy	EPI_ISL_528936	female	91	live	Unknown
ITA_11	Italy	EPI_ISL_528937	female	86	live	Unknown
ITA_210	Italy	EPI_ISL_528938	female	60	live	Unknown
ITA_63	Italy	EPI_ISL_528939	female	63	live	Unknown
ITA_18	Italy	EPI_ISL_528941	female	59	live	Unknown
ITA_192	Italy	EPI_ISL_528942	female	38	live	Unknown
ITA_83	Italy	EPI_ISL_528943	female	90	live	Unknown
ITA_202	Italy	EPI_ISL_528944	female	55	live	Unknown
ITA_153	Italy	EPI_ISL_528945	female	78	live	Unknown
ITA_122	Italy	EPI_ISL_528946	female	94	live	Unknown
ITA_68	Italy	EPI_ISL_528947	female	82	live	Unknown
ITA_149	Italy	EPI_ISL_528948	female	92	live	Unknown
ITA_25	Italy	EPI_ISL_528949	female	100	live	Unknown
ITA_232	Italy	EPI_ISL_528993	female	81	live	Unknown
ITA_86	Italy	EPI_ISL_528994	female	61	live	Unknown
ITA_236	Italy	EPI_ISL_528995	female	40	live	Unknown
ITA_76	Italy	EPI_ISL_528997	female	2	live	Unknown
ITA_56	Italy	EPI_ISL_528998	female	8	live	Unknown
ITA_146	Italy	EPI_ISL_528999	female	27	live	Unknown
ITA_230	Italy	EPI_ISL_529000	female	47	live	Unknown
ITA_194	Italy	EPI_ISL_529001	female	24	live	Unknown
ITA_127	Italy	EPI_ISL_529002	female	12	live	Unknown
ITA_219	Italy	EPI_ISL_529003	female	17	live	Unknown
ITA_240	Italy	EPI_ISL_529005	female	73	live	Unknown
ITA_243	Italy	EPI_ISL_529007	female	68	live	Unknown
ITA_39	Italy	EPI_ISL_529008	female	49	live	Unknown
ITA_245	Italy	EPI_ISL_529009	female	85	live	Unknown
ITA_23	Italy	EPI_ISL_529010	female	39	live	Unknown
ITA_44	Italy	EPI_ISL_529015	female	36	live	Unknown
ITA_199	Italy	EPI_ISL_529016	female	54	live	Unknown
ITA_92	Italy	EPI_ISL_529017	female	71	live	Unknown
ITA_114	Italy	EPI_ISL_529019	female	84	live	Unknown
ITA_108	Italy	EPI_ISL_529020	female	78	live	Unknown
ITA_137	Italy	EPI_ISL_529021	female	81	live	Unknown
ITA_96	Italy	EPI_ISL_529022	female	2	live	Unknown
ITA_145	Italy	EPI_ISL_529024	female	30	live	Unknown
ITA_115	Italy	EPI_ISL_529026	female	74	live	Unknown
ITA_187	Italy	EPI_ISL_542106	female	72	mild	Pharyngeal swab
ITA_105	Italy	EPI_ISL_542110	female	37	mild	Pharyngeal swab
ITA_220	Italy	EPI_ISL_542120	female	86	mild	Pharyngeal swab
ITA_163	Italy	EPI_ISL_542122	female	43	mild	Pharyngeal swab
ITA_253	Italy	EPI_ISL_542124	female	82	mild	Pharyngeal swab
ITA_195	Italy	EPI_ISL_542128	female	96	mild	Pharyngeal swab
ITA_69	Italy	EPI_ISL_542131	female	83	moderate	Pharyngeal swab
ITA_101	Italy	EPI_ISL_542133	female	86	mild	Pharyngeal swab
ITA_84	Italy	EPI_ISL_542146	female	74	moderate	Pharyngeal swab
ITA_159	Italy	EPI_ISL_542152	female	53	mild	Pharyngeal swab
ITA_49	Italy	EPI_ISL_542153	female	89	critical	Pharyngeal swab
ITA_89	Italy	EPI_ISL_542159	female	77	moderate	Pharyngeal swab
ITA_73	Italy	EPI_ISL_542162	female	55	mild	Pharyngeal swab
ITA_27	Italy	EPI_ISL_542165	female	80	mild	Pharyngeal swab
ITA_165	Italy	EPI_ISL_542166	female	63	mild	Pharyngeal swab
ITA_111	Italy	EPI_ISL_542169	female	47	mild	Pharyngeal swab
ITA_5	Italy	EPI_ISL_542170	female	96	mild	Pharyngeal swab
ITA_61	Italy	EPI_ISL_542172	female	89	mild	Pharyngeal swab
ITA_224	Italy	EPI_ISL_542173	female	45	mild	Pharyngeal swab
ITA_229	Italy	EPI_ISL_542174	female	69	mild	Pharyngeal swab
ITA_67	Italy	EPI_ISL_542178	female	79	mild	Pharyngeal swab
ITA_48	Italy	EPI_ISL_542180	female	89	mild	Pharyngeal swab
ITA_7	Italy	EPI_ISL_542183	female	92	mild	Pharyngeal swab
ITA_22	Italy	EPI_ISL_542195	female	85	severe	Pharyngeal swab
ITA_136	Italy	EPI_ISL_542196	female	57	severe	Pharyngeal swab
ITA_30	Italy	EPI_ISL_542199	female	88	severe	Pharyngeal swab
ITA_57	Italy	EPI_ISL_542207	female	21	moderate	Pharyngeal swab
ITA_226	Italy	EPI_ISL_542208	female	58	moderate	Pharyngeal swab
ITA_193	Italy	EPI_ISL_542212	female	53	mild	Pharyngeal swab
ITA_238	Italy	EPI_ISL_542213	female	82	mild	Pharyngeal swab
ITA_119	Italy	EPI_ISL_542220	female	41	moderate	Pharyngeal swab
ITA_66	Italy	EPI_ISL_542221	female	19	mild	Pharyngeal swab
ITA_198	Italy	EPI_ISL_542222	female	68	moderate	Pharyngeal swab
ITA_173	Italy	EPI_ISL_542223	female	76	mild	Pharyngeal swab
ITA_118	Italy	EPI_ISL_542224	female	66	mild	Pharyngeal swab
ITA_131	Italy	EPI_ISL_542225	female	76	mild	Pharyngeal swab
ITA_82	Italy	EPI_ISL_542228	female	59	mild	Pharyngeal swab
ITA_65	Italy	EPI_ISL_542232	female	80	mild	Pharyngeal swab
ITA_14	Italy	EPI_ISL_542234	female	78	mild	Pharyngeal swab
ITA_183	Italy	EPI_ISL_542240	female	69	moderate	Pharyngeal swab
ITA_103	Italy	EPI_ISL_542243	female	53	mild	Pharyngeal swab
ITA_182	Italy	EPI_ISL_542253	female	82	mild	Pharyngeal swab
ITA_99	Italy	EPI_ISL_542254	female	47	mild	Pharyngeal swab
ITA_75	Italy	EPI_ISL_542255	female	54	severe	Pharyngeal swab
ITA_250	Italy	EPI_ISL_542257	female	85	mild	Pharyngeal swab
ITA_34	Italy	EPI_ISL_542260	female	90	severe	Pharyngeal swab
ITA_144	Italy	EPI_ISL_542262	female	92	severe	Pharyngeal swab
ITA_180	Italy	EPI_ISL_542264	female	46	mild	Pharyngeal swab
ITA_181	Italy	EPI_ISL_542275	female	66	mild	Pharyngeal swab
ITA_36	Italy	EPI_ISL_542277	female	75	severe	Pharyngeal swab
ITA_148	Italy	EPI_ISL_542278	female	88	mild	Pharyngeal swab
ITA_47	Italy	EPI_ISL_542279	female	19	mild	Pharyngeal swab
ITA_175	Italy	EPI_ISL_542286	female	81	mild	Pharyngeal swab
ITA_121	Italy	EPI_ISL_542288	female	81	critical	Pharyngeal swab
ITA_31	Italy	EPI_ISL_542289	female	97	moderate	Pharyngeal swab
ITA_185	Italy	EPI_ISL_542292	female	84	severe	Pharyngeal swab
ITA_79	Italy	EPI_ISL_542302	female	68	severe	Pharyngeal swab
ITA_184	Italy	EPI_ISL_542314	female	71	moderate	Pharyngeal swab
ITA_135	Italy	EPI_ISL_542315	female	85	mild	Pharyngeal swab
ITA_227	Italy	EPI_ISL_542317	female	95	critical	Pharyngeal swab
ITA_120	Italy	EPI_ISL_542318	female	80	mild	Pharyngeal swab
ITA_157	Italy	EPI_ISL_542324	female	81	mild	Pharyngeal swab
ITA_140	Italy	EPI_ISL_542328	female	98	severe	Pharyngeal swab
ITA_100	Italy	EPI_ISL_542329	female	43	mild	Pharyngeal swab
ITA_93	Italy	EPI_ISL_542331	female	78	severe	Pharyngeal swab
ITA_42	Italy	EPI_ISL_542333	female	91	severe	Pharyngeal swab
ITA_162	Italy	EPI_ISL_542336	female	74	moderate	Pharyngeal swab
ITA_160	Italy	EPI_ISL_542338	female	84	mild	Pharyngeal swab
ITA_223	Italy	EPI_ISL_542343	female	86	moderate	Pharyngeal swab
ITA_177	Italy	EPI_ISL_542345	female	82	mild	Pharyngeal swab
ITA_98	Italy	EPI_ISL_542347	female	66	mild	Pharyngeal swab
ITA_90	Italy	EPI_ISL_542350	female	49	severe	Pharyngeal swab
ITA_106	Italy	EPI_ISL_542351	female	86	mild	Pharyngeal swab
ITA_51	Italy	EPI_ISL_542352	female	80	severe	Pharyngeal swab
ITA_128	Italy	EPI_ISL_542354	female	54	mild	Pharyngeal swab
ITA_207	Italy	EPI_ISL_542358	female	84	critical	Pharyngeal swab
ITA_78	Italy	EPI_ISL_542359	female	90	mild	Pharyngeal swab
ITA_138	Italy	EPI_ISL_542360	female	57	mild	Pharyngeal swab
ITA_215	Italy	EPI_ISL_542361	female	84	moderate	Pharyngeal swab
ITA_156	Italy	EPI_ISL_542363	female	75	severe	Pharyngeal swab
ITA_142	Italy	EPI_ISL_542364	female	25	mild	Pharyngeal swab
ITA_15	Italy	EPI_ISL_542365	female	93	mild	Pharyngeal swab
ITA_117	Italy	EPI_ISL_542366	female	80	moderate	Pharyngeal swab
ITA_13	Italy	EPI_ISL_542369	female	59	mild	Pharyngeal swab
ITA_204	Italy	EPI_ISL_542371	female	51	mild	Pharyngeal swab
ITA_33	Italy	EPI_ISL_542373	female	84	moderate	Pharyngeal swab
ITA_143	Italy	EPI_ISL_542374	female	84	moderate	Pharyngeal swab
ITA_80	Italy	EPI_ISL_542376	female	83	severe	Pharyngeal swab
ITA_88	Italy	EPI_ISL_542377	female	87	moderate	Pharyngeal swab
ITA_212	Italy	EPI_ISL_542381	female	71	mild	Pharyngeal swab
ITA_208	Italy	EPI_ISL_542382	female	89	moderate	Pharyngeal swab
ITA_234	Italy	EPI_ISL_542384	female	85	critical	Pharyngeal swab
ITA_249	Italy	EPI_ISL_542390	female	56	mild	Pharyngeal swab
ITA_251	Italy	EPI_ISL_542415	female	72	moderate	Pharyngeal swab
ITA_4	Italy	EPI_ISL_542419	female	88	critical	Pharyngeal swab
ITA_197	Italy	EPI_ISL_542421	female	41	moderate	Pharyngeal swab
ITA_107	Italy	EPI_ISL_542422	female	73	severe	Pharyngeal swab
ITA_53	Italy	EPI_ISL_542426	female	49	mild	Pharyngeal swab
ITA_190	Italy	EPI_ISL_542442	female	90	moderate	Pharyngeal swab
ITA_239	Italy	EPI_ISL_569865	female	56	released	Pharyngeal swab
ITA_10	Italy	EPI_ISL_569866	female	83	deceased	Pharyngeal swab
ITA_150	Italy	EPI_ISL_569870	female	59	live	Pharyngeal swab
ITA_60	Italy	EPI_ISL_569872	female	76	live	Pharyngeal swab
ITA_246	Italy	EPI_ISL_569873	female	49	live	Pharyngeal swab
ITA_59	Italy	EPI_ISL_569876	female	60	released	Pharyngeal swab
ITA_29	Italy	EPI_ISL_569877	female	83	live	Pharyngeal swab
ITA_95	Italy	EPI_ISL_569879	female	44	released	Pharyngeal swab
ITA_211	Italy	EPI_ISL_569880	female	81	deceased	Pharyngeal swab
ITA_216	Italy	EPI_ISL_569881	female	63	released	Pharyngeal swab
ITA_113	Italy	EPI_ISL_569882	female	78	live	Pharyngeal swab
ITA_21	Italy	EPI_ISL_569886	female	80	live	Pharyngeal swab
ITA_35	Italy	EPI_ISL_603137	female	58	live	Unknown
ITA_12	Italy	EPI_ISL_603138	female	60	live	Unknown
ITA_217	Italy	EPI_ISL_603142	female	76	live	Unknown
ITA_247	Italy	EPI_ISL_603145	female	76	live	Unknown
ITA_109	Italy	EPI_ISL_603147	female	83	deceased	Unknown
ITA_133	Italy	EPI_ISL_603148	female	82	live	Unknown
ITA_132	Italy	EPI_ISL_603149	female	86	mild	Pharyngeal swab
ITA_191	Italy	EPI_ISL_603150	female	55	live	Unknown
ITA_40	Italy	EPI_ISL_603151	female	23	live	Unknown
ITA_41	Italy	EPI_ISL_603155	female	63	live	Unknown
ITA_205	Italy	EPI_ISL_603156	female	77	live	Unknown
ITA_172	Italy	EPI_ISL_603163	female	77	live	Unknown
ITA_126	Italy	EPI_ISL_603165	female	85	live	Unknown
ITA_123	Italy	EPI_ISL_603167	female	54	live	Unknown
ITA_221	Italy	EPI_ISL_603170	female	80	deceased	Unknown
ITA_2	Italy	EPI_ISL_603172	female	62	live	Unknown
ITA_228	Italy	EPI_ISL_603173	female	87	live	Unknown
ITA_110	Italy	EPI_ISL_603174	female	53	live	Unknown
ITA_200	Italy	EPI_ISL_603176	female	76	live	Unknown
ITA_169	Italy	EPI_ISL_613560	female	29	live	Pharyngeal swab
ITA_125	Italy	EPI_ISL_613710	female	47	live	Unknown
ITA_20	Italy	EPI_ISL_614396	female	70	deceased	Pharyngeal swab
ITA_237	Italy	EPI_ISL_614889	female	47	live	Pharyngeal swab
ITA_171	Italy	EPI_ISL_637108	female	54	live	Pharyngeal swab
ITA_158	Italy	EPI_ISL_649939	female	65	asymptomatic	Pharyngeal swab
ITA_19	Italy	EPI_ISL_653763	female	66	mild	Pharyngeal swab
ITA_8	Italy	EPI_ISL_653765	female	43	asymptomatic	Pharyngeal swab
ITA_46	Italy	EPI_ISL_653767	female	56	asymptomatic	Pharyngeal swab
ITA_188	Italy	EPI_ISL_653769	female	71	live	Pharyngeal swab
ITA_87	Italy	EPI_ISL_653772	female	44	live	Pharyngeal swab
ITA_64	Italy	EPI_ISL_653773	female	7	live	Pharyngeal swab
ITA_213	Italy	EPI_ISL_653777	female	2	asymptomatic	Pharyngeal swab
ITA_16	Italy	EPI_ISL_653778	female	6	asymptomatic	Pharyngeal swab
ITA_166	Italy	EPI_ISL_653779	female	47	live	Pharyngeal swab
ITA_139	Italy	EPI_ISL_653783	female	47	live	Pharyngeal swab
ITA_134	Italy	EPI_ISL_653784	female	59	asymptomatic	Pharyngeal swab
ITA_26	Italy	EPI_ISL_653785	female	24	asymptomatic	Pharyngeal swab
ITA_242	Italy	EPI_ISL_653787	female	60	live	Pharyngeal swab
ITA_50	Italy	EPI_ISL_653789	female	33	asymptomatic	Pharyngeal swab
ITA_222	Italy	EPI_ISL_653791	female	26	asymptomatic	Pharyngeal swab
ITA_147	Italy	EPI_ISL_653794	female	34	live	Pharyngeal swab
ITA_176	Italy	EPI_ISL_653795	female	60	live	Pharyngeal swab
ITA_6	Italy	EPI_ISL_653800	female	17	live	Pharyngeal swab
ITA_54	Italy	EPI_ISL_653801	female	30	asymptomatic	Pharyngeal swab
ITA_112	Italy	EPI_ISL_653803	female	13	asymptomatic	Pharyngeal swab
ITA_74	Italy	EPI_ISL_653804	female	28	asymptomatic	Pharyngeal swab
ITA_196	Italy	EPI_ISL_653805	female	20	live	Pharyngeal swab
ITA_71	Italy	EPI_ISL_653806	female	65	asymptomatic	Pharyngeal swab
ITA_218	Italy	EPI_ISL_653808	female	25	live	Pharyngeal swab
ITA_241	Italy	EPI_ISL_653813	female	91	live	Pharyngeal swab
ITA_151	Italy	EPI_ISL_653814	female	25	asymptomatic	Pharyngeal swab
ITA_124	Italy	EPI_ISL_653815	female	35	live	Pharyngeal swab
ITA_55	Italy	EPI_ISL_653816	female	28	live	Pharyngeal swab
ITA_129	Italy	EPI_ISL_653817	female	47	live	Pharyngeal swab
ITA_37	Italy	EPI_ISL_653818	female	40	asymptomatic	Pharyngeal swab
ITA_77	Italy	EPI_ISL_653819	female	57	live	Pharyngeal swab
ITA_141	Italy	EPI_ISL_653820	female	61	live	Pharyngeal swab
ITA_85	Italy	EPI_ISL_710503	female	53	live	Pharyngeal swab
ITA_189	Italy	EPI_ISL_417491	male	75	live	Pharyngeal swab
ITA_259	Italy	EPI_ISL_418256	male	80	live	Pharyngeal swab
ITA_255	Italy	EPI_ISL_435145	male	67	live	Unknown
ITA_92	Italy	EPI_ISL_435146	male	36	live	Unknown
ITA_126	Italy	EPI_ISL_435152	male	35	live	Unknown
ITA_274	Italy	EPI_ISL_435153	male	29	live	Unknown
ITA_41	Italy	EPI_ISL_435154	male	65	live	Unknown
ITA_46	Italy	EPI_ISL_435155	male	24	live	Unknown
ITA_77	Italy	EPI_ISL_436719	male	75	live	Unknown
ITA_61	Italy	EPI_ISL_436720	male	62	live	Unknown
ITA_184	Italy	EPI_ISL_436722	male	81	live	Unknown
ITA_73	Italy	EPI_ISL_436723	male	65	live	Unknown
ITA_4	Italy	EPI_ISL_436724	male	70	live	Unknown
ITA_108	Italy	EPI_ISL_436729	male	49	live	Unknown
ITA_172	Italy	EPI_ISL_436730	male	93	mild	Pharyngeal swab
ITA_303	Italy	EPI_ISL_451301	male	67	live	Lung tissue	Tourist in Rome from Hubei Province
ITA_305	Italy	EPI_ISL_451302	male	67	live	Pharyngeal swab	Tourist in Rome from Hubei Province
ITA_138	Italy	EPI_ISL_451303	male	53	live	Pharyngeal swab	Tourist in Rome from Hubei Province
ITA_264	Italy	EPI_ISL_451306	male	75	live	Lung tissue	ourist in Rome from Hubei Province
ITA_65	Italy	EPI_ISL_451307	male	75	live	Pharyngeal swab
ITA_67	Italy	EPI_ISL_451308	male	54	live	Lung tissue
ITA_304	Italy	EPI_ISL_451309	male	54	live	Pharyngeal swab
ITA_83	Italy	EPI_ISL_451961	male	61	released	Unknown
ITA_266	Italy	EPI_ISL_451962	male	56	released	Pharyngeal swab
ITA_167	Italy	EPI_ISL_460079	male	83	live	Pharyngeal swab
ITA_176	Italy	EPI_ISL_460080	male	87	live	Pharyngeal swab
ITA_14	Italy	EPI_ISL_460081	male	65	live	Pharyngeal swab
ITA_309	Italy	EPI_ISL_460082	male	87	live	Pharyngeal swab
ITA_254	Italy	EPI_ISL_460086	male	60	live	Lung tissue
ITA_215	Italy	EPI_ISL_460088	male	78	live	Pharyngeal swab
ITA_12	Italy	EPI_ISL_460089	male	88	live	Pharyngeal swab
ITA_81	Italy	EPI_ISL_460091	male	37	live	Pharyngeal swab
ITA_76	Italy	EPI_ISL_460092	male	80	live	Pharyngeal swab
ITA_121	Italy	EPI_ISL_460093	male	1	live	Pharyngeal swab
ITA_132	Italy	EPI_ISL_460094	male	78	live	Pharyngeal swab
ITA_29	Italy	EPI_ISL_469016	male	72	live	Unknown
ITA_72	Italy	EPI_ISL_469018	male	43	live	Unknown
ITA_245	Italy	EPI_ISL_469019	male	56	live	Unknown
ITA_10	Italy	EPI_ISL_469020	male	36	live	Unknown
ITA_181	Italy	EPI_ISL_469021	male	47	asymptomatic	Unknown
ITA_142	Italy	EPI_ISL_469022	male	45	asymptomatic	Unknown
ITA_164	Italy	EPI_ISL_477194	male	67	live	Pharyngeal swab
ITA_179	Italy	EPI_ISL_477202	male	88	live	Pharyngeal swab
ITA_101	Italy	EPI_ISL_479616	male	47	released	Lung tissue
ITA_139	Italy	EPI_ISL_479617	male	47	released	Lung tissue
ITA_292	Italy	EPI_ISL_479618	male	59	deceased	Lung tissue
ITA_249	Italy	EPI_ISL_479619	male	59	deceased	Pharyngeal swab
ITA_232	Italy	EPI_ISL_479790	male	67	deceased	Pharyngeal swab
ITA_168	Italy	EPI_ISL_479791	male	71	live	Pharyngeal swab
ITA_252	Italy	EPI_ISL_492184	male	47	live	Unknown
ITA_17	Italy	EPI_ISL_492982	male	61	live	Pharyngeal swab
ITA_135	Italy	EPI_ISL_492983	male	82	live	Pharyngeal swab
ITA_70	Italy	EPI_ISL_492984	male	59	live	Pharyngeal swab
ITA_246	Italy	EPI_ISL_492985	male	52	live	Pharyngeal swab
ITA_256	Italy	EPI_ISL_492986	male	67	live	Pharyngeal swab
ITA_95	Italy	EPI_ISL_493213	male	66	live	Unknown
ITA_11	Italy	EPI_ISL_493332	male	65	asymptomatic	Unknown
ITA_302	Italy	EPI_ISL_493333	male	64	asymptomatic	Unknown
ITA_270	Italy	EPI_ISL_494759	male	71	live	Unknown
ITA_21	Italy	EPI_ISL_494762	male	61	live	Unknown
ITA_195	Italy	EPI_ISL_494763	male	23	live	Unknown
ITA_115	Italy	EPI_ISL_494771	male	78	live	Unknown
ITA_206	Italy	EPI_ISL_494774	male	26	live	Unknown
ITA_200	Italy	EPI_ISL_494776	male	33	live	Unknown
ITA_226	Italy	EPI_ISL_498558	male	67	live	Unknown
ITA_201	Italy	EPI_ISL_498560	male	17	live	Pharyngeal swab
ITA_146	Italy	EPI_ISL_498561	male	54	live	Pharyngeal swab
ITA_5	Italy	EPI_ISL_525553	male	65	live	Pharyngeal swab
ITA_1	Italy	EPI_ISL_525570	male	72	live	Pharyngeal swab
ITA_149	Italy	EPI_ISL_528919	male	89	live	Unknown
ITA_104	Italy	EPI_ISL_528920	male	43	live	Unknown
ITA_43	Italy	EPI_ISL_528923	male	62	live	Unknown
ITA_163	Italy	EPI_ISL_528924	male	45	live	Unknown
ITA_117	Italy	EPI_ISL_528925	male	35	live	Unknown
ITA_75	Italy	EPI_ISL_528927	male	83	live	Unknown
ITA_93	Italy	EPI_ISL_528929	male	67	live	Unknown
ITA_28	Italy	EPI_ISL_528940	male	48	live	Unknown
ITA_98	Italy	EPI_ISL_528990	male	90	live	Unknown
ITA_223	Italy	EPI_ISL_528991	male	52	live	Unknown
ITA_177	Italy	EPI_ISL_528992	male	62	live	unknown
ITA_193	Italy	EPI_ISL_528996	male	4	live	Unknown
ITA_285	Italy	EPI_ISL_529004	male	77	live	Unknown
ITA_204	Italy	EPI_ISL_529006	male	68	live	Unknown
ITA_56	Italy	EPI_ISL_529011	male	38	live	Unknown
ITA_40	Italy	EPI_ISL_529012	male	39	live	Unknown
ITA_118	Italy	EPI_ISL_529013	male	44	live	Unknown
ITA_162	Italy	EPI_ISL_529014	male	0.3	live	Unknown
ITA_219	Italy	EPI_ISL_529018	male	69	live	Unknown
ITA_173	Italy	EPI_ISL_529023	male	44	live	Unknown
ITA_288	Italy	EPI_ISL_529025	male	40	live	Unknown
ITA_298	Italy	EPI_ISL_542099	male	59	mild	Pharyngeal swab
ITA_113	Italy	EPI_ISL_542101	male	64	mild	Pharyngeal swab
ITA_39	Italy	EPI_ISL_542104	male	90	critical	Pharyngeal swab
ITA_278	Italy	EPI_ISL_542107	male	59	mild	Pharyngeal swab
ITA_261	Italy	EPI_ISL_542108	male	74	moderate	Pharyngeal swab
ITA_186	Italy	EPI_ISL_542112	male	64	mild	Pharyngeal swab
ITA_229	Italy	EPI_ISL_542114	male	86	mild	Pharyngeal swab
ITA_106	Italy	EPI_ISL_542116	male	68	moderate	Pharyngeal swab
ITA_49	Italy	EPI_ISL_542118	male	68	severe	Pharyngeal swab
ITA_136	Italy	EPI_ISL_542119	male	54	mild	Pharyngeal swab
ITA_221	Italy	EPI_ISL_542121	male	43	severe	Pharyngeal swab
ITA_147	Italy	EPI_ISL_542130	male	68	mild	Pharyngeal swab
ITA_196	Italy	EPI_ISL_542145	male	74	mild	Pharyngeal swab
ITA_64	Italy	EPI_ISL_542154	male	78	mild	Pharyngeal swab
ITA_25	Italy	EPI_ISL_542155	male	31	critical	Pharyngeal swab
ITA_203	Italy	EPI_ISL_542156	male	72	mild	Pharyngeal swab
ITA_13	Italy	EPI_ISL_542158	male	48	mild	Pharyngeal swab
ITA_78	Italy	EPI_ISL_542175	male	88	mild	Pharyngeal swab
ITA_97	Italy	EPI_ISL_542181	male	91	mild	Pharyngeal swab
ITA_27	Italy	EPI_ISL_542192	male	19	mild	Pharyngeal swab
ITA_253	Italy	EPI_ISL_542193	male	78	severe	Pharyngeal swab
ITA_237	Italy	EPI_ISL_542194	male	65	severe	Pharyngeal swab
ITA_171	Italy	EPI_ISL_542197	male	66	severe	Pharyngeal swab
ITA_194	Italy	EPI_ISL_542198	male	60	severe	Pharyngeal swab
ITA_287	Italy	EPI_ISL_542200	male	72	critical	Pharyngeal swab
ITA_100	Italy	EPI_ISL_542201	male	85	severe	Pharyngeal swab
ITA_231	Italy	EPI_ISL_542202	male	60	moderate	Pharyngeal swab
ITA_69	Italy	EPI_ISL_542203	male	20	mild	Pharyngeal swab
ITA_33	Italy	EPI_ISL_542204	male	27	mild	Pharyngeal swab
ITA_112	Italy	EPI_ISL_542205	male	83	severe	Pharyngeal swab
ITA_57	Italy	EPI_ISL_542206	male	38	severe	Pharyngeal swab
ITA_124	Italy	EPI_ISL_542209	male	22	mild	Pharyngeal swab
ITA_59	Italy	EPI_ISL_542210	male	86	severe	Pharyngeal swab
ITA_217	Italy	EPI_ISL_542211	male	68	critical	Pharyngeal swab
ITA_218	Italy	EPI_ISL_542214	male	87	severe	Pharyngeal swab
ITA_15	Italy	EPI_ISL_542215	male	92	severe	Pharyngeal swab
ITA_174	Italy	EPI_ISL_542216	male	59	moderate	Pharyngeal swab
ITA_306	Italy	EPI_ISL_542217	male	55	mild	Pharyngeal swab
ITA_82	Italy	EPI_ISL_542218	male	51	severe	Pharyngeal swab
ITA_152	Italy	EPI_ISL_542219	male	69	severe	Pharyngeal swab
ITA_166	Italy	EPI_ISL_542226	male	72	mild	Pharyngeal swab
ITA_150	Italy	EPI_ISL_542227	male	39	mild	Pharyngeal swab
ITA_307	Italy	EPI_ISL_542229	male	38	mild	Pharyngeal swab
ITA_286	Italy	EPI_ISL_542230	male	79	mild	Pharyngeal swab
ITA_262	Italy	EPI_ISL_542231	male	34	mild	Pharyngeal swab
ITA_170	Italy	EPI_ISL_542233	male	62	mild	Pharyngeal swab
ITA_125	Italy	EPI_ISL_542236	male	78	mild	Pharyngeal swab
ITA_242	Italy	EPI_ISL_542237	male	84	mild	Pharyngeal swab
ITA_111	Italy	EPI_ISL_542238	male	89	mild	Pharyngeal swab
ITA_52	Italy	EPI_ISL_542239	male	85	mild	Pharyngeal swab
ITA_202	Italy	EPI_ISL_542241	male	96	moderate	Pharyngeal swab
ITA_131	Italy	EPI_ISL_542242	male	73	mild	Pharyngeal swab
ITA_275	Italy	EPI_ISL_542248	male	87	moderate	Pharyngeal swab
ITA_96	Italy	EPI_ISL_542249	male	67	severe	Pharyngeal swab
ITA_224	Italy	EPI_ISL_542252	male	57	mild	Pharyngeal swab
ITA_293	Italy	EPI_ISL_542258	male	78	mild	Pharyngeal swab
ITA_175	Italy	EPI_ISL_542261	male	56	mild	Pharyngeal swab
ITA_178	Italy	EPI_ISL_542263	male	82	moderate	Pharyngeal swab
ITA_296	Italy	EPI_ISL_542274	male	77	severe	Pharyngeal swab
ITA_198	Italy	EPI_ISL_542276	male	64	moderate	Pharyngeal swab
ITA_279	Italy	EPI_ISL_542280	male	80	mild	Pharyngeal swab
ITA_36	Italy	EPI_ISL_542281	male	91	mild	Pharyngeal swab
ITA_248	Italy	EPI_ISL_542282	male	60	mild	Pharyngeal swab
ITA_105	Italy	EPI_ISL_542283	male	76	mild	Pharyngeal swab
ITA_84	Italy	EPI_ISL_542284	male	82	mild	Pharyngeal swab
ITA_88	Italy	EPI_ISL_542285	male	85	mild	Pharyngeal swab
ITA_42	Italy	EPI_ISL_542287	male	84	mild	Pharyngeal swab
ITA_145	Italy	EPI_ISL_542290	male	89	mild	Pharyngeal swab
ITA_30	Italy	EPI_ISL_542291	male	94	severe	Pharyngeal swab
ITA_159	Italy	EPI_ISL_542294	male	59	severe	Pharyngeal swab
ITA_45	Italy	EPI_ISL_542297	male	52	moderate	Pharyngeal swab
ITA_137	Italy	EPI_ISL_542299	male	49	mild	Pharyngeal swab
ITA_47	Italy	EPI_ISL_542303	male	66	mild	Pharyngeal swab
ITA_257	Italy	EPI_ISL_542304	male	70	mild	Pharyngeal swab
ITA_90	Italy	EPI_ISL_542305	male	61	moderate	Pharyngeal swab
ITA_16	Italy	EPI_ISL_542306	male	36	severe	Pharyngeal swab
ITA_280	Italy	EPI_ISL_542307	male	82	mild	Pharyngeal swab
ITA_220	Italy	EPI_ISL_542308	male	78	mild	Pharyngeal swab
ITA_211	Italy	EPI_ISL_542309	male	51	mild	Pharyngeal swab
ITA_20	Italy	EPI_ISL_542310	male	55	moderate	Pharyngeal swab
ITA_205	Italy	EPI_ISL_542311	male	75	severe	Pharyngeal swab
ITA_283	Italy	EPI_ISL_542312	male	36	moderate	Pharyngeal swab
ITA_3	Italy	EPI_ISL_542313	male	37	moderate	Pharyngeal swab
ITA_214	Italy	EPI_ISL_542316	male	75	mild	Pharyngeal swab
ITA_244	Italy	EPI_ISL_542319	male	72	moderate	Pharyngeal swab
ITA_24	Italy	EPI_ISL_542320	male	24	mild	Pharyngeal swab
ITA_71	Italy	EPI_ISL_542321	male	93	severe	Pharyngeal swab
ITA_19	Italy	EPI_ISL_542322	male	62	mild	Pharyngeal swab
ITA_269	Italy	EPI_ISL_542323	male	68	moderate	Pharyngeal swab
ITA_258	Italy	EPI_ISL_542325	male	60	severe	Pharyngeal swab
ITA_154	Italy	EPI_ISL_542326	male	45	moderate	Pharyngeal swab
ITA_187	Italy	EPI_ISL_542327	male	55	mild	Pharyngeal swab
ITA_134	Italy	EPI_ISL_542330	male	89	severe	Pharyngeal swab
ITA_87	Italy	EPI_ISL_542332	male	70	severe	Pharyngeal swab
ITA_141	Italy	EPI_ISL_542334	male	90	severe	Pharyngeal swab
ITA_250	Italy	EPI_ISL_542335	male	40	mild	Pharyngeal swab
ITA_109	Italy	EPI_ISL_542337	male	34	severe	Pharyngeal swab
ITA_222	Italy	EPI_ISL_542339	male	68	severe	Pharyngeal swab
ITA_35	Italy	EPI_ISL_542340	male	81	severe	Pharyngeal swab
ITA_7	Italy	EPI_ISL_542341	male	49	mild	Pharyngeal swab
ITA_114	Italy	EPI_ISL_542342	male	82	mild	Pharyngeal swab
ITA_89	Italy	EPI_ISL_542344	male	86	mild	Pharyngeal swab
ITA_102	Italy	EPI_ISL_542346	male	63	moderate	Pharyngeal swab
ITA_51	Italy	EPI_ISL_542348	male	31	mild	Pharyngeal swab
ITA_119	Italy	EPI_ISL_542349	male	79	mild	Pharyngeal swab
ITA_55	Italy	EPI_ISL_542353	male	89	moderate	Pharyngeal swab
ITA_127	Italy	EPI_ISL_542355	male	77	severe	Pharyngeal swab
ITA_144	Italy	EPI_ISL_542357	male	79	severe	Pharyngeal swab
ITA_301	Italy	EPI_ISL_542362	male	91	moderate	Pharyngeal swab
ITA_267	Italy	EPI_ISL_542367	male	46	moderate	Pharyngeal swab
ITA_282	Italy	EPI_ISL_542370	male	73	mild	Pharyngeal swab
ITA_110	Italy	EPI_ISL_542372	male	99	mild	Pharyngeal swab
ITA_192	Italy	EPI_ISL_542375	male	28	mild	Pharyngeal swab
ITA_68	Italy	EPI_ISL_542378	male	47	moderate	Pharyngeal swab
ITA_299	Italy	EPI_ISL_542379	male	77	severe	Pharyngeal swab
ITA_308	Italy	EPI_ISL_542383	male	73	moderate	Pharyngeal swab
ITA_85	Italy	EPI_ISL_542385	male	85	mild	Pharyngeal swab
ITA_169	Italy	EPI_ISL_542386	male	49	mild	Pharyngeal swab
ITA_66	Italy	EPI_ISL_542387	male	67	moderate	Pharyngeal swab
ITA_80	Italy	EPI_ISL_542388	male	64	moderate	Pharyngeal swab
ITA_8	Italy	EPI_ISL_542389	male	79	mild	Pharyngeal swab
ITA_79	Italy	EPI_ISL_542391	male	42	moderate	Pharyngeal swab
ITA_281	Italy	EPI_ISL_542392	male	87	severe	Pharyngeal swab
ITA_180	Italy	EPI_ISL_542413	male	23	mild	Pharyngeal swab
ITA_260	Italy	EPI_ISL_542420	male	76	mild	Pharyngeal swab
ITA_208	Italy	EPI_ISL_542423	male	41	moderate	Pharyngeal swab
ITA_272	Italy	EPI_ISL_542424	male	57	mild	Pharyngeal swab
ITA_74	Italy	EPI_ISL_542425	male	70	severe	Pharyngeal swab
ITA_291	Italy	EPI_ISL_542427	male	49	moderate	Pharyngeal swab
ITA_32	Italy	EPI_ISL_542428	male	73	mild	Pharyngeal swab
ITA_161	Italy	EPI_ISL_542429	male	64	moderate	Pharyngeal swab
ITA_188	Italy	EPI_ISL_542431	male	35	mild	Pharyngeal swab
ITA_277	Italy	EPI_ISL_542432	male	54	moderate	Pharyngeal swab
ITA_233	Italy	EPI_ISL_542433	male	81	moderate	Pharyngeal swab
ITA_31	Italy	EPI_ISL_542435	male	73	moderate	Pharyngeal swab
ITA_151	Italy	EPI_ISL_542440	male	79	severe	Pharyngeal swab
ITA_156	Italy	EPI_ISL_542443	male	80	moderate	Pharyngeal swab
ITA_235	Italy	EPI_ISL_547965	male	63	live	Pharyngeal swab
ITA_153	Italy	EPI_ISL_560407	male	3	live	Unknown
ITA_58	Italy	EPI_ISL_568579	male	74	live	Unknown
ITA_54	Italy	EPI_ISL_569867	male	41	live	Pharyngeal swab
ITA_37	Italy	EPI_ISL_569868	male	0.5	live	Pharyngeal swab
ITA_91	Italy	EPI_ISL_569869	male	23	live	Pharyngeal swab
ITA_268	Italy	EPI_ISL_569871	male	45	live	Pharyngeal swab
ITA_263	Italy	EPI_ISL_569875	male	59	released	Pharyngeal swab
ITA_148	Italy	EPI_ISL_569878	male	21	live	Pharyngeal swab
ITA_157	Italy	EPI_ISL_569883	male	76	released	Pharyngeal swab
ITA_190	Italy	EPI_ISL_569884	male	44	released	Pharyngeal swab
ITA_265	Italy	EPI_ISL_569885	male	96	deceased	Pharyngeal swab
ITA_295	Italy	EPI_ISL_590693	male	29	live	Unknown
ITA_228	Italy	EPI_ISL_590694	male	28	live	Unknown
ITA_216	Italy	EPI_ISL_590695	male	35	live	Unknown
ITA_94	Italy	EPI_ISL_590696	male	38	live	Unknown
ITA_2	Italy	EPI_ISL_590697	male	40	live	Unknown
ITA_99	Italy	EPI_ISL_590698	male	45	live	Unknown
ITA_236	Italy	EPI_ISL_603139	male	77	live	Unknown
ITA_284	Italy	EPI_ISL_603140	male	86	deceased	Unknown
ITA_6	Italy	EPI_ISL_603141	male	63	live	Unknown
ITA_241	Italy	EPI_ISL_603143	male	72	live	Unknown
ITA_191	Italy	EPI_ISL_603144	male	87	deceased	Unknown
ITA_212	Italy	EPI_ISL_603146	male	70	live	Unknown
ITA_9	Italy	EPI_ISL_603152	male	37	live	Unknown
ITA_140	Italy	EPI_ISL_603153	male	57	live	Unknown
ITA_210	Italy	EPI_ISL_603154	male	76	deceased	Unknown
ITA_251	Italy	EPI_ISL_603157	male	75	live	Unknown
ITA_234	Italy	EPI_ISL_603158	male	82	live	Unknown
ITA_34	Italy	EPI_ISL_603159	male	75	live	Unknown
ITA_22	Italy	EPI_ISL_603160	male	57	live	Unknown
ITA_209	Italy	EPI_ISL_603161	male	39	live	Unknown
ITA_122	Italy	EPI_ISL_603162	male	73	live	Unknown
ITA_44	Italy	EPI_ISL_603164	male	60	live	Unknown
ITA_26	Italy	EPI_ISL_603166	male	81	deceased	Unknown
ITA_197	Italy	EPI_ISL_603168	male	78	live	Unknown
ITA_297	Italy	EPI_ISL_603169	male	53	live	Unknown
ITA_199	Italy	EPI_ISL_603171	male	66	live	Unknown
ITA_183	Italy	EPI_ISL_603175	male	51	live	Unknown
ITA_273	Italy	EPI_ISL_609994	male	73	live	Lung tissue
ITA_143	Italy	EPI_ISL_609995	male	73	deceased	Lung tissue
ITA_63	Italy	EPI_ISL_609996	male	48	live	Pharyngeal swab
ITA_276	Italy	EPI_ISL_609997	male	77	live	Pharyngeal swab
ITA_185	Italy	EPI_ISL_613955	male	56	live	Pharyngeal swab
ITA_128	Italy	EPI_ISL_614397	male	95	deceased	Pharyngeal swab
ITA_103	Italy	EPI_ISL_614398	male	77	live	Pharyngeal swab
ITA_182	Italy	EPI_ISL_637109	male	89	deceased	Pharyngeal swab
ITA_239	Italy	EPI_ISL_649189	male	80	live	Pharyngeal swab
ITA_155	Italy	EPI_ISL_649190	male	76	live	Pharyngeal swab
ITA_53	Italy	EPI_ISL_649191	male	0.01	live	Pharyngeal swab
ITA_130	Italy	EPI_ISL_649938	male	70	asymptomatic	Pharyngeal swab
ITA_238	Italy	EPI_ISL_649940	male	75	asymptomatic	Pharyngeal swab
ITA_123	Italy	EPI_ISL_653764	male	69	asymptomatic	Pharyngeal swab
ITA_120	Italy	EPI_ISL_653766	male	47	asymptomatic	Pharyngeal swab
ITA_38	Italy	EPI_ISL_653768	male	65	live	Pharyngeal swab
ITA_225	Italy	EPI_ISL_653770	male	14	live	Pharyngeal swab
ITA_48	Italy	EPI_ISL_653771	male	17	live	Pharyngeal swab
ITA_227	Italy	EPI_ISL_653774	male	40	asymptomatic	Pharyngeal swab
ITA_160	Italy	EPI_ISL_653775	male	66	live	Pharyngeal swab
ITA_213	Italy	EPI_ISL_653776	male	55	live	Pharyngeal swab
ITA_133	Italy	EPI_ISL_653780	male	38	live	Pharyngeal swab
ITA_129	Italy	EPI_ISL_653781	male	47	asymptomatic	Pharyngeal swab
ITA_271	Italy	EPI_ISL_653782	male	39	live	Pharyngeal swab
ITA_107	Italy	EPI_ISL_653786	male	54	live	Pharyngeal swab
ITA_116	Italy	EPI_ISL_653788	male	15	asymptomatic	Pharyngeal swab
ITA_300	Italy	EPI_ISL_653790	male	64	asymptomatic	Pharyngeal swab
ITA_289	Italy	EPI_ISL_653792	male	37	asymptomatic	Pharyngeal swab
ITA_290	Italy	EPI_ISL_653793	male	26	asymptomatic	Pharyngeal swab
ITA_23	Italy	EPI_ISL_653796	male	20	live	Pharyngeal swab
ITA_230	Italy	EPI_ISL_653797	male	49	live	Pharyngeal swab
ITA_18	Italy	EPI_ISL_653798	male	14	live	Pharyngeal swab
ITA_165	Italy	EPI_ISL_653799	male	53	live	Pharyngeal swab
ITA_86	Italy	EPI_ISL_653802	male	81	asymptomatic	Pharyngeal swab
ITA_62	Italy	EPI_ISL_653807	male	36	live	Pharyngeal swab
ITA_50	Italy	EPI_ISL_653809	male	59	live	Pharyngeal swab
ITA_240	Italy	EPI_ISL_653810	male	47	live	Pharyngeal swab
ITA_247	Italy	EPI_ISL_653811	male	37	live	Pharyngeal swab
ITA_207	Italy	EPI_ISL_653812	male	59	live	Pharyngeal swab
ITA_158	Italy	EPI_ISL_653821	male	59	live	Pharyngeal swab
ITA_294	Italy	EPI_ISL_653822	male	60	live	Pharyngeal swab
ITA_243	Italy	EPI_ISL_653823	male	43	live	Pharyngeal swab
MDA_3	Moldova	EPI_ISL_516934	female	30	live	Pharyngeal swab
MDA_2	Moldova	EPI_ISL_516936	female	32	live	Pharyngeal swab
MDA_1	Moldova	EPI_ISL_516938	female	63	live	Pharyngeal swab
NOR_1	Norway	EPI_ISL_541970	male	40	home	Pharyngeal swab
POL_1	Poland	EPI_ISL_451646	female	69	live	unknown
POL_2	Poland	EPI_ISL_416488	male	66	live	unknown
POL_6	Poland	EPI_ISL_428209	male	48	live	Pharyngeal swab
POL_5	Poland	EPI_ISL_450746	male	78	live	unknown
POL_1	Poland	EPI_ISL_451644	male	88	live	unknown
POL_3	Poland	EPI_ISL_451645	male	94	live	unknown
POL_4	Poland	EPI_ISL_451647	male	33	quarantine	unknown
PRT_1	Portugal	EPI_ISL_413647	male	60	live	Pharyngeal swab
PRT_2	Portugal	EPI_ISL_413648	male	33	live	Pharyngeal swab
ROU_28	Romania	EPI_ISL_445243	female	44	live	Pharyngeal swab
ROU_12	Romania	EPI_ISL_447054	female	87	live	Pharyngeal swab
ROU_30	Romania	EPI_ISL_455468	female	75	live	Pharyngeal swab
ROU_9	Romania	EPI_ISL_455469	female	65	live	Pharyngeal swab
ROU_34	Romania	EPI_ISL_455470	female	23	live	Pharyngeal swab
ROU_25	Romania	EPI_ISL_455471	female	49	live	unknown
ROU_21	Romania	EPI_ISL_455474	female	46	live	Pharyngeal swab
ROU_18	Romania	EPI_ISL_455475	female	40	live	unknown
ROU_26	Romania	EPI_ISL_455477	female	26	live	Pharyngeal swab
ROU_31	Romania	EPI_ISL_455479	female	40	live	unknown
ROU_1	Romania	EPI_ISL_468135	female	42	released	Pharyngeal swab
ROU_14	Romania	EPI_ISL_468137	female	53	released	Pharyngeal swab
ROU_16	Romania	EPI_ISL_468138	female	46	released	Pharyngeal swab
ROU_15	Romania	EPI_ISL_468139	female	40	released	Pharyngeal swab
ROU_6	Romania	EPI_ISL_468141	female	35	released	Pharyngeal swab
ROU_24	Romania	EPI_ISL_468142	female	43	released	Pharyngeal swab
ROU_32	Romania	EPI_ISL_468144	female	55	released	Pharyngeal swab
ROU_22	Romania	EPI_ISL_468145	female	37	released	Pharyngeal swab
ROU_2	Romania	EPI_ISL_468148	female	79	released	Pharyngeal swab
ROU_27	Romania	EPI_ISL_468149	female	44	released	Pharyngeal swab
ROU_4	Romania	EPI_ISL_468150	female	32	released	Pharyngeal swab
ROU_20	Romania	EPI_ISL_468152	female	62	released	Pharyngeal swab
ROU_3	Romania	EPI_ISL_468155	female	58	released	Pharyngeal swab
ROU_13	Romania	EPI_ISL_468156	female	38	released	Pharyngeal swab
ROU_11	Romania	EPI_ISL_468157	female	69	released	Pharyngeal swab
ROU_10	Romania	EPI_ISL_468158	female	84	released	Pharyngeal swab
ROU_17	Romania	EPI_ISL_471417	female	45	live	Pharyngeal swab
ROU_5	Romania	EPI_ISL_471419	female	87	live	Pharyngeal swab
ROU_29	Romania	EPI_ISL_471420	female	47	live	unknown
ROU_33	Romania	EPI_ISL_471421	female	41	live	Pharyngeal swab
ROU_8	Romania	EPI_ISL_471423	female	68	live	Pharyngeal swab
ROU_19	Romania	EPI_ISL_471424	female	72	live	unknown
ROU_7	Romania	EPI_ISL_486855	female	43	released	unknown
ROU_23	Romania	EPI_ISL_486856	female	43	released	unknown
ROU_18	Romania	EPI_ISL_445220	male	51	live	Pharyngeal swab
ROU_13	Romania	EPI_ISL_455472	male	46	live	Pharyngeal swab
ROU_15	Romania	EPI_ISL_455473	male	46	live	unknown
ROU_4	Romania	EPI_ISL_455476	male	82	live	Pharyngeal swab
ROU_2	Romania	EPI_ISL_468134	male	27	released	Pharyngeal swab
ROU_8	Romania	EPI_ISL_468136	male	47	released	Pharyngeal swab
ROU_12	Romania	EPI_ISL_468140	male	57	released	Pharyngeal swab
ROU_1	Romania	EPI_ISL_468143	male	51	released	Pharyngeal swab
ROU_16	Romania	EPI_ISL_468146	male	50	released	Pharyngeal swab
ROU_17	Romania	EPI_ISL_468147	male	67	released	Pharyngeal swab
ROU_6	Romania	EPI_ISL_468151	male	65	released	Pharyngeal swab
ROU_14	Romania	EPI_ISL_468153	male	58	released	Pharyngeal swab
ROU_3	Romania	EPI_ISL_468154	male	57	released	Pharyngeal swab
ROU_7	Romania	EPI_ISL_471416	male	46	live	Pharyngeal swab
ROU_5	Romania	EPI_ISL_471418	male	52	live	unknown
ROU_11	Romania	EPI_ISL_471422	male	59	live	unknown
ROU_9	Romania	EPI_ISL_486834	male	69	released	unknown
ROU_10	Romania	EPI_ISL_486854	male	80	released	unknown
RUS_24	Russia	EPI_ISL_415710	female	30	live	Pharyngeal swab
RUS_58	Russia	EPI_ISL_420080	female	69	live	Pharyngeal swab
RUS_19	Russia	EPI_ISL_420081	female	70	live	Pharyngeal swab
RUS_52	Russia	EPI_ISL_427308	female	28	live	Pharyngeal swab
RUS_7	Russia	EPI_ISL_427309	female	71	live	Pharyngeal swab
RUS_72	Russia	EPI_ISL_427314	female	55	live	Pharyngeal swab
RUS_51	Russia	EPI_ISL_427320	female	54	live	Pharyngeal swab
RUS_14	Russia	EPI_ISL_427322	female	85	live	Pharyngeal swab
RUS_1	Russia	EPI_ISL_430067	female	64	live	Pharyngeal swab
RUS_69	Russia	EPI_ISL_430068	female	65	live	Pharyngeal swab
RUS_68	Russia	EPI_ISL_430072	female	52	live	Pharyngeal swab
RUS_35	Russia	EPI_ISL_430075	female	64	live	Pharyngeal swab
RUS_13	Russia	EPI_ISL_430078	female	72	live	Pharyngeal swab
RUS_70	Russia	EPI_ISL_430079	female	50	live	Pharyngeal swab
RUS_66	Russia	EPI_ISL_430080	female	64	live	Pharyngeal swab
RUS_16	Russia	EPI_ISL_430082	female	71	live	Pharyngeal swab
RUS_44	Russia	EPI_ISL_430084	female	26	live	Pharyngeal swab
RUS_38	Russia	EPI_ISL_430085	female	41	live	Pharyngeal swab
RUS_77	Russia	EPI_ISL_430087	female	56	live	Pharyngeal swab
RUS_39	Russia	EPI_ISL_430088	female	55	live	Pharyngeal swab
RUS_61	Russia	EPI_ISL_430100	female	33	live	Pharyngeal swab
RUS_31	Russia	EPI_ISL_430104	female	60	live	Pharyngeal swab
RUS_12	Russia	EPI_ISL_430106	female	71	live	Pharyngeal swab
RUS_64	Russia	EPI_ISL_430110	female	47	live	Pharyngeal swab
RUS_50	Russia	EPI_ISL_430111	female	67	live	Pharyngeal swab
RUS_26	Russia	EPI_ISL_450242	female	73	deceased	Pharyngeal swab
RUS_57	Russia	EPI_ISL_450245	female	87	deceased	Pharyngeal swab
RUS_76	Russia	EPI_ISL_450248	female	45	live	Pharyngeal swab
RUS_80	Russia	EPI_ISL_450249	female	42	live	Pharyngeal swab
RUS_25	Russia	EPI_ISL_450250	female	28	live	Pharyngeal swab
RUS_41	Russia	EPI_ISL_450260	female	60	live	Pharyngeal swab
RUS_79	Russia	EPI_ISL_450263	female	74	live	Pharyngeal swab
RUS_78	Russia	EPI_ISL_450271	female	57	live	Pharyngeal swab
RUS_4	Russia	EPI_ISL_450273	female	37	live	Pharyngeal swab
RUS_9	Russia	EPI_ISL_450276	female	54	live	Pharyngeal swab
RUS_47	Russia	EPI_ISL_450279	female	74	live	Pharyngeal swab
RUS_32	Russia	EPI_ISL_450280	female	63	live	Pharyngeal swab
RUS_56	Russia	EPI_ISL_450288	female	44	live	Pharyngeal swab
RUS_21	Russia	EPI_ISL_450291	female	75	live	Pharyngeal swab
RUS_83	Russia	EPI_ISL_450293	female	70	live	Pharyngeal swab
RUS_55	Russia	EPI_ISL_470897	female	55	live	Pharyngeal swab
RUS_30	Russia	EPI_ISL_470898	female	44	live	Pharyngeal swab
RUS_53	Russia	EPI_ISL_470901	female	67	live	Pharyngeal swab
RUS_43	Russia	EPI_ISL_486820	female	63	unknown	Pharyngeal swab
RUS_40	Russia	EPI_ISL_486824	female	25	live	Pharyngeal swab
RUS_33	Russia	EPI_ISL_486825	female	48	live	Pharyngeal swab
RUS_11	Russia	EPI_ISL_507206	female	70	live	Pharyngeal swab
RUS_5	Russia	EPI_ISL_507211	female	66	live	Pharyngeal swab
RUS_54	Russia	EPI_ISL_507212	female	59	live	Pharyngeal swab
RUS_45	Russia	EPI_ISL_507213	female	47	live	Pharyngeal swab
RUS_29	Russia	EPI_ISL_507215	female	41	live	Pharyngeal swab
RUS_46	Russia	EPI_ISL_507225	female	39	live	Pharyngeal swab
RUS_27	Russia	EPI_ISL_507293	female	57	live	unknown
RUS_63	Russia	EPI_ISL_534338	female	47	live	Pharyngeal swab
RUS_8	Russia	EPI_ISL_534342	female	49	unknown	Pharyngeal swab
RUS_6	Russia	EPI_ISL_534343	female	76	live	Pharyngeal swab
RUS_42	Russia	EPI_ISL_539299	female	51	live	Pharyngeal swab
RUS_17	Russia	EPI_ISL_566077	female	36	live	Pharyngeal swab
RUS_65	Russia	EPI_ISL_566079	female	73	live	Pharyngeal swab
RUS_74	Russia	EPI_ISL_566080	female	73	live	Pharyngeal swab
RUS_73	Russia	EPI_ISL_566081	female	59	live	Pharyngeal swab
RUS_71	Russia	EPI_ISL_566082	female	39	live	Pharyngeal swab
RUS_81	Russia	EPI_ISL_596228	female	47	live	Pharyngeal swab
RUS_48	Russia	EPI_ISL_596233	female	65	deceased	Lung tissue
RUS_60	Russia	EPI_ISL_596266	female	58	live	Pharyngeal swab
RUS_22	Russia	EPI_ISL_596267	female	44	live	Pharyngeal swab
RUS_49	Russia	EPI_ISL_602412	female	53	live	Pharyngeal swab
RUS_3	Russia	EPI_ISL_602414	female	61	live	Pharyngeal swab
RUS_75	Russia	EPI_ISL_602416	female	29	live	Pharyngeal swab
RUS_36	Russia	EPI_ISL_610228	female	73	live	Pharyngeal swab
RUS_20	Russia	EPI_ISL_610229	female	81	live	Pharyngeal swab
RUS_59	Russia	EPI_ISL_610232	female	25	live	Pharyngeal swab
RUS_82	Russia	EPI_ISL_610233	female	74	live	Pharyngeal swab
RUS_15	Russia	EPI_ISL_610237	female	90	live	Pharyngeal swab
RUS_37	Russia	EPI_ISL_610238	female	90	live	Pharyngeal swab
RUS_28	Russia	EPI_ISL_610242	female	42	live	Pharyngeal swab
RUS_23	Russia	EPI_ISL_610243	female	62	live	Pharyngeal swab
RUS_34	Russia	EPI_ISL_653922	female	82	live	Autopsy material
RUS_62	Russia	EPI_ISL_653923	female	88	live	Autopsy material
RUS_10	Russia	EPI_ISL_653929	female	76	live	Pharyngeal swab
RUS_67	Russia	EPI_ISL_653931	female	54	live	Pharyngeal swab
RUS_2	Russia	EPI_ISL_660435	female	84	live	Pharyngeal swab
RUS_18	Russia	EPI_ISL_660438	female	81	live	Pharyngeal swab
RUS_4	Russia	EPI_ISL_427307	male	26	live	Pharyngeal swab
RUS_15	Russia	EPI_ISL_427312	male	91	live	Pharyngeal swab
RUS_10	Russia	EPI_ISL_427319	male	34	live	Pharyngeal swab
RUS_35	Russia	EPI_ISL_427337	male	36	live	Pharyngeal swab
RUS_40	Russia	EPI_ISL_428852	male	44	live	Pharyngeal swab
RUS_17	Russia	EPI_ISL_430070	male	55	live	Pharyngeal swab
RUS_8	Russia	EPI_ISL_430071	male	47	live	Pharyngeal swab
RUS_41	Russia	EPI_ISL_430081	male	33	live	Pharyngeal swab
RUS_42	Russia	EPI_ISL_430108	male	25	live	Pharyngeal swab
RUS_33	Russia	EPI_ISL_436715	male	41	released	Pharyngeal swab
RUS_3	Russia	EPI_ISL_436717	male	44	released	Pharyngeal swab
RUS_31	Russia	EPI_ISL_450252	male	74	live	Pharyngeal swab
RUS_12	Russia	EPI_ISL_450261	male	54	live	Pharyngeal swab
RUS_23	Russia	EPI_ISL_450264	male	54	live	Pharyngeal swab
RUS_21	Russia	EPI_ISL_450272	male	46	live	Pharyngeal swab
RUS_38	Russia	EPI_ISL_450275	male	48	live	Pharyngeal swab
RUS_28	Russia	EPI_ISL_450277	male	63	live	Pharyngeal swab
RUS_29	Russia	EPI_ISL_450284	male	24	live	Pharyngeal swab
RUS_34	Russia	EPI_ISL_450286	male	70	live	Pharyngeal swab
RUS_1	Russia	EPI_ISL_450290	male	59	live	Pharyngeal swab
RUS_25	Russia	EPI_ISL_470896	male	24	live	Pharyngeal swab
RUS_36	Russia	EPI_ISL_479620	male	21	live	Pharyngeal swab
RUS_14	Russia	EPI_ISL_479624	male	57	live	Pharyngeal swab
RUS_2	Russia	EPI_ISL_486817	male	79	live	Pharyngeal swab
RUS_30	Russia	EPI_ISL_486821	male	54	live	Pharyngeal swab
RUS_39	Russia	EPI_ISL_486823	male	40	unknown	Pharyngeal swab
RUS_5	Russia	EPI_ISL_486827	male	43	live	Pharyngeal swab
RUS_27	Russia	EPI_ISL_486829	male	27	live	Pharyngeal swab
RUS_24	Russia	EPI_ISL_507209	male	53	live	Pharyngeal swab
RUS_26	Russia	EPI_ISL_507292	male	67	live	Pharyngeal swab
RUS_20	Russia	EPI_ISL_507294	male	46	live	unknown
RUS_19	Russia	EPI_ISL_534341	male	25	unknown	Pharyngeal swab
RUS_37	Russia	EPI_ISL_534346	male	44	live	Pharyngeal swab
RUS_11	Russia	EPI_ISL_596264	male	47	live	Pharyngeal swab
RUS_6	Russia	EPI_ISL_602415	male	58	live	Pharyngeal swab
RUS_9	Russia	EPI_ISL_610230	male	29	live	Pharyngeal swab
RUS_32	Russia	EPI_ISL_610234	male	20	live	Pharyngeal swab
RUS_7	Russia	EPI_ISL_610236	male	63	live	Pharyngeal swab
RUS_18	Russia	EPI_ISL_610240	male	88	live	Autopsy material
RUS_13	Russia	EPI_ISL_653925	male	71	live	Pharyngeal swab
RUS_16	Russia	EPI_ISL_653930	male	89	live	Pharyngeal swab
RUS_22	Russia	EPI_ISL_660434	male	59	live	Autopsy material
SVK_1	Slovakia	EPI_ISL_417877	female	53	live	Pharyngeal swab
SVK_3	Slovakia	EPI_ISL_417878	female	59	live	Pharyngeal swab
SVK_2	Slovakia	EPI_ISL_417880	female	34	live	Pharyngeal swab
SVK_1	Slovakia	EPI_ISL_417879	male	26	live	Pharyngeal swab	Travel history to Paris, France
ESP_91	Spain	EPI_ISL_417007	female	36	live	Pharyngeal swab
ESP_114	Spain	EPI_ISL_417010	female	58	live	Pharyngeal swab
ESP_113	Spain	EPI_ISL_418249	female	25	live	Pharyngeal swab
ESP_73	Spain	EPI_ISL_429256	female	71	released	Pharyngeal swab
ESP_89	Spain	EPI_ISL_452472	female	58	recovered	unknown
ESP_65	Spain	EPI_ISL_452484	female	65	recovered	unknown
ESP_21	Spain	EPI_ISL_452488	female	40	recovered	unknown
ESP_58	Spain	EPI_ISL_452492	female	72	deceased	unknown
ESP_105	Spain	EPI_ISL_452521	female	86	deceased	unknown
ESP_39	Spain	EPI_ISL_455314	female	37	live	Pharyngeal swab
ESP_85	Spain	EPI_ISL_455315	female	18	live	Pharyngeal swab
ESP_14	Spain	EPI_ISL_455323	female	21	live	Pharyngeal swab
ESP_35	Spain	EPI_ISL_455324	female	74	live	Pharyngeal swab
ESP_79	Spain	EPI_ISL_455325	female	26	live	Pharyngeal swab
ESP_22	Spain	EPI_ISL_455326	female	28	live	Pharyngeal swab
ESP_67	Spain	EPI_ISL_455328	female	67	live	Pharyngeal swab
ESP_57	Spain	EPI_ISL_455330	female	70	live	Pharyngeal swab
ESP_90	Spain	EPI_ISL_455331	female	58	live	Pharyngeal swab
ESP_8	Spain	EPI_ISL_455332	female	62	live	Pharyngeal swab
ESP_59	Spain	EPI_ISL_455333	female	37	live	Pharyngeal swab
ESP_15	Spain	EPI_ISL_455335	female	55	live	Pharyngeal swab
ESP_61	Spain	EPI_ISL_455339	female	36	live	Pharyngeal swab
ESP_13	Spain	EPI_ISL_455341	female	34	live	Pharyngeal swab
ESP_52	Spain	EPI_ISL_455343	female	48	live	Pharyngeal swab
ESP_23	Spain	EPI_ISL_455345	female	31	live	Pharyngeal swab
ESP_5	Spain	EPI_ISL_455348	female	52	live	Pharyngeal swab
ESP_93	Spain	EPI_ISL_455349	female	60	live	Pharyngeal swab
ESP_47	Spain	EPI_ISL_455350	female	43	live	Pharyngeal swab
ESP_94	Spain	EPI_ISL_455351	female	77	live	Pharyngeal swab
ESP_6	Spain	EPI_ISL_455353	female	88	live	Pharyngeal swab
ESP_32	Spain	EPI_ISL_455354	female	55	live	Pharyngeal swab
ESP_63	Spain	EPI_ISL_462447	female	57	Home	Pharyngeal swab
ESP_70	Spain	EPI_ISL_462449	female	42	live	Pharyngeal swab
ESP_102	Spain	EPI_ISL_462479	female	31	live	Pharyngeal swab
ESP_60	Spain	EPI_ISL_468765	female	67	recovered	unknown
ESP_101	Spain	EPI_ISL_468766	female	62	recovered	unknown
ESP_44	Spain	EPI_ISL_468768	female	61	recovered	unknown
ESP_107	Spain	EPI_ISL_468771	female	32	recovered	unknown
ESP_17	Spain	EPI_ISL_468772	female	82	recovered	unknown
ESP_25	Spain	EPI_ISL_468777	female	53	recovered	unknown
ESP_72	Spain	EPI_ISL_468782	female	84	recovered	unknown
ESP_9	Spain	EPI_ISL_468787	female	46	recovered	unknown
ESP_82	Spain	EPI_ISL_468788	female	39	recovered	unknown
ESP_116	Spain	EPI_ISL_468791	female	42	recovered	unknown
ESP_55	Spain	EPI_ISL_468795	female	57	recovered	unknown
ESP_3	Spain	EPI_ISL_468798	female	50	recovered	unknown
ESP_99	Spain	EPI_ISL_468801	female	36	recovered	unknown
ESP_42	Spain	EPI_ISL_468804	female	23	recovered	unknown
ESP_97	Spain	EPI_ISL_468805	female	47	recovered	unknown
ESP_80	Spain	EPI_ISL_468808	female	54	recovered	unknown
ESP_100	Spain	EPI_ISL_468810	female	60	recovered	unknown
ESP_30	Spain	EPI_ISL_468812	female	40	recovered	unknown
ESP_78	Spain	EPI_ISL_468814	female	59	recovered	unknown
ESP_74	Spain	EPI_ISL_468817	female	57	recovered	unknown
ESP_98	Spain	EPI_ISL_468829	female	57	recovered	unknown
ESP_106	Spain	EPI_ISL_468830	female	56	recovered	unknown
ESP_69	Spain	EPI_ISL_468832	female	44	recovered	unknown
ESP_111	Spain	EPI_ISL_468835	female	55	recovered	unknown
ESP_51	Spain	EPI_ISL_468849	female	42	recovered	unknown
ESP_1	Spain	EPI_ISL_468851	female	29	recovered	unknown
ESP_18	Spain	EPI_ISL_468857	female	44	recovered	unknown
ESP_110	Spain	EPI_ISL_468858	female	47	recovered	unknown
ESP_87	Spain	EPI_ISL_468859	female	53	recovered	unknown
ESP_31	Spain	EPI_ISL_483570	female	39	live	Pharyngeal swab
ESP_86	Spain	EPI_ISL_483572	female	62	live	unknown
ESP_68	Spain	EPI_ISL_483573	female	56	live	Pharyngeal swab
ESP_92	Spain	EPI_ISL_489833	female	62	live	unknown
ESP_45	Spain	EPI_ISL_490204	female	41	live	unknown
ESP_46	Spain	EPI_ISL_516193	female	30	live	Pharyngeal swab
ESP_83	Spain	EPI_ISL_539504	female	53	live	Pharyngeal swab
ESP_40	Spain	EPI_ISL_539507	female	94	live	Pharyngeal swab
ESP_81	Spain	EPI_ISL_539508	female	90	live	Pharyngeal swab
ESP_19	Spain	EPI_ISL_539509	female	96	live	Pharyngeal swab
ESP_2	Spain	EPI_ISL_539510	female	69	live	Pharyngeal swab
ESP_43	Spain	EPI_ISL_539512	female	46	live	Pharyngeal swab
ESP_7	Spain	EPI_ISL_539514	female	54	live	Pharyngeal swab
ESP_27	Spain	EPI_ISL_539515	female	83	live	Pharyngeal swab
ESP_56	Spain	EPI_ISL_539516	female	96	live	Pharyngeal swab
ESP_62	Spain	EPI_ISL_539521	female	59	live	Pharyngeal swab
ESP_84	Spain	EPI_ISL_539526	female	18	live	Pharyngeal swab
ESP_26	Spain	EPI_ISL_539534	female	84	live	Pharyngeal swab
ESP_33	Spain	EPI_ISL_539535	female	85	live	Pharyngeal swab
ESP_48	Spain	EPI_ISL_539536	female	52	live	Pharyngeal swab
ESP_4	Spain	EPI_ISL_539537	female	24	live	Pharyngeal swab
ESP_53	Spain	EPI_ISL_539541	female	82	live	Pharyngeal swab
ESP_96	Spain	EPI_ISL_539542	female	85	live	Pharyngeal swab
ESP_104	Spain	EPI_ISL_539543	female	26	live	Pharyngeal swab
ESP_49	Spain	EPI_ISL_539548	female	66	live	Pharyngeal swab
ESP_54	Spain	EPI_ISL_539549	female	87	live	Pharyngeal swab
ESP_20	Spain	EPI_ISL_539560	female	41	live	Pharyngeal swab
ESP_103	Spain	EPI_ISL_539561	female	59	live	Pharyngeal swab
ESP_12	Spain	EPI_ISL_539562	female	62	live	Pharyngeal swab
ESP_76	Spain	EPI_ISL_539563	female	44	live	Pharyngeal swab
ESP_108	Spain	EPI_ISL_539566	female	37	live	Pharyngeal swab
ESP_75	Spain	EPI_ISL_539567	female	8	live	Pharyngeal swab
ESP_10	Spain	EPI_ISL_539569	female	53	live	Pharyngeal swab
ESP_117	Spain	EPI_ISL_539570	female	46	live	Pharyngeal swab
ESP_88	Spain	EPI_ISL_539571	female	1	live	Pharyngeal swab
ESP_24	Spain	EPI_ISL_539572	female	35	live	Pharyngeal swab
ESP_71	Spain	EPI_ISL_578186	female	45	live	Lung tissue
ESP_38	Spain	EPI_ISL_578194	female	62	live	Pharyngeal swab
ESP_50	Spain	EPI_ISL_578196	female	62	live	Pharyngeal swab
ESP_11	Spain	EPI_ISL_578199	female	37	live	Pharyngeal swab
ESP_16	Spain	EPI_ISL_578200	female	55	live	Pharyngeal swab
ESP_29	Spain	EPI_ISL_578201	female	10	live	Pharyngeal swab
ESP_41	Spain	EPI_ISL_691681	female	4	live	Pharyngeal swab
ESP_112	Spain	EPI_ISL_691684	female	73	live	Pharyngeal swab
ESP_64	Spain	EPI_ISL_691686	female	28	live	Pharyngeal swab
ESP_115	Spain	EPI_ISL_691688	female	58	live	Pharyngeal swab
ESP_77	Spain	EPI_ISL_691691	female	17	live	Pharyngeal swab
ESP_95	Spain	EPI_ISL_691692	female	22	live	Pharyngeal swab
ESP_28	Spain	EPI_ISL_691693	female	78	live	Pharyngeal swab
ESP_36	Spain	EPI_ISL_691694	female	33	live	Pharyngeal swab
ESP_34	Spain	EPI_ISL_691696	female	44	live	Pharyngeal swab
ESP_109	Spain	EPI_ISL_691697	female	28	live	Pharyngeal swab
ESP_66	Spain	EPI_ISL_691698	female	75	live	Pharyngeal swab
ESP_37	Spain	EPI_ISL_691699	female	34	live	Pharyngeal swab
ESP_84	Spain	EPI_ISL_414495	male	61	live	Pharyngeal swab
ESP_119	Spain	EPI_ISL_414496	male	27	live	Pharyngeal swab
ESP_28	Spain	EPI_ISL_414598	male	89	live	unknown
ESP_110	Spain	EPI_ISL_416483	male	44	live	Pharyngeal swab
ESP_63	Spain	EPI_ISL_416485	male	58	live	Pharyngeal swab
ESP_106	Spain	EPI_ISL_416486	male	23	live	Pharyngeal swab
ESP_51	Spain	EPI_ISL_416487	male	50	live	Pharyngeal swab
ESP_109	Spain	EPI_ISL_416994	male	33	live	Pharyngeal swab
ESP_131	Spain	EPI_ISL_418243	male	64	live	Pharyngeal swab
ESP_42	Spain	EPI_ISL_418244	male	74	live	Pharyngeal swab
ESP_36	Spain	EPI_ISL_418245	male	76	live	Pharyngeal swab
ESP_92	Spain	EPI_ISL_418246	male	56	live	Pharyngeal swab
ESP_78	Spain	EPI_ISL_418247	male	18	live	Pharyngeal swab
ESP_39	Spain	EPI_ISL_418248	male	52	live	Pharyngeal swab
ESP_3	Spain	EPI_ISL_418250	male	23	live	Pharyngeal swab
ESP_120	Spain	EPI_ISL_418251	male	24	live	Pharyngeal swab
ESP_47	Spain	EPI_ISL_418252	male	79	live	Pharyngeal swab
ESP_144	Spain	EPI_ISL_418253	male	91	live	Pharyngeal swab
ESP_142	Spain	EPI_ISL_418268	male	89	live	Pharyngeal swab	Hospital Universitari Germans Trias i Pujol
ESP_93	Spain	EPI_ISL_419233	male	34	live	Pharyngeal swab
ESP_135	Spain	EPI_ISL_419234	male	57	live	Pharyngeal swab
ESP_125	Spain	EPI_ISL_419235	male	87	live	Pharyngeal swab
ESP_22	Spain	EPI_ISL_419236	male	88	live	Pharyngeal swab
ESP_117	Spain	EPI_ISL_419237	male	95	live	Pharyngeal swab
ESP_19	Spain	EPI_ISL_419238	male	31	live	Pharyngeal swab
ESP_145	Spain	EPI_ISL_419240	male	81	live	Pharyngeal swab
ESP_71	Spain	EPI_ISL_419709	male	89	live	Pharyngeal swab
ESP_16	Spain	EPI_ISL_452473	male	60	recovered	unknown
ESP_75	Spain	EPI_ISL_452480	male	76	deceased	unknown
ESP_139	Spain	EPI_ISL_452481	male	77	recovered	unknown
ESP_35	Spain	EPI_ISL_452487	male	76	live	unknown
ESP_33	Spain	EPI_ISL_452489	male	89	recovered	unknown
ESP_6	Spain	EPI_ISL_452496	male	73	recovered	unknown
ESP_31	Spain	EPI_ISL_452498	male	54	recovered	unknown
ESP_72	Spain	EPI_ISL_452500	male	65	recovered	unknown
ESP_95	Spain	EPI_ISL_452503	male	81	recovered	unknown
ESP_61	Spain	EPI_ISL_452509	male	44	recovered	unknown
ESP_73	Spain	EPI_ISL_452515	male	56	deceased	unknown
ESP_25	Spain	EPI_ISL_452534	male	30	recovered	unknown
ESP_115	Spain	EPI_ISL_455316	male	79	live	Pharyngeal swab
ESP_101	Spain	EPI_ISL_455317	male	75	live	Pharyngeal swab
ESP_89	Spain	EPI_ISL_455319	male	73	live	Pharyngeal swab
ESP_82	Spain	EPI_ISL_455320	male	70	live	Pharyngeal swab
ESP_76	Spain	EPI_ISL_455327	male	44	live	Pharyngeal swab
ESP_56	Spain	EPI_ISL_455329	male	65	live	Pharyngeal swab
ESP_116	Spain	EPI_ISL_455334	male	39	live	Pharyngeal swab
ESP_32	Spain	EPI_ISL_455336	male	41	live	Pharyngeal swab
ESP_44	Spain	EPI_ISL_455337	male	43	live	Pharyngeal swab
ESP_132	Spain	EPI_ISL_455338	male	41	live	Pharyngeal swab
ESP_138	Spain	EPI_ISL_455340	male	37	live	Pharyngeal swab
ESP_55	Spain	EPI_ISL_455342	male	54	live	Pharyngeal swab
ESP_48	Spain	EPI_ISL_455344	male	54	live	Pharyngeal swab
ESP_100	Spain	EPI_ISL_455346	male	47	live	Pharyngeal swab
ESP_122	Spain	EPI_ISL_455347	male	26	live	Pharyngeal swab
ESP_53	Spain	EPI_ISL_455352	male	83	live	Pharyngeal swab
ESP_26	Spain	EPI_ISL_462448	male	61	home	Pharyngeal swab	Health Worker
ESP_60	Spain	EPI_ISL_462477	male	35	live	Pharyngeal swab
ESP_21	Spain	EPI_ISL_462478	male	52	live	Pharyngeal swab
ESP_24	Spain	EPI_ISL_468767	male	55	recovered	unknown
ESP_105	Spain	EPI_ISL_468774	male	82	recovered	unknown
ESP_98	Spain	EPI_ISL_468775	male	43	recovered	unknown
ESP_52	Spain	EPI_ISL_468776	male	74	recovered	unknown
ESP_5	Spain	EPI_ISL_468780	male	63	recovered	unknown
ESP_87	Spain	EPI_ISL_468793	male	61	recovered	unknown
ESP_146	Spain	EPI_ISL_468800	male	35	recovered	unknown
ESP_104	Spain	EPI_ISL_468809	male	77	recovered	unknown
ESP_13	Spain	EPI_ISL_468815	male	39	recovered	unknown
ESP_90	Spain	EPI_ISL_468820	male	81	recovered	unknown
ESP_103	Spain	EPI_ISL_468834	male	25	recovered	unknown
ESP_113	Spain	EPI_ISL_468839	male	84	recovered	unknown
ESP_127	Spain	EPI_ISL_468841	male	39	recovered	unknown
ESP_40	Spain	EPI_ISL_468848	male	89	recovered	unknown
ESP_134	Spain	EPI_ISL_468855	male	30	recovered	unknown
ESP_147	Spain	EPI_ISL_471472	male	41	live	Pharyngeal swab
ESP_79	Spain	EPI_ISL_483059	male	89	live	Pharyngeal swab
ESP_9	Spain	EPI_ISL_483566	male	91	deceased	Pharyngeal swab	Hospital outbreak
ESP_10	Spain	EPI_ISL_483571	male	68	live	unknown
ESP_17	Spain	EPI_ISL_486876	male	86	live	unknown
ESP_140	Spain	EPI_ISL_489834	male	49	live	unknown
ESP_83	Spain	EPI_ISL_489835	male	75	live	unknown
ESP_29	Spain	EPI_ISL_490202	male	52	live	unknown
ESP_77	Spain	EPI_ISL_490203	male	58	live	unknown
ESP_136	Spain	EPI_ISL_490977	male	93	live	unknown
ESP_49	Spain	EPI_ISL_510689	male	89	live	Pharyngeal swab	Hospital Universitari Germans Trias i Pujol
ESP_141	Spain	EPI_ISL_535575	male	62	live	Pharyngeal swab	Medical worker
ESP_1	Spain	EPI_ISL_538552	male	62	live	Saliva
ESP_11	Spain	EPI_ISL_539497	male	59	live	Pharyngeal swab
ESP_37	Spain	EPI_ISL_539498	male	38	live	Pharyngeal swab
ESP_69	Spain	EPI_ISL_539499	male	62	live	Pharyngeal swab
ESP_96	Spain	EPI_ISL_539500	male	79	live	Pharyngeal swab
ESP_148	Spain	EPI_ISL_539501	male	82	live	Pharyngeal swab
ESP_128	Spain	EPI_ISL_539502	male	61	live	Pharyngeal swab
ESP_108	Spain	EPI_ISL_539503	male	53	live	Pharyngeal swab
ESP_64	Spain	EPI_ISL_539505	male	83	live	Pharyngeal swab
ESP_38	Spain	EPI_ISL_539506	male	64	live	Pharyngeal swab
ESP_130	Spain	EPI_ISL_539511	male	66	live	Pharyngeal swab
ESP_88	Spain	EPI_ISL_539513	male	61	live	Pharyngeal swab
ESP_112	Spain	EPI_ISL_539517	male	80	live	Pharyngeal swab
ESP_99	Spain	EPI_ISL_539518	male	88	live	Pharyngeal swab
ESP_27	Spain	EPI_ISL_539519	male	85	live	Pharyngeal swab
ESP_41	Spain	EPI_ISL_539520	male	25	live	Pharyngeal swab
ESP_97	Spain	EPI_ISL_539522	male	27	live	Pharyngeal swab
ESP_123	Spain	EPI_ISL_539523	male	0.2	live	Pharyngeal swab
ESP_126	Spain	EPI_ISL_539524	male	60	live	Pharyngeal swab
ESP_67	Spain	EPI_ISL_539527	male	53	live	Pharyngeal swab
ESP_43	Spain	EPI_ISL_539528	male	45	live	Pharyngeal swab
ESP_12	Spain	EPI_ISL_539529	male	51	live	Pharyngeal swab
ESP_59	Spain	EPI_ISL_539530	male	50	live	Pharyngeal swab
ESP_65	Spain	EPI_ISL_539532	male	29	live	Pharyngeal swab
ESP_2	Spain	EPI_ISL_539533	male	91	live	Pharyngeal swab
ESP_143	Spain	EPI_ISL_539539	male	84	live	Pharyngeal swab
ESP_66	Spain	EPI_ISL_539540	male	70	live	Pharyngeal swab
ESP_85	Spain	EPI_ISL_539544	male	40	live	Pharyngeal swab
ESP_30	Spain	EPI_ISL_539545	male	43	live	Pharyngeal swab
ESP_46	Spain	EPI_ISL_539546	male	27	live	Pharyngeal swab
ESP_68	Spain	EPI_ISL_539547	male	48	live	Pharyngeal swab
ESP_23	Spain	EPI_ISL_539550	male	37	live	Pharyngeal swab
ESP_107	Spain	EPI_ISL_539553	male	58	live	Pharyngeal swab
ESP_124	Spain	EPI_ISL_539554	male	97	live	Pharyngeal swab
ESP_45	Spain	EPI_ISL_539555	male	80	live	Pharyngeal swab
ESP_129	Spain	EPI_ISL_539556	male	76	live	Pharyngeal swab
ESP_14	Spain	EPI_ISL_539557	male	57	live	Pharyngeal swab
ESP_7	Spain	EPI_ISL_539558	male	57	live	Pharyngeal swab
ESP_133	Spain	EPI_ISL_539559	male	46	live	Pharyngeal swab
ESP_50	Spain	EPI_ISL_539564	male	89	live	Pharyngeal swab
ESP_57	Spain	EPI_ISL_539565	male	82	live	Pharyngeal swab
ESP_91	Spain	EPI_ISL_539568	male	29	live	Pharyngeal swab
ESP_114	Spain	EPI_ISL_578187	male	56	live	Lung tissue
ESP_8	Spain	EPI_ISL_578188	male	56	live	Pharyngeal swab
ESP_121	Spain	EPI_ISL_578189	male	82	live	Pharyngeal swab
ESP_62	Spain	EPI_ISL_578190	male	66	live	Pharyngeal swab
ESP_102	Spain	EPI_ISL_578191	male	85	live	Pharyngeal swab
ESP_111	Spain	EPI_ISL_578192	male	96	live	Pharyngeal swab
ESP_15	Spain	EPI_ISL_578193	male	72	live	Pharyngeal swab
ESP_18	Spain	EPI_ISL_578195	male	65	live	Pharyngeal swab
ESP_118	Spain	EPI_ISL_578197	male	6	live	Pharyngeal swab
ESP_54	Spain	EPI_ISL_578198	male	37	live	Pharyngeal swab
ESP_86	Spain	EPI_ISL_691682	male	74	live	Pharyngeal swab
ESP_74	Spain	EPI_ISL_691683	male	75	live	Pharyngeal swab
ESP_81	Spain	EPI_ISL_691685	male	79	live	Pharyngeal swab
ESP_4	Spain	EPI_ISL_691687	male	59	live	Pharyngeal swab
ESP_137	Spain	EPI_ISL_691689	male	7	live	Pharyngeal swab
ESP_58	Spain	EPI_ISL_691690	male	72	live	Pharyngeal swab
ESP_70	Spain	EPI_ISL_691695	male	34	live	Pharyngeal swab
ESP_20	Spain	EPI_ISL_691729	male	7	live	Pharyngeal swab
ESP_80	Spain	EPI_ISL_691730	male	7	live	Pharyngeal swab
ESP_34	Spain	EPI_ISL_691731	male	87	live	Pharyngeal swab
ESP_94	Spain	EPI_ISL_691732	male	88	live	Pharyngeal swab
SWE_2	Sweden	EPI_ISL_632312	female	53	live	Pharyngeal swab
SWE_1	Sweden	EPI_ISL_632313	female	53	live	Pharyngeal swab
SWE_1	Sweden	EPI_ISL_507008	male	53	unknown	unknown
CHE_1	Switzerland	EPI_ISL_548214	female	82	live	unknown
CHE_1	Switzerland	EPI_ISL_548208	male	91	live	unknown
UKR_3	Ukraine	EPI_ISL_576149	female	62	live	Pharyngeal swab
UKR_2	Ukraine	EPI_ISL_582509	female	57	live	Pharyngeal swab
UKR_1	Ukraine	EPI_ISL_582510	female	54	live	Pharyngeal swab
UKR_5	Ukraine	EPI_ISL_582511	female	57	live	Pharyngeal swab
UKR_4	Ukraine	EPI_ISL_654820	female	46	live	Pharyngeal swab
ITA_60	Ukraine	EPI_ISL_542256	male	81	severe	Pharyngeal swab
UKR_3	Ukraine	EPI_ISL_576146	male	69	live	Pharyngeal swab
UKR_2	Ukraine	EPI_ISL_576147	male	43	live	Pharyngeal swab
UKR_7	Ukraine	EPI_ISL_576148	male	44	live	Pharyngeal swab
UKR_4	Ukraine	EPI_ISL_582512	male	45	live	Pharyngeal swab
UKR_1	Ukraine	EPI_ISL_582513	male	56	live	unknown
UKR_5	Ukraine	EPI_ISL_654818	male	30	live	Pharyngeal swab
UKR_6	Ukraine	EPI_ISL_654819	male	73	live	Pharyngeal swab

## Sheet: Asia
Isolate/Country Code	Country	Accession	Gender	Age	Status	Specimen Source	Additional Information
BHR_1	Bahrain	EPI_ISL_636973	female	30	live	Pharyngeal swab
BGD_1	Bangladesh	EPI_ISL_450840	male	47	released	Pharyngeal swab
BGD_10	Bangladesh	EPI_ISL_445217	male	27	released	unknown
BGD_11	Bangladesh	EPI_ISL_603239	male	42	live	Pharyngeal swab
BGD_12	Bangladesh	EPI_ISL_450842	female	45	released	Pharyngeal swab
BGD_13	Bangladesh	EPI_ISL_603240	male	43	live	Pharyngeal swab	DNCC ; Asymptomatic
BGD_14	Bangladesh	EPI_ISL_603223	male	47	critical	Pharyngeal swab	ICU
BGD_15	Bangladesh	EPI_ISL_445214	female	34	released	Pharyngeal swab
BGD_16	Bangladesh	EPI_ISL_603238	male	50	live	Pharyngeal swab	Asymptomatic
BGD_17	Bangladesh	EPI_ISL_450843	female	27	released	Pharyngeal swab
BGD_18	Bangladesh	EPI_ISL_603241	male	39	critical	Pharyngeal swab	ICU
BGD_19	Bangladesh	EPI_ISL_603222	male	32	live	Pharyngeal swab	DNCC ; Asymptomatic
BGD_2	Bangladesh	EPI_ISL_445216	male	23	released	unknown
BGD_20	Bangladesh	EPI_ISL_445215	female	18	released	unknown
BGD_21	Bangladesh	EPI_ISL_450341	female	85	released	Pharyngeal swab
BGD_22	Bangladesh	EPI_ISL_458133	female	45	live	Pharyngeal swab
BGD_23	Bangladesh	EPI_ISL_450340	female	43	live	Pharyngeal swab
BGD_25	Bangladesh	EPI_ISL_514580	male	33	live	unknown
BGD_26	Bangladesh	EPI_ISL_445213	male	46	released	unknown
BGD_27	Bangladesh	EPI_ISL_450343	male	32	live	Pharyngeal swab
BGD_28	Bangladesh	EPI_ISL_514614	male	73	live	Pharyngeal swab
BGD_29	Bangladesh	EPI_ISL_450342	male	42	released	Pharyngeal swab
BGD_3	Bangladesh	EPI_ISL_514440	male	38	live	Pharyngeal swab
BGD_30	Bangladesh	EPI_ISL_514615	male	24	live	Pharyngeal swab
BGD_4	Bangladesh	EPI_ISL_603221	male	30	live	Pharyngeal swab
BGD_5	Bangladesh	EPI_ISL_450839	male	8	released	Pharyngeal swab
BGD_6	Bangladesh	EPI_ISL_514613	male	51	live	Pharyngeal swab
BGD_7	Bangladesh	EPI_ISL_514434	male	30	live	Pharyngeal swab
BGD_8	Bangladesh	EPI_ISL_450841	male	44	released	Pharyngeal swab
BGD_9	Bangladesh	EPI_ISL_514441	male	41	live	Pharyngeal swab
KHM_1	Cambodia	EPI_ISL_411902	male	60	recovered	Pharyngeal swab	Patient from Wuhan, China
CHN_1	China	EPI_ISL_451330	female	30	released	Pharyngeal swab
CHN_10	China	EPI_ISL_418991	male	62	live	Anal fluid
CHN_100	China	EPI_ISL_419252	male	26	live	unknown
CHN_101	China	EPI_ISL_419231	female	83	live	unknown
CHN_102	China	EPI_ISL_417193	male	22	released	unknown
CHN_103	China	EPI_ISL_451351	male	37	released	Sputum
CHN_104	China	EPI_ISL_539807	male	49	released	Pharyngeal swab
CHN_105	China	EPI_ISL_421226	female	41	live	Pharyngeal swab	Contact to patient from Wuhan
CHN_106	China	EPI_ISL_402128	female	52	recovered	Lung tissue	Outbreak-12/22/2019
CHN_107	China	EPI_ISL_455465	male	51	live	unknown
CHN_108	China	EPI_ISL_476801	female	61	released	Pharyngeal swab
CHN_109	China	EPI_ISL_451370	male	9	released	Anal fluid
CHN_11	China	EPI_ISL_421224	male	46	live	Pharyngeal swab
CHN_110	China	EPI_ISL_451324	male	42	released	Pharyngeal swab
CHN_111	China	EPI_ISL_452356	male	21	live	Pharyngeal swab	Traveled from London, United Kingdom
CHN_112	China	EPI_ISL_430727	male	38	released	Pharyngeal swab
CHN_113	China	EPI_ISL_452339	female	17	live	Pharyngeal swab	Traveled from Seattle, USA
CHN_114	China	EPI_ISL_419244	female	80	live	unknown
CHN_115	China	EPI_ISL_414691	male	79	live	Pharyngeal swab
CHN_116	China	EPI_ISL_416042	male	31	live	Sputum
CHN_117	China	EPI_ISL_451397	male	64	released	Pharyngeal swab
CHN_118	China	EPI_ISL_431780	female	62	live	Pharyngeal swab
CHN_119	China	EPI_ISL_408486	male	50	recovered	Sputum
CHN_12	China	EPI_ISL_451372	male	75	released	Sputum
CHN_120	China	EPI_ISL_402132	female	49	live	Lung tissue
CHN_121	China	EPI_ISL_421230	female	34	live	Pharyngeal swab	Contact to patient from Wuhan
CHN_122	China	EPI_ISL_482583	male	23	live	Anal fluid	Contact with imported cases
CHN_123	China	EPI_ISL_536411	male	23	released	Sputum
CHN_124	China	EPI_ISL_451366	female	67	released	Sputum
CHN_125	China	EPI_ISL_419227	male	54	live	unknown
CHN_127	China	EPI_ISL_429854	female	47	live	Sputum
CHN_128	China	EPI_ISL_419248	male	24	live	unknown
CHN_129	China	EPI_ISL_452335	female	20	live	Pharyngeal swab	Traveled from London, United Kingdom
CHN_13	China	EPI_ISL_476803	male	25	released	unknown
CHN_130	China	EPI_ISL_539811	male	31	released	Sputum
CHN_131	China	EPI_ISL_451347	female	48	released	Sputum
CHN_132	China	EPI_ISL_417185	male	70	released	unknown
CHN_133	China	EPI_ISL_575329	female	79	live	Sputum
CHN_134	China	EPI_ISL_451328	male	9	released	Pharyngeal swab
CHN_135	China	EPI_ISL_431118	female	65	live	Pharyngeal swab
CHN_136	China	EPI_ISL_452360	male	19	live	Pharyngeal swab	Asia / China / Wuhan
CHN_137	China	EPI_ISL_451312	male	23	released	Pharyngeal swab
CHN_138	China	EPI_ISL_451380	male	32	released	Pharyngeal swab
CHN_139	China	EPI_ISL_452341	female	24	live	Pharyngeal swab	Traveled from Mexico City, Mexico
CHN_14	China	EPI_ISL_455467	female	53	live	unknown
CHN_140	China	EPI_ISL_416474	male	30	live	Anal fluid
CHN_141	China	EPI_ISL_419253	female	70	live	unknown
CHN_142	China	EPI_ISL_430730	male	47	released	Pharyngeal swab
CHN_143	China	EPI_ISL_451333	female	43	released	Pharyngeal swab
CHN_144	China	EPI_ISL_539806	male	56	released	Pharyngeal swab
CHN_145	China	EPI_ISL_451350	male	55	released	Sputum
CHN_146	China	EPI_ISL_455464	female	45	live	unknown
CHN_147	China	EPI_ISL_451371	female	51	released	Sputum
CHN_148	China	EPI_ISL_402129	male	40	live	Lung tissue
CHN_149	China	EPI_ISL_421227	male	31	live	Lung tissue	Contact to patient from Wuhan
CHN_15	China	EPI_ISL_539805	male	30	released	Pharyngeal swab
CHN_150	China	EPI_ISL_452357	female	29	live	Pharyngeal swab	Asia / China / Wuhan
CHN_151	China	EPI_ISL_452338	female	17	live	Pharyngeal swab	Traveled from New York, USA
CHN_152	China	EPI_ISL_419245	female	76	live	unknown
CHN_153	China	EPI_ISL_430726	male	95	released	Pharyngeal swab
CHN_154	China	EPI_ISL_417188	male	68	released	unknown
CHN_155	China	EPI_ISL_451325	female	37	released	Pharyngeal swab
CHN_156	China	EPI_ISL_408487	female	30	recovered	Pharyngeal swab
CHN_157	China	EPI_ISL_431781	male	63	live	Pharyngeal swab
CHN_158	China	EPI_ISL_451396	male	38	released	Pharyngeal swab
CHN_159	China	EPI_ISL_418815	male	23	live	unknown
CHN_16	China	EPI_ISL_451353	male	60	released	Pharyngeal swab
CHN_160	China	EPI_ISL_451367	male	33	released	Sputum
CHN_161	China	EPI_ISL_421231	female	40	live	Pharyngeal swab
CHN_162	China	EPI_ISL_482582	female	26	live	Pharyngeal swab
CHN_163	China	EPI_ISL_444969	female	21	live	Sputum
CHN_164	China	EPI_ISL_417184	male	24	released	unknown
CHN_165	China	EPI_ISL_417179	male	75	live	unknown
CHN_166	China	EPI_ISL_451346	female	31	released	Sputum
CHN_167	China	EPI_ISL_451329	female	67	released	Pharyngeal swab
CHN_168	China	EPI_ISL_419226	female	41	released	unknown
CHN_169	China	EPI_ISL_419249	female	49	live	unknown
CHN_17	China	EPI_ISL_431782	female	69	live	Pharyngeal swab
CHN_170	China	EPI_ISL_452334	male	23	live	Pharyngeal swab
CHN_171	China	EPI_ISL_429855	female	54	live	Sputum
CHN_173	China	EPI_ISL_412386	male	55	released	cerebrospinal fluid
CHN_174	China	EPI_ISL_451319	female	33	released	Pharyngeal swab
CHN_175	China	EPI_ISL_455463	male	75	live	unknown
CHN_176	China	EPI_ISL_451376	male	31	released	Pharyngeal swab
CHN_177	China	EPI_ISL_539820	male	33	released	Pharyngeal swab
CHN_178	China	EPI_ISL_419216	male	52	live	unknown
CHN_179	China	EPI_ISL_417195	female	50	released	unknown
CHN_18	China	EPI_ISL_451368	female	87	released	Sputum
CHN_180	China	EPI_ISL_451357	male	65	released	Sputum
CHN_181	China	EPI_ISL_451338	female	56	released	Pharyngeal swab
CHN_182	China	EPI_ISL_406970	male	33	live	Sputum	Patient return form Wuhan, China
CHN_183	China	EPI_ISL_452346	female	48	live	Pharyngeal swab	Traveled from Madrid, Spain
CHN_184	China	EPI_ISL_416473	male	53	live	Sputum
CHN_185	China	EPI_ISL_452329	female	29	live	Pharyngeal swab	Traveled from Munich, Germany
CHN_186	China	EPI_ISL_430737	male	31	released	Pharyngeal swab
CHN_187	China	EPI_ISL_451334	female	61	released	Pharyngeal swab
CHN_188	China	EPI_ISL_451315	female	50	released	Pharyngeal swab
CHN_189	China	EPI_ISL_451387	male	81	released	Pharyngeal swab
CHN_19	China	EPI_ISL_451395	male	46	released	Pharyngeal swab
CHN_190	China	EPI_ISL_451341	male	36	released	Pharyngeal swab
CHN_191	China	EPI_ISL_539817	male	45	released	Pharyngeal swab
CHN_192	China	EPI_ISL_417183	female	63	released	unknown
CHN_193	China	EPI_ISL_419221	male	71	live	unknown
CHN_194	China	EPI_ISL_430742	male	53	released	Pharyngeal swab
CHN_195	China	EPI_ISL_452333	male	25	live	Pharyngeal swab	Traveled from Milan, Italy
CHN_196	China	EPI_ISL_429852	male	71	live	Sputum
CHN_197	China	EPI_ISL_451360	female	33	released	Pharyngeal swab
CHN_198	China	EPI_ISL_421236	male	47	live	Pharyngeal swab	Family-cluster transmission
CHN_199	China	EPI_ISL_482585	male	21	live	Pharyngeal swab	Infected in France
CHN_2	China	EPI_ISL_539809	male	38	released	Sputum
CHN_20	China	EPI_ISL_539851	male	93	released	Pharyngeal swab
CHN_200	China	EPI_ISL_482578	male	46	live	Pharyngeal swab	Contact with imported cases
CHN_201	China	EPI_ISL_408480	male	56	recovered	Sputum
CHN_202	China	EPI_ISL_416044	male	32	live	Sputum
CHN_203	China	EPI_ISL_404228	male	47	live	Sputum	Traveled from Wuhan, China
CHN_204	China	EPI_ISL_451391	male	50	released	Pharyngeal swab
CHN_205	China	EPI_ISL_452350	female	27	live	Pharyngeal swab	Traveled from Budapest, Hungary
CHN_206	China	EPI_ISL_419242	male	75	live	unknown
CHN_207	China	EPI_ISL_431180	male	56	live	Pharyngeal swab
CHN_208	China	EPI_ISL_451322	male	75	released	Pharyngeal swab
CHN_209	China	EPI_ISL_421221	male	21	live	Pharyngeal swab	Traveled from United Kingdom
CHN_21	China	EPI_ISL_406593	male	66	live	Lung tissue
CHN_210	China	EPI_ISL_419217	female	62	live	unknown
CHN_211	China	EPI_ISL_455462	female	24	live	unknown
CHN_212	China	EPI_ISL_415709	male	36	live	Sputum
CHN_213	China	EPI_ISL_451318	male	50	released	Pharyngeal swab
CHN_214	China	EPI_ISL_539821	male	33	released	Sputum
CHN_215	China	EPI_ISL_451377	female	42	released	Pharyngeal swab
CHN_216	China	EPI_ISL_451356	female	61	released	Sputum
CHN_217	China	EPI_ISL_451339	male	15	released	Pharyngeal swab
CHN_218	China	EPI_ISL_451335	male	45	released	Pharyngeal swab
CHN_219	China	EPI_ISL_452347	male	28	live	Pharyngeal swab	Traveled from Athens, Greece
CHN_22	China	EPI_ISL_402130	male	56	live	Lung tissue
CHN_220	China	EPI_ISL_430736	male	53	released	Pharyngeal swab
CHN_221	China	EPI_ISL_452328	male	27	live	Pharyngeal swab	Traveled from Islamabad, Pakistan
CHN_222	China	EPI_ISL_451314	female	48	released	Pharyngeal swab
CHN_223	China	EPI_ISL_451386	female	33	released	Pharyngeal swab
CHN_224	China	EPI_ISL_431292	female	32	live	Pharyngeal swab
CHN_225	China	EPI_ISL_429853	male	50	live	Sputum
CHN_226	China	EPI_ISL_452332	male	30	live	Pharyngeal swab	Traveled from Tehran, Iran
CHN_227	China	EPI_ISL_417182	female	56	released	unknown
CHN_228	China	EPI_ISL_412459	male	47	live	Lung tissue	Patient infected in Wuhan, South China seafood market related
CHN_229	China	EPI_ISL_539816	male	53	released	Sputum
CHN_23	China	EPI_ISL_408484	male	35	recovered	Lung tissue
CHN_230	China	EPI_ISL_451340	male	44	released	Pharyngeal swab
CHN_231	China	EPI_ISL_482579	male	17	live	Pharyngeal swab	Infected in U.K.
CHN_232	China	EPI_ISL_482584	female	21	live	Pharyngeal swab	Infected in France
CHN_233	China	EPI_ISL_497950	male	50	live	unknown
CHN_234	China	EPI_ISL_451361	female	36	released	Pharyngeal swab
CHN_235	China	EPI_ISL_451390	male	50	released	Pharyngeal swab
CHN_236	China	EPI_ISL_408481	female	44	recovered	Pharyngeal swab
CHN_237	China	EPI_ISL_482575	female	39	live	Pharyngeal swab	Contact with imported cases
CHN_238	China	EPI_ISL_451323	male	37	released	Pharyngeal swab
CHN_239	China	EPI_ISL_452351	male	10	live	Pharyngeal swab	Traveled from Milan, Italy
CHN_24	China	EPI_ISL_451326	male	36	released	Pharyngeal swab
CHN_240	China	EPI_ISL_419243	female	96	live	unknown
CHN_241	China	EPI_ISL_451355	female	54	released	Sputum
CHN_242	China	EPI_ISL_539803	male	22	released	Pharyngeal swab
CHN_243	China	EPI_ISL_452327	female	40	live	Pharyngeal swab	Traveled from Vienna, Austria
CHN_244	China	EPI_ISL_430739	male	47	released	Pharyngeal swab
CHN_245	China	EPI_ISL_452348	male	28	live	Pharyngeal swab	Traveled from Budapest, Hungary
CHN_246	China	EPI_ISL_539822	male	48	released	Sputum
CHN_247	China	EPI_ISL_451389	male	25	released	Pharyngeal swab
CHN_248	China	EPI_ISL_451374	female	49	released	Pharyngeal swab
CHN_249	China	EPI_ISL_455461	male	31	live	unknown
CHN_25	China	EPI_ISL_417176	male	39	released	unknown
CHN_250	China	EPI_ISL_419214	female	63	released	unknown
CHN_251	China	EPI_ISL_421222	female	37	live	Pharyngeal swab	Traveled from USA
CHN_252	China	EPI_ISL_419218	male	59	released	unknown
CHN_253	China	EPI_ISL_451385	male	50	released	Pharyngeal swab
CHN_254	China	EPI_ISL_451378	female	19	released	Pharyngeal swab
CHN_255	China	EPI_ISL_451317	female	74	released	Pharyngeal swab
CHN_256	China	EPI_ISL_430735	male	38	released	Pharyngeal swab
CHN_257	China	EPI_ISL_452344	female	22	live	Pharyngeal swab	Traveled from Madrid, Spain
CHN_259	China	EPI_ISL_451336	male	23	released	Pharyngeal swab
CHN_26	China	EPI_ISL_451349	male	49	released	Sputum
CHN_260	China	EPI_ISL_451359	male	34	released	Pharyngeal swab
CHN_261	China	EPI_ISL_451362	male	55	released	Pharyngeal swab
CHN_262	China	EPI_ISL_421234	male	51	live	Pharyngeal swab	Traveled from Wuhan, China
CHN_263	China	EPI_ISL_416425	male	0.4	live	Pharyngeal swab
CHN_264	China	EPI_ISL_417181	female	28	released	unknown
CHN_265	China	EPI_ISL_539815	male	63	released	Sputum
CHN_266	China	EPI_ISL_451343	male	52	released	Pharyngeal swab
CHN_267	China	EPI_ISL_452331	female	37	live	Pharyngeal swab	Traveled from Boston, USA
CHN_268	China	EPI_ISL_495459	male	46	live	Sputum
CHN_27	China	EPI_ISL_407313	male	32	live	Sputum	Traveled from Wuhan, China
CHN_270	China	EPI_ISL_419223	male	37	live	unknown
CHN_271	China	EPI_ISL_430740	male	30	released	Pharyngeal swab
CHN_272	China	EPI_ISL_430723	male	47	released	Pharyngeal swab
CHN_273	China	EPI_ISL_452352	female	47	live	Pharyngeal swab	Traveled from Milan, Italy
CHN_274	China	EPI_ISL_451320	male	34	released	Pharyngeal swab
CHN_275	China	EPI_ISL_539819	male	45	released	Sputum
CHN_276	China	EPI_ISL_482576	female	39	live	Pharyngeal swab	Contact with imported cases
CHN_277	China	EPI_ISL_406595	male	63	live	Lung tissue
CHN_278	China	EPI_ISL_408482	male	37	recovered	Sputum
CHN_279	China	EPI_ISL_431779	male	17	live	Pharyngeal swab
CHN_28	China	EPI_ISL_430725	male	23	released	Pharyngeal swab
CHN_280	China	EPI_ISL_431784	female	37	live	Pharyngeal swab
CHN_281	China	EPI_ISL_451393	female	78	released	Pharyngeal swab
CHN_282	China	EPI_ISL_416046	male	34	live	Sputum
CHN_283	China	EPI_ISL_430738	male	47	released	Pharyngeal swab
CHN_284	China	EPI_ISL_613457	female	49	released	Pharyngeal swab
CHN_285	China	EPI_ISL_452349	female	28	live	Pharyngeal swab	Traveled from Budapest, Hungary
CHN_286	China	EPI_ISL_431240	female	33	live	Pharyngeal swab
CHN_287	China	EPI_ISL_451354	female	22	released	Anal fluid
CHN_288	China	EPI_ISL_419215	female	86	released	unknown
CHN_289	China	EPI_ISL_421223	female	53	live	Pharyngeal swab
CHN_29	China	EPI_ISL_419246	female	57	live	unknown
CHN_290	China	EPI_ISL_476804	female	51	released	Pharyngeal swab
CHN_291	China	EPI_ISL_451375	male	49	released	Pharyngeal swab
CHN_292	China	EPI_ISL_451388	female	67	released	Pharyngeal swab
CHN_293	China	EPI_ISL_539823	male	63	released	Sputum
CHN_294	China	EPI_ISL_455460	male	26	live	unknown
CHN_295	China	EPI_ISL_451379	male	47	released	Pharyngeal swab
CHN_296	China	EPI_ISL_451384	male	40	released	Pharyngeal swab
CHN_297	China	EPI_ISL_451316	male	31	released	Pharyngeal swab
CHN_298	China	EPI_ISL_452364	male	37	live	Pharyngeal swab
CHN_299	China	EPI_ISL_419219	female	60	live	unknown
CHN_3	China	EPI_ISL_420455	male	43	live	unknown
CHN_30	China	EPI_ISL_419229	female	32	live	unknown
CHN_300	China	EPI_ISL_451337	male	45	released	Pharyngeal swab
CHN_302	China	EPI_ISL_451358	female	84	released	Pharyngeal swab
CHN_303	China	EPI_ISL_430734	male	38	released	Pharyngeal swab
CHN_304	China	EPI_ISL_452345	male	42	live	Pharyngeal swab	Traveled from Barcelona, Spain
CHN_305	China	EPI_ISL_482586	female	15	live	Pharyngeal swab	Traveled from Wuhan, China
CHN_306	China	EPI_ISL_421235	female	45	live	Pharyngeal swab	Infected in U.S.A.
CHN_307	China	EPI_ISL_451363	female	47	released	Sputum
CHN_308	China	EPI_ISL_404227	male	46	live	Sputum
CHN_31	China	EPI_ISL_452354	female	18	live	Pharyngeal swab	Traveled from Wuhan, China
CHN_310	China	EPI_ISL_452330	male	40	live	Pharyngeal swab	Traveled from Milan, Italy
CHN_311	China	EPI_ISL_430741	male	37	released	Pharyngeal swab
CHN_312	China	EPI_ISL_419222	female	37	live	unknown
CHN_313	China	EPI_ISL_451342	female	56	released	Pharyngeal swab
CHN_314	China	EPI_ISL_539814	male	72	released	Sputum
CHN_315	China	EPI_ISL_451321	female	18	released	Pharyngeal swab
CHN_316	China	EPI_ISL_539818	male	58	released	Sputum
CHN_317	China	EPI_ISL_430722	male	23	released	Pharyngeal swab
CHN_318	China	EPI_ISL_419241	female	70	live	unknown
CHN_319	China	EPI_ISL_452353	female	11	live	Pharyngeal swab	Traveled from Milan, Italy
CHN_32	China	EPI_ISL_430729	male	30	released	Pharyngeal swab
CHN_320	China	EPI_ISL_434534	male	32	recovered	Lung tissue
CHN_321	China	EPI_ISL_451392	female	74	released	Pharyngeal swab
CHN_322	China	EPI_ISL_431785	male	47	live	Pharyngeal swab
CHN_323	China	EPI_ISL_416047	male	71	live	Sputum
CHN_324	China	EPI_ISL_415711	female	25	live	Sputum
CHN_325	China	EPI_ISL_482577	male	29	live	Pharyngeal swab	Infected in France
CHN_326	China	EPI_ISL_408483	female	56	recovered	Lung tissue
CHN_327	China	EPI_ISL_406594	male	62	live	Lung tissue
CHN_33	China	EPI_ISL_452337	male	21	live	Pharyngeal swab
CHN_35	China	EPI_ISL_452358	female	3	live	Pharyngeal swab
CHN_36	China	EPI_ISL_419225	male	37	released	unknown
CHN_37	China	EPI_ISL_417187	female	91	live	unknown
CHN_38	China	EPI_ISL_451345	male	20	released	Sputum
CHN_39	China	EPI_ISL_539813	female	27	released	Pharyngeal swab
CHN_4	China	EPI_ISL_430733	female	63	released	Pharyngeal swab
CHN_40	China	EPI_ISL_482581	male	12	live	Pharyngeal swab	Infected in Switzerland
CHN_41	China	EPI_ISL_421232	male	35	live	Pharyngeal swab	Contact to patient from Wuhan
CHN_42	China	EPI_ISL_408488	male	37	recovered	Lung tissue
CHN_43	China	EPI_ISL_451364	female	63	released	Sputum
CHN_44	China	EPI_ISL_451399	male	38	released	Pharyngeal swab
CHN_45	China	EPI_ISL_419251	female	29	live	unknown
CHN_46	China	EPI_ISL_430732	female	68	released	Pharyngeal swab
CHN_47	China	EPI_ISL_452343	female	43	live	Pharyngeal swab
CHN_48	China	EPI_ISL_451331	female	38	released	Pharyngeal swab
CHN_49	China	EPI_ISL_575330	male	53	live	Pharyngeal swab
CHN_5	China	EPI_ISL_419250	male	80	live	unknown
CHN_50	China	EPI_ISL_539808	male	48	released	Pharyngeal swab
CHN_51	China	EPI_ISL_452362	female	33	live	Pharyngeal swab
CHN_52	China	EPI_ISL_402127	male	32	live	Lung tissue
CHN_53	China	EPI_ISL_421229	female	34	live	Lung tissue	Contact to patient from Wuhan
CHN_54	China	EPI_ISL_417443	male	39	released	unknown	Hospital
CHN_55	China	EPI_ISL_451382	female	62	released	Pharyngeal swab
CHN_56	China	EPI_ISL_476802	male	58	released	Pharyngeal swab
CHN_57	China	EPI_ISL_451373	female	22	released	Pharyngeal swab
CHN_58	China	EPI_ISL_455466	male	66	live	unknown
CHN_59	China	EPI_ISL_419213	male	69	live	unknown
CHN_6	China	EPI_ISL_452342	male	28	live	Pharyngeal swab	Traveled from Oslo, Norway
CHN_60	China	EPI_ISL_418990	female	38	live	Anal fluid
CHN_61	China	EPI_ISL_421225	male	62	live	Pharyngeal swab	Traveled from Wuhan, China
CHN_62	China	EPI_ISL_451076	female	42	released	unknown
CHN_63	China	EPI_ISL_536793	female	36	released	Sputum
CHN_64	China	EPI_ISL_417190	female	57	released	unknown
CHN_65	China	EPI_ISL_451352	female	79	released	Pharyngeal swab
CHN_66	China	EPI_ISL_539804	male	59	released	Sputum
CHN_67	China	EPI_ISL_419232	male	68	live	unknown
CHN_68	China	EPI_ISL_408485	male	34	recovered	Pharyngeal swab
CHN_69	China	EPI_ISL_406592	female	65	live	Lung tissue
CHN_7	China	EPI_ISL_451383	female	76	released	Pharyngeal swab
CHN_70	China	EPI_ISL_451394	male	47	released	Pharyngeal swab
CHN_71	China	EPI_ISL_451369	female	54	released	Anal fluid
CHN_72	China	EPI_ISL_431783	female	34	live	Pharyngeal swab
CHN_73	China	EPI_ISL_539850	male	33	released	Pharyngeal swab
CHN_74	China	EPI_ISL_419247	female	55	live	unknown
CHN_75	China	EPI_ISL_430724	female	37	released	Pharyngeal swab
CHN_76	China	EPI_ISL_419228	female	46	released	unknown
CHN_77	China	EPI_ISL_452355	male	20	live	Pharyngeal swab	Traveled from London, United Kingdom
CHN_78	China	EPI_ISL_451327	male	47	released	Pharyngeal swab
CHN_79	China	EPI_ISL_451348	male	0.1	released	Anal fluid
CHN_8	China	EPI_ISL_452363	male	34	live	Pharyngeal swab	Asia / China / Wuhan
CHN_80	China	EPI_ISL_417177	male	56	released	unknown
CHN_81	China	EPI_ISL_539812	male	33	released	Pharyngeal swab
CHN_82	China	EPI_ISL_451344	male	36	released	Pharyngeal swab
CHN_84	China	EPI_ISL_452336	female	22	live	Pharyngeal swab	Traveled from Paris, France
CHN_85	China	EPI_ISL_430728	male	37	released	Pharyngeal swab
CHN_86	China	EPI_ISL_452359	female	5	live	Pharyngeal swab
CHN_87	China	EPI_ISL_419224	female	67	released	unknown
CHN_88	China	EPI_ISL_451398	male	22	released	Pharyngeal swab
CHN_89	China	EPI_ISL_451365	male	23	released	Sputum
CHN_9	China	EPI_ISL_421228	male	31	live	Pharyngeal swab	Contact to patient from Wuhan
CHN_90	China	EPI_ISL_414663	male	72	live	Sputum
CHN_91	China	EPI_ISL_482580	female	43	live	Pharyngeal swab	Mother of HZCDC6948
CHN_92	China	EPI_ISL_421233	male	35	live	Pharyngeal swab	Contact to patient from Wuhan
CHN_93	China	EPI_ISL_451313	male	50	released	Pharyngeal swab
CHN_94	China	EPI_ISL_451381	female	59	released	Pharyngeal swab
CHN_95	China	EPI_ISL_402124	female	49	live	Lung tissue	Retailer at Huanan Seafood Wholesale Market
CHN_96	China	EPI_ISL_452361	male	33	live	Pharyngeal swab
CHN_97	China	EPI_ISL_451332	male	59	released	Pharyngeal swab
CHN_98	China	EPI_ISL_452340	female	23	live	Pharyngeal swab	Traveled from Minneapolis. USA
CHN_99	China	EPI_ISL_430731	male	60	released	Pharyngeal swab
IND_1	India	EPI_ISL_700197	male	55	live	Pharyngeal swab
IND_10	India	EPI_ISL_605805	male	57	live	Pharyngeal swab	Patient acquired infection in congregation
IND_100	India	EPI_ISL_461492	male	60	live	unknown
IND_1000	India	EPI_ISL_497880	male	59	live	unknown
IND_1001	India	EPI_ISL_483861	male	48	released	unknown
IND_1002	India	EPI_ISL_516978	male	30	live	unknown
IND_1003	India	EPI_ISL_476896	male	70	deceased	unknown
IND_1004	India	EPI_ISL_586534	male	35	released	unknown
IND_1005	India	EPI_ISL_475038	male	55	released	unknown
IND_1006	India	EPI_ISL_516985	female	17	live	unknown
IND_1007	India	EPI_ISL_458105	female	70	released	unknown
IND_1008	India	EPI_ISL_444459	male	48	released	Pharyngeal swab
IND_1009	India	EPI_ISL_447044	female	42	released	unknown
IND_101	India	EPI_ISL_699915	female	36	live	Pharyngeal swab
IND_1010	India	EPI_ISL_700041	female	1	live	Pharyngeal swab
IND_1011	India	EPI_ISL_699832	male	57	live	Pharyngeal swab
IND_1012	India	EPI_ISL_486386	female	24	live	unknown
IND_1013	India	EPI_ISL_475057	male	58	released	unknown
IND_1014	India	EPI_ISL_699737	male	68	deceased	Pharyngeal swab
IND_1015	India	EPI_ISL_452204	male	20	mild	unknown
IND_1016	India	EPI_ISL_515965	female	21	released	Pharyngeal swab
IND_1017	India	EPI_ISL_641356	female	27	live	Pharyngeal swab
IND_1018	India	EPI_ISL_700266	male	35	live	Pharyngeal swab
IND_1019	India	EPI_ISL_458094	male	58	live	unknown
IND_102	India	EPI_ISL_699987	male	29	live	Pharyngeal swab
IND_1020	India	EPI_ISL_479549	female	67	live	unknown
IND_1021	India	EPI_ISL_699931	female	27	live	Pharyngeal swab
IND_1022	India	EPI_ISL_451152	female	42	released	unknown
IND_1023	India	EPI_ISL_641339	male	30	live	Pharyngeal swab
IND_1024	India	EPI_ISL_700209	male	15	live	Pharyngeal swab
IND_1025	India	EPI_ISL_483834	male	42	released	unknown
IND_1026	India	EPI_ISL_479526	male	66	live	unknown
IND_1027	India	EPI_ISL_496571	male	47	live	unknown
IND_1028	India	EPI_ISL_459911	female	48	live	Pharyngeal swab
IND_1029	India	EPI_ISL_454556	female	25	mild	unknown
IND_103	India	EPI_ISL_699682	female	40	live	Pharyngeal swab
IND_1030	India	EPI_ISL_491113	male	38	live	unknown
IND_1031	India	EPI_ISL_699716	female	30	live	Pharyngeal swab
IND_1032	India	EPI_ISL_469029	female	60	live	unknown
IND_1033	India	EPI_ISL_699813	female	33	live	Pharyngeal swab
IND_1034	India	EPI_ISL_461506	male	65	live	unknown
IND_1035	India	EPI_ISL_469046	female	54	released	unknown
IND_1036	India	EPI_ISL_454539	male	64	mild	unknown
IND_1037	India	EPI_ISL_516959	male	23	live	unknown
IND_1038	India	EPI_ISL_495021	male	60	live	unknown
IND_1039	India	EPI_ISL_586515	female	42	released	unknown
IND_104	India	EPI_ISL_479502	female	53	live	Pharyngeal swab
IND_1040	India	EPI_ISL_699779	male	56	deceased	Pharyngeal swab
IND_1041	India	EPI_ISL_435056	male	65	released	Pharyngeal swab
IND_1042	India	EPI_ISL_452193	male	1	mild	unknown
IND_1043	India	EPI_ISL_699687	male	64	live	Pharyngeal swab
IND_1044	India	EPI_ISL_479507	female	58	live	unknown
IND_1045	India	EPI_ISL_467052	male	49	live	unknown
IND_1046	India	EPI_ISL_515944	male	15	released	Pharyngeal swab
IND_1047	India	EPI_ISL_524723	male	48	deceased	unknown
IND_1048	India	EPI_ISL_461497	female	58	released	unknown
IND_1049	India	EPI_ISL_699910	male	55	live	Pharyngeal swab
IND_105	India	EPI_ISL_496555	female	36	live	unknown
IND_1050	India	EPI_ISL_700247	female	56	live	Pharyngeal swab
IND_1051	India	EPI_ISL_497763	male	40	live	unknown
IND_1052	India	EPI_ISL_700224	female	34	live	Pharyngeal swab
IND_1053	India	EPI_ISL_699676	male	1	live	Pharyngeal swab
IND_1054	India	EPI_ISL_437453	female	52	deceased	Pharyngeal swab
IND_1055	India	EPI_ISL_699973	male	52	live	Pharyngeal swab
IND_1056	India	EPI_ISL_605800	male	70	live	Pharyngeal swab
IND_1057	India	EPI_ISL_700100	female	36	live	Pharyngeal swab
IND_1058	India	EPI_ISL_524740	female	36	live	Pharyngeal swab
IND_1059	India	EPI_ISL_496533	female	36	live	unknown
IND_106	India	EPI_ISL_524749	male	65	deceased	unknown
IND_1060	India	EPI_ISL_467031	male	70	live	unknown
IND_1061	India	EPI_ISL_515948	male	10	released	Pharyngeal swab
IND_1062	India	EPI_ISL_700192	male	36	live	Pharyngeal swab
IND_1063	India	EPI_ISL_450323	female	44	live	Pharyngeal swab
IND_1064	India	EPI_ISL_455022	male	49	released	unknown
IND_1065	India	EPI_ISL_486853	female	24	live	Pharyngeal swab
IND_1066	India	EPI_ISL_483876	male	49	released	unknown
IND_1067	India	EPI_ISL_700091	female	44	live	Pharyngeal swab
IND_1068	India	EPI_ISL_495042	male	62	released	unknown
IND_1069	India	EPI_ISL_469025	male	31	released	unknown
IND_107	India	EPI_ISL_605809	male	65	live	Pharyngeal swab	Patient acquired infection in congregation
IND_1070	India	EPI_ISL_699870	male	45	live	Pharyngeal swab
IND_1071	India	EPI_ISL_444474	female	52	released	Pharyngeal swab
IND_1072	India	EPI_ISL_699788	female	40	live	Pharyngeal swab
IND_1073	India	EPI_ISL_586519	female	26	released	unknown
IND_1074	India	EPI_ISL_454535	female	70	mild	unknown
IND_1075	India	EPI_ISL_516955	male	23	live	unknown
IND_1076	India	EPI_ISL_476846	female	14	live	Pharyngeal swab
IND_1077	India	EPI_ISL_699775	female	18	live	Pharyngeal swab
IND_1078	India	EPI_ISL_516077	male	23	released	Pharyngeal swab
IND_1079	India	EPI_ISL_700003	male	17	live	Pharyngeal swab
IND_108	India	EPI_ISL_700109	female	56	live	Pharyngeal swab
IND_1080	India	EPI_ISL_512067	female	87	deceased	unknown
IND_1081	India	EPI_ISL_515969	female	34	released	Pharyngeal swab	ESIC Medical College and Hospital
IND_1082	India	EPI_ISL_454859	male	68	live	Pharyngeal swab	ESIC Medical College and Hospital
IND_1083	India	EPI_ISL_458098	female	65	live	unknown
IND_1084	India	EPI_ISL_483857	male	39	released	unknown
IND_1085	India	EPI_ISL_700297	female	26	live	Pharyngeal swab
IND_1086	India	EPI_ISL_699952	male	18	live	Pharyngeal swab
IND_1087	India	EPI_ISL_483838	female	51	released	unknown
IND_1088	India	EPI_ISL_700205	male	13	live	Pharyngeal swab
IND_1089	India	EPI_ISL_641335	female	68	live	Pharyngeal swab
IND_109	India	EPI_ISL_700132	female	25	live	Pharyngeal swab
IND_1090	India	EPI_ISL_524761	male	45	deceased	unknown
IND_1091	India	EPI_ISL_475034	female	55	released	unknown
IND_1092	India	EPI_ISL_700306	male	23	live	Pharyngeal swab
IND_1093	India	EPI_ISL_586538	male	59	released	unknown
IND_1094	India	EPI_ISL_516974	male	33	live	unknown
IND_1095	India	EPI_ISL_476867	female	60	live	unknown
IND_1096	India	EPI_ISL_699754	female	0.25	live	Pharyngeal swab
IND_1097	India	EPI_ISL_699851	male	69	live	Pharyngeal swab
IND_1098	India	EPI_ISL_450790	male	14	released	unknown
IND_1099	India	EPI_ISL_528816	male	23	live	unknown
IND_11	India	EPI_ISL_495028	female	55	released	unknown
IND_110	India	EPI_ISL_699941	male	59	live	Pharyngeal swab
IND_1100	India	EPI_ISL_447048	female	70	released	unknown
IND_1101	India	EPI_ISL_586557	female	50	released	unknown
IND_1102	India	EPI_ISL_495063	male	55	deceased	unknown
IND_1103	India	EPI_ISL_452208	female	65	mild	unknown
IND_1104	India	EPI_ISL_699805	male	18	live	Pharyngeal swab
IND_1105	India	EPI_ISL_413523	male	23	released	Pharyngeal swab
IND_1106	India	EPI_ISL_495058	male	50	live	unknown
IND_1107	India	EPI_ISL_454540	male	35	mild	unknown
IND_1108	India	EPI_ISL_699700	female	34	live	Pharyngeal swab
IND_1109	India	EPI_ISL_700076	male	34	live	Pharyngeal swab
IND_111	India	EPI_ISL_641326	male	39	deceased	Pharyngeal swab
IND_1110	India	EPI_ISL_699792	female	38	live	Pharyngeal swab
IND_1111	India	EPI_ISL_699897	male	37	live	Pharyngeal swab
IND_1112	India	EPI_ISL_467044	female	62	deceased	unknown
IND_1113	India	EPI_ISL_486407	male	16	live	unknown
IND_1114	India	EPI_ISL_699994	male	26	live	Pharyngeal swab
IND_1115	India	EPI_ISL_437449	female	17	released	Pharyngeal swab
IND_1116	India	EPI_ISL_699691	female	43	live	Pharyngeal swab
IND_1117	India	EPI_ISL_641361	male	32	live	Pharyngeal swab
IND_1118	India	EPI_ISL_700251	female	46	live	Pharyngeal swab
IND_1119	India	EPI_ISL_461481	male	18	released	unknown
IND_112	India	EPI_ISL_700216	male	48	live	Pharyngeal swab
IND_1120	India	EPI_ISL_699906	male	32	live	Pharyngeal swab
IND_1121	India	EPI_ISL_700188	male	25	live	Pharyngeal swab
IND_1122	India	EPI_ISL_496529	female	21	live	unknown
IND_1123	India	EPI_ISL_524735	male	49	released	unknown
IND_1124	India	EPI_ISL_454862	male	22	live	Pharyngeal swab	ESIC Medical College and Hospital
IND_1125	India	EPI_ISL_515952	male	19	released	Pharyngeal swab
IND_1126	India	EPI_ISL_459949	female	22	live	Pharyngeal swab, serum
IND_1127	India	EPI_ISL_700038	male	43	live	Pharyngeal swab
IND_1128	India	EPI_ISL_586522	male	34	released	unknown
IND_1129	India	EPI_ISL_476880	male	65	released	unknown
IND_113	India	EPI_ISL_479539	male	58	live	unknown
IND_1130	India	EPI_ISL_495016	male	45	released	unknown
IND_1131	India	EPI_ISL_458113	male	32	released	unknown
IND_1132	India	EPI_ISL_475041	male	67	live	unknown
IND_1133	India	EPI_ISL_454561	female	24	live	unknown
IND_1134	India	EPI_ISL_495079	female	79	released	unknown
IND_1135	India	EPI_ISL_452212	male	26	mild	unknown
IND_1136	India	EPI_ISL_699721	male	50	live	Pharyngeal swab
IND_1137	India	EPI_ISL_447551	female	52	released	Pharyngeal swab
IND_1138	India	EPI_ISL_700057	female	29	live	Pharyngeal swab
IND_1139	India	EPI_ISL_455019	male	18	released	unknown
IND_114	India	EPI_ISL_483844	male	50	released	unknown
IND_1140	India	EPI_ISL_699927	female	48	live	Pharyngeal swab
IND_1141	India	EPI_ISL_700270	female	50	live	Pharyngeal swab
IND_1142	India	EPI_ISL_641340	male	53	live	Pharyngeal swab
IND_1143	India	EPI_ISL_524714	male	75	released	unknown
IND_1144	India	EPI_ISL_515973	male	40	released	Pharyngeal swab	ESIC Medical College and Hospital
IND_1145	India	EPI_ISL_700154	male	46	live	Pharyngeal swab	ESIC Medical College and Hospital
IND_1146	India	EPI_ISL_483822	male	44	released	unknown
IND_1147	India	EPI_ISL_479530	male	80	live	unknown
IND_1148	India	EPI_ISL_699948	male	50	live	Pharyngeal swab
IND_1149	India	EPI_ISL_455015	male	55	released	unknown
IND_115	India	EPI_ISL_641349	female	23	live	Pharyngeal swab
IND_1150	India	EPI_ISL_497758	male	36	live	unknown
IND_1151	India	EPI_ISL_483841	male	15	released	unknown
IND_1152	India	EPI_ISL_479553	male	72	live	unknown
IND_1153	India	EPI_ISL_700281	female	50	live	Pharyngeal swab
IND_1154	India	EPI_ISL_524718	male	45	released	unknown
IND_1155	India	EPI_ISL_512071	female	68	released	unknown
IND_1156	India	EPI_ISL_700158	female	24	live	Pharyngeal swab
IND_1157	India	EPI_ISL_591540	female	64	released	unknown
IND_1158	India	EPI_ISL_641323	male	30	live	Pharyngeal swab
IND_1159	India	EPI_ISL_700213	male	23	live	Pharyngeal swab
IND_116	India	EPI_ISL_700279	male	19	live	Pharyngeal swab
IND_1160	India	EPI_ISL_699944	male	34	live	Pharyngeal swab
IND_1161	India	EPI_ISL_459945	female	26	live	Pharyngeal swab, serum
IND_1162	India	EPI_ISL_447031	female	65	released	unknown
IND_1163	India	EPI_ISL_700034	male	36	live	Pharyngeal swab
IND_1164	India	EPI_ISL_450786	male	63	live	unknown
IND_1165	India	EPI_ISL_699847	male	19	live	Pharyngeal swab
IND_1166	India	EPI_ISL_516962	male	29	live	unknown
IND_1167	India	EPI_ISL_700310	female	17	live	Pharyngeal swab
IND_1168	India	EPI_ISL_476871	male	24	live	unknown
IND_1169	India	EPI_ISL_699742	male	23	live	Pharyngeal swab
IND_117	India	EPI_ISL_700284	female	17	live	Pharyngeal swab
IND_1170	India	EPI_ISL_495075	male	76	released	unknown
IND_1171	India	EPI_ISL_586541	male	73	deceased	unknown
IND_1172	India	EPI_ISL_699828	male	36	live	Pharyngeal swab
IND_1173	India	EPI_ISL_514601	male	38	released	unknown
IND_1174	India	EPI_ISL_467048	female	60	deceased	unknown
IND_1175	India	EPI_ISL_524756	male	37	released	unknown
IND_1176	India	EPI_ISL_605816	female	37	live	Pharyngeal swab
IND_1177	India	EPI_ISL_700116	male	30	live	Pharyngeal swab
IND_1178	India	EPI_ISL_699998	female	24	live	Pharyngeal swab
IND_1179	India	EPI_ISL_437445	female	29	released	Pharyngeal swab
IND_118	India	EPI_ISL_512074	male	60	deceased	unknown
IND_1180	India	EPI_ISL_700232	male	52	live	Pharyngeal swab
IND_1181	India	EPI_ISL_699660	female	32	live	Pharyngeal swab
IND_1182	India	EPI_ISL_483860	male	38	released	unknown
IND_1183	India	EPI_ISL_479572	male	62	live	unknown
IND_1184	India	EPI_ISL_497881	male	50	live	unknown
IND_1185	India	EPI_ISL_700184	male	57	live	unknown
IND_1186	India	EPI_ISL_700179	male	41	live	Pharyngeal swab
IND_1187	India	EPI_ISL_524739	male	25	released	unknown
IND_1188	India	EPI_ISL_469033	male	70	live	unknown
IND_1189	India	EPI_ISL_699809	male	44	live	Pharyngeal swab
IND_119	India	EPI_ISL_586544	male	22	released	unknown
IND_1190	India	EPI_ISL_495054	male	67	released	unknown
IND_1191	India	EPI_ISL_586560	male	40	released	unknown
IND_1192	India	EPI_ISL_528821	male	20	live	Pharyngeal swab
IND_1193	India	EPI_ISL_700015	female	31	live	Pharyngeal swab
IND_1194	India	EPI_ISL_454523	female	59	mild	unknown
IND_1195	India	EPI_ISL_516943	male	47	live	unknown
IND_1196	India	EPI_ISL_476850	male	22	live	unknown
IND_1197	India	EPI_ISL_699763	male	38	live	Pharyngeal swab
IND_1198	India	EPI_ISL_514596	female	65	deceased	Pharyngeal swab
IND_1199	India	EPI_ISL_444462	female	28	released	Pharyngeal swab
IND_12	India	EPI_ISL_516950	male	26	live	unknown
IND_120	India	EPI_ISL_475048	female	50	deceased	unknown
IND_1200	India	EPI_ISL_699866	female	67	live	Pharyngeal swab
IND_1201	India	EPI_ISL_524720	male	70	released	unknown
IND_1202	India	EPI_ISL_515947	male	32	released	Pharyngeal swab
IND_1203	India	EPI_ISL_700160	male	36	live	Pharyngeal swab
IND_1204	India	EPI_ISL_461494	female	45	deceased	unknown
IND_1205	India	EPI_ISL_483879	male	41	live	unknown
IND_1206	India	EPI_ISL_497760	male	25	live	unknown
IND_1207	India	EPI_ISL_641374	male	45	live	Pharyngeal swab
IND_1208	India	EPI_ISL_699684	male	25	live	Pharyngeal swab
IND_1209	India	EPI_ISL_699981	female	50	live	Pharyngeal swab
IND_121	India	EPI_ISL_486399	male	12	live	unknown
IND_1210	India	EPI_ISL_490104	male	38	live	Pharyngeal swab
IND_1211	India	EPI_ISL_467051	male	49	live	unknown
IND_1212	India	EPI_ISL_469045	female	58	released	unknown
IND_1213	India	EPI_ISL_461505	male	65	live	unknown
IND_1214	India	EPI_ISL_444486	male	55	released	Pharyngeal swab
IND_1215	India	EPI_ISL_699882	male	48	live	Pharyngeal swab
IND_1216	India	EPI_ISL_476849	female	23	live	unknown
IND_1217	India	EPI_ISL_586516	female	42	released	unknown
IND_1218	India	EPI_ISL_699787	male	58	live	Pharyngeal swab
IND_1219	India	EPI_ISL_495022	male	60	live	unknown
IND_122	India	EPI_ISL_495070	male	24	released	unknown
IND_1220	India	EPI_ISL_435055	male	33	released	Pharyngeal swab
IND_1221	India	EPI_ISL_516078	female	21	released	Pharyngeal swab
IND_1222	India	EPI_ISL_459912	female	24	live	Pharyngeal swab, serum
IND_1223	India	EPI_ISL_699715	male	41	live	Pharyngeal swab
IND_1224	India	EPI_ISL_479495	female	58	live	unknown
IND_1225	India	EPI_ISL_454555	male	30	mild	unknown
IND_1226	India	EPI_ISL_699810	female	43	live	Pharyngeal swab
IND_1227	India	EPI_ISL_479525	female	68	live	unknown
IND_1228	India	EPI_ISL_699658	female	57	live	Pharyngeal swab
IND_1229	India	EPI_ISL_483837	male	55	released	unknown
IND_123	India	EPI_ISL_699728	male	10	live	Pharyngeal swab
IND_1230	India	EPI_ISL_512068	female	87	deceased	unknown
IND_1231	India	EPI_ISL_515966	male	23	released	Pharyngeal swab
IND_1232	India	EPI_ISL_700298	male	42	live	Pharyngeal swab
IND_1233	India	EPI_ISL_458097	female	65	live	unknown
IND_1234	India	EPI_ISL_483858	male	44	released	unknown
IND_1235	India	EPI_ISL_641355	female	43	live	Pharyngeal swab
IND_1236	India	EPI_ISL_700265	female	57	live	Pharyngeal swab
IND_1237	India	EPI_ISL_451151	male	50	released	unknown
IND_1238	India	EPI_ISL_699932	male	38	live	Pharyngeal swab
IND_1239	India	EPI_ISL_528819	male	31	live	Pharyngeal swab
IND_124	India	EPI_ISL_514604	female	37	released	unknown
IND_1240	India	EPI_ISL_447544	male	14	released	unknown
IND_1241	India	EPI_ISL_459933	female	24	live	urine
IND_1242	India	EPI_ISL_699831	female	50	live	Pharyngeal swab
IND_1243	India	EPI_ISL_452207	female	10	mild	Pharyngeal swab
IND_1244	India	EPI_ISL_586558	male	45	released	unknown
IND_1245	India	EPI_ISL_486385	female	45	live	unknown
IND_1246	India	EPI_ISL_516986	female	2	live	unknown
IND_1247	India	EPI_ISL_458106	female	45	released	unknown
IND_1248	India	EPI_ISL_476868	female	60	live	unknown
IND_1249	India	EPI_ISL_476895	male	24	live	unknown
IND_125	India	EPI_ISL_447537	male	68	released	unknown
IND_1250	India	EPI_ISL_586537	male	59	released	unknown
IND_1251	India	EPI_ISL_700309	female	47	live	Pharyngeal swab
IND_1252	India	EPI_ISL_528815	male	34	live	Pharyngeal swab
IND_1253	India	EPI_ISL_447548	female	44	released	unknown
IND_1254	India	EPI_ISL_699738	female	48	live	Pharyngeal swab
IND_1255	India	EPI_ISL_486389	female	15	live	unknown
IND_1256	India	EPI_ISL_495060	female	32	released	unknown
IND_1257	India	EPI_ISL_586554	male	55	released	unknown
IND_1258	India	EPI_ISL_476864	male	48	released	unknown
IND_1259	India	EPI_ISL_516977	male	24	live	unknown
IND_126	India	EPI_ISL_459940	male	67	live	Pharyngeal swab, serum
IND_1260	India	EPI_ISL_475037	male	55	released	unknown
IND_1261	India	EPI_ISL_700305	male	40	live	Pharyngeal swab
IND_1262	India	EPI_ISL_444456	female	43	released	Pharyngeal swab
IND_1263	India	EPI_ISL_699852	male	36	live	Pharyngeal swab
IND_1264	India	EPI_ISL_700021	female	54	live	Pharyngeal swab
IND_1265	India	EPI_ISL_459950	female	23	live	Pharyngeal swab, serum
IND_1266	India	EPI_ISL_699951	male	56	live	Pharyngeal swab
IND_1267	India	EPI_ISL_479529	female	85	live	unknown
IND_1268	India	EPI_ISL_700206	male	20	live	Pharyngeal swab
IND_1269	India	EPI_ISL_641336	male	20	live	Pharyngeal swab
IND_127	India	EPI_ISL_700031	male	52	live	Pharyngeal swab
IND_1270	India	EPI_ISL_524762	male	62	deceased	unknown
IND_1271	India	EPI_ISL_528382	male	49	live	Pharyngeal swab
IND_1272	India	EPI_ISL_512064	male	40	released	unknown
IND_1273	India	EPI_ISL_700294	male	27	live	Pharyngeal swab
IND_1274	India	EPI_ISL_479546	male	77	live	Pharyngeal swab
IND_1275	India	EPI_ISL_700269	male	41	live	Pharyngeal swab
IND_1276	India	EPI_ISL_641359	male	57	live	Pharyngeal swab
IND_1277	India	EPI_ISL_483854	male	56	released	unknown
IND_1278	India	EPI_ISL_444477	male	60	deceased	Pharyngeal swab
IND_1279	India	EPI_ISL_699873	male	23	live	Pharyngeal swab
IND_1280	India	EPI_ISL_514583	male	29	released	unknown
IND_1281	India	EPI_ISL_699776	male	8	live	Pharyngeal swab
IND_1282	India	EPI_ISL_454536	female	39	mild	unknown
IND_1283	India	EPI_ISL_516956	male	29	live	unknown
IND_1284	India	EPI_ISL_700324	female	23	live	Pharyngeal swab
IND_1285	India	EPI_ISL_700000	male	37	live	Pharyngeal swab
IND_1286	India	EPI_ISL_700092	female	40	live	Pharyngeal swab
IND_1287	India	EPI_ISL_699719	female	29	live	Pharyngeal swab
IND_1288	India	EPI_ISL_454559	male	51	mild	unknown
IND_1289	India	EPI_ISL_479499	male	51	live	unknown
IND_129	India	EPI_ISL_447034	male	78	released	unknown
IND_1290	India	EPI_ISL_469026	male	31	released	unknown
IND_1291	India	EPI_ISL_467032	male	70	live	unknown
IND_1292	India	EPI_ISL_700191	female	56	live	Pharyngeal swab
IND_1293	India	EPI_ISL_461498	female	58	released	unknown
IND_1294	India	EPI_ISL_455021	male	50	released	unknown
IND_1295	India	EPI_ISL_700248	female	60	live	Pharyngeal swab
IND_1296	India	EPI_ISL_483875	male	49	released	unknown
IND_1297	India	EPI_ISL_699675	female	5	live	Pharyngeal swab	ESIC Medical College and Hospital
IND_1298	India	EPI_ISL_700227	male	41	live	Pharyngeal swab
IND_1299	India	EPI_ISL_699688	female	24	live	Pharyngeal swab
IND_13	India	EPI_ISL_454530	male	46	mild	unknown
IND_130	India	EPI_ISL_476889	female	35	live	unknown
IND_1300	India	EPI_ISL_699970	female	66	deceased	Pharyngeal swab
IND_1301	India	EPI_ISL_437450	female	36	released	Pharyngeal swab
IND_1302	India	EPI_ISL_700103	male	66	live	Pharyngeal swab
IND_1303	India	EPI_ISL_605803	male	16	live	Pharyngeal swab
IND_1304	India	EPI_ISL_524743	female	35	released	unknown
IND_1305	India	EPI_ISL_700138	male	59	live	Pharyngeal swab
IND_1306	India	EPI_ISL_479533	male	79	live	unknown
IND_1307	India	EPI_ISL_483821	male	70	released	unknown
IND_1308	India	EPI_ISL_699924	female	34	live	Pharyngeal swab
IND_1309	India	EPI_ISL_700273	male	47	live	Pharyngeal swab
IND_131	India	EPI_ISL_700315	male	34	live	Pharyngeal swab
IND_1310	India	EPI_ISL_641343	female	32	live	Pharyngeal swab
IND_1311	India	EPI_ISL_515970	female	32	released	Pharyngeal swab
IND_1312	India	EPI_ISL_524717	male	55	released	unknown
IND_1313	India	EPI_ISL_700157	female	52	live	Pharyngeal swab
IND_1314	India	EPI_ISL_699722	female	32	live	Pharyngeal swab
IND_1315	India	EPI_ISL_452211	male	52	mild	unknown
IND_1316	India	EPI_ISL_454562	male	76	live	unknown
IND_1317	India	EPI_ISL_486393	female	65	live	unknown
IND_1318	India	EPI_ISL_475042	male	70	released	unknown
IND_1319	India	EPI_ISL_699827	male	24	live	Pharyngeal swab
IND_132	India	EPI_ISL_475027	female	57	released	unknown
IND_1320	India	EPI_ISL_700054	female	34	live	Pharyngeal swab
IND_1321	India	EPI_ISL_459925	male	68	live	Pharyngeal swab, serum
IND_1322	India	EPI_ISL_447552	male	39	released	unknown
IND_1323	India	EPI_ISL_450789	female	55	released	unknown
IND_1324	India	EPI_ISL_489995	male	35	live	unknown
IND_1325	India	EPI_ISL_495015	male	47	released	unknown
IND_1326	India	EPI_ISL_586521	male	35	released	unknown
IND_1327	India	EPI_ISL_476883	male	35	released	unknown
IND_1328	India	EPI_ISL_641362	male	48	live	Pharyngeal swab
IND_1329	India	EPI_ISL_700252	male	28	live	Pharyngeal swab
IND_133	India	EPI_ISL_516967	female	86	live	unknown
IND_1330	India	EPI_ISL_461482	male	18	released	unknown
IND_1331	India	EPI_ISL_700176	male	21	live	Pharyngeal swab
IND_1332	India	EPI_ISL_479659	female	56	live	unknown
IND_1333	India	EPI_ISL_454861	male	53	live	Pharyngeal swab
IND_1334	India	EPI_ISL_515951	male	40	released	Pharyngeal swab
IND_1335	India	EPI_ISL_524736	male	49	released	unknown
IND_1336	India	EPI_ISL_467047	female	60	deceased	unknown
IND_1337	India	EPI_ISL_524759	male	50	released	unknown
IND_1338	India	EPI_ISL_496545	male	52	live	unknown
IND_1339	India	EPI_ISL_486404	male	22	live	unknown
IND_134	India	EPI_ISL_699747	female	63	live	Pharyngeal swab
IND_1340	India	EPI_ISL_699997	male	45	live	Pharyngeal swab
IND_1341	India	EPI_ISL_479512	female	58	live	unknown
IND_1342	India	EPI_ISL_699692	male	45	live	Pharyngeal swab
IND_1343	India	EPI_ISL_495034	male	37	released	unknown
IND_1344	India	EPI_ISL_699791	female	74	live	Pharyngeal swab
IND_1345	India	EPI_ISL_699869	male	27	live	Pharyngeal swab
IND_1346	India	EPI_ISL_699894	male	59	deceased	Pharyngeal swab
IND_1347	India	EPI_ISL_514599	male	65	live	unknown
IND_1348	India	EPI_ISL_699806	male	52	live	Pharyngeal swab
IND_1349	India	EPI_ISL_699703	male	25	live	Pharyngeal swab
IND_135	India	EPI_ISL_476874	male	75	live	unknown
IND_1350	India	EPI_ISL_454543	female	40	mild	unknown
IND_1351	India	EPI_ISL_700088	male	38	live	Pharyngeal swab
IND_1352	India	EPI_ISL_700016	male	25	live	Pharyngeal swab
IND_1353	India	EPI_ISL_699760	female	56	live	Pharyngeal swab
IND_1354	India	EPI_ISL_476853	male	32	live	unknown
IND_1355	India	EPI_ISL_516940	male	48	live	unknown
IND_1356	India	EPI_ISL_495038	male	71	deceased	unknown
IND_1357	India	EPI_ISL_699865	male	30	live	Pharyngeal swab
IND_1358	India	EPI_ISL_514595	male	64	released	unknown
IND_1359	India	EPI_ISL_699898	male	25	live	Pharyngeal swab
IND_136	India	EPI_ISL_699842	male	43	live	Pharyngeal swab
IND_1360	India	EPI_ISL_469030	female	60	live	unknown
IND_1361	India	EPI_ISL_586563	male	55	released	unknown
IND_1362	India	EPI_ISL_495057	male	45	deceased	unknown
IND_1363	India	EPI_ISL_700079	male	26	live	Pharyngeal swab
IND_1364	India	EPI_ISL_528822	male	39	live	Pharyngeal swab
IND_1365	India	EPI_ISL_700084	male	43	live	Pharyngeal swab
IND_1366	India	EPI_ISL_483863	male	28	released	unknown
IND_1367	India	EPI_ISL_497882	female	26	live	unknown
IND_1368	India	EPI_ISL_699909	male	28	live	Pharyngeal swab
IND_1369	India	EPI_ISL_700187	male	28	live	Pharyngeal swab
IND_137	India	EPI_ISL_497879	male	75	live	unknown
IND_1370	India	EPI_ISL_524755	male	49	released	unknown
IND_1371	India	EPI_ISL_515932	female	28	released	Pharyngeal swab
IND_1372	India	EPI_ISL_496549	female	50	live	unknown
IND_1373	India	EPI_ISL_486408	female	16	live	unknown
IND_1374	India	EPI_ISL_700115	female	67	live	Pharyngeal swab
IND_1375	India	EPI_ISL_605815	female	25	live	Pharyngeal swab	Patient acquired infection from community
IND_1376	India	EPI_ISL_437446	female	29	released	Pharyngeal swab
IND_1377	India	EPI_ISL_699966	female	61	live	Pharyngeal swab
IND_1378	India	EPI_ISL_699663	male	61	live	Pharyngeal swab
IND_1379	India	EPI_ISL_700231	male	61	live	Pharyngeal swab
IND_138	India	EPI_ISL_461488	female	50	live	unknown
IND_1380	India	EPI_ISL_586542	male	55	released	Pharyngeal swab
IND_1381	India	EPI_ISL_495076	male	76	released	Pharyngeal swab
IND_1382	India	EPI_ISL_700058	male	68	live	Pharyngeal swab
IND_1383	India	EPI_ISL_514602	male	38	released	unknown
IND_1384	India	EPI_ISL_700037	male	29	live	Pharyngeal swab
IND_1385	India	EPI_ISL_450785	male	63	live	unknown
IND_1386	India	EPI_ISL_459946	female	58	live	Pharyngeal swab, serum
IND_1387	India	EPI_ISL_699844	male	9	live	Pharyngeal swab
IND_1388	India	EPI_ISL_699741	male	56	live	Pharyngeal swab
IND_1389	India	EPI_ISL_476872	male	61	released	unknown
IND_139	India	EPI_ISL_497884	female	2	live	unknown
IND_1390	India	EPI_ISL_700313	female	43	live	Pharyngeal swab
IND_1391	India	EPI_ISL_495019	male	28	released	unknown
IND_1392	India	EPI_ISL_516961	male	59	live	unknown
IND_1393	India	EPI_ISL_641320	male	53	live	Pharyngeal swab
IND_1394	India	EPI_ISL_700210	female	43	live	Pharyngeal swab
IND_1395	India	EPI_ISL_699947	female	16	live	Pharyngeal swab
IND_1396	India	EPI_ISL_699928	female	60	live	Pharyngeal swab
IND_1397	India	EPI_ISL_455016	male	10	released	unknown
IND_1398	India	EPI_ISL_479550	female	67	live	unknown
IND_1399	India	EPI_ISL_700282	male	48	live	Pharyngeal swab
IND_14	India	EPI_ISL_700322	male	51	live	Pharyngeal swab
IND_140	India	EPI_ISL_483865	female	53	released	unknown
IND_1400	India	EPI_ISL_483842	female	37	released	unknown
IND_1401	India	EPI_ISL_512072	female	58	deceased	unknown
IND_1402	India	EPI_ISL_699786	female	61	live	Pharyngeal swab
IND_1403	India	EPI_ISL_586517	male	30	released	unknown
IND_1404	India	EPI_ISL_495023	male	42	released	unknown
IND_1405	India	EPI_ISL_476848	male	37	live	Pharyngeal swab
IND_1406	India	EPI_ISL_491480	male	45	live	unknown
IND_1407	India	EPI_ISL_699883	male	35	live	Pharyngeal swab
IND_1408	India	EPI_ISL_469044	male	50	live	unknown
IND_1409	India	EPI_ISL_461504	male	86	live	unknown
IND_141	India	EPI_ISL_700258	female	70	live	Pharyngeal swab
IND_1410	India	EPI_ISL_699811	male	53	live	Pharyngeal swab
IND_1411	India	EPI_ISL_454554	male	30	mild	unknown
IND_1412	India	EPI_ISL_699714	male	59	live	Pharyngeal swab
IND_1413	India	EPI_ISL_483878	male	41	live	unknown
IND_1414	India	EPI_ISL_641375	male	25	live	Pharyngeal swab
IND_1415	India	EPI_ISL_700245	male	45	live	Pharyngeal swab
IND_1416	India	EPI_ISL_461495	male	54	live	unknown
IND_1417	India	EPI_ISL_699912	male	24	live	Pharyngeal swab
IND_1418	India	EPI_ISL_477183	male	42	released	unknown
IND_1419	India	EPI_ISL_700161	female	24	live	Pharyngeal swab
IND_142	India	EPI_ISL_641368	female	24	live	Pharyngeal swab
IND_1420	India	EPI_ISL_524721	female	78	released	unknown
IND_1421	India	EPI_ISL_605799	male	58	live	Pharyngeal swab
IND_1422	India	EPI_ISL_515946	male	30	released	Pharyngeal swab
IND_1423	India	EPI_ISL_467050	male	61	live	unknown
IND_1424	India	EPI_ISL_699980	female	48	live	Pharyngeal swab
IND_1425	India	EPI_ISL_699685	male	41	live	Pharyngeal swab
IND_1426	India	EPI_ISL_479505	female	61	live	unknown
IND_1427	India	EPI_ISL_699678	female	45	live	Pharyngeal swab
IND_1428	India	EPI_ISL_586559	male	45	released	unknown
IND_1429	India	EPI_ISL_486384	male	82	live	unknown
IND_143	India	EPI_ISL_496520	female	78	live	unknown
IND_1430	India	EPI_ISL_452206	male	68	mild	unknown
IND_1431	India	EPI_ISL_699735	male	40	live	Pharyngeal swab
IND_1432	India	EPI_ISL_699830	male	38	live	Pharyngeal swab
IND_1433	India	EPI_ISL_447545	female	25	released	unknown
IND_1434	India	EPI_ISL_459932	female	32	live	Pharyngeal swab, serum
IND_1435	India	EPI_ISL_700043	male	35	live	Pharyngeal swab
IND_1436	India	EPI_ISL_528818	male	60	live	Pharyngeal swab
IND_1437	India	EPI_ISL_700308	female	52	live	Pharyngeal swab
IND_1438	India	EPI_ISL_476894	male	39	live	unknown
IND_1439	India	EPI_ISL_586536	male	33	released	unknown
IND_144	India	EPI_ISL_700181	female	55	live	Pharyngeal swab
IND_1440	India	EPI_ISL_458107	female	45	released	unknown
IND_1441	India	EPI_ISL_476869	male	45	released	unknown
IND_1442	India	EPI_ISL_483836	male	48	released	unknown
IND_1443	India	EPI_ISL_699659	female	33	live	Pharyngeal swab
IND_1444	India	EPI_ISL_486881	male	26	live	unknown
IND_1445	India	EPI_ISL_451150	male	70	released	unknown
IND_1446	India	EPI_ISL_699933	male	45	live	Pharyngeal swab
IND_1447	India	EPI_ISL_483859	male	44	released	unknown
IND_1448	India	EPI_ISL_458096	male	63	live	unknown
IND_1449	India	EPI_ISL_641354	female	69	live	Pharyngeal swab
IND_145	India	EPI_ISL_605813	male	48	live	Pharyngeal swab
IND_1450	India	EPI_ISL_700299	male	30	live	Pharyngeal swab
IND_1451	India	EPI_ISL_512069	female	82	deceased	unknown
IND_1452	India	EPI_ISL_515967	male	25	released	Pharyngeal swab
IND_1453	India	EPI_ISL_700140	male	43	live	Pharyngeal swab
IND_1454	India	EPI_ISL_700123	female	35	live	Pharyngeal swab
IND_1455	India	EPI_ISL_528383	male	49	live	Pharyngeal swab
IND_1456	India	EPI_ISL_524763	male	62	deceased	unknown
IND_1457	India	EPI_ISL_641337	male	30	live	Pharyngeal swab
IND_1458	India	EPI_ISL_479528	male	38	live	unknown
IND_1459	India	EPI_ISL_699950	female	65	live	Pharyngeal swab
IND_146	India	EPI_ISL_700113	male	60	live	Pharyngeal swab
IND_1460	India	EPI_ISL_641358	male	62	live	Pharyngeal swab
IND_1461	India	EPI_ISL_700268	male	41	live	Pharyngeal swab
IND_1462	India	EPI_ISL_483855	male	38	released	unknown
IND_1463	India	EPI_ISL_479547	female	43	live	unknown
IND_1464	India	EPI_ISL_700295	male	42	live	Pharyngeal swab
IND_1465	India	EPI_ISL_512065	male	36	released	unknown
IND_1466	India	EPI_ISL_495061	male	75	deceased	unknown
IND_1467	India	EPI_ISL_486388	male	22	live	unknown
IND_1468	India	EPI_ISL_586555	female	24	released	unknown
IND_1469	India	EPI_ISL_475059	male	59	live	unknown
IND_147	India	EPI_ISL_524753	male	36	released	unknown
IND_1470	India	EPI_ISL_699739	female	33	live	Pharyngeal swab
IND_1471	India	EPI_ISL_528814	male	42	critical	unknown
IND_1472	India	EPI_ISL_459951	female	23	live	Pharyngeal swab, serum
IND_1473	India	EPI_ISL_700020	male	63	live	Pharyngeal swab
IND_1474	India	EPI_ISL_444457	male	40	released	Pharyngeal swab
IND_1475	India	EPI_ISL_699853	male	48	live	Pharyngeal swab
IND_1476	India	EPI_ISL_516976	male	25	live	unknown
IND_1477	India	EPI_ISL_700304	male	69	live	Pharyngeal swab
IND_1478	India	EPI_ISL_475036	male	45	released	unknown
IND_1479	India	EPI_ISL_476865	male	53	released	unknown
IND_148	India	EPI_ISL_515934	male	28	released	Pharyngeal swab
IND_1480	India	EPI_ISL_700249	female	8	live	Pharyngeal swab
IND_1481	India	EPI_ISL_483874	male	85	deceased	unknown
IND_1482	India	EPI_ISL_461499	male	73	live	unknown
IND_1483	India	EPI_ISL_455020	male	20	released	unknown
IND_1484	India	EPI_ISL_700190	male	25	live	Pharyngeal swab
IND_1485	India	EPI_ISL_450321	male	57	live	Pharyngeal swab
IND_1486	India	EPI_ISL_467033	male	45	live	unknown
IND_1487	India	EPI_ISL_524742	female	35	released	unknown
IND_1488	India	EPI_ISL_605802	male	45	live	Pharyngeal swab	Patient acquired infection from community
IND_1489	India	EPI_ISL_700102	male	31	live	Pharyngeal swab
IND_149	India	EPI_ISL_700237	male	72	live	Pharyngeal swab
IND_1490	India	EPI_ISL_699971	male	44	live	Pharyngeal swab
IND_1491	India	EPI_ISL_699674	female	31	live	Pharyngeal swab
IND_1492	India	EPI_ISL_479509	male	65	live	unknown
IND_1493	India	EPI_ISL_516075	male	26	released	Pharyngeal swab
IND_1494	India	EPI_ISL_516957	male	22	live	unknown
IND_1495	India	EPI_ISL_454537	male	45	mild	unknown
IND_1496	India	EPI_ISL_700325	male	20	live	Pharyngeal swab
IND_1497	India	EPI_ISL_476844	male	76	live	Pharyngeal swab
IND_1498	India	EPI_ISL_699777	female	58	live	Pharyngeal swab
IND_1499	India	EPI_ISL_514582	male	29	released	unknown
IND_15	India	EPI_ISL_699770	female	2	live	Pharyngeal swab
IND_150	India	EPI_ISL_699698	male	51	live	Pharyngeal swab
IND_1500	India	EPI_ISL_444476	female	24	released	Pharyngeal swab
IND_1501	India	EPI_ISL_699872	male	36	live	Pharyngeal swab
IND_1502	India	EPI_ISL_469048	male	37	released	unknown
IND_1503	India	EPI_ISL_469027	male	65	live	unknown
IND_1504	India	EPI_ISL_454558	female	70	mild	unknown
IND_1505	India	EPI_ISL_479498	female	50	live	unknown
IND_1506	India	EPI_ISL_699718	female	50	live	Pharyngeal swab
IND_1507	India	EPI_ISL_447553	male	13	released	unknown
IND_1508	India	EPI_ISL_700055	male	4	live	Pharyngeal swab
IND_1509	India	EPI_ISL_699826	male	46	live	Pharyngeal swab
IND_151	India	EPI_ISL_699665	male	4	live	Pharyngeal swab
IND_1510	India	EPI_ISL_486392	male	28	live	unknown
IND_1511	India	EPI_ISL_475043	male	40	quarantine	unknown
IND_1512	India	EPI_ISL_699723	female	40	live	Pharyngeal swab
IND_1513	India	EPI_ISL_452210	male	1	mild	unknown
IND_1514	India	EPI_ISL_495014	male	47	released	unknown
IND_1515	India	EPI_ISL_586520	male	35	released	unknown
IND_1516	India	EPI_ISL_476882	male	57	live	unknown
IND_1517	India	EPI_ISL_458111	male	30	released	unknown
IND_1518	India	EPI_ISL_578697	male	76	live	unknown
IND_1519	India	EPI_ISL_450788	male	38	released	unknown
IND_152	India	EPI_ISL_437440	male	7	released	Pharyngeal swab
IND_1520	India	EPI_ISL_483820	male	35	deceased	unknown
IND_1521	India	EPI_ISL_479532	male	65	live	unknown
IND_1522	India	EPI_ISL_700156	male	62	live	Pharyngeal swab
IND_1523	India	EPI_ISL_515971	male	10	released	Pharyngeal swab
IND_1524	India	EPI_ISL_524716	male	55	released	unknown
IND_1525	India	EPI_ISL_641342	male	29	live	Pharyngeal swab
IND_1526	India	EPI_ISL_699925	male	31	live	Pharyngeal swab
IND_1527	India	EPI_ISL_514598	male	65	live	unknown
IND_1528	India	EPI_ISL_699868	male	36	live	Pharyngeal swab
IND_1529	India	EPI_ISL_495035	male	62	released	unknown
IND_153	India	EPI_ISL_435049	male	45	released	Pharyngeal swab
IND_1530	India	EPI_ISL_699790	male	29	live	Pharyngeal swab
IND_1531	India	EPI_ISL_700089	female	34	live	Pharyngeal swab
IND_1532	India	EPI_ISL_700074	male	60	live	Pharyngeal swab
IND_1533	India	EPI_ISL_454542	male	17	mild	unknown
IND_1534	India	EPI_ISL_699702	male	47	live	Pharyngeal swab
IND_1535	India	EPI_ISL_699807	female	49	live	Pharyngeal swab
IND_1536	India	EPI_ISL_515950	male	25	released	Pharyngeal swab
IND_1537	India	EPI_ISL_454860	male	19	live	Pharyngeal swab
IND_1538	India	EPI_ISL_467029	male	72	released	unknown
IND_1539	India	EPI_ISL_524737	male	55	released	unknown
IND_154	India	EPI_ISL_700010	female	50	live	Pharyngeal swab
IND_1540	India	EPI_ISL_479658	female	57	live	unknown
IND_1541	India	EPI_ISL_700177	male	25	live	Pharyngeal swab
IND_1542	India	EPI_ISL_461483	male	68	live	unknown
IND_1543	India	EPI_ISL_699904	female	28	live	Pharyngeal swab
IND_1544	India	EPI_ISL_700253	female	26	live	Pharyngeal swab
IND_1545	India	EPI_ISL_641363	female	52	live	Pharyngeal swab
IND_1546	India	EPI_ISL_699693	male	16	live	Pharyngeal swab
IND_1547	India	EPI_ISL_491096	male	26	live	unknown
IND_1548	India	EPI_ISL_479513	male	55	live	unknown
IND_1549	India	EPI_ISL_699996	female	89	deceased	Pharyngeal swab
IND_155	India	EPI_ISL_514593	female	72	released	unknown
IND_1550	India	EPI_ISL_700118	male	62	deceased	Pharyngeal swab
IND_1551	India	EPI_ISL_486405	male	34	live	unknown
IND_1552	India	EPI_ISL_496544	female	40	live	unknown
IND_1553	India	EPI_ISL_467046	male	70	deceased	unknown
IND_1554	India	EPI_ISL_524758	male	50	released	unknown
IND_1555	India	EPI_ISL_497883	female	20	live	unknown
IND_1556	India	EPI_ISL_483862	male	28	released	unknown
IND_1557	India	EPI_ISL_700230	male	39	live	Pharyngeal swab
IND_1558	India	EPI_ISL_699662	male	39	live	Pharyngeal swab
IND_1559	India	EPI_ISL_437447	male	42	released	Pharyngeal swab
IND_156	India	EPI_ISL_699863	male	45	live	Pharyngeal swab
IND_1560	India	EPI_ISL_699967	female	52	live	Pharyngeal swab
IND_1561	India	EPI_ISL_605814	female	18	live	Pharyngeal swab	Patient acquired infection from community
IND_1562	India	EPI_ISL_486409	male	17	live	unknown
IND_1563	India	EPI_ISL_700114	male	42	live	Pharyngeal swab
IND_1564	India	EPI_ISL_496548	male	40	live	unknown
IND_1565	India	EPI_ISL_524754	male	49	released	unknown
IND_1566	India	EPI_ISL_515933	male	33	released	unknown
IND_1567	India	EPI_ISL_699899	male	34	live	Pharyngeal swab
IND_1568	India	EPI_ISL_514594	male	64	released	unknown
IND_1569	India	EPI_ISL_699864	female	30	live	Pharyngeal swab
IND_157	India	EPI_ISL_516946	female	38	live	unknown
IND_1570	India	EPI_ISL_444460	male	37	released	Pharyngeal swab
IND_1571	India	EPI_ISL_495039	male	71	deceased	unknown
IND_1572	India	EPI_ISL_516941	male	47	live	unknown
IND_1573	India	EPI_ISL_454521	female	1	mild	unknown
IND_1574	India	EPI_ISL_476852	male	28	live	unknown
IND_1575	India	EPI_ISL_699761	male	32	live	Pharyngeal swab
IND_1576	India	EPI_ISL_700017	female	59	live	Pharyngeal swab
IND_1577	India	EPI_ISL_700085	female	26	live	Pharyngeal swab
IND_1578	India	EPI_ISL_700078	male	49	live	Pharyngeal swab
IND_1579	India	EPI_ISL_586562	male	55	released	Pharyngeal swab
IND_158	India	EPI_ISL_454526	female	12	mild	unknown
IND_1580	India	EPI_ISL_495056	male	45	deceased	unknown
IND_1581	India	EPI_ISL_469031	male	58	deceased	unknown
IND_1582	India	EPI_ISL_699946	male	85	live	Pharyngeal swab
IND_1583	India	EPI_ISL_700211	female	33	live	Pharyngeal swab
IND_1584	India	EPI_ISL_641321	male	50	released	Pharyngeal swab
IND_1585	India	EPI_ISL_512073	female	58	deceased	unknown
IND_1586	India	EPI_ISL_483843	female	37	released	unknown
IND_1587	India	EPI_ISL_700283	female	36	live	Pharyngeal swab
IND_1588	India	EPI_ISL_479551	male	11	live	unknown
IND_1589	India	EPI_ISL_455017	male	33	released	unknown
IND_159	India	EPI_ISL_436138	male	38	live	unknown
IND_1590	India	EPI_ISL_514603	female	37	released	unknown
IND_1591	India	EPI_ISL_700059	male	39	live	Pharyngeal swab
IND_1592	India	EPI_ISL_586543	male	39	live	Pharyngeal swab
IND_1593	India	EPI_ISL_495077	male	48	released	unknown
IND_1594	India	EPI_ISL_700312	female	61	live	Pharyngeal swab
IND_1595	India	EPI_ISL_516960	male	18	live	unknown
IND_1596	India	EPI_ISL_495018	male	59	released	unknown
IND_1597	India	EPI_ISL_476873	male	61	released	unknown
IND_1598	India	EPI_ISL_699740	male	38	live	Pharyngeal swab
IND_1599	India	EPI_ISL_699845	male	62	deceased	Pharyngeal swab
IND_16	India	EPI_ISL_699888	female	42	live	Pharyngeal swab
IND_160	India	EPI_ISL_699766	female	52	live	Pharyngeal swab
IND_1600	India	EPI_ISL_459947	female	24	live	Pharyngeal swab, serum
IND_1601	India	EPI_ISL_450784	male	17	released	unknown
IND_1602	India	EPI_ISL_700036	male	30	live	Pharyngeal swab
IND_1603	India	EPI_ISL_447033	male	40	released	unknown
IND_161	India	EPI_ISL_476855	male	34	live	unknown
IND_162	India	EPI_ISL_586565	female	45	deceased	unknown
IND_163	India	EPI_ISL_454549	male	22	mild	unknown
IND_164	India	EPI_ISL_495051	male	41	released	unknown
IND_165	India	EPI_ISL_436157	female	50	live	unknown
IND_166	India	EPI_ISL_699709	male	52	live	Pharyngeal swab
IND_167	India	EPI_ISL_469036	female	66	live	unknown
IND_168	India	EPI_ISL_700082	female	31	live	Pharyngeal swab
IND_169	India	EPI_ISL_495032	male	53	released	unknown
IND_17	India	EPI_ISL_514585	male	59	released	unknown
IND_170	India	EPI_ISL_699797	male	42	live	Pharyngeal swab
IND_171	India	EPI_ISL_476859	male	66	released	unknown
IND_172	India	EPI_ISL_454545	male	59	mild	unknown
IND_173	India	EPI_ISL_586569	female	28	released	unknown
IND_174	India	EPI_ISL_699705	male	52	deceased	Pharyngeal swab
IND_175	India	EPI_ISL_700073	male	38	live	Pharyngeal swab
IND_176	India	EPI_ISL_461484	female	60	live	unknown
IND_177	India	EPI_ISL_497875	male	18	live	unknown
IND_178	India	EPI_ISL_497888	female	45	live	unknown
IND_179	India	EPI_ISL_461479	female	45	released	unknown
IND_18	India	EPI_ISL_444471	female	34	released	Pharyngeal swab
IND_180	India	EPI_ISL_641364	male	60	live	Pharyngeal swab
IND_181	India	EPI_ISL_700254	female	24	live	Pharyngeal swab
IND_182	India	EPI_ISL_483869	female	54	released	unknown
IND_183	India	EPI_ISL_454867	male	25	live	Pharyngeal swab	ESIC Medical College and Hospital
IND_184	India	EPI_ISL_515957	male	17	released	Pharyngeal swab
IND_185	India	EPI_ISL_524730	male	50	released	unknown
IND_186	India	EPI_ISL_512059	female	45	released	unknown
IND_187	India	EPI_ISL_486402	female	30	live	unknown
IND_188	India	EPI_ISL_496543	female	65	live	unknown
IND_189	India	EPI_ISL_467041	female	57	deceased	unknown
IND_19	India	EPI_ISL_700006	male	29	live	Pharyngeal swab
IND_190	India	EPI_ISL_515938	male	24	released	Pharyngeal swab
IND_191	India	EPI_ISL_699694	male	20	live	Pharyngeal swab
IND_192	India	EPI_ISL_479514	male	67	live	unknown
IND_193	India	EPI_ISL_699669	female	42	live	Pharyngeal swab
IND_194	India	EPI_ISL_699991	male	62	live	Pharyngeal swab
IND_195	India	EPI_ISL_699821	female	23	live	Pharyngeal swab
IND_196	India	EPI_ISL_486395	female	80	live	unknown
IND_197	India	EPI_ISL_475044	male	40	quarantine	unknown
IND_198	India	EPI_ISL_586548	female	55	released	unknown
IND_199	India	EPI_ISL_699724	male	28	live	Pharyngeal swab
IND_2	India	EPI_ISL_467034	male	62	live	unknown
IND_20	India	EPI_ISL_431102	female	24	live	Pharyngeal swab
IND_200	India	EPI_ISL_514608	male	25	released	unknown
IND_201	India	EPI_ISL_459923	male	36	live	Pharyngeal swab
IND_202	India	EPI_ISL_447554	male	39	released	unknown
IND_203	India	EPI_ISL_700052	male	37	live	Pharyngeal swab
IND_204	India	EPI_ISL_528809	male	54	critical	Pharyngeal swab
IND_205	India	EPI_ISL_447038	female	34	released	unknown
IND_206	India	EPI_ISL_586527	female	30	released	unknown
IND_207	India	EPI_ISL_476885	male	9	live	unknown
IND_208	India	EPI_ISL_476878	male	66	released	unknown
IND_209	India	EPI_ISL_525421	male	62	released	unknown
IND_21	India	EPI_ISL_459918	female	23	quarantine	Pharyngeal swab, serum
IND_210	India	EPI_ISL_483827	male	50	released	unknown
IND_211	India	EPI_ISL_479535	male	40	live	unknown
IND_212	India	EPI_ISL_700275	male	47	live	Pharyngeal swab
IND_213	India	EPI_ISL_641345	female	18	live	Pharyngeal swab
IND_214	India	EPI_ISL_483848	male	62	released	unknown
IND_215	India	EPI_ISL_458087	male	37	live	unknown
IND_216	India	EPI_ISL_700288	male	73	live	Pharyngeal swab
IND_217	India	EPI_ISL_699922	male	33	live	Pharyngeal swab
IND_218	India	EPI_ISL_700151	female	15	live	Pharyngeal swab
IND_219	India	EPI_ISL_431103	male	52	released	Pharyngeal swab
IND_22	India	EPI_ISL_700094	female	29	live	Pharyngeal swab
IND_220	India	EPI_ISL_699874	female	47	live	Pharyngeal swab
IND_221	India	EPI_ISL_514584	male	59	released	unknown
IND_222	India	EPI_ISL_699889	male	50	live	Pharyngeal swab
IND_223	India	EPI_ISL_476842	male	35	live	Pharyngeal swab
IND_224	India	EPI_ISL_699771	female	40	live	Pharyngeal swab
IND_225	India	EPI_ISL_454531	male	65	mild	unknown
IND_226	India	EPI_ISL_516951	male	25	live	unknown
IND_227	India	EPI_ISL_495029	female	55	released	unknown
IND_228	India	EPI_ISL_491477	male	19	live	unknown
IND_229	India	EPI_ISL_700323	male	30	live	Pharyngeal swab
IND_23	India	EPI_ISL_700069	male	38	live	Pharyngeal swab
IND_230	India	EPI_ISL_436140	female	52	live	unknown
IND_231	India	EPI_ISL_495046	female	50	deceased	unknown
IND_232	India	EPI_ISL_700068	male	39	live	unknown
IND_233	India	EPI_ISL_459919	female	29	quarantine	Pharyngeal swab
IND_234	India	EPI_ISL_699918	male	58	live	Pharyngeal swab
IND_235	India	EPI_ISL_455026	female	60	released	unknown
IND_236	India	EPI_ISL_483872	male	60	live	unknown
IND_237	India	EPI_ISL_467035	female	55	released	unknown
IND_238	India	EPI_ISL_496537	male	54	live	unknown
IND_239	India	EPI_ISL_700196	male	53	live	Pharyngeal swab
IND_24	India	EPI_ISL_495047	female	50	deceased	unknown
IND_240	India	EPI_ISL_700104	male	35	live	Pharyngeal swab
IND_241	India	EPI_ISL_605804	female	44	live	Pharyngeal swab
IND_242	India	EPI_ISL_524744	male	23	released	unknown
IND_243	India	EPI_ISL_699672	male	54	live	Pharyngeal swab
IND_244	India	EPI_ISL_495067	male	52	released	unknown
IND_245	India	EPI_ISL_586553	male	55	released	unknown
IND_246	India	EPI_ISL_528812	male	43	live	Pharyngeal swab
IND_247	India	EPI_ISL_700049	female	36	live	Pharyngeal swab
IND_248	India	EPI_ISL_459938	male	61	live	Pharyngeal swab, serum, sputum and urine
IND_249	India	EPI_ISL_476863	female	40	released	unknown
IND_25	India	EPI_ISL_436141	female	27	live	unknown
IND_250	India	EPI_ISL_699750	male	36	live	Pharyngeal swab
IND_251	India	EPI_ISL_516970	male	36	live	unknown
IND_252	India	EPI_ISL_700302	male	70	live	Pharyngeal swab
IND_253	India	EPI_ISL_475030	male	70	released	unknown
IND_254	India	EPI_ISL_699855	male	39	live	Pharyngeal swab
IND_255	India	EPI_ISL_454832	female	58	live	Pharyngeal swab
IND_256	India	EPI_ISL_528385	male	49	live	Pharyngeal swab	ESIC Medical College and Hospital, Faridabad
IND_257	India	EPI_ISL_524765	female	80	deceased	unknown
IND_258	India	EPI_ISL_700125	male	26	live	Pharyngeal swab
IND_259	India	EPI_ISL_699956	male	26	live	Pharyngeal swab
IND_26	India	EPI_ISL_700200	male	80	deceased	Pharyngeal swab
IND_260	India	EPI_ISL_641331	male	57	live	Pharyngeal swab
IND_261	India	EPI_ISL_700201	male	49	live	Pharyngeal swab
IND_262	India	EPI_ISL_479541	male	27	live	unknown
IND_263	India	EPI_ISL_700293	female	35	live	Pharyngeal swab
IND_264	India	EPI_ISL_483853	male	56	released	unknown
IND_265	India	EPI_ISL_699939	male	33	live	Pharyngeal swab
IND_266	India	EPI_ISL_512063	male	30	released	unknown
IND_267	India	EPI_ISL_700129	female	55	live	Pharyngeal swab
IND_268	India	EPI_ISL_479522	male	75	live	unknown
IND_269	India	EPI_ISL_483830	male	41	released	unknown
IND_27	India	EPI_ISL_641330	female	24	live	Pharyngeal swab
IND_270	India	EPI_ISL_458090	female	56	live	unknown
IND_271	India	EPI_ISL_700262	male	32	live	Pharyngeal swab
IND_272	India	EPI_ISL_641352	female	25	live	Pharyngeal swab
IND_273	India	EPI_ISL_699935	male	54	live	Pharyngeal swab
IND_274	India	EPI_ISL_700146	female	55	live	Pharyngeal swab
IND_275	India	EPI_ISL_515961	female	31	released	Pharyngeal swab
IND_276	India	EPI_ISL_699836	female	36	live	Pharyngeal swab
IND_277	India	EPI_ISL_452200	male	98	mild	unknown
IND_278	India	EPI_ISL_699733	female	34	live	Pharyngeal swab
IND_279	India	EPI_ISL_475053	male	39	released	unknown
IND_28	India	EPI_ISL_699957	female	48	live	Pharyngeal swab
IND_280	India	EPI_ISL_486382	male	43	live	unknown
IND_281	India	EPI_ISL_447543	male	33	released	unknown
IND_282	India	EPI_ISL_459934	female	23	live	urine
IND_283	India	EPI_ISL_516981	female	22	live	unknown
IND_284	India	EPI_ISL_458101	female	75	live	unknown
IND_285	India	EPI_ISL_476892	female	35	live	unknown
IND_286	India	EPI_ISL_586530	male	57	released	unknown
IND_287	India	EPI_ISL_699859	female	62	live	Pharyngeal swab
IND_288	India	EPI_ISL_699914	male	28	live	Pharyngeal swab
IND_289	India	EPI_ISL_461493	female	45	deceased	unknown
IND_29	India	EPI_ISL_700124	male	34	live	Pharyngeal swab
IND_290	India	EPI_ISL_641373	male	73	live	Pharyngeal swab
IND_291	India	EPI_ISL_497767	male	35	live	unknown
IND_292	India	EPI_ISL_524727	female	60	released	unknown
IND_293	India	EPI_ISL_467039	female	44	live	unknown
IND_294	India	EPI_ISL_700167	female	27	live	Pharyngeal swab
IND_295	India	EPI_ISL_700108	female	23	live	Pharyngeal swab
IND_296	India	EPI_ISL_605808	male	66	live	Pharyngeal swab
IND_297	India	EPI_ISL_524748	male	40	deceased	unknown
IND_298	India	EPI_ISL_699683	male	52	live	Pharyngeal swab
IND_299	India	EPI_ISL_699986	male	33	live	Pharyngeal swab
IND_3	India	EPI_ISL_483873	male	60	live	unknown
IND_30	India	EPI_ISL_454833	male	56	live	unknown
IND_300	India	EPI_ISL_435052	female	66	released	Pharyngeal swab
IND_301	India	EPI_ISL_500948	male	72	released	unknown
IND_302	India	EPI_ISL_583915	male	21	released	Pharyngeal swab
IND_303	India	EPI_ISL_452197	female	32	mild	unknown
IND_304	India	EPI_ISL_699878	female	42	live	Pharyngeal swab
IND_305	India	EPI_ISL_469042	male	63	released	unknown
IND_306	India	EPI_ISL_461502	male	50	deceased	unknown
IND_307	India	EPI_ISL_444481	female	55	released	Pharyngeal swab
IND_308	India	EPI_ISL_514588	male	62	released	unknown
IND_309	India	EPI_ISL_699780	male	40	live	Pharyngeal swab
IND_31	India	EPI_ISL_524764	female	80	deceased	unknown
IND_310	India	EPI_ISL_495025	male	50	released	unknown
IND_311	India	EPI_ISL_699712	female	33	live	Pharyngeal swab
IND_312	India	EPI_ISL_454552	male	63	mild	unknown
IND_313	India	EPI_ISL_699817	male	51	live	Pharyngeal swab
IND_314	India	EPI_ISL_700064	male	55	live	unknown
IND_315	India	EPI_ISL_459915	male	28	live	Pharyngeal swab, serum
IND_316	India	EPI_ISL_700099	male	55	live	Pharyngeal swab
IND_317	India	EPI_ISL_514605	male	20	released	unknown
IND_318	India	EPI_ISL_699729	male	40	live	Pharyngeal swab
IND_319	India	EPI_ISL_586545	male	22	released	unknown
IND_32	India	EPI_ISL_528384	male	49	live	Pharyngeal swab	ESIC Medical College and Hospital, Faridabad
IND_320	India	EPI_ISL_495071	male	45	released	unknown
IND_321	India	EPI_ISL_486398	female	22	live	unknown
IND_322	India	EPI_ISL_590689	male	73	released	unknown
IND_323	India	EPI_ISL_699843	male	15	live	Pharyngeal swab
IND_324	India	EPI_ISL_476875	male	75	live	unknown
IND_325	India	EPI_ISL_699746	female	23	live	Pharyngeal swab
IND_326	India	EPI_ISL_475026	female	57	released	unknown
IND_327	India	EPI_ISL_700314	male	35	live	Pharyngeal swab
IND_328	India	EPI_ISL_476888	male	20	live	unknown
IND_329	India	EPI_ISL_516966	female	55	live	unknown
IND_33	India	EPI_ISL_512062	female	20	released	unknown
IND_330	India	EPI_ISL_700030	female	30	live	Pharyngeal swab
IND_331	India	EPI_ISL_447035	female	78	deceased	unknown
IND_332	India	EPI_ISL_447536	male	68	released	unknown
IND_333	India	EPI_ISL_459941	female	69	live	Pharyngeal swab, serum
IND_334	India	EPI_ISL_479538	male	61	live	unknown
IND_335	India	EPI_ISL_700217	male	25	live	Pharyngeal swab
IND_336	India	EPI_ISL_641327	male	29	live	Pharyngeal swab
IND_337	India	EPI_ISL_699940	male	30	live	Pharyngeal swab
IND_338	India	EPI_ISL_512075	male	40	released	unknown
IND_339	India	EPI_ISL_700285	male	8	live	Pharyngeal swab
IND_34	India	EPI_ISL_699938	female	42	live	Pharyngeal swab
IND_340	India	EPI_ISL_483845	male	50	released	unknown
IND_341	India	EPI_ISL_700278	male	21	live	Pharyngeal swab
IND_342	India	EPI_ISL_641348	female	24	live	Pharyngeal swab
IND_343	India	EPI_ISL_476854	male	12	live	unknown
IND_344	India	EPI_ISL_699767	female	54	live	Pharyngeal swab
IND_345	India	EPI_ISL_436139	male	20	live	unknown
IND_346	India	EPI_ISL_454527	female	59	mild	unknown
IND_347	India	EPI_ISL_516947	male	45	live	unknown
IND_348	India	EPI_ISL_699862	male	7	live	Pharyngeal swab
IND_349	India	EPI_ISL_444466	male	35	released	Pharyngeal swab
IND_35	India	EPI_ISL_514435	male	42	quarantine	unknown
IND_350	India	EPI_ISL_514592	male	55	released	unknown
IND_351	India	EPI_ISL_700011	male	54	live	Pharyngeal swab
IND_352	India	EPI_ISL_700083	female	53	live	Pharyngeal swab
IND_353	India	EPI_ISL_469037	male	61	deceased	unknown
IND_354	India	EPI_ISL_436156	female	55	live	unknown
IND_355	India	EPI_ISL_586564	male	35	deceased	unknown
IND_356	India	EPI_ISL_495050	male	41	released	unknown
IND_357	India	EPI_ISL_454548	male	42	mild	unknown
IND_358	India	EPI_ISL_700180	male	64	live	Pharyngeal swab
IND_359	India	EPI_ISL_483864	female	53	released	unknown
IND_36	India	EPI_ISL_483852	male	44	released	unknown
IND_360	India	EPI_ISL_641369	male	62	released	Pharyngeal swab
IND_361	India	EPI_ISL_497885	female	75	live	unknown
IND_362	India	EPI_ISL_497878	female	38	live	unknown
IND_363	India	EPI_ISL_461489	female	45	live	unknown
IND_364	India	EPI_ISL_699961	male	15	live	Pharyngeal swab
IND_365	India	EPI_ISL_479519	male	67	live	unknown
IND_366	India	EPI_ISL_699664	female	11	live	Pharyngeal swab
IND_367	India	EPI_ISL_699699	male	53	live	Pharyngeal swab
IND_368	India	EPI_ISL_524752	male	36	released	unknown
IND_369	India	EPI_ISL_515935	male	22	released	Pharyngeal swab
IND_37	India	EPI_ISL_479540	male	65	live	unknown
IND_370	India	EPI_ISL_700112	male	35	live	Pharyngeal swab
IND_371	India	EPI_ISL_605812	female	28	live	Pharyngeal swab
IND_372	India	EPI_ISL_515956	male	26	released	Pharyngeal swab
IND_373	India	EPI_ISL_454866	male	25	live	Pharyngeal swab
IND_374	India	EPI_ISL_512058	female	64	deceased	unknown
IND_375	India	EPI_ISL_524731	male	50	released	unknown
IND_376	India	EPI_ISL_700255	male	30	live	Pharyngeal swab
IND_377	India	EPI_ISL_641365	female	54	live	Pharyngeal swab
IND_378	India	EPI_ISL_483868	female	54	released	unknown
IND_379	India	EPI_ISL_699902	male	41	live	Pharyngeal swab
IND_38	India	EPI_ISL_459939	male	70	live	Pharyngeal swab, serum
IND_380	India	EPI_ISL_461478	female	45	released	unknown
IND_381	India	EPI_ISL_451161	male	37	released	unknown
IND_382	India	EPI_ISL_461485	female	57	deceased	unknown
IND_383	India	EPI_ISL_699990	male	35	live	Pharyngeal swab
IND_384	India	EPI_ISL_699668	male	50	live	Pharyngeal swab
IND_385	India	EPI_ISL_699695	female	34	live	Pharyngeal swab
IND_386	India	EPI_ISL_515939	male	22	released	Pharyngeal swab
IND_387	India	EPI_ISL_467040	male	77	live	unknown
IND_388	India	EPI_ISL_496542	female	13	live	unknown
IND_389	India	EPI_ISL_486403	male	45	live	unknown
IND_39	India	EPI_ISL_700048	male	32	live	Pharyngeal swab
IND_390	India	EPI_ISL_476858	male	44	live	unknown
IND_391	India	EPI_ISL_495033	male	53	released	unknown
IND_392	India	EPI_ISL_699796	male	8	live	Pharyngeal swab
IND_393	India	EPI_ISL_699893	male	18	live	Pharyngeal swab
IND_394	India	EPI_ISL_700072	female	55	deceased	Pharyngeal swab
IND_395	India	EPI_ISL_699704	female	55	deceased	Pharyngeal swab
IND_396	India	EPI_ISL_454544	female	35	mild	unknown
IND_397	India	EPI_ISL_586568	female	49	released	unknown
IND_398	India	EPI_ISL_479534	female	61	live	unknown
IND_399	India	EPI_ISL_483826	female	29	released	unknown
IND_4	India	EPI_ISL_455027	male	51	released	unknown
IND_40	India	EPI_ISL_528813	female	21	live	Pharyngeal swab
IND_400	India	EPI_ISL_700150	female	35	live	Pharyngeal swab
IND_401	India	EPI_ISL_699923	male	22	live	Pharyngeal swab
IND_402	India	EPI_ISL_700289	male	25	live	Pharyngeal swab
IND_403	India	EPI_ISL_641344	female	36	live	Pharyngeal swab
IND_404	India	EPI_ISL_700274	female	26	live	Pharyngeal swab
IND_405	India	EPI_ISL_458086	female	70	live	unknown
IND_406	India	EPI_ISL_483849	male	62	released	unknown
IND_407	India	EPI_ISL_700053	male	66	live	Pharyngeal swab
IND_408	India	EPI_ISL_459922	male	28	live	Pharyngeal swab, serum
IND_409	India	EPI_ISL_447555	male	6	released	unknown
IND_41	India	EPI_ISL_514612	male	50	deceased	unknown
IND_410	India	EPI_ISL_514609	male	21	released	unknown
IND_411	India	EPI_ISL_699725	male	31	live	Pharyngeal swab
IND_412	India	EPI_ISL_495080	female	79	released	Pharyngeal swab
IND_413	India	EPI_ISL_486394	male	60	live	unknown
IND_414	India	EPI_ISL_586549	male	28	released	unknown
IND_415	India	EPI_ISL_475045	male	32	released	unknown
IND_416	India	EPI_ISL_699820	male	50	live	Pharyngeal swab
IND_417	India	EPI_ISL_476879	male	65	released	unknown
IND_418	India	EPI_ISL_525420	female	47	released	unknown
IND_419	India	EPI_ISL_700318	male	31	live	Pharyngeal swab
IND_42	India	EPI_ISL_495066	male	26	released	unknown
IND_420	India	EPI_ISL_586526	female	30	released	unknown
IND_421	India	EPI_ISL_476884	male	27	live	unknown
IND_422	India	EPI_ISL_447039	female	52	released	unknown
IND_423	India	EPI_ISL_483850	female	58	released	unknown
IND_424	India	EPI_ISL_700290	male	56	live	Pharyngeal swab
IND_425	India	EPI_ISL_514437	male	59	live	unknown
IND_426	India	EPI_ISL_700149	female	33	live	Pharyngeal swab
IND_427	India	EPI_ISL_512060	female	43	released	unknown
IND_428	India	EPI_ISL_524766	male	62	released	unknown
IND_429	India	EPI_ISL_496587	male	32	live	unknown
IND_43	India	EPI_ISL_586552	male	30	released	unknown
IND_430	India	EPI_ISL_454831	female	49	live	Pharyngeal swab
IND_431	India	EPI_ISL_699955	male	56	live	Pharyngeal swab
IND_432	India	EPI_ISL_641332	male	35	live	Pharyngeal swab
IND_433	India	EPI_ISL_700202	female	41	live	Pharyngeal swab
IND_434	India	EPI_ISL_700025	female	45	live	Pharyngeal swab
IND_435	India	EPI_ISL_475033	female	55	released	unknown
IND_436	India	EPI_ISL_516973	female	23	live	unknown
IND_437	India	EPI_ISL_699753	female	45	live	Pharyngeal swab
IND_438	India	EPI_ISL_476860	male	66	released	unknown
IND_439	India	EPI_ISL_699856	female	17	live	Pharyngeal swab
IND_44	India	EPI_ISL_699854	male	33	live	Pharyngeal swab
IND_440	India	EPI_ISL_699839	male	34	live	Pharyngeal swab
IND_441	India	EPI_ISL_586550	male	28	released	unknown
IND_442	India	EPI_ISL_495064	male	55	deceased	unknown
IND_443	India	EPI_ISL_514610	female	60	released	unknown
IND_444	India	EPI_ISL_528811	male	25	live	Pharyngeal swab
IND_445	India	EPI_ISL_605807	male	50	live	Pharyngeal swab
IND_446	India	EPI_ISL_438138	male	63	deceased	Pharyngeal swab
IND_447	India	EPI_ISL_700107	male	66	live	Pharyngeal swab
IND_448	India	EPI_ISL_524747	male	40	deceased	unknown
IND_449	India	EPI_ISL_699671	female	25	live	Pharyngeal swab
IND_45	India	EPI_ISL_516971	male	21	live	unknown
IND_450	India	EPI_ISL_699989	male	33	live	Pharyngeal swab
IND_451	India	EPI_ISL_437454	female	52	deceased	Pharyngeal swab
IND_452	India	EPI_ISL_699974	male	39	live	Pharyngeal swab
IND_453	India	EPI_ISL_455025	female	22	released	unknown
IND_454	India	EPI_ISL_483871	female	49	released	unknown
IND_455	India	EPI_ISL_496534	male	40	live	unknown
IND_456	India	EPI_ISL_524728	female	64	released	unknown
IND_457	India	EPI_ISL_467036	female	55	released	unknown
IND_458	India	EPI_ISL_700195	male	25	live	Pharyngeal swab
IND_459	India	EPI_ISL_450324	female	65	live	Pharyngeal swab
IND_46	India	EPI_ISL_475031	male	70	released	unknown
IND_460	India	EPI_ISL_700168	female	26	live	Pharyngeal swab
IND_461	India	EPI_ISL_495045	male	43	released	unknown
IND_462	India	EPI_ISL_699818	male	35	live	Pharyngeal swab
IND_463	India	EPI_ISL_700096	male	19	live	Pharyngeal swab
IND_464	India	EPI_ISL_500947	male	58	released	unknown
IND_465	India	EPI_ISL_700004	male	63	live	Pharyngeal swab
IND_466	India	EPI_ISL_452198	male	22	mild	unknown
IND_467	India	EPI_ISL_514587	male	65	deceased	unknown
IND_468	India	EPI_ISL_700320	male	48	live	Pharyngeal swab
IND_469	India	EPI_ISL_454532	female	45	mild	unknown
IND_47	India	EPI_ISL_700303	male	40	live	Pharyngeal swab
IND_470	India	EPI_ISL_516952	male	55	live	unknown
IND_471	India	EPI_ISL_699772	male	21	live	Pharyngeal swab
IND_472	India	EPI_ISL_495049	female	50	released	unknown
IND_473	India	EPI_ISL_454551	female	63	mild	unknown
IND_474	India	EPI_ISL_699711	female	15	live	Pharyngeal swab
IND_476	India	EPI_ISL_699814	male	34	live	Pharyngeal swab
IND_477	India	EPI_ISL_700067	male	60	live	Pharyngeal swab
IND_478	India	EPI_ISL_435051	male	66	deceased	Pharyngeal swab
IND_479	India	EPI_ISL_452194	male	3	mild	unknown
IND_48	India	EPI_ISL_699751	female	64	live	Pharyngeal swab
IND_480	India	EPI_ISL_699886	male	29	live	Pharyngeal swab
IND_481	India	EPI_ISL_444482	male	18	released	Pharyngeal swab
IND_482	India	EPI_ISL_461501	male	50	deceased	unknown
IND_483	India	EPI_ISL_469041	male	42	released	unknown
IND_484	India	EPI_ISL_495026	male	65	released	unknown
IND_485	India	EPI_ISL_699783	male	44	live	Pharyngeal swab
IND_486	India	EPI_ISL_491478	male	29	live	unknown
IND_487	India	EPI_ISL_496557	male	10	live	unknown
IND_488	India	EPI_ISL_699680	male	20	live	Pharyngeal swab
IND_489	India	EPI_ISL_699985	female	54	live	Pharyngeal swab
IND_49	India	EPI_ISL_476862	male	32	released	unknown
IND_490	India	EPI_ISL_461490	female	45	live	unknown
IND_491	India	EPI_ISL_699917	male	28	live	Pharyngeal swab
IND_492	India	EPI_ISL_641370	male	61	live	Pharyngeal swab
IND_494	India	EPI_ISL_700240	male	50	live	Pharyngeal swab
IND_495	India	EPI_ISL_515943	female	13	released	Pharyngeal swab
IND_496	India	EPI_ISL_524724	male	48	deceased	unknown
IND_497	India	EPI_ISL_700199	female	28	live	Pharyngeal swab
IND_498	India	EPI_ISL_700164	female	55	live	Pharyngeal swab
IND_499	India	EPI_ISL_476891	male	38	live	unknown
IND_5	India	EPI_ISL_699919	male	38	live	Pharyngeal swab
IND_50	India	EPI_ISL_700027	male	43	live	Pharyngeal swab
IND_500	India	EPI_ISL_586533	male	35	released	unknown
IND_501	India	EPI_ISL_516982	female	8	live	unknown
IND_502	India	EPI_ISL_458102	female	80	live	unknown
IND_503	India	EPI_ISL_590690	male	21	released	unknown
IND_504	India	EPI_ISL_699835	male	65	live	Pharyngeal swab
IND_505	India	EPI_ISL_495068	male	52	released	unknown
IND_506	India	EPI_ISL_475050	male	38	released	unknown
IND_507	India	EPI_ISL_699730	female	56	live	Pharyngeal swab
IND_508	India	EPI_ISL_452203	female	62	mild	unknown
IND_509	India	EPI_ISL_459937	female	74	live	serum, urine
IND_51	India	EPI_ISL_447542	male	33	released	unknown
IND_510	India	EPI_ISL_447043	female	42	released	unknown
IND_511	India	EPI_ISL_700046	male	40	live	Pharyngeal swab
IND_512	India	EPI_ISL_641351	female	24	live	Pharyngeal swab
IND_513	India	EPI_ISL_458093	male	65	live	unknown
IND_514	India	EPI_ISL_699936	female	58	live	Pharyngeal swab
IND_515	India	EPI_ISL_700145	male	62	live	Pharyngeal swab
IND_516	India	EPI_ISL_515962	female	19	released	Pharyngeal swab
IND_517	India	EPI_ISL_476022	male	23	live	Pharyngeal swab
IND_518	India	EPI_ISL_483833	male	42	released	unknown
IND_519	India	EPI_ISL_479521	female	70	live	unknown
IND_52	India	EPI_ISL_459935	female	36	live	Pharyngeal swab, serum
IND_520	India	EPI_ISL_699962	male	66	live	Pharyngeal swab
IND_521	India	EPI_ISL_437442	female	7	released	Pharyngeal swab
IND_522	India	EPI_ISL_699667	male	34	live	Pharyngeal swab
IND_523	India	EPI_ISL_515936	male	29	released	Pharyngeal swab
IND_524	India	EPI_ISL_524751	male	30	released	unknown
IND_525	India	EPI_ISL_605811	male	32	live	Pharyngeal swab	Patient acquired infection from community
IND_526	India	EPI_ISL_700111	male	43	live	Pharyngeal swab
IND_527	India	EPI_ISL_700183	male	38	live	Pharyngeal swab
IND_528	India	EPI_ISL_515959	male	23	released	Pharyngeal swab
IND_529	India	EPI_ISL_483867	male	63	released	unknown
IND_53	India	EPI_ISL_700044	male	49	live	Pharyngeal swab
IND_530	India	EPI_ISL_426414	male	37	released	Pharyngeal swab
IND_531	India	EPI_ISL_497886	male	75	live	unknown
IND_532	India	EPI_ISL_700080	male	55	live	Pharyngeal swab
IND_533	India	EPI_ISL_469034	male	67	deceased	unknown
IND_534	India	EPI_ISL_495053	male	42	released	unknown
IND_535	India	EPI_ISL_586567	female	49	released	unknown
IND_536	India	EPI_ISL_454524	male	37	mild	unknown
IND_537	India	EPI_ISL_516944	male	32	live	unknown
IND_538	India	EPI_ISL_699799	male	57	live	Pharyngeal swab
IND_539	India	EPI_ISL_699764	male	11	live	Pharyngeal swab
IND_54	India	EPI_ISL_475052	male	39	released	unknown
IND_540	India	EPI_ISL_476857	male	44	live	unknown
IND_541	India	EPI_ISL_514591	male	55	released	unknown
IND_542	India	EPI_ISL_444465	male	53	released	Pharyngeal swab
IND_543	India	EPI_ISL_699861	female	13	live	Pharyngeal swab
IND_544	India	EPI_ISL_700012	male	65	live	Pharyngeal swab
IND_545	India	EPI_ISL_512076	male	40	released	unknown
IND_546	India	EPI_ISL_458089	female	75	live	unknown
IND_547	India	EPI_ISL_483846	female	29	released	unknown
IND_548	India	EPI_ISL_700286	male	57	live	Pharyngeal swab
IND_549	India	EPI_ISL_700214	female	20	live	Pharyngeal swab
IND_55	India	EPI_ISL_486383	male	58	live	unknown
IND_551	India	EPI_ISL_483829	male	41	released	unknown
IND_552	India	EPI_ISL_699943	female	53	live	Pharyngeal swab
IND_553	India	EPI_ISL_700130	male	42	live	Pharyngeal swab
IND_554	India	EPI_ISL_699840	female	31	live	Pharyngeal swab
IND_555	India	EPI_ISL_516965	male	27	live	unknown
IND_556	India	EPI_ISL_586529	male	57	released	unknown
IND_557	India	EPI_ISL_700317	female	28	live	unknown
IND_558	India	EPI_ISL_699745	male	55	live	Pharyngeal swab
IND_559	India	EPI_ISL_476876	female	59	released	unknown
IND_56	India	EPI_ISL_452201	female	12	mild	unknown
IND_560	India	EPI_ISL_459942	male	32	live	Pharyngeal swab, serum
IND_561	India	EPI_ISL_447535	male	30	released	unknown
IND_562	India	EPI_ISL_450781	male	24	released	unknown
IND_563	India	EPI_ISL_700033	male	33	live	Pharyngeal swab
IND_564	India	EPI_ISL_514606	male	25	released	unknown
IND_565	India	EPI_ISL_495072	male	45	released	unknown
IND_566	India	EPI_ISL_586546	male	45	released	unknown
IND_567	India	EPI_ISL_586525	male	28	released	unknown
IND_568	India	EPI_ISL_476887	male	6	live	unknown
IND_569	India	EPI_ISL_475029	female	54	released	unknown
IND_57	India	EPI_ISL_699732	female	40	live	Pharyngeal swab
IND_570	India	EPI_ISL_516969	male	54	live	unknown
IND_571	India	EPI_ISL_699749	male	75	live	Pharyngeal swab
IND_572	India	EPI_ISL_459921	male	23	live	serum
IND_573	India	EPI_ISL_700050	female	26	live	Pharyngeal swab
IND_574	India	EPI_ISL_475046	male	32	released	unknown
IND_575	India	EPI_ISL_486397	male	13	live	unknown
IND_576	India	EPI_ISL_699726	male	20	live	Pharyngeal swab
IND_577	India	EPI_ISL_699823	male	44	live	Pharyngeal swab
IND_578	India	EPI_ISL_524713	male	75	released	unknown
IND_579	India	EPI_ISL_699920	male	37	live	Pharyngeal swab
IND_58	India	EPI_ISL_590692	female	36	released	unknown
IND_580	India	EPI_ISL_641347	male	22	live	Pharyngeal swab
IND_581	India	EPI_ISL_700277	male	28	live	Pharyngeal swab
IND_582	India	EPI_ISL_483825	female	63	released	unknown
IND_583	India	EPI_ISL_641328	male	28	live	Pharyngeal swab
IND_584	India	EPI_ISL_479537	female	70	live	unknown
IND_585	India	EPI_ISL_496560	male	32	live	unknown
IND_586	India	EPI_ISL_447577	female	20	recovered	Pharyngeal swab
IND_587	India	EPI_ISL_700071	male	57	live	Pharyngeal swab
IND_588	India	EPI_ISL_699802	male	31	live	Pharyngeal swab
IND_589	India	EPI_ISL_469038	male	61	deceased	unknown
IND_59	India	EPI_ISL_699837	male	42	live	Pharyngeal swab
IND_590	India	EPI_ISL_454547	male	23	mild	unknown
IND_591	India	EPI_ISL_699795	male	12	live	Pharyngeal swab
IND_592	India	EPI_ISL_454528	male	50	mild	unknown
IND_593	India	EPI_ISL_516948	male	19	live	unknown
IND_594	India	EPI_ISL_495030	male	67	released	unknown
IND_595	India	EPI_ISL_699890	male	46	live	Pharyngeal swab
IND_596	India	EPI_ISL_444469	male	37	released	Pharyngeal swab
IND_597	India	EPI_ISL_699993	male	42	live	Pharyngeal swab
IND_598	India	EPI_ISL_699696	male	30	live	Pharyngeal swab
IND_599	India	EPI_ISL_479516	male	40	live	unknown
IND_6	India	EPI_ISL_437439	male	41	released	Pharyngeal swab
IND_60	India	EPI_ISL_699858	male	43	live	Pharyngeal swab
IND_600	India	EPI_ISL_496541	male	32	live	unknown
IND_601	India	EPI_ISL_467043	female	62	deceased	unknown
IND_602	India	EPI_ISL_486400	male	34	live	unknown
IND_603	India	EPI_ISL_700172	male	21	live	Pharyngeal swab
IND_604	India	EPI_ISL_524732	male	54	deceased	unknown
IND_605	India	EPI_ISL_515955	male	28	released	Pharyngeal swab
IND_606	India	EPI_ISL_454865	male	23	live	Pharyngeal swab	ESIC Medical College and Hospital
IND_607	India	EPI_ISL_700256	female	36	live	Pharyngeal swab
IND_608	India	EPI_ISL_641366	male	32	live	Pharyngeal swab
IND_609	India	EPI_ISL_461486	male	83	live	unknown
IND_61	India	EPI_ISL_476893	male	31	live	unknown
IND_610	India	EPI_ISL_447855	female	26	recovered	Pharyngeal swab
IND_611	India	EPI_ISL_451162	female	25	released	unknown
IND_612	India	EPI_ISL_699857	male	52	live	Pharyngeal swab
IND_613	India	EPI_ISL_476861	male	32	released	unknown
IND_614	India	EPI_ISL_699752	male	28	live	Pharyngeal swab
IND_615	India	EPI_ISL_475032	male	33	released	unknown
IND_616	India	EPI_ISL_516972	male	51	live	unknown
IND_617	India	EPI_ISL_700024	female	20	live	Pharyngeal swab
IND_618	India	EPI_ISL_528810	male	25	live	Pharyngeal swab
IND_619	India	EPI_ISL_514611	male	50	deceased	unknown
IND_62	India	EPI_ISL_586531	male	38	released	unknown
IND_620	India	EPI_ISL_586551	male	30	released	unknown
IND_621	India	EPI_ISL_495065	male	26	released	unknown
IND_622	India	EPI_ISL_699838	female	34	live	Pharyngeal swab
IND_623	India	EPI_ISL_512061	female	20	released	unknown
IND_624	India	EPI_ISL_451158	male	72	released	unknown
IND_625	India	EPI_ISL_514436	male	42	quarantine	unknown
IND_626	India	EPI_ISL_700291	female	41	live	Pharyngeal swab
IND_627	India	EPI_ISL_479543	female	58	live	unknown
IND_628	India	EPI_ISL_483851	male	44	released	unknown
IND_629	India	EPI_ISL_700203	male	55	live	Pharyngeal swab
IND_63	India	EPI_ISL_458100	female	75	live	unknown
IND_630	India	EPI_ISL_641333	male	78	live	Pharyngeal swab
IND_631	India	EPI_ISL_699954	male	27	live	Pharyngeal swab
IND_632	India	EPI_ISL_700127	female	50	live	Pharyngeal swab
IND_633	India	EPI_ISL_454830	male	55	live	unknown
IND_634	India	EPI_ISL_700097	male	59	live	Pharyngeal swab
IND_635	India	EPI_ISL_586570	male	33	released	unknown
IND_636	India	EPI_ISL_495044	male	43	released	unknown
IND_637	India	EPI_ISL_525419	female	47	released	unknown
IND_638	India	EPI_ISL_476840	male	53	live	Pharyngeal swab
IND_639	India	EPI_ISL_699773	male	53	live	Pharyngeal swab
IND_64	India	EPI_ISL_516980	male	44	live	unknown
IND_640	India	EPI_ISL_700321	female	65	live	Pharyngeal swab
IND_641	India	EPI_ISL_516953	male	41	live	unknown
IND_642	India	EPI_ISL_454533	male	53	mild	unknown
IND_643	India	EPI_ISL_514586	female	62	released	unknown
IND_644	India	EPI_ISL_700005	male	46	live	Pharyngeal swab
IND_645	India	EPI_ISL_452199	female	65	mild	unknown
IND_646	India	EPI_ISL_431101	male	24	released	Pharyngeal swab	Visit to Dubai 3 days trip
IND_647	India	EPI_ISL_500946	female	70	released	unknown
IND_648	India	EPI_ISL_428485	male	32	live	unknown
IND_649	India	EPI_ISL_699975	male	34	live	Pharyngeal swab
IND_65	India	EPI_ISL_483831	male	55	released	unknown
IND_650	India	EPI_ISL_699988	male	49	live	Pharyngeal swab
IND_651	India	EPI_ISL_699670	female	29	live	Pharyngeal swab
IND_652	India	EPI_ISL_524746	female	62	released	unknown
IND_653	India	EPI_ISL_438139	female	63	released	Pharyngeal swab	Travel History from Dubai
IND_654	India	EPI_ISL_605806	male	29	live	Pharyngeal swab	Patient acquired infection in congregation
IND_655	India	EPI_ISL_700169	female	50	live	Pharyngeal swab
IND_656	India	EPI_ISL_450325	male	37	live	Pharyngeal swab
IND_657	India	EPI_ISL_700194	female	32	live	Pharyngeal swab
IND_658	India	EPI_ISL_524729	male	32	released	unknown
IND_659	India	EPI_ISL_467037	male	42	released	unknown
IND_66	India	EPI_ISL_479523	male	43	live	unknown
IND_660	India	EPI_ISL_483870	female	49	released	unknown
IND_661	India	EPI_ISL_497891	male	44	live	unknown
IND_662	India	EPI_ISL_455024	male	38	released	unknown
IND_663	India	EPI_ISL_699979	male	34	live	Pharyngeal swab
IND_664	India	EPI_ISL_699984	male	74	live	Pharyngeal swab
IND_665	India	EPI_ISL_479501	male	48	live	unknown
IND_666	India	EPI_ISL_699681	male	65	live	Pharyngeal swab
IND_667	India	EPI_ISL_467054	female	60	live	unknown
IND_668	India	EPI_ISL_496556	female	60	live	unknown
IND_669	India	EPI_ISL_700198	male	32	live	Pharyngeal swab
IND_67	India	EPI_ISL_700128	male	27	live	Pharyngeal swab
IND_670	India	EPI_ISL_515942	male	22	released	Pharyngeal swab
IND_671	India	EPI_ISL_524725	male	31	released	unknown
IND_672	India	EPI_ISL_700241	male	66	live	Pharyngeal swab
IND_673	India	EPI_ISL_497765	female	42	live	unknown
IND_674	India	EPI_ISL_641371	male	27	live	Pharyngeal swab
IND_675	India	EPI_ISL_699916	male	12	live	Pharyngeal swab
IND_676	India	EPI_ISL_461491	male	60	live	unknown
IND_677	India	EPI_ISL_700066	female	44	deceased	Pharyngeal swab
IND_678	India	EPI_ISL_699815	female	50	live	Pharyngeal swab
IND_679	India	EPI_ISL_699710	female	31	live	Pharyngeal swab
IND_68	India	EPI_ISL_515960	male	35	released	Pharyngeal swab
IND_680	India	EPI_ISL_454550	female	20	mild	unknown
IND_681	India	EPI_ISL_495048	female	50	released	unknown
IND_682	India	EPI_ISL_495027	female	55	released	unknown
IND_683	India	EPI_ISL_491479	male	32	live	unknown
IND_684	India	EPI_ISL_699782	male	39	live	Pharyngeal swab
IND_685	India	EPI_ISL_586513	female	54	released	unknown
IND_686	India	EPI_ISL_461500	female	72	deceased	unknown
IND_687	India	EPI_ISL_469040	male	48	live	unknown
IND_688	India	EPI_ISL_699887	female	52	live	Pharyngeal swab
IND_689	India	EPI_ISL_444483	male	30	deceased	Pharyngeal swab
IND_69	India	EPI_ISL_700147	male	87	deceased	Pharyngeal swab
IND_690	India	EPI_ISL_452195	female	75	mild	unknown
IND_691	India	EPI_ISL_700009	female	42	live	Pharyngeal swab
IND_692	India	EPI_ISL_435050	female	42	released	Pharyngeal swab
IND_693	India	EPI_ISL_515963	male	30	released	Pharyngeal swab
IND_694	India	EPI_ISL_476023	male	38	live	Pharyngeal swab
IND_695	India	EPI_ISL_700144	male	50	live	Pharyngeal swab
IND_696	India	EPI_ISL_699937	male	60	live	Pharyngeal swab
IND_697	India	EPI_ISL_641350	female	23	live	Pharyngeal swab
IND_698	India	EPI_ISL_700260	female	31	live	Pharyngeal swab
IND_699	India	EPI_ISL_458092	male	65	live	unknown
IND_7	India	EPI_ISL_700221	female	60	live	Pharyngeal swab
IND_70	India	EPI_ISL_451157	female	1	released	unknown	ESIC Medical College and Hospital
IND_700	India	EPI_ISL_479520	female	65	live	unknown
IND_701	India	EPI_ISL_483832	male	55	released	unknown
IND_702	India	EPI_ISL_699958	female	33	live	Pharyngeal swab
IND_703	India	EPI_ISL_458103	male	50	released	unknown
IND_704	India	EPI_ISL_516983	female	19	live	unknown
IND_705	India	EPI_ISL_476890	male	29	live	Pharyngeal swab
IND_706	India	EPI_ISL_586532	male	38	released	unknown
IND_707	India	EPI_ISL_700028	male	28	live	Pharyngeal swab
IND_708	India	EPI_ISL_447042	male	24	released	unknown
IND_709	India	EPI_ISL_700047	male	33	live	Pharyngeal swab
IND_71	India	EPI_ISL_699934	male	38	live	Pharyngeal swab
IND_710	India	EPI_ISL_459936	female	26	live	Pharyngeal swab, serum and urine
IND_711	India	EPI_ISL_699731	male	46	live	Pharyngeal swab
IND_712	India	EPI_ISL_452202	male	26	mild	unknown
IND_713	India	EPI_ISL_495069	male	33	released	unknown
IND_714	India	EPI_ISL_475051	male	38	released	unknown
IND_715	India	EPI_ISL_699834	female	19	live	Pharyngeal swab
IND_716	India	EPI_ISL_590691	female	36	released	unknown
IND_717	India	EPI_ISL_495052	male	42	released	unknown
IND_718	India	EPI_ISL_586566	female	45	deceased	unknown
IND_719	India	EPI_ISL_469035	male	67	deceased	unknown
IND_72	India	EPI_ISL_458091	female	56	live	unknown
IND_720	India	EPI_ISL_700081	male	40	live	Pharyngeal swab
IND_721	India	EPI_ISL_431117	male	21	released	Pharyngeal swab	Travel history from United kingdom
IND_722	India	EPI_ISL_500950	male	21	released	unknown
IND_723	India	EPI_ISL_700013	female	50	live	Pharyngeal swab
IND_724	India	EPI_ISL_699860	female	37	live	Pharyngeal swab
IND_725	India	EPI_ISL_514590	male	63	released	unknown
IND_726	India	EPI_ISL_476856	male	34	live	unknown
IND_727	India	EPI_ISL_699765	male	35	live	Pharyngeal swab
IND_728	India	EPI_ISL_516945	male	26	live	unknown
IND_729	India	EPI_ISL_454525	male	41	mild	unknown
IND_73	India	EPI_ISL_641353	female	30	live	Pharyngeal swab
IND_730	India	EPI_ISL_699798	male	60	live	Pharyngeal swab
IND_731	India	EPI_ISL_700110	male	50	live	Pharyngeal swab
IND_732	India	EPI_ISL_605810	female	40	live	Pharyngeal swab	Patient infected while traveling
IND_733	India	EPI_ISL_515937	male	37	released	Pharyngeal swab
IND_734	India	EPI_ISL_524750	male	65	deceased	unknown
IND_735	India	EPI_ISL_699666	male	2	live	Pharyngeal swab
IND_736	India	EPI_ISL_700234	female	8	live	Pharyngeal swab
IND_737	India	EPI_ISL_699963	male	54	deceased	Pharyngeal swab
IND_738	India	EPI_ISL_497887	male	75	live	unknown
IND_739	India	EPI_ISL_426415	male	37	released	Pharyngeal swab
IND_74	India	EPI_ISL_700263	male	29	live	Pharyngeal swab
IND_740	India	EPI_ISL_483866	female	55	deceased	unknown
IND_741	India	EPI_ISL_515958	male	30	released	Pharyngeal swab
IND_742	India	EPI_ISL_459943	female	35	live	Pharyngeal swab, serum
IND_743	India	EPI_ISL_447534	female	9	released	unknown
IND_744	India	EPI_ISL_476877	female	59	released	unknown
IND_745	India	EPI_ISL_699744	male	27	live	Pharyngeal swab	Travel history from United kingdom
IND_746	India	EPI_ISL_516964	male	29	live	unknown
IND_747	India	EPI_ISL_700316	male	64	live	Pharyngeal swab
IND_748	India	EPI_ISL_586528	male	73	released	unknown
IND_749	India	EPI_ISL_699841	female	65	live	Pharyngeal swab
IND_75	India	EPI_ISL_495024	male	50	released	unknown
IND_750	India	EPI_ISL_495073	male	53	released	unknown
IND_751	India	EPI_ISL_586547	male	45	released	unknown
IND_752	India	EPI_ISL_514607	male	25	released	unknown
IND_753	India	EPI_ISL_700287	female	80	live	Pharyngeal swab
IND_754	India	EPI_ISL_483847	female	29	released	unknown
IND_755	India	EPI_ISL_458088	male	51	live	unknown
IND_756	India	EPI_ISL_512077	female	67	deceased	unknown
IND_757	India	EPI_ISL_700131	female	46	live	Pharyngeal swab
IND_758	India	EPI_ISL_699942	male	39	live	Pharyngeal swab
IND_759	India	EPI_ISL_641325	female	23	live	Pharyngeal swab
IND_76	India	EPI_ISL_444480	male	60	deceased	Pharyngeal swab
IND_760	India	EPI_ISL_700215	male	42	live	Pharyngeal swab
IND_761	India	EPI_ISL_483828	male	58	released	unknown
IND_762	India	EPI_ISL_700276	male	29	live	Pharyngeal swab
IND_763	India	EPI_ISL_641346	male	52	live	Pharyngeal swab
IND_764	India	EPI_ISL_699921	female	42	live	Pharyngeal swab
IND_765	India	EPI_ISL_479536	female	60	live	unknown
IND_766	India	EPI_ISL_483824	female	70	deceased	unknown
IND_767	India	EPI_ISL_700219	male	32	live	Pharyngeal swab
IND_768	India	EPI_ISL_641329	male	65	live	Pharyngeal swab
IND_769	India	EPI_ISL_525422	male	62	released	unknown
IND_77	India	EPI_ISL_514589	male	63	released	unknown
IND_770	India	EPI_ISL_699748	female	22	live	Pharyngeal swab
IND_771	India	EPI_ISL_475028	female	54	released	unknown
IND_772	India	EPI_ISL_586524	male	28	released	unknown
IND_773	India	EPI_ISL_476886	female	11	live	unknown
IND_774	India	EPI_ISL_516968	female	45	live	unknown
IND_775	India	EPI_ISL_699822	male	38	live	Pharyngeal swab
IND_776	India	EPI_ISL_699727	male	10	live	Pharyngeal swab
IND_777	India	EPI_ISL_475047	female	50	deceased	unknown
IND_778	India	EPI_ISL_486396	male	90	live	unknown
IND_779	India	EPI_ISL_451666	male	54	released	unknown
IND_78	India	EPI_ISL_699884	male	32	live	Pharyngeal swab
IND_780	India	EPI_ISL_437626	male	70	released	Pharyngeal swab	Travel history from USA Via Dubai to India
IND_781	India	EPI_ISL_700051	male	28	live	Pharyngeal swab
IND_782	India	EPI_ISL_459920	male	46	quarantine	Pharyngeal swab
IND_783	India	EPI_ISL_486401	male	23	live	unknown
IND_784	India	EPI_ISL_467042	female	57	deceased	unknown
IND_785	India	EPI_ISL_496540	male	23	live	unknown
IND_786	India	EPI_ISL_479517	male	64	live	unknown
IND_787	India	EPI_ISL_699697	female	47	live	Pharyngeal swab
IND_788	India	EPI_ISL_700238	female	24	live	Pharyngeal swab
IND_789	India	EPI_ISL_699992	male	22	live	Pharyngeal swab
IND_79	India	EPI_ISL_469043	male	65	released	unknown
IND_790	India	EPI_ISL_447854	male	21	recovered	Pharyngeal swab
IND_791	India	EPI_ISL_497876	female	38	live	unknown
IND_792	India	EPI_ISL_461487	male	83	live	unknown
IND_793	India	EPI_ISL_641367	female	23	live	Pharyngeal swab
IND_794	India	EPI_ISL_524733	male	78	deceased	unknown
IND_795	India	EPI_ISL_454864	male	25	live	Pharyngeal swab	Travel History from Dubai
IND_796	India	EPI_ISL_515954	male	20	released	Pharyngeal swab
IND_797	India	EPI_ISL_699706	male	23	live	Pharyngeal swab
IND_798	India	EPI_ISL_454546	male	19	mild	unknown
IND_799	India	EPI_ISL_469039	male	48	live	unknown
IND_8	India	EPI_ISL_496559	male	27	live	unknown
IND_80	India	EPI_ISL_699879	female	29	live	Pharyngeal swab
IND_800	India	EPI_ISL_699803	male	30	live	Pharyngeal swab
IND_801	India	EPI_ISL_700070	female	55	live	Pharyngeal swab
IND_802	India	EPI_ISL_444468	female	60	released	Pharyngeal swab
IND_803	India	EPI_ISL_699891	male	55	live	Pharyngeal swab
IND_804	India	EPI_ISL_699769	male	41	live	Pharyngeal swab
IND_805	India	EPI_ISL_436137	female	28	live	unknown
IND_806	India	EPI_ISL_699794	female	16	live	Pharyngeal swab
IND_807	India	EPI_ISL_495031	male	67	released	unknown
IND_808	India	EPI_ISL_516949	male	15	live	unknown
IND_809	India	EPI_ISL_454529	male	17	mild	unknown
IND_81	India	EPI_ISL_461503	male	86	live	unknown
IND_810	India	EPI_ISL_699930	female	55	live	Pharyngeal swab
IND_811	India	EPI_ISL_479548	male	30	live	unknown
IND_812	India	EPI_ISL_700267	female	49	live	Pharyngeal swab
IND_813	India	EPI_ISL_641357	female	29	live	Pharyngeal swab
IND_814	India	EPI_ISL_458095	male	58	live	unknown
IND_815	India	EPI_ISL_515964	male	21	released	Pharyngeal swab
IND_816	India	EPI_ISL_700143	male	67	live	Pharyngeal swab
IND_817	India	EPI_ISL_479527	male	58	live	unknown
IND_818	India	EPI_ISL_700208	male	26	live	Pharyngeal swab
IND_819	India	EPI_ISL_641338	female	58	live	Pharyngeal swab
IND_82	India	EPI_ISL_583914	female	40	released	Pharyngeal swab
IND_820	India	EPI_ISL_483835	male	48	released	unknown
IND_821	India	EPI_ISL_444458	male	35	released	Pharyngeal swab
IND_822	India	EPI_ISL_699759	male	38	live	Pharyngeal swab
IND_823	India	EPI_ISL_458104	female	60	released	unknown
IND_824	India	EPI_ISL_516984	female	45	live	unknown
IND_825	India	EPI_ISL_516979	female	34	live	unknown
IND_826	India	EPI_ISL_475039	male	57	released	unknown
IND_827	India	EPI_ISL_586535	female	35	released	unknown
IND_828	India	EPI_ISL_699736	female	50	live	Pharyngeal swab
IND_829	India	EPI_ISL_452205	female	58	mild	unknown
IND_83	India	EPI_ISL_452196	female	12	mild	unknown
IND_830	India	EPI_ISL_486387	female	55	live	unknown
IND_831	India	EPI_ISL_475056	male	58	released	unknown
IND_832	India	EPI_ISL_699833	female	54	live	Pharyngeal swab
IND_833	India	EPI_ISL_447045	male	28	released	unknown
IND_834	India	EPI_ISL_700040	female	29	live	Pharyngeal swab
IND_835	India	EPI_ISL_459931	male	49	live	serum
IND_836	India	EPI_ISL_447546	male	10	released	unknown
IND_837	India	EPI_ISL_467053	female	60	live	unknown
IND_838	India	EPI_ISL_496551	male	68	live	unknown
IND_839	India	EPI_ISL_490106	female	19	live	unknown
IND_84	India	EPI_ISL_435053	female	60	released	Pharyngeal swab
IND_840	India	EPI_ISL_699983	male	37	live	Pharyngeal swab
IND_841	India	EPI_ISL_699686	male	28	live	Pharyngeal swab
IND_842	India	EPI_ISL_700229	male	34	live	Pharyngeal swab
IND_843	India	EPI_ISL_641376	female	44	live	Pharyngeal swab
IND_844	India	EPI_ISL_497762	male	30	live	unknown
IND_845	India	EPI_ISL_700246	male	62	live	Pharyngeal swab
IND_846	India	EPI_ISL_699911	female	54	live	Pharyngeal swab
IND_847	India	EPI_ISL_461496	male	54	live	unknown
IND_848	India	EPI_ISL_700162	female	52	live	Pharyngeal swab
IND_849	India	EPI_ISL_515945	female	16	released	Pharyngeal swab	Patient infected while traveling via Dubai to India
IND_85	India	EPI_ISL_500949	male	21	released	unknown
IND_850	India	EPI_ISL_524722	female	78	released	unknown
IND_851	India	EPI_ISL_469028	male	65	live	unknown
IND_852	India	EPI_ISL_699717	female	71	live	Pharyngeal swab
IND_853	India	EPI_ISL_454557	male	80	mild	unknown
IND_854	India	EPI_ISL_700061	male	26	live	Pharyngeal swab
IND_855	India	EPI_ISL_452192	male	75	mild	unknown
IND_856	India	EPI_ISL_699778	male	57	deceased	Pharyngeal swab
IND_857	India	EPI_ISL_495020	female	68	released	unknown
IND_858	India	EPI_ISL_516958	male	36	live	unknown
IND_859	India	EPI_ISL_454538	male	35	mild	unknown
IND_86	India	EPI_ISL_700098	female	50	live	Pharyngeal swab
IND_860	India	EPI_ISL_586514	female	54	released	unknown
IND_861	India	EPI_ISL_699785	male	7	live	Pharyngeal swab
IND_862	India	EPI_ISL_469047	female	54	released	unknown
IND_863	India	EPI_ISL_699880	female	32	live	Pharyngeal swab
IND_864	India	EPI_ISL_444484	male	28	released	Pharyngeal swab
IND_865	India	EPI_ISL_469024	male	48	live	unknown
IND_866	India	EPI_ISL_495043	male	62	released	unknown
IND_867	India	EPI_ISL_700002	male	45	live	Pharyngeal swab
IND_868	India	EPI_ISL_516076	female	11	released	Pharyngeal swab
IND_869	India	EPI_ISL_699774	female	48	live	Pharyngeal swab
IND_87	India	EPI_ISL_459914	male	29	live	Pharyngeal swab, serum
IND_870	India	EPI_ISL_586518	male	30	released	unknown
IND_871	India	EPI_ISL_516954	male	26	live	unknown
IND_872	India	EPI_ISL_454534	female	5	mild	unknown
IND_873	India	EPI_ISL_699871	male	53	live	Pharyngeal swab
IND_874	India	EPI_ISL_444475	male	20	released	Pharyngeal swab
IND_875	India	EPI_ISL_514581	male	57	released	unknown
IND_876	India	EPI_ISL_524741	female	25	released	unknown
IND_877	India	EPI_ISL_700101	female	12	live	Pharyngeal swab
IND_878	India	EPI_ISL_605801	male	23	live	Pharyngeal swab
IND_879	India	EPI_ISL_437452	female	12	released	Pharyngeal swab
IND_88	India	EPI_ISL_700065	female	35	live	Pharyngeal swab
IND_880	India	EPI_ISL_699972	female	18	live	Pharyngeal swab
IND_881	India	EPI_ISL_699677	female	3	live	Pharyngeal swab
IND_882	India	EPI_ISL_483877	male	32	live	unknown
IND_883	India	EPI_ISL_455023	male	53	released	unknown
IND_884	India	EPI_ISL_486852	female	40	live	Pharyngeal swab
IND_885	India	EPI_ISL_450322	male	35	live	Pharyngeal swab
IND_886	India	EPI_ISL_700193	male	50	live	Pharyngeal swab
IND_887	India	EPI_ISL_515949	female	18	released	Pharyngeal swab
IND_888	India	EPI_ISL_467030	male	72	released	unknown
IND_889	India	EPI_ISL_450791	female	55	released	unknown
IND_89	India	EPI_ISL_699816	male	11	live	Pharyngeal swab
IND_890	India	EPI_ISL_459952	male	27	live	Pharyngeal swab, serum
IND_891	India	EPI_ISL_476866	male	53	released	unknown
IND_892	India	EPI_ISL_586539	male	65	released	unknown
IND_893	India	EPI_ISL_700307	female	12	live	Pharyngeal swab
IND_894	India	EPI_ISL_475035	male	45	released	unknown
IND_895	India	EPI_ISL_516975	male	70	live	unknown
IND_896	India	EPI_ISL_452209	male	25	mild	unknown
IND_897	India	EPI_ISL_586556	female	24	released	unknown
IND_898	India	EPI_ISL_495062	male	75	deceased	unknown
IND_899	India	EPI_ISL_528817	male	60	live	unknown
IND_9	India	EPI_ISL_524745	male	23	released	unknown
IND_90	India	EPI_ISL_479493	female	42	live	unknown
IND_900	India	EPI_ISL_479544	female	38	live	unknown
IND_901	India	EPI_ISL_700296	male	46	live	Pharyngeal swab
IND_902	India	EPI_ISL_483856	male	39	released	unknown
IND_903	India	EPI_ISL_458099	female	40	live	unknown
IND_904	India	EPI_ISL_512066	male	66	deceased	unknown
IND_905	India	EPI_ISL_454858	male	57	live	Pharyngeal swab
IND_906	India	EPI_ISL_515968	male	50	released	Pharyngeal swab
IND_907	India	EPI_ISL_700120	male	66	live	Pharyngeal swab
IND_908	India	EPI_ISL_524760	male	45	deceased	unknown
IND_909	India	EPI_ISL_496581	male	21	live	unknown
IND_91	India	EPI_ISL_454553	male	16	mild	unknown
IND_910	India	EPI_ISL_483839	female	51	released	unknown	ESIC Medical College and Hospital
IND_911	India	EPI_ISL_641334	female	71	live	Pharyngeal swab
IND_912	India	EPI_ISL_700204	male	39	live	Pharyngeal swab
IND_913	India	EPI_ISL_699953	female	65	live	Pharyngeal swab
IND_914	India	EPI_ISL_479510	female	50	live	unknown
IND_915	India	EPI_ISL_437448	female	40	released	Pharyngeal swab
IND_916	India	EPI_ISL_699968	male	52	live	Pharyngeal swab
IND_917	India	EPI_ISL_486406	male	19	live	unknown
IND_918	India	EPI_ISL_467045	male	70	deceased	unknown
IND_919	India	EPI_ISL_524734	male	78	deceased	unknown
IND_92	India	EPI_ISL_699713	female	33	live	Pharyngeal swab
IND_920	India	EPI_ISL_515953	female	35	released	Pharyngeal swab
IND_921	India	EPI_ISL_454863	female	72	live	Pharyngeal swab
IND_922	India	EPI_ISL_700174	male	35	live	Pharyngeal swab
IND_923	India	EPI_ISL_700189	male	58	live	Pharyngeal swab
IND_924	India	EPI_ISL_699907	male	34	live	Pharyngeal swab
IND_925	India	EPI_ISL_461480	female	53	released	unknown
IND_926	India	EPI_ISL_700250	female	12	live	Pharyngeal swab
IND_927	India	EPI_ISL_641360	male	43	live	Pharyngeal swab
IND_928	India	EPI_ISL_700077	female	61	live	Pharyngeal swab
IND_929	India	EPI_ISL_699701	female	32	live	Pharyngeal swab
IND_93	India	EPI_ISL_700166	male	45	live	Pharyngeal swab
IND_930	India	EPI_ISL_413522	female	20	recovered	Pharyngeal swab
IND_931	India	EPI_ISL_454541	male	39	mild	unknown
IND_932	India	EPI_ISL_495059	male	50	live	unknown
IND_933	India	EPI_ISL_699804	male	9	live	Pharyngeal swab
IND_934	India	EPI_ISL_490013	female	50	live	unknown
IND_935	India	EPI_ISL_699793	male	20	live	Pharyngeal swab
IND_936	India	EPI_ISL_700018	male	59	live	Pharyngeal swab
IND_937	India	EPI_ISL_700155	male	33	live	Pharyngeal swab
IND_938	India	EPI_ISL_524715	male	49	released	unknown
IND_939	India	EPI_ISL_515972	male	32	released	Pharyngeal swab
IND_94	India	EPI_ISL_524726	female	60	released	unknown
IND_940	India	EPI_ISL_641341	male	46	live	Pharyngeal swab
IND_941	India	EPI_ISL_700271	female	28	live	Pharyngeal swab
IND_942	India	EPI_ISL_699926	male	77	deceased	Pharyngeal swab
IND_943	India	EPI_ISL_455018	male	44	released	unknown
IND_944	India	EPI_ISL_699949	male	69	deceased	Pharyngeal swab
IND_945	India	EPI_ISL_479531	female	72	live	unknown
IND_946	India	EPI_ISL_483823	male	46	released	unknown
IND_947	India	EPI_ISL_458112	male	32	released	unknown
IND_948	India	EPI_ISL_586523	male	34	released	unknown
IND_949	India	EPI_ISL_476881	male	57	live	unknown
IND_95	India	EPI_ISL_515941	male	44	released	Pharyngeal swab
IND_950	India	EPI_ISL_495017	male	45	released	unknown
IND_951	India	EPI_ISL_700039	female	63	deceased	Pharyngeal swab
IND_952	India	EPI_ISL_459948	female	20	live	Pharyngeal swab, serum
IND_953	India	EPI_ISL_700056	male	66	live	Pharyngeal swab
IND_954	India	EPI_ISL_447053	male	66	deceased	unknown
IND_955	India	EPI_ISL_699825	female	22	live	Pharyngeal swab
IND_956	India	EPI_ISL_452213	female	24	mild	unknown
IND_957	India	EPI_ISL_699720	male	7	live	Pharyngeal swab
IND_958	India	EPI_ISL_475040	male	57	released	unknown
IND_959	India	EPI_ISL_495078	male	40	released	unknown
IND_96	India	EPI_ISL_467038	male	42	released	unknown
IND_960	India	EPI_ISL_454560	male	38	live	unknown
IND_961	India	EPI_ISL_699743	female	35	live	Pharyngeal swab
IND_962	India	EPI_ISL_476870	male	24	live	unknown
IND_963	India	EPI_ISL_516963	male	26	live	unknown
IND_964	India	EPI_ISL_700311	male	34	live	Pharyngeal swab
IND_965	India	EPI_ISL_699846	female	23	live	Pharyngeal swab
IND_966	India	EPI_ISL_447030	female	65	released	unknown
IND_967	India	EPI_ISL_459944	female	55	live	Pharyngeal swab, serum
IND_968	India	EPI_ISL_514600	male	38	released	unknown
IND_969	India	EPI_ISL_699829	male	45	live	Pharyngeal swab
IND_97	India	EPI_ISL_700242	male	38	live	Pharyngeal swab
IND_970	India	EPI_ISL_495074	male	53	released	unknown
IND_971	India	EPI_ISL_586540	male	65	released	unknown
IND_972	India	EPI_ISL_512070	female	68	released	unknown
IND_973	India	EPI_ISL_524719	male	70	released	unknown
IND_974	India	EPI_ISL_700280	male	38	live	Pharyngeal swab
IND_975	India	EPI_ISL_479552	female	22	live	unknown
IND_976	India	EPI_ISL_483840	male	15	released	unknown
IND_977	India	EPI_ISL_451149	male	55	released	unknown
IND_978	India	EPI_ISL_699945	female	38	live	Pharyngeal swab
IND_979	India	EPI_ISL_700212	male	35	live	Pharyngeal swab
IND_98	India	EPI_ISL_497766	female	52	live	unknown
IND_980	India	EPI_ISL_641322	male	54	live	Pharyngeal swab
IND_981	India	EPI_ISL_700136	female	28	live	Pharyngeal swab
IND_982	India	EPI_ISL_528820	male	30	live	Pharyngeal swab
IND_983	India	EPI_ISL_700086	male	35	live	Pharyngeal swab
IND_984	India	EPI_ISL_495055	male	67	released	unknown
IND_985	India	EPI_ISL_586561	male	40	released	unknown
IND_986	India	EPI_ISL_699808	male	50	live	Pharyngeal swab
IND_987	India	EPI_ISL_469032	male	62	live	unknown
IND_988	India	EPI_ISL_699867	male	42	live	Pharyngeal swab
IND_989	India	EPI_ISL_514597	female	65	deceased	unknown
IND_99	India	EPI_ISL_641372	male	22	live	Pharyngeal swab
IND_990	India	EPI_ISL_516942	male	55	live	unknown
IND_992	India	EPI_ISL_699661	female	32	live	Pharyngeal swab
IND_993	India	EPI_ISL_699964	male	34	live	Pharyngeal swab
IND_994	India	EPI_ISL_699999	male	25	live	Pharyngeal swab	Travel history from UK Via Dubai to India
IND_995	India	EPI_ISL_467049	male	61	live	unknown
IND_996	India	EPI_ISL_524757	male	37	released	unknown
IND_997	India	EPI_ISL_524738	male	72	released	unknown
IND_998	India	EPI_ISL_700185	male	39	live	Pharyngeal swab
IND_999	India	EPI_ISL_479657	male	75	live	unknown
IDN_1	Indonesia	EPI_ISL_568692	female	30	live	Pharyngeal swab
IDN_10	Indonesia	EPI_ISL_529965	female	77	live	Pharyngeal swab
IDN_11	Indonesia	EPI_ISL_437187	male	51	live	Sputum
IDN_12	Indonesia	EPI_ISL_610155	female	58	live	Pharyngeal swab
IDN_13	Indonesia	EPI_ISL_568693	male	54	live	Pharyngeal swab
IDN_14	Indonesia	EPI_ISL_516829	female	83	live	Pharyngeal swab
IDN_15	Indonesia	EPI_ISL_574610	female	33	live	Pharyngeal swab
IDN_16	Indonesia	EPI_ISL_458079	male	71	live	Sputum
IDN_17	Indonesia	EPI_ISL_437190	male	77	live	Pharyngeal swab
IDN_18	Indonesia	EPI_ISL_707778	male	31	live	Pharyngeal swab
IDN_19	Indonesia	EPI_ISL_610162	male	48	live	Pharyngeal swab
IDN_2	Indonesia	EPI_ISL_574611	male	56	live	Pharyngeal swab
IDN_20	Indonesia	EPI_ISL_574606	female	55	live	Pharyngeal swab
IDN_21	Indonesia	EPI_ISL_568689	female	37	released	Pharyngeal swab
IDN_22	Indonesia	EPI_ISL_529964	male	39	live	Pharyngeal swab
IDN_23	Indonesia	EPI_ISL_576113	male	88	deceased	Pharyngeal swab
IDN_24	Indonesia	EPI_ISL_525492	female	55	live	Pharyngeal swab
IDN_25	Indonesia	EPI_ISL_529718	male	30	live	Pharyngeal swab
IDN_26	Indonesia	EPI_ISL_568686	male	71	live	Pharyngeal swab
IDN_27	Indonesia	EPI_ISL_437189	male	75	deceased	Pharyngeal swab
IDN_28	Indonesia	EPI_ISL_574605	female	54	live	Pharyngeal swab
IDN_29	Indonesia	EPI_ISL_576128	female	33	live	Pharyngeal swab
IDN_3	Indonesia	EPI_ISL_576130	male	8	live	Pharyngeal swab
IDN_30	Indonesia	EPI_ISL_610161	female	64	live	Pharyngeal swab
IDN_31	Indonesia	EPI_ISL_529967	male	75	live	Pharyngeal swab
IDN_32	Indonesia	EPI_ISL_574609	female	34	live	Pharyngeal swab
IDN_33	Indonesia	EPI_ISL_574612	male	41	live	Pharyngeal swab
IDN_34	Indonesia	EPI_ISL_568691	male	54	released	Pharyngeal swab
IDN_35	Indonesia	EPI_ISL_437192	male	62	live	Pharyngeal swab
IDN_36	Indonesia	EPI_ISL_529719	male	55	live	Pharyngeal swab
IDN_37	Indonesia	EPI_ISL_516806	male	30	live	Pharyngeal swab
IDN_38	Indonesia	EPI_ISL_528759	male	37	live	Pharyngeal swab
IDN_39	Indonesia	EPI_ISL_568687	female	37	released	Pharyngeal swab
IDN_4	Indonesia	EPI_ISL_437191	female	25	live	Pharyngeal swab
IDN_40	Indonesia	EPI_ISL_437188	male	46	live	Pharyngeal swab
IDN_41	Indonesia	EPI_ISL_574604	male	31	live	Pharyngeal swab
IDN_42	Indonesia	EPI_ISL_574608	male	54	live	Pharyngeal swab
IDN_43	Indonesia	EPI_ISL_529966	male	40	live	Pharyngeal swab
IDN_44	Indonesia	EPI_ISL_458081	male	39	live	Pharyngeal swab
IDN_45	Indonesia	EPI_ISL_574619	male	11	live	Pharyngeal swab
IDN_46	Indonesia	EPI_ISL_576115	male	58	deceased	Pharyngeal swab
IDN_47	Indonesia	EPI_ISL_528748	male	32	live	Pharyngeal swab
IDN_48	Indonesia	EPI_ISL_518819	male	56	live	Pharyngeal swab
IDN_49	Indonesia	EPI_ISL_574615	male	58	live	Pharyngeal swab
IDN_5	Indonesia	EPI_ISL_610158	male	69	live	Pharyngeal swab
IDN_50	Indonesia	EPI_ISL_467375	female	70	live	Pharyngeal swab
IDN_51	Indonesia	EPI_ISL_528752	male	47	live	Pharyngeal swab
IDN_52	Indonesia	EPI_ISL_529961	male	55	live	Pharyngeal swab
IDN_53	Indonesia	EPI_ISL_574603	male	5	live	Pharyngeal swab
IDN_54	Indonesia	EPI_ISL_632936	female	52	live	Pharyngeal swab
IDN_55	Indonesia	EPI_ISL_574622	female	35	live	Pharyngeal swab
[truncated: 1,779 more rows]

## Sheet: North America
Isolate/Country code	Country	Accession No.	gender	age	Status	specimen source	Additional Information
CAN_1	Canada	EPI_ISL_459879	female	20	Live	unknown
CAN_10	Canada	EPI_ISL_529030	female	50	Live	unknown
CAN_11	Canada	EPI_ISL_459886	male	70	Live	unknown
CAN_12	Canada	EPI_ISL_459877	male	70	Live	unknown
CAN_13	Canada	EPI_ISL_459890	male	60	Live	unknown
CAN_14	Canada	EPI_ISL_459887	female	40	Live	unknown
CAN_15	Canada	EPI_ISL_459891	male	70	Live	unknown
CAN_16	Canada	EPI_ISL_459871	female	40	Released	unknown
CAN_17	Canada	EPI_ISL_515466	male	45	Recovered	Saliva	Private Event
CAN_18	Canada	EPI_ISL_459880	male	50	Live	unknown
CAN_19	Canada	EPI_ISL_459867	male	40	Released	unknown
CAN_2	Canada	EPI_ISL_459884	female	80	Live	unknown
CAN_20	Canada	EPI_ISL_459881	female	50	Live	unknown
CAN_21	Canada	EPI_ISL_459866	female	70	Released	unknown
CAN_22	Canada	EPI_ISL_459873	male	60	Live	unknown
CAN_23	Canada	EPI_ISL_459882	male	20	Live	unknown
CAN_24	Canada	EPI_ISL_459869	female	25	Live	unknown
CAN_25	Canada	EPI_ISL_459872	male	70	Live	unknown
CAN_26	Canada	EPI_ISL_459883	male	60	Live	unknown
CAN_27	Canada	EPI_ISL_459868	female	50	Released	unknown
CAN_3	Canada	EPI_ISL_459875	male	20	Live	unknown
CAN_4	Canada	EPI_ISL_459888	male	70	Live	unknown
CAN_5	Canada	EPI_ISL_459892	female	60	Live	unknown
CAN_6	Canada	EPI_ISL_459885	male	80	Live	unknown
CAN_7	Canada	EPI_ISL_459878	male	80	Live	unknown
CAN_8	Canada	EPI_ISL_459889	female	20	Live	unknown
CAN_9	Canada	EPI_ISL_459874	female	50	Live	unknown
CRI_1	Costa Rica	EPI_ISL_480316	male	87	Deceased	unknown	Travel to Florida
CRI_10	Costa Rica	EPI_ISL_434540	male	40	Live	Pharyngeal swab	Travel from New York
CRI_11	Costa Rica	EPI_ISL_480317	male	73	Released	unknown	Travel to Spain
CRI_12	Costa Rica	EPI_ISL_491444	male	26	Live	unknown
CRI_13	Costa Rica	EPI_ISL_682251	male	84	Deceased	Pharyngeal swab
CRI_14	Costa Rica	EPI_ISL_491448	female	43	Live	unknown
CRI_15	Costa Rica	EPI_ISL_434538	male	62	Live	Pharyngeal swab	Traveled from Argentina & Peru
CRI_16	Costa Rica	EPI_ISL_480320	male	33	Live	unknown
CRI_17	Costa Rica	EPI_ISL_512846	male	52	Deceased	Pharyngeal swab
CRI_18	Costa Rica	EPI_ISL_491452	male	21	Live	Pharyngeal swab	Travel to USA
CRI_19	Costa Rica	EPI_ISL_682266	male	30	Live	Pharyngeal swab
CRI_2	Costa Rica	EPI_ISL_434535	male	18	Live	Pharyngeal swab
CRI_20	Costa Rica	EPI_ISL_491447	female	25	Live	Pharyngeal swab
CRI_21	Costa Rica	EPI_ISL_480318	female	45	Live	unknown
CRI_22	Costa Rica	EPI_ISL_682273	male	23	Live	Pharyngeal swab
CRI_23	Costa Rica	EPI_ISL_682252	male	81	Deceased	Pharyngeal swab
CRI_24	Costa Rica	EPI_ISL_491451	male	66	Live	Pharyngeal swab
CRI_25	Costa Rica	EPI_ISL_480323	male	27	Live	unknown
CRI_26	Costa Rica	EPI_ISL_491446	male	34	Live	unknown
CRI_27	Costa Rica	EPI_ISL_434536	male	39	Live	Pharyngeal swab
CRI_28	Costa Rica	EPI_ISL_480315	male	51	Live	unknown
CRI_29	Costa Rica	EPI_ISL_480319	female	43	Live	unknown	Contact with someone who travel to Mexico
CRI_3	Costa Rica	EPI_ISL_491445	male	56	Live	unknown
CRI_30	Costa Rica	EPI_ISL_480322	female	67	Live	unknown
CRI_31	Costa Rica	EPI_ISL_491450	male	59	Live	Pharyngeal swab	Travel to USA
CRI_32	Costa Rica	EPI_ISL_527753	female	78	Deceased	Pharyngeal swab
CRI_33	Costa Rica	EPI_ISL_682264	female	4	Live	Pharyngeal swab
CRI_34	Costa Rica	EPI_ISL_527742	female	69	Live	Pharyngeal swab
CRI_35	Costa Rica	EPI_ISL_512653	female	10	Live	unknown
CRI_36	Costa Rica	EPI_ISL_491441	female	48	Live	unknown
CRI_37	Costa Rica	EPI_ISL_682242	male	63	Deceased	Pharyngeal swab
CRI_38	Costa Rica	EPI_ISL_480325	male	23	Live	unknown
CRI_39	Costa Rica	EPI_ISL_491457	male	34	Live	Pharyngeal swab	Travel ( destination)
CRI_4	Costa Rica	EPI_ISL_682250	male	81	Deceased	Pharyngeal swab
CRI_40	Costa Rica	EPI_ISL_491438	female	73	Live	unknown
CRI_41	Costa Rica	EPI_ISL_682255	male	59	Live	Pharyngeal swab
CRI_42	Costa Rica	EPI_ISL_491440	female	65	Live	unknown
CRI_43	Costa Rica	EPI_ISL_682262	male	25	Live	Pharyngeal swab
CRI_44	Costa Rica	EPI_ISL_480328	male	26	Live	unknown	Travel to USA
CRI_45	Costa Rica	EPI_ISL_491456	male	45	Deceased	Pharyngeal swab	Travel ( destination)
CRI_46	Costa Rica	EPI_ISL_491439	male	31	Live	Pharyngeal swab	Travel to France
CRI_47	Costa Rica	EPI_ISL_480324	female	47	Live	unknown
CRI_48	Costa Rica	EPI_ISL_491443	male	25	Live	Pharyngeal swab	Travel to USA
CRI_49	Costa Rica	EPI_ISL_512670	male	89	Live	Pharyngeal swab
CRI_5	Costa Rica	EPI_ISL_491449	male	21	Live	Pharyngeal swab
CRI_50	Costa Rica	EPI_ISL_434533	male	47	Live	Pharyngeal swab
CRI_51	Costa Rica	EPI_ISL_682261	male	58	Live	Pharyngeal swab
CRI_52	Costa Rica	EPI_ISL_480327	male	27	Live	unknown
CRI_53	Costa Rica	EPI_ISL_491455	male	36	Live	Pharyngeal swab	Travel ( destination)
CRI_54	Costa Rica	EPI_ISL_682257	female	27	Live	Pharyngeal swab
CRI_55	Costa Rica	EPI_ISL_491442	male	50	Live	unknown
CRI_56	Costa Rica	EPI_ISL_491437	male	49	Live	unknown
CRI_57	Costa Rica	EPI_ISL_491454	female	46	Live	Pharyngeal swab	Travel to Spain
CRI_58	Costa Rica	EPI_ISL_480326	male	58	Live	unknown
CRI_6	Costa Rica	EPI_ISL_458236	male	54	Deceased	unknown
CRI_7	Costa Rica	EPI_ISL_434539	female	25	Live	Pharyngeal swab
CRI_8	Costa Rica	EPI_ISL_491453	female	43	Live	Pharyngeal swab	Travel to Mexico
CRI_9	Costa Rica	EPI_ISL_480321	female	27	Live	unknown
DOM_1	Dominican Republic	EPI_ISL_525470	female	32	Asymptomatic	Pharyngeal swab
DOM_2	Dominican Republic	EPI_ISL_525467	female	23	Asymptomatic	Pharyngeal swab
DOM_4	Dominican Republic	EPI_ISL_525471	female	32	Asymptomatic	Pharyngeal swab
DOM_6	Dominican Republic	EPI_ISL_522406	male	62	Live	Pharyngeal swab
DOM_7	Dominican Republic	EPI_ISL_525468	female	32	Asymptomatic	Pharyngeal swab
DOM_8	Dominican Republic	EPI_ISL_525469	female	32	Asymptomatic	Pharyngeal swab
GLP_1	Guadeloupe	EPI_ISL_613431	male	70	Live	Pharyngeal swab
GLP_10	Guadeloupe	EPI_ISL_613439	female	89	Live	Pharyngeal swab
GLP_11	Guadeloupe	EPI_ISL_613435	female	77	Live	Pharyngeal swab
GLP_12	Guadeloupe	EPI_ISL_613422	female	54	Live	Pharyngeal swab
GLP_13	Guadeloupe	EPI_ISL_613419	female	40	Live	Pharyngeal swab
GLP_14	Guadeloupe	EPI_ISL_613434	male	31	Live	Pharyngeal swab
GLP_15	Guadeloupe	EPI_ISL_613421	female	60	Live	Pharyngeal swab
GLP_16	Guadeloupe	EPI_ISL_613437	male	81	Live	Pharyngeal swab
GLP_17	Guadeloupe	EPI_ISL_613420	female	27	Live	Pharyngeal swab
GLP_18	Guadeloupe	EPI_ISL_613436	female	89	Live	Pharyngeal swab
GLP_2	Guadeloupe	EPI_ISL_613426	female	40	Live	Pharyngeal swab
GLP_3	Guadeloupe	EPI_ISL_613445	male	81	Live	Pharyngeal swab
GLP_4	Guadeloupe	EPI_ISL_613425	male	69	Live	Pharyngeal swab
GLP_6	Guadeloupe	EPI_ISL_613424	male	52	Live	Pharyngeal swab
GLP_7	Guadeloupe	EPI_ISL_613432	male	59	Live	Pharyngeal swab
GLP_8	Guadeloupe	EPI_ISL_613440	female	90	Live	Pharyngeal swab
GLP_9	Guadeloupe	EPI_ISL_613423	female	60	Live	Pharyngeal swab
MEX_1	Mexico	EPI_ISL_516612	male	20	Released	Pharyngeal swab
MEX_10	Mexico	EPI_ISL_576270	male	30	Released	Pharyngeal swab
MEX_100	Mexico	EPI_ISL_522979	female	49	Live	Pharyngeal swab
MEX_101	Mexico	EPI_ISL_493336	male	67	Deceased	Pharyngeal swab
MEX_102	Mexico	EPI_ISL_522984	female	51	Live	Pharyngeal swab
MEX_103	Mexico	EPI_ISL_522876	female	92	Live	Pharyngeal swab
MEX_104	Mexico	EPI_ISL_516615	male	29	Released	Pharyngeal swab
MEX_105	Mexico	EPI_ISL_426364	male	70	Deceased	Pharyngeal swab	Travel to Vail Colorado, USA
MEX_106	Mexico	EPI_ISL_412972	male	35	Live	Pharyngeal swab	Traveled from Bergamo, Italy (Feb 16-22)
MEX_107	Mexico	EPI_ISL_576277	female	78	Released	Pharyngeal swab
MEX_108	Mexico	EPI_ISL_522942	female	25	Live	Pharyngeal swab
MEX_109	Mexico	EPI_ISL_493343	male	72	Released	Pharyngeal swab
MEX_11	Mexico	EPI_ISL_658880	male	41	Released	Pharyngeal swab
MEX_110	Mexico	EPI_ISL_516622	male	20	Released	Pharyngeal swab
MEX_12	Mexico	EPI_ISL_455434	male	33	Released	Pharyngeal swab	Foreign patient from Argentina
MEX_13	Mexico	EPI_ISL_493348	male	92	Deceased	Pharyngeal swab
MEX_14	Mexico	EPI_ISL_516613	female	22	Released	Pharyngeal swab
MEX_15	Mexico	EPI_ISL_522982	female	46	Live	Pharyngeal swab
MEX_16	Mexico	EPI_ISL_576267	male	64	Released	Pharyngeal swab
MEX_17	Mexico	EPI_ISL_455456	female	44	Released	unknown
MEX_18	Mexico	EPI_ISL_658870	female	48	Released	Pharyngeal swab
MEX_19	Mexico	EPI_ISL_455439	male	39	Released	Pharyngeal swab
MEX_2	Mexico	EPI_ISL_658896	female	46	Released	Pharyngeal swab
MEX_20	Mexico	EPI_ISL_516624	male	49	Released	Pharyngeal swab
MEX_21	Mexico	EPI_ISL_493345	female	73	Released	Pharyngeal swab
MEX_22	Mexico	EPI_ISL_516609	male	41	Released	Pharyngeal swab
MEX_23	Mexico	EPI_ISL_576271	male	68	Live	Pharyngeal swab
MEX_24	Mexico	EPI_ISL_493349	male	83	Live	Pharyngeal swab
MEX_25	Mexico	EPI_ISL_455435	male	56	Deceased	Pharyngeal swab	Patient from Guadalajara
MEX_26	Mexico	EPI_ISL_522873	male	29	Live	Pharyngeal swab
MEX_27	Mexico	EPI_ISL_658865	male	28	Released	Pharyngeal swab
MEX_28	Mexico	EPI_ISL_576268	male	84	Deceased	Pharyngeal swab
MEX_29	Mexico	EPI_ISL_516610	male	25	Released	Pharyngeal swab
MEX_3	Mexico	EPI_ISL_522880	male	25	Live	Pharyngeal swab
MEX_30	Mexico	EPI_ISL_452141	male	38	Released	Pharyngeal swab	Traveled from Italy
MEX_31	Mexico	EPI_ISL_576264	female	32	Released	Pharyngeal swab
MEX_32	Mexico	EPI_ISL_522981	female	15	Live	Pharyngeal swab
MEX_33	Mexico	EPI_ISL_493346	male	20	Deceased	Pharyngeal swab
MEX_34	Mexico	EPI_ISL_658873	female	19	Released	Pharyngeal swab
MEX_35	Mexico	EPI_ISL_455455	female	32	Released	Pharyngeal swab
MEX_36	Mexico	EPI_ISL_455436	male	32	Released	Pharyngeal swab
MEX_37	Mexico	EPI_ISL_660068	male	66	Released	Pharyngeal swab
MEX_38	Mexico	EPI_ISL_576272	male	31	Released	Pharyngeal swab
MEX_39	Mexico	EPI_ISL_522872	female	38	Live	Pharyngeal swab
MEX_4	Mexico	EPI_ISL_522983	male	27	Live	Pharyngeal swab
MEX_40	Mexico	EPI_ISL_658899	female	47	Released	Pharyngeal swab
MEX_41	Mexico	EPI_ISL_576269	male	28	Released	Pharyngeal swab
MEX_42	Mexico	EPI_ISL_516611	male	74	Deceased	Pharyngeal swab
MEX_43	Mexico	EPI_ISL_576265	male	44	Released	Pharyngeal swab
MEX_44	Mexico	EPI_ISL_522980	female	25	Live	Pharyngeal swab
MEX_45	Mexico	EPI_ISL_658904	male	38	Released	Pharyngeal swab
MEX_46	Mexico	EPI_ISL_658868	male	42	Released	Pharyngeal swab
MEX_47	Mexico	EPI_ISL_455454	male	58	Deceased	Pharyngeal swab
MEX_48	Mexico	EPI_ISL_493347	female	9	Released	Pharyngeal swab
MEX_49	Mexico	EPI_ISL_455437	male	56	Deceased	unknown
MEX_5	Mexico	EPI_ISL_576266	male	60	Deceased	Pharyngeal swab
MEX_50	Mexico	EPI_ISL_658883	female	45	Released	Pharyngeal swab
MEX_51	Mexico	EPI_ISL_576273	male	26	Released	Pharyngeal swab
MEX_52	Mexico	EPI_ISL_452139	male	45	Released	Pharyngeal swab	Traveled from Bergamo, Italy (Feb 16-22)
MEX_53	Mexico	EPI_ISL_493335	female	74	Deceased	Pharyngeal swab
MEX_54	Mexico	EPI_ISL_522879	male	22	Live	Pharyngeal swab
MEX_55	Mexico	EPI_ISL_576262	female	28	Released	Pharyngeal swab
MEX_56	Mexico	EPI_ISL_516616	female	52	Released	Pharyngeal swab
MEX_57	Mexico	EPI_ISL_522875	female	22	Live	Pharyngeal swab
MEX_58	Mexico	EPI_ISL_658863	female	45	Released	Pharyngeal swab
MEX_59	Mexico	EPI_ISL_493339	male	42	Live	Pharyngeal swab
MEX_6	Mexico	EPI_ISL_493344	male	61	Released	Pharyngeal swab
MEX_60	Mexico	EPI_ISL_576274	female	25	Released	Pharyngeal swab
MEX_61	Mexico	EPI_ISL_516621	male	69	Released	Pharyngeal swab
MEX_62	Mexico	EPI_ISL_658888	female	44	Released	Pharyngeal swab
MEX_63	Mexico	EPI_ISL_658875	female	26	Released	Pharyngeal swab
MEX_64	Mexico	EPI_ISL_576259	male	27	Released	Pharyngeal swab
MEX_65	Mexico	EPI_ISL_493340	male	47	Deceased	Pharyngeal swab
MEX_66	Mexico	EPI_ISL_576278	female	76	Deceased	Pharyngeal swab
MEX_67	Mexico	EPI_ISL_522941	female	9	Live	Pharyngeal swab
MEX_68	Mexico	EPI_ISL_522878	male	30	Live	Pharyngeal swab
MEX_69	Mexico	EPI_ISL_658893	female	46	Released	Pharyngeal swab
MEX_7	Mexico	EPI_ISL_516625	male	79	Deceased	Pharyngeal swab
MEX_70	Mexico	EPI_ISL_493334	female	73	Deceased	Pharyngeal swab
MEX_71	Mexico	EPI_ISL_522986	female	33	Live	Pharyngeal swab
MEX_72	Mexico	EPI_ISL_576263	male	65	Live	Pharyngeal swab
MEX_73	Mexico	EPI_ISL_523500	male	39	Live	Pharyngeal swab
MEX_74	Mexico	EPI_ISL_516617	female	49	Released	Pharyngeal swab
MEX_75	Mexico	EPI_ISL_493338	female	68	Deceased	Pharyngeal swab
MEX_76	Mexico	EPI_ISL_522874	male	60	Live	Pharyngeal swab
MEX_77	Mexico	EPI_ISL_576275	male	73	Deceased	Pharyngeal swab
MEX_78	Mexico	EPI_ISL_658878	male	23	Released	Pharyngeal swab
MEX_79	Mexico	EPI_ISL_493341	male	29	Released	Pharyngeal swab
MEX_8	Mexico	EPI_ISL_455438	male	45	Released	Pharyngeal swab
MEX_80	Mexico	EPI_ISL_516620	female	24	Released	Pharyngeal swab
MEX_81	Mexico	EPI_ISL_576258	female	67	Released	Pharyngeal swab
MEX_82	Mexico	EPI_ISL_522940	male	45	Live	Pharyngeal swab
MEX_83	Mexico	EPI_ISL_576279	male	27	Released	Pharyngeal swab
MEX_84	Mexico	EPI_ISL_516618	male	51	Released	Pharyngeal swab
MEX_85	Mexico	EPI_ISL_576260	male	51	Released	Pharyngeal swab
MEX_86	Mexico	EPI_ISL_658901	female	47	Released	Pharyngeal swab
MEX_87	Mexico	EPI_ISL_522985	female	52	Live	Pharyngeal swab
MEX_88	Mexico	EPI_ISL_522978	male	49	Live	Pharyngeal swab
MEX_89	Mexico	EPI_ISL_493337	female	44	Released	Pharyngeal swab
MEX_9	Mexico	EPI_ISL_516608	male	33	Released	Pharyngeal swab
MEX_90	Mexico	EPI_ISL_522877	male	45	Live	Pharyngeal swab
MEX_91	Mexico	EPI_ISL_516614	male	63	Released	Pharyngeal swab
MEX_92	Mexico	EPI_ISL_658886	female	47	Released	Pharyngeal swab
MEX_93	Mexico	EPI_ISL_455432	male	74	Deceased	Pharyngeal swab	Sample from Gomez Palacios
MEX_94	Mexico	EPI_ISL_576276	male	42	Released	Pharyngeal swab
MEX_95	Mexico	EPI_ISL_516623	male	35	Deceased	Pharyngeal swab
MEX_96	Mexico	EPI_ISL_493342	female	50	Released	Pharyngeal swab
MEX_97	Mexico	EPI_ISL_516619	female	32	Released	Pharyngeal swab
MEX_98	Mexico	EPI_ISL_576261	female	66	Released	Pharyngeal swab
MEX_99	Mexico	EPI_ISL_658891	male	37	Released	Pharyngeal swab
PAN_1	Panama	EPI_ISL_496899	male	36	home	Pharyngeal swab
PAN_10	Panama	EPI_ISL_496790	male	41	home	Pharyngeal swab	Local
PAN_100	Panama	EPI_ISL_496867	male	23	home	Pharyngeal swab	Local
PAN_101	Panama	EPI_ISL_496793	male	49	home	Pharyngeal swab	Local
PAN_102	Panama	EPI_ISL_496896	male	26	home	Pharyngeal swab	Local
PAN_103	Panama	EPI_ISL_496804	male	18	home	Pharyngeal swab	Local
PAN_104	Panama	EPI_ISL_496701	male	86	home	Pharyngeal swab	Local
PAN_105	Panama	EPI_ISL_496907	female	41	home	Pharyngeal swab	Local
PAN_106	Panama	EPI_ISL_496825	male	30	home	Pharyngeal swab	Local
PAN_107	Panama	EPI_ISL_496618	male	43	home	Pharyngeal swab	Imported from USA
PAN_108	Panama	EPI_ISL_496677	female	49	home	Pharyngeal swab	Local
PAN_109	Panama	EPI_ISL_496871	male	53	home	Pharyngeal swab	Local
PAN_11	Panama	EPI_ISL_496895	male	22	home	Pharyngeal swab	Local
PAN_110	Panama	EPI_ISL_496774	female	47	home	Pharyngeal swab	Local
PAN_111	Panama	EPI_ISL_496789	male	33	home	Pharyngeal swab	Local
PAN_112	Panama	EPI_ISL_496850	female	42	home	Pharyngeal swab	Local
PAN_113	Panama	EPI_ISL_496833	female	26	home	Pharyngeal swab	Local
PAN_114	Panama	EPI_ISL_496736	female	71	home	Pharyngeal swab	Local
PAN_115	Panama	EPI_ISL_496880	male	30	home	Pharyngeal swab	Local
PAN_116	Panama	EPI_ISL_496778	female	60	home	Pharyngeal swab	Local
PAN_117	Panama	EPI_ISL_496785	female	34	home	Pharyngeal swab	Local
PAN_118	Panama	EPI_ISL_496911	male	42	home	Pharyngeal swab	Local
PAN_119	Panama	EPI_ISL_496614	female	28	home	Pharyngeal swab	Imported from Europe
PAN_12	Panama	EPI_ISL_496868	female	25	home	Pharyngeal swab	Local
PAN_120	Panama	EPI_ISL_496727	male	52	home	Pharyngeal swab	Local
PAN_121	Panama	EPI_ISL_496822	female	44	home	Pharyngeal swab	Local
PAN_122	Panama	EPI_ISL_496748	male	42	home	Pharyngeal swab	Local
PAN_123	Panama	EPI_ISL_496624	male	42	home	Pharyngeal swab	Imported from Spain
PAN_125	Panama	EPI_ISL_496891	male	27	home	Pharyngeal swab	Local
PAN_126	Panama	EPI_ISL_496803	female	23	home	Pharyngeal swab	Local
PAN_127	Panama	EPI_ISL_496706	male	49	Live	Pharyngeal swab	Local
PAN_128	Panama	EPI_ISL_496605	male	64	Deceased	Pharyngeal swab	Local
PAN_129	Panama	EPI_ISL_496900	male	38	home	Pharyngeal swab	Local
PAN_13	Panama	EPI_ISL_496756	female	29	home	Pharyngeal swab	Local
PAN_130	Panama	EPI_ISL_496609	female	57	Live	Pharyngeal swab	Local
PAN_131	Panama	EPI_ISL_496666	male	46	home	Pharyngeal swab	Local
PAN_132	Panama	EPI_ISL_496798	male	38	home	Pharyngeal swab	Local
PAN_133	Panama	EPI_ISL_496860	male	28	home	Pharyngeal swab	Local
PAN_134	Panama	EPI_ISL_496647	female	65	home	Pharyngeal swab	Local
PAN_135	Panama	EPI_ISL_496841	male	60	home	Pharyngeal swab	Local
PAN_136	Panama	EPI_ISL_496744	male	65	Deceased	Pharyngeal swab	Local
PAN_137	Panama	EPI_ISL_496887	male	34	home	Pharyngeal swab	Local
PAN_138	Panama	EPI_ISL_496782	male	36	home	Pharyngeal swab	Local
PAN_139	Panama	EPI_ISL_496710	female	60	home	Pharyngeal swab	Local
PAN_14	Panama	EPI_ISL_496853	female	34	home	Pharyngeal swab	Local
PAN_140	Panama	EPI_ISL_496815	male	40	home	Pharyngeal swab	Local
PAN_141	Panama	EPI_ISL_496613	male	31	home	Pharyngeal swab	Imported from Spain
PAN_142	Panama	EPI_ISL_496681	female	42	home	Pharyngeal swab	Local
PAN_143	Panama	EPI_ISL_496834	male	74	home	Pharyngeal swab	Local
PAN_144	Panama	EPI_ISL_496731	female	49	home	Pharyngeal swab	Local
PAN_145	Panama	EPI_ISL_496632	female	50	home	Pharyngeal swab	Local from social
PAN_146	Panama	EPI_ISL_496651	male	57	Deceased	Pharyngeal swab	Imported from USA
PAN_147	Panama	EPI_ISL_496838	female	38	home	Pharyngeal swab	Local
PAN_148	Panama	EPI_ISL_496857	male	39	home	Pharyngeal swab	Local
PAN_149	Panama	EPI_ISL_496670	male	63	Deceased	Pharyngeal swab	Local
PAN_15	Panama	EPI_ISL_496655	male	34	home	Pharyngeal swab	Local
PAN_150	Panama	EPI_ISL_496876	male	36	home	Pharyngeal swab	Local
PAN_151	Panama	EPI_ISL_496773	male	27	home	Pharyngeal swab	Local
PAN_152	Panama	EPI_ISL_496819	male	25	home	Pharyngeal swab	Local
PAN_153	Panama	EPI_ISL_496625	female	48	home	Pharyngeal swab	Imported from Spain
PAN_154	Panama	EPI_ISL_496823	male	20	home	Pharyngeal swab	Local
PAN_155	Panama	EPI_ISL_496726	female	44	home	Pharyngeal swab	Local
PAN_156	Panama	EPI_ISL_496749	male	48	home	Pharyngeal swab	Local
PAN_157	Panama	EPI_ISL_496901	male	28	home	Pharyngeal swab	Local
PAN_158	Panama	EPI_ISL_496604	female	43	home	Pharyngeal swab	Imported from Spain
PAN_159	Panama	EPI_ISL_496890	female	8	home	Pharyngeal swab	Local
PAN_16	Panama	EPI_ISL_496718	female	39	home	Pharyngeal swab	Local
PAN_160	Panama	EPI_ISL_496795	male	48	home	Pharyngeal swab	Local
PAN_161	Panama	EPI_ISL_496768	female	79	home	Pharyngeal swab	Local
PAN_162	Panama	EPI_ISL_496802	male	37	home	Pharyngeal swab	Local
PAN_163	Panama	EPI_ISL_496861	male	28	home	Pharyngeal swab	Local
PAN_164	Panama	EPI_ISL_496799	male	28	home	Pharyngeal swab	Local
PAN_165	Panama	EPI_ISL_496764	male	61	Live	Pharyngeal swab	Local
PAN_166	Panama	EPI_ISL_496608	female	35	home	Pharyngeal swab	Imported from USA
PAN_167	Panama	EPI_ISL_496745	male	29	home	Pharyngeal swab	Local
PAN_168	Panama	EPI_ISL_496840	female	42	home	Pharyngeal swab	Local
PAN_169	Panama	EPI_ISL_496646	male	62	home	Pharyngeal swab	Local
PAN_17	Panama	EPI_ISL_496777	male	27	home	Pharyngeal swab	Local
PAN_170	Panama	EPI_ISL_496629	female	45	home	Pharyngeal swab	Local from health
PAN_171	Panama	EPI_ISL_496612	male	38	home	Pharyngeal swab	Local
PAN_172	Panama	EPI_ISL_496680	male	46	home	Pharyngeal swab	Local
PAN_173	Panama	EPI_ISL_496783	female	33	home	Pharyngeal swab	Local
PAN_174	Panama	EPI_ISL_496886	male	47	home	Pharyngeal swab	Local
PAN_175	Panama	EPI_ISL_496814	male	89	home	Pharyngeal swab	Local
PAN_176	Panama	EPI_ISL_496711	male	40	home	Pharyngeal swab	Local
PAN_177	Panama	EPI_ISL_496633	female	40	home	Pharyngeal swab	Local from health
PAN_178	Panama	EPI_ISL_496730	female	7	home	Pharyngeal swab	Local
PAN_179	Panama	EPI_ISL_496835	female	61	home	Pharyngeal swab	Local
PAN_18	Panama	EPI_ISL_496689	female	64	home	Pharyngeal swab	Local
PAN_180	Panama	EPI_ISL_496856	male	38	home	Pharyngeal swab	Local
PAN_181	Panama	EPI_ISL_496753	male	19	home	Pharyngeal swab	Local
PAN_182	Panama	EPI_ISL_496650	female	28	home	Pharyngeal swab	Local
PAN_183	Panama	EPI_ISL_496772	male	19	home	Pharyngeal swab	Local
PAN_184	Panama	EPI_ISL_496877	male	54	home	Pharyngeal swab	Local
PAN_185	Panama	EPI_ISL_496818	female	19	home	Pharyngeal swab	Local
PAN_186	Panama	EPI_ISL_496671	male	46	home	Pharyngeal swab	Local
PAN_187	Panama	EPI_ISL_496801	male	30	home	Pharyngeal swab	Local
PAN_188	Panama	EPI_ISL_496893	male	43	home	Pharyngeal swab	Local
PAN_189	Panama	EPI_ISL_496796	male	48	home	Pharyngeal swab	Local
PAN_19	Panama	EPI_ISL_496685	male	49	home	Pharyngeal swab	Local
PAN_190	Panama	EPI_ISL_496695	male	30	home	Pharyngeal swab	Local
PAN_191	Panama	EPI_ISL_496607	female	58	Deceased	Pharyngeal swab	Local
PAN_192	Panama	EPI_ISL_496725	female	59	home	Pharyngeal swab	Local
PAN_193	Panama	EPI_ISL_496626	female	38	home	Pharyngeal swab	Imported from Germany
PAN_194	Panama	EPI_ISL_496649	female	45	home	Pharyngeal swab	Local
PAN_195	Panama	EPI_ISL_496645	female	30	home	Pharyngeal swab	Local
PAN_196	Panama	EPI_ISL_496746	male	28	home	Pharyngeal swab	Local
PAN_197	Panama	EPI_ISL_496843	female	40	home	Pharyngeal swab	Local
PAN_198	Panama	EPI_ISL_496664	male	40	home	Pharyngeal swab	Local
PAN_199	Panama	EPI_ISL_496699	male	53	home	Pharyngeal swab	Local
PAN_2	Panama	EPI_ISL_496908	male	46	home	Pharyngeal swab	Local
PAN_20	Panama	EPI_ISL_496678	female	38	home	Pharyngeal swab	Local
PAN_200	Panama	EPI_ISL_496708	female	46	home	Pharyngeal swab	Local
PAN_201	Panama	EPI_ISL_496862	male	27	home	Pharyngeal swab	Local
PAN_202	Panama	EPI_ISL_496767	female	40	home	Pharyngeal swab	Local
PAN_203	Panama	EPI_ISL_496859	female	26	home	Pharyngeal swab	Local
PAN_204	Panama	EPI_ISL_496733	male	49	home	Pharyngeal swab	Local
PAN_205	Panama	EPI_ISL_496836	male	56	home	Pharyngeal swab	Local
PAN_206	Panama	EPI_ISL_496630	female	60	home	Pharyngeal swab	Local from health
PAN_207	Panama	EPI_ISL_496817	male	45	home	Pharyngeal swab	Local
PAN_208	Panama	EPI_ISL_496712	male	60	home	Pharyngeal swab	Local
PAN_209	Panama	EPI_ISL_496780	female	41	home	Pharyngeal swab	Local
PAN_21	Panama	EPI_ISL_496617	female	37	home	Pharyngeal swab	Imported from USA
PAN_210	Panama	EPI_ISL_496878	male	31	home	Pharyngeal swab	Local
PAN_211	Panama	EPI_ISL_496885	male	70	home	Pharyngeal swab	Local
PAN_212	Panama	EPI_ISL_496683	female	10	home	Pharyngeal swab	Local
PAN_213	Panama	EPI_ISL_496611	male	61	home	Pharyngeal swab	Imported from USA
PAN_214	Panama	EPI_ISL_496914	male	26	home	Pharyngeal swab	Local
PAN_215	Panama	EPI_ISL_496771	male	26	home	Pharyngeal swab	Local
PAN_216	Panama	EPI_ISL_496874	male	60	home	Pharyngeal swab	Local
PAN_217	Panama	EPI_ISL_496889	male	21	home	Pharyngeal swab	Local
PAN_218	Panama	EPI_ISL_496653	male	45	home	Pharyngeal swab	Local
PAN_219	Panama	EPI_ISL_496855	male	50	home	Pharyngeal swab	Local
PAN_22	Panama	EPI_ISL_496714	female	60	Live	Pharyngeal swab	Local
PAN_220	Panama	EPI_ISL_496750	female	33	home	Pharyngeal swab	Local
PAN_221	Panama	EPI_ISL_496694	male	49	home	Pharyngeal swab	Local
PAN_222	Panama	EPI_ISL_496669	female	46	home	Pharyngeal swab	Local
PAN_223	Panama	EPI_ISL_496606	male	49	Live	Pharyngeal swab	Local
PAN_224	Panama	EPI_ISL_496903	female	23	home	Pharyngeal swab	Local
PAN_225	Panama	EPI_ISL_496800	female	25	home	Pharyngeal swab	Local
PAN_226	Panama	EPI_ISL_496705	male	31	home	Pharyngeal swab	Local
PAN_227	Panama	EPI_ISL_496797	female	67	home	Pharyngeal swab	Local
PAN_228	Panama	EPI_ISL_496892	male	28	home	Pharyngeal swab	Local
PAN_229	Panama	EPI_ISL_496627	female	13	home	Pharyngeal swab	Imported from USA
PAN_23	Panama	EPI_ISL_496811	female	42	home	Pharyngeal swab	Local
PAN_230	Panama	EPI_ISL_496648	male	54	home	Pharyngeal swab	Imported from USA
PAN_231	Panama	EPI_ISL_496724	female	35	home	Pharyngeal swab	local
PAN_232	Panama	EPI_ISL_496821	male	16	home	Pharyngeal swab	local
PAN_233	Panama	EPI_ISL_496842	male	45	home	Pharyngeal swab	local
PAN_234	Panama	EPI_ISL_496728	female	69	home	Pharyngeal swab	local
PAN_235	Panama	EPI_ISL_496644	male	48	home	Pharyngeal swab	local
PAN_236	Panama	EPI_ISL_496709	male	46	home	Pharyngeal swab	local
PAN_237	Panama	EPI_ISL_496766	female	99	home	Pharyngeal swab	local
PAN_238	Panama	EPI_ISL_496863	male	43	home	Pharyngeal swab	local
PAN_239	Panama	EPI_ISL_496665	female	37	home	Pharyngeal swab	local
PAN_24	Panama	EPI_ISL_496786	female	55	home	Pharyngeal swab	local
PAN_240	Panama	EPI_ISL_496631	female	43	home	Pharyngeal swab	Local from health
PAN_241	Panama	EPI_ISL_496837	female	25	home	Pharyngeal swab	local
PAN_242	Panama	EPI_ISL_496732	male	25	home	Pharyngeal swab	local
PAN_243	Panama	EPI_ISL_496682	male	43	home	Pharyngeal swab	local
PAN_244	Panama	EPI_ISL_496915	male	22	home	Pharyngeal swab	local
PAN_245	Panama	EPI_ISL_496610	male	60	Deceased	Pharyngeal swab	imported from USA
PAN_246	Panama	EPI_ISL_496713	male	55	home	Pharyngeal swab	local
PAN_247	Panama	EPI_ISL_496884	female	25	home	Pharyngeal swab	local
PAN_248	Panama	EPI_ISL_496879	female	30	home	Pharyngeal swab	local
PAN_249	Panama	EPI_ISL_496781	male	46	home	Pharyngeal swab	local
PAN_25	Panama	EPI_ISL_496636	male	49	home	Pharyngeal swab	local from police
PAN_250	Panama	EPI_ISL_496888	male	55	home	Pharyngeal swab	local
PAN_251	Panama	EPI_ISL_496875	male	48	home	Pharyngeal swab	local
PAN_252	Panama	EPI_ISL_496770	male	65	home	Pharyngeal swab	local
PAN_253	Panama	EPI_ISL_496751	female	58	home	Pharyngeal swab	local
PAN_254	Panama	EPI_ISL_496854	female	56	home	Pharyngeal swab	local
PAN_255	Panama	EPI_ISL_496652	female	29	home	Pharyngeal swab	local
PAN_26	Panama	EPI_ISL_496659	male	53	home	Pharyngeal swab	local
PAN_27	Panama	EPI_ISL_496830	female	31	home	Pharyngeal swab	local
PAN_28	Panama	EPI_ISL_496735	female	30	home	Pharyngeal swab	local
PAN_29	Panama	EPI_ISL_496663	male	30	home	Pharyngeal swab	local
PAN_3	Panama	EPI_ISL_496740	female	40	home	Pharyngeal swab	local
PAN_30	Panama	EPI_ISL_496909	male	37	home	Pharyngeal swab	local
PAN_31	Panama	EPI_ISL_496865	male	36	home	Pharyngeal swab	local
PAN_32	Panama	EPI_ISL_496898	male	40	home	Pharyngeal swab	local
PAN_33	Panama	EPI_ISL_496642	female	34	home	Pharyngeal swab	local
PAN_34	Panama	EPI_ISL_496741	male	66	home	Pharyngeal swab	local
PAN_35	Panama	EPI_ISL_496844	female	15	home	Pharyngeal swab	local
PAN_36	Panama	EPI_ISL_496848	female	41	home	Pharyngeal swab	local
PAN_37	Panama	EPI_ISL_496827	female	38	home	Pharyngeal swab	local
PAN_38	Panama	EPI_ISL_496722	female	73	home	Pharyngeal swab	local
PAN_39	Panama	EPI_ISL_496621	male	40	home	Pharyngeal swab	local
PAN_4	Panama	EPI_ISL_496643	male	36	home	Pharyngeal swab	local
PAN_40	Panama	EPI_ISL_496703	male	52	home	Pharyngeal swab	local
PAN_41	Panama	EPI_ISL_496806	male	28	home	Pharyngeal swab	local
PAN_42	Panama	EPI_ISL_496894	female	57	home	Pharyngeal swab	local
PAN_43	Panama	EPI_ISL_496791	male	1	home	Pharyngeal swab	local
PAN_44	Panama	EPI_ISL_496692	female	15	home	Pharyngeal swab	local
PAN_45	Panama	EPI_ISL_496654	female	61	home	Pharyngeal swab	local
PAN_46	Panama	EPI_ISL_496852	male	33	home	Pharyngeal swab	local
PAN_47	Panama	EPI_ISL_496675	male	46	home	Pharyngeal swab	local
PAN_48	Panama	EPI_ISL_496688	male	46	home	Pharyngeal swab	local
PAN_49	Panama	EPI_ISL_496719	male	26	home	Pharyngeal swab	local
PAN_5	Panama	EPI_ISL_496723	male	31	home	Pharyngeal swab	local
PAN_51	Panama	EPI_ISL_496873	female	21	home	Pharyngeal swab	local
PAN_52	Panama	EPI_ISL_496810	male	41	home	Pharyngeal swab	local
PAN_53	Panama	EPI_ISL_496715	male	25	home	Pharyngeal swab	local
PAN_54	Panama	EPI_ISL_496787	male	23	home	Pharyngeal swab	local
PAN_55	Panama	EPI_ISL_496679	female	59	Deceased	Pharyngeal swab	local
PAN_56	Panama	EPI_ISL_496684	female	2	home	Pharyngeal swab	local
PAN_57	Panama	EPI_ISL_496616	female	44	Live	Pharyngeal swab	Imported from Puerto Rico
PAN_58	Panama	EPI_ISL_496734	female	47	home	Pharyngeal swab	local
PAN_59	Panama	EPI_ISL_496831	male	43	home	Pharyngeal swab	local
PAN_6	Panama	EPI_ISL_496826	male	24	home	Pharyngeal swab	local
PAN_60	Panama	EPI_ISL_496637	male	54	home	Pharyngeal swab	local
PAN_61	Panama	EPI_ISL_496658	male	55	home	Pharyngeal swab	local
PAN_62	Panama	EPI_ISL_496828	male	61	home	Pharyngeal swab	local
PAN_63	Panama	EPI_ISL_496742	male	36	home	Pharyngeal swab	local
PAN_64	Panama	EPI_ISL_496847	male	34	home	Pharyngeal swab	local
PAN_65	Panama	EPI_ISL_496641	female	51	home	Pharyngeal swab	local
PAN_66	Panama	EPI_ISL_496763	male	22	home	Pharyngeal swab	local
PAN_67	Panama	EPI_ISL_496809	female	29	home	Pharyngeal swab	local
PAN_68	Panama	EPI_ISL_496660	male	42	home	Pharyngeal swab	local
PAN_69	Panama	EPI_ISL_496906	male	31	home	Pharyngeal swab	local
PAN_7	Panama	EPI_ISL_496693	male	48	home	Pharyngeal swab	local
PAN_70	Panama	EPI_ISL_496603	female	29	home	Pharyngeal swab	imported from USA
PAN_71	Panama	EPI_ISL_496897	male	35	home	Pharyngeal swab	local
PAN_72	Panama	EPI_ISL_496792	female	55	home	Pharyngeal swab	local
PAN_73	Panama	EPI_ISL_496700	female	17	home	Pharyngeal swab	local
PAN_74	Panama	EPI_ISL_496805	female	18	home	Pharyngeal swab	local
PAN_75	Panama	EPI_ISL_496824	male	23	home	Pharyngeal swab	local
PAN_76	Panama	EPI_ISL_496721	female	22	home	Pharyngeal swab	local
PAN_77	Panama	EPI_ISL_496788	male	34	home	Pharyngeal swab	local
PAN_78	Panama	EPI_ISL_496775	female	37	home	Pharyngeal swab	local
PAN_79	Panama	EPI_ISL_496870	female	48	home	Pharyngeal swab	local
PAN_8	Panama	EPI_ISL_496904	male	68	home	Pharyngeal swab	local
PAN_80	Panama	EPI_ISL_496619	female	70	home	Pharyngeal swab	imported from USA
PAN_81	Panama	EPI_ISL_496676	male	41	home	Pharyngeal swab	local
PAN_82	Panama	EPI_ISL_496851	male	32	home	Pharyngeal swab	local
PAN_83	Panama	EPI_ISL_496657	male	66	home	Pharyngeal swab	local
PAN_84	Panama	EPI_ISL_496638	male	41	home	Pharyngeal swab	local from airport
PAN_85	Panama	EPI_ISL_496634	male	63	home	Pharyngeal swab	imported from USA
PAN_86	Panama	EPI_ISL_496737	female	24	home	Pharyngeal swab	local
PAN_87	Panama	EPI_ISL_496832	female	36	home	Pharyngeal swab	local
PAN_88	Panama	EPI_ISL_496758	male	49	home	Pharyngeal swab	local
PAN_89	Panama	EPI_ISL_496615	male	34	home	Pharyngeal swab	imported from Spain
PAN_9	Panama	EPI_ISL_496702	male	40	home	Pharyngeal swab	local
PAN_90	Panama	EPI_ISL_496687	male	34	home	Pharyngeal swab	local
PAN_91	Panama	EPI_ISL_496784	male	43	home	Pharyngeal swab	local
PAN_92	Panama	EPI_ISL_496881	male	46	home	Pharyngeal swab	local
PAN_93	Panama	EPI_ISL_496813	male	27	home	Pharyngeal swab	local
PAN_94	Panama	EPI_ISL_496716	female	60	home	Pharyngeal swab	local
PAN_95	Panama	EPI_ISL_496640	male	48	home	Pharyngeal swab	local
PAN_96	Panama	EPI_ISL_496829	female	54	home	Pharyngeal swab	local
PAN_97	Panama	EPI_ISL_496846	female	52	home	Pharyngeal swab	local
PAN_98	Panama	EPI_ISL_496743	male	77	home	Pharyngeal swab	local
PAN_99	Panama	EPI_ISL_496762	male	37	home	Pharyngeal swab	local
MAF_1	Saint Martin	EPI_ISL_613456	male	26	Live	Pharyngeal swab
MAF_10	Saint Martin	EPI_ISL_613450	female	24	Live	Pharyngeal swab
MAF_2	Saint Martin	EPI_ISL_613455	female	29	Live	Pharyngeal swab
MAF_3	Saint Martin	EPI_ISL_613454	male	57	Live	Pharyngeal swab
MAF_4	Saint Martin	EPI_ISL_613453	male	50	Live	Pharyngeal swab
MAF_5	Saint Martin	EPI_ISL_613449	female	47	Live	Pharyngeal swab
MAF_7	Saint Martin	EPI_ISL_613448	male	54	Live	Pharyngeal swab
MAF_9	Saint Martin	EPI_ISL_613447	male	52	Live	Pharyngeal swab
USA_1	USA	EPI_ISL_583450	female	48	Live	Pharyngeal swab	same patient as for sequence EPI_ISL_583447
USA_10	USA	EPI_ISL_583471	female	35	Live	Pharyngeal swab	same patient as for sequence EPI_ISL_583469
USA_100	USA	EPI_ISL_583466	female	61	Live	Pharyngeal swab
USA_101	USA	EPI_ISL_463283	male	79	Live	Pharyngeal swab
USA_102	USA	EPI_ISL_436953	female	56	Live	Pharyngeal swab
USA_103	USA	EPI_ISL_475625	female	87	Deceased	unknown
USA_104	USA	EPI_ISL_644823	male	9	Live	Pharyngeal swab	possible MIS-C
USA_105	USA	EPI_ISL_475593	male	62	Released	unknown
USA_106	USA	EPI_ISL_583447	female	48	Live	Pharyngeal swab	same patient as for sequence EPI_ISL_583447
USA_107	USA	EPI_ISL_525640	male	84	Deceased	Pharyngeal swab
USA_108	USA	EPI_ISL_583428	male	52	Live	Pharyngeal swab
USA_109	USA	EPI_ISL_516748	male	18	Live	unknown
USA_11	USA	EPI_ISL_463294	male	57	Live	Pharyngeal swab
USA_110	USA	EPI_ISL_475629	male	87	Released	unknown
USA_111	USA	EPI_ISL_475646	male	75	Released	unknown
USA_112	USA	EPI_ISL_631735	female	88	Deceased	unknown
USA_113	USA	EPI_ISL_516769	male	23	Live	unknown
USA_114	USA	EPI_ISL_631617	female	65	Deceased	unknown
USA_115	USA	EPI_ISL_631811	male	36	Deceased	unknown
USA_116	USA	EPI_ISL_475667	male	98	Deceased	unknown
USA_117	USA	EPI_ISL_475608	male	68	Released	unknown
USA_118	USA	EPI_ISL_436946	female	55	Live	Pharyngeal swab
USA_119	USA	EPI_ISL_463296	female	27	Live	Pharyngeal swab
USA_12	USA	EPI_ISL_525676	male	52	Deceased	Pharyngeal swab
USA_120	USA	EPI_ISL_583473	male	52	Deceased	Pharyngeal swab	same patient as for sequence EPI_ISL_583472
USA_121	USA	EPI_ISL_516770	male	18	Live	unknown
USA_122	USA	EPI_ISL_475712	male	70	home	unknown
USA_123	USA	EPI_ISL_631762	male	38	Deceased	unknown
USA_124	USA	EPI_ISL_631867	female	78	Deceased	unknown
USA_125	USA	EPI_ISL_475611	male	34	home	unknown
USA_126	USA	EPI_ISL_677684	female	83	Live	unknown
USA_127	USA	EPI_ISL_677679	male	61	Live	unknown
USA_128	USA	EPI_ISL_631808	male	67	Deceased	unknown
USA_129	USA	EPI_ISL_475683	female	51	home	unknown
USA_13	USA	EPI_ISL_436944	female	24	Live	Pharyngeal swab
USA_130	USA	EPI_ISL_516751	male	19	Live	unknown
USA_131	USA	EPI_ISL_583452	female	48	Live	Pharyngeal swab	same patient as fir sequence EPI_ISL_583447
USA_132	USA	EPI_ISL_631829	male	81	Deceased	unknown
USA_133	USA	EPI_ISL_475586	female	59	Released	unknown
USA_134	USA	EPI_ISL_475630	female	74	Released	unknown
USA_135	USA	EPI_ISL_631720	male	94	Deceased	unknown
USA_136	USA	EPI_ISL_475653	male	37	Released	unknown
USA_137	USA	EPI_ISL_475577	female	61	home	unknown
USA_138	USA	EPI_ISL_631595	female	78	Deceased	unknown
USA_139	USA	EPI_ISL_583431	male	57	Live	Pharyngeal swab
USA_14	USA	EPI_ISL_475681	female	88	Released	unknown
USA_140	USA	EPI_ISL_631568	female	61	Deceased	unknown
USA_141	USA	EPI_ISL_525659	female	71	Deceased	Pharyngeal swab
USA_142	USA	EPI_ISL_677688	male	63	Live	unknown
USA_143	USA	EPI_ISL_475672	male	31	home	unknown
USA_144	USA	EPI_ISL_631701	male	85	Deceased	unknown
USA_145	USA	EPI_ISL_631602	male	81	Deceased	unknown
USA_146	USA	EPI_ISL_525678	female	92	Deceased	Pharyngeal swab
USA_147	USA	EPI_ISL_525685	male	56	Deceased	Pharyngeal swab
USA_148	USA	EPI_ISL_516781	male	18	Live	unknown
USA_149	USA	EPI_ISL_631690	female	48	Deceased	unknown
USA_15	USA	EPI_ISL_677686	male	49	Live	unknown
USA_150	USA	EPI_ISL_583444	male	52	Live	Pharyngeal swab
USA_151	USA	EPI_ISL_631639	male	36	Deceased	unknown
USA_152	USA	EPI_ISL_475590	female	70	Released	unknown
USA_153	USA	EPI_ISL_475649	female	88	Live	unknown
USA_154	USA	EPI_ISL_631755	female	83	Deceased	unknown
USA_155	USA	EPI_ISL_631850	male	62	Deceased	unknown
USA_156	USA	EPI_ISL_475626	male	63	Released	unknown
USA_157	USA	EPI_ISL_583465	male	60	Deceased	Pharyngeal swab
USA_158	USA	EPI_ISL_463280	male	48	Live	Pharyngeal swab
USA_159	USA	EPI_ISL_631618	male	38	Deceased	unknown
USA_16	USA	EPI_ISL_475613	male	59	Released	unknown
USA_160	USA	EPI_ISL_436950	female	76	Live	Pharyngeal swab
USA_161	USA	EPI_ISL_475704	female	33	home	unknown
USA_162	USA	EPI_ISL_516766	male	18	Live	unknown
USA_163	USA	EPI_ISL_677692	male	70	Live	unknown
USA_164	USA	EPI_ISL_475607	female	56	home	unknown
USA_165	USA	EPI_ISL_631774	male	86	Deceased	unknown
USA_166	USA	EPI_ISL_475668	female	28	home	unknown
USA_167	USA	EPI_ISL_475695	female	54	Released	unknown
USA_168	USA	EPI_ISL_631778	male	73	Deceased	unknown
USA_169	USA	EPI_ISL_631812	male	57	Deceased	unknown
USA_17	USA	EPI_ISL_631760	male	50	Deceased	unknown
USA_170	USA	EPI_ISL_475664	female	34	Released	unknown
USA_171	USA	EPI_ISL_475699	female	27	home	unknown
USA_172	USA	EPI_ISL_583469	female	35	Live	Pharyngeal swab
USA_173	USA	EPI_ISL_444022	male	40	home	Pharyngeal swab
USA_174	USA	EPI_ISL_631686	male	63	Deceased	unknown
USA_175	USA	EPI_ISL_475708	male	52	Released	unknown
USA_176	USA	EPI_ISL_445078	female	40	Asymptomatic	Pharyngeal swab
USA_177	USA	EPI_ISL_475645	male	44	Live	unknown
USA_178	USA	EPI_ISL_631736	male	86	Deceased	unknown
USA_179	USA	EPI_ISL_631759	female	58	Deceased	unknown
USA_18	USA	EPI_ISL_631703	male	77	Deceased	unknown
USA_180	USA	EPI_ISL_583427	female	77	Live	Pharyngeal swab
USA_181	USA	EPI_ISL_583448	female	48	Live	Pharyngeal swab	same patient as for sequence EPI_ISL_583447
USA_182	USA	EPI_ISL_631511	male	70	Deceased	unknown
USA_183	USA	EPI_ISL_631635	male	51	Deceased	unknown
USA_184	USA	EPI_ISL_677678	female	69	Live	unknown
USA_185	USA	EPI_ISL_677685	male	71	Live	unknown
USA_186	USA	EPI_ISL_631866	male	78	Deceased	unknown
USA_187	USA	EPI_ISL_475610	male	29	home	unknown
USA_188	USA	EPI_ISL_475682	male	73	Released	unknown
USA_189	USA	EPI_ISL_583472	male	52	Deceased	Pharyngeal swab
USA_19	USA	EPI_ISL_631806	male	85	Deceased	unknown
USA_190	USA	EPI_ISL_463297	male	45	Live	Pharyngeal swab
USA_191	USA	EPI_ISL_436947	female	32	Live	Pharyngeal swab
USA_192	USA	EPI_ISL_475713	male	87	Deceased	unknown
USA_193	USA	EPI_ISL_516771	male	19	Live	unknown
USA_194	USA	EPI_ISL_475587	female	60	Released	unknown
USA_195	USA	EPI_ISL_475631	male	74	Released	unknown
USA_196	USA	EPI_ISL_631598	male	90	Deceased	unknown
USA_197	USA	EPI_ISL_516750	male	19	Live	unknown
USA_198	USA	EPI_ISL_583453	female	48	Live	Pharyngeal swab	same patient as for sequence EPI_ISL_583447
USA_199	USA	EPI_ISL_525654	female	56	Deceased	Pharyngeal swab
USA_2	USA	EPI_ISL_525638	female	79	Deceased	Pharyngeal swab
USA_20	USA	EPI_ISL_475670	male	71	Live	unknown
USA_200	USA	EPI_ISL_631594	female	30	Deceased	unknown
USA_201	USA	EPI_ISL_583430	male	52	Live	Pharyngeal swab	same patient as for sequence EPI_ISL_583428
USA_202	USA	EPI_ISL_437433	male	56	Live	unknown
USA_203	USA	EPI_ISL_525658	male	67	Deceased	Pharyngeal swab
USA_204	USA	EPI_ISL_475576	female	39	home	unknown
USA_205	USA	EPI_ISL_475652	male	82	Deceased	unknown
USA_206	USA	EPI_ISL_525684	female	87	Deceased	Pharyngeal swab
USA_207	USA	EPI_ISL_525679	male	56	Deceased	Pharyngeal swab
USA_208	USA	EPI_ISL_631603	female	73	Deceased	unknown
USA_209	USA	EPI_ISL_631691	male	90	Deceased	unknown
USA_21	USA	EPI_ISL_593553	male	45	Deceased	Pharyngeal swab
USA_210	USA	EPI_ISL_516780	male	18	Live	unknown
USA_211	USA	EPI_ISL_677689	male	80	Live	unknown
USA_212	USA	EPI_ISL_631700	female	81	Deceased	unknown
USA_213	USA	EPI_ISL_475673	male	41	Released	unknown
USA_214	USA	EPI_ISL_475648	female	97	Released	unknown
USA_215	USA	EPI_ISL_475591	male	92	Deceased	unknown
USA_216	USA	EPI_ISL_475627	male	45	Released	unknown
USA_217	USA	EPI_ISL_631754	male	59	Deceased	unknown
USA_218	USA	EPI_ISL_631573	male	71	Deceased	unknown
USA_22	USA	EPI_ISL_463298	female	63	Live	Pharyngeal swab
USA_220	USA	EPI_ISL_525642	male	58	Deceased	Pharyngeal swab
USA_221	USA	EPI_ISL_583445	male	52	Live	Pharyngeal swab	same patient as for sequence EPI_ISL_583444
USA_222	USA	EPI_ISL_529036	female	88	Deceased	Pharyngeal swab
USA_223	USA	EPI_ISL_631775	female	86	Deceased	unknown
USA_224	USA	EPI_ISL_475606	male	48	Released	unknown	same patient as for sequence EPI_ISL_475705
USA_225	USA	EPI_ISL_475694	male	69	Released	unknown
USA_226	USA	EPI_ISL_475669	male	32	home	unknown
USA_227	USA	EPI_ISL_436951	female	57	Live	Pharyngeal swab
USA_228	USA	EPI_ISL_631619	male	58	Deceased	unknown
USA_229	USA	EPI_ISL_463281	male	40	Live	Pharyngeal swab
USA_23	USA	EPI_ISL_583480	male	61	Deceased	Pharyngeal swab	same patient as for sequence EPI_ISL_583479
USA_230	USA	EPI_ISL_583464	female	69	Live	Pharyngeal swab	same patient as for sequence EPI_ISL_583461
USA_231	USA	EPI_ISL_516767	female	18	Live	unknown
USA_232	USA	EPI_ISL_475705	male	74	Released	unknown
USA_233	USA	EPI_ISL_631615	male	80	Deceased	unknown
USA_234	USA	EPI_ISL_583468	female	61	Live	Sputum	same patient as for sequence EPI_ISL_583466
USA_235	USA	EPI_ISL_475709	female	29	Released	unknown
USA_236	USA	EPI_ISL_631687	female	87	Deceased	unknown
USA_237	USA	EPI_ISL_475698	male	43	Released	unknown
USA_238	USA	EPI_ISL_631813	male	69	Deceased	unknown
USA_239	USA	EPI_ISL_475665	female	73	Released	unknown
USA_24	USA	EPI_ISL_436948	female	65	Live	Pharyngeal swab
USA_240	USA	EPI_ISL_631716	female	73	Deceased	unknown
USA_241	USA	EPI_ISL_583426	female	77	Live	Pharyngeal swab	same patient as for sequence EPI_ISL_583427
USA_242	USA	EPI_ISL_525621	male	85	Deceased	Pharyngeal swab
USA_243	USA	EPI_ISL_631510	male	70	Deceased	unknown
USA_244	USA	EPI_ISL_583449	female	48	Live	Pharyngeal swab	same patient as for sequence EPI_ISL_583447
USA_245	USA	EPI_ISL_475644	female	67	Released	unknown
USA_246	USA	EPI_ISL_467809	male	60	Released	unknown
USA_247	USA	EPI_ISL_445079	female	55	home	Pharyngeal swab
USA_248	USA	EPI_ISL_445084	male	45	Critical	Pharyngeal swab
USA_249	USA	EPI_ISL_631758	female	82	Deceased	unknown
USA_25	USA	EPI_ISL_475588	male	83	Released	unknown
USA_250	USA	EPI_ISL_525683	male	64	Deceased	Pharyngeal swab
USA_251	USA	EPI_ISL_583479	male	61	Deceased	Pharyngeal swab
USA_252	USA	EPI_ISL_593557	male	45	Deceased	Pharyngeal swab
USA_253	USA	EPI_ISL_631696	female	80	Deceased	unknown
USA_254	USA	EPI_ISL_677673	female	50	Live	unknown
USA_255	USA	EPI_ISL_631768	female	89	Deceased	unknown
USA_256	USA	EPI_ISL_475689	male	39	Released	unknown
USA_257	USA	EPI_ISL_475674	female	71	Live	unknown
USA_258	USA	EPI_ISL_631593	male	51	Deceased	unknown
USA_259	USA	EPI_ISL_583437	male	57	Live	Pharyngeal swab	same patient as for sequence EPI_ISL_583431
USA_26	USA	EPI_ISL_475575	male	56	home	unknown
USA_260	USA	EPI_ISL_631625	female	75	Deceased	unknown
USA_261	USA	EPI_ISL_583458	female	63	Live	Pharyngeal swab	same patient as for sequence EPI_ISL_583456
USA_262	USA	EPI_ISL_475655	female	50	Released	unknown
USA_263	USA	EPI_ISL_631726	male	56	Deceased	unknown
USA_264	USA	EPI_ISL_475659	female	40	home	unknown
USA_265	USA	EPI_ISL_475580	female	44	Released	unknown
USA_266	USA	EPI_ISL_501171	male	32	Asymptomatic	Pharyngeal swab
USA_267	USA	EPI_ISL_593479	male	45	Deceased	Pharyngeal swab
USA_268	USA	EPI_ISL_631840	male	58	Deceased	unknown
USA_269	USA	EPI_ISL_475636	female	67	Released	unknown
USA_27	USA	EPI_ISL_475651	male	57	Released	unknown
USA_270	USA	EPI_ISL_631562	male	49	Deceased	unknown
USA_271	USA	EPI_ISL_516757	male	18	Live	unknown
USA_272	USA	EPI_ISL_436961	female	82	Live	Pharyngeal swab
USA_273	USA	EPI_ISL_631629	female	46	Deceased	unknown
USA_274	USA	EPI_ISL_583454	female	48	Live	Pharyngeal swab	same patient as for sequence EPI_ISL_583447
USA_275	USA	EPI_ISL_475617	female	37	home	unknown
USA_276	USA	EPI_ISL_677682	male	65	Live	unknown
USA_277	USA	EPI_ISL_475685	male	40	Deceased	unknown
USA_278	USA	EPI_ISL_475678	male	77	Released	unknown
USA_279	USA	EPI_ISL_436940	female	65	Live	Pharyngeal swab
USA_28	USA	EPI_ISL_631597	male	53	Deceased	unknown
USA_280	USA	EPI_ISL_648265	male	60	Released	Anal fluid
USA_281	USA	EPI_ISL_463290	female	58	Live	Pharyngeal swab
USA_282	USA	EPI_ISL_583475	male	63	Live	Pharyngeal swab
USA_283	USA	EPI_ISL_516776	male	20	Live	unknown
USA_284	USA	EPI_ISL_475714	male	62	Released	unknown
USA_285	USA	EPI_ISL_525649	female	66	Deceased	Pharyngeal swab
USA_286	USA	EPI_ISL_631633	male	88	Deceased	unknown
USA_287	USA	EPI_ISL_445083	male	43	Asymptomatic	Pharyngeal swab
USA_288	USA	EPI_ISL_631835	male	89	Deceased	unknown
USA_289	USA	EPI_ISL_475643	male	29	Live	unknown
USA_29	USA	EPI_ISL_583433	male	57	Live	Pharyngeal swab	same patient as for sequence EPI_ISL_583431
USA_290	USA	EPI_ISL_463277	female	44	Live	Pharyngeal swab
USA_291	USA	EPI_ISL_444994	male	21	home	Pharyngeal swab
USA_292	USA	EPI_ISL_526688	male	51	Deceased	Anal fluid
USA_293	USA	EPI_ISL_631814	male	52	Deceased	unknown
USA_294	USA	EPI_ISL_475662	male	28	home	unknown
USA_295	USA	EPI_ISL_631711	male	98	Deceased	unknown
USA_296	USA	EPI_ISL_631772	male	76	Deceased	unknown
USA_297	USA	EPI_ISL_475601	male	33	Released	unknown
USA_298	USA	EPI_ISL_475693	male	39	Released	unknown
USA_299	USA	EPI_ISL_583463	female	69	Live	Pharyngeal swab	same patient as for sequence EPI_ISL_583461
USA_3	USA	EPI_ISL_516753	male	18	Live	unknown
USA_30	USA	EPI_ISL_516764	male	18	Live	unknown
USA_300	USA	EPI_ISL_463286	female	72	Live	Pharyngeal swab
USA_301	USA	EPI_ISL_436956	female	52	Live	Pharyngeal swab
USA_302	USA	EPI_ISL_475702	female	100	Live	unknown
USA_303	USA	EPI_ISL_436939	female	68	Live	Pharyngeal swab
USA_304	USA	EPI_ISL_516760	male	18	Live	unknown
USA_305	USA	EPI_ISL_501167	female	51	Critical	Pharyngeal swab
USA_306	USA	EPI_ISL_475596	female	43	home	unknown
USA_307	USA	EPI_ISL_631856	male	69	Deceased	unknown
USA_308	USA	EPI_ISL_475620	male	61	Released	unknown
USA_309	USA	EPI_ISL_631574	male	91	Deceased	unknown
USA_31	USA	EPI_ISL_475706	male	33	Released	unknown
USA_310	USA	EPI_ISL_631589	male	62	Deceased	unknown
USA_311	USA	EPI_ISL_583442	male	57	Live	Pharyngeal swab	same patient as for sequence EPI_ISL_583439
USA_312	USA	EPI_ISL_631769	female	86	Deceased	unknown
USA_313	USA	EPI_ISL_539495	male	6	Recovered	Pharyngeal swab
USA_314	USA	EPI_ISL_631803	male	63	Deceased	unknown
USA_315	USA	EPI_ISL_475675	male	92	Released	unknown
USA_316	USA	EPI_ISL_475688	male	55	Released	unknown
USA_317	USA	EPI_ISL_631706	male	80	Deceased	unknown
USA_318	USA	EPI_ISL_583478	male	70	Live	Pharyngeal swab
USA_319	USA	EPI_ISL_631605	male	41	Deceased	unknown
USA_32	USA	EPI_ISL_436952	male	67	Live	Pharyngeal swab
USA_320	USA	EPI_ISL_525682	male	75	Deceased	Pharyngeal swab
USA_321	USA	EPI_ISL_631697	male	61	Deceased	unknown
USA_322	USA	EPI_ISL_593556	male	45	Deceased	Pharyngeal swab
USA_323	USA	EPI_ISL_475654	male	85	Released	unknown
USA_324	USA	EPI_ISL_525631	male	64	Deceased	Pharyngeal swab
USA_325	USA	EPI_ISL_631592	male	71	Deceased	unknown
USA_326	USA	EPI_ISL_583436	male	57	Live	Pharyngeal swab	same patient as for sequence EPI_ISL_583431
USA_327	USA	EPI_ISL_583459	female	63	Live	Pharyngeal swab	same patient as for sequence EPI_ISL_583456
USA_328	USA	EPI_ISL_631624	male	69	Deceased	unknown
USA_329	USA	EPI_ISL_516756	male	18	Live	unknown
USA_33	USA	EPI_ISL_463282	male	49	Live	Pharyngeal swab
USA_330	USA	EPI_ISL_583455	female	66	Live	Pharyngeal swab
USA_331	USA	EPI_ISL_631628	male	75	Deceased	unknown
USA_332	USA	EPI_ISL_436960	female	92	Live	Pharyngeal swab
USA_333	USA	EPI_ISL_501170	male	28	Asymptomatic	Pharyngeal swab
USA_334	USA	EPI_ISL_475581	female	52	home	unknown
USA_335	USA	EPI_ISL_475658	male	56	Released	unknown
USA_336	USA	EPI_ISL_631841	male	63	Deceased	unknown
USA_337	USA	EPI_ISL_475637	male	69	Deceased	unknown
USA_338	USA	EPI_ISL_593478	male	45	Deceased	Pharyngeal swab
USA_339	USA	EPI_ISL_583474	male	69	Live	Pharyngeal swab
USA_34	USA	EPI_ISL_583467	female	61	Live	Pharyngeal swab	same patient as for sequence EPI_ISL_583466
USA_340	USA	EPI_ISL_463291	female	45	Live	Pharyngeal swab
USA_341	USA	EPI_ISL_436941	female	42	Live	Pharyngeal swab
USA_342	USA	EPI_ISL_475715	female	80	Deceased	unknown
USA_343	USA	EPI_ISL_516777	male	18	Live	unknown
USA_344	USA	EPI_ISL_631542	male	54	Deceased	unknown
USA_345	USA	EPI_ISL_631798	male	60	Deceased	unknown
USA_346	USA	EPI_ISL_677683	male	39	Live	unknown
USA_347	USA	EPI_ISL_475616	male	66	Deceased	unknown
USA_348	USA	EPI_ISL_463300	female	89	Live	Pharyngeal swab
USA_349	USA	EPI_ISL_475679	male	33	Released	unknown
USA_35	USA	EPI_ISL_475697	female	83	Released	unknown
USA_350	USA	EPI_ISL_475684	male	66	Released	unknown
USA_351	USA	EPI_ISL_475642	male	44	Released	unknown
USA_352	USA	EPI_ISL_445082	female	55	Critical	Pharyngeal swab
USA_353	USA	EPI_ISL_631584	male	62	Deceased	unknown
USA_354	USA	EPI_ISL_525627	male	72	Deceased	Pharyngeal swab
USA_355	USA	EPI_ISL_525648	male	45	Deceased	Pharyngeal swab
USA_356	USA	EPI_ISL_677699	female	56	Live	unknown
USA_357	USA	EPI_ISL_631782	female	64	Deceased	unknown
USA_358	USA	EPI_ISL_631710	male	77	Deceased	unknown
USA_359	USA	EPI_ISL_631815	male	69	Deceased	unknown
USA_36	USA	EPI_ISL_631719	male	81	Deceased	unknown
USA_360	USA	EPI_ISL_475663	male	90	Deceased	unknown
USA_361	USA	EPI_ISL_631613	male	73	Deceased	unknown
USA_362	USA	EPI_ISL_631558	male	62	Deceased	unknown
USA_363	USA	EPI_ISL_444995	male	29	home	Pharyngeal swab
USA_364	USA	EPI_ISL_436957	female	46	Live	Pharyngeal swab
USA_365	USA	EPI_ISL_463287	male	57	Deceased	Pharyngeal swab
USA_366	USA	EPI_ISL_583462	female	69	Live	Pharyngeal swab	same patient as for sequence EPI_ISL_583461
USA_367	USA	EPI_ISL_516761	male	19	Live	unknown
USA_368	USA	EPI_ISL_631554	male	59	Deceased	unknown
USA_369	USA	EPI_ISL_475703	male	69	Released	unknown
USA_37	USA	EPI_ISL_529035	male	51	Deceased	Pharyngeal swab
USA_370	USA	EPI_ISL_475600	male	66	Live	unknown
USA_371	USA	EPI_ISL_677695	female	66	Live	unknown
USA_372	USA	EPI_ISL_631773	male	68	Deceased	unknown
USA_373	USA	EPI_ISL_475692	female	27	home	unknown
USA_376	USA	EPI_ISL_583443	male	57	Live	Pharyngeal swab	same patient as for sequence EPI_ISL_583439
USA_377	USA	EPI_ISL_475597	female	68	home	unknown
USA_378	USA	EPI_ISL_475621	female	49	Deceased	unknown
USA_379	USA	EPI_ISL_631591	male	50	Deceased	unknown
USA_38	USA	EPI_ISL_631776	male	80	Deceased	unknown
USA_380	USA	EPI_ISL_583435	male	57	Live	Pharyngeal swab	same patient as for sequence EPI_ISL_583431
USA_381	USA	EPI_ISL_548243	male	36	Released	Pharyngeal swab
USA_382	USA	EPI_ISL_516759	male	18	Live	unknown
USA_383	USA	EPI_ISL_475638	male	19	Released	unknown
USA_384	USA	EPI_ISL_631724	male	69	Deceased	unknown
USA_385	USA	EPI_ISL_631821	male	36	Deceased	unknown
USA_386	USA	EPI_ISL_475657	male	59	Deceased	unknown
USA_387	USA	EPI_ISL_631694	male	45	Deceased	unknown
USA_388	USA	EPI_ISL_593555	male	45	Deceased	unknown
USA_389	USA	EPI_ISL_516778	male	18	Live	unknown
USA_39	USA	EPI_ISL_475605	female	87	Released	unknown
USA_390	USA	EPI_ISL_631606	male	90	Deceased	unknown
USA_391	USA	EPI_ISL_525681	male	53	Deceased	Pharyngeal swab
USA_392	USA	EPI_ISL_475676	male	47	Deceased	unknown
USA_393	USA	EPI_ISL_631705	female	79	Deceased	unknown
USA_394	USA	EPI_ISL_631797	male	61	Deceased	unknown
USA_395	USA	EPI_ISL_475619	male	92	Deceased	unknown
USA_396	USA	EPI_ISL_475687	male	57	Released	unknown
USA_397	USA	EPI_ISL_677680	female	69	Live	unknown
USA_398	USA	EPI_ISL_475615	female	90	Deceased	unknown
USA_399	USA	EPI_ISL_475716	male	79	Released	unknown
USA_4	USA	EPI_ISL_475632	male	42	home	unknown
USA_40	USA	EPI_ISL_525641	male	74	Deceased	Pharyngeal swab
USA_400	USA	EPI_ISL_631698	male	63	Deceased	unknown
USA_401	USA	EPI_ISL_516774	male	19	Live	unknown
USA_402	USA	EPI_ISL_583477	male	63	Live	Pharyngeal swab	same patient as for sequence EPI_ISL_583475
USA_403	USA	EPI_ISL_463292	female	28	Live	Pharyngeal swab
USA_404	USA	EPI_ISL_648267	male	54	Released	Anal fluid
USA_405	USA	EPI_ISL_436942	male	45	Live	Pharyngeal swab
USA_406	USA	EPI_ISL_475634	male	55	home	unknown
USA_407	USA	EPI_ISL_501173	male	77	Critical	Pharyngeal swab
USA_408	USA	EPI_ISL_475582	male	90	Live	unknown
USA_409	USA	EPI_ISL_631728	female	85	Deceased	unknown
USA_41	USA	EPI_ISL_583446	female	48	Live	Pharyngeal swab
USA_410	USA	EPI_ISL_583456	female	63	Live	Pharyngeal swab
USA_411	USA	EPI_ISL_516755	male	18	Live	unknown
USA_412	USA	EPI_ISL_583439	male	57	Live	Pharyngeal swab
USA_413	USA	EPI_ISL_444996	female	34	home	Pharyngeal swab
USA_414	USA	EPI_ISL_436958	male	21	Live	Pharyngeal swab
USA_415	USA	EPI_ISL_631610	female	89	Deceased	unknown
USA_416	USA	EPI_ISL_463288	male	60	Live	Pharyngeal swab
USA_417	USA	EPI_ISL_475660	male	28	home	unknown
USA_418	USA	EPI_ISL_631781	female	93	Deceased	unknown
USA_419	USA	EPI_ISL_513294	male	46	Asymptomatic	Pharyngeal swab
USA_42	USA	EPI_ISL_583429	male	52	Live	Pharyngeal swab	same patient as for sequence EPI_ISL_583428
USA_420	USA	EPI_ISL_631587	female	58	Deceased	unknown
USA_421	USA	EPI_ISL_475641	male	60	Released	unknown
USA_422	USA	EPI_ISL_631732	male	66	Deceased	unknown
USA_423	USA	EPI_ISL_445081	female	35	Critical	Pharyngeal swab
USA_424	USA	EPI_ISL_475598	female	74	Released	unknown
USA_425	USA	EPI_ISL_501169	male	66	Critical	Pharyngeal swab
USA_426	USA	EPI_ISL_475622	male	39	Released	unknown
USA_427	USA	EPI_ISL_475594	female	89	Released	unknown
USA_428	USA	EPI_ISL_525647	female	71	Deceased	Pharyngeal swab
USA_429	USA	EPI_ISL_583440	male	57	Live	Pharyngeal swab	same patient as for sequence EPI_ISL_583439
USA_43	USA	EPI_ISL_631570	male	63	Deceased	unknown
USA_430	USA	EPI_ISL_475691	female	84	Deceased	unknown
USA_431	USA	EPI_ISL_526686	female	66	Deceased	Anal fluid
USA_432	USA	EPI_ISL_475603	male	77	Released	unknown
USA_433	USA	EPI_ISL_677696	male	54	Live	unknown
USA_434	USA	EPI_ISL_631770	female	89	Deceased	unknown
USA_435	USA	EPI_ISL_516762	male	18	Live	unknown
USA_436	USA	EPI_ISL_475700	female	36	Released	unknown
USA_437	USA	EPI_ISL_436954	male	50	Live	Pharyngeal swab
USA_438	USA	EPI_ISL_463279	female	37	Live	Pharyngeal swab
USA_439	USA	EPI_ISL_631538	male	67	Deceased	unknown
USA_44	USA	EPI_ISL_475624	male	45	Released	unknown
USA_440	USA	EPI_ISL_463284	male	33	Live	Pharyngeal swab
USA_441	USA	EPI_ISL_583461	female	69	Live	Pharyngeal swab
USA_442	USA	EPI_ISL_475639	female	77	Released	unknown
USA_443	USA	EPI_ISL_475656	male	49	Released	unknown
USA_444	USA	EPI_ISL_525578	female	66	Deceased	Pharyngeal swab
USA_445	USA	EPI_ISL_583434	male	57	Live	Pharyngeal swab	same patient as for sequence EPI_ISL_583431
USA_446	USA	EPI_ISL_516758	male	18	Live	unknown
USA_447	USA	EPI_ISL_631704	male	79	Deceased	unknown
USA_448	USA	EPI_ISL_631801	male	77	Deceased	unknown
USA_449	USA	EPI_ISL_475677	female	48	Released	unknown
USA_45	USA	EPI_ISL_631757	male	46	Deceased	unknown
USA_450	USA	EPI_ISL_475618	male	64	Released	unknown
USA_451	USA	EPI_ISL_516779	male	18	Live	unknown
USA_452	USA	EPI_ISL_593554	male	45	Deceased	Pharyngeal swab
USA_453	USA	EPI_ISL_631695	male	83	Deceased	unknown
USA_454	USA	EPI_ISL_525680	male	80	Deceased	Pharyngeal swab
USA_455	USA	EPI_ISL_631607	male	79	Deceased	unknown
USA_456	USA	EPI_ISL_516775	male	23	Live	unknown
USA_457	USA	EPI_ISL_593558	male	45	Deceased	Pharyngeal swab
USA_458	USA	EPI_ISL_631699	female	75	Deceased	unknown
USA_459	USA	EPI_ISL_436943	male	57	Live	Pharyngeal swab
USA_46	USA	EPI_ISL_475592	male	27	Released	unknown
USA_460	USA	EPI_ISL_463293	female	42	Live	Pharyngeal swab
USA_461	USA	EPI_ISL_583476	male	63	Live	Pharyngeal swab	same patient as for sequence EPI_ISL_583475
USA_462	USA	EPI_ISL_631708	male	78	Deceased	unknown
USA_463	USA	EPI_ISL_475686	male	64	Released	unknown
USA_464	USA	EPI_ISL_475614	male	79	Deceased	unknown
USA_465	USA	EPI_ISL_677681	male	82	Live	unknown
USA_466	USA	EPI_ISL_631767	male	78	Deceased	unknown
USA_467	USA	EPI_ISL_525650	female	80	Deceased	Pharyngeal swab
USA_468	USA	EPI_ISL_583457	female	63	Live	Pharyngeal swab	same patient as for sequence EPI_ISL_583456
USA_469	USA	EPI_ISL_516754	male	19	Live	unknown
USA_47	USA	EPI_ISL_475628	female	43	Released	unknown
USA_470	USA	EPI_ISL_583438	male	57	Live	Pharyngeal swab	same patient as for sequence EPI_ISL_583431
USA_471	USA	EPI_ISL_631561	female	76	Deceased	unknown
USA_472	USA	EPI_ISL_475635	female	38	home	unknown
USA_473	USA	EPI_ISL_631729	male	89	Deceased	unknown
USA_474	USA	EPI_ISL_475583	male	73	Released	unknown
USA_475	USA	EPI_ISL_501172	male	48	home	Pharyngeal swab
USA_476	USA	EPI_ISL_475661	male	76	Live	unknown
USA_477	USA	EPI_ISL_631712	male	84	Deceased	unknown
USA_478	USA	EPI_ISL_463289	female	25	Live	Pharyngeal swab
USA_479	USA	EPI_ISL_631611	male	21	Deceased	unknown
USA_48	USA	EPI_ISL_631734	male	72	Deceased	unknown
USA_480	USA	EPI_ISL_436959	male	50	Live	Pharyngeal swab
USA_481	USA	EPI_ISL_501168	male	58	Critical	Pharyngeal swab
USA_482	USA	EPI_ISL_475599	female	51	home	unknown
USA_483	USA	EPI_ISL_445080	male	40	home	Pharyngeal swab
USA_484	USA	EPI_ISL_631733	female	64	Deceased	unknown
USA_485	USA	EPI_ISL_631836	male	100	Deceased	unknown
USA_486	USA	EPI_ISL_475640	female	32	home	unknown
USA_487	USA	EPI_ISL_583441	male	57	Live	Pharyngeal swab	same patient as for sequence EPI_ISL_583439
USA_488	USA	EPI_ISL_525646	male	57	Deceased	Pharyngeal swab
USA_489	USA	EPI_ISL_631577	male	60	Deceased	unknown
USA_49	USA	EPI_ISL_631831	male	73	Deceased	unknown
USA_490	USA	EPI_ISL_475623	female	58	home	unknown
USA_491	USA	EPI_ISL_475595	male	83	home	unknown
USA_492	USA	EPI_ISL_475701	female	44	Deceased	unknown
USA_493	USA	EPI_ISL_516763	male	18	Live	unknown
USA_494	USA	EPI_ISL_631556	male	73	Deceased	unknown
USA_495	USA	EPI_ISL_583460	female	63	Live	Pharyngeal swab	same patient as for sequence EPI_ISL_583456
USA_496	USA	EPI_ISL_648270	female	71	Released	Anal fluid
USA_497	USA	EPI_ISL_463285	female	50	Live	Pharyngeal swab
USA_498	USA	EPI_ISL_463278	female	53	Live	Pharyngeal swab
USA_499	USA	EPI_ISL_436955	female	93	Live	Pharyngeal swab
USA_5	USA	EPI_ISL_593480	male	45	Deceased	Pharyngeal swab
USA_50	USA	EPI_ISL_475647	male	56	Released	unknown
USA_500	USA	EPI_ISL_475690	female	66	Deceased	unknown
USA_501	USA	EPI_ISL_475602	female	93	Deceased	unknown
USA_502	USA	EPI_ISL_526687	male	36	Released	Anal fluid
USA_51	USA	EPI_ISL_631637	male	79	Deceased	unknown
USA_52	USA	EPI_ISL_631513	male	65	Deceased	unknown
USA_53	USA	EPI_ISL_516749	male	19	Live	unknown
USA_54	USA	EPI_ISL_475666	female	59	Released	unknown
USA_55	USA	EPI_ISL_631715	male	86	Deceased	unknown
USA_56	USA	EPI_ISL_475609	male	28	Released	unknown
USA_57	USA	EPI_ISL_516768	male	18	Live	unknown
USA_58	USA	EPI_ISL_631616	male	74	Deceased	unknown
USA_59	USA	EPI_ISL_631845	female	82	Deceased	unknown
USA_6	USA	EPI_ISL_475584	male	46	Released	unknown
USA_60	USA	EPI_ISL_475633	female	27	home	unknown
USA_61	USA	EPI_ISL_631740	male	67	Deceased	unknown
USA_62	USA	EPI_ISL_501174	female	52	home	Pharyngeal swab
USA_63	USA	EPI_ISL_475578	female	46	Released	unknown
USA_64	USA	EPI_ISL_475585	male	75	Released	unknown
USA_65	USA	EPI_ISL_583451	female	48	Live	Pharyngeal swab	same patient as for sequence EPI_ISL_583447
USA_66	USA	EPI_ISL_516752	male	18	Live	unknown
USA_67	USA	EPI_ISL_525639	male	79	Deceased	Pharyngeal swab
USA_68	USA	EPI_ISL_475680	female	36	home	unknown
USA_69	USA	EPI_ISL_631761	male	30	Deceased	unknown
USA_7	USA	EPI_ISL_475579	female	60	home	unknown
USA_70	USA	EPI_ISL_475612	male	49	Released	unknown
USA_71	USA	EPI_ISL_677687	male	48	Live	unknown
USA_72	USA	EPI_ISL_631546	male	76	Deceased	unknown
USA_73	USA	EPI_ISL_516773	male	18	Live	unknown
USA_74	USA	EPI_ISL_475711	female	91	Released	unknown
USA_75	USA	EPI_ISL_436945	female	49	Live	Pharyngeal swab
USA_76	USA	EPI_ISL_525677	female	77	Deceased	Pharyngeal swab
USA_77	USA	EPI_ISL_463295	female	68	Live	Pharyngeal swab
USA_78	USA	EPI_ISL_583470	female	35	Live	Pharyngeal swab	same patient as for sequence EPI_ISL_583469
USA_79	USA	EPI_ISL_516782	male	18	Live	unknown
USA_8	USA	EPI_ISL_475710	female	81	Deceased	unknown
USA_80	USA	EPI_ISL_436949	female	35	Live	Pharyngeal swab
USA_81	USA	EPI_ISL_525686	male	25	Deceased	Pharyngeal swab
USA_82	USA	EPI_ISL_463299	female	55	Live	Pharyngeal swab
USA_83	USA	EPI_ISL_475671	male	67	Released	unknown
USA_84	USA	EPI_ISL_631790	female	84	Deceased	unknown
USA_85	USA	EPI_ISL_631868	male	48	Deceased	unknown
USA_86	USA	EPI_ISL_631504	female	82	Deceased	unknown
USA_87	USA	EPI_ISL_548244	male	51	Deceased	Pharyngeal swab
USA_88	USA	EPI_ISL_631596	male	89	Deceased	unknown
USA_89	USA	EPI_ISL_583432	male	57	Live	Pharyngeal swab	same patient as for sequence EPI_ISL_583431
USA_9	USA	EPI_ISL_516772	male	18	Live	unknown
USA_90	USA	EPI_ISL_631723	male	53	Deceased	unknown
USA_91	USA	EPI_ISL_475650	female	66	Released	unknown
USA_92	USA	EPI_ISL_475574	male	62	Released	unknown
USA_93	USA	EPI_ISL_475589	female	38	Released	unknown
USA_94	USA	EPI_ISL_475696	female	75	Released	unknown
USA_95	USA	EPI_ISL_475604	female	67	Released	unknown
USA_96	USA	EPI_ISL_631777	female	91	Deceased	unknown
USA_97	USA	EPI_ISL_631689	male	32	Deceased	unknown
USA_98	USA	EPI_ISL_475707	male	39	Released	unknown
USA_99	USA	EPI_ISL_516765	male	18	Live	unknown

## Sheet: South America
Isolate/Country code	Country	Accession No.	gender	age	status	specimen source	Additional Information
ARG_1	Argentina	EPI_ISL_499083	female	69	live	Pharyngeal swab
ARG_2	Argentina	EPI_ISL_648217	male	56	released	Pharyngeal swab	Asymptomatic
BRA_1	Brazil	EPI_ISL_515525	male	60	unknown	Pharyngeal swab
BRA_10	Brazil	EPI_ISL_574595	female	53	unknown	Pharyngeal swab
BRA_100	Brazil	EPI_ISL_534317	female	62	deceased	Pharyngeal swab
BRA_101	Brazil	EPI_ISL_574582	male	63	live	Pharyngeal swab
BRA_102	Brazil	EPI_ISL_693208	male	37	deceased	Pharyngeal swab
BRA_103	Brazil	EPI_ISL_513565	male	61	live	Pharyngeal swab
BRA_104	Brazil	EPI_ISL_492035	male	52	live	Pharyngeal swab
BRA_105	Brazil	EPI_ISL_471581	male	59	deceased	Pharyngeal swab
BRA_106	Brazil	EPI_ISL_468321	male	72	deceased	Pharyngeal swab
BRA_107	Brazil	EPI_ISL_623119	female	57	released	Pharyngeal swab
BRA_108	Brazil	EPI_ISL_672727	male	74	released	Pharyngeal swab
BRA_109	Brazil	EPI_ISL_583499	female	90	deceased	Pharyngeal swab
BRA_11	Brazil	EPI_ISL_513553	female	40	unknown	Pharyngeal swab
BRA_110	Brazil	EPI_ISL_623115	female	39	released	Pharyngeal swab
BRA_111	Brazil	EPI_ISL_603021	female	63	deceased	Pharyngeal swab
[truncated: 724 more rows]

## Sheet: Oceania
Isolate Code	Country	Accession	Gender	Age	Status	Specimen source	Additional Information/Transmission History
[truncated: 18 more rows]
